# Supplementary material for: Transcriptional Landscape of Pathogen-responsive Lncrnas Reveals OS_LNC1812-Induced Disease Resistance by Abscisic Acid Pathway in Rice
Source: Research Square preprint supplement (doi:10.21203/rs.3.rs-244393/v1), 2021-03-01
Supplement: Supplementary file 2 [file 24cb187f16b4f1c2bce08d9c.xlsx]

## Sheet: align_summary.all
Sample name	CK1	CK2	CK3	RBSDV1	RBSDV2	RBSDV3	RSV1	RSV2	RSV3
Total reads	63191578	62831734	62872142	64677702	60831668	61313444	65872136	59858846	61908346
Total mapped	60402111(95.59%)	59986021(95.47%)	59377771(94.44%)	61153412(94.55%)	51498473(84.66%)	48109560(78.46%)	63286997(96.08%)	56557738(94.49%)	57086065(92.21%)
Multiple mapped	1549271(2.45%)	1707966(2.72%)	1668033(2.65%)	1652342(2.55%)	1545403(2.54%)	1433807(2.34%)	1696704(2.58%)	1536016(2.57%)	1507683(2.44%)
Uniquely mapped	58852840(93.13%)	58278055(92.75%)	57709738(91.79%)	59501070(92.00%)	49953070(82.12%)	46675753(76.13%)	61590293(93.50%)	55021722(91.92%)	55578382(89.78%)
Read-1	29608384(46.85%)	29306889(46.64%)	29038345(46.19%)	29934461(46.28%)	25125513(41.30%)	23479598(38.29%)	30974382(47.02%)	27673522(46.23%)	27952052(45.15%)
Read-2	29244456(46.28%)	28971166(46.11%)	28671393(45.60%)	29566609(45.71%)	24827557(40.81%)	23196155(37.83%)	30615911(46.48%)	27348200(45.69%)	27626330(44.62%)
Read map to '+'	29418022(46.55%)	29126062(46.36%)	28840598(45.87%)	29744678(45.99%)	24968450(41.05%)	23332107(38.05%)	30785569(46.74%)	27499446(45.94%)	27780769(44.87%)
Read map to '-'	29434818(46.58)	29151993(46.40)	28869140(45.92)	29756392(46.01)	24984620(41.07)	23343646(38.07)	30804724(46.76)	27522276(45.98)	27797613(44.90)
Non-splice reads	42419151(67.13%)	43428956(69.12%)	43850065(69.74%)	45013842(69.60%)	40076116(65.88%)	36571201(59.65%)	44936369(68.22%)	40410475(67.51%)	40959274(66.16%)
Splice reads	16433689(26.01%)	14849099(23.63%)	13859673(22.04%)	14487228(22.40%)	9876954(16.24%)	10104552(16.48%)	16653924(25.28%)	14611247(24.41%)	14619108(23.61%)
Reads mapped in proper pairs	57023304(90.24%)	56415296(89.79%)	55470858(88.23%)	57747786(89.29%)	48047206(78.98%)	44838746(73.13%)	59937824(90.99%)	53323694(89.08%)	53985682(87.20%)
