# Supplementary material for: Transcriptional Landscape of Pathogen-responsive Lncrnas Reveals OS_LNC1812-Induced Disease Resistance by Abscisic Acid Pathway in Rice
Source: Research Square preprint supplement (doi:10.21203/rs.3.rs-244393/v1), 2021-03-01
Supplement: Supplementary file 3 [file 4b40169841871a252c7e9105.xlsx]

## Sheet: KEGG.filter.enrichment
#PathwayID	PathwayName	GenesName	S gene number	B gene number	Pvalue	Qvalue	PathwayLink
ko00130	Ubiquinone and other terpenoid-quinone biosynthesis	OS02T0302200-01|OS09T0361500-01|OS03T0152400-01|OS06T0345200-02|OS08T0448000-01|OS05T0320700-02|OS02T0177600-01|OS02T0302700-01	8	50	0.000171658	0.0345032	http://www.genome.jp/kegg-bin/show_pathway?ko00130/K02552%09red/K00487%09red/K00815%09red/K01904%09red
ko00360	Phenylalanine metabolism	OS02T0302200-01|OS09T0481400-01|OS03T0152400-01|OS06T0345200-02|OS08T0448000-01|OS05T0320700-02|OS05T0427400-00|OS02T0177600-01|OS02T0302700-01	9	73	0.000400041	0.0402042	http://www.genome.jp/kegg-bin/show_pathway?ko00360/K00588%09red/K00487%09red/K00815%09red/K01904%09red/K10775%09red
ko00480	Glutathione metabolism	OS01T0692100-01|OS10T0528100-01|OS01T0151500-00|OS04T0434800-02|OS10T0525400-01|OS01T0949750-00|OS09T0467200-01|OS03T0358100-01|OS01T0369700-03|OS10T0530900-01	10	120	0.00307743	0.123713	http://www.genome.jp/kegg-bin/show_pathway?ko00480/K00681%09red/K00432%09red/K00434%09red/K00799%09red
ko00940	Phenylpropanoid biosynthesis	OS04T0474800-02|OS01T0172600-01|OS07T0677100-01|OS02T0187800-01|OS01T0962700-01|OS09T0481400-01|OS03T0152400-01|OS08T0448000-01|OS09T0127300-01|OS01T0897600-01|OS05T0320700-02|OS05T0427400-00|OS02T0611800-01|OS08T0113000-01|OS02T0177600-01|OS01T0963000-04	16	268	0.0053132	0.130845	http://www.genome.jp/kegg-bin/show_pathway?ko00940/K13065%09red/K10775%09red/K01188%09red/K00083%09red/K01904%09red/K00430%09red/K00487%09red/K00588%09red/K09753%09red
ko04075	Plant hormone signal transduction	OS03T0633800-01|OS02T0766700-01|OS06T0714300-01|OS09T0325700-01|OS03T0742900-01|OS02T0643800-01|OS07T0580500-01|OS07T0129200-01|OS01T0867300-01|OS08T0428400-01|OS05T0437700-01|OS01T0808100-01|OS07T0615200-01|OS10T0571300-01|OS01T0190300-01|OS01T0178500-02|OS02T0194900-00	17	305	0.0077791	0.15636	http://www.genome.jp/kegg-bin/show_pathway?ko04075/K14484%09red/K14503%09red/K14432%09red/K14431%09red/K14500%09red/K14497%09red/K14488%09red/K13464%09red/K13449%09red
ko00520	Amino sugar and nucleotide sugar metabolism	OS03T0268400-01|OS12T0129350-00|OS03T0599800-01|OS07T0139400-01|OS12T0128700-01|OS11T0124900-01|OS10T0542900-01|OS12T0131100-01|OS06T0726200-02|OS01T0190400-01|OS09T0298200-01|OS04T0493400-01	12	187	0.00886974	0.162074	http://www.genome.jp/kegg-bin/show_pathway?ko00520/K00966%09red/K13648%09red/K00975%09red/K00844%09red/K20547%09red/K01183%09red/K13379%09red/K00820%09red/K12448%09red/K01209%09red
ko00400	Phenylalanine, tyrosine and tryptophan biosynthesis	OS02T0302200-01|OS04T0406600-01|OS06T0345200-02|OS03T0718000-01|OS06T0133900-01|OS02T0302700-01	6	64	0.0122057	0.188719	http://www.genome.jp/kegg-bin/show_pathway?ko00400/K01658%09red/K05359%09red/K00815%09red/K00800%09red
ko04626	Plant-pathogen interaction	OS02T0787300-01|OS01T0135700-01|OS03T0130900-02|OS01T0949300-01|OS04T0514600-00|OS04T0618700-01|OS03T0743500-02|OS12T0138050-00|OS03T0688300-01|OS07T0129200-01|OS11T0141400-01|OS01T0955100-01	12	217	0.0242392	0.348005	http://www.genome.jp/kegg-bin/show_pathway?ko04626/K13412%09red/K13413%09red/K13448%09red/K13449%09red/K13420%09red/K13459%09red/K13430%09red/K02183%09red
ko00941	Flavonoid biosynthesis	OS02T0611800-01|OS09T0481400-01|OS05T0320700-02|OS04T0630800-01	4	38	0.0273136	0.366003	http://www.genome.jp/kegg-bin/show_pathway?ko00941/K13065%09red/K00588%09red/K00487%09red/K08695%09red
ko00909	Sesquiterpenoid and triterpenoid biosynthesis	OS03T0184550-01|OS03T0231700-02	2	11	0.0477329	0.564372	http://www.genome.jp/kegg-bin/show_pathway?ko00909/K00511%09red/K15891%09red
ko00350	Tyrosine metabolism	OS06T0345200-02|OS11T0210500-01|OS02T0302200-01|OS06T0103300-01|OS02T0302700-01	5	72	0.0597844	0.667593	http://www.genome.jp/kegg-bin/show_pathway?ko00350/K00451%09red/K00815%09red/K18857%09red
ko00945	Stilbenoid, diarylheptanoid and gingerol biosynthesis	OS02T0611800-01|OS09T0481400-01|OS05T0320700-02	3	34	0.0798002	0.844202	http://www.genome.jp/kegg-bin/show_pathway?ko00945/K13065%09red/K00588%09red/K00487%09red
ko00592	alpha-Linolenic acid metabolism	OS11T0210500-01|OS03T0767000-01|OS05T0163700-01|OS10T0457600-01	4	64	0.115578	0.927268	http://www.genome.jp/kegg-bin/show_pathway?ko00592/K00232%09red/K07513%09red/K01723%09red/K18857%09red
ko00960	Tropane, piperidine and pyridine alkaloid biosynthesis	OS06T0345200-02|OS02T0302200-01|OS02T0302700-01	3	41	0.118673	0.927268	http://www.genome.jp/kegg-bin/show_pathway?ko00960/K00815%09red
ko00950	Isoquinoline alkaloid biosynthesis	OS06T0345200-02|OS02T0302200-01|OS02T0302700-01	3	42	0.124712	0.927268	http://www.genome.jp/kegg-bin/show_pathway?ko00950/K00815%09red
ko00051	Fructose and mannose metabolism	OS01T0118000-01|OS09T0415800-01|OS03T0268400-01|OS01T0190400-01|OS08T0120600-01	5	92	0.127036	0.927268	http://www.genome.jp/kegg-bin/show_pathway?ko00051/K00966%09red/K01623%09red/K00850%09red/K00844%09red
ko00760	Nicotinate and nicotinamide metabolism	OS04T0429800-01|OS09T0567900-01	2	22	0.139099	0.927268	http://www.genome.jp/kegg-bin/show_pathway?ko00760/K00763%09red/K01240%09red
ko00904	Diterpenoid biosynthesis	OS06T0599200-01|OS02T0569900-01|OS02T0570400-01	3	45	0.143463	0.927268	http://www.genome.jp/kegg-bin/show_pathway?ko00904/K16084%09red/K14036%09red
ko01040	Biosynthesis of unsaturated fatty acids	OS04T0271200-01|OS05T0163700-01|OS10T0457600-01	3	51	0.183424	0.927268	http://www.genome.jp/kegg-bin/show_pathway?ko01040/K00232%09red/K07513%09red/K10703%09red
ko01230	Biosynthesis of amino acids	OS08T0120600-01|OS02T0302200-01|OS04T0406600-01|OS03T0299900-01|OS09T0415800-01|OS06T0345200-02|OS08T0447000-01|OS03T0718000-01|OS06T0133900-01|OS01T0118000-01|OS01T0323600-01|OS04T0266900-01|OS02T0302700-01	13	345	0.184687	0.927268	http://www.genome.jp/kegg-bin/show_pathway?ko01230/K10206%09red/K00850%09red/K05359%09red/K01658%09red/K01623%09red/K00815%09red/K00615%09red/K00058%09red/K00789%09red/K00800%09red
ko00902	Monoterpenoid biosynthesis	OS02T0121700-01	1	7	0.199024	0.927268	http://www.genome.jp/kegg-bin/show_pathway?ko00902/K15086%09red
ko00944	Flavone and flavonol biosynthesis	OS08T0157500-01	1	7	0.199024	0.927268	http://www.genome.jp/kegg-bin/show_pathway?ko00944/K05279%09red
ko00030	Pentose phosphate pathway	OS01T0118000-01|OS04T0266900-01|OS09T0415800-01|OS08T0120600-01	4	85	0.226585	0.927268	http://www.genome.jp/kegg-bin/show_pathway?ko00030/K01623%09red/K00850%09red/K00615%09red
ko00561	Glycerolipid metabolism	OS11T0679700-01|OS11T0615000-01|OS01T0837200-01|OS05T0502200-01	4	89	0.250244	0.927268	http://www.genome.jp/kegg-bin/show_pathway?ko00561/K15728%09red/K13508%09red/K13513%09red/K01054%09red
ko04146	Peroxisome	OS03T0786000-01|OS05T0163700-01|OS01T0966100-01|OS12T0543600-00|OS10T0457600-01	5	122	0.267949	0.927268	http://www.genome.jp/kegg-bin/show_pathway?ko04146/K05677%09red/K00232%09red/K07513%09red/K13344%09red/K00306%09red
ko01212	Fatty acid metabolism	OS04T0271200-01|OS05T0163700-01|OS10T0457600-01|OS09T0277800-01	4	98	0.305082	0.927268	http://www.genome.jp/kegg-bin/show_pathway?ko01212/K10703%09red/K00232%09red/K07513%09red/K00208%09red
ko00071	Fatty acid degradation	OS11T0210500-01|OS05T0163700-01|OS10T0457600-01	3	69	0.31492	0.927268	http://www.genome.jp/kegg-bin/show_pathway?ko00071/K00232%09red/K07513%09red/K18857%09red
ko00010	Glycolysis / Gluconeogenesis	OS08T0120600-01|OS09T0509200-01|OS06T0499900-01|OS11T0210500-01|OS01T0190400-01|OS01T0118000-01|OS09T0415800-01	7	196	0.320946	0.927268	http://www.genome.jp/kegg-bin/show_pathway?ko00010/K00850%09red/K00844%09red/K00162%09red/K01623%09red/K18857%09red/K00627%09red
ko00900	Terpenoid backbone biosynthesis	OS12T0105500-01|OS03T0184550-01|OS09T0492700-01	3	70	0.32244	0.927268	http://www.genome.jp/kegg-bin/show_pathway?ko00900/K15892%09red/K15891%09red/K00021%09red
ko00062	Fatty acid elongation	OS04T0271200-01|OS06T0598800-01	2	42	0.339752	0.927268	http://www.genome.jp/kegg-bin/show_pathway?ko00062/K10703%09red/K15397%09red
ko00052	Galactose metabolism	OS09T0415800-01|OS03T0316200-01|OS01T0190400-01	3	74	0.352498	0.927268	http://www.genome.jp/kegg-bin/show_pathway?ko00052/K18819%09red/K00850%09red/K00844%09red
ko00531	Glycosaminoglycan degradation	OS05T0155700-01	1	15	0.358493	0.927268	http://www.genome.jp/kegg-bin/show_pathway?ko00531/K10532%09red
ko00460	Cyanoamino acid metabolism	OS04T0474800-02|OS01T0897600-01|OS01T0151500-00	3	76	0.367476	0.927268	http://www.genome.jp/kegg-bin/show_pathway?ko00460/K00681%09red/K01188%09red
ko04130	SNARE interactions in vesicular transport	OS08T0563300-01|OS01T0866300-01	2	46	0.379428	0.927268	http://www.genome.jp/kegg-bin/show_pathway?ko04130/K08504%09red/K08516%09red
ko00260	Glycine, serine and threonine metabolism	OS04T0107200-01|OS08T0447000-01|OS12T0543600-00|OS06T0667600-01	4	111	0.385909	0.927268	http://www.genome.jp/kegg-bin/show_pathway?ko00260/K00306%09red/K02437%09red/K00058%09red/K15919%09red
ko00590	Arachidonic acid metabolism	OS03T0358100-01	1	19	0.425912	0.927268	http://www.genome.jp/kegg-bin/show_pathway?ko00590/K00432%09red
ko00780	Biotin metabolism	OS09T0277800-01	1	21	0.45692	0.927268	http://www.genome.jp/kegg-bin/show_pathway?ko00780/K00208%09red
ko03420	Nucleotide excision repair	OS01T0846000-01|OS01T0685500-01|OS06T0264300-01	3	90	0.469633	0.927268	http://www.genome.jp/kegg-bin/show_pathway?ko03420/K10747%09red/K07466%09red/K10839%09red
ko00300	Lysine biosynthesis	OS03T0299900-01	1	22	0.471792	0.927268	http://www.genome.jp/kegg-bin/show_pathway?ko00300/K10206%09red
ko03430	Mismatch repair	OS01T0846000-01|OS01T0685500-01	2	56	0.473617	0.927268	http://www.genome.jp/kegg-bin/show_pathway?ko03430/K10747%09red/K07466%09red
ko00510	N-Glycan biosynthesis	OS06T0564800-01|OS02T0467700-01	2	57	0.482563	0.927268	http://www.genome.jp/kegg-bin/show_pathway?ko00510/K03842%09red/K07432%09red
ko00230	Purine metabolism	OS04T0504000-01|OS02T0625500-01|OS10T0457500-01|OS12T0236400-01|OS03T0845700-01|OS12T0597500-02	6	199	0.491369	0.927268	http://www.genome.jp/kegg-bin/show_pathway?ko00230/K00856%09red/K01519%09red/K00759%09red/K03016%09red/K00939%09red/K18151%09red
ko04120	Ubiquitin mediated proteolysis	OS09T0272900-01|OS01T0233900-01|OS11T0497000-01|OS05T0460200-01|OS03T0726900-02	5	165	0.498328	0.927268	http://www.genome.jp/kegg-bin/show_pathway?ko04120/K03094%09red/K10581%09red/K10575%09red/K10684%09red/K10606%09red
ko00053	Ascorbate and aldarate metabolism	OS08T0557600-01|OS04T0434800-02	2	59	0.500168	0.927268	http://www.genome.jp/kegg-bin/show_pathway?ko00053/K08232%09red/K00434%09red
ko00430	Taurine and hypotaurine metabolism	OS01T0151500-00	1	24	0.500326	0.927268	http://www.genome.jp/kegg-bin/show_pathway?ko00430/K00681%09red
ko00564	Glycerophospholipid metabolism	OS11T0679700-01|OS11T0615000-01|OS05T0502200-01|OS10T0524400-01	4	133	0.518378	0.927268	http://www.genome.jp/kegg-bin/show_pathway?ko00564/K15728%09red/K13508%09red/K13513%09red/K01115%09red
ko00710	Carbon fixation in photosynthetic organisms	OS01T0118000-01|OS08T0120600-01|OS04T0266900-01|OS02T0152400-01	4	135	0.5298	0.927268	http://www.genome.jp/kegg-bin/show_pathway?ko00710/K01623%09red/K01602%09red/K00615%09red
ko00591	Linoleic acid metabolism	OS03T0699700-01	1	27	0.540268	0.927268	http://www.genome.jp/kegg-bin/show_pathway?ko00591/K15718%09red
ko00280	Valine, leucine and isoleucine degradation	OS06T0677400-01|OS10T0457600-01	2	66	0.558664	0.927268	http://www.genome.jp/kegg-bin/show_pathway?ko00280/K07513%09red/K00020%09red
ko00270	Cysteine and methionine metabolism	OS06T0345200-02|OS02T0302200-01|OS01T0323600-01|OS02T0302700-01	4	148	0.600553	0.927268	http://www.genome.jp/kegg-bin/show_pathway?ko00270/K00789%09red/K00815%09red
ko00195	Photosynthesis	OS03T0835900-01|OS04T0690800-01	2	73	0.612118	0.927268	http://www.genome.jp/kegg-bin/show_pathway?ko00195/K02639%09red/K03542%09red
ko03030	DNA replication	OS01T0846000-01|OS01T0685500-01	2	74	0.619338	0.927268	http://www.genome.jp/kegg-bin/show_pathway?ko03030/K10747%09red/K07466%09red
ko00240	Pyrimidine metabolism	OS03T0845700-01|OS10T0457500-01|OS06T0203500-01|OS09T0567900-01	4	152	0.620992	0.927268	http://www.genome.jp/kegg-bin/show_pathway?ko00240/K01519%09red/K03016%09red/K01240%09red/K13800%09red
ko04141	Protein processing in endoplasmic reticulum	OS09T0272900-01|OS06T0264300-01|OS06T0163500-01|OS03T0266900-02|OS07T0657200-02|OS01T0895600-01|OS03T0267000-00|OS05T0460200-01	8	310	0.644231	0.927268	http://www.genome.jp/kegg-bin/show_pathway?ko04141/K08057%09red/K08653%09red/K03094%09red/K10575%09red/K10839%09red/K13993%09red/K14005%09red
ko00630	Glyoxylate and dicarboxylate metabolism	OS04T0107200-01|OS06T0667600-01|OS02T0152400-01	3	119	0.652442	0.927268	http://www.genome.jp/kegg-bin/show_pathway?ko00630/K02437%09red/K01602%09red/K15919%09red
ko04145	Phagosome	OS04T0643100-02|OS10T0184300-01|OS01T0895600-01	3	123	0.673796	0.927268	http://www.genome.jp/kegg-bin/show_pathway?ko04145/K02149%09red/K02154%09red/K08057%09red
ko00500	Starch and sucrose metabolism	OS02T0139300-01|OS11T0124900-01|OS01T0897600-01|OS01T0190400-01|OS02T0661100-01|OS04T0474800-02|OS09T0298200-01	7	285	0.690193	0.927268	http://www.genome.jp/kegg-bin/show_pathway?ko00500/K19893%09red/K00975%09red/K00844%09red/K01188%09red/K13648%09red/K01087%09red
ko00020	Citrate cycle (TCA cycle)	OS09T0509200-01|OS06T0499900-01	2	85	0.691985	0.927268	http://www.genome.jp/kegg-bin/show_pathway?ko00020/K00627%09red/K00162%09red
ko01200	Carbon metabolism	OS08T0120600-01|OS04T0107200-01|OS04T0266900-01|OS09T0509200-01|OS08T0447000-01|OS01T0190400-01|OS06T0499900-01|OS02T0152400-01|OS01T0118000-01|OS09T0415800-01	10	408	0.710515	0.927268	http://www.genome.jp/kegg-bin/show_pathway?ko01200/K00850%09red/K15919%09red/K00844%09red/K00162%09red/K01623%09red/K01602%09red/K00615%09red/K00058%09red/K00627%09red
ko03015	mRNA surveillance pathway	OS09T0569400-01|OS05T0543300-01|OS03T0167700-01|OS08T0180000-02	4	172	0.712897	0.927268	http://www.genome.jp/kegg-bin/show_pathway?ko03015/K04382%09red/K14402%09red/K00565%09red/K14962%09red
ko00565	Ether lipid metabolism	OS10T0524400-01	1	44	0.713336	0.927268	http://www.genome.jp/kegg-bin/show_pathway?ko00565/K01115%09red
ko03010	Ribosome	OS05T0243100-01|OS03T0379500-01|OS02T0235600-01|OS05T0452600-01|OS02T0796900-00|OS10T0407100-01|OS01T0100700-01|OS07T0523300-01|OS03T0141000-01	9	371	0.715542	0.927268	http://www.genome.jp/kegg-bin/show_pathway?ko03010/K02929%09red/K02889%09red/K02871%09red/K02924%09red/K02913%09red/K02911%09red/K02868%09red/K02997%09red/K02989%09red
ko03020	RNA polymerase	OS03T0845700-01	1	46	0.728838	0.927268	http://www.genome.jp/kegg-bin/show_pathway?ko03020/K03016%09red
ko02010	ABC transporters	OS01T0966100-01	1	46	0.728838	0.927268	http://www.genome.jp/kegg-bin/show_pathway?ko02010/K05677%09red
ko00910	Nitrogen metabolism	OS08T0470200-02	1	47	0.736272	0.927268	http://www.genome.jp/kegg-bin/show_pathway?ko00910/K01674%09red
ko00310	Lysine degradation	OS12T0543600-00	1	47	0.736272	0.927268	http://www.genome.jp/kegg-bin/show_pathway?ko00310/K00306%09red
ko00100	Steroid biosynthesis	OS03T0231700-02	1	48	0.743503	0.927268	http://www.genome.jp/kegg-bin/show_pathway?ko00100/K00511%09red
ko00061	Fatty acid biosynthesis	OS09T0277800-01	1	51	0.764029	0.927268	http://www.genome.jp/kegg-bin/show_pathway?ko00061/K00208%09red
ko00920	Sulfur metabolism	OS01T0667200-02	1	51	0.764029	0.927268	http://www.genome.jp/kegg-bin/show_pathway?ko00920/K17725%09red
ko03410	Base excision repair	OS01T0685500-01	1	55	0.78887	0.927268	http://www.genome.jp/kegg-bin/show_pathway?ko03410/K10747%09red
ko00380	Tryptophan metabolism	OS10T0138100-01	1	67	0.848793	0.9761	http://www.genome.jp/kegg-bin/show_pathway?ko00380/K11817%09red
ko00250	Alanine, aspartate and glutamate metabolism	OS12T0131100-01	1	70	0.860904	0.9761	http://www.genome.jp/kegg-bin/show_pathway?ko00250/K00820%09red
ko03440	Homologous recombination	OS01T0846000-01	1	71	0.864722	0.9761	http://www.genome.jp/kegg-bin/show_pathway?ko03440/K07466%09red
ko03060	Protein export	OS05T0509500-01	1	74	0.875559	0.9761	http://www.genome.jp/kegg-bin/show_pathway?ko03060/K03106%09red
ko00562	Inositol phosphate metabolism	OS03T0192700-01	1	79	0.891729	0.979724	http://www.genome.jp/kegg-bin/show_pathway?ko00562/K01858%09red
ko00620	Pyruvate metabolism	OS09T0509200-01|OS06T0499900-01	2	137	0.896862	0.979724	http://www.genome.jp/kegg-bin/show_pathway?ko00620/K00627%09red/K00162%09red
ko00330	Arginine and proline metabolism	OS04T0466600-01	1	87	0.913353	0.987455	http://www.genome.jp/kegg-bin/show_pathway?ko00330/K10536%09red
ko03050	Proteasome	OS02T0784700-00	1	96	0.932569	0.987455	http://www.genome.jp/kegg-bin/show_pathway?ko03050/K03061%09red
ko03018	RNA degradation	OS08T0270200-01|OS09T0415800-01	2	159	0.937123	0.987455	http://www.genome.jp/kegg-bin/show_pathway?ko03018/K12592%09red/K00850%09red
ko04070	Phosphatidylinositol signaling system	OS03T0743500-02	1	99	0.937977	0.987455	http://www.genome.jp/kegg-bin/show_pathway?ko04070/K02183%09red
ko00190	Oxidative phosphorylation	OS04T0643100-02|OS10T0184300-01	2	164	0.943921	0.987455	http://www.genome.jp/kegg-bin/show_pathway?ko00190/K02149%09red/K02154%09red
ko03008	Ribosome biogenesis in eukaryotes	OS04T0303950-01	1	119	0.964489	0.992939	http://www.genome.jp/kegg-bin/show_pathway?ko03008/K13288%09red
ko04144	Endocytosis	OS06T0247800-01|OS10T0524400-01	2	236	0.989834	0.999352	http://www.genome.jp/kegg-bin/show_pathway?ko04144/K01528%09red/K01115%09red
ko03040	Spliceosome	OS02T0831300-01|OS03T0344100-02	2	286	0.997041	0.999352	http://www.genome.jp/kegg-bin/show_pathway?ko03040/K12864%09red/K12890%09red
ko03013	RNA transport	OS09T0363600-01	1	262	0.999352	0.999352	http://www.genome.jp/kegg-bin/show_pathway?ko03013/K13175%09red
