# Supplementary material for: Transcriptional Landscape of Pathogen-responsive Lncrnas Reveals OS_LNC1812-Induced Disease Resistance by Abscisic Acid Pathway in Rice
Source: Research Square preprint supplement (doi:10.21203/rs.3.rs-244393/v1), 2021-03-01
Supplement: Supplementary file 4 [file 5094bf7da552cd0ff6d44afa.xlsx]

## Sheet: Table S4
lncRNA_ID	lncRNA_name	direction	type	distance (bp)	subtype	location
MSTRG.10083.1	OS_LNC0001	antisense	genic	0	containing	exonic
MSTRG.10179.1	OS_LNC0002	antisense	genic	0	containing	exonic
MSTRG.10252.3	OS_LNC0003	sense	genic	0	containing	exonic
MSTRG.1026.1	OS_LNC0004	sense	genic	0	containing	exonic
MSTRG.10293.1	OS_LNC0005	sense	genic	0	containing	exonic
MSTRG.10293.12	OS_LNC0006	sense	genic	0	containing	exonic
MSTRG.10293.13	OS_LNC0007	sense	genic	0	containing	exonic
MSTRG.10293.2	OS_LNC0008	sense	genic	0	containing	exonic
MSTRG.10293.4	OS_LNC0009	sense	genic	0	containing	exonic
MSTRG.10293.6	OS_LNC0010	sense	genic	0	containing	exonic
MSTRG.10293.8	OS_LNC0011	sense	genic	0	overlapping	exonic
MSTRG.10304.2	OS_LNC0012	sense	intergenic	2134	same_strand	downstream
MSTRG.10360.1	OS_LNC0013	antisense	genic	0	overlapping	exonic
MSTRG.10390.1	OS_LNC0014	antisense	intergenic	12485	divergent	upstream
MSTRG.10436.1	OS_LNC0015	antisense	intergenic	1585	divergent	upstream
MSTRG.10440.1	OS_LNC0016	sense	intergenic	4443	same_strand	upstream
MSTRG.10440.2	OS_LNC0017	sense	intergenic	4443	same_strand	upstream
MSTRG.10440.3	OS_LNC0018	sense	intergenic	4443	same_strand	upstream
MSTRG.10444.1	OS_LNC0019	antisense	intergenic	4127	convergent	downstream
MSTRG.10483.1	OS_LNC0020	antisense	intergenic	3089	divergent	upstream
MSTRG.10538.1	OS_LNC0021	sense	intergenic	54	same_strand	downstream
MSTRG.10538.2	OS_LNC0022	sense	intergenic	54	same_strand	downstream
MSTRG.10538.3	OS_LNC0023	sense	intergenic	450	same_strand	downstream
MSTRG.10568.1	OS_LNC0024	sense	genic	0	overlapping	exonic
MSTRG.10580.2	OS_LNC0025	antisense	genic	0	overlapping	exonic
MSTRG.10587.1	OS_LNC0026	sense	genic	0	overlapping	exonic
MSTRG.10590.2	OS_LNC0027	sense	genic	0	overlapping	exonic
MSTRG.106.2	OS_LNC0028	sense	genic	0	containing	exonic
MSTRG.10607.1	OS_LNC0029	sense	intergenic	815	same_strand	upstream
MSTRG.10607.3	OS_LNC0030	sense	intergenic	815	same_strand	upstream
MSTRG.10610.1	OS_LNC0031	antisense	intergenic	2223	convergent	downstream
MSTRG.10647.1	OS_LNC0032	sense	genic	0	containing	exonic
MSTRG.10667.1	OS_LNC0033	antisense	genic	0	containing	exonic
MSTRG.10669.2	OS_LNC0034	antisense	genic	0	containing	intronic
MSTRG.10714.1	OS_LNC0035	sense	intergenic	274	same_strand	upstream
MSTRG.10740.1	OS_LNC0036	sense	intergenic	53087	same_strand	upstream
MSTRG.10757.2	OS_LNC0037	sense	genic	0	nested	exonic
MSTRG.10763.5	OS_LNC0038	sense	genic	0	containing	exonic
MSTRG.10863.1	OS_LNC0039	sense	intergenic	21943	same_strand	downstream
MSTRG.10872.1	OS_LNC0040	sense	intergenic	4636	same_strand	upstream
MSTRG.10890.2	OS_LNC0041	sense	genic	0	nested	exonic
MSTRG.10894.4	OS_LNC0042	sense	intergenic	368	same_strand	downstream
MSTRG.11043.4	OS_LNC0043	sense	genic	0	nested	exonic
MSTRG.11047.1	OS_LNC0044	sense	genic	0	containing	exonic
MSTRG.11047.4	OS_LNC0045	sense	genic	0	containing	exonic
MSTRG.11066.2	OS_LNC0046	sense	genic	0	containing	exonic
MSTRG.11066.4	OS_LNC0047	sense	intergenic	5526	same_strand	upstream
MSTRG.11105.1	OS_LNC0048	sense	genic	0	containing	exonic
MSTRG.11133.1	OS_LNC0049	sense	intergenic	34477	same_strand	downstream
MSTRG.11134.1	OS_LNC0050	sense	intergenic	38877	same_strand	downstream
MSTRG.11147.1	OS_LNC0051	sense	intergenic	19204	same_strand	downstream
MSTRG.11157.2	OS_LNC0052	sense	intergenic	822	same_strand	upstream
MSTRG.11161.5	OS_LNC0053	sense	genic	0	nested	exonic
MSTRG.11187.1	OS_LNC0054	antisense	intergenic	4300	convergent	downstream
MSTRG.11200.2	OS_LNC0055	sense	genic	0	overlapping	exonic
MSTRG.11201.2	OS_LNC0056	sense	genic	0	containing	exonic
MSTRG.11229.2	OS_LNC0057	sense	genic	0	nested	exonic
MSTRG.1123.3	OS_LNC0058	antisense	genic	0	containing	intronic
MSTRG.11239.4	OS_LNC0059	antisense	genic	0	overlapping	exonic
MSTRG.11241.1	OS_LNC0060	antisense	intergenic	2078	convergent	downstream
MSTRG.11314.1	OS_LNC0061	antisense	intergenic	9156	convergent	downstream
MSTRG.11384.1	OS_LNC0062	sense	genic	0	nested	exonic
MSTRG.1140.1	OS_LNC0063	antisense	genic	0	nested	exonic
MSTRG.11411.1	OS_LNC0064	sense	genic	0	containing	exonic
MSTRG.11455.4	OS_LNC0065	sense	genic	0	nested	exonic
MSTRG.11458.1	OS_LNC0066	antisense	genic	0	nested	exonic
MSTRG.11469.1	OS_LNC0067	sense	intergenic	5206	same_strand	upstream
MSTRG.11536.1	OS_LNC0068	antisense	genic	0	overlapping	exonic
MSTRG.11537.2	OS_LNC0069	sense	genic	0	containing	exonic
MSTRG.11575.1	OS_LNC0070	sense	genic	0	containing	intronic
MSTRG.1167.1	OS_LNC0071	antisense	intergenic	14054	convergent	downstream
MSTRG.11678.1	OS_LNC0072	sense	intergenic	2185	same_strand	downstream
MSTRG.11686.2	OS_LNC0073	sense	genic	0	nested	exonic
MSTRG.11693.10	OS_LNC0074	sense	intergenic	2527	same_strand	upstream
MSTRG.11693.13	OS_LNC0075	sense	intergenic	2527	same_strand	upstream
MSTRG.11693.8	OS_LNC0076	sense	intergenic	2527	same_strand	upstream
MSTRG.11693.9	OS_LNC0077	sense	intergenic	2527	same_strand	upstream
MSTRG.11756.2	OS_LNC0078	antisense	intergenic	145	divergent	upstream
MSTRG.11756.3	OS_LNC0079	antisense	intergenic	145	divergent	upstream
MSTRG.11756.5	OS_LNC0080	antisense	intergenic	328	divergent	upstream
MSTRG.11764.1	OS_LNC0081	sense	intergenic	1203	same_strand	downstream
MSTRG.11794.1	OS_LNC0082	sense	intergenic	11768	same_strand	upstream
MSTRG.11794.2	OS_LNC0083	sense	intergenic	11768	same_strand	upstream
MSTRG.11809.2	OS_LNC0084	sense	genic	0	overlapping	exonic
MSTRG.11809.3	OS_LNC0085	sense	genic	0	overlapping	exonic
MSTRG.11832.1	OS_LNC0086	antisense	genic	0	overlapping	exonic
MSTRG.11834.1	OS_LNC0087	antisense	genic	0	nested	exonic
MSTRG.11857.1	OS_LNC0088	sense	intergenic	2371	same_strand	upstream
MSTRG.11860.1	OS_LNC0089	sense	intergenic	13466	same_strand	upstream
MSTRG.1187.1	OS_LNC0090	antisense	intergenic	28	convergent	downstream
MSTRG.1192.1	OS_LNC0091	sense	genic	0	containing	exonic
MSTRG.11929.5	OS_LNC0092	sense	intergenic	2615	same_strand	upstream
MSTRG.11929.6	OS_LNC0093	sense	genic	0	containing	exonic
MSTRG.11929.8	OS_LNC0094	sense	genic	0	containing	exonic
MSTRG.11948.1	OS_LNC0095	sense	genic	0	containing	exonic
MSTRG.11978.1	OS_LNC0096	sense	genic	0	containing	exonic
MSTRG.11986.1	OS_LNC0097	sense	intergenic	16744	same_strand	downstream
MSTRG.12020.1	OS_LNC0098	antisense	intergenic	12298	divergent	upstream
MSTRG.12034.1	OS_LNC0099	sense	intergenic	1841	same_strand	upstream
MSTRG.12034.2	OS_LNC0100	sense	intergenic	3084	same_strand	upstream
MSTRG.12061.1	OS_LNC0101	sense	genic	0	overlapping	exonic
MSTRG.12084.1	OS_LNC0102	sense	genic	0	overlapping	exonic
MSTRG.12110.1	OS_LNC0103	sense	intergenic	7303	same_strand	downstream
MSTRG.12112.3	OS_LNC0104	sense	genic	0	overlapping	exonic
MSTRG.12112.4	OS_LNC0105	sense	genic	0	overlapping	exonic
MSTRG.12113.2	OS_LNC0106	antisense	genic	0	nested	exonic
MSTRG.12135.2	OS_LNC0107	sense	genic	0	containing	exonic
MSTRG.12238.1	OS_LNC0108	antisense	intergenic	545	convergent	downstream
MSTRG.12270.1	OS_LNC0109	antisense	genic	0	overlapping	exonic
MSTRG.12299.4	OS_LNC0110	sense	genic	0	containing	exonic
MSTRG.12299.6	OS_LNC0111	sense	genic	0	overlapping	exonic
MSTRG.12356.1	OS_LNC0112	antisense	intergenic	300	divergent	upstream
MSTRG.12358.3	OS_LNC0113	antisense	genic	0	containing	intronic
MSTRG.12360.1	OS_LNC0114	sense	intergenic	15444	same_strand	upstream
MSTRG.12373.6	OS_LNC0115	sense	genic	0	containing	exonic
MSTRG.12379.2	OS_LNC0116	antisense	intergenic	26637	convergent	downstream
MSTRG.12404.1	OS_LNC0117	antisense	intergenic	11410	divergent	upstream
MSTRG.12404.2	OS_LNC0118	antisense	intergenic	11517	divergent	upstream
MSTRG.12426.1	OS_LNC0119	sense	intergenic	3246	same_strand	downstream
MSTRG.12438.1	OS_LNC0120	antisense	genic	0	overlapping	exonic
MSTRG.12441.2	OS_LNC0121	sense	genic	0	overlapping	exonic
MSTRG.12442.1	OS_LNC0122	antisense	intergenic	17832	divergent	upstream
MSTRG.12473.5	OS_LNC0123	sense	genic	0	nested	exonic
MSTRG.12527.2	OS_LNC0124	antisense	intergenic	4913	convergent	downstream
MSTRG.12541.1	OS_LNC0125	sense	genic	0	containing	exonic
MSTRG.12575.1	OS_LNC0126	antisense	intergenic	6061	convergent	downstream
MSTRG.12575.2	OS_LNC0127	antisense	intergenic	6077	convergent	downstream
MSTRG.12608.1	OS_LNC0128	antisense	genic	0	overlapping	exonic
MSTRG.12612.2	OS_LNC0129	sense	genic	0	nested	exonic
MSTRG.12618.2	OS_LNC0130	sense	genic	0	containing	exonic
MSTRG.12739.1	OS_LNC0131	antisense	genic	0	overlapping	exonic
MSTRG.12747.1	OS_LNC0132	sense	intergenic	4320	same_strand	upstream
MSTRG.12768.1	OS_LNC0133	sense	intergenic	433	same_strand	upstream
MSTRG.12793.14	OS_LNC0134	antisense	genic	0	overlapping	exonic
MSTRG.12798.1	OS_LNC0135	sense	intergenic	366	same_strand	downstream
MSTRG.12835.1	OS_LNC0136	sense	intergenic	19207	same_strand	downstream
MSTRG.12835.2	OS_LNC0137	sense	intergenic	19207	same_strand	downstream
MSTRG.12835.3	OS_LNC0138	sense	intergenic	19207	same_strand	downstream
MSTRG.12836.1	OS_LNC0139	antisense	intergenic	1660	divergent	upstream
MSTRG.12884.1	OS_LNC0140	antisense	intergenic	588	divergent	upstream
MSTRG.12884.3	OS_LNC0141	antisense	intergenic	746	divergent	upstream
MSTRG.12897.1	OS_LNC0142	antisense	genic	0	nested	exonic
MSTRG.12897.2	OS_LNC0143	antisense	genic	0	nested	exonic
MSTRG.12897.3	OS_LNC0144	antisense	genic	0	nested	exonic
MSTRG.12898.4	OS_LNC0145	antisense	genic	0	overlapping	exonic
MSTRG.12898.5	OS_LNC0146	antisense	genic	0	overlapping	exonic
MSTRG.12966.2	OS_LNC0147	sense	genic	0	containing	exonic
MSTRG.12966.3	OS_LNC0148	sense	genic	0	overlapping	exonic
MSTRG.12971.1	OS_LNC0149	antisense	intergenic	53	divergent	upstream
MSTRG.1298.1	OS_LNC0150	sense	intergenic	1783	same_strand	upstream
MSTRG.12999.1	OS_LNC0151	antisense	genic	0	overlapping	exonic
MSTRG.13001.10	OS_LNC0152	antisense	genic	0	overlapping	exonic
MSTRG.13001.11	OS_LNC0153	antisense	genic	0	overlapping	exonic
MSTRG.13001.13	OS_LNC0154	antisense	genic	0	overlapping	exonic
MSTRG.13001.18	OS_LNC0155	antisense	genic	0	overlapping	exonic
MSTRG.13001.4	OS_LNC0156	antisense	genic	0	overlapping	exonic
MSTRG.13001.7	OS_LNC0157	antisense	genic	0	overlapping	exonic
MSTRG.13001.8	OS_LNC0158	antisense	genic	0	overlapping	exonic
MSTRG.13001.9	OS_LNC0159	antisense	genic	0	overlapping	exonic
MSTRG.1302.2	OS_LNC0160	sense	genic	0	containing	exonic
MSTRG.13027.1	OS_LNC0161	sense	genic	0	containing	exonic
MSTRG.13098.1	OS_LNC0162	sense	genic	0	containing	exonic
MSTRG.13103.1	OS_LNC0163	sense	intergenic	4371	same_strand	upstream
MSTRG.1311.1	OS_LNC0164	antisense	intergenic	4885	divergent	upstream
MSTRG.13117.1	OS_LNC0165	antisense	genic	0	overlapping	exonic
MSTRG.13151.1	OS_LNC0166	antisense	genic	0	overlapping	exonic
MSTRG.13173.1	OS_LNC0167	sense	intergenic	2086	same_strand	downstream
MSTRG.13228.7	OS_LNC0168	sense	genic	0	overlapping	exonic
MSTRG.13253.1	OS_LNC0169	antisense	genic	0	overlapping	exonic
MSTRG.13282.3	OS_LNC0170	sense	intergenic	2051	same_strand	downstream
MSTRG.13282.4	OS_LNC0171	sense	intergenic	2051	same_strand	downstream
MSTRG.13282.5	OS_LNC0172	sense	intergenic	2051	same_strand	downstream
MSTRG.13282.6	OS_LNC0173	sense	intergenic	960	same_strand	downstream
MSTRG.13289.1	OS_LNC0174	antisense	genic	0	overlapping	exonic
MSTRG.13334.6	OS_LNC0175	sense	genic	0	overlapping	exonic
MSTRG.13350.1	OS_LNC0176	sense	genic	0	containing	exonic
MSTRG.13472.3	OS_LNC0177	sense	genic	0	overlapping	exonic
MSTRG.13493.2	OS_LNC0178	sense	genic	0	nested	exonic
MSTRG.13638.17	OS_LNC0179	sense	genic	0	containing	exonic
MSTRG.13638.19	OS_LNC0180	sense	genic	0	containing	exonic
MSTRG.13638.2	OS_LNC0181	sense	genic	0	containing	exonic
MSTRG.13638.20	OS_LNC0182	sense	genic	0	containing	exonic
MSTRG.13638.21	OS_LNC0183	sense	genic	0	containing	exonic
MSTRG.13638.3	OS_LNC0184	sense	genic	0	containing	exonic
MSTRG.13638.4	OS_LNC0185	sense	genic	0	containing	exonic
MSTRG.13638.5	OS_LNC0186	sense	genic	0	containing	exonic
MSTRG.13638.6	OS_LNC0187	sense	genic	0	containing	exonic
MSTRG.13638.7	OS_LNC0188	sense	genic	0	containing	exonic
MSTRG.13638.8	OS_LNC0189	sense	genic	0	containing	exonic
MSTRG.13656.2	OS_LNC0190	sense	genic	0	overlapping	exonic
MSTRG.13675.1	OS_LNC0191	sense	intergenic	9757	same_strand	downstream
MSTRG.13716.4	OS_LNC0192	sense	genic	0	containing	exonic
MSTRG.13716.5	OS_LNC0193	sense	genic	0	containing	exonic
MSTRG.13754.1	OS_LNC0194	sense	intergenic	16815	same_strand	downstream
MSTRG.13784.1	OS_LNC0195	antisense	intergenic	3510	divergent	upstream
MSTRG.13805.1	OS_LNC0196	sense	genic	0	overlapping	exonic
MSTRG.13807.1	OS_LNC0197	sense	genic	0	overlapping	exonic
MSTRG.13822.1	OS_LNC0198	sense	intergenic	1007	same_strand	downstream
MSTRG.13828.2	OS_LNC0199	antisense	intergenic	1584	convergent	downstream
MSTRG.13828.3	OS_LNC0200	antisense	intergenic	2031	divergent	upstream
MSTRG.13891.1	OS_LNC0201	antisense	genic	0	overlapping	exonic
MSTRG.13904.1	OS_LNC0202	antisense	intergenic	20	convergent	downstream
MSTRG.13908.2	OS_LNC0203	antisense	intergenic	2087	divergent	upstream
MSTRG.13926.6	OS_LNC0204	sense	intergenic	618	same_strand	upstream
MSTRG.13944.1	OS_LNC0205	sense	genic	0	containing	intronic
MSTRG.13976.1	OS_LNC0206	antisense	genic	0	overlapping	exonic
MSTRG.13982.1	OS_LNC0207	antisense	intergenic	382	convergent	downstream
MSTRG.13987.1	OS_LNC0208	sense	genic	0	containing	exonic
MSTRG.13987.2	OS_LNC0209	sense	genic	0	containing	exonic
MSTRG.13987.3	OS_LNC0210	sense	genic	0	containing	exonic
MSTRG.13987.4	OS_LNC0211	sense	genic	0	containing	exonic
MSTRG.13987.6	OS_LNC0212	sense	genic	0	containing	exonic
MSTRG.13987.8	OS_LNC0213	sense	genic	0	containing	exonic
MSTRG.14126.1	OS_LNC0214	antisense	genic	0	overlapping	exonic
MSTRG.14127.1	OS_LNC0215	antisense	genic	0	overlapping	exonic
MSTRG.14128.1	OS_LNC0216	antisense	genic	0	overlapping	exonic
MSTRG.14129.1	OS_LNC0217	sense	genic	0	containing	intronic
MSTRG.14141.1	OS_LNC0218	antisense	genic	0	overlapping	exonic
MSTRG.14165.1	OS_LNC0219	sense	intergenic	9191	same_strand	upstream
MSTRG.14192.2	OS_LNC0220	antisense	intergenic	14702	convergent	downstream
MSTRG.14210.1	OS_LNC0221	antisense	genic	0	overlapping	exonic
MSTRG.14275.1	OS_LNC0222	sense	genic	0	nested	intronic
MSTRG.14290.1	OS_LNC0223	antisense	genic	0	nested	intronic
MSTRG.14293.2	OS_LNC0224	sense	genic	0	containing	exonic
MSTRG.14300.1	OS_LNC0225	sense	intergenic	530	same_strand	downstream
MSTRG.14338.1	OS_LNC0226	sense	genic	0	containing	exonic
MSTRG.14338.10	OS_LNC0227	sense	genic	0	containing	exonic
MSTRG.14338.20	OS_LNC0228	sense	genic	0	containing	exonic
MSTRG.14338.23	OS_LNC0229	sense	genic	0	containing	exonic
MSTRG.14338.25	OS_LNC0230	sense	genic	0	containing	exonic
MSTRG.14338.26	OS_LNC0231	sense	genic	0	containing	exonic
MSTRG.14338.29	OS_LNC0232	sense	genic	0	containing	exonic
MSTRG.14338.3	OS_LNC0233	sense	genic	0	containing	exonic
MSTRG.14338.37	OS_LNC0234	sense	genic	0	containing	exonic
MSTRG.14338.41	OS_LNC0235	sense	genic	0	containing	exonic
MSTRG.14338.44	OS_LNC0236	sense	genic	0	containing	exonic
MSTRG.14338.45	OS_LNC0237	sense	genic	0	containing	exonic
MSTRG.14338.46	OS_LNC0238	sense	genic	0	containing	exonic
MSTRG.14338.7	OS_LNC0239	sense	genic	0	containing	exonic
MSTRG.14338.8	OS_LNC0240	sense	genic	0	containing	exonic
MSTRG.14338.9	OS_LNC0241	sense	genic	0	containing	exonic
MSTRG.14341.1	OS_LNC0242	antisense	intergenic	15027	divergent	upstream
MSTRG.14351.1	OS_LNC0243	sense	intergenic	8911	same_strand	downstream
MSTRG.14352.1	OS_LNC0244	sense	intergenic	13906	same_strand	downstream
MSTRG.14357.1	OS_LNC0245	antisense	intergenic	20009	convergent	downstream
MSTRG.14358.2	OS_LNC0246	antisense	intergenic	35048	convergent	downstream
MSTRG.14365.1	OS_LNC0247	antisense	intergenic	972	convergent	downstream
MSTRG.14365.2	OS_LNC0248	antisense	intergenic	1110	convergent	downstream
MSTRG.14394.1	OS_LNC0249	sense	intergenic	3484	same_strand	upstream
MSTRG.14395.1	OS_LNC0250	sense	intergenic	9993	same_strand	upstream
MSTRG.14418.1	OS_LNC0251	sense	intergenic	68137	same_strand	downstream
MSTRG.14463.1	OS_LNC0252	sense	genic	0	containing	exonic
MSTRG.14486.1	OS_LNC0253	antisense	intergenic	41101	convergent	downstream
MSTRG.14562.1	OS_LNC0254	antisense	genic	0	overlapping	exonic
MSTRG.14562.2	OS_LNC0255	antisense	genic	0	overlapping	exonic
MSTRG.14562.3	OS_LNC0256	antisense	genic	0	overlapping	exonic
MSTRG.14582.1	OS_LNC0257	antisense	intergenic	497	divergent	upstream
MSTRG.14582.2	OS_LNC0258	antisense	intergenic	1041	divergent	upstream
MSTRG.14604.1	OS_LNC0259	sense	intergenic	20499	same_strand	downstream
MSTRG.14607.1	OS_LNC0260	antisense	intergenic	2137	convergent	downstream
MSTRG.14626.2	OS_LNC0261	sense	genic	0	containing	exonic
MSTRG.14648.1	OS_LNC0262	antisense	intergenic	4234	divergent	upstream
MSTRG.14712.1	OS_LNC0263	sense	genic	0	containing	exonic
MSTRG.14743.1	OS_LNC0264	sense	genic	0	containing	exonic
MSTRG.14782.1	OS_LNC0265	sense	genic	0	containing	exonic
MSTRG.14782.2	OS_LNC0266	sense	genic	0	containing	exonic
MSTRG.14865.17	OS_LNC0267	sense	intergenic	613	same_strand	downstream
MSTRG.14865.8	OS_LNC0268	antisense	intergenic	373	convergent	downstream
MSTRG.14866.1	OS_LNC0269	antisense	genic	0	overlapping	exonic
MSTRG.14866.2	OS_LNC0270	antisense	genic	0	overlapping	exonic
MSTRG.14866.3	OS_LNC0271	antisense	genic	0	overlapping	exonic
MSTRG.14878.1	OS_LNC0272	sense	genic	0	containing	exonic
MSTRG.14878.3	OS_LNC0273	sense	genic	0	containing	exonic
MSTRG.14891.1	OS_LNC0274	sense	genic	0	containing	exonic
MSTRG.14892.2	OS_LNC0275	antisense	intergenic	2425	divergent	upstream
MSTRG.14924.1	OS_LNC0276	sense	intergenic	1101	same_strand	upstream
MSTRG.14926.1	OS_LNC0277	antisense	intergenic	1734	convergent	downstream
MSTRG.14962.1	OS_LNC0278	sense	genic	0	containing	exonic
MSTRG.150.1	OS_LNC0279	sense	intergenic	816	same_strand	downstream
MSTRG.15039.1	OS_LNC0280	antisense	genic	0	overlapping	exonic
MSTRG.15039.2	OS_LNC0281	antisense	genic	0	overlapping	exonic
MSTRG.15053.1	OS_LNC0282	sense	genic	0	containing	intronic
MSTRG.15053.3	OS_LNC0283	sense	genic	0	containing	intronic
MSTRG.15125.1	OS_LNC0284	sense	genic	0	containing	intronic
MSTRG.15156.4	OS_LNC0285	sense	intergenic	1148	same_strand	downstream
MSTRG.15400.1	OS_LNC0286	sense	genic	0	nested	exonic
MSTRG.15572.2	OS_LNC0287	sense	genic	0	overlapping	exonic
MSTRG.15666.1	OS_LNC0288	sense	intergenic	1474	same_strand	upstream
MSTRG.15698.1	OS_LNC0289	sense	genic	0	containing	exonic
MSTRG.15708.1	OS_LNC0290	sense	intergenic	16	same_strand	downstream
MSTRG.15847.1	OS_LNC0291	antisense	intergenic	193	divergent	upstream
MSTRG.159.1	OS_LNC0292	antisense	genic	0	overlapping	exonic
MSTRG.15943.1	OS_LNC0293	antisense	intergenic	5924	divergent	upstream
MSTRG.16003.1	OS_LNC0294	sense	intergenic	44597	same_strand	downstream
MSTRG.16006.3	OS_LNC0295	sense	intergenic	38562	same_strand	downstream
MSTRG.16194.2	OS_LNC0296	sense	genic	0	containing	exonic
MSTRG.16196.2	OS_LNC0297	sense	genic	0	containing	exonic
MSTRG.16224.2	OS_LNC0298	sense	genic	0	overlapping	exonic
MSTRG.16304.1	OS_LNC0299	sense	intergenic	90	same_strand	upstream
MSTRG.16352.1	OS_LNC0300	sense	intergenic	2223	same_strand	upstream
MSTRG.16368.1	OS_LNC0301	sense	intergenic	2354	same_strand	upstream
MSTRG.16470.1	OS_LNC0302	sense	genic	0	containing	exonic
MSTRG.16503.1	OS_LNC0303	sense	genic	0	containing	exonic
MSTRG.16503.2	OS_LNC0304	sense	genic	0	containing	exonic
MSTRG.16503.3	OS_LNC0305	sense	genic	0	containing	exonic
MSTRG.16503.4	OS_LNC0306	sense	genic	0	containing	exonic
MSTRG.16503.5	OS_LNC0307	sense	genic	0	containing	exonic
MSTRG.16528.1	OS_LNC0308	antisense	genic	0	overlapping	exonic
MSTRG.16532.1	OS_LNC0309	antisense	genic	0	nested	exonic
MSTRG.16539.2	OS_LNC0310	sense	genic	0	overlapping	exonic
MSTRG.16539.3	OS_LNC0311	sense	genic	0	overlapping	exonic
MSTRG.16539.4	OS_LNC0312	sense	genic	0	overlapping	exonic
MSTRG.16552.1	OS_LNC0313	antisense	intergenic	1112	divergent	upstream
MSTRG.16563.2	OS_LNC0314	antisense	genic	0	overlapping	exonic
MSTRG.16565.6	OS_LNC0315	sense	genic	0	overlapping	exonic
MSTRG.16577.1	OS_LNC0316	sense	genic	0	containing	exonic
MSTRG.16577.3	OS_LNC0317	sense	genic	0	containing	exonic
MSTRG.166.1	OS_LNC0318	antisense	genic	0	overlapping	exonic
MSTRG.16638.1	OS_LNC0319	antisense	intergenic	1626	divergent	upstream
MSTRG.16646.1	OS_LNC0320	antisense	intergenic	22	convergent	downstream
MSTRG.16708.2	OS_LNC0321	antisense	genic	0	nested	exonic
MSTRG.16718.1	OS_LNC0322	sense	genic	0	containing	exonic
MSTRG.16723.1	OS_LNC0323	antisense	genic	0	nested	intronic
MSTRG.16742.1	OS_LNC0324	sense	genic	0	containing	intronic
MSTRG.16746.1	OS_LNC0325	sense	intergenic	8346	same_strand	downstream
MSTRG.16746.2	OS_LNC0326	sense	intergenic	8346	same_strand	downstream
MSTRG.16746.3	OS_LNC0327	sense	intergenic	8346	same_strand	downstream
MSTRG.16746.4	OS_LNC0328	sense	intergenic	8346	same_strand	downstream
MSTRG.16797.1	OS_LNC0329	sense	genic	0	overlapping	exonic
MSTRG.16823.1	OS_LNC0330	sense	intergenic	564	same_strand	downstream
MSTRG.16823.2	OS_LNC0331	sense	intergenic	564	same_strand	downstream
MSTRG.16837.1	OS_LNC0332	antisense	genic	0	overlapping	exonic
MSTRG.16911.1	OS_LNC0333	antisense	genic	0	overlapping	exonic
MSTRG.16911.3	OS_LNC0334	antisense	genic	0	overlapping	exonic
MSTRG.16926.1	OS_LNC0335	sense	intergenic	1370	same_strand	upstream
MSTRG.16928.2	OS_LNC0336	sense	genic	0	overlapping	exonic
MSTRG.16967.1	OS_LNC0337	antisense	genic	0	nested	exonic
MSTRG.16998.2	OS_LNC0338	sense	genic	0	overlapping	exonic
MSTRG.16998.3	OS_LNC0339	sense	genic	0	overlapping	exonic
MSTRG.16998.4	OS_LNC0340	sense	genic	0	overlapping	exonic
MSTRG.16998.5	OS_LNC0341	sense	genic	0	overlapping	exonic
MSTRG.17093.3	OS_LNC0342	antisense	genic	0	overlapping	exonic
MSTRG.17125.1	OS_LNC0343	antisense	genic	0	nested	exonic
MSTRG.17175.1	OS_LNC0344	sense	intergenic	996	same_strand	downstream
MSTRG.1720.1	OS_LNC0345	sense	genic	0	containing	exonic
MSTRG.1723.7	OS_LNC0346	sense	genic	0	nested	exonic
MSTRG.17230.1	OS_LNC0347	antisense	intergenic	4249	convergent	downstream
MSTRG.17237.2	OS_LNC0348	antisense	genic	0	containing	intronic
MSTRG.17246.1	OS_LNC0349	antisense	intergenic	99	divergent	upstream
MSTRG.17253.2	OS_LNC0350	sense	intergenic	4194	same_strand	downstream
MSTRG.17262.1	OS_LNC0351	antisense	intergenic	4514	divergent	upstream
MSTRG.17271.5	OS_LNC0352	antisense	intergenic	141	convergent	downstream
MSTRG.17271.6	OS_LNC0353	antisense	intergenic	207	convergent	downstream
MSTRG.17271.7	OS_LNC0354	antisense	intergenic	272	convergent	downstream
MSTRG.17299.4	OS_LNC0355	sense	genic	0	nested	exonic
MSTRG.17300.2	OS_LNC0356	sense	genic	0	containing	exonic
MSTRG.17310.2	OS_LNC0357	antisense	genic	0	overlapping	exonic
MSTRG.17310.3	OS_LNC0358	antisense	genic	0	overlapping	exonic
MSTRG.17324.2	OS_LNC0359	sense	genic	0	nested	exonic
MSTRG.17345.1	OS_LNC0360	antisense	intergenic	881	convergent	downstream
MSTRG.174.1	OS_LNC0361	antisense	genic	0	overlapping	exonic
MSTRG.17425.1	OS_LNC0362	sense	genic	0	containing	exonic
MSTRG.17429.1	OS_LNC0363	antisense	genic	0	containing	exonic
MSTRG.1746.2	OS_LNC0364	sense	genic	0	containing	exonic
MSTRG.17464.1	OS_LNC0365	sense	genic	0	containing	exonic
MSTRG.17472.1	OS_LNC0366	sense	genic	0	containing	exonic
MSTRG.17601.2	OS_LNC0367	antisense	intergenic	247	divergent	upstream
MSTRG.17601.3	OS_LNC0368	antisense	intergenic	255	divergent	upstream
MSTRG.17601.4	OS_LNC0369	antisense	intergenic	255	divergent	upstream
MSTRG.17601.5	OS_LNC0370	antisense	intergenic	267	divergent	upstream
MSTRG.17601.6	OS_LNC0371	antisense	intergenic	267	divergent	upstream
MSTRG.17601.8	OS_LNC0372	antisense	intergenic	307	divergent	upstream
MSTRG.17601.9	OS_LNC0373	sense	intergenic	689	same_strand	upstream
MSTRG.17644.2	OS_LNC0374	sense	genic	0	nested	exonic
MSTRG.17765.1	OS_LNC0375	sense	genic	0	overlapping	exonic
MSTRG.17792.1	OS_LNC0376	antisense	intergenic	10854	convergent	downstream
MSTRG.17854.1	OS_LNC0377	antisense	intergenic	6948	divergent	upstream
MSTRG.17891.1	OS_LNC0378	sense	genic	0	overlapping	exonic
MSTRG.17891.2	OS_LNC0379	sense	genic	0	overlapping	exonic
MSTRG.17898.1	OS_LNC0380	sense	intergenic	2209	same_strand	downstream
MSTRG.17898.3	OS_LNC0381	sense	intergenic	2269	same_strand	downstream
MSTRG.17918.1	OS_LNC0382	sense	intergenic	559	same_strand	downstream
MSTRG.1793.1	OS_LNC0383	sense	intergenic	545	same_strand	downstream
MSTRG.17943.1	OS_LNC0384	sense	intergenic	24543	same_strand	upstream
MSTRG.17960.1	OS_LNC0385	sense	genic	0	containing	exonic
MSTRG.17960.5	OS_LNC0386	sense	genic	0	containing	exonic
MSTRG.18015.1	OS_LNC0387	sense	intergenic	8459	same_strand	upstream
MSTRG.18015.3	OS_LNC0388	sense	intergenic	19599	same_strand	upstream
MSTRG.1802.1	OS_LNC0389	sense	genic	0	containing	exonic
MSTRG.18093.5	OS_LNC0390	sense	genic	0	overlapping	exonic
MSTRG.18105.1	OS_LNC0391	sense	intergenic	268	same_strand	downstream
MSTRG.18126.2	OS_LNC0392	sense	intergenic	8069	same_strand	downstream
MSTRG.18126.4	OS_LNC0393	sense	intergenic	8069	same_strand	downstream
MSTRG.18130.1	OS_LNC0394	sense	intergenic	8758	same_strand	downstream
MSTRG.18135.1	OS_LNC0395	sense	genic	0	containing	exonic
MSTRG.18135.2	OS_LNC0396	sense	genic	0	containing	exonic
MSTRG.18135.3	OS_LNC0397	sense	genic	0	containing	exonic
MSTRG.18153.1	OS_LNC0398	sense	intergenic	2280	same_strand	downstream
MSTRG.18162.1	OS_LNC0399	antisense	genic	0	overlapping	exonic
MSTRG.182.3	OS_LNC0400	antisense	genic	0	containing	exonic
MSTRG.18205.1	OS_LNC0401	sense	genic	0	nested	exonic
MSTRG.18208.1	OS_LNC0402	antisense	intergenic	17696	convergent	downstream
MSTRG.18217.1	OS_LNC0403	sense	intergenic	7735	same_strand	downstream
MSTRG.18218.1	OS_LNC0404	sense	intergenic	10519	same_strand	downstream
MSTRG.18218.2	OS_LNC0405	sense	intergenic	10653	same_strand	downstream
MSTRG.18229.10	OS_LNC0406	sense	genic	0	containing	exonic
MSTRG.18229.3	OS_LNC0407	sense	genic	0	containing	exonic
MSTRG.18229.5	OS_LNC0408	sense	genic	0	containing	exonic
MSTRG.18229.8	OS_LNC0409	sense	genic	0	containing	exonic
MSTRG.18231.1	OS_LNC0410	sense	genic	0	nested	exonic
MSTRG.18232.1	OS_LNC0411	sense	genic	0	overlapping	exonic
MSTRG.18311.1	OS_LNC0412	antisense	intergenic	2865	divergent	upstream
MSTRG.18312.1	OS_LNC0413	sense	genic	0	containing	exonic
MSTRG.18312.3	OS_LNC0414	sense	genic	0	containing	exonic
MSTRG.18312.4	OS_LNC0415	sense	genic	0	containing	exonic
MSTRG.18370.1	OS_LNC0416	sense	genic	0	overlapping	exonic
MSTRG.18388.1	OS_LNC0417	sense	genic	0	containing	exonic
MSTRG.18388.2	OS_LNC0418	sense	genic	0	containing	exonic
MSTRG.18388.5	OS_LNC0419	sense	genic	0	containing	exonic
MSTRG.1843.3	OS_LNC0420	sense	genic	0	overlapping	exonic
MSTRG.18433.1	OS_LNC0421	antisense	intergenic	3410	convergent	downstream
MSTRG.18475.5	OS_LNC0422	sense	genic	0	containing	exonic
MSTRG.18489.1	OS_LNC0423	sense	intergenic	774	same_strand	downstream
MSTRG.18523.1	OS_LNC0424	antisense	intergenic	10023	convergent	downstream
MSTRG.18533.3	OS_LNC0425	sense	genic	0	containing	exonic
MSTRG.18607.1	OS_LNC0426	antisense	genic	0	nested	intronic
MSTRG.18615.1	OS_LNC0427	antisense	intergenic	1168	convergent	downstream
MSTRG.18620.3	OS_LNC0428	antisense	intergenic	16640	divergent	upstream
MSTRG.18765.1	OS_LNC0429	sense	intergenic	1317	same_strand	downstream
MSTRG.188.1	OS_LNC0430	antisense	genic	0	nested	exonic
MSTRG.18801.1	OS_LNC0431	sense	intergenic	3021	same_strand	downstream
MSTRG.18896.1	OS_LNC0432	sense	genic	0	containing	exonic
MSTRG.18992.1	OS_LNC0433	sense	intergenic	30114	same_strand	upstream
MSTRG.18992.2	OS_LNC0434	sense	intergenic	30153	same_strand	upstream
MSTRG.19007.1	OS_LNC0435	sense	genic	0	overlapping	exonic
MSTRG.19027.1	OS_LNC0436	antisense	genic	0	overlapping	exonic
MSTRG.19056.3	OS_LNC0437	sense	genic	0	overlapping	exonic
MSTRG.191.1	OS_LNC0438	antisense	genic	0	overlapping	intronic
MSTRG.19108.4	OS_LNC0439	sense	genic	0	nested	exonic
MSTRG.19224.1	OS_LNC0440	antisense	intergenic	1292	divergent	upstream
MSTRG.19277.1	OS_LNC0441	antisense	genic	0	overlapping	exonic
MSTRG.19277.2	OS_LNC0442	antisense	genic	0	overlapping	exonic
MSTRG.19277.3	OS_LNC0443	antisense	genic	0	overlapping	exonic
MSTRG.19277.4	OS_LNC0444	antisense	genic	0	overlapping	exonic
MSTRG.19277.5	OS_LNC0445	antisense	genic	0	overlapping	exonic
MSTRG.19330.2	OS_LNC0446	sense	genic	0	containing	exonic
MSTRG.19362.1	OS_LNC0447	sense	intergenic	952	same_strand	upstream
MSTRG.19372.2	OS_LNC0448	sense	genic	0	containing	exonic
MSTRG.19451.3	OS_LNC0449	sense	intergenic	3305	same_strand	upstream
MSTRG.19480.4	OS_LNC0450	sense	genic	0	overlapping	exonic
MSTRG.19498.1	OS_LNC0451	antisense	genic	0	nested	exonic
MSTRG.19532.1	OS_LNC0452	sense	genic	0	containing	exonic
MSTRG.19580.1	OS_LNC0453	sense	genic	0	containing	exonic
MSTRG.19607.1	OS_LNC0454	sense	intergenic	184	same_strand	downstream
MSTRG.19620.1	OS_LNC0455	sense	intergenic	2760	same_strand	upstream
MSTRG.19694.2	OS_LNC0456	sense	genic	0	containing	exonic
MSTRG.197.1	OS_LNC0457	sense	intergenic	469	same_strand	downstream
MSTRG.19729.1	OS_LNC0458	antisense	genic	0	overlapping	exonic
MSTRG.19765.1	OS_LNC0459	antisense	intergenic	19	convergent	downstream
MSTRG.1977.1	OS_LNC0460	antisense	intergenic	11790	convergent	downstream
MSTRG.19848.1	OS_LNC0461	sense	genic	0	containing	exonic
MSTRG.19875.3	OS_LNC0462	sense	genic	0	containing	exonic
MSTRG.19945.2	OS_LNC0463	sense	genic	0	containing	exonic
MSTRG.20008.1	OS_LNC0464	antisense	genic	0	nested	exonic
MSTRG.20009.1	OS_LNC0465	antisense	genic	0	nested	exonic
MSTRG.2002.2	OS_LNC0466	sense	genic	0	overlapping	intronic
MSTRG.2002.4	OS_LNC0467	sense	genic	0	overlapping	intronic
MSTRG.20160.5	OS_LNC0468	sense	genic	0	overlapping	exonic
MSTRG.20160.7	OS_LNC0469	antisense	genic	0	containing	exonic
MSTRG.20208.1	OS_LNC0470	sense	intergenic	3932	same_strand	upstream
MSTRG.20226.1	OS_LNC0471	sense	genic	0	containing	exonic
MSTRG.20254.2	OS_LNC0472	sense	intergenic	3202	same_strand	upstream
MSTRG.20289.2	OS_LNC0473	antisense	genic	0	overlapping	exonic
MSTRG.20289.4	OS_LNC0474	sense	genic	0	containing	exonic
MSTRG.20311.2	OS_LNC0475	sense	genic	0	overlapping	exonic
MSTRG.20438.1	OS_LNC0476	sense	intergenic	172	same_strand	downstream
MSTRG.20506.1	OS_LNC0477	antisense	intergenic	3832	divergent	upstream
MSTRG.20540.1	OS_LNC0478	antisense	intergenic	128	convergent	downstream
MSTRG.20582.1	OS_LNC0479	antisense	genic	0	overlapping	exonic
MSTRG.2059.1	OS_LNC0480	antisense	intergenic	6044	convergent	downstream
MSTRG.20671.1	OS_LNC0481	antisense	intergenic	1502	divergent	upstream
MSTRG.20699.1	OS_LNC0482	sense	genic	0	overlapping	exonic
MSTRG.20742.2	OS_LNC0483	sense	genic	0	overlapping	exonic
MSTRG.20759.1	OS_LNC0484	sense	genic	0	containing	exonic
MSTRG.20827.4	OS_LNC0485	sense	genic	0	nested	exonic
MSTRG.20827.5	OS_LNC0486	sense	genic	0	nested	exonic
MSTRG.20837.1	OS_LNC0487	sense	intergenic	798	same_strand	downstream
MSTRG.20844.1	OS_LNC0488	sense	genic	0	containing	exonic
MSTRG.20888.1	OS_LNC0489	sense	genic	0	nested	exonic
MSTRG.20893.1	OS_LNC0490	antisense	genic	0	nested	exonic
MSTRG.20898.1	OS_LNC0491	antisense	intergenic	222	divergent	upstream
MSTRG.2105.2	OS_LNC0492	sense	intergenic	9463	same_strand	downstream
MSTRG.2105.8	OS_LNC0493	sense	intergenic	9505	same_strand	downstream
MSTRG.21056.2	OS_LNC0494	antisense	genic	0	overlapping	exonic
MSTRG.21064.1	OS_LNC0495	antisense	genic	0	overlapping	exonic
MSTRG.21080.1	OS_LNC0496	antisense	intergenic	4944	convergent	downstream
MSTRG.21081.1	OS_LNC0497	antisense	intergenic	3842	convergent	downstream
MSTRG.21081.2	OS_LNC0498	antisense	intergenic	3812	convergent	downstream
MSTRG.21082.1	OS_LNC0499	sense	genic	0	containing	exonic
MSTRG.21082.2	OS_LNC0500	sense	genic	0	containing	exonic
MSTRG.21105.1	OS_LNC0501	sense	genic	0	containing	exonic
MSTRG.21129.1	OS_LNC0502	sense	intergenic	1703	same_strand	upstream
MSTRG.21133.1	OS_LNC0503	sense	genic	0	containing	exonic
MSTRG.21146.1	OS_LNC0504	sense	genic	0	containing	exonic
MSTRG.21149.1	OS_LNC0505	antisense	intergenic	380	convergent	downstream
MSTRG.21149.3	OS_LNC0506	antisense	intergenic	380	convergent	downstream
MSTRG.21149.4	OS_LNC0507	antisense	intergenic	380	convergent	downstream
MSTRG.2117.2	OS_LNC0508	sense	genic	0	containing	exonic
MSTRG.21172.5	OS_LNC0509	sense	genic	0	overlapping	exonic
MSTRG.21172.7	OS_LNC0510	sense	genic	0	overlapping	exonic
MSTRG.21173.1	OS_LNC0511	antisense	genic	0	overlapping	exonic
MSTRG.21174.1	OS_LNC0512	sense	genic	0	overlapping	exonic
MSTRG.21174.19	OS_LNC0513	sense	genic	0	containing	exonic
MSTRG.21174.21	OS_LNC0514	sense	genic	0	containing	exonic
MSTRG.21195.1	OS_LNC0515	sense	intergenic	4066	same_strand	upstream
MSTRG.21195.2	OS_LNC0516	sense	intergenic	4007	same_strand	upstream
MSTRG.21247.1	OS_LNC0517	sense	genic	0	containing	exonic
MSTRG.21247.3	OS_LNC0518	sense	genic	0	overlapping	exonic
MSTRG.21248.1	OS_LNC0519	sense	genic	0	containing	exonic
MSTRG.21248.12	OS_LNC0520	sense	genic	0	containing	exonic
MSTRG.21248.17	OS_LNC0521	sense	genic	0	containing	exonic
MSTRG.21248.5	OS_LNC0522	sense	genic	0	containing	exonic
MSTRG.21287.1	OS_LNC0523	sense	genic	0	containing	exonic
MSTRG.21287.2	OS_LNC0524	sense	genic	0	containing	exonic
MSTRG.21301.3	OS_LNC0525	sense	genic	0	overlapping	exonic
MSTRG.21314.1	OS_LNC0526	antisense	genic	0	overlapping	exonic
MSTRG.21316.1	OS_LNC0527	antisense	genic	0	overlapping	exonic
MSTRG.21316.2	OS_LNC0528	antisense	genic	0	overlapping	exonic
MSTRG.21316.3	OS_LNC0529	antisense	genic	0	overlapping	exonic
MSTRG.21342.1	OS_LNC0530	antisense	intergenic	4998	convergent	downstream
MSTRG.21357.1	OS_LNC0531	antisense	genic	0	overlapping	exonic
MSTRG.21362.3	OS_LNC0532	sense	genic	0	containing	exonic
MSTRG.21365.1	OS_LNC0533	sense	genic	0	containing	exonic
MSTRG.21409.1	OS_LNC0534	sense	genic	0	overlapping	exonic
MSTRG.21420.1	OS_LNC0535	sense	genic	0	nested	exonic
MSTRG.21430.5	OS_LNC0536	sense	genic	0	overlapping	exonic
MSTRG.21454.1	OS_LNC0537	sense	genic	0	containing	exonic
MSTRG.21466.1	OS_LNC0538	sense	genic	0	containing	exonic
MSTRG.21473.1	OS_LNC0539	antisense	genic	0	overlapping	exonic
MSTRG.21505.1	OS_LNC0540	sense	genic	0	containing	exonic
MSTRG.21505.2	OS_LNC0541	sense	genic	0	containing	exonic
MSTRG.21540.1	OS_LNC0542	sense	genic	0	containing	exonic
MSTRG.21540.2	OS_LNC0543	sense	genic	0	containing	exonic
MSTRG.21596.5	OS_LNC0544	sense	genic	0	nested	exonic
MSTRG.21644.1	OS_LNC0545	antisense	intergenic	867	divergent	upstream
MSTRG.21735.2	OS_LNC0546	sense	genic	0	nested	exonic
MSTRG.2174.1	OS_LNC0547	antisense	intergenic	3178	convergent	downstream
MSTRG.21741.1	OS_LNC0548	sense	intergenic	2230	same_strand	downstream
MSTRG.21766.1	OS_LNC0549	sense	genic	0	containing	exonic
MSTRG.21937.1	OS_LNC0550	sense	genic	0	containing	exonic
MSTRG.21937.2	OS_LNC0551	sense	genic	0	containing	exonic
MSTRG.21937.4	OS_LNC0552	sense	genic	0	overlapping	exonic
MSTRG.21991.2	OS_LNC0553	sense	genic	0	nested	exonic
MSTRG.21992.1	OS_LNC0554	antisense	genic	0	nested	exonic
MSTRG.22066.1	OS_LNC0555	antisense	genic	0	overlapping	exonic
MSTRG.22095.1	OS_LNC0556	sense	genic	0	containing	exonic
MSTRG.22139.1	OS_LNC0557	antisense	genic	0	overlapping	exonic
MSTRG.22165.1	OS_LNC0558	antisense	genic	0	overlapping	exonic
MSTRG.22225.1	OS_LNC0559	sense	genic	0	containing	exonic
MSTRG.22225.2	OS_LNC0560	sense	genic	0	containing	exonic
MSTRG.22225.3	OS_LNC0561	antisense	genic	0	overlapping	exonic
MSTRG.22225.5	OS_LNC0562	sense	genic	0	containing	exonic
MSTRG.22225.6	OS_LNC0563	sense	genic	0	containing	exonic
MSTRG.22225.8	OS_LNC0564	sense	genic	0	containing	exonic
MSTRG.22226.1	OS_LNC0565	antisense	genic	0	overlapping	exonic
MSTRG.22226.2	OS_LNC0566	antisense	genic	0	overlapping	exonic
MSTRG.22226.3	OS_LNC0567	antisense	genic	0	overlapping	exonic
MSTRG.22226.4	OS_LNC0568	antisense	genic	0	overlapping	exonic
MSTRG.22226.6	OS_LNC0569	antisense	genic	0	overlapping	exonic
MSTRG.22226.7	OS_LNC0570	antisense	genic	0	overlapping	exonic
MSTRG.22345.2	OS_LNC0571	sense	intergenic	4039	same_strand	upstream
MSTRG.22351.1	OS_LNC0572	sense	intergenic	1528	same_strand	upstream
MSTRG.22379.2	OS_LNC0573	sense	genic	0	overlapping	exonic
MSTRG.22387.1	OS_LNC0574	antisense	genic	0	overlapping	exonic
MSTRG.2241.1	OS_LNC0575	sense	intergenic	6017	same_strand	upstream
MSTRG.2243.1	OS_LNC0576	sense	intergenic	8868	same_strand	downstream
MSTRG.2243.2	OS_LNC0577	sense	intergenic	8872	same_strand	downstream
MSTRG.22430.1	OS_LNC0578	antisense	intergenic	2	convergent	downstream
MSTRG.22546.1	OS_LNC0579	sense	intergenic	6948	same_strand	downstream
MSTRG.22546.2	OS_LNC0580	sense	intergenic	7000	same_strand	downstream
MSTRG.22546.3	OS_LNC0581	sense	intergenic	7514	same_strand	downstream
MSTRG.22546.4	OS_LNC0582	sense	intergenic	7920	same_strand	downstream
MSTRG.22624.1	OS_LNC0583	antisense	intergenic	1846	divergent	upstream
MSTRG.22637.1	OS_LNC0584	sense	intergenic	2680	same_strand	upstream
MSTRG.22637.4	OS_LNC0585	sense	intergenic	2823	same_strand	upstream
MSTRG.22654.1	OS_LNC0586	sense	genic	0	containing	exonic
MSTRG.22654.2	OS_LNC0587	sense	genic	0	containing	exonic
MSTRG.22664.1	OS_LNC0588	sense	intergenic	2225	same_strand	downstream
MSTRG.22665.5	OS_LNC0589	sense	genic	0	overlapping	exonic
MSTRG.22676.1	OS_LNC0590	sense	genic	0	overlapping	exonic
MSTRG.22681.1	OS_LNC0591	antisense	intergenic	89	convergent	downstream
MSTRG.22687.1	OS_LNC0592	sense	intergenic	267	same_strand	upstream
MSTRG.2270.1	OS_LNC0593	antisense	intergenic	4237	convergent	downstream
MSTRG.2270.2	OS_LNC0594	antisense	intergenic	4277	convergent	downstream
MSTRG.2270.3	OS_LNC0595	antisense	intergenic	4310	convergent	downstream
MSTRG.22704.1	OS_LNC0596	antisense	intergenic	153	convergent	downstream
MSTRG.22704.2	OS_LNC0597	antisense	intergenic	295	convergent	downstream
MSTRG.2281.1	OS_LNC0598	antisense	intergenic	97	convergent	downstream
MSTRG.22826.1	OS_LNC0599	antisense	genic	0	overlapping	exonic
MSTRG.22869.1	OS_LNC0600	sense	genic	0	containing	exonic
MSTRG.2287.1	OS_LNC0601	sense	genic	0	nested	intronic
MSTRG.2288.1	OS_LNC0602	antisense	genic	0	nested	intronic
MSTRG.22981.1	OS_LNC0603	sense	intergenic	2190	same_strand	downstream
MSTRG.22995.1	OS_LNC0604	sense	intergenic	2291	same_strand	upstream
MSTRG.2308.2	OS_LNC0605	antisense	genic	0	nested	exonic
MSTRG.23136.1	OS_LNC0606	sense	intergenic	2113	same_strand	downstream
MSTRG.23184.1	OS_LNC0607	sense	genic	0	containing	exonic
MSTRG.23228.1	OS_LNC0608	sense	intergenic	325	same_strand	downstream
MSTRG.23265.1	OS_LNC0609	antisense	genic	0	overlapping	exonic
MSTRG.23279.2	OS_LNC0610	sense	genic	0	containing	exonic
MSTRG.23479.1	OS_LNC0611	sense	genic	0	containing	exonic
MSTRG.23507.1	OS_LNC0612	sense	intergenic	745	same_strand	upstream
MSTRG.23579.2	OS_LNC0613	sense	genic	0	overlapping	exonic
MSTRG.2361.1	OS_LNC0614	antisense	intergenic	2114	convergent	downstream
MSTRG.23612.1	OS_LNC0615	antisense	genic	0	overlapping	exonic
MSTRG.23612.2	OS_LNC0616	antisense	genic	0	overlapping	exonic
MSTRG.23613.1	OS_LNC0617	antisense	genic	0	overlapping	exonic
MSTRG.23613.2	OS_LNC0618	antisense	genic	0	overlapping	exonic
MSTRG.23613.3	OS_LNC0619	antisense	genic	0	overlapping	exonic
MSTRG.23614.1	OS_LNC0620	antisense	genic	0	containing	exonic
MSTRG.23615.1	OS_LNC0621	antisense	genic	0	overlapping	exonic
MSTRG.23615.2	OS_LNC0622	antisense	genic	0	overlapping	exonic
MSTRG.2371.1	OS_LNC0623	sense	intergenic	268	same_strand	downstream
MSTRG.23716.2	OS_LNC0624	sense	intergenic	6029	same_strand	upstream
MSTRG.23763.1	OS_LNC0625	antisense	genic	0	nested	exonic
MSTRG.23763.2	OS_LNC0626	antisense	genic	0	nested	exonic
MSTRG.23788.2	OS_LNC0627	sense	genic	0	nested	exonic
MSTRG.23811.1	OS_LNC0628	antisense	genic	0	overlapping	exonic
MSTRG.23829.1	OS_LNC0629	sense	intergenic	1474	same_strand	upstream
MSTRG.2384.1	OS_LNC0630	sense	intergenic	18579	same_strand	upstream
MSTRG.23840.1	OS_LNC0631	antisense	intergenic	45	divergent	upstream
MSTRG.23893.1	OS_LNC0632	antisense	intergenic	27429	convergent	downstream
MSTRG.23968.1	OS_LNC0633	sense	genic	0	overlapping	exonic
MSTRG.24045.1	OS_LNC0634	antisense	genic	0	nested	exonic
MSTRG.24045.2	OS_LNC0635	antisense	genic	0	nested	exonic
MSTRG.24045.3	OS_LNC0636	antisense	genic	0	nested	exonic
MSTRG.24046.1	OS_LNC0637	antisense	genic	0	overlapping	exonic
MSTRG.24046.2	OS_LNC0638	antisense	genic	0	overlapping	exonic
MSTRG.24046.5	OS_LNC0639	antisense	genic	0	overlapping	exonic
MSTRG.24107.1	OS_LNC0640	antisense	genic	0	nested	exonic
MSTRG.24175.2	OS_LNC0641	sense	genic	0	nested	exonic
MSTRG.24254.1	OS_LNC0642	antisense	intergenic	1727	divergent	upstream
MSTRG.24297.2	OS_LNC0643	antisense	intergenic	7393	divergent	upstream
MSTRG.2430.1	OS_LNC0644	antisense	intergenic	12922	divergent	upstream
MSTRG.24414.2	OS_LNC0645	sense	genic	0	containing	exonic
MSTRG.2445.1	OS_LNC0646	antisense	intergenic	19674	convergent	downstream
MSTRG.2445.2	OS_LNC0647	antisense	intergenic	19674	convergent	downstream
MSTRG.2445.3	OS_LNC0648	antisense	intergenic	19674	convergent	downstream
MSTRG.24491.1	OS_LNC0649	sense	genic	0	containing	exonic
MSTRG.24491.2	OS_LNC0650	sense	genic	0	containing	exonic
MSTRG.24504.3	OS_LNC0651	sense	genic	0	nested	exonic
MSTRG.24510.1	OS_LNC0652	antisense	intergenic	6644	divergent	upstream
MSTRG.2452.1	OS_LNC0653	antisense	intergenic	10816	convergent	downstream
MSTRG.24543.2	OS_LNC0654	sense	genic	0	containing	exonic
MSTRG.24583.2	OS_LNC0655	sense	genic	0	nested	exonic
MSTRG.24594.1	OS_LNC0656	sense	genic	0	overlapping	exonic
MSTRG.24670.1	OS_LNC0657	sense	intergenic	36772	same_strand	downstream
MSTRG.24670.2	OS_LNC0658	sense	intergenic	36772	same_strand	downstream
MSTRG.24670.3	OS_LNC0659	sense	intergenic	36772	same_strand	downstream
MSTRG.24671.1	OS_LNC0660	antisense	intergenic	33432	convergent	downstream
MSTRG.24677.1	OS_LNC0661	sense	intergenic	17279	same_strand	upstream
MSTRG.2470.5	OS_LNC0662	sense	genic	0	overlapping	exonic
MSTRG.24702.3	OS_LNC0663	sense	intergenic	7866	same_strand	upstream
MSTRG.24723.4	OS_LNC0664	sense	genic	0	overlapping	exonic
MSTRG.2477.1	OS_LNC0665	sense	intergenic	1175	same_strand	downstream
MSTRG.2484.4	OS_LNC0666	sense	genic	0	nested	exonic
MSTRG.24850.1	OS_LNC0667	sense	genic	0	containing	exonic
MSTRG.24850.2	OS_LNC0668	sense	genic	0	containing	exonic
MSTRG.24858.1	OS_LNC0669	sense	genic	0	containing	exonic
MSTRG.24858.11	OS_LNC0670	antisense	intergenic	13	divergent	upstream
MSTRG.24909.1	OS_LNC0671	antisense	intergenic	14561	divergent	upstream
MSTRG.24909.2	OS_LNC0672	antisense	intergenic	14708	divergent	upstream
MSTRG.24927.10	OS_LNC0673	sense	genic	0	overlapping	exonic
MSTRG.24942.3	OS_LNC0674	sense	genic	0	nested	exonic
MSTRG.24952.1	OS_LNC0675	sense	genic	0	containing	exonic
MSTRG.24952.4	OS_LNC0676	sense	genic	0	containing	exonic
MSTRG.24984.1	OS_LNC0677	antisense	genic	0	nested	exonic
MSTRG.24987.1	OS_LNC0678	sense	intergenic	1216	same_strand	downstream
MSTRG.25010.1	OS_LNC0679	sense	genic	0	nested	intronic
MSTRG.25014.1	OS_LNC0680	antisense	genic	0	overlapping	exonic
MSTRG.25018.1	OS_LNC0681	antisense	intergenic	6418	divergent	upstream
MSTRG.25024.1	OS_LNC0682	antisense	intergenic	8553	convergent	downstream
MSTRG.25027.1	OS_LNC0683	sense	genic	0	containing	exonic
MSTRG.25045.1	OS_LNC0684	sense	intergenic	9759	same_strand	upstream
MSTRG.25066.2	OS_LNC0685	antisense	intergenic	5707	divergent	upstream
MSTRG.25083.1	OS_LNC0686	sense	genic	0	containing	exonic
MSTRG.25098.1	OS_LNC0687	antisense	intergenic	11961	convergent	downstream
MSTRG.25128.1	OS_LNC0688	sense	intergenic	4864	same_strand	downstream
MSTRG.25133.3	OS_LNC0689	sense	genic	0	containing	exonic
MSTRG.2516.1	OS_LNC0690	sense	intergenic	2743	same_strand	downstream
MSTRG.25311.1	OS_LNC0691	antisense	genic	0	nested	exonic
MSTRG.2538.1	OS_LNC0692	antisense	genic	0	nested	exonic
MSTRG.2545.10	OS_LNC0693	sense	genic	0	containing	exonic
MSTRG.2545.11	OS_LNC0694	sense	genic	0	containing	exonic
MSTRG.2545.17	OS_LNC0695	sense	genic	0	containing	exonic
MSTRG.2545.4	OS_LNC0696	sense	genic	0	containing	exonic
MSTRG.25484.1	OS_LNC0697	antisense	intergenic	278	convergent	downstream
MSTRG.2550.1	OS_LNC0698	antisense	intergenic	3719	convergent	downstream
MSTRG.25508.1	OS_LNC0699	antisense	intergenic	9503	divergent	upstream
MSTRG.25538.1	OS_LNC0700	sense	genic	0	containing	exonic
MSTRG.25571.1	OS_LNC0701	antisense	intergenic	6495	convergent	downstream
MSTRG.25594.1	OS_LNC0702	sense	genic	0	containing	exonic
MSTRG.25667.1	OS_LNC0703	sense	intergenic	1611	same_strand	downstream
MSTRG.25668.1	OS_LNC0704	antisense	intergenic	3191	convergent	downstream
MSTRG.25675.3	OS_LNC0705	sense	genic	0	overlapping	exonic
MSTRG.25701.1	OS_LNC0706	sense	genic	0	containing	exonic
MSTRG.25701.2	OS_LNC0707	sense	genic	0	containing	exonic
MSTRG.25701.3	OS_LNC0708	sense	genic	0	containing	exonic
MSTRG.25701.4	OS_LNC0709	sense	genic	0	containing	exonic
MSTRG.25701.6	OS_LNC0710	sense	genic	0	overlapping	exonic
MSTRG.25757.1	OS_LNC0711	sense	genic	0	containing	exonic
MSTRG.25793.1	OS_LNC0712	antisense	intergenic	2238	convergent	downstream
MSTRG.25801.1	OS_LNC0713	antisense	intergenic	12	divergent	upstream
MSTRG.25911.1	OS_LNC0714	antisense	genic	0	nested	exonic
MSTRG.25917.1	OS_LNC0715	sense	genic	0	containing	exonic
MSTRG.25936.1	OS_LNC0716	antisense	genic	0	overlapping	exonic
MSTRG.25943.1	OS_LNC0717	antisense	intergenic	2407	divergent	upstream
MSTRG.25975.1	OS_LNC0718	sense	genic	0	overlapping	exonic
MSTRG.26.3	OS_LNC0719	antisense	genic	0	overlapping	exonic
MSTRG.26.4	OS_LNC0720	sense	genic	0	containing	exonic
MSTRG.26.6	OS_LNC0721	sense	genic	0	overlapping	exonic
MSTRG.2608.1	OS_LNC0722	sense	genic	0	containing	exonic
MSTRG.26156.1	OS_LNC0723	sense	genic	0	containing	exonic
MSTRG.26177.1	OS_LNC0724	antisense	genic	0	overlapping	exonic
MSTRG.2621.3	OS_LNC0725	sense	genic	0	containing	exonic
MSTRG.26285.1	OS_LNC0726	sense	intergenic	5595	same_strand	upstream
MSTRG.26308.1	OS_LNC0727	sense	genic	0	containing	exonic
MSTRG.26347.3	OS_LNC0728	sense	genic	0	overlapping	exonic
MSTRG.26347.4	OS_LNC0729	sense	genic	0	overlapping	exonic
MSTRG.26377.1	OS_LNC0730	antisense	genic	0	containing	exonic
MSTRG.26433.7	OS_LNC0731	sense	genic	0	nested	exonic
MSTRG.26490.1	OS_LNC0732	sense	intergenic	2950	same_strand	downstream
MSTRG.26555.1	OS_LNC0733	antisense	genic	0	nested	exonic
MSTRG.26628.1	OS_LNC0734	sense	genic	0	containing	exonic
MSTRG.2672.1	OS_LNC0735	sense	genic	0	containing	exonic
MSTRG.2672.2	OS_LNC0736	sense	intergenic	693	same_strand	upstream
MSTRG.26743.2	OS_LNC0737	sense	genic	0	overlapping	exonic
MSTRG.26797.1	OS_LNC0738	sense	genic	0	containing	exonic
MSTRG.26797.2	OS_LNC0739	sense	genic	0	containing	exonic
MSTRG.26797.3	OS_LNC0740	sense	genic	0	containing	exonic
MSTRG.26802.1	OS_LNC0741	sense	intergenic	877	same_strand	upstream
MSTRG.26841.2	OS_LNC0742	sense	genic	0	containing	exonic
MSTRG.26911.5	OS_LNC0743	sense	intergenic	1950	same_strand	downstream
MSTRG.26911.8	OS_LNC0744	sense	intergenic	1995	same_strand	downstream
MSTRG.26931.1	OS_LNC0745	sense	genic	0	containing	exonic
MSTRG.26983.1	OS_LNC0746	sense	intergenic	1484	same_strand	downstream
MSTRG.26983.2	OS_LNC0747	sense	intergenic	1480	same_strand	downstream
MSTRG.26983.4	OS_LNC0748	sense	intergenic	1486	same_strand	downstream
MSTRG.26983.7	OS_LNC0749	sense	intergenic	1488	same_strand	downstream
MSTRG.27048.2	OS_LNC0750	sense	intergenic	339	same_strand	upstream
MSTRG.27106.2	OS_LNC0751	sense	genic	0	containing	exonic
MSTRG.27159.1	OS_LNC0752	sense	intergenic	6249	same_strand	downstream
MSTRG.2716.1	OS_LNC0753	antisense	intergenic	6563	convergent	downstream
MSTRG.27175.2	OS_LNC0754	sense	genic	0	nested	exonic
MSTRG.27189.2	OS_LNC0755	sense	intergenic	550	same_strand	downstream
MSTRG.27198.1	OS_LNC0756	antisense	intergenic	2932	convergent	downstream
MSTRG.27224.1	OS_LNC0757	sense	intergenic	11200	same_strand	upstream
MSTRG.27224.6	OS_LNC0758	sense	intergenic	11202	same_strand	upstream
MSTRG.27291.1	OS_LNC0759	antisense	genic	0	nested	exonic
MSTRG.27444.4	OS_LNC0760	sense	genic	0	overlapping	exonic
MSTRG.27444.5	OS_LNC0761	sense	genic	0	overlapping	exonic
MSTRG.27484.1	OS_LNC0762	antisense	genic	0	overlapping	exonic
MSTRG.27507.1	OS_LNC0763	antisense	intergenic	14908	convergent	downstream
MSTRG.27510.1	OS_LNC0764	sense	intergenic	29952	same_strand	upstream
MSTRG.27510.3	OS_LNC0765	sense	intergenic	30035	same_strand	upstream
MSTRG.27583.1	OS_LNC0766	sense	intergenic	1919	same_strand	downstream
MSTRG.27616.1	OS_LNC0767	sense	genic	0	containing	intronic
MSTRG.27617.3	OS_LNC0768	sense	intergenic	15302	same_strand	downstream
MSTRG.27617.4	OS_LNC0769	sense	intergenic	15302	same_strand	downstream
MSTRG.27617.5	OS_LNC0770	sense	intergenic	14746	same_strand	upstream
MSTRG.27647.1	OS_LNC0771	antisense	genic	0	nested	exonic
MSTRG.27647.2	OS_LNC0772	antisense	genic	0	nested	exonic
MSTRG.27647.4	OS_LNC0773	antisense	genic	0	nested	exonic
MSTRG.27689.1	OS_LNC0774	sense	intergenic	39349	same_strand	downstream
MSTRG.27698.3	OS_LNC0775	sense	intergenic	1557	same_strand	upstream
MSTRG.2771.1	OS_LNC0776	antisense	genic	0	overlapping	exonic
MSTRG.27724.2	OS_LNC0777	sense	genic	0	containing	exonic
MSTRG.27757.12	OS_LNC0778	sense	genic	0	overlapping	exonic
MSTRG.27772.1	OS_LNC0779	sense	intergenic	12749	same_strand	downstream
MSTRG.27793.1	OS_LNC0780	antisense	intergenic	1	divergent	upstream
MSTRG.27795.1	OS_LNC0781	antisense	genic	0	overlapping	exonic
MSTRG.27796.1	OS_LNC0782	sense	intergenic	237	same_strand	upstream
MSTRG.27877.6	OS_LNC0783	sense	genic	0	overlapping	exonic
MSTRG.27887.1	OS_LNC0784	sense	intergenic	6189	same_strand	downstream
MSTRG.27903.1	OS_LNC0785	antisense	intergenic	35	divergent	upstream
MSTRG.27905.1	OS_LNC0786	antisense	intergenic	3516	convergent	downstream
MSTRG.27906.1	OS_LNC0787	antisense	intergenic	37785	convergent	downstream
MSTRG.2794.1	OS_LNC0788	sense	intergenic	5533	same_strand	downstream
MSTRG.27963.1	OS_LNC0789	sense	intergenic	11349	same_strand	downstream
MSTRG.28022.1	OS_LNC0790	sense	intergenic	42538	same_strand	upstream
MSTRG.28029.2	OS_LNC0791	sense	intergenic	1688	same_strand	downstream
MSTRG.28055.1	OS_LNC0792	sense	genic	0	containing	exonic
MSTRG.28060.1	OS_LNC0793	antisense	intergenic	802	convergent	downstream
MSTRG.28060.2	OS_LNC0794	antisense	intergenic	802	convergent	downstream
MSTRG.28060.6	OS_LNC0795	antisense	intergenic	844	convergent	downstream
MSTRG.28060.7	OS_LNC0796	antisense	intergenic	878	convergent	downstream
MSTRG.28074.1	OS_LNC0797	sense	genic	0	nested	exonic
MSTRG.28087.2	OS_LNC0798	sense	genic	0	nested	exonic
MSTRG.28104.1	OS_LNC0799	antisense	intergenic	5657	divergent	upstream
MSTRG.28107.1	OS_LNC0800	antisense	intergenic	5063	divergent	upstream
MSTRG.28127.1	OS_LNC0801	antisense	intergenic	45543	divergent	upstream
MSTRG.28128.1	OS_LNC0802	sense	intergenic	49838	same_strand	upstream
MSTRG.28140.1	OS_LNC0803	sense	intergenic	32819	same_strand	upstream
MSTRG.28141.1	OS_LNC0804	sense	intergenic	40289	same_strand	upstream
MSTRG.28143.1	OS_LNC0805	antisense	intergenic	54583	divergent	upstream
MSTRG.28147.1	OS_LNC0806	antisense	intergenic	1267	divergent	upstream
MSTRG.28156.1	OS_LNC0807	antisense	intergenic	12092	divergent	upstream
MSTRG.28159.1	OS_LNC0808	antisense	intergenic	14358	divergent	upstream
MSTRG.28166.1	OS_LNC0809	sense	intergenic	32766	same_strand	upstream
MSTRG.28260.1	OS_LNC0810	sense	intergenic	4880	same_strand	downstream
MSTRG.28267.1	OS_LNC0811	antisense	genic	0	nested	exonic
MSTRG.28289.1	OS_LNC0812	sense	genic	0	containing	exonic
MSTRG.28301.1	OS_LNC0813	antisense	intergenic	71494	convergent	downstream
MSTRG.28326.1	OS_LNC0814	sense	intergenic	6196	same_strand	downstream
MSTRG.28363.1	OS_LNC0815	antisense	genic	0	overlapping	exonic
MSTRG.28363.2	OS_LNC0816	antisense	genic	0	overlapping	exonic
MSTRG.28363.3	OS_LNC0817	antisense	genic	0	overlapping	exonic
MSTRG.2838.4	OS_LNC0818	sense	genic	0	nested	exonic
MSTRG.28413.4	OS_LNC0819	sense	genic	0	overlapping	exonic
MSTRG.28426.1	OS_LNC0820	antisense	intergenic	55809	divergent	upstream
MSTRG.28453.3	OS_LNC0821	sense	genic	0	containing	exonic
MSTRG.28470.2	OS_LNC0822	sense	intergenic	6328	same_strand	upstream
MSTRG.28479.2	OS_LNC0823	antisense	genic	0	overlapping	exonic
MSTRG.28488.1	OS_LNC0824	antisense	intergenic	20381	divergent	upstream
MSTRG.28491.2	OS_LNC0825	sense	genic	0	containing	exonic
MSTRG.28512.5	OS_LNC0826	sense	genic	0	overlapping	exonic
MSTRG.28524.1	OS_LNC0827	antisense	genic	0	overlapping	exonic
MSTRG.28524.2	OS_LNC0828	antisense	intergenic	7	convergent	downstream
MSTRG.28582.1	OS_LNC0829	antisense	intergenic	1	divergent	upstream
MSTRG.28606.1	OS_LNC0830	sense	intergenic	24326	same_strand	downstream
MSTRG.28647.1	OS_LNC0831	antisense	genic	0	nested	exonic
MSTRG.28715.1	OS_LNC0832	sense	genic	0	containing	exonic
MSTRG.28717.1	OS_LNC0833	antisense	intergenic	11355	convergent	downstream
MSTRG.28718.1	OS_LNC0834	antisense	intergenic	7849	convergent	downstream
MSTRG.28718.2	OS_LNC0835	antisense	intergenic	8053	convergent	downstream
MSTRG.28720.1	OS_LNC0836	sense	intergenic	3148	same_strand	upstream
MSTRG.28720.2	OS_LNC0837	sense	intergenic	3148	same_strand	upstream
MSTRG.28770.1	OS_LNC0838	antisense	intergenic	4622	convergent	downstream
MSTRG.28776.1	OS_LNC0839	antisense	intergenic	575	convergent	downstream
MSTRG.28776.5	OS_LNC0840	antisense	intergenic	4978	convergent	downstream
MSTRG.28792.2	OS_LNC0841	sense	genic	0	nested	exonic
MSTRG.28806.1	OS_LNC0842	antisense	genic	0	overlapping	exonic
MSTRG.28833.17	OS_LNC0843	antisense	intergenic	12493	divergent	upstream
MSTRG.28857.1	OS_LNC0844	sense	intergenic	2973	same_strand	downstream
MSTRG.28857.3	OS_LNC0845	sense	intergenic	3199	same_strand	downstream
MSTRG.28896.1	OS_LNC0846	antisense	intergenic	3534	divergent	upstream
MSTRG.28904.1	OS_LNC0847	sense	intergenic	3191	same_strand	downstream
MSTRG.28947.2	OS_LNC0848	sense	genic	0	containing	exonic
MSTRG.28972.1	OS_LNC0849	antisense	intergenic	5116	convergent	downstream
MSTRG.28972.2	OS_LNC0850	antisense	intergenic	5116	convergent	downstream
MSTRG.2899.1	OS_LNC0851	antisense	intergenic	1044	convergent	downstream
MSTRG.2899.2	OS_LNC0852	antisense	intergenic	1044	convergent	downstream
MSTRG.29044.4	OS_LNC0853	sense	genic	0	containing	exonic
MSTRG.29092.1	OS_LNC0854	antisense	intergenic	733	divergent	upstream
MSTRG.29112.2	OS_LNC0855	sense	intergenic	1371	same_strand	downstream
MSTRG.29153.2	OS_LNC0856	sense	genic	0	overlapping	exonic
MSTRG.29160.1	OS_LNC0857	sense	intergenic	3726	same_strand	upstream
MSTRG.29185.3	OS_LNC0858	sense	genic	0	nested	exonic
MSTRG.29241.2	OS_LNC0859	sense	genic	0	nested	exonic
MSTRG.29254.2	OS_LNC0860	sense	intergenic	89	same_strand	upstream
MSTRG.29263.1	OS_LNC0861	sense	genic	0	containing	exonic
MSTRG.29263.2	OS_LNC0862	sense	genic	0	containing	exonic
MSTRG.2928.1	OS_LNC0863	antisense	intergenic	7620	divergent	upstream
MSTRG.29283.3	OS_LNC0864	sense	genic	0	overlapping	exonic
MSTRG.29290.1	OS_LNC0865	antisense	genic	0	overlapping	exonic
MSTRG.29292.1	OS_LNC0866	antisense	intergenic	6	convergent	downstream
MSTRG.29362.1	OS_LNC0867	antisense	genic	0	nested	exonic
MSTRG.29414.1	OS_LNC0868	antisense	genic	0	overlapping	exonic
MSTRG.29431.1	OS_LNC0869	antisense	intergenic	1801	divergent	upstream
MSTRG.29454.3	OS_LNC0870	sense	genic	0	nested	exonic
MSTRG.29530.8	OS_LNC0871	sense	genic	0	overlapping	exonic
MSTRG.29597.3	OS_LNC0872	sense	genic	0	nested	exonic
MSTRG.29668.1	OS_LNC0873	antisense	genic	0	containing	intronic
MSTRG.29752.1	OS_LNC0874	antisense	intergenic	173	convergent	downstream
MSTRG.298.1	OS_LNC0875	sense	genic	0	containing	exonic
MSTRG.29800.4	OS_LNC0876	sense	genic	0	overlapping	exonic
MSTRG.29846.1	OS_LNC0877	sense	genic	0	containing	exonic
MSTRG.30018.2	OS_LNC0878	antisense	intergenic	58	convergent	downstream
MSTRG.30088.1	OS_LNC0879	sense	genic	0	containing	exonic
MSTRG.30097.1	OS_LNC0880	sense	genic	0	overlapping	exonic
MSTRG.30194.1	OS_LNC0881	sense	genic	0	containing	exonic
MSTRG.30198.1	OS_LNC0882	antisense	genic	0	containing	intronic
MSTRG.3024.1	OS_LNC0883	antisense	genic	0	overlapping	exonic
MSTRG.30249.1	OS_LNC0884	sense	intergenic	2492	same_strand	upstream
MSTRG.3026.1	OS_LNC0885	sense	genic	0	containing	exonic
MSTRG.30341.4	OS_LNC0886	sense	genic	0	nested	exonic
MSTRG.30375.1	OS_LNC0887	sense	genic	0	containing	exonic
MSTRG.30382.5	OS_LNC0888	sense	genic	0	nested	exonic
MSTRG.30403.1	OS_LNC0889	antisense	intergenic	305	divergent	upstream
MSTRG.30403.2	OS_LNC0890	antisense	intergenic	305	divergent	upstream
MSTRG.30405.1	OS_LNC0891	antisense	intergenic	161	convergent	downstream
MSTRG.30406.1	OS_LNC0892	sense	intergenic	6515	same_strand	downstream
MSTRG.30418.1	OS_LNC0893	sense	intergenic	436	same_strand	upstream
MSTRG.30435.1	OS_LNC0894	antisense	intergenic	599	divergent	upstream
MSTRG.30437.1	OS_LNC0895	sense	intergenic	383	same_strand	downstream
MSTRG.30437.2	OS_LNC0896	sense	intergenic	1010	same_strand	downstream
MSTRG.30437.3	OS_LNC0897	sense	intergenic	2412	same_strand	upstream
MSTRG.3048.1	OS_LNC0898	antisense	intergenic	993	divergent	upstream
MSTRG.30517.1	OS_LNC0899	antisense	intergenic	13	divergent	upstream
MSTRG.30552.1	OS_LNC0900	sense	genic	0	containing	exonic
MSTRG.30578.1	OS_LNC0901	antisense	intergenic	1718	convergent	downstream
MSTRG.30581.3	OS_LNC0902	sense	genic	0	containing	exonic
MSTRG.30594.1	OS_LNC0903	sense	genic	0	containing	exonic
MSTRG.30689.1	OS_LNC0904	antisense	genic	0	overlapping	exonic
MSTRG.30700.1	OS_LNC0905	sense	genic	0	containing	exonic
MSTRG.30755.1	OS_LNC0906	antisense	genic	0	nested	exonic
MSTRG.30799.1	OS_LNC0907	antisense	genic	0	nested	exonic
MSTRG.30803.1	OS_LNC0908	antisense	genic	0	overlapping	exonic
MSTRG.30859.3	OS_LNC0909	sense	genic	0	overlapping	exonic
MSTRG.30859.4	OS_LNC0910	sense	genic	0	nested	exonic
MSTRG.30911.5	OS_LNC0911	sense	genic	0	overlapping	exonic
MSTRG.30920.3	OS_LNC0912	sense	genic	0	containing	exonic
MSTRG.30920.4	OS_LNC0913	sense	genic	0	containing	exonic
MSTRG.3100.1	OS_LNC0914	antisense	intergenic	3159	divergent	upstream
MSTRG.31030.1	OS_LNC0915	antisense	genic	0	overlapping	exonic
MSTRG.31064.1	OS_LNC0916	antisense	genic	0	nested	exonic
MSTRG.31101.1	OS_LNC0917	antisense	genic	0	overlapping	exonic
MSTRG.31130.1	OS_LNC0918	sense	intergenic	779	same_strand	downstream
MSTRG.31138.5	OS_LNC0919	sense	intergenic	333	same_strand	downstream
MSTRG.31192.2	OS_LNC0920	sense	genic	0	nested	exonic
MSTRG.31193.1	OS_LNC0921	sense	genic	0	nested	intronic
MSTRG.31201.3	OS_LNC0922	antisense	genic	0	nested	exonic
MSTRG.31205.5	OS_LNC0923	sense	genic	0	overlapping	exonic
MSTRG.31211.9	OS_LNC0924	sense	genic	0	overlapping	exonic
MSTRG.31328.1	OS_LNC0925	antisense	genic	0	overlapping	exonic
MSTRG.31328.2	OS_LNC0926	antisense	genic	0	overlapping	exonic
MSTRG.31330.1	OS_LNC0927	antisense	genic	0	nested	exonic
MSTRG.31352.1	OS_LNC0928	sense	genic	0	containing	exonic
MSTRG.31358.1	OS_LNC0929	antisense	genic	0	nested	exonic
MSTRG.31448.1	OS_LNC0930	antisense	genic	0	overlapping	exonic
MSTRG.31481.2	OS_LNC0931	sense	genic	0	nested	exonic
MSTRG.31549.1	OS_LNC0932	antisense	genic	0	overlapping	exonic
MSTRG.31583.1	OS_LNC0933	sense	genic	0	containing	exonic
MSTRG.3169.1	OS_LNC0934	sense	intergenic	892	same_strand	downstream
MSTRG.31793.1	OS_LNC0935	antisense	intergenic	1145	divergent	upstream
MSTRG.31794.1	OS_LNC0936	antisense	genic	0	overlapping	exonic
MSTRG.31808.1	OS_LNC0937	antisense	genic	0	overlapping	intronic
MSTRG.31858.1	OS_LNC0938	sense	genic	0	containing	exonic
MSTRG.31858.2	OS_LNC0939	sense	genic	0	containing	exonic
MSTRG.31978.1	OS_LNC0940	sense	intergenic	1051	same_strand	upstream
MSTRG.31994.1	OS_LNC0941	sense	intergenic	7604	same_strand	downstream
MSTRG.32007.1	OS_LNC0942	antisense	genic	0	overlapping	exonic
MSTRG.32063.1	OS_LNC0943	sense	intergenic	1752	same_strand	upstream
MSTRG.32071.1	OS_LNC0944	antisense	genic	0	overlapping	exonic
MSTRG.32087.1	OS_LNC0945	antisense	genic	0	overlapping	exonic
MSTRG.32098.1	OS_LNC0946	sense	intergenic	11521	same_strand	upstream
MSTRG.32100.1	OS_LNC0947	antisense	intergenic	10998	divergent	upstream
MSTRG.32150.3	OS_LNC0948	sense	genic	0	overlapping	exonic
MSTRG.32199.2	OS_LNC0949	sense	genic	0	nested	exonic
MSTRG.32200.2	OS_LNC0950	antisense	intergenic	437	divergent	upstream
MSTRG.32221.1	OS_LNC0951	antisense	genic	0	containing	intronic
MSTRG.32221.2	OS_LNC0952	antisense	genic	0	overlapping	exonic
MSTRG.32223.1	OS_LNC0953	antisense	genic	0	nested	exonic
MSTRG.32232.1	OS_LNC0954	sense	intergenic	4869	same_strand	upstream
MSTRG.32290.1	OS_LNC0955	antisense	genic	0	overlapping	exonic
MSTRG.32303.1	OS_LNC0956	antisense	genic	0	overlapping	exonic
MSTRG.32324.1	OS_LNC0957	sense	intergenic	248	same_strand	upstream
MSTRG.3233.1	OS_LNC0958	sense	intergenic	3880	same_strand	upstream
MSTRG.3233.3	OS_LNC0959	sense	intergenic	4230	same_strand	upstream
MSTRG.32338.1	OS_LNC0960	sense	genic	0	containing	exonic
MSTRG.32360.1	OS_LNC0961	sense	genic	0	overlapping	exonic
MSTRG.32381.1	OS_LNC0962	sense	intergenic	3129	same_strand	upstream
MSTRG.3240.3	OS_LNC0963	antisense	genic	0	overlapping	exonic
MSTRG.32513.1	OS_LNC0964	sense	intergenic	344	same_strand	upstream
MSTRG.32599.1	OS_LNC0965	antisense	intergenic	410	divergent	upstream
MSTRG.32624.1	OS_LNC0966	sense	intergenic	4222	same_strand	downstream
MSTRG.32762.1	OS_LNC0967	sense	intergenic	2286	same_strand	upstream
MSTRG.32762.2	OS_LNC0968	sense	intergenic	2286	same_strand	upstream
MSTRG.32762.7	OS_LNC0969	sense	intergenic	2286	same_strand	upstream
MSTRG.32762.8	OS_LNC0970	sense	intergenic	2286	same_strand	upstream
MSTRG.3281.1	OS_LNC0971	antisense	intergenic	1728	divergent	upstream
MSTRG.3281.2	OS_LNC0972	antisense	intergenic	1731	divergent	upstream
MSTRG.32876.1	OS_LNC0973	antisense	intergenic	948	convergent	downstream
MSTRG.32876.2	OS_LNC0974	antisense	intergenic	961	convergent	downstream
MSTRG.32876.4	OS_LNC0975	antisense	intergenic	961	convergent	downstream
MSTRG.32876.7	OS_LNC0976	antisense	intergenic	1042	convergent	downstream
MSTRG.32976.1	OS_LNC0977	sense	genic	0	containing	exonic
MSTRG.33034.1	OS_LNC0978	sense	intergenic	15807	same_strand	downstream
MSTRG.33051.1	OS_LNC0979	sense	intergenic	4135	same_strand	downstream
MSTRG.33063.1	OS_LNC0980	antisense	genic	0	overlapping	exonic
MSTRG.33063.2	OS_LNC0981	antisense	genic	0	overlapping	exonic
MSTRG.33138.1	OS_LNC0982	antisense	genic	0	containing	intronic
MSTRG.33157.1	OS_LNC0983	antisense	intergenic	260	convergent	downstream
MSTRG.33191.1	OS_LNC0984	antisense	intergenic	20002	convergent	downstream
MSTRG.33204.1	OS_LNC0985	sense	intergenic	2973	same_strand	downstream
MSTRG.33204.4	OS_LNC0986	sense	intergenic	3041	same_strand	downstream
MSTRG.33213.1	OS_LNC0987	sense	intergenic	1933	same_strand	upstream
MSTRG.33214.1	OS_LNC0988	sense	genic	0	containing	exonic
MSTRG.33263.3	OS_LNC0989	sense	intergenic	581	same_strand	upstream
MSTRG.33305.1	OS_LNC0990	sense	genic	0	containing	exonic
MSTRG.33307.1	OS_LNC0991	sense	intergenic	56773	same_strand	upstream
MSTRG.33312.1	OS_LNC0992	antisense	intergenic	25015	convergent	downstream
MSTRG.33346.4	OS_LNC0993	antisense	genic	0	nested	exonic
MSTRG.33346.6	OS_LNC0994	antisense	genic	0	nested	exonic
MSTRG.33348.1	OS_LNC0995	antisense	genic	0	nested	exonic
MSTRG.33381.1	OS_LNC0996	sense	genic	0	containing	exonic
MSTRG.33381.10	OS_LNC0997	sense	genic	0	containing	exonic
MSTRG.33381.11	OS_LNC0998	sense	genic	0	containing	exonic
MSTRG.33381.6	OS_LNC0999	sense	genic	0	containing	exonic
MSTRG.33381.7	OS_LNC1000	sense	genic	0	containing	exonic
MSTRG.3341.1	OS_LNC1001	sense	genic	0	containing	exonic
MSTRG.33436.1	OS_LNC1002	sense	genic	0	containing	exonic
MSTRG.33489.1	OS_LNC1003	sense	intergenic	5809	same_strand	upstream
MSTRG.335.1	OS_LNC1004	antisense	intergenic	121	divergent	upstream
MSTRG.33500.1	OS_LNC1005	sense	intergenic	40883	same_strand	downstream
MSTRG.33503.1	OS_LNC1006	antisense	intergenic	11837	divergent	upstream
MSTRG.33511.1	OS_LNC1007	sense	genic	0	containing	exonic
MSTRG.33511.3	OS_LNC1008	sense	genic	0	containing	exonic
MSTRG.33511.4	OS_LNC1009	sense	genic	0	containing	exonic
MSTRG.33529.1	OS_LNC1010	sense	intergenic	15155	same_strand	upstream
MSTRG.33587.1	OS_LNC1011	sense	intergenic	777	same_strand	downstream
MSTRG.33620.1	OS_LNC1012	sense	genic	0	containing	exonic
MSTRG.33671.1	OS_LNC1013	antisense	genic	0	overlapping	exonic
MSTRG.33680.1	OS_LNC1014	antisense	genic	0	overlapping	exonic
MSTRG.33691.1	OS_LNC1015	sense	genic	0	containing	exonic
MSTRG.33763.1	OS_LNC1016	sense	intergenic	9279	same_strand	upstream
MSTRG.33763.2	OS_LNC1017	sense	intergenic	9279	same_strand	upstream
MSTRG.33780.4	OS_LNC1018	sense	genic	0	nested	exonic
MSTRG.33780.5	OS_LNC1019	sense	genic	0	nested	exonic
MSTRG.33784.2	OS_LNC1020	antisense	genic	0	overlapping	exonic
MSTRG.33822.3	OS_LNC1021	antisense	intergenic	6598	divergent	upstream
MSTRG.33822.4	OS_LNC1022	antisense	intergenic	6705	divergent	upstream
MSTRG.33983.1	OS_LNC1023	antisense	intergenic	715	convergent	downstream
MSTRG.33983.2	OS_LNC1024	antisense	intergenic	1424	convergent	downstream
MSTRG.34011.1	OS_LNC1025	sense	genic	0	containing	exonic
MSTRG.34011.2	OS_LNC1026	sense	genic	0	containing	exonic
MSTRG.34129.2	OS_LNC1027	antisense	genic	0	nested	exonic
MSTRG.34155.2	OS_LNC1028	sense	genic	0	containing	exonic
MSTRG.34155.3	OS_LNC1029	sense	genic	0	containing	exonic
MSTRG.34226.1	OS_LNC1030	antisense	genic	0	nested	exonic
MSTRG.34230.1	OS_LNC1031	antisense	genic	0	nested	exonic
MSTRG.34231.1	OS_LNC1032	antisense	genic	0	nested	exonic
MSTRG.3424.1	OS_LNC1033	sense	genic	0	overlapping	exonic
MSTRG.3424.2	OS_LNC1034	sense	genic	0	overlapping	exonic
MSTRG.34248.1	OS_LNC1035	antisense	intergenic	2296	divergent	upstream
MSTRG.34248.2	OS_LNC1036	antisense	intergenic	2313	divergent	upstream
MSTRG.34368.2	OS_LNC1037	sense	genic	0	overlapping	exonic
MSTRG.34372.1	OS_LNC1038	antisense	intergenic	2112	divergent	upstream
MSTRG.34372.3	OS_LNC1039	antisense	intergenic	2118	divergent	upstream
MSTRG.34385.2	OS_LNC1040	sense	genic	0	containing	exonic
MSTRG.34433.1	OS_LNC1041	sense	intergenic	487	same_strand	downstream
MSTRG.34574.1	OS_LNC1042	sense	intergenic	2336	same_strand	upstream
MSTRG.34578.1	OS_LNC1043	antisense	genic	0	nested	exonic
MSTRG.34578.2	OS_LNC1044	antisense	genic	0	nested	exonic
MSTRG.34578.3	OS_LNC1045	antisense	genic	0	nested	exonic
MSTRG.34578.5	OS_LNC1046	antisense	genic	0	nested	intronic
MSTRG.34641.3	OS_LNC1047	sense	genic	0	nested	exonic
MSTRG.34731.1	OS_LNC1048	antisense	intergenic	568	convergent	downstream
MSTRG.3474.1	OS_LNC1049	sense	intergenic	754	same_strand	upstream
MSTRG.34757.1	OS_LNC1050	sense	genic	0	containing	exonic
MSTRG.34757.2	OS_LNC1051	sense	genic	0	containing	exonic
MSTRG.34757.3	OS_LNC1052	sense	genic	0	containing	exonic
MSTRG.34840.1	OS_LNC1053	antisense	genic	0	overlapping	intronic
MSTRG.34840.2	OS_LNC1054	antisense	intergenic	40	convergent	downstream
MSTRG.34846.7	OS_LNC1055	sense	genic	0	nested	exonic
MSTRG.34863.1	OS_LNC1056	sense	genic	0	containing	exonic
MSTRG.34882.2	OS_LNC1057	sense	genic	0	overlapping	exonic
MSTRG.34882.3	OS_LNC1058	sense	genic	0	overlapping	exonic
MSTRG.34888.1	OS_LNC1059	antisense	intergenic	1161	divergent	upstream
MSTRG.34889.1	OS_LNC1060	antisense	intergenic	1582	convergent	downstream
MSTRG.34899.1	OS_LNC1061	antisense	genic	0	nested	exonic
MSTRG.34934.1	OS_LNC1062	antisense	genic	0	overlapping	exonic
MSTRG.34950.5	OS_LNC1063	sense	genic	0	overlapping	exonic
MSTRG.34971.3	OS_LNC1064	sense	genic	0	overlapping	exonic
MSTRG.34981.1	OS_LNC1065	antisense	genic	0	overlapping	exonic
MSTRG.35001.3	OS_LNC1066	sense	genic	0	containing	exonic
MSTRG.35007.2	OS_LNC1067	sense	genic	0	nested	exonic
MSTRG.35034.1	OS_LNC1068	sense	intergenic	1663	same_strand	downstream
MSTRG.35052.1	OS_LNC1069	sense	intergenic	17122	same_strand	downstream
MSTRG.35062.6	OS_LNC1070	sense	genic	0	containing	exonic
MSTRG.35270.1	OS_LNC1071	antisense	genic	0	nested	exonic
MSTRG.35279.1	OS_LNC1072	sense	intergenic	238	same_strand	downstream
MSTRG.35285.2	OS_LNC1073	sense	genic	0	containing	exonic
MSTRG.3534.1	OS_LNC1074	antisense	intergenic	197	divergent	upstream
MSTRG.35396.1	OS_LNC1075	sense	genic	0	containing	exonic
MSTRG.35396.2	OS_LNC1076	sense	genic	0	containing	exonic
MSTRG.35442.1	OS_LNC1077	sense	genic	0	overlapping	exonic
MSTRG.35462.5	OS_LNC1078	sense	genic	0	overlapping	exonic
MSTRG.35475.1	OS_LNC1079	antisense	genic	0	overlapping	exonic
MSTRG.35486.2	OS_LNC1080	sense	genic	0	containing	exonic
MSTRG.35518.5	OS_LNC1081	sense	genic	0	nested	exonic
MSTRG.35718.11	OS_LNC1082	sense	genic	0	nested	exonic
MSTRG.35718.12	OS_LNC1083	sense	genic	0	overlapping	exonic
MSTRG.35766.1	OS_LNC1084	antisense	intergenic	11550	divergent	upstream
MSTRG.35783.1	OS_LNC1085	antisense	intergenic	235	divergent	upstream
MSTRG.35791.2	OS_LNC1086	sense	intergenic	255	same_strand	upstream
MSTRG.35806.3	OS_LNC1087	sense	genic	0	containing	exonic
MSTRG.35813.1	OS_LNC1088	antisense	genic	0	overlapping	exonic
MSTRG.35837.1	OS_LNC1089	sense	intergenic	2225	same_strand	upstream
MSTRG.35837.2	OS_LNC1090	sense	intergenic	2407	same_strand	upstream
MSTRG.35869.3	OS_LNC1091	sense	intergenic	1577	same_strand	upstream
MSTRG.35870.1	OS_LNC1092	sense	intergenic	1499	same_strand	upstream
MSTRG.3592.1	OS_LNC1093	antisense	intergenic	4574	divergent	upstream
MSTRG.35925.1	OS_LNC1094	sense	intergenic	115	same_strand	upstream
MSTRG.35935.2	OS_LNC1095	sense	intergenic	7840	same_strand	upstream
MSTRG.3594.2	OS_LNC1096	sense	genic	0	nested	exonic
MSTRG.35941.1	OS_LNC1097	sense	intergenic	4425	same_strand	upstream
MSTRG.3606.1	OS_LNC1098	antisense	intergenic	5829	convergent	downstream
MSTRG.3606.2	OS_LNC1099	antisense	intergenic	5833	convergent	downstream
MSTRG.36072.1	OS_LNC1100	antisense	intergenic	5	convergent	downstream
MSTRG.36077.1	OS_LNC1101	antisense	genic	0	overlapping	exonic
MSTRG.36141.2	OS_LNC1102	antisense	intergenic	1161	convergent	downstream
MSTRG.36192.2	OS_LNC1103	sense	genic	0	containing	exonic
MSTRG.36217.1	OS_LNC1104	antisense	genic	0	nested	exonic
MSTRG.36217.3	OS_LNC1105	antisense	genic	0	overlapping	exonic
MSTRG.36217.4	OS_LNC1106	antisense	genic	0	overlapping	exonic
MSTRG.36231.1	OS_LNC1107	sense	intergenic	506	same_strand	upstream
MSTRG.36231.2	OS_LNC1108	sense	intergenic	506	same_strand	upstream
MSTRG.36232.1	OS_LNC1109	sense	intergenic	2712	same_strand	downstream
MSTRG.36288.4	OS_LNC1110	antisense	genic	0	overlapping	exonic
MSTRG.36288.6	OS_LNC1111	antisense	genic	0	overlapping	exonic
MSTRG.36289.1	OS_LNC1112	antisense	genic	0	nested	exonic
MSTRG.36296.1	OS_LNC1113	antisense	intergenic	390	convergent	downstream
MSTRG.36310.5	OS_LNC1114	sense	genic	0	nested	exonic
MSTRG.36315.3	OS_LNC1115	sense	genic	0	containing	exonic
MSTRG.3632.1	OS_LNC1116	sense	intergenic	2818	same_strand	downstream
MSTRG.3633.4	OS_LNC1117	sense	genic	0	nested	exonic
MSTRG.3635.1	OS_LNC1118	antisense	genic	0	nested	exonic
MSTRG.36519.1	OS_LNC1119	sense	genic	0	containing	exonic
MSTRG.36533.1	OS_LNC1120	antisense	genic	0	nested	exonic
MSTRG.36553.1	OS_LNC1121	antisense	genic	0	nested	exonic
MSTRG.36553.2	OS_LNC1122	antisense	genic	0	nested	exonic
MSTRG.36559.1	OS_LNC1123	sense	genic	0	containing	exonic
MSTRG.36586.1	OS_LNC1124	sense	genic	0	containing	exonic
MSTRG.36623.1	OS_LNC1125	antisense	genic	0	nested	exonic
MSTRG.36627.1	OS_LNC1126	antisense	intergenic	50	convergent	downstream
MSTRG.36627.10	OS_LNC1127	antisense	intergenic	50	convergent	downstream
MSTRG.36627.11	OS_LNC1128	antisense	intergenic	50	convergent	downstream
MSTRG.36627.12	OS_LNC1129	antisense	intergenic	50	convergent	downstream
MSTRG.36627.14	OS_LNC1130	antisense	intergenic	50	convergent	downstream
MSTRG.36627.15	OS_LNC1131	antisense	intergenic	50	convergent	downstream
MSTRG.36627.16	OS_LNC1132	antisense	intergenic	50	convergent	downstream
MSTRG.36627.2	OS_LNC1133	antisense	intergenic	50	convergent	downstream
MSTRG.36627.3	OS_LNC1134	antisense	intergenic	50	convergent	downstream
MSTRG.36627.4	OS_LNC1135	antisense	intergenic	50	convergent	downstream
MSTRG.36627.5	OS_LNC1136	antisense	intergenic	50	convergent	downstream
MSTRG.36627.7	OS_LNC1137	antisense	intergenic	50	convergent	downstream
MSTRG.36750.1	OS_LNC1138	antisense	intergenic	866	convergent	downstream
MSTRG.36771.1	OS_LNC1139	antisense	intergenic	1668	divergent	upstream
MSTRG.36873.2	OS_LNC1140	antisense	genic	0	containing	intronic
MSTRG.36953.1	OS_LNC1141	antisense	genic	0	nested	intronic
MSTRG.36982.1	OS_LNC1142	sense	intergenic	5677	same_strand	downstream
MSTRG.37006.1	OS_LNC1143	sense	genic	0	containing	exonic
MSTRG.37010.1	OS_LNC1144	antisense	genic	0	overlapping	exonic
MSTRG.37085.2	OS_LNC1145	sense	genic	0	containing	exonic
MSTRG.37093.1	OS_LNC1146	sense	genic	0	containing	exonic
MSTRG.37101.1	OS_LNC1147	antisense	intergenic	1967	convergent	downstream
MSTRG.37109.1	OS_LNC1148	sense	intergenic	7471	same_strand	upstream
MSTRG.37109.2	OS_LNC1149	sense	intergenic	7471	same_strand	upstream
MSTRG.37118.1	OS_LNC1150	antisense	genic	0	overlapping	exonic
MSTRG.37118.3	OS_LNC1151	antisense	genic	0	overlapping	exonic
MSTRG.37196.5	OS_LNC1152	sense	genic	0	overlapping	exonic
MSTRG.37290.1	OS_LNC1153	antisense	genic	0	overlapping	exonic
MSTRG.37300.1	OS_LNC1154	antisense	intergenic	139	divergent	upstream
MSTRG.37352.1	OS_LNC1155	antisense	intergenic	1	divergent	upstream
MSTRG.37444.1	OS_LNC1156	sense	genic	0	overlapping	exonic
MSTRG.37447.1	OS_LNC1157	sense	intergenic	2327	same_strand	downstream
MSTRG.37485.1	OS_LNC1158	sense	intergenic	1235	same_strand	downstream
MSTRG.37516.1	OS_LNC1159	antisense	intergenic	604	divergent	upstream
MSTRG.37530.2	OS_LNC1160	sense	intergenic	995	same_strand	downstream
MSTRG.37560.1	OS_LNC1161	antisense	intergenic	5131	divergent	upstream
MSTRG.37575.2	OS_LNC1162	sense	genic	0	containing	exonic
MSTRG.37575.3	OS_LNC1163	sense	genic	0	containing	exonic
MSTRG.3758.1	OS_LNC1164	sense	intergenic	979	same_strand	upstream
MSTRG.3758.2	OS_LNC1165	sense	intergenic	987	same_strand	upstream
MSTRG.3758.3	OS_LNC1166	sense	intergenic	987	same_strand	upstream
MSTRG.3758.4	OS_LNC1167	sense	intergenic	987	same_strand	upstream
MSTRG.37595.1	OS_LNC1168	sense	intergenic	15890	same_strand	downstream
MSTRG.37595.2	OS_LNC1169	sense	intergenic	15890	same_strand	downstream
MSTRG.37610.1	OS_LNC1170	antisense	intergenic	3647	convergent	downstream
MSTRG.37612.1	OS_LNC1171	sense	intergenic	1519	same_strand	upstream
MSTRG.37621.1	OS_LNC1172	sense	intergenic	2628	same_strand	downstream
MSTRG.37630.2	OS_LNC1173	sense	genic	0	overlapping	exonic
MSTRG.37637.1	OS_LNC1174	sense	intergenic	24826	same_strand	upstream
MSTRG.37674.1	OS_LNC1175	antisense	genic	0	overlapping	exonic
MSTRG.37686.3	OS_LNC1176	sense	genic	0	nested	exonic
MSTRG.37699.1	OS_LNC1177	antisense	genic	0	nested	exonic
MSTRG.37699.2	OS_LNC1178	antisense	genic	0	nested	exonic
MSTRG.37703.1	OS_LNC1179	sense	intergenic	1405	same_strand	upstream
MSTRG.37703.2	OS_LNC1180	sense	intergenic	1405	same_strand	upstream
MSTRG.37703.5	OS_LNC1181	sense	intergenic	1405	same_strand	upstream
MSTRG.37758.6	OS_LNC1182	sense	genic	0	nested	exonic
MSTRG.37759.1	OS_LNC1183	antisense	genic	0	containing	exonic
MSTRG.37759.3	OS_LNC1184	sense	genic	0	containing	exonic
MSTRG.37763.1	OS_LNC1185	sense	intergenic	1975	same_strand	downstream
MSTRG.37763.2	OS_LNC1186	sense	intergenic	1976	same_strand	downstream
MSTRG.37767.1	OS_LNC1187	antisense	intergenic	1792	convergent	downstream
MSTRG.37794.1	OS_LNC1188	sense	genic	0	containing	exonic
MSTRG.37803.3	OS_LNC1189	antisense	intergenic	859	divergent	upstream
MSTRG.37837.1	OS_LNC1190	sense	intergenic	369	same_strand	upstream
MSTRG.37885.1	OS_LNC1191	antisense	intergenic	1761	divergent	upstream
MSTRG.37904.1	OS_LNC1192	antisense	intergenic	22749	divergent	upstream
MSTRG.37919.1	OS_LNC1193	antisense	intergenic	10302	divergent	upstream
MSTRG.37923.1	OS_LNC1194	antisense	intergenic	11131	convergent	downstream
MSTRG.37941.1	OS_LNC1195	antisense	intergenic	11533	divergent	upstream
MSTRG.37942.1	OS_LNC1196	antisense	intergenic	18105	divergent	upstream
MSTRG.37959.1	OS_LNC1197	sense	intergenic	24256	same_strand	downstream
MSTRG.37959.2	OS_LNC1198	sense	intergenic	24286	same_strand	downstream
MSTRG.37979.1	OS_LNC1199	antisense	intergenic	18562	convergent	downstream
MSTRG.37990.1	OS_LNC1200	sense	intergenic	8037	same_strand	upstream
MSTRG.3800.1	OS_LNC1201	sense	intergenic	1985	same_strand	upstream
MSTRG.38024.1	OS_LNC1202	antisense	intergenic	5852	convergent	downstream
MSTRG.38024.2	OS_LNC1203	antisense	intergenic	5852	convergent	downstream
MSTRG.38024.3	OS_LNC1204	antisense	intergenic	5852	convergent	downstream
MSTRG.38024.4	OS_LNC1205	antisense	intergenic	5852	convergent	downstream
MSTRG.38024.5	OS_LNC1206	antisense	intergenic	5852	convergent	downstream
MSTRG.38024.6	OS_LNC1207	antisense	intergenic	5852	convergent	downstream
MSTRG.38039.1	OS_LNC1208	antisense	intergenic	21744	divergent	upstream
MSTRG.38039.2	OS_LNC1209	antisense	intergenic	21751	divergent	upstream
MSTRG.38040.1	OS_LNC1210	sense	intergenic	20722	same_strand	downstream
MSTRG.38040.2	OS_LNC1211	sense	intergenic	20944	same_strand	downstream
MSTRG.38057.1	OS_LNC1212	antisense	genic	0	nested	exonic
MSTRG.38057.2	OS_LNC1213	antisense	genic	0	nested	exonic
MSTRG.38058.1	OS_LNC1214	sense	genic	0	containing	exonic
MSTRG.38083.1	OS_LNC1215	antisense	intergenic	979	divergent	upstream
MSTRG.38093.1	OS_LNC1216	antisense	genic	0	containing	intronic
MSTRG.38108.1	OS_LNC1217	sense	intergenic	7859	same_strand	downstream
MSTRG.38109.1	OS_LNC1218	sense	genic	0	containing	exonic
MSTRG.38109.3	OS_LNC1219	sense	genic	0	containing	exonic
MSTRG.38109.9	OS_LNC1220	sense	genic	0	containing	exonic
MSTRG.38117.1	OS_LNC1221	sense	genic	0	containing	exonic
MSTRG.38162.1	OS_LNC1222	sense	intergenic	16102	same_strand	downstream
MSTRG.38173.1	OS_LNC1223	sense	intergenic	1547	same_strand	upstream
MSTRG.38262.1	OS_LNC1224	antisense	intergenic	5823	convergent	downstream
MSTRG.38264.1	OS_LNC1225	antisense	intergenic	1900	divergent	upstream
MSTRG.3836.10	OS_LNC1226	sense	genic	0	containing	exonic
MSTRG.38361.1	OS_LNC1227	sense	genic	0	containing	exonic
MSTRG.38361.2	OS_LNC1228	sense	genic	0	containing	exonic
MSTRG.38476.1	OS_LNC1229	sense	intergenic	3369	same_strand	upstream
MSTRG.38497.9	OS_LNC1230	sense	intergenic	2612	same_strand	upstream
MSTRG.38498.1	OS_LNC1231	antisense	intergenic	2234	divergent	upstream
MSTRG.3854.3	OS_LNC1232	sense	genic	0	nested	exonic
MSTRG.38540.2	OS_LNC1233	sense	intergenic	1574	same_strand	downstream
MSTRG.38599.1	OS_LNC1234	sense	genic	0	containing	exonic
MSTRG.38599.4	OS_LNC1235	sense	genic	0	overlapping	exonic
MSTRG.38612.1	OS_LNC1236	antisense	intergenic	12912	divergent	upstream
MSTRG.38665.2	OS_LNC1237	antisense	genic	0	containing	exonic
MSTRG.38679.1	OS_LNC1238	sense	intergenic	3352	same_strand	upstream
MSTRG.38681.4	OS_LNC1239	sense	genic	0	containing	exonic
MSTRG.38710.1	OS_LNC1240	sense	intergenic	12250	same_strand	downstream
MSTRG.38745.1	OS_LNC1241	sense	intergenic	13218	same_strand	downstream
MSTRG.38854.1	OS_LNC1242	sense	intergenic	8158	same_strand	upstream
MSTRG.38922.1	OS_LNC1243	antisense	genic	0	overlapping	exonic
MSTRG.38922.2	OS_LNC1244	antisense	genic	0	nested	exonic
MSTRG.38925.1	OS_LNC1245	antisense	genic	0	overlapping	exonic
MSTRG.38985.1	OS_LNC1246	sense	genic	0	overlapping	exonic
MSTRG.38988.1	OS_LNC1247	antisense	intergenic	1773	convergent	downstream
MSTRG.39066.1	OS_LNC1248	antisense	genic	0	overlapping	exonic
MSTRG.39129.1	OS_LNC1249	antisense	intergenic	41	divergent	upstream
MSTRG.39129.2	OS_LNC1250	antisense	intergenic	432	divergent	upstream
MSTRG.39159.3	OS_LNC1251	sense	genic	0	nested	exonic
MSTRG.39194.1	OS_LNC1252	antisense	genic	0	nested	exonic
MSTRG.39270.1	OS_LNC1253	sense	intergenic	2307	same_strand	upstream
MSTRG.39270.2	OS_LNC1254	sense	intergenic	1827	same_strand	upstream
MSTRG.39336.2	OS_LNC1255	sense	genic	0	overlapping	exonic
MSTRG.39382.2	OS_LNC1256	sense	genic	0	nested	exonic
MSTRG.39386.1	OS_LNC1257	antisense	intergenic	656	convergent	downstream
MSTRG.39445.2	OS_LNC1258	sense	genic	0	containing	exonic
MSTRG.39504.1	OS_LNC1259	antisense	genic	0	nested	exonic
MSTRG.39574.5	OS_LNC1260	antisense	genic	0	overlapping	exonic
MSTRG.39574.7	OS_LNC1261	antisense	genic	0	overlapping	exonic
MSTRG.39622.1	OS_LNC1262	antisense	intergenic	961	divergent	upstream
MSTRG.39677.1	OS_LNC1263	antisense	genic	0	nested	exonic
MSTRG.39678.1	OS_LNC1264	antisense	genic	0	overlapping	exonic
MSTRG.39678.3	OS_LNC1265	antisense	genic	0	overlapping	exonic
MSTRG.39678.4	OS_LNC1266	antisense	genic	0	overlapping	exonic
MSTRG.39678.5	OS_LNC1267	antisense	genic	0	overlapping	exonic
MSTRG.39678.6	OS_LNC1268	antisense	intergenic	3	divergent	upstream
MSTRG.39719.2	OS_LNC1269	sense	genic	0	overlapping	exonic
MSTRG.39776.1	OS_LNC1270	sense	intergenic	626	same_strand	upstream
MSTRG.39860.1	OS_LNC1271	sense	genic	0	containing	exonic
MSTRG.39862.1	OS_LNC1272	antisense	genic	0	nested	exonic
MSTRG.39905.1	OS_LNC1273	sense	genic	0	containing	exonic
MSTRG.39941.1	OS_LNC1274	antisense	genic	0	overlapping	exonic
MSTRG.39960.3	OS_LNC1275	antisense	genic	0	nested	exonic
MSTRG.39962.1	OS_LNC1276	antisense	genic	0	nested	exonic
MSTRG.39963.1	OS_LNC1277	antisense	genic	0	overlapping	exonic
MSTRG.39964.18	OS_LNC1278	sense	genic	0	overlapping	exonic
MSTRG.39965.1	OS_LNC1279	antisense	genic	0	nested	exonic
MSTRG.39965.2	OS_LNC1280	antisense	genic	0	nested	exonic
MSTRG.39968.1	OS_LNC1281	sense	intergenic	2130	same_strand	upstream
MSTRG.39968.2	OS_LNC1282	sense	intergenic	2130	same_strand	upstream
MSTRG.39969.1	OS_LNC1283	antisense	genic	0	overlapping	exonic
MSTRG.39980.1	OS_LNC1284	antisense	intergenic	796	convergent	downstream
MSTRG.40071.3	OS_LNC1285	sense	genic	0	containing	exonic
MSTRG.40071.8	OS_LNC1286	sense	genic	0	containing	exonic
MSTRG.40077.1	OS_LNC1287	sense	genic	0	containing	exonic
MSTRG.40077.2	OS_LNC1288	sense	genic	0	containing	exonic
MSTRG.40177.2	OS_LNC1289	antisense	intergenic	10014	divergent	upstream
MSTRG.40378.1	OS_LNC1290	antisense	intergenic	403	divergent	upstream
MSTRG.40385.1	OS_LNC1291	sense	intergenic	3261	same_strand	downstream
MSTRG.40385.2	OS_LNC1292	sense	intergenic	3261	same_strand	downstream
MSTRG.40538.1	OS_LNC1293	antisense	intergenic	10	divergent	upstream
MSTRG.40542.1	OS_LNC1294	sense	genic	0	containing	exonic
MSTRG.40552.1	OS_LNC1295	sense	genic	0	containing	exonic
MSTRG.40607.2	OS_LNC1296	sense	genic	0	nested	exonic
MSTRG.40660.1	OS_LNC1297	antisense	intergenic	464	convergent	downstream
MSTRG.40704.1	OS_LNC1298	antisense	intergenic	4767	divergent	upstream
MSTRG.40704.2	OS_LNC1299	antisense	intergenic	4767	divergent	upstream
MSTRG.40704.4	OS_LNC1300	antisense	intergenic	4806	divergent	upstream
MSTRG.40736.1	OS_LNC1301	sense	genic	0	containing	exonic
MSTRG.40760.1	OS_LNC1302	antisense	intergenic	1330	convergent	downstream
MSTRG.40788.4	OS_LNC1303	antisense	genic	0	overlapping	exonic
MSTRG.40833.1	OS_LNC1304	antisense	intergenic	547	convergent	downstream
MSTRG.40833.11	OS_LNC1305	antisense	intergenic	668	convergent	downstream
MSTRG.40833.13	OS_LNC1306	antisense	intergenic	689	convergent	downstream
MSTRG.4085.7	OS_LNC1307	sense	genic	0	overlapping	exonic
MSTRG.40878.1	OS_LNC1308	sense	intergenic	5105	same_strand	upstream
MSTRG.4089.5	OS_LNC1309	sense	genic	0	nested	exonic
MSTRG.40927.1	OS_LNC1310	sense	genic	0	containing	exonic
MSTRG.40927.2	OS_LNC1311	sense	genic	0	containing	exonic
MSTRG.40927.4	OS_LNC1312	sense	genic	0	overlapping	exonic
MSTRG.40932.1	OS_LNC1313	sense	intergenic	448	same_strand	downstream
MSTRG.40988.1	OS_LNC1314	antisense	genic	0	nested	exonic
MSTRG.41017.1	OS_LNC1315	sense	genic	0	containing	exonic
MSTRG.41080.1	OS_LNC1316	antisense	genic	0	nested	intronic
MSTRG.41137.1	OS_LNC1317	sense	intergenic	376	same_strand	upstream
MSTRG.41137.2	OS_LNC1318	antisense	intergenic	1387	divergent	upstream
MSTRG.41182.2	OS_LNC1319	sense	genic	0	overlapping	exonic
MSTRG.41233.1	OS_LNC1320	antisense	intergenic	16495	convergent	downstream
MSTRG.41286.1	OS_LNC1321	sense	intergenic	67247	same_strand	downstream
MSTRG.41286.2	OS_LNC1322	sense	intergenic	67487	same_strand	downstream
MSTRG.41294.1	OS_LNC1323	sense	intergenic	20584	same_strand	downstream
MSTRG.41296.1	OS_LNC1324	sense	genic	0	containing	exonic
MSTRG.41296.2	OS_LNC1325	sense	genic	0	containing	exonic
MSTRG.41333.1	OS_LNC1326	sense	intergenic	1808	same_strand	downstream
MSTRG.41335.1	OS_LNC1327	antisense	intergenic	2057	divergent	upstream
MSTRG.41335.2	OS_LNC1328	antisense	intergenic	2057	divergent	upstream
MSTRG.41373.1	OS_LNC1329	sense	genic	0	containing	exonic
MSTRG.41383.1	OS_LNC1330	sense	intergenic	729	same_strand	upstream
MSTRG.4140.3	OS_LNC1331	sense	genic	0	overlapping	exonic
MSTRG.41435.4	OS_LNC1332	sense	intergenic	189	same_strand	downstream
MSTRG.41455.1	OS_LNC1333	antisense	intergenic	2810	divergent	upstream
MSTRG.41529.1	OS_LNC1334	sense	intergenic	6346	same_strand	upstream
MSTRG.41537.1	OS_LNC1335	antisense	intergenic	10	convergent	downstream
MSTRG.41540.1	OS_LNC1336	sense	intergenic	5838	same_strand	downstream
MSTRG.41550.4	OS_LNC1337	sense	genic	0	containing	exonic
MSTRG.41554.3	OS_LNC1338	sense	genic	0	nested	exonic
MSTRG.41573.1	OS_LNC1339	sense	genic	0	containing	exonic
MSTRG.41586.1	OS_LNC1340	sense	intergenic	11942	same_strand	upstream
MSTRG.41633.2	OS_LNC1341	sense	genic	0	nested	exonic
MSTRG.41697.5	OS_LNC1342	sense	intergenic	4304	same_strand	upstream
MSTRG.41701.1	OS_LNC1343	antisense	intergenic	1626	divergent	upstream
MSTRG.41701.2	OS_LNC1344	antisense	intergenic	1651	divergent	upstream
MSTRG.41753.1	OS_LNC1345	sense	intergenic	16854	same_strand	upstream
MSTRG.41754.1	OS_LNC1346	sense	intergenic	26716	same_strand	upstream
MSTRG.41858.1	OS_LNC1347	antisense	intergenic	4062	convergent	downstream
MSTRG.41871.1	OS_LNC1348	sense	intergenic	544	same_strand	downstream
MSTRG.41871.2	OS_LNC1349	sense	intergenic	592	same_strand	downstream
MSTRG.41882.1	OS_LNC1350	antisense	intergenic	14050	divergent	upstream
MSTRG.41887.1	OS_LNC1351	sense	genic	0	containing	exonic
MSTRG.41901.1	OS_LNC1352	antisense	intergenic	4165	divergent	upstream
MSTRG.41959.2	OS_LNC1353	sense	genic	0	overlapping	exonic
MSTRG.41984.1	OS_LNC1354	sense	intergenic	4829	same_strand	downstream
MSTRG.41988.1	OS_LNC1355	sense	intergenic	10946	same_strand	upstream
MSTRG.42019.1	OS_LNC1356	sense	intergenic	9378	same_strand	upstream
MSTRG.42020.1	OS_LNC1357	sense	intergenic	13529	same_strand	upstream
MSTRG.42042.3	OS_LNC1358	sense	genic	0	containing	exonic
MSTRG.42047.1	OS_LNC1359	sense	intergenic	2214	same_strand	upstream
MSTRG.42072.6	OS_LNC1360	sense	genic	0	nested	exonic
MSTRG.42091.1	OS_LNC1361	sense	genic	0	containing	exonic
MSTRG.42091.3	OS_LNC1362	sense	genic	0	overlapping	exonic
MSTRG.42105.2	OS_LNC1363	sense	genic	0	overlapping	exonic
MSTRG.42144.1	OS_LNC1364	sense	intergenic	4613	same_strand	upstream
MSTRG.42195.1	OS_LNC1365	sense	intergenic	1379	same_strand	downstream
MSTRG.42228.1	OS_LNC1366	antisense	intergenic	199	convergent	downstream
MSTRG.423.3	OS_LNC1367	sense	genic	0	containing	exonic
MSTRG.42326.2	OS_LNC1368	sense	intergenic	27237	same_strand	upstream
MSTRG.42326.3	OS_LNC1369	antisense	intergenic	27986	divergent	upstream
MSTRG.42368.1	OS_LNC1370	antisense	genic	0	overlapping	exonic
MSTRG.42368.2	OS_LNC1371	antisense	genic	0	overlapping	exonic
MSTRG.42476.10	OS_LNC1372	sense	genic	0	overlapping	exonic
MSTRG.42476.13	OS_LNC1373	sense	genic	0	containing	exonic
MSTRG.42544.1	OS_LNC1374	sense	genic	0	containing	exonic
MSTRG.42582.1	OS_LNC1375	sense	intergenic	4127	same_strand	downstream
MSTRG.42590.1	OS_LNC1376	sense	genic	0	nested	intronic
MSTRG.42593.1	OS_LNC1377	antisense	intergenic	5322	divergent	upstream
MSTRG.42597.1	OS_LNC1378	antisense	intergenic	278	convergent	downstream
MSTRG.42602.1	OS_LNC1379	antisense	genic	0	nested	exonic
MSTRG.42630.1	OS_LNC1380	antisense	intergenic	1	divergent	upstream
MSTRG.42664.1	OS_LNC1381	antisense	intergenic	7705	convergent	downstream
MSTRG.42668.1	OS_LNC1382	antisense	genic	0	nested	exonic
MSTRG.42681.1	OS_LNC1383	sense	genic	0	containing	exonic
MSTRG.42711.2	OS_LNC1384	sense	genic	0	nested	exonic
MSTRG.42781.1	OS_LNC1385	antisense	genic	0	overlapping	exonic
MSTRG.42820.1	OS_LNC1386	sense	intergenic	930	same_strand	upstream
MSTRG.42880.2	OS_LNC1387	sense	genic	0	nested	exonic
MSTRG.42911.2	OS_LNC1388	sense	genic	0	overlapping	exonic
MSTRG.42915.1	OS_LNC1389	sense	genic	0	nested	exonic
MSTRG.42936.1	OS_LNC1390	sense	genic	0	nested	exonic
MSTRG.42942.1	OS_LNC1391	sense	genic	0	containing	exonic
MSTRG.42982.1	OS_LNC1392	antisense	intergenic	591	convergent	downstream
MSTRG.42982.2	OS_LNC1393	antisense	intergenic	871	convergent	downstream
MSTRG.42982.3	OS_LNC1394	antisense	intergenic	1168	convergent	downstream
MSTRG.42983.1	OS_LNC1395	sense	intergenic	552	same_strand	downstream
MSTRG.42987.1	OS_LNC1396	sense	intergenic	1852	same_strand	downstream
MSTRG.430.1	OS_LNC1397	antisense	genic	0	containing	intronic
MSTRG.43015.1	OS_LNC1398	sense	genic	0	containing	exonic
MSTRG.43056.1	OS_LNC1399	sense	intergenic	139	same_strand	downstream
MSTRG.43076.17	OS_LNC1400	sense	genic	0	overlapping	exonic
MSTRG.43111.1	OS_LNC1401	sense	genic	0	containing	exonic
MSTRG.43157.2	OS_LNC1402	antisense	intergenic	5683	divergent	upstream
MSTRG.43167.1	OS_LNC1403	antisense	genic	0	nested	exonic
MSTRG.43184.1	OS_LNC1404	sense	genic	0	containing	exonic
MSTRG.43269.1	OS_LNC1405	sense	genic	0	containing	exonic
MSTRG.43298.3	OS_LNC1406	sense	genic	0	containing	exonic
MSTRG.43339.4	OS_LNC1407	sense	intergenic	4668	same_strand	upstream
MSTRG.43399.1	OS_LNC1408	sense	genic	0	containing	exonic
MSTRG.43405.1	OS_LNC1409	antisense	genic	0	nested	exonic
MSTRG.43437.1	OS_LNC1410	sense	intergenic	353	same_strand	downstream
MSTRG.43438.1	OS_LNC1411	sense	genic	0	containing	exonic
MSTRG.43449.1	OS_LNC1412	sense	genic	0	containing	exonic
MSTRG.43468.1	OS_LNC1413	sense	genic	0	containing	exonic
MSTRG.43529.1	OS_LNC1414	antisense	genic	0	containing	intronic
MSTRG.43553.2	OS_LNC1415	antisense	genic	0	nested	exonic
MSTRG.4356.1	OS_LNC1416	sense	genic	0	nested	exonic
MSTRG.43599.1	OS_LNC1417	antisense	intergenic	15	divergent	upstream
MSTRG.43626.1	OS_LNC1418	sense	genic	0	containing	exonic
MSTRG.43632.1	OS_LNC1419	sense	genic	0	containing	exonic
MSTRG.43646.1	OS_LNC1420	sense	intergenic	68	same_strand	upstream
MSTRG.43655.1	OS_LNC1421	sense	genic	0	containing	exonic
MSTRG.43667.1	OS_LNC1422	sense	genic	0	containing	exonic
MSTRG.43687.1	OS_LNC1423	sense	genic	0	containing	exonic
MSTRG.43694.1	OS_LNC1424	antisense	intergenic	456	divergent	upstream
MSTRG.43748.1	OS_LNC1425	sense	genic	0	containing	exonic
MSTRG.43748.2	OS_LNC1426	sense	genic	0	containing	exonic
MSTRG.43768.1	OS_LNC1427	sense	intergenic	1824	same_strand	upstream
MSTRG.43798.19	OS_LNC1428	sense	genic	0	nested	exonic
MSTRG.43831.1	OS_LNC1429	antisense	genic	0	overlapping	exonic
MSTRG.43860.1	OS_LNC1430	antisense	genic	0	overlapping	exonic
MSTRG.43860.2	OS_LNC1431	antisense	genic	0	overlapping	exonic
MSTRG.4389.1	OS_LNC1432	sense	intergenic	5524	same_strand	upstream
MSTRG.43892.1	OS_LNC1433	sense	genic	0	overlapping	exonic
MSTRG.43916.1	OS_LNC1434	sense	intergenic	4050	same_strand	downstream
MSTRG.43970.3	OS_LNC1435	sense	genic	0	overlapping	exonic
MSTRG.43970.4	OS_LNC1436	antisense	intergenic	27	divergent	upstream
MSTRG.4399.2	OS_LNC1437	sense	genic	0	nested	exonic
MSTRG.44008.1	OS_LNC1438	sense	intergenic	393	same_strand	downstream
MSTRG.44073.1	OS_LNC1439	sense	genic	0	containing	exonic
MSTRG.44073.3	OS_LNC1440	sense	genic	0	nested	exonic
MSTRG.44096.1	OS_LNC1441	antisense	genic	0	overlapping	exonic
MSTRG.44160.1	OS_LNC1442	antisense	genic	0	nested	exonic
MSTRG.44160.2	OS_LNC1443	antisense	genic	0	nested	exonic
MSTRG.44160.3	OS_LNC1444	antisense	genic	0	nested	exonic
MSTRG.44189.2	OS_LNC1445	sense	genic	0	containing	exonic
MSTRG.4423.1	OS_LNC1446	sense	genic	0	containing	exonic
MSTRG.44248.1	OS_LNC1447	sense	genic	0	overlapping	exonic
MSTRG.44250.1	OS_LNC1448	sense	genic	0	containing	exonic
MSTRG.44261.1	OS_LNC1449	antisense	intergenic	503	convergent	downstream
MSTRG.44267.1	OS_LNC1450	sense	genic	0	containing	exonic
MSTRG.44273.3	OS_LNC1451	sense	genic	0	overlapping	exonic
MSTRG.44273.4	OS_LNC1452	sense	genic	0	overlapping	exonic
MSTRG.44273.5	OS_LNC1453	sense	genic	0	overlapping	exonic
MSTRG.44273.6	OS_LNC1454	sense	genic	0	overlapping	exonic
MSTRG.44280.3	OS_LNC1455	antisense	intergenic	2378	divergent	upstream
MSTRG.44308.1	OS_LNC1456	antisense	genic	0	nested	exonic
MSTRG.4432.1	OS_LNC1457	sense	genic	0	containing	exonic
MSTRG.4432.11	OS_LNC1458	sense	genic	0	containing	exonic
MSTRG.4432.2	OS_LNC1459	sense	genic	0	containing	exonic
MSTRG.4432.7	OS_LNC1460	sense	genic	0	containing	exonic
MSTRG.4432.8	OS_LNC1461	sense	genic	0	containing	exonic
MSTRG.4432.9	OS_LNC1462	sense	genic	0	containing	exonic
MSTRG.44402.2	OS_LNC1463	sense	genic	0	nested	exonic
MSTRG.44408.1	OS_LNC1464	antisense	intergenic	3538	divergent	upstream
MSTRG.44429.1	OS_LNC1465	sense	genic	0	containing	exonic
MSTRG.44429.2	OS_LNC1466	sense	genic	0	containing	exonic
MSTRG.44433.1	OS_LNC1467	sense	genic	0	containing	exonic
MSTRG.44488.3	OS_LNC1468	sense	genic	0	overlapping	exonic
MSTRG.44488.4	OS_LNC1469	sense	genic	0	overlapping	exonic
MSTRG.44538.1	OS_LNC1470	sense	intergenic	19420	same_strand	downstream
MSTRG.44546.1	OS_LNC1471	sense	genic	0	overlapping	exonic
MSTRG.44564.1	OS_LNC1472	antisense	intergenic	125	convergent	downstream
MSTRG.44572.1	OS_LNC1473	antisense	intergenic	1135	divergent	upstream
MSTRG.44572.2	OS_LNC1474	antisense	intergenic	1140	divergent	upstream
MSTRG.44572.3	OS_LNC1475	antisense	intergenic	1125	divergent	upstream
MSTRG.44601.12	OS_LNC1476	sense	genic	0	nested	exonic
MSTRG.44601.13	OS_LNC1477	sense	genic	0	nested	exonic
MSTRG.44604.1	OS_LNC1478	antisense	genic	0	containing	intronic
MSTRG.44608.1	OS_LNC1479	sense	intergenic	684	same_strand	upstream
MSTRG.44643.1	OS_LNC1480	antisense	intergenic	5	divergent	upstream
MSTRG.44645.1	OS_LNC1481	antisense	genic	0	overlapping	exonic
MSTRG.44672.1	OS_LNC1482	sense	genic	0	containing	exonic
MSTRG.44696.2	OS_LNC1483	sense	genic	0	containing	exonic
MSTRG.44697.2	OS_LNC1484	antisense	genic	0	overlapping	intronic
MSTRG.44704.2	OS_LNC1485	antisense	intergenic	4913	convergent	downstream
MSTRG.44721.1	OS_LNC1486	antisense	intergenic	3021	divergent	upstream
MSTRG.44836.2	OS_LNC1487	sense	genic	0	containing	exonic
MSTRG.44925.3	OS_LNC1488	sense	genic	0	overlapping	exonic
MSTRG.44944.5	OS_LNC1489	sense	genic	0	containing	exonic
MSTRG.44967.2	OS_LNC1490	sense	intergenic	4187	same_strand	downstream
MSTRG.44967.4	OS_LNC1491	sense	intergenic	4201	same_strand	downstream
MSTRG.45004.1	OS_LNC1492	sense	intergenic	16983	same_strand	downstream
MSTRG.45007.1	OS_LNC1493	sense	intergenic	9183	same_strand	downstream
MSTRG.45025.1	OS_LNC1494	antisense	genic	0	containing	intronic
MSTRG.45025.2	OS_LNC1495	antisense	genic	0	containing	intronic
MSTRG.45033.1	OS_LNC1496	sense	genic	0	containing	exonic
MSTRG.45034.5	OS_LNC1497	sense	genic	0	overlapping	exonic
MSTRG.45053.2	OS_LNC1498	sense	genic	0	containing	exonic
MSTRG.45153.1	OS_LNC1499	sense	intergenic	798	same_strand	downstream
MSTRG.45167.2	OS_LNC1500	sense	genic	0	nested	exonic
MSTRG.45175.2	OS_LNC1501	antisense	genic	0	nested	exonic
MSTRG.45236.1	OS_LNC1502	antisense	intergenic	11042	divergent	upstream
MSTRG.45236.4	OS_LNC1503	antisense	intergenic	11105	divergent	upstream
MSTRG.45244.1	OS_LNC1504	antisense	intergenic	4689	convergent	downstream
MSTRG.45244.2	OS_LNC1505	antisense	intergenic	4689	convergent	downstream
MSTRG.45244.4	OS_LNC1506	antisense	intergenic	4707	convergent	downstream
MSTRG.4527.1	OS_LNC1507	sense	genic	0	overlapping	exonic
MSTRG.45284.1	OS_LNC1508	sense	intergenic	6843	same_strand	upstream
MSTRG.45317.5	OS_LNC1509	sense	genic	0	nested	exonic
MSTRG.45318.1	OS_LNC1510	sense	genic	0	containing	exonic
MSTRG.45341.10	OS_LNC1511	sense	genic	0	overlapping	exonic
MSTRG.45341.5	OS_LNC1512	sense	genic	0	overlapping	exonic
MSTRG.45341.9	OS_LNC1513	sense	genic	0	overlapping	exonic
MSTRG.45381.1	OS_LNC1514	antisense	intergenic	3233	convergent	downstream
MSTRG.45389.1	OS_LNC1515	sense	intergenic	8378	same_strand	downstream
MSTRG.45389.2	OS_LNC1516	sense	intergenic	8621	same_strand	downstream
MSTRG.45394.1	OS_LNC1517	sense	genic	0	containing	exonic
MSTRG.45439.1	OS_LNC1518	sense	genic	0	containing	exonic
MSTRG.45465.1	OS_LNC1519	sense	genic	0	overlapping	exonic
MSTRG.45465.2	OS_LNC1520	sense	genic	0	overlapping	exonic
MSTRG.45465.3	OS_LNC1521	sense	genic	0	overlapping	exonic
MSTRG.45478.1	OS_LNC1522	sense	genic	0	overlapping	exonic
MSTRG.45480.1	OS_LNC1523	antisense	intergenic	3350	divergent	upstream
MSTRG.45513.1	OS_LNC1524	antisense	intergenic	5328	divergent	upstream
MSTRG.45513.2	OS_LNC1525	antisense	intergenic	5332	divergent	upstream
MSTRG.45565.1	OS_LNC1526	sense	genic	0	overlapping	exonic
MSTRG.45565.2	OS_LNC1527	sense	genic	0	overlapping	exonic
MSTRG.45600.1	OS_LNC1528	antisense	intergenic	8835	divergent	upstream
MSTRG.45643.1	OS_LNC1529	antisense	intergenic	4935	convergent	downstream
MSTRG.45646.3	OS_LNC1530	sense	genic	0	overlapping	exonic
MSTRG.45646.4	OS_LNC1531	sense	genic	0	overlapping	exonic
MSTRG.45671.2	OS_LNC1532	sense	genic	0	overlapping	exonic
MSTRG.45702.1	OS_LNC1533	sense	intergenic	3841	same_strand	downstream
MSTRG.45749.11	OS_LNC1534	sense	genic	0	overlapping	exonic
MSTRG.45749.13	OS_LNC1535	sense	genic	0	overlapping	exonic
MSTRG.45751.1	OS_LNC1536	antisense	intergenic	1826	convergent	downstream
MSTRG.4576.4	OS_LNC1537	sense	genic	0	containing	exonic
MSTRG.45770.13	OS_LNC1538	sense	genic	0	containing	exonic
MSTRG.45776.1	OS_LNC1539	sense	intergenic	22158	same_strand	upstream
MSTRG.45783.1	OS_LNC1540	sense	genic	0	containing	exonic
MSTRG.45786.1	OS_LNC1541	antisense	intergenic	31416	convergent	downstream
MSTRG.45801.1	OS_LNC1542	sense	intergenic	4579	same_strand	downstream
MSTRG.45803.1	OS_LNC1543	sense	intergenic	12227	same_strand	downstream
MSTRG.45858.2	OS_LNC1544	sense	genic	0	overlapping	exonic
MSTRG.45871.1	OS_LNC1545	sense	intergenic	1622	same_strand	downstream
MSTRG.46007.3	OS_LNC1546	sense	genic	0	containing	exonic
MSTRG.46049.2	OS_LNC1547	antisense	genic	0	overlapping	exonic
MSTRG.46049.3	OS_LNC1548	antisense	genic	0	overlapping	exonic
MSTRG.46051.2	OS_LNC1549	antisense	intergenic	6192	divergent	upstream
MSTRG.46133.1	OS_LNC1550	sense	intergenic	2035	same_strand	upstream
MSTRG.46150.1	OS_LNC1551	antisense	intergenic	2574	convergent	downstream
MSTRG.46166.1	OS_LNC1552	antisense	genic	0	containing	exonic
MSTRG.46166.2	OS_LNC1553	antisense	genic	0	containing	exonic
MSTRG.46166.3	OS_LNC1554	antisense	genic	0	overlapping	exonic
MSTRG.46193.1	OS_LNC1555	sense	genic	0	nested	exonic
MSTRG.46280.1	OS_LNC1556	sense	genic	0	containing	exonic
MSTRG.46286.1	OS_LNC1557	sense	genic	0	containing	exonic
MSTRG.46286.2	OS_LNC1558	sense	genic	0	containing	exonic
MSTRG.46298.1	OS_LNC1559	sense	genic	0	overlapping	exonic
MSTRG.46298.3	OS_LNC1560	sense	genic	0	overlapping	exonic
MSTRG.46335.1	OS_LNC1561	antisense	genic	0	overlapping	exonic
MSTRG.4635.1	OS_LNC1562	sense	genic	0	nested	exonic
MSTRG.46366.1	OS_LNC1563	sense	genic	0	containing	exonic
MSTRG.46411.1	OS_LNC1564	antisense	genic	0	overlapping	exonic
MSTRG.46427.1	OS_LNC1565	sense	intergenic	1427	same_strand	downstream
MSTRG.46439.1	OS_LNC1566	sense	genic	0	overlapping	exonic
MSTRG.46503.1	OS_LNC1567	sense	genic	0	containing	exonic
MSTRG.46503.4	OS_LNC1568	sense	genic	0	overlapping	exonic
MSTRG.46507.4	OS_LNC1569	sense	genic	0	containing	exonic
MSTRG.46507.6	OS_LNC1570	sense	genic	0	containing	exonic
MSTRG.46507.7	OS_LNC1571	sense	genic	0	containing	exonic
MSTRG.46611.1	OS_LNC1572	antisense	genic	0	nested	exonic
MSTRG.4667.1	OS_LNC1573	sense	genic	0	containing	exonic
MSTRG.4667.2	OS_LNC1574	sense	genic	0	containing	exonic
MSTRG.4667.3	OS_LNC1575	sense	genic	0	containing	exonic
MSTRG.4667.4	OS_LNC1576	sense	genic	0	containing	exonic
MSTRG.46673.1	OS_LNC1577	sense	genic	0	containing	exonic
MSTRG.46773.1	OS_LNC1578	antisense	genic	0	overlapping	exonic
MSTRG.46773.2	OS_LNC1579	antisense	genic	0	overlapping	exonic
MSTRG.46930.1	OS_LNC1580	antisense	genic	0	nested	exonic
MSTRG.46943.1	OS_LNC1581	sense	genic	0	containing	intronic
MSTRG.46955.1	OS_LNC1582	sense	genic	0	containing	exonic
MSTRG.46976.1	OS_LNC1583	antisense	intergenic	786	convergent	downstream
MSTRG.46976.2	OS_LNC1584	antisense	intergenic	13	convergent	downstream
MSTRG.46976.3	OS_LNC1585	antisense	intergenic	5183	convergent	downstream
MSTRG.46976.4	OS_LNC1586	antisense	intergenic	13	convergent	downstream
MSTRG.46976.5	OS_LNC1587	antisense	genic	0	overlapping	exonic
MSTRG.47049.1	OS_LNC1588	antisense	genic	0	overlapping	exonic
MSTRG.47049.2	OS_LNC1589	antisense	genic	0	overlapping	exonic
MSTRG.47066.1	OS_LNC1590	sense	intergenic	584	same_strand	downstream
MSTRG.47102.7	OS_LNC1591	sense	genic	0	overlapping	exonic
MSTRG.47102.9	OS_LNC1592	sense	genic	0	overlapping	exonic
MSTRG.47120.2	OS_LNC1593	antisense	intergenic	53	divergent	upstream
MSTRG.47123.3	OS_LNC1594	sense	genic	0	containing	exonic
MSTRG.47132.1	OS_LNC1595	antisense	genic	0	containing	exonic
MSTRG.47233.1	OS_LNC1596	sense	genic	0	nested	intronic
MSTRG.47250.2	OS_LNC1597	sense	genic	0	overlapping	exonic
MSTRG.47251.1	OS_LNC1598	antisense	genic	0	nested	exonic
MSTRG.47252.1	OS_LNC1599	antisense	intergenic	15	convergent	downstream
MSTRG.47268.1	OS_LNC1600	sense	genic	0	containing	exonic
MSTRG.47268.6	OS_LNC1601	sense	genic	0	containing	exonic
MSTRG.47302.1	OS_LNC1602	antisense	genic	0	overlapping	exonic
MSTRG.47302.2	OS_LNC1603	antisense	intergenic	437	divergent	upstream
MSTRG.47339.1	OS_LNC1604	antisense	intergenic	13383	convergent	downstream
MSTRG.47370.1	OS_LNC1605	antisense	intergenic	342	divergent	upstream
MSTRG.47370.2	OS_LNC1606	antisense	intergenic	359	divergent	upstream
MSTRG.47397.1	OS_LNC1607	antisense	genic	0	overlapping	exonic
MSTRG.47399.1	OS_LNC1608	antisense	genic	0	overlapping	exonic
MSTRG.47414.1	OS_LNC1609	antisense	intergenic	1227	divergent	upstream
MSTRG.47451.1	OS_LNC1610	sense	intergenic	3836	same_strand	downstream
MSTRG.47457.1	OS_LNC1611	sense	genic	0	containing	intronic
MSTRG.47511.3	OS_LNC1612	sense	genic	0	nested	exonic
MSTRG.47558.1	OS_LNC1613	sense	genic	0	containing	exonic
MSTRG.47604.1	OS_LNC1614	antisense	intergenic	2902	divergent	upstream
MSTRG.47638.1	OS_LNC1615	antisense	intergenic	6537	divergent	upstream
MSTRG.47647.1	OS_LNC1616	sense	genic	0	overlapping	exonic
MSTRG.47695.2	OS_LNC1617	sense	intergenic	760	same_strand	upstream
MSTRG.47721.1	OS_LNC1618	sense	intergenic	7576	same_strand	downstream
MSTRG.47777.1	OS_LNC1619	sense	genic	0	containing	exonic
MSTRG.47777.2	OS_LNC1620	sense	genic	0	containing	exonic
MSTRG.47779.1	OS_LNC1621	sense	intergenic	4713	same_strand	upstream
MSTRG.47779.2	OS_LNC1622	sense	intergenic	4713	same_strand	upstream
MSTRG.47787.2	OS_LNC1623	sense	genic	0	nested	exonic
MSTRG.47791.2	OS_LNC1624	sense	genic	0	overlapping	exonic
MSTRG.47791.3	OS_LNC1625	sense	genic	0	containing	exonic
MSTRG.47822.1	OS_LNC1626	sense	genic	0	containing	exonic
MSTRG.47822.2	OS_LNC1627	sense	genic	0	containing	exonic
MSTRG.47824.1	OS_LNC1628	sense	genic	0	containing	exonic
MSTRG.47824.5	OS_LNC1629	sense	genic	0	overlapping	exonic
MSTRG.47836.1	OS_LNC1630	sense	intergenic	3188	same_strand	upstream
MSTRG.47836.2	OS_LNC1631	sense	intergenic	3188	same_strand	upstream
MSTRG.47836.3	OS_LNC1632	sense	intergenic	3188	same_strand	upstream
MSTRG.47836.4	OS_LNC1633	sense	intergenic	3188	same_strand	upstream
MSTRG.47836.5	OS_LNC1634	sense	intergenic	3188	same_strand	upstream
MSTRG.47836.6	OS_LNC1635	sense	intergenic	3188	same_strand	upstream
MSTRG.47836.7	OS_LNC1636	sense	intergenic	3188	same_strand	upstream
MSTRG.47937.1	OS_LNC1637	antisense	intergenic	2722	convergent	downstream
MSTRG.47937.2	OS_LNC1638	antisense	intergenic	2722	convergent	downstream
MSTRG.47946.1	OS_LNC1639	sense	intergenic	4279	same_strand	downstream
MSTRG.47946.3	OS_LNC1640	sense	intergenic	4331	same_strand	downstream
MSTRG.47969.1	OS_LNC1641	sense	intergenic	8267	same_strand	downstream
MSTRG.47995.4	OS_LNC1642	sense	genic	0	containing	exonic
MSTRG.48048.2	OS_LNC1643	sense	genic	0	nested	exonic
MSTRG.48069.1	OS_LNC1644	sense	intergenic	28420	same_strand	upstream
MSTRG.48133.1	OS_LNC1645	antisense	genic	0	overlapping	exonic
MSTRG.48133.2	OS_LNC1646	antisense	genic	0	overlapping	exonic
MSTRG.48133.3	OS_LNC1647	antisense	genic	0	overlapping	exonic
MSTRG.48133.4	OS_LNC1648	antisense	intergenic	2	convergent	downstream
MSTRG.48192.1	OS_LNC1649	sense	intergenic	335	same_strand	downstream
MSTRG.4823.1	OS_LNC1650	antisense	genic	0	nested	exonic
MSTRG.48257.2	OS_LNC1651	antisense	intergenic	396	convergent	downstream
MSTRG.48323.1	OS_LNC1652	sense	intergenic	54851	same_strand	downstream
MSTRG.48324.1	OS_LNC1653	sense	intergenic	56236	same_strand	downstream
MSTRG.48340.2	OS_LNC1654	sense	genic	0	containing	exonic
MSTRG.48422.1	OS_LNC1655	antisense	intergenic	160	convergent	downstream
MSTRG.48434.1	OS_LNC1656	antisense	intergenic	43295	divergent	upstream
MSTRG.48544.1	OS_LNC1657	antisense	genic	0	nested	intronic
MSTRG.48595.1	OS_LNC1658	sense	intergenic	23243	same_strand	upstream
MSTRG.48595.2	OS_LNC1659	sense	intergenic	23243	same_strand	upstream
MSTRG.48595.4	OS_LNC1660	sense	intergenic	23295	same_strand	upstream
MSTRG.48610.1	OS_LNC1661	sense	intergenic	1027	same_strand	upstream
MSTRG.48634.1	OS_LNC1662	antisense	intergenic	3334	divergent	upstream
MSTRG.48634.3	OS_LNC1663	antisense	intergenic	3427	divergent	upstream
MSTRG.48634.4	OS_LNC1664	antisense	intergenic	3468	divergent	upstream
MSTRG.48656.1	OS_LNC1665	antisense	genic	0	overlapping	exonic
MSTRG.48656.5	OS_LNC1666	antisense	genic	0	nested	exonic
MSTRG.48656.8	OS_LNC1667	antisense	genic	0	nested	exonic
MSTRG.4869.1	OS_LNC1668	antisense	genic	0	overlapping	exonic
MSTRG.487.1	OS_LNC1669	sense	intergenic	680	same_strand	downstream
MSTRG.48733.1	OS_LNC1670	sense	genic	0	containing	exonic
MSTRG.48744.1	OS_LNC1671	antisense	genic	0	overlapping	exonic
MSTRG.4876.2	OS_LNC1672	antisense	intergenic	1463	divergent	upstream
MSTRG.48823.1	OS_LNC1673	antisense	intergenic	3773	divergent	upstream
MSTRG.48892.1	OS_LNC1674	antisense	intergenic	1251	convergent	downstream
MSTRG.48914.1	OS_LNC1675	sense	intergenic	11755	same_strand	downstream
MSTRG.48940.1	OS_LNC1676	sense	genic	0	containing	exonic
MSTRG.48963.1	OS_LNC1677	sense	intergenic	17218	same_strand	downstream
MSTRG.4907.1	OS_LNC1678	antisense	intergenic	782	convergent	downstream
MSTRG.49083.1	OS_LNC1679	sense	intergenic	805	same_strand	upstream
MSTRG.49176.6	OS_LNC1680	sense	genic	0	nested	exonic
MSTRG.492.1	OS_LNC1681	antisense	genic	0	containing	exonic
MSTRG.4921.1	OS_LNC1682	antisense	genic	0	overlapping	exonic
MSTRG.49295.2	OS_LNC1683	antisense	genic	0	overlapping	exonic
MSTRG.49298.1	OS_LNC1684	antisense	intergenic	2116	divergent	upstream
MSTRG.49298.3	OS_LNC1685	antisense	intergenic	2140	divergent	upstream
MSTRG.49298.4	OS_LNC1686	antisense	intergenic	2140	divergent	upstream
MSTRG.49298.6	OS_LNC1687	antisense	intergenic	2116	divergent	upstream
MSTRG.49356.32	OS_LNC1688	sense	genic	0	nested	exonic
MSTRG.49356.35	OS_LNC1689	sense	genic	0	nested	exonic
MSTRG.49471.3	OS_LNC1690	sense	genic	0	containing	exonic
MSTRG.49471.4	OS_LNC1691	sense	genic	0	containing	exonic
MSTRG.49472.2	OS_LNC1692	sense	intergenic	574	same_strand	downstream
MSTRG.49520.2	OS_LNC1693	sense	genic	0	nested	exonic
MSTRG.49525.1	OS_LNC1694	sense	genic	0	containing	intronic
MSTRG.49578.1	OS_LNC1695	sense	intergenic	3962	same_strand	downstream
MSTRG.49620.1	OS_LNC1696	antisense	genic	0	overlapping	exonic
MSTRG.49651.1	OS_LNC1697	antisense	genic	0	overlapping	exonic
MSTRG.49740.2	OS_LNC1698	sense	genic	0	containing	exonic
MSTRG.49822.2	OS_LNC1699	antisense	genic	0	overlapping	exonic
MSTRG.49880.3	OS_LNC1700	sense	genic	0	nested	exonic
MSTRG.49924.1	OS_LNC1701	antisense	genic	0	overlapping	exonic
MSTRG.50017.5	OS_LNC1702	antisense	genic	0	overlapping	exonic
MSTRG.50035.13	OS_LNC1703	sense	genic	0	nested	exonic
MSTRG.50083.1	OS_LNC1704	sense	genic	0	containing	exonic
MSTRG.50083.3	OS_LNC1705	sense	genic	0	overlapping	exonic
MSTRG.5010.1	OS_LNC1706	sense	genic	0	nested	intronic
MSTRG.5011.1	OS_LNC1707	antisense	genic	0	containing	exonic
MSTRG.50167.1	OS_LNC1708	antisense	genic	0	overlapping	exonic
MSTRG.50167.2	OS_LNC1709	antisense	genic	0	overlapping	exonic
MSTRG.50206.1	OS_LNC1710	sense	intergenic	570	same_strand	downstream
MSTRG.50236.1	OS_LNC1711	antisense	intergenic	1553	convergent	downstream
MSTRG.50259.1	OS_LNC1712	sense	genic	0	containing	exonic
MSTRG.5028.1	OS_LNC1713	sense	genic	0	nested	exonic
MSTRG.50305.1	OS_LNC1714	sense	genic	0	containing	exonic
MSTRG.50309.1	OS_LNC1715	sense	genic	0	containing	exonic
MSTRG.50309.2	OS_LNC1716	sense	genic	0	containing	exonic
MSTRG.50347.1	OS_LNC1717	antisense	intergenic	234	convergent	downstream
MSTRG.50410.2	OS_LNC1718	sense	genic	0	containing	exonic
MSTRG.50416.1	OS_LNC1719	sense	genic	0	containing	exonic
MSTRG.50549.4	OS_LNC1720	antisense	genic	0	overlapping	exonic
MSTRG.50550.1	OS_LNC1721	sense	genic	0	containing	exonic
MSTRG.50550.2	OS_LNC1722	sense	genic	0	containing	exonic
MSTRG.5093.9	OS_LNC1723	sense	genic	0	nested	exonic
MSTRG.5134.1	OS_LNC1724	antisense	genic	0	overlapping	exonic
MSTRG.5231.1	OS_LNC1725	sense	genic	0	containing	exonic
MSTRG.5231.2	OS_LNC1726	sense	genic	0	containing	exonic
MSTRG.5250.1	OS_LNC1727	sense	intergenic	997	same_strand	downstream
MSTRG.5253.1	OS_LNC1728	sense	intergenic	3975	same_strand	downstream
MSTRG.5283.1	OS_LNC1729	sense	genic	0	containing	exonic
MSTRG.5313.2	OS_LNC1730	sense	intergenic	1132	same_strand	upstream
MSTRG.5346.1	OS_LNC1731	sense	genic	0	overlapping	exonic
MSTRG.5386.1	OS_LNC1732	sense	genic	0	containing	exonic
MSTRG.5450.1	OS_LNC1733	antisense	intergenic	9431	convergent	downstream
MSTRG.5461.2	OS_LNC1734	antisense	genic	0	nested	exonic
MSTRG.550.1	OS_LNC1735	sense	genic	0	containing	intronic
MSTRG.555.1	OS_LNC1736	antisense	intergenic	1776	convergent	downstream
MSTRG.5563.2	OS_LNC1737	sense	genic	0	nested	exonic
MSTRG.5563.3	OS_LNC1738	sense	genic	0	nested	exonic
MSTRG.5645.4	OS_LNC1739	antisense	genic	0	overlapping	exonic
MSTRG.5646.1	OS_LNC1740	sense	genic	0	overlapping	exonic
MSTRG.5697.2	OS_LNC1741	sense	genic	0	containing	exonic
MSTRG.5700.4	OS_LNC1742	sense	genic	0	overlapping	exonic
MSTRG.5701.1	OS_LNC1743	sense	intergenic	523	same_strand	upstream
MSTRG.573.3	OS_LNC1744	sense	genic	0	overlapping	exonic
MSTRG.573.4	OS_LNC1745	sense	genic	0	overlapping	exonic
MSTRG.5747.1	OS_LNC1746	sense	genic	0	containing	exonic
MSTRG.5757.12	OS_LNC1747	sense	genic	0	nested	exonic
MSTRG.5848.1	OS_LNC1748	sense	genic	0	containing	exonic
MSTRG.5895.1	OS_LNC1749	sense	intergenic	3533	same_strand	upstream
MSTRG.5902.1	OS_LNC1750	sense	intergenic	1312	same_strand	upstream
MSTRG.5925.1	OS_LNC1751	antisense	genic	0	overlapping	exonic
MSTRG.5932.1	OS_LNC1752	antisense	intergenic	349	divergent	upstream
MSTRG.6036.1	OS_LNC1753	sense	genic	0	containing	exonic
MSTRG.6037.5	OS_LNC1754	sense	genic	0	overlapping	exonic
MSTRG.6078.4	OS_LNC1755	sense	genic	0	overlapping	exonic
MSTRG.6127.1	OS_LNC1756	sense	genic	0	nested	exonic
MSTRG.6163.1	OS_LNC1757	sense	genic	0	containing	exonic
MSTRG.6165.1	OS_LNC1758	antisense	genic	0	overlapping	exonic
MSTRG.6165.2	OS_LNC1759	antisense	intergenic	1329	convergent	downstream
MSTRG.6216.1	OS_LNC1760	antisense	genic	0	overlapping	exonic
MSTRG.6262.1	OS_LNC1761	antisense	genic	0	overlapping	exonic
MSTRG.6264.1	OS_LNC1762	antisense	genic	0	containing	exonic
MSTRG.6264.2	OS_LNC1763	antisense	genic	0	containing	exonic
MSTRG.6264.3	OS_LNC1764	antisense	intergenic	703	divergent	upstream
MSTRG.6344.1	OS_LNC1765	sense	genic	0	overlapping	exonic
MSTRG.6350.3	OS_LNC1766	sense	genic	0	nested	exonic
MSTRG.642.1	OS_LNC1767	sense	genic	0	containing	exonic
MSTRG.6467.1	OS_LNC1768	sense	genic	0	overlapping	exonic
MSTRG.6529.1	OS_LNC1769	sense	intergenic	528	same_strand	downstream
MSTRG.6541.1	OS_LNC1770	antisense	genic	0	overlapping	exonic
MSTRG.6542.1	OS_LNC1771	antisense	intergenic	1146	divergent	upstream
MSTRG.6562.1	OS_LNC1772	sense	genic	0	containing	exonic
MSTRG.6562.3	OS_LNC1773	sense	genic	0	containing	exonic
MSTRG.6562.4	OS_LNC1774	sense	genic	0	containing	exonic
MSTRG.6562.5	OS_LNC1775	sense	genic	0	overlapping	exonic
MSTRG.6562.7	OS_LNC1776	sense	genic	0	containing	exonic
MSTRG.6562.8	OS_LNC1777	sense	genic	0	containing	exonic
MSTRG.6562.9	OS_LNC1778	sense	genic	0	containing	exonic
MSTRG.6565.1	OS_LNC1779	sense	intergenic	17	same_strand	downstream
MSTRG.6567.5	OS_LNC1780	sense	genic	0	overlapping	exonic
MSTRG.6629.1	OS_LNC1781	antisense	genic	0	overlapping	exonic
MSTRG.6642.1	OS_LNC1782	sense	intergenic	4275	same_strand	upstream
MSTRG.6766.1	OS_LNC1783	sense	intergenic	121	same_strand	upstream
MSTRG.6811.1	OS_LNC1784	antisense	genic	0	containing	intronic
MSTRG.6811.2	OS_LNC1785	antisense	genic	0	containing	intronic
MSTRG.6835.2	OS_LNC1786	sense	genic	0	nested	exonic
MSTRG.6865.1	OS_LNC1787	sense	intergenic	3190	same_strand	downstream
MSTRG.6867.2	OS_LNC1788	sense	genic	0	nested	exonic
MSTRG.6984.2	OS_LNC1789	sense	genic	0	nested	exonic
MSTRG.71.1	OS_LNC1790	sense	intergenic	6998	same_strand	upstream
MSTRG.7109.1	OS_LNC1791	sense	genic	0	overlapping	exonic
MSTRG.7114.1	OS_LNC1792	antisense	intergenic	4239	divergent	upstream
MSTRG.7115.1	OS_LNC1793	sense	genic	0	containing	exonic
MSTRG.7118.1	OS_LNC1794	sense	genic	0	containing	exonic
MSTRG.7122.1	OS_LNC1795	sense	intergenic	4014	same_strand	downstream
MSTRG.7122.2	OS_LNC1796	sense	intergenic	4025	same_strand	downstream
MSTRG.7134.1	OS_LNC1797	antisense	intergenic	24256	convergent	downstream
MSTRG.7134.3	OS_LNC1798	antisense	intergenic	25098	convergent	downstream
MSTRG.7136.1	OS_LNC1799	antisense	intergenic	43128	divergent	upstream
MSTRG.7160.1	OS_LNC1800	antisense	intergenic	33672	divergent	upstream
MSTRG.7160.3	OS_LNC1801	antisense	intergenic	33672	divergent	upstream
MSTRG.7160.5	OS_LNC1802	antisense	intergenic	33720	divergent	upstream
MSTRG.7186.1	OS_LNC1803	antisense	intergenic	2339	divergent	upstream
MSTRG.7189.1	OS_LNC1804	sense	intergenic	5696	same_strand	downstream
MSTRG.7230.1	OS_LNC1805	antisense	intergenic	3988	convergent	downstream
MSTRG.7231.1	OS_LNC1806	antisense	intergenic	8300	convergent	downstream
MSTRG.7253.3	OS_LNC1807	sense	genic	0	overlapping	exonic
MSTRG.7253.6	OS_LNC1808	sense	genic	0	overlapping	exonic
MSTRG.7253.7	OS_LNC1809	sense	genic	0	overlapping	exonic
MSTRG.7253.8	OS_LNC1810	sense	genic	0	overlapping	exonic
MSTRG.7268.1	OS_LNC1811	antisense	genic	0	overlapping	exonic
MSTRG.7311.1	OS_LNC1812	sense	genic	0	containing	exonic
MSTRG.7353.1	OS_LNC1813	antisense	intergenic	17451	convergent	downstream
MSTRG.7361.1	OS_LNC1814	sense	intergenic	14291	same_strand	upstream
MSTRG.7370.1	OS_LNC1815	sense	genic	0	containing	intronic
MSTRG.7370.2	OS_LNC1816	sense	genic	0	containing	intronic
MSTRG.7370.4	OS_LNC1817	sense	genic	0	containing	intronic
MSTRG.7373.1	OS_LNC1818	antisense	genic	0	overlapping	exonic
MSTRG.7408.4	OS_LNC1819	sense	genic	0	containing	exonic
MSTRG.7417.2	OS_LNC1820	sense	genic	0	nested	exonic
MSTRG.7444.2	OS_LNC1821	sense	genic	0	overlapping	exonic
MSTRG.7444.3	OS_LNC1822	sense	genic	0	overlapping	exonic
MSTRG.7444.4	OS_LNC1823	sense	genic	0	overlapping	exonic
MSTRG.7446.1	OS_LNC1824	sense	genic	0	containing	exonic
MSTRG.7450.1	OS_LNC1825	sense	genic	0	containing	exonic
MSTRG.7450.2	OS_LNC1826	sense	genic	0	containing	exonic
MSTRG.7507.2	OS_LNC1827	antisense	genic	0	overlapping	exonic
MSTRG.7579.1	OS_LNC1828	sense	genic	0	containing	exonic
MSTRG.7631.1	OS_LNC1829	sense	genic	0	containing	exonic
MSTRG.765.10	OS_LNC1830	sense	intergenic	1301	same_strand	downstream
MSTRG.7652.2	OS_LNC1831	antisense	intergenic	43456	divergent	upstream
MSTRG.7657.2	OS_LNC1832	antisense	intergenic	17669	convergent	downstream
MSTRG.7696.2	OS_LNC1833	sense	intergenic	1661	same_strand	downstream
MSTRG.7713.1	OS_LNC1834	antisense	intergenic	2032	convergent	downstream
MSTRG.7728.1	OS_LNC1835	antisense	genic	0	containing	exonic
MSTRG.7746.1	OS_LNC1836	sense	genic	0	containing	exonic
MSTRG.7753.1	OS_LNC1837	antisense	intergenic	505	convergent	downstream
MSTRG.7783.1	OS_LNC1838	antisense	intergenic	19020	divergent	upstream
MSTRG.7783.2	OS_LNC1839	antisense	intergenic	19037	divergent	upstream
MSTRG.7783.3	OS_LNC1840	antisense	intergenic	19037	divergent	upstream
MSTRG.7787.1	OS_LNC1841	antisense	genic	0	containing	intronic
MSTRG.7855.2	OS_LNC1842	sense	genic	0	containing	exonic
MSTRG.7855.6	OS_LNC1843	sense	genic	0	containing	exonic
MSTRG.7855.8	OS_LNC1844	sense	genic	0	containing	exonic
MSTRG.7876.1	OS_LNC1845	antisense	intergenic	16506	divergent	upstream
MSTRG.7893.1	OS_LNC1846	antisense	intergenic	3170	divergent	upstream
MSTRG.7980.1	OS_LNC1847	sense	intergenic	9232	same_strand	upstream
MSTRG.7982.1	OS_LNC1848	sense	intergenic	2585	same_strand	downstream
MSTRG.8027.2	OS_LNC1849	sense	genic	0	containing	exonic
MSTRG.8049.1	OS_LNC1850	sense	intergenic	227	same_strand	downstream
MSTRG.8078.1	OS_LNC1851	sense	genic	0	containing	exonic
MSTRG.8078.4	OS_LNC1852	sense	genic	0	containing	exonic
MSTRG.8120.1	OS_LNC1853	sense	genic	0	containing	exonic
MSTRG.8163.1	OS_LNC1854	antisense	intergenic	7442	convergent	downstream
MSTRG.825.1	OS_LNC1855	antisense	genic	0	nested	exonic
MSTRG.8291.1	OS_LNC1856	sense	genic	0	containing	exonic
MSTRG.8320.1	OS_LNC1857	antisense	genic	0	overlapping	exonic
MSTRG.8331.1	OS_LNC1858	antisense	intergenic	7856	convergent	downstream
MSTRG.8332.1	OS_LNC1859	sense	intergenic	7856	same_strand	downstream
MSTRG.8333.1	OS_LNC1860	antisense	intergenic	6673	convergent	downstream
MSTRG.8407.1	OS_LNC1861	antisense	intergenic	5686	divergent	upstream
MSTRG.8409.1	OS_LNC1862	antisense	intergenic	20049	divergent	upstream
MSTRG.8434.1	OS_LNC1863	sense	intergenic	1234	same_strand	upstream
MSTRG.8443.1	OS_LNC1864	sense	intergenic	6348	same_strand	upstream
MSTRG.8445.1	OS_LNC1865	sense	intergenic	1035	same_strand	downstream
MSTRG.8465.1	OS_LNC1866	sense	genic	0	nested	exonic
MSTRG.8465.3	OS_LNC1867	sense	genic	0	nested	exonic
MSTRG.8493.1	OS_LNC1868	antisense	intergenic	1334	divergent	upstream
MSTRG.8553.1	OS_LNC1869	sense	genic	0	containing	exonic
MSTRG.856.1	OS_LNC1870	antisense	intergenic	1640	divergent	upstream
MSTRG.8651.1	OS_LNC1871	sense	genic	0	containing	exonic
MSTRG.8651.2	OS_LNC1872	sense	genic	0	containing	exonic
MSTRG.8655.1	OS_LNC1873	antisense	genic	0	overlapping	exonic
MSTRG.8701.5	OS_LNC1874	sense	genic	0	containing	exonic
MSTRG.8711.1	OS_LNC1875	antisense	genic	0	overlapping	exonic
MSTRG.8720.1	OS_LNC1876	antisense	intergenic	62	convergent	downstream
MSTRG.8729.1	OS_LNC1877	sense	genic	0	containing	exonic
MSTRG.8736.2	OS_LNC1878	sense	genic	0	overlapping	exonic
MSTRG.8788.8	OS_LNC1879	sense	intergenic	876	same_strand	downstream
MSTRG.88.1	OS_LNC1880	sense	genic	0	containing	exonic
MSTRG.8809.1	OS_LNC1881	sense	intergenic	3224	same_strand	upstream
MSTRG.8819.1	OS_LNC1882	sense	genic	0	overlapping	exonic
MSTRG.8889.1	OS_LNC1883	sense	genic	0	nested	exonic
MSTRG.8963.1	OS_LNC1884	antisense	intergenic	1333	divergent	upstream
MSTRG.8964.1	OS_LNC1885	antisense	intergenic	2705	convergent	downstream
MSTRG.8968.1	OS_LNC1886	antisense	intergenic	11	convergent	downstream
MSTRG.9016.3	OS_LNC1887	sense	genic	0	overlapping	exonic
MSTRG.9036.2	OS_LNC1888	sense	genic	0	containing	exonic
MSTRG.9097.1	OS_LNC1889	sense	genic	0	containing	exonic
MSTRG.91.2	OS_LNC1890	sense	genic	0	nested	exonic
MSTRG.913.12	OS_LNC1891	antisense	intergenic	412	divergent	upstream
MSTRG.913.13	OS_LNC1892	antisense	intergenic	416	divergent	upstream
MSTRG.9176.1	OS_LNC1893	antisense	genic	0	overlapping	exonic
MSTRG.9181.1	OS_LNC1894	antisense	intergenic	2606	divergent	upstream
MSTRG.9189.1	OS_LNC1895	antisense	genic	0	overlapping	exonic
MSTRG.9202.1	OS_LNC1896	antisense	intergenic	122	convergent	downstream
MSTRG.9310.1	OS_LNC1897	sense	intergenic	226	same_strand	upstream
MSTRG.9326.2	OS_LNC1898	sense	genic	0	overlapping	exonic
MSTRG.9339.5	OS_LNC1899	antisense	genic	0	containing	exonic
MSTRG.9339.7	OS_LNC1900	antisense	genic	0	containing	exonic
MSTRG.9344.1	OS_LNC1901	sense	intergenic	2629	same_strand	downstream
MSTRG.9344.4	OS_LNC1902	sense	intergenic	2664	same_strand	downstream
MSTRG.9447.1	OS_LNC1903	sense	intergenic	481	same_strand	upstream
MSTRG.9471.1	OS_LNC1904	antisense	genic	0	overlapping	exonic
MSTRG.9471.2	OS_LNC1905	antisense	genic	0	nested	exonic
MSTRG.9473.1	OS_LNC1906	sense	genic	0	containing	exonic
MSTRG.9476.1	OS_LNC1907	sense	genic	0	containing	exonic
MSTRG.9485.1	OS_LNC1908	sense	intergenic	1089	same_strand	downstream
MSTRG.9488.1	OS_LNC1909	antisense	genic	0	nested	exonic
MSTRG.9489.1	OS_LNC1910	antisense	genic	0	overlapping	exonic
MSTRG.9489.2	OS_LNC1911	antisense	genic	0	overlapping	exonic
MSTRG.9491.1	OS_LNC1912	sense	intergenic	271	same_strand	downstream
MSTRG.9496.1	OS_LNC1913	sense	intergenic	7413	same_strand	downstream
MSTRG.9497.2	OS_LNC1914	antisense	intergenic	2898	convergent	downstream
MSTRG.9551.10	OS_LNC1915	sense	genic	0	nested	exonic
MSTRG.956.1	OS_LNC1916	sense	genic	0	containing	exonic
MSTRG.9573.1	OS_LNC1917	sense	intergenic	1590	same_strand	upstream
MSTRG.9644.1	OS_LNC1918	sense	genic	0	containing	exonic
MSTRG.9704.6	OS_LNC1919	sense	genic	0	nested	exonic
MSTRG.9706.1	OS_LNC1920	sense	intergenic	667	same_strand	downstream
MSTRG.9714.3	OS_LNC1921	sense	genic	0	containing	exonic
MSTRG.9762.1	OS_LNC1922	sense	genic	0	containing	exonic
MSTRG.984.1	OS_LNC1923	sense	intergenic	257	same_strand	upstream
MSTRG.9896.3	OS_LNC1924	sense	genic	0	overlapping	exonic
MSTRG.9898.1	OS_LNC1925	sense	genic	0	overlapping	exonic
