# Supplementary material for: Transcriptional Landscape of Pathogen-responsive Lncrnas Reveals OS_LNC1812-Induced Disease Resistance by Abscisic Acid Pathway in Rice
Source: Research Square preprint supplement (doi:10.21203/rs.3.rs-244393/v1), 2021-03-01
Supplement: Supplementary file 5 [file 6fc2a5070abfe3c7d9167a08.xlsx]

## Sheet: Sheet1
Transcript	TF
Os01t0141000-01	RAV
Os05t0549800-01	RAV
Os01t0693400-01	RAV
MSTRG.10002.2	bZIP
MSTRG.10063.2	bHLH
MSTRG.10076.2	bZIP
MSTRG.10096.1	Trihelix
MSTRG.10267.1	NAC
MSTRG.10481.2	bZIP
MSTRG.10663.1	FAR1
MSTRG.10802.16	Nin-like
MSTRG.10802.2	Nin-like
MSTRG.10802.3	Nin-like
MSTRG.10802.8	Nin-like
MSTRG.11615.2	SBP
MSTRG.11878.2	NF-YC
MSTRG.12223.3	bHLH
MSTRG.12795.1	WRKY
MSTRG.12795.2	WRKY
MSTRG.12804.1	WRKY
MSTRG.13112.1	WRKY
MSTRG.13114.1	WRKY
MSTRG.13116.1	WRKY
MSTRG.13116.2	WRKY
MSTRG.13116.3	WRKY
MSTRG.13116.4	WRKY
MSTRG.13280.1	bZIP
MSTRG.13493.2	bZIP
MSTRG.13502.2	Trihelix
MSTRG.1373.1	WRKY
MSTRG.13740.2	bZIP
MSTRG.13925.1	FAR1
MSTRG.13983.3	bZIP
MSTRG.13983.4	bZIP
MSTRG.14175.1	FAR1
MSTRG.1493.1	NAC
MSTRG.15017.1	WRKY
MSTRG.1510.1	Dof
MSTRG.15406.1	bZIP
MSTRG.15520.2	GRAS
MSTRG.15755.1	bZIP
MSTRG.15755.10	bZIP
MSTRG.15755.14	bZIP
MSTRG.15755.2	bZIP
MSTRG.15755.3	bZIP
MSTRG.15755.8	bZIP
MSTRG.15755.9	bZIP
MSTRG.15820.2	bHLH
MSTRG.15825.1	NAC
MSTRG.15854.1	NF-YA
MSTRG.15854.2	NF-YA
MSTRG.15854.3	NF-YA
MSTRG.15854.5	NF-YA
MSTRG.15854.7	NF-YA
MSTRG.15925.2	NF-YA
MSTRG.16276.2	bHLH
MSTRG.16385.2	bZIP
MSTRG.16397.2	BES1
MSTRG.16461.1	Nin-like
MSTRG.16497.10	SBP
MSTRG.16497.11	SBP
MSTRG.16497.3	SBP
MSTRG.16497.4	SBP
MSTRG.16576.1	GATA
MSTRG.1669.1	bZIP
MSTRG.16801.1	NF-YC
MSTRG.16832.2	SBP
MSTRG.16835.1	Trihelix
MSTRG.16841.1	bZIP
MSTRG.16914.2	WRKY
MSTRG.1708.1	bHLH
MSTRG.1708.3	bHLH
MSTRG.1708.4	bHLH
MSTRG.17160.1	bZIP
MSTRG.17327.1	GATA
MSTRG.1738.1	WRKY
MSTRG.1738.2	WRKY
MSTRG.17462.1	BES1
MSTRG.1763.1	SBP
MSTRG.1763.2	SBP
MSTRG.1763.6	SBP
MSTRG.17728.1	bZIP
MSTRG.17728.2	bZIP
MSTRG.17728.3	bZIP
MSTRG.17784.1	CPP
MSTRG.18205.1	bHLH
MSTRG.18733.1	Trihelix
MSTRG.18829.1	HSF
MSTRG.18929.1	Trihelix
MSTRG.18929.2	Trihelix
MSTRG.18957.1	FAR1
MSTRG.18957.3	FAR1
MSTRG.18960.1	Trihelix
MSTRG.19030.2	FAR1
MSTRG.19270.3	NAC
MSTRG.19270.4	NAC
MSTRG.19270.5	NAC
MSTRG.19487.1	bHLH
MSTRG.19487.2	bHLH
MSTRG.19518.1	FAR1
MSTRG.19520.1	FAR1
MSTRG.19842.1	GATA
MSTRG.20364.1	Dof
MSTRG.20534.1	bHLH
MSTRG.2088.1	NAC
MSTRG.21116.1	bHLH
MSTRG.2117.1	GATA
MSTRG.2117.2	GATA
MSTRG.21501.1	bZIP
MSTRG.21819.1	Nin-like
MSTRG.21839.2	NAC
MSTRG.21839.3	NAC
MSTRG.21943.2	GATA
MSTRG.22006.1	E2F/DP
MSTRG.22094.2	HSF
MSTRG.22094.3	HSF
MSTRG.22119.1	FAR1
MSTRG.22208.1	NF-YA
MSTRG.22208.2	NF-YA
MSTRG.22208.3	NF-YA
MSTRG.22354.1	CAMTA
MSTRG.22667.1	NAC
MSTRG.22681.1	NAC
MSTRG.22767.1	bHLH
MSTRG.22767.2	bHLH
MSTRG.22839.2	bZIP
MSTRG.22839.4	bZIP
MSTRG.22839.5	bZIP
MSTRG.22943.1	NF-YC
MSTRG.22978.1	FAR1
MSTRG.23559.1	bZIP
MSTRG.23559.3	bZIP
MSTRG.23594.1	bZIP
MSTRG.23611.1	EIL
MSTRG.23611.2	EIL
MSTRG.23611.3	EIL
MSTRG.23611.4	EIL
MSTRG.23611.5	EIL
MSTRG.23611.6	EIL
MSTRG.23644.1	NAC
MSTRG.23714.1	FAR1
MSTRG.23721.2	WRKY
MSTRG.24007.1	HSF
MSTRG.24180.1	CAMTA
MSTRG.24180.3	CAMTA
MSTRG.24180.4	CAMTA
MSTRG.24180.5	CAMTA
MSTRG.24213.1	bHLH
MSTRG.24389.1	NF-YA
MSTRG.24389.3	NF-YA
MSTRG.24389.4	NF-YA
MSTRG.24607.1	WRKY
MSTRG.24607.2	WRKY
MSTRG.25253.1	bHLH
MSTRG.25253.2	bHLH
MSTRG.25253.3	bHLH
MSTRG.25415.1	FAR1
MSTRG.25430.1	WRKY
MSTRG.25676.1	GATA
MSTRG.25731.5	GRAS
MSTRG.25782.1	NF-YA
MSTRG.25782.2	NF-YA
MSTRG.25782.3	NF-YA
MSTRG.25782.5	NF-YA
MSTRG.25973.1	FAR1
MSTRG.2599.1	LBD
MSTRG.26045.1	bHLH
MSTRG.26086.1	bHLH
MSTRG.26149.1	GATA
MSTRG.26149.2	GATA
MSTRG.26206.1	WRKY
MSTRG.26383.1	WRKY
MSTRG.26383.2	WRKY
MSTRG.2646.1	bHLH
MSTRG.26561.1	NAC
MSTRG.26564.1	FAR1
MSTRG.26564.2	FAR1
MSTRG.2659.1	FAR1
MSTRG.2659.2	FAR1
MSTRG.2659.3	FAR1
MSTRG.26602.1	bHLH
MSTRG.26602.2	bHLH
MSTRG.26602.4	bHLH
MSTRG.26744.1	HSF
MSTRG.26756.1	bZIP
MSTRG.26762.1	bHLH
MSTRG.26762.4	bHLH
MSTRG.26903.1	bHLH
MSTRG.26981.1	Dof
MSTRG.27068.2	GATA
MSTRG.27173.2	FAR1
MSTRG.27433.1	E2F/DP
MSTRG.27797.1	CPP
MSTRG.27797.2	CPP
MSTRG.28459.2	WRKY
MSTRG.28530.1	bHLH
MSTRG.29056.1	CAMTA
MSTRG.29056.4	CAMTA
MSTRG.29141.1	Trihelix
MSTRG.29232.1	S1Fa-like
MSTRG.29232.2	S1Fa-like
MSTRG.29300.4	E2F/DP
MSTRG.29346.1	FAR1
MSTRG.29868.2	FAR1
MSTRG.29878.1	NAC
MSTRG.29980.1	bHLH
MSTRG.30018.1	GRAS
MSTRG.30018.2	GRAS
MSTRG.30032.2	Nin-like
MSTRG.30612.1	Dof
MSTRG.30825.1	GRAS
MSTRG.30905.2	Trihelix
MSTRG.30927.2	WRKY
MSTRG.31287.1	bZIP
MSTRG.32102.1	Trihelix
MSTRG.32120.1	WRKY
MSTRG.32194.2	WRKY
MSTRG.32615.1	WRKY
MSTRG.32615.2	WRKY
MSTRG.33617.1	WRKY
MSTRG.33886.2	FAR1
MSTRG.33926.2	FAR1
MSTRG.34328.1	LBD
MSTRG.34344.1	NAC
MSTRG.34411.1	NAC
MSTRG.34499.2	bZIP
MSTRG.34540.13	bZIP
MSTRG.34540.4	bZIP
MSTRG.34639.1	bHLH
MSTRG.34711.1	NF-YB
MSTRG.34711.2	NF-YB
MSTRG.34711.3	NF-YB
MSTRG.34788.1	WRKY
MSTRG.34900.2	bZIP
MSTRG.34939.2	NF-YC
MSTRG.35065.1	CPP
MSTRG.35120.1	VOZ
MSTRG.35237.2	HSF
MSTRG.3538.1	WRKY
MSTRG.35573.1	WRKY
MSTRG.35607.1	bZIP
MSTRG.35607.3	bZIP
MSTRG.35624.1	WRKY
MSTRG.35735.1	WRKY
MSTRG.35735.2	WRKY
MSTRG.35745.1	WRKY
MSTRG.35769.1	bHLH
MSTRG.35784.1	CPP
MSTRG.35879.1	NAC
MSTRG.36111.3	BBR-BPC
MSTRG.3622.1	ZF-HD
MSTRG.3622.2	ZF-HD
MSTRG.36252.2	Whirly
MSTRG.36424.1	bHLH
MSTRG.37140.3	E2F/DP
MSTRG.37292.1	NAC
MSTRG.37376.1	bHLH
MSTRG.37779.2	CPP
MSTRG.3797.1	WRKY
MSTRG.3813.2	bZIP
MSTRG.38639.1	GATA
MSTRG.3867.1	WRKY
MSTRG.3867.2	WRKY
MSTRG.38770.2	FAR1
MSTRG.39049.1	GRAS
MSTRG.39248.1	bZIP
MSTRG.39739.1	GATA
MSTRG.39739.2	GATA
MSTRG.3982.1	E2F/DP
MSTRG.39970.1	bZIP
MSTRG.40399.1	FAR1
MSTRG.40415.1	bHLH
MSTRG.40415.3	bHLH
MSTRG.40415.7	bHLH
MSTRG.40682.4	CPP
MSTRG.40748.1	bHLH
MSTRG.41431.1	WRKY
MSTRG.41975.2	WRKY
MSTRG.4219.2	bHLH
MSTRG.42251.1	NAC
MSTRG.42351.1	Dof
MSTRG.43012.2	WRKY
MSTRG.43103.1	WRKY
MSTRG.43207.1	NF-YA
MSTRG.43207.2	NF-YA
MSTRG.43270.2	FAR1
MSTRG.43270.3	FAR1
MSTRG.43339.1	CAMTA
MSTRG.43440.1	GeBP
MSTRG.43826.1	WRKY
MSTRG.43826.2	WRKY
MSTRG.43864.2	NAC
MSTRG.43896.1	bZIP
MSTRG.43896.2	bZIP
MSTRG.44096.1	NAC
MSTRG.44476.1	NAC
MSTRG.44551.1	FAR1
MSTRG.44551.2	FAR1
MSTRG.44637.1	bZIP
MSTRG.44662.1	bHLH
MSTRG.44789.1	NF-YA
MSTRG.44801.1	WRKY
MSTRG.45152.1	FAR1
MSTRG.45152.2	FAR1
MSTRG.45152.4	FAR1
MSTRG.45152.5	FAR1
MSTRG.45302.1	WRKY
MSTRG.45302.2	WRKY
MSTRG.45460.1	FAR1
MSTRG.45815.1	bZIP
MSTRG.45907.1	CPP
MSTRG.45907.2	CPP
MSTRG.45907.3	CPP
MSTRG.45995.1	NF-YB
MSTRG.46263.1	FAR1
MSTRG.46379.2	bHLH
MSTRG.46424.1	ZF-HD
MSTRG.4658.1	VOZ
MSTRG.46658.1	bZIP
MSTRG.46895.1	WRKY
MSTRG.46895.2	WRKY
MSTRG.47037.1	SBP
MSTRG.47037.2	SBP
MSTRG.4729.1	CPP
MSTRG.47335.1	bZIP
MSTRG.4744.1	TCP
MSTRG.48192.1	WRKY
MSTRG.48587.1	WRKY
MSTRG.49186.1	bHLH
MSTRG.49266.1	YABBY
MSTRG.4929.1	bHLH
MSTRG.49478.1	GeBP
MSTRG.49514.1	bZIP
MSTRG.49514.3	bZIP
MSTRG.49520.2	HSF
MSTRG.49732.1	NF-YC
MSTRG.49739.1	WRKY
MSTRG.49795.1	bHLH
MSTRG.49809.1	EIL
MSTRG.49809.3	EIL
MSTRG.49856.1	NAC
MSTRG.49906.1	bHLH
MSTRG.49982.2	NAC
MSTRG.50039.1	bZIP
MSTRG.50074.1	bHLH
MSTRG.50134.1	HSF
MSTRG.50335.2	Nin-like
MSTRG.5061.1	bZIP
MSTRG.5118.1	bZIP
MSTRG.5187.1	NAC
MSTRG.5347.1	NF-YB
MSTRG.5585.2	bZIP
MSTRG.5615.1	NAC
MSTRG.5615.3	NAC
MSTRG.5658.1	bZIP
MSTRG.5658.2	bZIP
MSTRG.5819.1	NAC
MSTRG.6073.1	bHLH
MSTRG.6168.3	CAMTA
MSTRG.6180.1	TCP
MSTRG.6389.1	GRAS
MSTRG.6389.2	GRAS
MSTRG.6450.1	SRS
MSTRG.650.1	bZIP
MSTRG.6782.1	BBR-BPC
MSTRG.6784.1	BBR-BPC
MSTRG.7697.1	NAC
MSTRG.7755.1	GRAS
MSTRG.7798.1	CAMTA
MSTRG.7798.2	CAMTA
MSTRG.79.1	bHLH
MSTRG.79.3	bHLH
MSTRG.8150.1	HSF
MSTRG.8150.2	HSF
MSTRG.8150.3	HSF
MSTRG.8150.4	HSF
MSTRG.8150.8	HSF
MSTRG.826.2	NAC
MSTRG.8966.1	Trihelix
MSTRG.8968.1	Trihelix
MSTRG.9325.1	bHLH
MSTRG.9325.3	bHLH
MSTRG.9325.4	bHLH
MSTRG.9450.1	STAT
MSTRG.9450.2	STAT
MSTRG.9484.1	NAC
MSTRG.9724.1	WRKY
MSTRG.9728.2	WRKY
MSTRG.9733.1	WRKY
MSTRG.9896.1	bZIP
Os01t0182700-01	WRKY
Os01t0186000-01	WRKY
Os01t0203000-01	BES1
Os01t0218100-01	bHLH
Os01t0235700-01	bHLH
Os01t0235700-02	bHLH
Os01t0236700-01	Nin-like
Os01t0246500-01	Nin-like
Os01t0261200-01	NAC
Os01t0277500-01	Dof
Os01t0286100-01	bHLH
Os01t0343300-01	GATA
Os01t0542700-01	bZIP
Os01t0566800-00	bHLH
Os01t0575200-01	bHLH
Os01t0584900-01	WRKY
Os01t0635550-00	ZF-HD
Os01t0644500-00	Trihelix
Os01t0656400-00	WRKY
Os01t0674000-01	Trihelix
Os01t0675800-01	NAC
Os01t0678700-01	E2F/DP
Os01t0707500-01	bHLH
Os01t0718900-01	Trihelix
Os01t0730700-01	WRKY
Os01t0733200-01	HSF
Os01t0734000-01	WRKY
Os01t0749300-01	HSF
Os01t0749300-02	HSF
Os01t0750100-01	WRKY
Os01t0750100-02	WRKY
Os01t0750100-03	WRKY
Os01t0758200-01	Dof
Os01t0808100-01	bZIP
Os01t0813100-01	bZIP
Os01t0821600-01	WRKY
Os01t0826400-01	WRKY
Os01t0842200-01	GRAS
Os01t0842200-02	GRAS
Os01t0867300-01	bZIP
Os01t0881500-01	GRAS
Os01t0881500-02	GRAS
Os01t0884300-01	NAC
Os01t0888300-01	NAC
Os01t0900800-01	bHLH
Os01t0915600-01	bHLH
Os01t0922600-01	SBP
Os01t0923600-01	CAMTA
Os01t0923600-02	CAMTA
Os01t0924400-01	TCP
Os01t0925400-01	NAC
Os01t0928000-01	bHLH
Os01t0946200-01	NAC
Os01t0976800-01	GATA
Os02t0104500-01	Trihelix
Os02t0116600-01	bHLH
Os02t0116600-02	bHLH
Os02t0128200-02	bZIP
Os02t0132500-01	bZIP
Os02t0139400-01	SBP
Os02t0148500-01	GATA
Os02t0158400-01	Whirly
Os02t0170500-01	NF-YC
Os02t0174100-01	SBP
Os02t0174100-02	SBP
Os02t0174100-03	SBP
Os02t0174300-00	Trihelix
Os02t0175100-01	bZIP
Os02t0177300-00	SBP
Os02t0181300-01	WRKY
Os02t0182700-01	bZIP
Os02t0191600-00	bZIP
Os02t0194900-00	bZIP
Os02t0202800-01	FAR1
Os02t0214500-01	NAC
Os02t0220400-01	GATA
Os02t0232000-01	HSF
Os02t0265200-01	WRKY
Os02t0265200-02	WRKY
Os02t0266800-01	bZIP
Os02t0284500-01	FAR1
Os02t0285900-00	NAC
Os02t0288200-01	GeBP
Os02t0433600-01	bHLH
Os02t0462800-01	WRKY
Os02t0496100-01	HSF
Os02t0527300-01	HSF
Os02t0539600-01	Trihelix
Os02t0542200-02	FAR1
Os02t0542400-01	Trihelix
Os02t0565000-01	Trihelix
Os02t0579000-02	NAC
Os02t0608100-01	FAR1
Os02t0608300-01	FAR1
Os02t0643200-01	YABBY
Os02t0645600-01	GATA
Os02t0662700-01	GRAS
Os02t0663100-01	GRAS
Os02t0673700-01	Dof
Os02t0673700-02	Dof
Os02t0681900-01	GRAS
Os02t0689132-00	EIL
Os02t0705500-01	bHLH
Os02t0726300-03	Dof
Os02t0747400-01	TCP
Os02t0766700-01	bZIP
Os02t0768700-01	GeBP
Os02t0771200-01	GeBP
Os02t0776400-01	NF-YA
Os02t0822400-01	NAC
Os02t0828566-01	TCP
Os02t0833600-01	bZIP
Os03t0103400-01	GRAS
Os03t0113500-01	Trihelix
Os03t0119966-01	NAC
Os03t0131100-01	Nin-like
Os03t0133000-01	NAC
Os03t0169600-01	Dof
Os03t0174900-01	NF-YA
Os03t0191000-01	CAMTA
Os03t0193000-01	GRAS
Os03t0224700-01	HSF
Os03t0239400-01	bZIP
Os03t0251350-00	NF-YC
Os03t0255000-01	FAR1
Os03t0255400-01	FAR1
Os03t0306700-01	bZIP
Os03t0318600-01	bZIP
Os03t0321700-01	WRKY
Os03t0324200-01	EIL
Os03t0324200-02	EIL
Os03t0324300-02	EIL
Os03t0324300-03	EIL
Os03t0324300-04	EIL
Os03t0324300-05	EIL
Os03t0324300-06	EIL
Os03t0327100-01	NAC
Os03t0327800-01	NAC
Os03t0336200-02	bZIP
Os03t0370250-01	GeBP
Os03t0379300-01	bHLH
Os03t0379300-02	bHLH
Os03t0411100-01	NF-YA
Os03t0411100-02	NF-YA
Os03t0413000-01	NF-YB
Os03t0444900-00	WRKY
Os03t0609500-01	LBD
Os03t0639300-01	bHLH
Os03t0647600-01	NF-YA
Os03t0655600-02	FAR1
Os03t0657400-00	WRKY
Os03t0684000-01	GATA
Os03t0690600-01	GRAS
Os03t0690600-02	GRAS
Os03t0696300-01	NF-YA
Os03t0707600-01	GRAS
Os03t0708800-01	GeBP
Os03t0708800-03	GeBP
Os03t0723000-02	GRAS
Os03t0725800-01	bHLH
Os03t0734900-00	GATA
Os03t0741100-01	bHLH
Os03t0741400-01	WRKY
Os03t0758000-01	WRKY
Os03t0782500-01	bHLH
Os03t0795900-01	HSF
Os03t0797600-01	bHLH
Os03t0797600-02	bHLH
Os03t0802900-01	bHLH
Os03t0815100-01	NAC
Os03t0831200-01	GATA
Os03t0833300-02	SBP
Os03t0833300-04	SBP
Os03t0843700-01	FAR1
Os03t0852300-01	NF-YC
Os03t0854500-01	HSF
Os03t0854500-02	HSF
Os04t0194600-01	TCP
Os04t0287400-01	WRKY
Os04t0300600-00	bHLH
Os04t0301500-01	bHLH
Os04t0388500-01	CAMTA
Os04t0408700-01	S1Fa-like
Os04t0408900-01	S1Fa-like
Os04t0408900-02	S1Fa-like
Os04t0443000-01	FAR1
Os04t0445600-00	Trihelix
Os04t0460600-02	NAC
Os04t0476500-02	FAR1
Os04t0486400-01	Trihelix
Os04t0489600-02	bHLH
Os04t0495800-01	Nin-like
Os04t0495800-02	Nin-like
Os04t0515900-01	NAC
Os04t0539500-01	GATA
Os04t0539500-02	GATA
Os04t0544500-01	GATA
Os04t0545000-01	WRKY
Os04t0555000-01	GRAS
Os04t0557500-01	bHLH
Os04t0567800-01	Dof
Os04t0568700-00	HSF
Os04t0580300-01	GRAS
Os04t0597300-01	WRKY
Os04t0605100-01	WRKY
Os04t0618600-01	bHLH
Os04t0631600-01	bHLH
Os04t0656500-01	SBP
Os04t0678400-01	Dof
Os05t0103000-01	bHLH
Os05t0112200-01	Dof
Os05t0129300-02	bZIP
Os05t0129800-01	WRKY
Os05t0155400-01	GATA
Os05t0183100-01	WRKY
Os05t0194500-01	NAC
Os05t0317300-01	FAR1
Os05t0322900-01	WRKY
Os05t0343400-01	WRKY
Os05t0408200-01	SBP
Os05t0411300-01	bZIP
Os05t0426200-02	NAC
Os05t0437700-01	bZIP
Os05t0443900-01	bZIP
Os05t0474800-01	WRKY
Os05t0489700-01	bZIP
Os05t0495200-02	bZIP
Os05t0500600-01	GRAS
Os05t0509400-01	CPP
Os05t0513100-01	TCP
Os05t0520300-00	GATA
Os05t0537100-00	WRKY
Os05t0560600-01	Trihelix
Os05t0560600-02	Trihelix
Os05t0569300-01	bZIP
Os05t0573500-01	NF-YB
Os05t0574900-01	GRAS
Os05t0579300-01	ZF-HD
Os05t0583000-01	WRKY
Os06t0101800-01	NAC
Os06t0105350-01	GRAS
Os06t0145800-00	Whirly
Os06t0146250-00	WRKY
Os06t0158100-00	WRKY
Os06t0164400-01	bHLH
Os06t0166100-01	FAR1
Os06t0193400-01	bHLH
Os06t0211200-01	bZIP
Os06t0211200-02	bZIP
Os06t0252300-01	NF-X1
Os06t0267500-01	NAC
Os06t0275600-01	bHLH
Os06t0275600-02	bHLH
Os06t0284500-00	Dof
Os06t0476100-01	GRAS
Os06t0552300-01	BES1
Os06t0553100-01	HSF
Os06t0597800-01	FAR1
Os06t0613500-01	bHLH
Os06t0614100-01	bZIP
Os06t0622700-01	bZIP
Os06t0649000-01	WRKY
Os06t0662200-01	bZIP
Os06t0663500-00	SBP
Os06t0667100-01	NF-YC
Os06t0675600-01	NAC
Os06t0698900-01	GATA
Os06t0703500-03	SBP
Os06t0716800-02	bZIP
Os06t0719500-00	bZIP
Os06t0724000-01	bZIP
Os06t0726300-01	NAC
Os07t0111400-00	WRKY
Os07t0124300-00	bZIP
Os07t0141500-01	FAR1
Os07t0143200-01	bHLH
Os07t0152000-01	TCP
Os07t0178600-01	HSF
Os07t0182000-01	bZIP
Os07t0209800-01	bZIP
Os07t0225300-01	NAC
Os07t0236700-01	Dof
Os07t0272700-00	NAC
Os07t0490200-01	CAMTA
Os07t0496300-01	FAR1
Os07t0505200-01	SBP
Os07t0543000-01	bHLH
Os07t0543000-02	bHLH
Os07t0545800-01	GRAS
Os07t0563600-01	FAR1
Os07t0567700-02	GRAS
Os07t0567700-03	GRAS
Os07t0580500-01	BES1
Os07t0583600-01	GRAS
Os07t0583600-02	GRAS
Os07t0583600-03	GRAS
Os07t0583700-01	WRKY
Os07t0586700-01	HRT-like
Os07t0589000-01	LBD
Os07t0606600-01	NF-YB
Os07t0615900-01	FAR1
Os07t0615900-02	FAR1
Os07t0644100-01	bZIP
Os07t0683200-01	NAC
Os07t0684800-01	NAC
Os07t0685000-02	Dof
Os07t0685700-01	EIL
Os07t0686100-01	bZIP
Os07t0687700-01	bZIP
Os08t0138500-01	bHLH
Os08t0157900-01	NAC
Os08t0174500-01	NF-YB
Os08t0176900-01	bZIP
Os08t0196700-01	NF-YA
Os08t0198900-01	WRKY
Os08t0200600-01	NAC
Os08t0235800-00	WRKY
Os08t0276200-01	WRKY
Os08t0369600-01	CPP
Os08t0386200-01	WRKY
Os08t0433500-01	NAC
Os08t0467600-00	GeBP
Os08t0472000-01	bZIP
Os08t0484700-01	Trihelix
Os08t0486233-00	EIL
Os08t0487100-01	bZIP
Os08t0490100-01	Dof
Os08t0496500-01	NF-YC
Os08t0499300-02	WRKY
Os08t0506700-01	bHLH
Os08t0524800-01	bHLH
Os08t0535800-01	NAC
Os08t0535800-02	NAC
Os08t0536800-01	bHLH
Os08t0543700-00	bHLH
Os08t0544800-01	TCP
Os08t0546800-01	HSF
Os08t0562200-02	NAC
Os09t0100800-01	GeBP
Os09t0280500-01	bZIP
Os09t0306400-01	bZIP
Os09t0334500-01	WRKY
Os09t0410700-00	bHLH
Os09t0414600-02	ZF-HD
Os09t0417600-01	WRKY
Os09t0417600-02	WRKY
Os09t0417600-04	WRKY
Os09t0417800-02	WRKY
Os09t0425700-01	YABBY
Os09t0455300-01	bHLH
Os09t0456200-01	bZIP
Os09t0456800-01	HSF
Os09t0466400-01	ZF-HD
Os09t0474100-01	bHLH
Os09t0475400-01	bHLH
Os09t0475400-02	bHLH
Os09t0475800-01	Dof
Os09t0481700-01	WRKY
Os09t0481700-02	WRKY
Os09t0487900-01	bHLH
Os09t0491532-01	SBP
Os09t0493700-01	NAC
Os09t0497900-01	NAC
Os09t0501600-01	bHLH
Os09t0507100-00	SBP
Os09t0509100-01	NAC
Os09t0516200-01	bZIP
Os09t0521300-00	TCP
Os09t0526600-02	HSF
Os09t0526600-03	HSF
Os09t0540800-01	bZIP
Os09t0558200-01	Trihelix
Os09t0558200-02	Trihelix
Os09t0568200-01	NF-YB
Os10t0114500-01	BBR-BPC
Os10t0115200-01	BBR-BPC
Os10t0359500-01	NAC
Os10t0375600-01	CAMTA
Os10t0381800-01	FAR1
Os10t0406300-01	Dof
Os10t0413700-01	NAC
Os10t0419300-01	HSF
Os10t0440100-00	E2F/DP
Os10t0551200-01	GRAS
Os10t0556200-01	bHLH
Os10t0564200-01	Trihelix
Os10t0575000-01	bHLH
Os11t0106900-01	LBD
Os11t0116900-01	WRKY
Os11t0117500-01	WRKY
Os11t0124300-01	GRAS
Os11t0127000-01	NAC
Os11t0127600-01	NAC
Os11t0128300-01	ZF-HD
Os11t0139500-01	bZIP
Os11t0139500-03	bZIP
Os11t0154500-01	NAC
Os11t0158500-01	bHLH
Os11t0163500-01	Trihelix
Os11t0175700-00	TCP
Os11t0184900-02	NAC
Os11t0218000-01	bZIP
Os11t0243300-01	ZF-HD
Os11t0490900-01	WRKY
Os11t0496600-00	SBP
Os11t0544700-01	NF-YC
Os11t0601700-01	bHLH
Os11t0634700-00	bHLH
Os11t0685700-00	WRKY
Os11t0686250-00	WRKY
Os11t0705200-01	GRAS
Os11t0705900-01	GRAS
Os11t0706200-00	GRAS
Os12t0106200-01	LBD
Os12t0116400-00	WRKY
Os12t0116600-01	WRKY
Os12t0122000-01	GRAS
Os12t0123700-01	NAC
Os12t0124500-01	ZF-HD
Os12t0137000-00	NAC
Os12t0152900-01	bZIP
Os12t0158800-01	E2F/DP
Os12t0160900-01	FAR1
Os12t0162500-01	bZIP
Os12t0163500-01	Trihelix
Os12t0168800-01	GATA
Os12t0194600-02	bZIP
Os12t0233800-02	bZIP
Os12t0233800-03	bZIP
Os12t0477400-01	NAC
Os12t0569900-01	Dof
Os12t0573200-01	GRAS
Os12t0597700-01	WRKY
Os12t0597700-02	WRKY
Os12t0605300-01	CPP
Os12t0605500-01	CPP
Os12t0610200-01	bHLH
Os12t0610600-01	NAC
Os12t0613000-01	NF-YA
Os12t0618600-01	NF-YA
Os12t0621100-01	YABBY
Os12t0621100-02	YABBY
Os12t0624900-01	GATA
Os12t0634500-00	bZIP
MSTRG.16518.1	ARF
MSTRG.19094.1	ARF
MSTRG.19094.3	ARF
MSTRG.29516.1	ARF
MSTRG.29516.3	ARF
MSTRG.30226.3	ARF
MSTRG.35548.2	ARF
MSTRG.35548.4	ARF
MSTRG.39782.1	ARF
MSTRG.4663.1	ARF
MSTRG.47098.1	ARF
MSTRG.8630.1	ARF
Os01t0670800-02	ARF
Os01t0753500-01	ARF
Os01t0927600-01	ARF
Os02t0164900-01	ARF
Os02t0164900-02	ARF
Os02t0557200-01	ARF
Os02t0628600-01	ARF
Os04t0442000-01	ARF
Os04t0671900-01	ARF
Os04t0690600-01	ARF
Os05t0515400-01	ARF
Os05t0563400-01	ARF
Os06t0196700-01	ARF
Os06t0196700-02	ARF
Os06t0677800-01	ARF
Os06t0685700-01	ARF
Os07t0183100-00	ARF
Os12t0479400-01	ARF
Os12t0479400-02	ARF
Os12t0613700-01	ARF
MSTRG.1256.2	B3
MSTRG.22118.1	B3
MSTRG.22118.3	B3
MSTRG.25114.1	B3
MSTRG.34844.4	B3
MSTRG.42824.1	B3
MSTRG.42824.3	B3
MSTRG.42824.4	B3
MSTRG.43977.2	B3
MSTRG.45595.1	B3
Os02t0764100-01	B3
Os03t0120900-01	B3
Os03t0620400-01	B3
Os04t0581400-01	B3
Os05t0481400-01	B3
Os06t0194400-01	B3
Os07t0679700-01	B3
Os08t0101000-01	B3
Os08t0324300-01	B3
Os11t0197600-01	B3
MSTRG.26962.3	AP2
MSTRG.31370.1	AP2
MSTRG.31370.4	AP2
MSTRG.41173.1	AP2
MSTRG.41173.2	AP2
MSTRG.41173.5	AP2
MSTRG.41173.7	AP2
MSTRG.44595.1	AP2
MSTRG.49248.1	AP2
Os03t0818800-01	AP2
Os05t0121600-01	AP2
Os07t0235800-01	AP2
Os08t0442400-01	AP2
MSTRG.31370.3	AP2
MSTRG.41173.3	AP2
MSTRG.32026.2	AP2
MSTRG.18609.1	ERF
MSTRG.18609.2	ERF
MSTRG.21025.2	ERF
MSTRG.22277.1	ERF
MSTRG.22281.1	ERF
MSTRG.30293.1	ERF
MSTRG.33569.1	ERF
MSTRG.33726.1	ERF
MSTRG.36931.1	ERF
MSTRG.46669.1	ERF
MSTRG.48387.1	ERF
MSTRG.48387.2	ERF
MSTRG.49248.3	ERF
MSTRG.49345.1	ERF
MSTRG.5663.1	ERF
MSTRG.580.1	ERF
Os01t0131600-02	ERF
Os01t0165000-02	ERF
Os01t0224100-02	ERF
Os01t0313300-01	ERF
Os01t0752500-01	ERF
Os01t0797600-01	ERF
Os01t0885900-00	ERF
Os02t0499000-01	ERF
Os02t0638650-01	ERF
Os02t0654700-01	ERF
Os02t0656600-00	ERF
Os02t0676800-01	ERF
Os02t0677300-02	ERF
Os02t0752800-01	ERF
Os02t0752800-02	ERF
Os02t0764700-01	ERF
Os02t0782700-01	ERF
Os02t0782700-02	ERF
Os03t0182800-01	ERF
Os03t0183000-01	ERF
Os03t0183000-02	ERF
Os03t0183300-01	ERF
Os03t0815800-01	ERF
Os03t0860100-01	ERF
Os04t0398000-01	ERF
Os04t0546800-01	ERF
Os04t0550200-01	ERF
Os04t0610400-01	ERF
Os04t0648900-02	ERF
Os04t0669200-01	ERF
Os05t0316800-01	ERF
Os05t0346200-01	ERF
Os05t0473300-01	ERF
Os05t0497300-01	ERF
Os05t0572000-00	ERF
Os06t0127100-01	ERF
Os06t0166400-01	ERF
Os06t0181700-01	ERF
Os06t0194000-01	ERF
Os06t0194000-02	ERF
Os06t0691100-00	ERF
Os07t0227600-00	ERF
Os07t0617000-01	ERF
Os07t0617000-02	ERF
Os08t0408500-01	ERF
Os08t0521600-01	ERF
Os09t0286600-01	ERF
Os09t0286600-03	ERF
Os09t0287000-01	ERF
Os09t0309700-01	ERF
Os09t0434500-01	ERF
Os09t0457900-01	ERF
Os09t0522100-00	ERF
Os09t0522200-01	ERF
Os09t0571700-00	ERF
Os09t0572000-01	ERF
Os11t0168500-00	ERF
MSTRG.19506.1	DBB
MSTRG.30011.1	DBB
MSTRG.30379.1	DBB
MSTRG.39895.1	DBB
Os01t0202500-01	DBB
Os02t0606200-01	DBB
Os02t0646200-01	DBB
Os04t0540200-01	DBB
Os05t0204600-01	DBB
Os06t0152200-01	DBB
Os06t0152200-02	DBB
Os09t0527900-01	DBB
Os12t0209200-01	DBB
MSTRG.16873.1	CO-like
MSTRG.20516.1	CO-like
MSTRG.20516.4	CO-like
MSTRG.37264.1	CO-like
MSTRG.39323.1	CO-like
MSTRG.45168.1	CO-like
MSTRG.47259.1	CO-like
MSTRG.49990.1	CO-like
Os02t0178100-01	CO-like
Os02t0610500-01	CO-like
Os02t0731700-02	CO-like
Os03t0711100-01	CO-like
Os04t0497700-01	CO-like
Os06t0264200-00	CO-like
Os06t0275000-01	CO-like
Os07t0667300-01	CO-like
Os09t0240200-01	CO-like
MSTRG.16919.1	ARR-B
MSTRG.22685.2	ARR-B
Os01t0904700-01	ARR-B
Os02t0182100-01	ARR-B
Os02t0796500-01	ARR-B
Os02t0796500-02	ARR-B
Os02t0796500-03	ARR-B
Os03t0224200-01	ARR-B
Os03t0224200-02	ARR-B
Os06t0183100-01	ARR-B
MSTRG.1310.1	G2-like
MSTRG.1310.2	G2-like
MSTRG.1310.3	G2-like
MSTRG.15633.1	G2-like
MSTRG.15666.1	G2-like
MSTRG.16493.1	G2-like
MSTRG.20266.1	G2-like
MSTRG.23675.2	G2-like
MSTRG.30887.1	G2-like
MSTRG.31508.2	G2-like
MSTRG.34289.1	G2-like
MSTRG.34887.1	G2-like
MSTRG.34887.2	G2-like
MSTRG.34922.4	G2-like
MSTRG.34922.5	G2-like
MSTRG.38940.1	G2-like
MSTRG.39795.2	G2-like
MSTRG.39795.4	G2-like
MSTRG.41838.2	G2-like
MSTRG.43872.2	G2-like
MSTRG.45748.1	G2-like
MSTRG.46314.2	G2-like
MSTRG.46402.1	G2-like
MSTRG.6602.1	G2-like
MSTRG.683.1	G2-like
MSTRG.9634.1	G2-like
Os01t0239000-02	G2-like
Os01t0844900-01	G2-like
Os01t0971800-01	G2-like
Os02t0325600-01	G2-like
Os02t0700300-01	G2-like
Os03t0325500-01	G2-like
Os03t0329900-01	G2-like
Os03t0764600-01	G2-like
Os04t0566600-01	G2-like
Os04t0600000-01	G2-like
Os04t0665600-01	G2-like
Os05t0412000-00	G2-like
Os05t0491500-01	G2-like
Os05t0491500-02	G2-like
Os06t0348800-01	G2-like
Os06t0348800-03	G2-like
Os06t0664800-01	G2-like
Os06t0670300-01	G2-like
Os06t0703900-01	G2-like
Os06t0703900-02	G2-like
Os07t0119300-01	G2-like
Os07t0438800-01	G2-like
Os07t0438800-02	G2-like
Os08t0346400-01	G2-like
Os08t0346400-02	G2-like
Os08t0346500-00	G2-like
Os08t0426866-00	G2-like
Os09t0299000-02	G2-like
Os09t0299200-01	G2-like
Os12t0105600-01	G2-like
Os12t0586300-00	G2-like
MSTRG.20581.2	MIKC_MADS
MSTRG.20581.3	MIKC_MADS
MSTRG.20581.4	MIKC_MADS
MSTRG.21722.2	MIKC_MADS
MSTRG.22312.1	MIKC_MADS
MSTRG.31045.1	MIKC_MADS
MSTRG.35942.1	MIKC_MADS
MSTRG.35942.3	MIKC_MADS
MSTRG.35942.4	MIKC_MADS
MSTRG.39889.1	MIKC_MADS
MSTRG.44081.2	MIKC_MADS
MSTRG.9149.2	MIKC_MADS
Os01t0201700-01	MIKC_MADS
Os02t0579600-00	MIKC_MADS
Os02t0731200-01	MIKC_MADS
Os02t0761000-01	MIKC_MADS
Os03t0122600-01	MIKC_MADS
Os03t0122600-02	MIKC_MADS
Os03t0186600-01	MIKC_MADS
Os03t0215400-01	MIKC_MADS
Os03t0752800-02	MIKC_MADS
Os06t0108500-01	MIKC_MADS
Os06t0217300-01	MIKC_MADS
Os06t0667200-01	MIKC_MADS
Os07t0605200-01	MIKC_MADS
Os10t0536100-01	MIKC_MADS
MSTRG.29047.3	M-type_MADS
MSTRG.29048.1	M-type_MADS
MSTRG.29048.2	M-type_MADS
MSTRG.29048.3	M-type_MADS
MSTRG.34388.1	M-type_MADS
MSTRG.6161.2	M-type_MADS
Os01t0340400-00	M-type_MADS
Os01t0922800-01	M-type_MADS
Os01t0975800-00	M-type_MADS
Os04t0387300-01	M-type_MADS
Os06t0223300-01	M-type_MADS
MSTRG.36000.3	GRF
MSTRG.42030.1	GRF
Os03t0729500-01	GRF
Os06t0116200-01	GRF
Os07t0467500-01	GRF
MSTRG.16569.1	HB-other
MSTRG.26499.1	HB-other
MSTRG.35542.2	HB-other
MSTRG.36998.2	HB-other
MSTRG.38072.3	HB-other
MSTRG.3932.1	HB-other
MSTRG.43308.1	HB-other
MSTRG.7006.1	HB-other
MSTRG.7006.3	HB-other
Os01t0934300-01	HB-other
Os02t0147800-02	HB-other
Os03t0680800-04	HB-other
Os03t0769800-01	HB-other
Os05t0188600-02	HB-other
Os06t0485100-01	HB-other
Os06t0485100-02	HB-other
Os06t0485100-03	HB-other
Os06t0601000-01	HB-other
Os05t0118700-01	WOX
Os03t0325600-02	WOX
MSTRG.5217.3	WOX
Os01t0818400-03	WOX
Os01t0818400-01	WOX
Os12t0636200-03	TALE
Os12t0636200-02	TALE
Os12t0636200-01	TALE
MSTRG.25655.6	TALE
Os03t0680800-01	TALE
Os03t0680800-05	TALE
MSTRG.26130.1	TALE
MSTRG.10064.1	TALE
MSTRG.10064.2	TALE
MSTRG.10064.3	TALE
MSTRG.13478.4	TALE
Os12t0160500-01	TALE
Os03t0165300-01	TALE
Os03t0165300-02	TALE
Os03t0165300-03	TALE
Os06t0108900-02	TALE
Os01t0848400-01	TALE
MSTRG.9139.1	TALE
Os10t0534900-01	TALE
Os05t0455200-01	TALE
Os11t0158600-00	TALE
MSTRG.21737.1	TALE
Os03t0124000-01	TALE
MSTRG.35944.5	TALE
MSTRG.35944.3	TALE
Os08t0416000-02	HD-ZIP
MSTRG.46744.1	HD-ZIP
MSTRG.46744.2	HD-ZIP
Os08t0481400-01	HD-ZIP
MSTRG.49633.1	HD-ZIP
Os08t0416000-01	HD-ZIP
Os02t0729700-01	HD-ZIP
Os02t0729700-02	HD-ZIP
MSTRG.20559.2	HD-ZIP
MSTRG.46238.2	HD-ZIP
Os09t0470500-01	HD-ZIP
Os03t0188900-01	HD-ZIP
Os03t0188900-02	HD-ZIP
MSTRG.22338.2	HD-ZIP
MSTRG.49445.1	HD-ZIP
MSTRG.19166.1	HD-ZIP
Os10t0561800-01	HD-ZIP
Os02t0565600-01	HD-ZIP
MSTRG.9386.2	HD-ZIP
MSTRG.6699.1	HD-ZIP
Os09t0379600-00	HD-ZIP
MSTRG.50150.1	HD-ZIP
MSTRG.48881.1	HD-ZIP
Os04t0541700-01	HD-ZIP
Os02t0149900-00	HD-ZIP
MSTRG.46611.1	HD-ZIP
MSTRG.9202.1	HD-ZIP
MSTRG.25576.1	TALE
Os06t0646600-02	TALE
Os06t0646600-01	TALE
MSTRG.39246.2	TALE
Os08t0292900-01	TALE
MSTRG.45399.3	TALE
MSTRG.45399.2	TALE
MSTRG.16929.1	TALE
Os02t0182800-01	TALE
MSTRG.44714.2	HD-ZIP
MSTRG.31188.1	HD-ZIP
Os08t0136100-01	HD-ZIP
Os02t0674800-01	HD-ZIP
MSTRG.20080.1	HD-ZIP
MSTRG.50131.1	HD-ZIP
Os03t0640800-01	HD-ZIP
Os12t0612700-01	HD-ZIP
Os03t0109400-02	HD-ZIP
MSTRG.30624.2	HD-ZIP
Os10t0480200-02	HD-ZIP
Os08t0292000-02	HD-ZIP
Os08t0292000-01	HD-ZIP
MSTRG.45391.3	HD-ZIP
Os06t0229300-01	HB-PHD
MSTRG.11445.2	C3H
MSTRG.11623.1	C2H2
MSTRG.11623.3	C2H2
MSTRG.14235.3	C3H
MSTRG.14235.4	C3H
MSTRG.14363.2	C3H
MSTRG.14363.3	C3H
MSTRG.14363.4	C3H
MSTRG.1466.3	C3H
MSTRG.15085.1	C3H
MSTRG.16274.1	C2H2
MSTRG.16274.2	C2H2
MSTRG.16274.4	C2H2
MSTRG.16274.5	C2H2
MSTRG.16274.6	C2H2
MSTRG.16702.2	C3H
MSTRG.16702.8	C3H
MSTRG.17058.1	C3H
MSTRG.17058.4	C3H
MSTRG.17058.5	C3H
MSTRG.19131.1	C2H2
MSTRG.20056.1	C2H2
MSTRG.20112.1	C3H
MSTRG.21248.17	LSD
MSTRG.21248.2	LSD
MSTRG.21248.4	LSD
MSTRG.21248.5	LSD
MSTRG.21628.1	C3H
MSTRG.21628.6	C3H
MSTRG.21997.1	C2H2
MSTRG.21997.2	C2H2
MSTRG.21997.3	C2H2
MSTRG.22437.1	C2H2
MSTRG.22838.2	C2H2
MSTRG.25794.1	C3H
MSTRG.27367.1	C3H
MSTRG.29490.1	C3H
MSTRG.30598.1	C2H2
MSTRG.30598.2	C2H2
MSTRG.30598.3	C2H2
MSTRG.30598.4	C2H2
MSTRG.30598.5	C2H2
MSTRG.30598.7	C2H2
MSTRG.3067.1	C3H
MSTRG.31510.1	C3H
MSTRG.31862.1	C2H2
MSTRG.31862.2	C2H2
MSTRG.32105.1	C3H
MSTRG.3445.3	C3H
MSTRG.34963.1	C3H
MSTRG.35676.2	C3H
MSTRG.35858.2	C2H2
MSTRG.39021.1	C3H
MSTRG.39021.2	C3H
MSTRG.39159.1	C3H
MSTRG.39159.3	C3H
MSTRG.39537.3	C3H
MSTRG.39799.2	C3H
MSTRG.42879.3	C3H
MSTRG.42998.1	C2H2
MSTRG.43465.1	C2H2
MSTRG.44218.2	C3H
MSTRG.44218.3	C3H
MSTRG.44218.7	C3H
MSTRG.44250.1	LSD
MSTRG.44488.2	LSD
MSTRG.44488.3	LSD
MSTRG.44488.4	LSD
MSTRG.44495.1	C3H
MSTRG.45469.1	C2H2
MSTRG.46788.10	C2H2
MSTRG.46788.11	C2H2
MSTRG.46788.14	C2H2
MSTRG.46788.2	C2H2
MSTRG.47445.1	C2H2
MSTRG.47445.2	C2H2
MSTRG.4877.1	C2H2
MSTRG.50382.1	C2H2
MSTRG.50511.3	C2H2
MSTRG.6029.3	C2H2
MSTRG.6029.4	C2H2
MSTRG.6029.6	C2H2
MSTRG.6032.1	C2H2
MSTRG.6032.2	C2H2
MSTRG.6093.1	C3H
MSTRG.6093.3	C3H
MSTRG.7123.1	C2H2
Os01t0192000-01	C3H
Os01t0195000-01	C2H2
Os01t0252200-01	C3H
Os01t0257400-01	C3H
Os01t0258700-01	C3H
Os01t0258700-03	C3H
Os01t0572100-01	C3H
Os01t0572300-01	C2H2
Os01t0612700-01	LSD
Os01t0612700-02	LSD
Os01t0616400-01	C3H
Os01t0616400-02	C3H
Os01t0838600-00	C2H2
Os01t0859100-01	C2H2
Os01t0871200-01	C2H2
Os01t0871200-02	C2H2
Os01t0871200-03	C2H2
Os01t0871200-04	C2H2
Os01t0907400-01	C2H2
Os01t0909100-01	C2H2
Os01t0917400-01	C3H
Os02t0161200-01	C3H
Os02t0194200-01	C3H
Os02t0301000-01	C3H
Os02t0551900-01	C2H2
Os02t0557500-01	C3H
Os02t0572900-01	C2H2
Os02t0672100-01	C2H2
Os02t0677700-01	C3H
Os02t0677700-02	C3H
Os02t0807700-01	LSD
Os02t0823900-00	C2H2
Os03t0112700-01	C3H
Os03t0112700-02	C3H
Os03t0148800-01	C2H2
Os03t0197800-00	C2H2
Os03t0239300-01	C2H2
Os03t0239300-03	C2H2
Os03t0437200-01	C2H2
Os03t0698800-01	C3H
Os03t0764100-01	C2H2
Os03t0820300-01	C2H2
Os03t0820400-01	C2H2
Os04t0105000-01	C3H
Os04t0115500-00	C2H2
Os04t0117600-01	C3H
Os04t0162500-01	C2H2
Os04t0464600-01	C2H2
Os04t0552400-01	C2H2
Os04t0665700-01	C3H
Os04t0671800-01	C3H
Os05t0106000-01	C2H2
Os05t0121400-01	C2H2
Os05t0128200-01	C3H
Os05t0195200-01	C3H
Os05t0444200-01	C2H2
Os05t0525900-01	C3H
Os05t0597100-01	C2H2
Os06t0166200-01	C2H2
Os06t0318700-01	C3H
Os06t0612300-01	C2H2
Os06t0618100-01	C3H
Os06t0638000-00	C3H
Os06t0677700-00	C3H
Os06t0704300-01	C3H
Os07t0569700-01	C2H2
Os08t0135800-01	C3H
Os08t0135800-04	C3H
Os08t0159500-01	LSD
Os08t0485600-01	C2H2
Os08t0485600-02	C2H2
Os08t0485700-01	C2H2
Os08t0485700-02	C2H2
Os08t0491700-00	C3H
Os08t0554400-01	C2H2
Os08t0562300-01	C2H2
Os09t0449400-01	C2H2
Os09t0485600-01	C2H2
Os09t0530600-01	C3H
Os10t0419200-01	C2H2
Os11t0472000-02	C3H
Os11t0498400-01	C2H2
Os11t0707300-00	C2H2
Os12t0170400-01	C2H2
Os12t0278800-02	C3H
Os12t0278800-03	C3H
Os12t0279100-01	C2H2
Os12t0405100-01	C3H
Os12t0515500-01	C3H
Os12t0583700-00	C2H2
MSTRG.12913.1	MYB
MSTRG.12913.2	MYB
MSTRG.12913.3	MYB
MSTRG.1606.1	MYB
MSTRG.34671.1	MYB
MSTRG.38893.1	MYB
MSTRG.401.1	MYB
MSTRG.40393.3	MYB
MSTRG.4042.1	MYB
MSTRG.43385.1	MYB
MSTRG.46323.1	MYB
MSTRG.46418.2	MYB
MSTRG.47402.1	MYB
MSTRG.5150.3	MYB
MSTRG.5418.2	MYB
MSTRG.5621.1	MYB
MSTRG.5727.1	MYB
MSTRG.6641.1	MYB
MSTRG.830.1	MYB
MSTRG.8610.1	MYB
Os01t0142500-01	MYB
Os01t0191900-01	MYB
Os01t0305900-01	MYB
Os01t0841500-01	MYB
Os01t0850400-01	MYB
Os01t0853700-01	MYB
Os01t0874300-01	MYB
Os02t0187700-00	MYB
Os02t0271900-01	MYB
Os02t0624300-01	MYB
Os03t0315400-01	MYB
Os03t0720800-01	MYB
Os04t0348300-01	MYB
Os04t0377932-00	MYB
Os04t0532800-01	MYB
Os05t0429900-01	MYB
Os05t0449900-01	MYB
Os05t0553400-01	MYB
Os06t0258000-01	MYB
Os06t0637500-02	MYB
Os07t0627300-01	MYB
Os07t0688200-01	MYB
Os08t0151300-01	MYB
Os08t0549000-01	MYB
Os09t0106700-01	MYB
Os09t0532900-04	MYB
Os09t0538400-01	MYB
Os11t0180900-00	MYB
Os11t0207600-00	MYB
Os11t0558200-01	MYB
Os11t0684000-01	MYB
Os12t0175400-01	MYB
MSTRG.15469.1	MYB_related
MSTRG.15469.2	MYB_related
MSTRG.15469.4	MYB_related
MSTRG.17757.3	MYB_related
MSTRG.19032.1	MYB_related
MSTRG.20132.2	MYB_related
MSTRG.20353.3	MYB_related
MSTRG.20968.2	MYB_related
MSTRG.20968.8	MYB_related
MSTRG.26300.1	MYB_related
MSTRG.27147.1	MYB_related
MSTRG.29066.2	MYB_related
MSTRG.29066.3	MYB_related
MSTRG.31630.4	MYB_related
MSTRG.31963.2	MYB_related
MSTRG.3216.2	MYB_related
MSTRG.3216.5	MYB_related
MSTRG.32714.1	MYB_related
MSTRG.32714.6	MYB_related
MSTRG.3320.2	MYB_related
MSTRG.3482.1	MYB_related
MSTRG.35796.1	MYB_related
MSTRG.35921.1	MYB_related
MSTRG.36556.1	MYB_related
MSTRG.36556.3	MYB_related
MSTRG.37577.1	MYB_related
MSTRG.37577.2	MYB_related
MSTRG.38039.2	MYB_related
MSTRG.39462.1	MYB_related
MSTRG.39462.2	MYB_related
MSTRG.40038.1	MYB_related
MSTRG.40038.2	MYB_related
MSTRG.41799.1	MYB_related
MSTRG.42162.1	MYB_related
MSTRG.42162.2	MYB_related
MSTRG.42162.3	MYB_related
MSTRG.42162.5	MYB_related
MSTRG.42162.6	MYB_related
MSTRG.4245.1	MYB_related
MSTRG.44349.2	MYB_related
MSTRG.44390.1	MYB_related
MSTRG.44473.2	MYB_related
MSTRG.44473.3	MYB_related
MSTRG.44473.4	MYB_related
MSTRG.44473.5	MYB_related
MSTRG.44473.8	MYB_related
MSTRG.44473.9	MYB_related
MSTRG.47004.3	MYB_related
MSTRG.47741.2	MYB_related
MSTRG.838.1	MYB_related
MSTRG.854.1	MYB_related
MSTRG.854.2	MYB_related
Os01t0127450-00	MYB_related
Os01t0187900-01	MYB_related
Os01t0192300-01	MYB_related
Os01t0524500-01	MYB_related
Os01t0524500-02	MYB_related
Os01t0589300-01	MYB_related
Os01t0603300-02	MYB_related
Os01t0708000-00	MYB_related
Os01t0975300-01	MYB_related
Os01t0975300-02	MYB_related
Os02t0551400-01	MYB_related
Os02t0641300-00	MYB_related
Os02t0680700-01	MYB_related
Os02t0685200-01	MYB_related
Os02t0706400-01	MYB_related
Os02t0776700-01	MYB_related
Os02t0776700-02	MYB_related
Os02t0776700-03	MYB_related
Os03t0750800-01	MYB_related
Os04t0583900-01	MYB_related
Os04t0676700-01	MYB_related
Os04t0676700-02	MYB_related
Os05t0114700-02	MYB_related
Os05t0126400-01	MYB_related
Os05t0195700-01	MYB_related
Os05t0195700-02	MYB_related
Os05t0579600-01	MYB_related
Os06t0105800-02	MYB_related
Os06t0728700-01	MYB_related
Os07t0432800-01	MYB_related
Os07t0484700-01	MYB_related
Os07t0695900-01	MYB_related
Os08t0144000-01	MYB_related
Os08t0151000-00	MYB_related
Os08t0159000-01	MYB_related
Os08t0510700-01	MYB_related
Os09t0491660-01	MYB_related
Os10t0561400-01	MYB_related
Os10t0561400-02	MYB_related
Os10t0561400-03	MYB_related
Os10t0562100-01	MYB_related
