# Supplementary material for: Transcriptional Landscape of Pathogen-responsive Lncrnas Reveals OS_LNC1812-Induced Disease Resistance by Abscisic Acid Pathway in Rice
Source: Research Square preprint supplement (doi:10.21203/rs.3.rs-244393/v1), 2021-03-01
Supplement: Supplementary file 7 [file 866b2b6754a214bdfdb1a98a.xlsx]

## Sheet: table3_1
TranscriptID	CK1	CK2	CK3	RBSDV1	RBSDV2	RBSDV3	RSV1	RSV2	RSV3	Description
ENSRNA049441495-T1	0	1.88435	0.325183	0	0.458057	0	0	0	0	-
ENSRNA049441592-T1	0	1.35466	1.17901	0	7.6088	2.09457	0	0	0	-
ENSRNA049441659-T1	0	1.5735	0.164382	0	7.12875	0.427503	0	0.408425	0.067421	-
ENSRNA049442327-T1	0	0.54346	0.344272	0.203944	7.97558	0.398695	0.257279	0	0	-
ENSRNA049442998-T1	0	2.91397	0.971508	0	10.305	1.14359	0	0.35243	0	-
ENSRNA049443084-T1	0	0.146186	0	0	2.22411	0	0	0	0	-
ENSRNA049443912-T1	0	3.75211	1.08469	0	6.96888	0.882769	0	0	0	-
ENSRNA049444387-T1	0	6.26001	4.36393	0	30.4352	2.98536	0	0	0	-
ENSRNA049444661-T1	0	2.54689	3.89232	0	25.987	2.68442	0.340403	0.136866	0.348556	-
ENSRNA049444971-T1	0	2.68872	1.52596	0	10.5315	1.81689	0.106846	0	0	-
ENSRNA049445795-T1	0	0.718026	1.79149	0	15.3617	0.305124	0	0	0	-
ENSRNA049445998-T1	0.428318	1.0757	0.831216	0.947353	0.444585	1.39466	1.2094	0.744279	0.979287	-
ENSRNA049446030-T1	0	4.30537	2.37596	0	17.576	0.156773	0	0	0	-
ENSRNA049446293-T1	0	1.33841	0	0	0.136568	0	0	0	0	-
ENSRNA049446499-T1	0	4.71028	5.61034	0	20.3554	1.42484	0.149585	0.483881	0	-
ENSRNA049446637-T1	0	1.84918	0	0	0	0	0	0	0	-
ENSRNA049446715-T1	0	2.55338	0	0	0.370685	0	0	0	0	-
ENSRNA049446912-T1	0	0.1137	0.251523	0	2.09144	0	0.278512	0	0	-
ENSRNA049446925-T1	0	0.494333	0	0	1.70103	0	0	0	0	-
ENSRNA049447110-T1	0.05739	0.047429	0	0.002433	0	0	0	0.001069	0.071258	-
ENSRNA049447124-T1	3.1668	2.75122	2.36235	1.05617	2.26334	2.27936	3.01612	2.33747	3.3952	-
ENSRNA049447149-T1	0.079108	0.071803	0	0	0.088618	0.352316	0.074046	0.177622	0.099783	-
ENSRNA049447338-T1	0	4.09646	0.45903	0	6.78939	0.593863	0.083553	0	0	-
ENSRNA049447358-T1	0.333431	0.119891	0	0.219075	0.320447	0.408459	0.27234	0.517601	0.099783	-
ENSRNA049447404-T1	1.12523	1.24745	0.968364	0.768913	1.06133	1.13556	1.55348	0.694596	2.14601	-
ENSRNA049447588-T1	0	1.05579	1.09098	0	8.73256	0.337057	0	0	0	-
ENSRNA049448021-T1	0	1.49018	0.84052	0	4.89236	0.134584	0	0.499561	0	-
ENSRNA049448338-T1	0	5.60178	1.23752	0	17.233	0.756047	0.106846	0.094512	0	-
ENSRNA049448453-T1	0	2.23502	7.77835	0	25.6202	3.16593	0.173296	0.431128	0	-
ENSRNA049448834-T1	1.55928	3.85033	6.02476	2.68088	4.16582	2.08298	2.57279	2.39026	1.64572	-
ENSRNA049448855-T1	2.18364	1.67979	2.25052	0.592096	1.37674	1.12285	1.01657	0.874233	2.49457	-
ENSRNA049449056-T1	0	4.95372	5.53953	0	19.7315	2.71583	0	0.166521	0	-
ENSRNA049449179-T1	0	0.958331	0.49047	0	4.22191	0.35712	0	0	0	-
ENSRNA049449240-T1	0	1.32407	0.535535	0	5.49904	0	0	0	0	-
ENSRNA049449267-T1	0	0	0	0	0.02937	0	0	0	0	-
ENSRNA049449763-T1	0	3.40978	0.890145	0	7.94479	0.372086	0	0.084385	0	-
ENSRNA049449930-T1	0	2.15737	1.18583	0	9.11099	0.170869	0	0	0	-
ENSRNA049450054-T1	0	0.406955	0	0	0	0	0	0	0	-
ENSRNA049450128-T1	0	4.96084	3.73737	0	12.1096	0.752089	0	0	0	-
ENSRNA049450219-T1	0	0.301556	0.844388	0	2.41237	1.29463	0	0	0	-
ENSRNA049450267-T1	0	0.500281	0	0	1.0028	0	0	0	0	-
ENSRNA049450281-T1	0	0	0	0	0.186378	0	0	0	0	-
ENSRNA049450896-T1	0	0.421593	0	0	0	0	0	0	0	-
ENSRNA049450913-T1	0	0.260202	0.124321	0	2.97897	0.012205	0	0	0	-
ENSRNA049450965-T1	0	0	0	0	0	0.075942	0	0.074009	0	-
ENSRNA049451109-T1	0	0.036259	0.150914	0	0.035118	0.036085	0	0	0	-
ENSRNA049464427-T1	0.604215	0.431819	0.342559	2.2482	4.50433	2.35865	1.26944	2.51831	0.917778	-
ENSRNA049464535-T1	0.517251	3.99839	4.97727	0.253362	18.3789	3.88628	0.157607	0.348531	0.65845	-
ENSRNA049464815-T1	0	0.030312	0	0	0	0	0	0	0	-
ENSRNA049464904-T1	1.03797	0.170609	1.82456	4.53571	6.19071	4.50126	1.49682	2.33428	0.870407	-
ENSRNA049464961-T1	0	3.12406	0.523521	0.274028	12.3989	0.300181	0.04294	0.604841	0.3546	-
ENSRNA049464972-T1	0.6947	6.66591	2.31551	2.99613	16.4826	0.590562	1.22771	1.62357	2.41175	-
ENSRNA049464985-T1	0.127646	7.00768	0.936267	0.530215	5.33043	1.57935	1.50851	0.230532	0.295311	-
ENSRNA049465003-T1	0	1.38476	0.526655	0	15.089	1.91966	0	0	0	-
ENSRNA049465030-T1	2.34288	1.49029	1.07068	2.47418	7.2454	6.03829	2.20285	1.22228	2.89471	-
ENSRNA049465109-T1	0.613239	2.96922	0.901609	1.69915	3.84653	5.11751	0.527713	1.0123	0.641236	-
ENSRNA049465125-T1	1.38364	2.26529	3.57838	3.63863	3.73434	6.10932	2.06291	2.50102	2.68659	-
ENSRNA049465332-T1	1.37531	0.997157	1.68127	3.29861	1.38303	1.36578	2.63464	1.92903	2.25713	-
ENSRNA049465347-T1	3.19462	5.05816	6.89944	6.71812	3.08811	4.32948	5.69719	7.85895	5.30248	-
ENSRNA049465362-T1	3.69607	3.14438	1.33175	3.13153	3.49547	2.52055	2.69411	2.80309	4.77664	-
ENSRNA049465381-T1	5.59138	3.86427	2.63648	5.32279	3.0018	1.0515	3.8143	3.13507	3.01267	-
ENSRNA049465412-T1	3.87878	7.34205	6.30095	7.12409	3.81309	2.57378	5.18073	6.29448	4.66983	-
ENSRNA049465423-T1	4.36833	7.09541	5.69503	7.47777	6.97294	4.46018	5.67772	4.20631	6.33288	-
ENSRNA049465477-T1	0	2.46374	0	0	0.370309	0.253156	0	0	0	-
ENSRNA049465662-T1	1.25668	7.46473	0.948202	1.02146	1.06854	2.0768	2.25106	2.03138	1.27506	-
ENSRNA049465699-T1	1.37244	1.22161	0.723717	1.57298	2.59539	2.22314	2.16692	2.13855	1.50063	-
ENSRNA049465704-T1	13.6214	5.77374	5.10169	7.94931	12.4435	11.4542	15.3793	8.67961	8.23472	-
ENSRNA049465759-T1	0.041292	0	0	0.118004	0.193393	0.136488	0.024176	0.053024	0	-
ENSRNA049465776-T1	0.151541	0.322852	0.383632	1.31507	1.40973	4.13178	0.239101	0.333625	0.682505	-
ENSRNA049466017-T1	0	3.75481	2.42083	0.662583	19.4574	3.83584	0	0.145705	0	-
ENSRNA049466028-T1	0	1.62288	1.49599	0	7.10046	0.303506	0	0	0	-
ENSRNA049466151-T1	0	0.211738	0	0	0	0	0	0	0	-
ENSRNA049466168-T1	1.18453	4.00233	3.42579	0.908527	17.9614	1.57984	0.227756	0.197089	0.212652	-
ENSRNA049466206-T1	2.00979	0.870223	0.812283	1.04415	0.123845	1.20479	1.69526	0.338833	1.39479	-
ENSRNA049466221-T1	0	0	0	0	0	0	0	0	0	-
ENSRNA049466264-T1	0.252446	5.41611	1.04392	0	18.4389	0.614185	0.225904	0.197407	0	-
ENSRNA049466282-T1	0	1.44726	0	0	0	0	0	0	0.037302	-
ENSRNA049466327-T1	27.4258	13.7754	6.26079	3.06735	2.89366	3.59713	13.8934	5.37748	9.37595	-
ENSRNA049466486-T1	2.04457	9.1256	1.40876	1.53319	1.55885	2.84815	3.28032	2.68248	1.85735	-
ENSRNA049466562-T1	5.55512	2.70172	1.80095	3.70703	5.43265	4.08514	5.94347	4.10538	2.92129	-
ENSRNA049466596-T1	95.3294	53.8597	37.822	77.2874	107.404	86.9988	124.965	77.1658	69.4529	-
ENSRNA049466653-T1	0.224231	0.325595	0.345306	1.74364	1.27781	2.28437	0.784711	0.472614	0.418852	-
ENSRNA049466678-T1	8.80814	6.10683	3.97092	8.28598	10.0594	16.0824	10.1045	6.02022	8.31956	-
ENSRNA049466696-T1	1.92048	0.885138	1.44755	8.34211	23.1018	42.7742	3.22389	3.42331	2.05014	-
ENSRNA049466702-T1	0.457099	0.252748	0.295551	1.42477	4.40056	9.9726	0.879836	0.807624	0.491912	-
ENSRNA049466739-T1	97.8929	109.075	128.169	185.521	202.325	208.121	141.442	159.176	158.8	-
ENSRNA049466845-T1	24.5499	11.9655	5.32315	2.44083	2.43776	3.0845	12.095	5.0443	8.05257	-
ENSRNA049467441-T1	0.76941	0.240757	0.341854	1.55087	2.77012	4.98119	0.665098	0.339191	0.921574	-
ENSRNA049467602-T1	3.55398	9.4994	10.3773	14.843	9.22889	8.49465	5.74119	6.79404	7.93629	-
ENSRNA049467656-T1	0.104427	0.436913	0.799733	0.101571	0.099003	0.129288	2.31616	0.298343	0.190082	-
ENSRNA049467705-T1	0.818762	1.87446	0.864343	4.22026	3.0363	3.25327	1.85289	2.12314	1.00314	-
ENSRNA049467714-T1	0.139432	0.141836	5.71056	0.17223	0.162729	7.40637	0.135241	0.136693	6.68841	-
ENSRNA049467750-T1	1.01513	2.86431	1.83612	3.24365	4.08439	1.8594	1.99778	4.04862	2.51192	-
ENSRNA049467856-T1	1.28608	6.95113	0.681506	0.938037	1.22691	1.85144	2.04147	1.62108	1.1806	-
ENSRNA049467868-T1	0.040348	0.003848	0.028545	0.000215	0	0.402702	0.011638	0.02099	0	-
ENSRNA049467878-T1	1.055	0.608467	0.940205	4.88801	14.299	25.8687	1.81615	1.96713	1.37376	-
ENSRNA049467888-T1	99.5658	110.374	130.027	189.885	205.732	211.559	144.69	165.461	160.754	-
ENSRNA049467928-T1	1.91907	0.180133	0.936134	2.38252	1.7369	32.2829	0.186576	0.958371	1.26677	-
ENSRNA049468027-T1	2.95133	3.65392	3.54238	10.9039	4.70739	3.46492	4.53294	5.9553	5.57339	-
ENSRNA049468042-T1	1.34941	1.33254	0.900572	0.187215	0.604951	1.09077	1.52969	1.22749	0.658091	-
ENSRNA049468053-T1	3.25039	3.31704	1.17082	4.56288	4.56108	3.30368	3.0254	3.72774	2.21985	-
ENSRNA049468126-T1	3.20908	3.89923	2.22232	2.65988	3.82894	0.557672	0.897099	1.22729	3.75624	-
ENSRNA049468167-T1	0.567365	0.31253	0	0	0.332002	1.4064	0	0	0	-
ENSRNA049468174-T1	9.9633	9.45015	10.8569	9.86515	10.1586	8.12192	11.2596	9.34501	12.2418	-
ENSRNA049468369-T1	0.329112	0.062973	0	0	0.006098	0.04923	0.053534	0.02099	0	-
ENSRNA049468376-T1	11.4831	6.41465	5.24416	9.33127	12.9577	12.7092	15.0545	11.3419	8.07225	-
ENSRNA049468389-T1	0.271939	0.239069	0.345409	0.946873	0.912136	1.44942	0.500194	0.403531	0.473294	-
ENSRNA049468427-T1	0	1.13549	0.018432	0	0.820732	0	0	0	0	-
ENSRNA049468596-T1	0	0.682251	0	0	0.964081	0	0	0	0	-
ENSRNA049468891-T1	0.633634	1.37824	0.431578	0.555873	0.352981	0.717938	0.257796	0.8997	0.51799	-
ENSRNA049468908-T1	0.355781	0.363992	0.752595	4.08133	1.41759	2.27864	0.588401	0.845188	0.232053	-
ENSRNA049468923-T1	6.47071	0.046935	0.139188	0.127064	0.126502	0.165767	1.33586	3.04387	0.087375	-
ENSRNA049468966-T1	0	0	0.090236	0.404852	5.05656	6.66953	0	0	0.637501	-
ENSRNA049468980-T1	3.84482	0.872148	0.926118	9.35808	6.06395	2.38855	2.47858	1.72961	0.749483	-
ENSRNA049468993-T1	3.10031	0.018795	1.49241	0.55755	0.659906	0	0.232494	0.014323	0	-
ENSRNA049469003-T1	0	0.374844	0	0	0.067382	0.384259	0	0	0	-
ENSRNA049469014-T1	0	1.83612	0	0	0	0	0	0	0	-
ENSRNA049469147-T1	0	0.060813	0	0	0.000123	0	0	0	0	-
ENSRNA049469155-T1	13.7554	6.86985	5.96948	10.8335	16.7574	11.7419	17.5216	10.726	7.56114	-
ENSRNA049469163-T1	4.72236	2.66373	1.95811	4.00449	4.61791	7.69347	4.64293	2.9918	3.68134	-
ENSRNA049469166-T1	1.0612	0.608467	1.06896	5.20597	15.2239	26.6131	1.78761	2.00131	1.48011	-
ENSRNA049469217-T1	1.00499	0.490495	1.55956	2.08594	1.53213	3.5787	0	0.294772	0.61512	-
ENSRNA049469263-T1	24.6238	12.5841	5.68755	2.59481	2.70722	3.54095	12.4697	5.17465	8.09935	-
ENSRNA049469734-T1	0	5.01672	3.10262	0	29.8307	2.828	0	0.12489	0.43088	-
ENSRNA049469812-T1	2.19577	1.54139	0.785656	0.122065	0.091116	0.140755	0.279919	0.131369	0.203299	-
ENSRNA049470054-T1	0.410566	0.20737	0.298472	0.406767	1.50085	1.659	0.389	0.539885	0.302033	-
ENSRNA049470113-T1	2.05588	1.11144	1.63426	2.83065	1.79485	2.51981	1.23022	1.80564	1.01286	-
ENSRNA049470161-T1	0	0	0.125929	0.347922	0.461293	0.7647	0	0	0	-
ENSRNA049470317-T1	0	0	0.31683	0.347534	0	0	0.216082	0.013349	0	-
ENSRNA049470335-T1	0.076055	1.19401	0.151604	0.177269	0.108331	0.07825	0.125338	0.122043	3.33571	-
ENSRNA049470347-T1	0.082993	1.64627	0.018257	0.129185	0.431579	0.039389	0.052198	0.062682	0.106145	-
ENSRNA049470425-T1	0.333638	0.661045	0.321321	0.503607	2.43184	0.842142	0.265059	0.259147	0.604933	-
ENSRNA049470525-T1	0	0.110057	0	0	0.037869	0	0	0	0	-
ENSRNA049470757-T1	6.31086	6.09307	7.69334	7.53461	3.14466	5.74902	8.94579	6.53426	6.92492	-
ENSRNA049470920-T1	1.70304	3.33689	3.95339	4.2586	6.03504	7.49118	5.18295	3.72457	4.80162	-
ENSRNA049470941-T1	77.3452	60.5464	81.8026	182.756	157.721	140.078	91.4156	96.718	105.114	-
ENSRNA049471001-T1	0.728939	0.488107	0.334245	0	0.110618	0.221822	0	0.341933	0.300317	-
ENSRNA049471020-T1	0.158952	0.155755	61.9411	0.162969	96.1964	91.7353	57.1499	74.7347	62.0567	-
ENSRNA049471075-T1	0	0	0	0	0.263154	1.45419	0	0	0.253256	-
ENSRNA049471225-T1	0.269454	0.230014	0.15153	0.164409	0.155924	0.101134	0.150282	1.8308	0.21729	-
ENSRNA049471251-T1	3.85594	3.08542	4.97119	19.8163	12.5937	12.1592	5.1309	10.4695	9.79251	-
ENSRNA049471273-T1	1.50397	0.84424	0.76369	4.27493	2.63194	0.620988	2.29744	1.27388	1.73872	-
ENSRNA049471283-T1	0.162125	0.179121	0.173357	0.140623	0.240601	0.170822	0.169284	0.054739	2.75291	-
ENSRNA049471325-T1	2.16373	1.52528	2.06563	7.75645	6.48016	4.83649	5.63476	4.78557	3.65398	-
ENSRNA049471342-T1	2.05385	1.55268	2.3024	1.97199	2.36269	0.604338	0.672956	1.20421	1.91951	-
ENSRNA049471366-T1	0	0.420622	0.634186	1.14306	1.60861	0.625921	0	0.45092	0.290158	-
ENSRNA049471381-T1	0.584691	0.102347	0.25005	1.31009	3.39562	2.49598	0.030913	0.821647	0.593445	-
ENSRNA049471535-T1	0.678629	0.865584	0.529797	1.26511	0	1.79169	0.3718	0.208151	0.415762	-
ENSRNA049471546-T1	0	0	0	0	0	1.51115	0.137637	0	0.39814	-
ENSRNA049471578-T1	0	0	0	0	0	0	0.256875	0	0	-
ENSRNA049471602-T1	0.786775	0.23379	0.211652	2.9433	1.38107	2.61255	0.888667	2.64445	2.7103	-
ENSRNA049471650-T1	1.75101	0.083989	0.404332	0.060972	0.008901	0.049964	0.098539	0.849231	0.005197	-
ENSRNA049471695-T1	0.335855	0.167867	0.128941	0.556171	1.50422	1.7608	0.654021	1.45378	0.770794	-
ENSRNA049471700-T1	1.37175	7.77302	0.948202	1.02146	1.16918	2.1012	2.34945	2.12797	1.30721	-
ENSRNA049471715-T1	48.0053	27.6889	21.3333	38.9092	50.9671	48.9055	57.6165	39.1727	35.4654	-
ENSRNA049471723-T1	0.78702	0.499671	0.724381	3.79845	10.608	19.0442	1.25931	1.39702	0.823645	-
ENSRNA049471772-T1	5.24383	10.0072	8.01575	8.38489	9.32242	11.6602	5.06826	7.74531	5.70078	-
ENSRNA049471778-T1	11.2561	18.5232	17.0823	17.8369	19.0082	23.7317	11.6393	16.1728	13.1755	-
ENSRNA049471835-T1	0	0	0	0.14912	0.938078	0.043395	0	0	0	-
ENSRNA049471864-T1	27.821	13.662	6.34179	3.04284	2.78566	3.44571	13.9383	5.71364	8.84229	-
ENSRNA049471882-T1	10.311	41.2419	15.6254	30.831	51.0572	83.9467	16.5937	20.574	16.9629	-
ENSRNA049471985-T1	1.47412	2.67351	0.669217	0.66564	0.626653	1.00209	1.10812	0.17879	1.91951	-
ENSRNA049472003-T1	0.687446	1.46279	1.22938	1.69304	1.5201	2.56956	1.71553	1.33793	1.1065	-
ENSRNA049472044-T1	0.266584	0.965524	1.09605	1.11169	0.313908	1.09396	0.047007	0.280366	0.394549	-
ENSRNA049472073-T1	0.516357	0.208108	0.711725	1.51528	0.938816	1.54231	0.285838	0.354281	0.355962	-
ENSRNA049472108-T1	1.86287	2.48499	2.12668	2.09375	1.99389	2.19066	2.18934	2.2746	1.91339	-
ENSRNA049472120-T1	4.66849	3.41212	4.6524	5.33583	4.93615	4.07329	2.64706	3.32062	2.97294	-
ENSRNA049472132-T1	2.10426	2.44204	3.32796	5.96889	2.23126	3.43133	2.84262	1.28161	3.47161	-
ENSRNA049472178-T1	0.268369	0.325229	0.356294	0.884196	0.914208	0.401717	0.354992	1.03956	0.591569	-
ENSRNA049472195-T1	0.283307	0.080356	0.499407	1.81357	0.305942	0.179006	0.422524	0.624452	0.397283	-
ENSRNA049472208-T1	0.464188	0.118573	0.561036	1.02411	0.862439	0.163867	0.119227	0.094824	0.905436	-
ENSRNA049472337-T1	0.027929	0.031967	0.022708	0.137091	1.06498	0.058336	0.056313	0.043442	0.030026	-
ENSRNA049472354-T1	1.54418	2.36661	0.965039	0.934561	2.03345	1.19094	1.48221	1.49301	1.0528	-
ENSRNA049472429-T1	0.071848	0.143536	0.383632	0.988488	2.23276	3.9437	0.063213	0.215308	0.318167	-
ENSRNA049472455-T1	0.081016	0.137206	0.106062	0.13283	0.157076	0.136436	0.10816	0.097335	2.32707	-
ENSRNA049472570-T1	10.6487	4.8716	1.96597	1.06723	1.21949	1.30461	5.67502	2.18233	2.90904	-
ENSRNA049472690-T1	0.611241	1.76267	1.58948	3.86364	1.98539	2.54009	0.920474	1.00285	0.968042	-
ENSRNA049472745-T1	0	7.61971	5.56627	0	39.7767	0.698078	0	0	0	-
ENSRNA049472760-T1	0.720276	0.959364	1.80482	5.98555	1.13289	2.27012	1.71482	1.67467	2.73836	-
ENSRNA049472768-T1	4.96338	0.233125	31.7699	18.2624	0.3024	0.213383	0.204211	0.167543	20.6044	-
ENSRNA049472788-T1	5.51682	1.04908	1.36755	0.989826	0.173239	1.38028	2.32858	0.419332	1.74218	-
ENSRNA049472807-T1	0	0.115298	0	0	0	0	0	0	0	-
ENSRNA049472915-T1	9.25091	7.24453	8.56762	18.6958	16.1978	13.6207	5.71647	9.86634	9.98436	-
ENSRNA049472923-T1	2.66514	6.8877	1.33996	9.81137	6.17018	3.14026	1.63116	4.58421	4.9231	-
ENSRNA049472947-T1	0.569975	2.32289	0.132731	1.28406	0.054909	0.201161	0.231347	0.571787	0.74236	-
ENSRNA049472954-T1	1.42068	1.74002	1.68403	4.73676	4.16968	1.39048	3.11911	1.51072	2.16697	-
ENSRNA049472998-T1	0.90582	1.69551	0.305223	0.616684	1.00654	0.470121	0.264182	0.499388	1.09467	-
ENSRNA049473016-T1	0.195753	1.14264	0.154503	0.395308	0.337816	0.010002	0.076036	0.026653	0.479596	-
ENSRNA049473038-T1	1.0615	1.80906	0.555298	0.894393	1.11079	1.77602	0.137582	0.016956	0.875957	-
ENSRNA049473057-T1	0.124502	2.16246	0.148461	0.103909	0.178405	0.160246	0.104585	0.06947	0.144635	-
ENSRNA049473071-T1	0.537364	2.62427	0.368343	0.873991	0.212068	0.993066	0.079563	0.328218	0.144959	-
ENSRNA049473128-T1	1.59166	1.7172	0.904906	1.09153	0.534704	0.233029	0.72461	0.019719	0.858657	-
ENSRNA049473172-T1	0.724632	1.8045	0.636066	0.568607	0.227481	0.161791	0.072245	0.167579	0.298936	-
ENSRNA049473180-T1	0.102133	0.217982	0.20835	1.39136	0.765657	1.26732	0.081006	0.110534	1.32276	-
ENSRNA049473196-T1	3.99305	4.22502	11.0774	10.1514	11.3904	7.8583	4.54924	5.83109	7.05074	-
ENSRNA049473206-T1	5.53376	6.59046	4.78245	11.8502	10.0722	6.3216	2.61628	6.06154	6.50618	-
ENSRNA049473214-T1	0.971277	1.23404	0.710295	0.280291	0.263656	0.071011	0.383974	0.377768	0.26595	-
ENSRNA049473223-T1	0.89574	1.71699	0.2739	0.413391	1.43833	0.058584	0.29566	0.20643	0.719095	-
ENSRNA049473235-T1	0.570382	2.13415	1.0466	0.427092	0.594794	0.773532	0.3373	0.121794	0.83867	-
ENSRNA049473244-T1	4.32195	2.81133	5.25848	6.05466	2.81167	2.09295	1.91107	2.38097	4.33532	-
ENSRNA049473255-T1	0.114873	0.161965	0.312805	0.162826	1.94178	0.414871	0.035862	0.20208	0.150672	-
ENSRNA049473373-T1	0	0.484257	0.331736	0	3.54018	0	0	0	0	-
ENSRNA049473384-T1	0	0.118338	0	0	1.73939	0	0	0	0	-
ENSRNA049473392-T1	0.180112	0.145354	0.085544	0.15517	0.147537	0.024831	0.14057	2.36344	0.168921	-
ENSRNA049473610-T1	0.900871	1.1612	1.82293	2.578	1.1099	0.498298	0.521916	0.999123	0.725432	-
ENSRNA049473620-T1	0.751556	0.781641	1.61964	0.624392	0.246	0.682368	0.426137	0.425763	0.711519	-
ENSRNA049473627-T1	0.885285	1.7247	0.534665	3.18386	1.74466	2.08039	1.09358	1.35109	0.856091	-
ENSRNA049473635-T1	0.353044	0.361457	0	0.712425	0	3.34494	0.324281	0.562007	0.376197	-
ENSRNA049473675-T1	5.66679	8.17063	7.73973	5.29223	1.56515	3.60288	6.4467	7.16296	3.71527	-
ENSRNA049473801-T1	0	0	0.332602	0.604138	0.610721	2.42775	0	0	0.687063	-
ENSRNA049473842-T1	0.441636	1.6467	0.771066	1.03251	0.656097	1.28723	1.01022	0.513594	0.441719	-
ENSRNA049473866-T1	0.44398	1.52528	1.77613	2.79092	1.6864	2.6396	0.495448	1.10131	3.14656	-
ENSRNA049473876-T1	1.11302	0.820038	0.429	1.32585	0.913092	0	0.871947	1.11117	0	-
ENSRNA049473879-T1	1.07848	1.43227	1.13167	2.42466	3.72833	1.17457	2.36864	1.70148	1.66716	-
ENSRNA049473887-T1	0.492341	2.32064	2.72373	1.67237	3.15652	0.430411	1.62512	1.20303	2.10511	-
ENSRNA049473893-T1	0.489939	2.24805	2.21084	3.01848	11.8297	1.98766	1.65509	1.66436	2.91966	-
ENSRNA049473899-T1	0.185286	0.004415	0.12559	0.695397	0.066665	0.009349	0	0.291446	0.020235	-
ENSRNA049473908-T1	0.043262	0.184579	1.18143	0.123156	0.150601	0.202439	0.611908	2.02526	0.100337	-
ENSRNA049473918-T1	0.285067	0	0	1.20773	0.336149	2.63809	0.701565	0.428196	0.918807	-
ENSRNA049473927-T1	0.292376	0.427158	0.276558	1.16507	0.176921	1.99949	0.698759	0.310287	1.22404	-
ENSRNA049474042-T1	67.9708	81.6724	103.48	151.141	147.505	172.096	106.35	117.468	125.677	-
ENSRNA049474102-T1	17.7206	6.85251	6.13522	18.431	6.43855	1.25232	15.9817	10.1761	11.6075	-
ENSRNA049474115-T1	0.203485	0.177394	0.263263	0.248344	0.218226	3.969	0.194626	0.215345	0.178088	-
ENSRNA049475715-T1	12.2019	13.8716	16.4939	14.8945	12.6597	15.9008	13.5208	12.8344	15.8051	-
ENSRNA049475720-T1	4.73401	1.24508	1.4206	1.63313	2.12917	1.70842	1.84699	0.814628	9.14447	-
ENSRNA049475834-T1	0.281064	0.409825	0.233972	0.899066	3.73337	5.67921	0.934321	0.480161	0.515867	-
ENSRNA049475843-T1	9.64396	5.3494	0.118947	11.1835	3.58519	0.114547	2.1058	1.76527	0.089124	-
ENSRNA049475930-T1	1.23155	1.02028	0.821983	1.63859	3.29887	1.22958	0.651444	0.450186	1.28789	-
ENSRNA049475950-T1	1.84315	0.482304	1.57094	3.41975	2.99084	5.29827	3.36566	2.54	1.06019	-
ENSRNA049475971-T1	0	0	0	0	0	0.915679	0	0	0	-
ENSRNA049476201-T1	0.742135	0.953926	1.51976	3.55044	5.42922	12.1509	0.610551	0.537816	1.34842	-
ENSRNA049476209-T1	0.51822	3.45085	3.48492	0.531027	17.8467	4.46997	0.08712	0.907275	0.241626	-
ENSRNA049476307-T1	1.09928	3.13591	3.82345	3.42162	3.8638	3.03946	0.784019	1.77197	2.92892	-
ENSRNA049476316-T1	0.573683	0.777032	1.84833	1.11112	2.09692	0.810201	1.8601	0.837031	1.75151	-
ENSRNA049476319-T1	0.591209	1.17162	2.15307	1.48588	2.37029	1.03568	2.09499	1.50166	1.60959	-
ENSRNA049476335-T1	0.762477	0.202562	1.27907	1.71214	1.92862	2.66678	1.33895	0.228966	0.964047	-
ENSRNA049476340-T1	0	0	0	0	3.73087	0	0	0	0	-
ENSRNA049476352-T1	0.324966	0.064487	0.413429	0.914113	3.8141	5.91203	0.154566	0.528191	0.650339	-
ENSRNA049476364-T1	0.998467	2.36383	0.938986	2.9389	2.46807	3.83175	3.15411	1.56644	1.87766	-
ENSRNA049476404-T1	2.30867	2.34215	1.80517	2.77553	2.28834	5.94066	0.647253	0.816699	2.32359	-
ENSRNA049476411-T1	0.56644	0.268672	0.642535	1.27818	0.748185	2.16084	0.161298	1.2156	0.358813	-
ENSRNA049476493-T1	0.12281	0.148976	0.344566	0.436025	0.577686	1.18407	0.154657	0.147866	0.132355	-
ENSRNA049476535-T1	0.403861	0.678023	0.812169	0.637848	1.9652	1.91107	0.213068	1.711	0.450723	-
ENSRNA049911413-T1	0	2.82973	1.27474	0	9.53836	0.28896	0	0	0	-
ENSRNA049911424-T1	0	0.378152	0	0	5.6545	0.451253	0	0	0	-
MSTRG.1.2	8.58519	7.34707	0.526099	0.928663	5.2917	16.9918	8.54193	7.53005	8.35	-
MSTRG.10000.1	0.845429	0.590695	1.40176	1.44864	1.50506	0.67203	0.435368	0.613843	0.857513	-
MSTRG.10002.2	0.689928	0.711782	0.423802	1.33834	5.02151	2.64396	0.52408	1.09058	1.00292	-
MSTRG.1001.1	0	3.77404	3.80066	0.058769	23.0157	2.46001	0.166485	0.247921	0.246981	-
MSTRG.10013.1	1.65857	2.91744	3.66047	2.34521	2.96352	4.80921	2.30137	3.30443	5.09216	-
MSTRG.10015.2	0.831627	0.54495	1.02918	3.47467	1.42342	1.05765	1.78193	0.944644	1.76291	-
MSTRG.10017.2	36.5769	6.05327	24.4287	11.2833	1.12263	19.4749	37.5449	31.5406	27.8727	-
MSTRG.10017.3	2.49956	20.3537	3.13794	3.23303	13.9569	2.86672	6.01026	3.87441	4.74916	-
MSTRG.10018.3	0.228116	0.140383	0.466754	0.159943	0.338994	4.28542	0.365473	0.372013	0.208987	-
MSTRG.10018.4	52.8338	31.2012	40.0092	26.1262	26.6614	22.983	56.9414	48.0717	43.5247	-
MSTRG.10018.5	4.37122	6.79138	0.23851	0.069636	0.308603	4.92702	8.55761	5.325	5.00619	-
MSTRG.10021.1	2.15974	1.57997	3.49378	2.1278	2.19923	3.30636	1.93551	1.68723	4.12152	-
MSTRG.10026.1	10.8702	11.0518	11.6249	26.1784	25.1092	25.7024	14.2863	19.0139	19.0357	-
MSTRG.10033.5	0.061094	0.047474	0.699094	6.54948	8.40943	0.119408	0.333646	0.005097	0.013515	-
MSTRG.10043.1	1.41061	1.5703	0.351212	1.25163	0.831725	0.009122	1.38601	0.671151	1.93851	-
MSTRG.10048.1	32.2289	30.6893	32.658	44.83	23.8242	35.0078	30.4029	36.363	26.7491	-
MSTRG.1005.1	4.07009	3.79704	2.73281	3.81247	3.73392	6.6118	5.05081	3.91376	4.24715	-
MSTRG.10051.1	0.346122	2.5378	1.05697	0.784716	5.2195	1.08571	0.396847	0.606724	0.46207	-
MSTRG.10056.2	7.66822	13.2498	12.5441	16.2773	26.6035	15.0353	19.1196	17.7234	2.71436	-
MSTRG.10062.2	0.160179	2.63796	3.0946	4.02017	6.88259	1.46372	0.092716	3.17851	3.28495	-
MSTRG.10063.1	1.39721	1.38458	0.710673	2.6035	4.32825	1.32637	1.54958	5.45012	0.443862	-
MSTRG.10063.2	0.983662	1.39302	3.84884	9.22079	2.58058	1.64055	0.805786	1.74181	5.30352	-
MSTRG.10064.1	5.7447	44.6782	40.6871	51.7679	7.21913	15.5336	47.677	50.1936	49.6656	-
MSTRG.10064.2	14.7349	1.25151	0.852041	1.07927	2.45599	1.16356	1.02193	1.36038	9.00179	-
MSTRG.10064.3	38.6741	6.57795	4.66389	7.64818	33.414	29.3278	15.5302	12.3586	9.14055	-
MSTRG.10066.1	2.88981	1.25573	4.191	0.684046	2.7422	1.12104	0.79001	0.32485	3.94055	-
MSTRG.1007.2	5.52372	3.57533	1.37575	6.11966	0.400917	11.3327	3.85496	2.61881	3.08391	-
MSTRG.1007.3	2.77087	3.48999	3.90081	0.979028	3.80011	0.472553	5.44744	3.65727	3.71762	-
MSTRG.1007.4	15.8357	12.6016	10.6175	2.57572	9.99244	0.01654	12.5925	11.344	11.489	-
MSTRG.10070.1	0.045646	0.626281	1.77286	0.038755	5.81113	1.26069	0.13965	0.23767	0.108854	-
MSTRG.10073.1	0.271182	1.38961	0.543792	0.036356	0.132031	0.818372	0.014063	0.619576	0.057025	-
MSTRG.10073.2	0.100032	3.30168	3.97173	0.308459	0.080247	1.36946	0.073706	6.92484	0.072068	-
MSTRG.10073.3	0.206615	1.32782	1.77317	0.291692	0.10012	14.9461	0.105184	0.056916	0.146852	-
MSTRG.10076.2	48.1266	49.1372	43.3953	73.8982	64.4148	71.1827	63.6358	65.4512	60.1215	-
MSTRG.10077.1	0.252797	3.63958	1.42503	0.437712	8.93544	1.23612	0.491475	0.234054	0.332609	-
MSTRG.10082.1	0.763443	0.752304	0.902826	0.860313	0.852551	1.71181	0.659698	1.04156	0.938398	-
MSTRG.10083.1	0.26648	2.50443	0.943737	0.111664	5.48953	0.343596	0.117927	0.153151	0.207831	-
MSTRG.10085.10	1.09797	0.608951	0.7614	1.30702	0.234655	0.550293	0.002951	0.887945	1.46948	-
MSTRG.10085.3	0.729068	1.239	0.291681	1.25284	0.008778	0.577815	1.58579	1.32872	0.492476	-
MSTRG.10085.7	0.209688	0.25094	0.351658	1.6401	0.060447	3.02721	1.88095	2.30986	1.79119	-
MSTRG.1009.1	1.19945	0.395244	0.781197	0.212547	0.292146	0.524064	2.08121	1.43244	1.15038	-
MSTRG.10092.1	0.367426	0.378948	0.397032	0.370775	0.308465	5.03271	0.446668	0.306426	0.44891	-
MSTRG.10092.2	2.56769	4.45187	3.43576	5.24982	5.81694	2.65675	3.07526	3.48987	2.84904	-
MSTRG.10092.3	0.991741	1.33776	1.74361	2.44875	0.867383	0.681128	1.6744	2.5182	1.03077	-
MSTRG.10092.4	1.54136	1.93674	1.91524	2.02679	1.65967	1.95384	2.03063	2.20285	2.2646	-
MSTRG.10092.5	0.693268	0.641688	1.10249	0.885637	2.12019	0.528332	1.30923	0.66323	1.15899	-
MSTRG.10093.1	16.5392	2.54103	1.80014	2.43914	6.65948	2.66787	5.50556	3.5451	2.59227	-
MSTRG.10096.1	1.77765	3.30018	3.48348	5.60424	3.22252	4.6274	1.20015	0.87958	1.33779	-
MSTRG.10098.1	10.1617	8.35811	4.18985	6.73707	1.52434	4.47427	8.66753	6.70815	7.51044	-
MSTRG.10098.2	3.21731	3.33807	6.58318	1.96826	6.45338	2.22367	5.04847	7.6329	6.60403	-
MSTRG.1010.3	0.838102	2.11976	1.69886	1.8228	9.83532	4.21704	1.09327	2.73692	2.543	-
MSTRG.10106.1	1.75448	3.60725	3.8191	3.1394	2.80008	1.64099	3.23617	4.14113	2.91124	-
MSTRG.10119.1	2.1719	2.72611	3.29109	9.69919	7.16636	2.76325	3.82889	5.94202	4.72064	-
MSTRG.1012.1	11.653	13.3766	13.0278	15.2101	14.9441	20.2881	14.9676	16.6493	15.1523	-
MSTRG.10121.2	0.43576	0.803952	1.13846	1.43719	2.5216	2.6002	0.725194	0.732626	0.645902	-
MSTRG.10123.1	1.29919	1.30861	1.02633	0.51147	1.77311	0.538884	0.71226	1.60701	0.123119	-
MSTRG.10128.1	1.8325	2.63261	2.76982	6.8935	5.2256	6.84771	2.7927	5.74467	3.95394	-
MSTRG.10136.1	1.41802	1.13416	1.13311	2.82185	2.42951	0.998223	1.31984	1.3648	1.57842	-
MSTRG.1014.1	16.3867	21.1497	17.4059	24.7974	19.816	21.1476	15.7225	21.7528	20.5455	-
MSTRG.10146.1	0.519189	0.443548	0.543042	0.41506	0.17885	0.319613	1.33223	0.528356	0.389531	-
MSTRG.10149.1	1.27054	0.027799	0.428813	0.02915	0.544272	0.012778	0.133142	0.013059	4.80264	-
MSTRG.10149.3	0.384646	5.08398	4.96624	1.15971	16.1618	0.789892	0.424617	1.62064	0.349617	-
MSTRG.10150.10	0.000853	0.201419	0.380225	1.0755	0.001246	0.006168	0.000691	0.225941	0.001472	-
MSTRG.10150.13	0.938224	0.162781	0.360474	0.814082	0.601391	1.75036	1.07951	0.401542	0.214579	-
MSTRG.10150.15	4.51344	5.90742	0.541651	1.58493	6.48719	3.96159	3.80819	3.82098	1.73686	-
MSTRG.10150.16	1.84768	1.49842	0.313439	0.824528	2.66386	1.4912	1.22802	0.707328	1.18965	-
MSTRG.10150.2	0.393006	0.346335	3.15733	1.92406	0.051681	0.004945	0.160456	0.107601	0.001846	-
MSTRG.10150.5	0.114189	1.45439	0.039153	0.05283	0.034715	0.058267	0.922506	0.245878	0.145344	-
MSTRG.10150.6	3.11869	4.47799	4.94468	6.12153	7.27369	9.0122	3.37104	4.12149	5.55366	-
MSTRG.10150.8	0.485422	0.375514	2.36329	1.03293	0.044513	0.006119	0.260715	0.438821	0.00202	-
MSTRG.10151.1	0.495139	0.729119	1.51993	1.94	1.56963	1.37249	1.53556	1.13353	1.85091	-
MSTRG.10154.1	0	0.078352	0.100855	0.208668	1.69117	1.41588	0.049758	0.148548	0.054946	-
MSTRG.10163.2	1.49187	1.58753	1.97716	4.03783	4.03024	4.82786	1.31032	1.30408	2.17036	-
MSTRG.10164.1	1.25653	1.66883	1.41912	0.966616	1.27011	1.20421	0.880357	0.858212	0.80047	-
MSTRG.10175.1	0.761392	1.40171	1.57065	6.15197	9.02675	9.81251	0.552827	1.88109	2.29169	-
MSTRG.10177.2	0.073165	0.052297	0.002156	0.035598	13.2006	0.005541	0.028809	0.068766	0.496226	-
MSTRG.10177.5	0.730612	0.481664	8.95725	0.559693	0.205643	0.557242	0.390261	0.351198	4.47712	-
MSTRG.10179.1	0.499155	1.58125	1.33111	2.20004	2.30262	3.03174	1.35055	1.64569	1.72333	-
MSTRG.10197.1	0.846058	1.13712	1.07592	0.73672	0.672594	7.68882	0.911725	0.404682	1.35183	-
MSTRG.10197.2	0.304206	0.606421	0.169215	0.57212	0.501632	2.27009	0.207578	0.457623	0.200361	-
MSTRG.10197.3	3.83865	5.14102	5.85005	7.98325	7.5647	3.31988	6.33801	5.55174	5.07047	-
MSTRG.10198.1	3.44943	2.08712	2.26747	9.62314	5.39612	6.77662	4.40797	3.27572	4.85455	-
MSTRG.10200.1	2.55103	3.64235	2.18947	2.37477	2.30869	2.81343	3.17468	2.80324	2.37214	-
MSTRG.10206.1	0.823787	1.20354	0.911555	1.76048	2.86243	1.31658	2.66107	1.55081	1.41534	-
MSTRG.10215.1	0.047916	0.827746	2.23112	0.096432	6.59584	0.679581	0.160046	0.159334	0.240383	-
MSTRG.10224.1	1.36577	1.02034	0.698258	0.364577	0.583807	0.131877	1.17009	0.686825	0.097392	-
MSTRG.10231.1	26.5576	33.0187	33.4661	71.5755	58.7196	39.0979	27.2181	33.7678	34.5217	-
MSTRG.10232.1	4.15376	5.06757	4.15714	7.00999	6.08508	7.5443	6.11727	7.60958	7.28953	-
MSTRG.10232.3	0.163573	0.145121	0.280647	1.59245	0.476653	0.118392	0.20737	1.00035	2.05853	-
MSTRG.10232.5	2.18872	1.42924	2.09924	0.963075	0.494646	0.942495	2.81737	0.737659	1.38088	-
MSTRG.10242.1	2.90781	2.21113	2.53095	1.54181	3.60634	2.22316	3.4258	2.47997	1.89316	-
MSTRG.10243.2	0.230209	0.134132	0.129212	0.501238	0.612797	1.54618	0.440211	0.340276	0.672382	-
MSTRG.1025.1	0.118571	1.3733	0.228359	0.059657	5.15299	0.221349	0.113805	0.188751	0.062835	-
MSTRG.10250.1	5.75052	5.86625	4.5215	5.5622	5.61475	3.91058	7.35371	7.22837	6.64918	-
MSTRG.10251.1	5.31214	3.35493	4.53737	2.64148	4.63347	8.79062	4.55791	9.2995	6.61959	-
MSTRG.10251.4	2.42043	0.797213	1.3941	16.9228	2.18722	0.446183	0.383999	0.646408	1.60996	-
MSTRG.10252.1	55.0048	38.2143	9.91962	31.3571	9.66655	17.2966	15.3627	25.3047	13.4165	-
MSTRG.10252.3	10.8366	7.06219	3.43624	9.96304	5.07695	7.48093	14.702	10.9098	9.9797	-
MSTRG.10252.4	11.1062	9.46069	1.57764	13.9519	12.3974	19.9725	14.0054	26.236	13.4587	-
MSTRG.10257.1	0.221258	2.07552	0.663462	0.083492	2.84407	0.378626	0.338723	0.483418	0.267338	-
MSTRG.1026.1	4.6949	4.66704	7.19268	4.6218	5.52059	7.42808	4.90709	4.53891	6.20217	-
MSTRG.10260.2	14.2042	11.5068	9.0114	13.9106	8.07506	1.8491	8.9508	15.8259	5.16176	-
MSTRG.10260.4	3.33656	4.38109	8.59654	9.2048	8.45349	0.720394	4.47904	5.74299	12.9783	-
MSTRG.10260.5	2.32774	3.28575	0.881297	1.94537	2.16163	8.18949	4.42704	1.62362	3.96428	-
MSTRG.10261.1	1.79159	2.58154	3.5677	7.35758	0.059341	4.19831	1.67711	2.30303	4.09448	-
MSTRG.10264.1	6.68378	3.63842	3.96559	5.87504	4.74534	6.13318	6.90373	5.08848	5.85748	-
MSTRG.10267.1	1.86354	0.404016	0.180165	0.539358	1.55067	4.60294	2.45696	5.53619	0.163869	-
MSTRG.10267.2	0.120506	1.2958	5.13512	16.6453	38.3313	36.0643	0.179056	0.087153	4.17816	-
MSTRG.1027.1	4.33535	2.56532	3.90892	3.80494	2.00417	0.652862	7.2252	4.16142	5.59023	-
MSTRG.10278.2	35.3136	46.2611	43.2466	71.1659	146.268	88.0268	63.38	56.7402	59.6982	-
MSTRG.10280.1	0.123637	0.118003	0.559876	0.340941	0.911862	10.1519	0.319713	7.76976	5.11726	-
MSTRG.10291.1	87.2701	108.702	94.0299	72.117	73.4608	95.6889	105.16	106.296	99.7969	-
MSTRG.10293.1	0.399822	0.794085	1.11821	0.482567	3.3022	1.70594	0.736432	0.147777	0.15514	-
MSTRG.10293.12	0.049279	0.008219	0.010373	1.08417	1.28064	1.69148	1.0432	1.02025	0.906664	-
MSTRG.10293.13	1.14338	1.14913	1.14533	1.84075	1.84101	2.63985	1.26813	1.07594	1.18308	-
MSTRG.10293.2	0.862043	0.854126	0.917586	1.19677	0.792094	1.47194	1.09964	0.909062	1.15402	-
MSTRG.10293.4	0.60153	0.96607	0.770744	0.970309	0.984589	1.26676	0.967944	0.383241	0.900908	-
MSTRG.10293.6	0.963329	0.990459	0.54251	0.847109	0.745654	1.56476	0.712168	0.871337	1.21851	-
MSTRG.10293.8	0.819589	0.812451	1.38736	2.36517	2.40139	2.93681	0.931	0.622459	0.884647	-
MSTRG.10299.2	2.31226	1.6568	0.517064	2.0498	3.07531	5.07915	1.13376	2.57782	1.04199	-
MSTRG.10299.5	3.08315	6.02505	1.84672	0.373692	10.3385	0.971304	6.72858	1.92694	1.05138	-
MSTRG.10303.1	0.928909	0.842224	0.601561	0.341181	0.617718	1.05217	1.35004	1.47138	0.703885	-
MSTRG.10304.1	2.27133	2.10275	2.03911	1.40311	1.20565	2.10385	3.02706	2.8676	3.02534	-
MSTRG.10304.2	1.05376	1.12374	0.432876	0.360468	2.11821	0.860042	0.95474	0.928988	1.1067	-
MSTRG.10308.1	0.212287	4.95526	3.11593	0.282407	8.89302	6.43321	0.244826	0.39374	2.38295	-
MSTRG.10312.1	0.169105	0.091934	0.374291	0.305493	1.94881	3.1718	0.641266	0.227297	0.685676	-
MSTRG.10312.3	3.54894	2.5938	3.02768	0.473931	0.655449	0.927589	1.84904	1.50169	1.7866	-
MSTRG.10312.5	1.47845	1.60021	0.895212	0.893373	1.39378	1.1119	2.02805	1.48781	1.622	-
MSTRG.10314.1	19.786	9.55564	9.07135	16.2667	0.704354	1.59237	21.5967	22.7343	21.5498	-
MSTRG.10314.2	0.885011	3.82519	0.364418	3.37705	14.3438	2.11403	0.693202	0.440052	1.24493	-
MSTRG.10314.3	1.24758	3.5559	1.68812	6.03818	16.665	7.25445	3.73724	1.13756	1.7353	-
MSTRG.10316.1	5.96537	7.76015	7.22983	21.7283	15.3971	9.43118	4.8202	7.78179	10.5362	-
MSTRG.10324.1	1.82437	2.25434	1.11836	0.724461	1.15079	0.061097	2.13242	1.44132	2.59663	-
MSTRG.10324.2	2.09123	1.74114	2.21578	4.15303	0.471384	3.73371	2.30583	2.53861	1.63885	-
MSTRG.10327.1	0.54918	0.820432	0.750559	0.964718	1.42498	1.97268	1.1013	1.12155	1.05812	-
MSTRG.10328.1	2.35842	2.50145	0.382231	0.602581	8.3949	2.42088	0.149296	7.95799	0.219046	-
MSTRG.10328.3	17.939	12.3596	3.70054	4.31391	3.59383	2.31787	5.20083	4.60475	3.65338	-
MSTRG.10336.2	0.377312	0.816176	0.616589	1.73313	2.71126	0.771494	0.47919	0.346128	0.220539	-
MSTRG.10340.1	7.27997	7.43931	7.03084	10.1466	13.2235	7.30889	6.90324	8.01173	8.61941	-
MSTRG.10341.1	0.854105	0.88394	1.05893	1.57676	1.74188	1.06562	0.765285	1.44534	1.0556	-
MSTRG.10345.3	3.46462	3.45024	0.009984	2.24324	1.25589	0.076545	3.71349	1.70361	3.88211	-
MSTRG.10350.1	49.0388	55.8621	63.6138	69.3791	59.9651	61.9266	45.0932	49.3842	65.2968	-
MSTRG.10351.1	0.622653	3.27943	0.952454	4.39938	1.56681	2.6536	1.23925	1.16857	1.54413	-
MSTRG.10353.10	1.758	2.53925	2.94461	2.77672	2.19727	2.27995	1.55791	1.71141	2.15206	-
MSTRG.10353.3	7.43188	9.88321	10.031	2.03983	1.23088	1.61258	4.26206	3.37379	4.49032	-
MSTRG.10353.4	3.65665	3.46992	4.06935	0.789475	0.08782	0.313113	1.88172	0.922819	1.80017	-
MSTRG.10353.6	0	3.07401	0.229418	0.49348	0.09469	0.393161	3.32065	1.3792	1.96213	-
MSTRG.10356.1	0.292347	1.58129	3.6755	0.074339	13.0863	2.59261	0.070907	0.102434	0.156993	-
MSTRG.10360.1	19.1205	24.3663	29.407	31.3362	22.6626	26.0315	25.6124	34.7905	31.1906	-
MSTRG.10362.1	0.036604	4.18952	12.0531	0.018233	22.8487	6.11781	0.41281	0.153831	0.115805	-
MSTRG.10363.1	11.3882	7.59121	5.10656	6.03042	2.42305	2.95962	9.72217	6.88553	8.27906	-
MSTRG.10364.1	2.01761	1.93166	2.15986	2.38092	1.83662	1.80368	2.71784	2.3372	1.4548	-
MSTRG.10365.1	25.2011	21.7578	22.8424	21.5991	20.3062	32.5745	27.6964	31.8607	28.2038	-
MSTRG.10365.2	2.00922	2.19252	2.2195	3.4355	5.11521	1.11118	2.33906	1.1609	1.58653	-
MSTRG.10365.3	1.06374	2.18121	1.25507	8.49291	7.87104	2.48335	1.12625	1.78775	1.051	-
MSTRG.10365.4	2.81486	1.8322	2.22802	1.55409	1.51257	2.98618	2.24132	1.63052	1.87364	-
MSTRG.10365.5	1.68531	2.03242	2.10069	1.87486	1.6693	3.77176	2.29902	2.04267	1.83564	-
MSTRG.10365.6	1.80224	1.85641	2.15501	3.35644	2.99156	1.39719	2.40419	1.24117	1.91579	-
MSTRG.10366.1	15.4411	12.0164	10.5763	10.6491	10.6666	19.888	19.8636	16.1373	11.9315	-
MSTRG.10366.2	1.17961	1.58687	1.25749	1.58316	1.89309	5.38681	5.3767	2.60431	2.91176	-
MSTRG.10373.1	0.67943	0.563255	0.622979	1.24685	5.58644	1.50564	0.546569	1.2853	0.559875	-
MSTRG.10373.2	0.979993	0.868757	0.323608	0.816592	5.53908	1.13421	1.00779	1.48258	1.5024	-
MSTRG.10373.3	1.59432	1.23457	2.29929	2.01734	2.19738	2.88855	0.818134	0.926588	1.05904	-
MSTRG.10374.1	2.38418	2.68125	2.13287	6.06872	4.09287	4.50139	3.2876	3.67251	3.882	-
MSTRG.10375.1	1.02033	1.41383	1.1876	1.86954	1.30469	1.59309	1.2791	1.42858	0.94277	-
MSTRG.10381.2	3.64286	4.7752	3.28743	8.59148	7.48379	4.72008	5.85165	9.81997	4.29146	-
MSTRG.10383.1	0.911213	0.746895	1.04325	1.33028	1.57787	2.48376	0.787693	0.711809	0.861573	-
MSTRG.10386.1	25.8621	8.86978	3.41494	6.6024	6.36596	3.3021	5.94999	17.7406	22.0997	-
MSTRG.10386.6	0.005074	6.52087	5.14226	0.035473	11.0245	5.90517	0.044064	0.05643	0.015612	-
MSTRG.10389.1	8.57263	1.9108	13.3844	5.89983	12.4964	30.1975	7.84812	7.32797	23.5199	-
MSTRG.10389.5	0.063266	14.3623	1.98158	0.81107	1.25711	1.19883	4.92952	0.549565	0.26205	-
MSTRG.10389.7	0.075318	0.125975	6.16001	0.580779	8.51295	2.75186	0.17204	6.35549	4.94533	-
MSTRG.1039.2	0.083254	0.032697	19.7365	23.6222	1.74337	23.2416	19.4381	1.09069	3.21799	-
MSTRG.1039.3	0.094657	0.272198	1.52	1.71652	1.79779	3.00897	2.3048	0.147484	1.18226	-
MSTRG.1039.4	0.374783	0.261131	3.00489	3.39077	3.78585	1.38055	2.54771	3.68674	1.05281	-
MSTRG.1039.5	1.31384	1.52457	1.76323	2.68931	0.681989	1.51708	2.4821	1.45646	1.47684	-
MSTRG.1039.7	24.1173	24.66	2.95421	1.81732	5.42603	4.69453	2.58892	5.6745	5.42703	-
MSTRG.10390.1	2.45506	3.56646	3.14175	2.17682	2.87196	1.99574	5.07327	4.66812	2.33228	-
MSTRG.10392.1	3.89965	1.29295	0.632202	11.1051	1.58061	17.1154	6.0618	2.04788	2.64615	-
MSTRG.10392.4	20.9934	21.9249	8.51641	25.1859	20.7833	13.7428	40.3476	23.2598	10.8049	-
MSTRG.10394.1	0.070861	0.115231	0.232589	2.89196	3.02929	3.05763	0.369706	0.554877	0.43608	-
MSTRG.10399.2	3.73569	3.05209	3.3285	4.61419	6.22032	5.77417	3.35587	3.72478	5.0916	-
MSTRG.1040.1	0	0.080532	0.039166	0.080832	1.58462	0.32441	0.150731	0.120628	0.12558	-
MSTRG.10404.1	0.172427	0.014767	0.504428	0.72266	2.08258	2.45601	0.153913	0.731958	0.909193	-
MSTRG.10406.1	0.839197	1.01052	1.29055	1.88833	1.23318	1.6952	1.36278	2.48496	1.1236	-
MSTRG.10416.1	1.28899	1.60347	1.23665	3.42679	2.49836	2.57006	1.77186	1.76344	2.28463	-
MSTRG.10418.1	0	1.06275	2.09789	0.197972	4.16175	1.3059	0.041736	0.121007	0.095114	-
MSTRG.10419.1	20.1737	16.2801	16.2423	21.3554	14.3645	14.7605	14.9714	14.733	17.4754	-
MSTRG.10425.2	4.76849	7.44873	6.92825	23.8876	38.8665	28.7355	6.76847	10.2303	11.374	-
MSTRG.10429.1	0.184165	0.306175	1.07538	0.240915	1.39011	1.44328	0.053029	0.097723	0.039039	-
MSTRG.10433.1	23.9499	30.3947	37.9831	1.89375	15.6565	11.446	37.4832	35.6202	4.68491	-
MSTRG.10436.1	2.89401	3.39967	5.55778	8.62907	7.77664	13.5113	5.18419	7.51836	7.21657	-
MSTRG.10436.2	2.86754	4.10999	2.93542	4.6573	3.3032	4.55743	2.48218	2.95656	2.98894	-
MSTRG.10440.1	19.5504	27.8261	25.4354	31.3849	31.6099	33.2464	26.1801	31.4492	24.4369	-
MSTRG.10440.2	9.93231	7.55302	11.3724	21.3005	15.9915	15.7096	8.03005	13.5727	13.5978	-
MSTRG.10440.3	4.32183	10.0961	8.37001	11.9555	7.68225	15.0575	4.83351	7.75819	4.70834	-
MSTRG.10444.1	1.67421	1.22466	1.42399	5.04827	3.73923	1.48346	2.05305	1.81572	2.12685	-
MSTRG.10446.1	1.84686	2.18926	1.47659	3.08706	2.45326	2.22881	2.00513	1.96256	2.49436	-
MSTRG.10457.1	0.814205	0.813762	0.254761	4.32734	3.51139	3.53855	2.91447	0.981125	2.58143	-
MSTRG.10459.1	2.10031	3.23879	2.13581	8.80495	6.70491	2.74008	1.55484	3.08881	3.12278	-
MSTRG.10474.1	5.60395	7.19514	6.3556	4.61722	4.798	6.41915	8.96762	8.84703	7.86468	-
MSTRG.10475.1	0.14718	0.273715	0.182462	0.130128	3.61291	0.071156	0.034416	0.022278	0.068741	-
MSTRG.10475.2	0.049104	0.340587	0.155824	0.047663	8.36135	0.072091	0.029547	0.043518	0.047935	-
MSTRG.10475.3	0.058547	0.273347	0.055356	0.13731	3.22197	0.068142	0.028416	0.052146	0.075696	-
MSTRG.10475.4	0.872087	1.20914	1.27315	1.92465	0.860493	1.11801	1.72309	2.01412	1.24495	-
MSTRG.10476.1	17.2551	26.5759	24.3215	14.8918	21.5592	26.4249	12.2768	31.3135	30.4251	-
MSTRG.10481.2	13.1986	14.9028	12.6772	2.85595	17.3109	19.143	0.794766	6.92286	9.54874	-
MSTRG.10483.1	0.676026	1.67749	0.900413	2.7853	1.89989	0.684141	0.745008	1.72171	0.755607	-
MSTRG.10485.1	0.932894	0.971497	0.448781	0.397507	0.543632	1.35787	1.43666	0.671264	0.833133	-
MSTRG.10487.1	5.24378	7.2726	4.39389	7.12857	11.6057	17.0971	5.2789	8.62651	8.76233	-
MSTRG.10487.2	6.54241	10.8519	5.59236	5.82088	12.4539	11.7445	6.14243	12.5992	10.8911	-
MSTRG.10487.4	10.6365	4.27521	7.06733	1.79178	0.771881	0.701097	10.4846	4.30718	5.14934	-
MSTRG.10487.5	7.24279	3.18989	5.92781	0.696693	0.493812	0.74747	7.94272	2.04486	3.16647	-
MSTRG.10487.7	1.42162	7.19358	5.13631	0.303784	0.331696	0.890962	1.8567	1.77366	2.47201	-
MSTRG.10488.2	0	5.01683	3.09025	0.035994	28.5386	1.15454	0.102996	0.227764	0.189557	-
MSTRG.10489.1	0.059225	0.915002	1.35684	0.390603	7.49604	0.555046	0.073825	0.271004	0.404212	-
MSTRG.10497.1	20.3011	16.3963	26.6267	10.678	6.48626	18.7711	24.471	17.7195	23.2157	-
MSTRG.10498.2	39.6699	23.5563	16.2632	8.09136	5.30192	11.155	39.1464	23.809	20.2991	-
MSTRG.10498.3	5.59138	2.40927	4.87231	0.337188	1.69884	3.86179	5.02398	4.22712	3.6551	-
MSTRG.10499.1	3.42274	3.42395	1.03138	4.8069	3.99938	3.50827	3.47165	3.78189	3.77372	-
MSTRG.105.1	7.1631	7.26513	7.74588	5.42916	7.04325	5.45188	7.00786	7.36722	6.332	-
MSTRG.10504.1	0	1.51947	1.49865	0.029567	6.3082	0.441041	0.170923	0.188674	0.062915	-
MSTRG.10515.1	2.06996	2.17743	1.72602	2.58304	1.33505	1.17103	1.71738	2.21122	2.93682	-
MSTRG.10516.1	0.069055	0.603012	1.27731	0.087555	3.83806	1.90233	0.06628	0.024429	0.023177	-
MSTRG.10518.1	2.45851	4.12816	2.96634	1.8306	5.14671	2.52803	2.27498	2.30998	2.23391	-
MSTRG.10530.1	0.998265	1.40111	1.38763	1.12247	2.18155	2.36037	1.56122	1.78826	1.33176	-
MSTRG.10538.1	3.54353	3.81108	4.06712	6.93361	6.13922	8.43661	3.13024	4.83109	5.22121	-
MSTRG.10538.2	0.820385	0.892417	0.476278	1.46299	3.40997	1.68826	1.09102	0.754652	2.01081	-
MSTRG.10538.3	1.06117	0.955582	1.21151	1.89331	2.07122	2.3034	1.71416	1.71888	0.86088	-
MSTRG.10539.1	10.8557	15.6126	14.6196	24.7842	8.73694	6.72788	10.1606	8.89403	14.5914	-
MSTRG.10544.1	0.446111	2.57191	4.24414	0.170311	17.7936	1.25127	0.219376	0.374347	0.125596	-
MSTRG.10546.1	2.43612	3.10769	3.01151	7.42894	7.40537	7.13238	1.84122	3.40104	4.83005	-
MSTRG.10550.1	7.22926	6.59696	3.68434	6.33125	11.4574	1.53998	4.69665	4.88338	4.59984	-
MSTRG.10550.2	1.96116	0.45681	1.06205	9.75291	5.90583	6.59472	3.61383	5.31704	2.15992	-
MSTRG.10552.1	1.396	2.06973	2.02052	4.87327	6.41186	2.14773	2.29108	2.23213	3.03692	-
MSTRG.10552.3	0.785723	1.47617	2.93148	11.228	5.40482	2.28471	2.77998	3.72465	1.72778	-
MSTRG.10553.1	36.1996	46.4178	40.5115	38.6589	53.51	34.9779	52.7233	53.7859	49.8583	-
MSTRG.10554.1	3.33417	3.08585	3.3124	3.65154	2.92009	1.70083	1.92355	2.73577	2.75096	-
MSTRG.10555.2	1.73751	0.323684	0.028444	0.565911	2.99467	0.05026	2.73275	0.564618	0.021456	-
MSTRG.10559.2	0.214571	0.350487	0.182518	0.689237	0.646141	1.12633	0.421103	0.462455	0.35416	-
MSTRG.10561.1	0.93985	0.721925	0.852484	0.080557	0.38754	0.996323	1.8372	0.847895	0.848493	-
MSTRG.10563.1	0.228191	1.02511	0.921874	0.420535	6.9092	2.91499	0.499366	0.662507	0.268805	-
MSTRG.10564.5	0.243224	0.355009	0.14555	0.425994	0.304945	2.60359	0.397424	2.55504	0.447517	-
MSTRG.10565.2	2.00317	1.8579	2.81781	1.39838	5.47002	1.66082	0.988873	3.92337	0.87115	-
MSTRG.10568.1	3.64608	4.64807	1.61251	5.96845	6.86526	3.38793	2.81623	3.79155	3.44606	-
MSTRG.10568.2	5.28477	6.16437	4.88589	16.8415	16.0014	9.17682	7.29211	4.83579	8.91666	-
MSTRG.10569.1	0	0.073165	0.138831	0.478096	1.25983	0.088349	0.061235	0.347432	0.226422	-
MSTRG.1057.1	0.986391	1.71834	0.885816	0.170724	0.452822	1.40165	1.88886	0.714177	1.01826	-
MSTRG.10576.1	4.23579	6.4104	11.0464	7.40356	10.1322	17.6373	0.036802	6.73708	17.1906	-
MSTRG.10580.2	10.4746	10.5267	8.9848	15.5008	13.6293	9.46783	11.286	11.6735	12.6133	-
MSTRG.10581.1	3.14373	2.60637	3.12342	4.44452	3.49705	3.76811	2.83554	3.41908	4.48771	-
MSTRG.10587.1	1.34553	1.57988	1.59797	2.62421	4.06152	2.31134	0.686183	2.50955	1.91618	-
MSTRG.10590.2	8.48348	10.4855	11.6965	15.1368	18.3746	21.4848	10.058	13.2968	11.474	-
MSTRG.10592.1	0.701519	2.12559	1.78787	2.5411	2.03513	1.12041	2.394	1.20873	2.76453	-
MSTRG.10592.3	0.781079	1.81827	0.891532	2.66222	2.20417	1.22253	0.574873	1.57803	1.5869	-
MSTRG.10593.1	4.34486	4.36035	1.54784	0.802356	5.55526	2.92338	4.6761	4.66318	2.59914	-
MSTRG.10593.2	6.86785	3.59475	4.85904	3.91068	1.43327	1.14633	6.56544	2.13858	5.38045	-
MSTRG.106.2	1.97347	1.83058	0.21097	0.704074	2.37619	2.11871	2.39857	2.31266	1.53182	-
MSTRG.10601.1	0.00287	2.36892	5.35801	0.001669	22.153	3.82966	0.053188	0.010137	0.006831	-
MSTRG.10603.1	1.09518	0.867607	0.785261	1.00415	14.0866	0.715041	1.2931	0.561176	0.916933	-
MSTRG.10607.1	0.503489	1.88441	1.89994	1.06075	6.36564	0.740754	0.804974	0.019367	0.764917	-
MSTRG.10607.3	1.81895	2.76501	0.611109	3.83673	1.54859	4.75269	2.28681	2.53364	4.95063	-
MSTRG.10609.1	1.41843	1.52998	1.2544	1.32841	1.2883	1.46055	1.35206	1.61919	1.73771	-
MSTRG.10610.1	0.994656	2.03001	1.59535	1.64752	3.86316	1.73462	1.99401	1.65353	1.69095	-
MSTRG.10617.1	2.43143	2.51938	1.85684	2.64166	2.08773	2.35053	4.55648	3.84111	3.99687	-
MSTRG.1062.1	3.75802	1.33814	2.66783	12.5776	5.84801	12.5059	5.57556	3.80032	1.82146	-
MSTRG.10621.1	2.50802	2.28385	2.26049	1.78805	2.30893	2.30092	4.50766	2.12264	3.83441	-
MSTRG.10621.2	1.77509	0.744708	1.13273	1.44031	1.08545	5.06404	1.67194	2.91813	1.27792	-
MSTRG.1063.1	0.730509	7.1902	8.58298	9.24896	1.03625	4.13278	8.971	9.18092	7.50887	-
MSTRG.1063.2	8.85138	6.38225	9.37528	8.83844	13.9473	15.1099	8.06884	8.28708	11.6912	-
MSTRG.10634.1	3.3932	2.61748	3.31343	3.94104	1.42713	1.8286	3.29157	4.19529	3.47293	-
MSTRG.10634.2	2.08385	4.25974	3.48111	2.99929	3.74227	3.34754	2.34096	1.38926	2.53772	-
MSTRG.10634.4	9.31143	15.4218	11.7427	19.243	23.5696	3.32756	12.1243	14.846	17.6838	-
MSTRG.10637.2	2.99919	4.77292	3.2646	5.55549	6.04114	5.51124	3.76656	0.174981	1.04421	-
MSTRG.10637.7	3.08581	3.8173	2.35908	6.01711	5.0756	0.054702	3.07905	7.0128	12.3479	-
MSTRG.1064.1	4.8422	3.52041	2.78649	1.98653	11.7001	0.558302	5.5216	4.24022	3.63611	-
MSTRG.1064.2	0.533914	0.377117	0.395081	0.398625	1.10651	0.482243	0.579372	7.58632	6.92155	-
MSTRG.10640.1	0.633571	0.298676	0.348614	0.721397	0.83913	1.41709	0.816307	1.0052	0.785452	-
MSTRG.10645.1	54.1504	34.4854	30.1904	13.8903	12.4824	23.925	50.0211	25.0396	35.5886	-
MSTRG.10645.2	39.8499	23.7933	20.081	10.7775	9.18873	14.4857	31.5116	17.6019	22.4409	-
MSTRG.10647.1	2.09153	1.39952	0.853367	1.00084	0.832143	1.27005	1.75728	0.89475	0.852712	-
MSTRG.10654.1	0.979358	2.23	1.21717	2.16757	5.83702	1.76003	0.955359	1.52545	1.48299	-
MSTRG.10662.1	3.71895	7.86614	16.8527	2.41814	25.9905	24.8816	1.45373	5.15326	1.70096	-
MSTRG.10662.2	2.89504	3.1952	2.89069	5.816	5.05576	8.01393	6.05477	6.58458	4.22387	-
MSTRG.10663.1	2.04296	2.03841	1.53535	3.22494	2.58042	3.95171	2.61867	2.36742	3.08125	-
MSTRG.10666.1	0.508119	0.384683	0.894236	2.2854	2.48198	3.12433	1.28466	0.855951	0.323871	-
MSTRG.10667.1	0.605121	0.595921	0.349125	0.516805	0.388964	0.371703	2.02706	1.86603	0.505891	-
MSTRG.10669.2	2.47118	0.552769	3.75177	1.15407	1.15798	4.05209	1.02214	3.08122	1.91487	-
MSTRG.10676.10	0.177254	0.283919	0.421029	0.852085	1.92218	4.58658	0.255726	0.332675	0.974295	-
MSTRG.10676.3	2.72755	1.99325	3.20423	0.272156	1.99515	0.03332	2.41237	4.46552	0.213924	-
MSTRG.10676.9	0.179667	0.335708	0.407949	0.765383	5.24779	4.25318	0.328826	0.750561	0.34737	-
MSTRG.10678.1	2.46189	2.76948	2.59998	2.65002	2.68611	1.66167	2.60844	3.07999	2.71196	-
MSTRG.10680.1	0.923243	2.34771	2.21519	1.20813	9.53484	1.52688	0.450307	0.459611	0.887011	-
MSTRG.10687.2	0.499515	0.918428	0.793375	1.32087	4.4915	2.43591	0.821961	0.851672	0.593777	-
MSTRG.1069.1	14.8575	21.9691	19.6593	33.6326	31.8512	13.2426	17.4542	24.3259	24.3953	-
MSTRG.10691.1	8.44554	1.2484	1.43758	9.8512	0.945855	3.09935	4.09007	1.49777	2.82166	-
MSTRG.10691.3	6.0987	9.12115	6.89509	0.218075	9.80808	2.31322	3.79968	6.59573	1.61754	-
MSTRG.10701.1	2.36301	1.7413	5.26003	4.77676	3.07094	6.28011	4.48017	1.91085	3.46602	-
MSTRG.10701.2	2.81731	8.75613	0.805492	1.56839	1.10464	2.89054	1.07783	7.33737	8.34858	-
MSTRG.1071.1	0.891319	1.04564	1.50159	3.17827	2.74541	2.38652	1.30454	1.37749	1.82871	-
MSTRG.10714.1	1.18908	2.68722	2.99743	1.14664	12.5501	1.08562	1.05764	0.791988	1.47074	-
MSTRG.10717.1	10.4782	3.76113	6.60201	14.8236	10.8554	14.0922	10.2809	13.3808	12.1065	-
MSTRG.10717.2	1.93662	0.49926	0.633723	1.16151	1.08984	2.03523	1.74494	1.82046	3.05562	-
MSTRG.1072.3	0.859661	1.01772	0.453717	5.82542	1.76608	0.972612	0.253429	0.289507	0.607055	-
MSTRG.10722.1	0.059904	1.55291	2.26342	0.684654	9.15925	1.48991	0.035492	0.117336	0.078384	-
MSTRG.10725.2	0.301661	0.154979	0.538524	0.889102	1.70594	1.01539	0.557906	0.604415	0.738502	-
MSTRG.10727.4	88.9298	82.5967	93.4338	102.823	79.6859	86.482	88.0379	101.013	91.8928	-
MSTRG.10727.5	4.61821	4.73076	3.9577	4.92772	3.22573	3.74812	4.68901	4.27593	4.64117	-
MSTRG.10729.1	0.289805	0.911876	5.32979	2.31402	7.86485	3.51503	0.296636	0.612918	0.8765	-
MSTRG.10730.1	1.35538	4.45611	5.64292	1.02217	4.93175	2.35673	0.547051	1.18277	4.20843	-
MSTRG.10740.1	0.639786	1.41003	1.35474	3.49728	4.95033	2.54906	0.920401	1.22507	1.32968	-
MSTRG.10749.1	9.87751	10.6057	11.1704	4.86051	3.23155	4.69825	8.43792	8.71601	9.68624	-
MSTRG.1075.1	0	2.24174	3.15753	0.09497	9.28487	1.45082	0.586008	0.204647	0.379743	-
MSTRG.10756.1	14.9761	18.5476	16.5524	25.1783	20.5494	22.9995	17.9717	21.6159	21.8928	-
MSTRG.10757.2	0.454896	1.0768	0.473743	1.88341	1.40366	1.34194	2.2959	1.11295	1.50939	-
MSTRG.10758.1	14.7302	17.2948	18.7237	14.2531	8.82635	8.96313	14.4345	13.3703	12.2433	-
MSTRG.10758.3	2.52154	5.63037	4.70271	3.58444	3.0238	2.37215	3.71513	5.20439	2.58501	-
MSTRG.10759.1	10.0561	13.8435	0.787033	15.2717	0.73978	0.660825	9.59471	6.39858	13.1801	-
MSTRG.1076.1	0.054609	0.401773	0.624003	0.043961	3.46939	0.253908	0.010483	0.046363	0.046303	-
MSTRG.10762.1	59.6227	95.7321	88.302	143.856	201.537	311.905	56.3696	83.4691	83.8779	-
MSTRG.10762.2	11.4992	13.4787	2.32631	23.9133	32.2948	29.3289	11.1163	17.6578	12.7348	-
MSTRG.10763.2	0.852218	0.985338	1.17225	0.315006	0.225816	0.079849	1.05367	0.593173	0.573995	-
MSTRG.10763.4	1.60164	0.622002	0.473698	0.226216	0.385931	1.0813	1.65122	0.611317	0.50703	-
MSTRG.10763.5	1.24397	1.69148	1.83911	1.4303	1.24715	2.04312	0.932953	1.43427	1.84437	-
MSTRG.10766.1	1.0819	0.878888	0.311623	1.2002	1.06983	1.48522	1.38682	2.47365	1.90267	-
MSTRG.10777.1	0.651478	0.658739	0.112507	8.59913	8.60135	7.67572	0.639507	1.15871	0.936075	-
MSTRG.10778.1	9.96854	4.44488	4.14686	26.234	43.9278	39.9886	3.77269	9.49659	9.63053	-
MSTRG.10785.1	1.26628	1.52584	1.33507	1.22776	2.37559	1.55219	1.20101	1.27504	1.84863	-
MSTRG.10788.1	0.355697	2.23367	0.075925	3.36997	3.17101	0.020886	0.016734	0.009454	0.386679	-
MSTRG.10788.2	1.07629	0.071271	0.03324	0.044668	0.051924	0.037297	0.067442	0.020948	0.053095	-
MSTRG.10795.2	3.94904	0.749719	3.77079	3.93138	4.12667	1.14634	1.74823	4.37822	3.67068	-
MSTRG.10802.16	1.06311	0.022153	1.60493	0.006507	7.5455	7.31469	0.03488	0.010849	0.012139	-
MSTRG.10802.2	0.875965	0.912811	1.63875	1.06474	0.464016	1.33593	1.05711	0.249099	0.245067	-
MSTRG.10802.3	1.57555	3.44362	4.95777	1.24592	0.681734	0.726239	3.08311	3.0137	4.59501	-
MSTRG.10802.8	2.78037	1.28874	7.83833	1.01432	0.57672	0.668814	2.26407	1.19002	0.446661	-
MSTRG.10804.1	5.75452	9.09792	10.3076	1.0554	1.199	0.306447	2.27353	0.680323	1.28068	-
MSTRG.10814.1	7.0354	7.09438	4.59304	7.13181	6.752	6.36318	6.28131	6.49641	7.33378	-
MSTRG.10816.2	7.40518	8.37511	28.5763	52.7467	8.45004	8.82249	35.5904	39.1144	5.75073	-
MSTRG.10817.2	3.97383	3.90042	4.00216	5.67466	4.37119	5.01579	5.10417	4.46482	5.25219	-
MSTRG.10818.3	2.81802	3.05041	1.57486	5.85029	1.56596	3.82813	2.23005	2.89998	2.69272	-
MSTRG.10819.3	0.024178	0.008201	0.035934	0.015356	0.02877	10.8888	0.007411	0.015681	0.005071	-
MSTRG.10820.2	0.490733	1.32805	4.30342	1.59615	20.8066	2.28963	1.74761	1.74276	1.3981	-
MSTRG.10824.1	0.701502	0.562649	0.462119	1.14419	0.768368	4.31585	0.521976	0.85736	2.06659	-
MSTRG.10826.1	0.848067	0.838123	0.385379	1.73534	1.0731	1.90752	1.62399	2.07638	1.85328	-
MSTRG.10827.1	1.97802	9.31515	1.41725	7.28836	2.30342	7.94473	7.02317	7.47222	8.11704	-
MSTRG.10828.2	1.97089	1.67617	1.51449	2.08578	4.55152	4.83986	2.57304	2.54108	2.01549	-
MSTRG.10828.3	2.99966	2.78445	2.85153	3.28307	3.21733	5.81523	1.83542	2.32284	2.52587	-
MSTRG.10831.1	4.35782	2.78475	2.13687	7.47748	4.66573	8.4587	3.70731	4.95933	5.26017	-
MSTRG.10832.1	0.102605	1.26015	1.07687	2.63633	7.4662	0.508463	0.105659	0.192091	0.049468	-
MSTRG.10832.2	23.6621	24.3805	23.7163	24.5326	22.6264	25.1916	26.2881	28.4368	26.1392	-
MSTRG.10845.1	0.754768	2.44734	3.84161	2.08565	8.62725	2.83067	0.611256	1.28869	1.57639	-
MSTRG.1086.1	0.201749	0.343957	1.97709	0.407475	0.414461	4.91943	1.32778	0.389351	1.27695	-
MSTRG.10863.1	0.503336	0.688618	1.28344	0.470977	4.60773	0.686531	0.328768	0.366616	0.43639	-
MSTRG.10870.1	3.10829	3.53068	4.98346	5.95964	4.24389	6.44128	3.58742	5.4568	3.74533	-
MSTRG.10872.1	34.6508	27.3108	22.0431	13.0227	8.77493	8.5366	24.9759	14.1124	17.1773	-
MSTRG.10873.1	68.4564	75.5964	77.6015	56.7531	46.7883	62.3886	78.0856	61.1544	68.3674	-
MSTRG.10873.2	101.973	101.702	90.547	61.9523	55.4969	51.1017	77.8295	75.3503	78.2763	-
MSTRG.10877.1	1.41392	0.988552	1.2576	2.71906	2.46744	1.96811	1.90028	1.24613	2.76488	-
MSTRG.10877.2	0	1.36874	0.961176	7.44348	6.45194	1.43758	0.030607	0.319058	1.17995	-
MSTRG.10877.3	0.470065	0.079483	0.096665	0.346171	0.295307	2.11367	0.044539	1.4645	0.097767	-
MSTRG.1088.1	0.002467	1.06886	0.000735	8.3e-05	1.39454	0.016228	0.296749	0.383004	0.000662	-
MSTRG.1088.2	0.33635	0.766796	0.530992	1.32165	2.31651	0.863677	0.604615	0.666827	0.519708	-
MSTRG.10883.1	0.446152	0.472202	1.31609	0.096341	2.4734	3.06264	0.443537	0.372046	0.574681	-
MSTRG.10886.1	0.050178	0.744298	0.533499	1.51448	2.90864	5.41233	0.022606	0.282597	1.28989	-
MSTRG.10889.1	2.1301	2.15222	2.06335	4.19434	4.13358	1.61178	0.012928	1.30679	1.042	-
MSTRG.10890.2	0.726547	1.49845	1.7174	2.28808	1.24057	1.29468	0.679259	3.14024	0.873321	-
MSTRG.10894.1	0.731136	0.806782	1.18424	0.727419	0.860707	0.686416	0.960244	1.43424	0.893605	-
MSTRG.10894.3	0.226651	2.07872	0.832341	1.12825	5.78076	0.865024	0.167634	0.211718	0.272436	-
MSTRG.10894.4	1.0432	1.4223	1.39486	0.74359	0.67123	1.18553	0.939611	1.04206	1.19896	-
MSTRG.10896.1	0.616026	0.544921	0.336862	1.64676	1.38967	15.1471	1.3234	1.4551	0.721502	-
MSTRG.10896.3	1.82979	0.083635	0.164227	1.50561	0.00552	0.211082	1.78503	0.263878	0.102589	-
MSTRG.10902.1	0.050453	4.44732	2.09072	0.050515	20.3945	0.880954	0.101451	0.107087	0.053474	-
MSTRG.10904.1	0.137524	0.738096	1.28819	0.110445	4.9388	1.09148	0.192716	0.273346	0.055527	-
MSTRG.10914.1	0.371298	1.45263	1.08099	1.96236	4.13899	2.60425	0.750762	0.839378	1.27116	-
MSTRG.10916.1	0.878705	0.912825	0.560291	0.576033	1.09385	3.73038	1.6997	1.11392	0.330089	-
MSTRG.10919.1	0.104989	0.860658	0.460275	0.654744	4.14884	0.688649	0.410433	0.59576	0.504963	-
MSTRG.10926.2	0.009682	2.55785	0.404837	0.019485	3.61933	0.336296	2.08642	0.061854	2.21201	-
MSTRG.10931.1	18.1503	24.9765	31.4972	2.97469	0.051314	0.231214	10.6783	15.5504	16.204	-
MSTRG.10934.1	25.0602	38.8891	34.3461	42.7581	32.8949	39.8807	32.2328	34.5933	35.2589	-
MSTRG.10936.1	0.013696	3.80628	1.63138	0.374151	6.52225	1.18206	0.286163	0.018321	0.131489	-
MSTRG.10947.1	0.135819	6.86027	3.79359	0.230731	7.19669	2.54509	0.170673	2.84556	0.339426	-
MSTRG.1095.1	14.3621	14.702	14.2324	16.9295	0.757753	10.3873	18.3298	11.912	11.8699	-
MSTRG.1095.2	0.885678	4.57708	0.697446	0.748748	19.6417	0.571093	1.7513	0.891068	0.816418	-
MSTRG.1095.6	1.94556	2.1874	2.38563	2.0958	1.92617	4.72901	2.38897	1.93442	2.18937	-
MSTRG.10951.1	0.547592	0.555434	0.566343	0.691903	0.624387	1.57924	0.665743	0.750781	0.512207	-
MSTRG.10966.1	0.013141	3.53776	2.98531	0.002821	13.1528	1.3717	0.032349	0.06493	0.007925	-
MSTRG.10967.3	2.53269	5.97958	2.5902	2.19676	0.006301	0.563176	0.894637	0.167252	0.855875	-
MSTRG.10967.5	0.185921	0.728582	0.045127	0.758177	0.070949	18.4301	0.076979	1.65222	0.804899	-
MSTRG.1097.1	13.1219	10.6387	9.32052	13.1937	6.63531	15.7868	14.0934	14.8549	13.832	-
MSTRG.10972.1	18.8294	20.7031	19.0518	29.3554	22.9908	16.201	18.9533	20.8903	21.8763	-
MSTRG.10972.2	1.18618	1.11924	2.09067	2.19705	2.14064	5.61459	1.06753	2.41943	1.7751	-
MSTRG.10976.1	2.01147	1.68693	1.38827	2.89867	1.25837	1.74925	1.47295	2.86495	2.6519	-
MSTRG.1098.1	0.005452	0.096598	0.063213	0.027433	1.27384	0.099713	0.007123	0.010769	0.016695	-
MSTRG.10980.2	8.04724	8.13819	8.32908	12.2467	10.3684	14.5987	8.38805	10.262	7.44719	-
MSTRG.10983.1	4.97968	4.49941	5.26107	4.05519	6.87624	7.54271	2.73778	3.51569	3.32946	-
MSTRG.10983.2	3.36804	2.86521	5.95272	4.01309	11.5806	8.4282	1.73454	6.13285	2.32704	-
MSTRG.10986.2	5.40043	7.41047	4.93947	3.52647	7.11155	8.83442	5.79485	5.86667	4.81977	-
MSTRG.1099.2	2.43	1.79361	2.05681	3.65246	2.32074	6.12122	1.64762	4.14426	7.1172	-
MSTRG.10993.1	22.5957	26.7185	24.353	13.1133	10.4826	15.5519	29.1552	25.7908	22.7786	-
MSTRG.11005.1	10.8062	12.1133	12.5228	13.6217	15.5531	11.0728	12.1603	14.2081	13.0213	-
MSTRG.11015.1	0.593742	3.01916	4.4505	4.94611	4.76634	2.95924	2.03778	3.84363	1.13434	-
MSTRG.11015.2	17.6212	16.3564	18.0818	12.0596	7.23355	6.16221	15.9493	18.7918	19.3578	-
MSTRG.11022.1	0	1.01544	1.50294	0.229591	6.97985	0.498356	0.055301	0.061146	0.1832	-
MSTRG.11027.1	23.9701	24.2945	26.2707	44.5268	27.4901	27.8308	29.1328	36.0912	35.9213	-
MSTRG.11029.1	0.686801	1.55876	3.3589	1.15432	5.72837	4.51774	0.848206	0.900569	1.41795	-
MSTRG.11029.5	0.720898	1.17444	0.069029	2.45125	0.113985	4.04367	1.79412	1.12643	0.113072	-
MSTRG.11038.11	0.557485	0.741982	0.819473	0.924487	0.9653	1.67065	0.461303	0.63392	0.640963	-
MSTRG.11038.12	2.523	5.72968	2.97996	12.1582	11.1221	6.46043	4.15643	7.04483	8.37523	-
MSTRG.11038.2	0.504455	0.518819	0.62362	0.828545	1.06791	1.2653	0.445726	0.661333	0.572717	-
MSTRG.11038.3	0.844711	1.36307	1.19254	3.17642	2.19303	4.76261	0.575297	1.14854	1.4569	-
MSTRG.11038.4	0.491342	0.532232	0.580246	1.58607	1.23374	1.31595	0.438379	0.845004	0.865673	-
MSTRG.11038.6	0.547416	0.398507	0.733909	0.615313	0.70113	1.76025	0.525101	0.583877	0.4081	-
MSTRG.11038.7	0.565655	0.703318	0.808222	0.86175	0.961004	1.5193	0.453576	0.648219	0.621845	-
MSTRG.11038.8	0.426774	0.456529	0.512395	0.698116	0.887833	1.22697	0.386474	0.60104	0.491033	-
MSTRG.11038.9	1.63444	1.21258	2.13029	3.7579	3.2204	2.46653	0.9433	1.40219	1.69782	-
MSTRG.11040.10	0.475361	0.972502	1.07223	1.32872	0.857904	1.01937	0.532134	0.936315	0.892718	-
MSTRG.11040.11	0.66929	0.755067	0.733659	1.11559	1.26711	1.34362	0.722521	0.548913	0.776726	-
MSTRG.11040.16	4.03021	5.07886	7.59512	0.688374	2.94555	8.00113	4.20644	5.70383	6.64292	-
MSTRG.11040.17	1.29196	0.7684	0.847128	1.41412	1.10588	1.8767	1.08937	0.821398	0.781701	-
MSTRG.11040.18	1.14162	2.12437	3.0518	2.53291	1.80794	3.25849	1.85668	2.87002	1.70228	-
MSTRG.11040.3	0.311744	0.049947	0.007823	0.182928	0.854456	1.05511	0.192374	0.085019	0.083191	-
MSTRG.11040.4	1.33078	1.13718	1.59858	1.642	1.51182	0.748804	1.44882	1.44476	1.53228	-
MSTRG.11040.9	0.029414	0.007912	0.002506	0.143278	0.90053	1.07846	0.011582	0.029209	0.008708	-
MSTRG.11041.1	0.41841	14.5809	1.33152	0.146317	7.11402	0.13739	0.211199	0.268303	13.2573	-
MSTRG.11041.2	4.89993	1.48632	0.84956	2.38328	0.788197	1.60721	2.97073	2.49079	1.7036	-
MSTRG.11041.3	2.30809	3.17415	2.76142	3.77942	3.4371	4.78054	2.59921	3.22151	2.83369	-
MSTRG.11043.4	0.143323	0.334347	0.046612	0.841548	1.72572	1.74015	0.037462	0.302683	0.130116	-
MSTRG.11047.1	7.08387	0.006817	11.6654	0.026621	3.66569	3.76456	9.44323	4.77591	8.69607	-
MSTRG.11047.4	6.82329	1.89959	14.073	1.6578	5.6116	12.5085	8.08434	15.0664	13.4199	-
MSTRG.1105.1	1.02255	0.947658	0.839941	1.30305	3.95194	1.24662	0.904962	1.02821	1.23367	-
MSTRG.11058.1	0.280585	0.358308	1.59558	1.13972	0.551027	0.351758	0.184472	0.021815	0.187365	-
MSTRG.11061.1	5.11132	6.87327	7.55648	11.9205	10.5422	8.9266	5.32404	7.9325	7.95088	-
MSTRG.11061.2	3.21479	3.44977	2.99333	2.66563	3.66603	7.23853	4.75283	4.02904	3.6075	-
MSTRG.11062.2	0.621409	4.70101	0.501531	4.74607	5.08328	4.91239	4.41407	6.19033	5.76657	-
MSTRG.11062.3	2.22734	0.938495	0.29945	7.17022	6.09656	2.31139	3.12833	3.91659	5.2713	-
MSTRG.11063.1	0.844471	6.48283	28.1359	1.26842	40.3582	18.6696	1.35232	1.62517	1.29164	-
MSTRG.11064.1	3.43676	3.95716	2.32184	2.06888	2.28005	2.65053	2.21821	2.61626	3.57198	-
MSTRG.11064.2	0.871522	4.50666	1.19881	0.87578	3.56921	2.69071	0.809136	0.93509	1.14102	-
MSTRG.11064.3	0.969405	1.27429	0.924192	0.703871	0.564509	0.972487	0.613616	0.70552	0.819139	-
MSTRG.11064.4	0.844589	2.13427	0.720279	0.775845	2.27585	1.53167	0.489443	0.511227	0.587349	-
MSTRG.11064.5	1.05534	1.37247	0.957754	0.849093	1.86679	1.66977	0.568073	0.582562	0.980327	-
MSTRG.11064.7	0.606112	0.76682	0.784523	0.597109	0.958473	1.17696	0.497076	0.772121	0.504089	-
MSTRG.11064.8	7.77251	1.71247	5.04409	8.01625	1.68574	2.01681	9.47674	8.69955	7.94649	-
MSTRG.11065.1	1.90756	1.49909	1.65409	1.73484	1.98781	9.22102	1.67784	2.45198	1.92157	-
MSTRG.11065.10	0.862756	0.952082	0.880032	1.0012	1.02971	4.56398	1.29314	0.986001	0.894093	-
MSTRG.11065.12	0.550586	0.572168	0.508781	0.673748	0.737572	1.03165	0.664229	0.620569	0.532351	-
MSTRG.11065.13	1.05225	1.17303	1.02629	1.86908	2.11602	1.79857	1.36869	1.75508	1.50364	-
MSTRG.11065.14	0.634232	0.951775	0.975858	0.925254	0.992768	1.51172	0.87936	1.10165	0.991855	-
MSTRG.11065.16	1.64026	2.71705	2.57647	2.33934	2.07614	1.74438	2.56142	2.60477	2.81993	-
MSTRG.11065.2	1.87322	1.50021	1.66125	2.25656	1.5518	8.02904	2.17078	1.47444	1.4361	-
MSTRG.11065.3	0.696851	0.768223	0.712399	0.835625	0.833671	6.30649	0.952839	0.786881	0.723178	-
MSTRG.11065.4	2.18606	2.43624	2.24889	3.15168	3.22885	6.0885	4.14344	3.34912	2.96983	-
MSTRG.11065.5	12.4355	14.702	15.6701	17.7501	19.9663	4.51321	16.7321	16.8504	19.0312	-
MSTRG.11065.6	0.481816	0.496791	0.432763	0.618049	0.700061	2.58106	0.484088	0.523103	0.455679	-
MSTRG.11065.7	0.528996	0.814427	0.848125	0.862834	0.854664	1.26248	0.676595	0.922503	0.875539	-
MSTRG.11065.8	1.07189	1.16439	1.02407	1.90961	1.99161	1.17489	1.3474	1.63471	1.51712	-
MSTRG.11065.9	0.598067	0.754037	0.642869	1.89526	1.25068	0.869484	0.89348	1.18224	0.75124	-
MSTRG.11066.2	8.79017	3.58127	9.48498	13.8732	1.58237	9.12674	6.4496	3.08235	7.52776	-
MSTRG.11066.4	2.14302	2.25374	2.95	3.15577	2.34866	1.27378	1.512	2.43849	2.35929	-
MSTRG.11066.6	0.153359	6.95715	4.50681	3.66583	10.3876	1.99574	1.54526	10.2259	0.410104	-
MSTRG.11067.2	3.89466	4.95694	5.10041	3.5616	3.13951	2.61197	3.54323	3.69558	4.07376	-
MSTRG.11070.2	1.02624	1.33818	0.91395	2.02742	0.979289	0.149889	1.1417	0.695839	2.99103	-
MSTRG.11073.1	0.047546	0.469015	0.47097	0.119767	3.28339	0.379391	0.136368	0.113747	0.036986	-
MSTRG.11076.1	0.686765	0.559118	0.697537	0.470276	0.958471	0.146354	0.46826	1.25845	0.358558	-
MSTRG.11076.4	0.758087	1.57549	0.266679	0.367056	0.372865	0.737087	0.403586	1.09291	1.08406	-
MSTRG.11076.5	1.21859	0.911218	3.27606	3.55412	2.413	3.40155	3.34659	0.886529	3.45255	-
MSTRG.11078.3	0.096285	0.262869	0.073385	0.10684	1.62835	0.650312	0.121392	2.77261	3.01139	-
MSTRG.11078.4	0.310905	1.39517	0.723032	8.35143	6.43517	2.23076	1.40315	3.91511	2.7079	-
MSTRG.11079.1	24.57	33.3895	30.0704	24.0679	22.9556	26.0574	30.7322	31.5168	28.5699	-
MSTRG.11083.1	3.55335	3.91939	4.12572	2.74547	2.48832	1.77502	2.37937	2.4713	3.04266	-
MSTRG.11084.3	0.866012	1.5444	1.54144	1.93705	1.2617	3.65761	1.27192	1.58915	1.44528	-
MSTRG.11089.1	3.75782	4.07466	3.57497	3.02251	3.72209	2.20086	2.93899	2.94318	3.37774	-
MSTRG.1109.10	35.4488	26.2946	20.6165	28.2302	31.2054	48.7289	35.8858	34.3476	21.9023	-
MSTRG.1109.2	61.1013	51.0549	34.2668	29.8672	34.929	44.7775	57.0915	63.9459	30.5526	-
MSTRG.1109.3	0.317002	0.490215	0.263944	0.986916	1.24951	1.32235	0.668074	0.889454	0.288724	-
MSTRG.1109.4	1.04059	1.84419	0.904022	2.58514	2.32126	5.63053	1.54551	3.22209	0.297345	-
MSTRG.1109.5	1.01958	0.411793	0.22744	0.414971	1.16479	1.181	0.622548	0.515165	0.226484	-
MSTRG.1109.6	0.340918	0.211991	1.4035	0.499	0.049575	0.128051	0.347785	0.480617	0.085302	-
MSTRG.11090.1	0.321973	0.115223	0.179345	0.644831	0.607732	0.235683	0.259692	0.669619	5.31225	-
MSTRG.11090.3	1.09735	1.9162	1.50134	2.0325	1.36346	4.37277	1.53459	1.58312	1.29034	-
MSTRG.11091.1	22.324	22.6809	24.4366	28.0754	26.6543	28.1889	21.5307	24.9699	23.7984	-
MSTRG.11092.1	0.027872	1.65232	3.16574	0.095577	12.1177	1.77775	0.162988	0.071209	0.045953	-
MSTRG.11096.4	1.06156	4.48051	5.23077	28.4928	2.80718	13.1918	1.23628	3.38463	3.82681	-
MSTRG.11098.1	0	2.11277	2.70637	0.004035	11.3237	2.04186	0.133541	0.009574	0.042497	-
MSTRG.11105.1	1.20058	1.68093	3.30371	6.54625	4.31249	7.81292	1.58848	2.17448	2.31733	-
MSTRG.11106.3	2.35877	0.414287	0.532673	0.883926	1.70385	1.22821	1.92702	0.731753	2.64668	-
MSTRG.1111.1	24.5832	29.7883	32.7861	131.402	124.732	26.2954	34.3296	52.797	50.1439	-
MSTRG.11110.1	1.64124	3.65791	3.40656	1.20585	2.27969	0.845266	1.42774	2.36916	3.50137	-
MSTRG.11111.1	0.388471	0.421232	0.73853	4.1145	2.56012	2.15987	0.46218	0.728401	0.622495	-
MSTRG.11112.1	1.87626	0.966426	1.40011	0.333727	0.178584	1.34155	1.6741	0.812766	0.81093	-
MSTRG.11122.1	0.269454	0.549586	0.50105	0.188537	3.13326	0.339419	0.412805	0.202024	0.143084	-
MSTRG.11126.4	1.91741	2.85237	3.13248	5.52163	2.25178	10.9066	3.35667	1.3547	2.78331	-
MSTRG.11126.5	1.76068	0.015441	0.005398	0.026088	0.016413	0.190171	0.029025	0.001477	2.12473	-
MSTRG.11127.1	0.083908	1.25886	0.981882	1.08583	2.04213	2.60442	0.087784	0.089048	0.578064	-
MSTRG.11128.1	2.41294	2.27336	2.72857	4.31202	3.2233	2.61639	2.88825	3.0778	2.90405	-
MSTRG.11130.2	1.09685	0.913344	1.11724	1.77246	1.75787	2.42105	1.16746	1.7841	1.46473	-
MSTRG.11130.3	1.86675	2.56716	2.03572	1.23321	1.79299	0.622085	2.09976	1.48442	1.60563	-
MSTRG.11130.4	0.860439	1.19422	1.29835	1.60879	1.01756	1.48538	1.38413	1.08164	1.56775	-
MSTRG.11133.1	1.2383	1.459	0.940609	2.25943	2.92088	2.64787	1.18234	1.89989	1.74734	-
MSTRG.11134.1	3.73756	0.827714	0.453666	3.5994	1.44582	3.8701	3.21868	4.00804	2.86177	-
MSTRG.11134.2	3.6255	1.60076	1.01189	2.17255	2.41895	1.73934	1.87344	2.33715	1.41183	-
MSTRG.11147.1	1.08238	0.7928	0.991309	1.11894	1.27593	1.74178	1.85954	1.36688	1.37172	-
MSTRG.1115.1	12.6275	9.71694	10.9546	1.93432	0.478116	1.3621	1.28532	2.03416	3.69392	-
MSTRG.11157.2	0.099394	0.942275	1.28787	0.882953	1.18318	1.78529	0.075259	0.758201	0.556823	-
MSTRG.1116.1	5.92086	11.2722	14.0464	26.3406	21.0244	17.3265	6.53321	11.1399	13.75	-
MSTRG.11161.1	3.02439	1.85949	1.92028	2.47797	2.67742	1.70224	1.30517	1.49642	4.7443	-
MSTRG.11161.2	2.0677	3.93636	4.76534	4.07107	5.85576	6.78641	3.90198	4.3907	2.76422	-
MSTRG.11161.5	0.384311	0.470261	1.42043	0.273344	0.039077	1.71815	0.061756	0.218301	0.334776	-
MSTRG.11167.1	0.935563	1.01929	0.779152	0.483915	0.83495	1.68584	0.970638	0.639333	0.622301	-
MSTRG.11178.2	10.1787	9.29321	9.59249	8.31444	8.79184	10.7009	11.685	13.55	10.5247	-
MSTRG.11178.3	11.4103	11.3799	4.64447	10.3359	10.2681	15.4224	8.55267	9.82456	14.3939	-
MSTRG.11178.4	8.90893	10.9123	9.71945	6.03081	4.38564	6.89247	7.07956	8.04073	8.14797	-
MSTRG.11178.5	1.37546	1.0941	7.78876	19.9398	12.5263	10.6276	7.21875	11.6998	5.02073	-
MSTRG.11178.6	8.87056	8.65889	10.2026	8.68726	11.9579	7.69141	8.71671	7.54698	8.36774	-
MSTRG.11187.1	2.45206	2.26554	3.27745	2.62436	1.81401	2.29355	3.04408	2.73193	2.49344	-
MSTRG.11192.1	0.500602	0.133792	0.140817	1.44809	1.68214	1.15556	0.41198	0.384007	0.317363	-
MSTRG.11193.1	0.455701	0.627731	0.470021	0.617906	0.858418	2.4115	0.776003	0.619348	0.662883	-
MSTRG.11195.1	0.902027	0.663532	1.2177	2.52571	1.70045	2.64511	1.44263	1.90954	1.7887	-
MSTRG.11199.1	3.10752	3.79794	4.03472	5.85594	5.02041	3.69611	3.56875	4.04482	4.40209	-
MSTRG.11200.2	2.35873	1.28038	1.59093	1.6857	1.38034	0.620544	1.42239	1.48564	1.51064	-
MSTRG.11200.5	0	0.506057	1.02156	1.03841	0.352715	0.975385	0.48172	1.72239	1.30208	-
MSTRG.11201.2	0.342413	1.56035	0.300747	0.685774	2.01129	0.949787	0.368299	1.00994	0.284969	-
MSTRG.11205.1	24.0032	42.2678	49.0904	26.9715	18.3429	34.7555	24.0863	31.9287	31.1325	-
MSTRG.11211.1	0.608086	0.454027	0.378871	0.610457	0.959342	1.37409	0.499168	0.641291	0.420433	-
MSTRG.11219.1	8.64951	9.67364	7.25612	3.26031	2.7746	2.08789	6.26387	4.29255	4.18904	-
MSTRG.11219.4	4.21789	5.96807	8.46441	0.367164	41.8113	3.37712	3.4646	1.59732	0.226801	-
MSTRG.11219.7	0.508522	0.044478	1.07116	3.37182	0.05382	0.064593	0.023324	0.131659	0.164617	-
MSTRG.1122.1	151.234	159.419	135.774	108.951	70.6566	97.8921	220.093	206.774	178.439	-
MSTRG.11220.1	4.15551	3.92793	3.83973	4.57559	4.19461	1.54008	3.66161	3.94725	4.59301	-
MSTRG.11224.1	0.320326	1.01026	1.026	1.55034	4.10882	3.59581	0.70405	1.36651	0.740261	-
MSTRG.11228.1	0.531168	0.490425	0.431706	1.11652	1.0512	2.17298	0.663497	0.88018	0.953282	-
MSTRG.11229.2	0.975428	0.711457	1.13742	1.22978	2.32414	2.79323	1.14549	1.63345	1.44213	-
MSTRG.1123.3	1.6647	0.430815	0.198697	2.83705	2.53853	3.89111	1.91766	1.9793	1.5753	-
MSTRG.11234.1	0.770491	0.367714	0.228373	0.487031	0.298541	0.477511	1.46107	0.614717	0.483607	-
MSTRG.11235.1	17.1904	22.8596	22.6048	10.9493	7.6175	13.1251	19.6967	21.1213	18.842	-
MSTRG.11239.1	0.401584	1.02329	0.245644	2.52714	4.39355	1.40857	0.692508	0.839805	0.72223	-
MSTRG.11239.3	1.2761	1.57405	0.005834	0.918198	3.0866	1.77287	0.617149	1.33138	0.269395	-
MSTRG.11239.4	2.65322	1.31698	3.65325	0.114803	0.936533	0.10356	0.340054	4.44271	5.49347	-
MSTRG.11240.1	4.64386	4.89773	6.22089	5.53503	6.24329	6.31578	2.71802	3.14593	3.32538	-
MSTRG.11241.1	1.1326	1.80456	1.95489	3.14334	2.37362	1.83633	1.94573	2.50779	2.52085	-
MSTRG.11243.1	0.622013	0.81202	0.708013	0.024957	1.92246	0.468238	0.618558	0.253466	0.166524	-
MSTRG.11248.2	0.480043	0.011963	0.20869	1.61877	1.7611	1.92728	0.300869	1.51686	0.378366	-
MSTRG.1125.1	35.3894	37.188	33.8222	9.55943	7.59532	17.2183	23.8268	17.7547	20.3961	-
MSTRG.1125.2	15.9018	13.7268	22.6507	11.3381	13.9576	20.7449	16.0117	13.8908	15.8844	-
MSTRG.1125.3	3.40261	2.25027	8.45749	1.35199	2.57903	2.33253	4.53606	6.3077	3.11487	-
MSTRG.11250.1	0	1.9916	0.892506	0.04751	6.73136	0.505042	0.045317	0.100213	0.050042	-
MSTRG.11252.2	0.064993	4.70277	3.53837	0.237238	23.0931	2.03801	0.110868	0.013314	0.032141	-
MSTRG.11253.1	0.038695	1.67523	1.89083	0.136282	6.83071	0.740423	0.018199	0.049792	0.041012	-
MSTRG.11254.1	1.71444	5.77273	6.15068	12.1108	8.11864	7.43559	4.18177	6.16075	6.90867	-
MSTRG.11254.2	6.00151	12.3622	7.79291	8.46612	9.23	6.81379	4.69088	7.34225	8.82014	-
MSTRG.11258.1	2.67204	3.55785	4.81224	1.09838	2.54472	3.91953	1.73692	1.60521	1.34356	-
MSTRG.11259.2	4.52973	2.7101	2.17571	2.67246	1.84763	4.57154	4.67924	5.40956	4.01205	-
MSTRG.11259.3	1.06635	1.15469	0.68433	0.67515	2.44268	0.592517	0.72047	0.416315	1.619	-
MSTRG.1126.1	0.927137	2.07753	1.05421	0.507861	0.303863	2.96168	2.42891	3.0096	0.844833	-
MSTRG.1126.2	0.26721	0.133245	0.280908	0.430536	0.307314	2.30982	0.366007	0.024149	0.436066	-
MSTRG.11262.5	7.91485	9.19715	23.5585	4.20474	4.81008	12.6804	28.479	18.6314	18.3847	-
MSTRG.11263.1	0.165143	0.653592	1.42497	0.115082	2.74102	0.466279	0.577493	0.651599	0.424974	-
MSTRG.11268.1	0.106342	4.31834	6.04927	0.448389	28.4601	3.08861	0.352975	0.455004	0.194888	-
MSTRG.11273.1	2.38823	1.88572	1.77683	1.98595	2.39183	3.41505	2.0308	2.73358	1.97207	-
MSTRG.11275.1	0.174919	1.52706	1.74344	0.195573	6.57724	1.06113	0.177589	0.195122	0.409513	-
MSTRG.11277.1	1.54641	1.22958	1.03999	1.06787	0.883901	1.13498	1.65075	1.79491	1.53546	-
MSTRG.11280.1	17.9643	25.7998	17.7004	25.7158	21.0273	18.8423	36.8971	36.4796	27.3385	-
MSTRG.11291.1	0.499482	1.80815	0.694796	0.14112	3.94368	0.265261	0.169823	0.297793	0.148768	-
MSTRG.11297.2	1.73888	2.37802	2.50403	2.97725	0.766552	3.23477	1.79685	2.35834	2.94171	-
MSTRG.11297.3	23.2679	27.4124	18.6723	11.8932	14.278	28.6842	36.9013	31.0582	30.979	-
MSTRG.11297.4	11.5988	13.9032	10.0937	4.28268	6.11921	8.08125	24.7726	16.5782	17.0513	-
MSTRG.11298.1	5.313	9.28609	7.22074	2.46391	2.19204	2.48728	9.03434	8.56613	8.26667	-
MSTRG.11312.2	1.05581	0.038135	1.8894	0.02398	0.130805	0.110774	1.50705	1.83217	0.103089	-
MSTRG.11313.1	0.148785	4.03041	5.06392	0.106696	17.1744	3.32986	0.654731	0.327943	0.554343	-
MSTRG.11314.1	0.200843	1.79915	1.50919	0.888933	4.54355	0.788928	0.301707	1.15177	1.44463	-
MSTRG.11318.1	0.169504	0.612574	2.82205	0.197906	0.39277	2.02475	0.02748	0.116165	0.044424	-
MSTRG.11319.2	0.125517	0.527175	0.443202	0.270796	1.93958	5.78477	0.271117	0.324748	0.19838	-
MSTRG.1132.1	0.105308	2.00489	0.347069	12.2744	12.1686	6.39113	0.101075	0.779149	2.62237	-
MSTRG.11324.1	6.94	6.12765	6.8415	4.71879	5.03885	7.4775	5.79501	5.99002	5.61768	-
MSTRG.11325.3	0.006418	0.098899	0.046715	4.03659	0.022422	0.025446	1.29953	4.10171	2.7587	-
MSTRG.11330.1	4.14822	0.999982	1.17295	0.251436	0.700243	0.022416	3.04496	2.37088	2.51409	-
MSTRG.11330.2	3.48023	2.30828	2.41949	0.982299	0.743542	6.65058	1.87022	2.70198	2.62732	-
MSTRG.11331.1	0.255844	0.174739	0.331468	0.108098	0.871917	3.25726	0.324826	0.484662	0.073524	-
MSTRG.11336.1	0.191112	0.452322	0.797986	0.869267	1.4312	2.76317	0.373634	0.662225	0.503672	-
MSTRG.11338.1	1.27335	1.20447	2.15605	1.17701	0.554887	1.21447	1.34027	1.74955	1.80424	-
MSTRG.1136.1	3.28972	4.3647	6.33427	4.87261	2.99735	6.84367	3.95392	4.32142	5.2804	-
MSTRG.1136.2	64.094	79.1672	25.2848	33.1994	6.38852	65.748	10.3069	54.4136	80.4894	-
MSTRG.1136.3	3.82737	2.07589	4.85186	3.09709	3.50773	9.21588	0.674061	1.4056	2.01211	-
MSTRG.11361.1	0.015043	1.16945	0.676753	0.010357	7.53187	0.355754	0.046795	0.034873	0.00991	-
MSTRG.11365.1	10.5074	1.84545	8.3185	8.10436	4.41143	11.6834	7.11082	9.71416	9.69289	-
MSTRG.1137.1	1.19472	1.71304	2.00035	4.61427	1.30084	0.557911	1.42581	0.058763	0.946074	-
MSTRG.11379.1	1.42877	1.4483	1.41045	0.563404	1.11678	1.63622	2.07692	2.52532	1.42201	-
MSTRG.11380.1	0.898877	0.669039	0.540341	0.626086	1.56883	2.31281	0.93773	0.748186	0.632194	-
MSTRG.11384.1	0.427337	0.245189	0.258454	1.32752	2.04867	1.49747	0.537651	0.384905	0.433838	-
MSTRG.1139.1	0.057611	0.181507	0.142223	0.021061	0.027766	1.15194	0.107405	0.129008	0.371896	-
MSTRG.1139.2	1.65217	4.59375	1.64351	1.52112	6.47373	1.65071	2.12242	2.44693	2.26764	-
MSTRG.114.1	2.45612	1.75124	2.62664	4.27661	2.14344	3.01818	2.58098	2.35213	2.42973	-
MSTRG.1140.1	1.04005	1.1024	3.13536	0.511591	2.14456	3.6588	1.38192	1.5354	1.93584	-
MSTRG.11400.1	0.185038	0.026523	0.43034	0.155815	0.818921	1.73053	0.07431	0.174189	0.164116	-
MSTRG.11404.1	0.970422	1.81968	1.07652	1.44103	0.703053	1.48876	0.755301	1.21115	1.20318	-
MSTRG.1141.1	5.4662	6.50771	2.12052	7.45299	15.436	10.9452	6.15026	8.96909	6.32742	-
MSTRG.11411.1	0.434876	1.62111	0.828386	0.573677	0.581122	1.69656	0.438682	0.396118	0.643217	-
MSTRG.11414.1	1.71882	2.00269	1.99173	1.4162	1.75424	1.27232	2.66917	2.174	2.51863	-
MSTRG.1142.1	0.029689	4.15649	0.11226	0.019274	0.000953	0.133776	0.050476	2.85747	2.77784	-
MSTRG.1142.10	45.2895	37.0684	44.923	44.7443	44.2709	69.3602	55.9478	48.5418	54.8039	-
MSTRG.1142.2	0.956195	1.09366	3.51436	2.61081	0.955722	2.58085	1.94284	0.904813	2.43166	-
MSTRG.1142.4	1.25299	2.45743	0.050021	0.720571	0.396407	0.254308	0.699053	1.39534	1.75372	-
MSTRG.1142.7	2.99046	0.558123	0.27829	0.252361	0.313433	3.38846	2.07225	0.599982	0.387192	-
MSTRG.1142.9	4.307	3.27902	1.56586	0.908856	0.645255	1.92702	2.39008	1.07497	1.53623	-
MSTRG.11421.4	21.5614	14.8286	13.1632	16.0025	14.6954	22.8303	19.7428	20.2216	19.8343	-
MSTRG.11422.1	9.77819	8.0176	4.61809	5.40758	3.78234	5.27915	10.8357	8.18953	8.31914	-
MSTRG.11423.1	0	5.17964	7.81822	0.121124	21.4557	3.09691	0.166473	0.257696	0.128313	-
MSTRG.11426.2	0.380544	1.79537	1.79837	0.564879	5.7209	1.23331	0.977233	0.600056	0.718962	-
MSTRG.11432.2	0.785708	0.995421	2.93331	2.22197	1.78258	3.09844	1.14257	2.48131	2.20681	-
MSTRG.1144.1	0.481031	1.24937	2.32141	0.163579	2.91963	1.14851	0.395013	0.043041	0.145164	-
MSTRG.11445.2	17.6987	15.1436	12.0985	10.3803	7.7413	6.04583	10.7874	9.11913	9.3718	-
MSTRG.11448.1	0.841498	0.468776	7.81075	4.45747	16.7032	31.9884	0.655985	0.958516	0.943157	-
MSTRG.11449.1	0.387548	0.490584	0.617286	1.72021	2.0701	0.939491	0.25524	0.447164	0.670309	-
MSTRG.1145.1	3.44224	0.708891	0.803088	4.56265	0.862497	0.533996	1.32049	0.752739	1.46859	-
MSTRG.1145.2	0.738324	0.14645	1.42289	0.545254	0.162481	0.010647	1.08328	1.24017	1.15254	-
MSTRG.1145.3	4.75615	0.639361	0.690132	1.54767	0.870111	0.504805	0.959139	0.625829	1.17881	-
MSTRG.1145.5	0	3.97853	2.87269	0.604383	1.16452	3.61048	3.39675	5.31503	1.88746	-
MSTRG.11450.1	0.027574	0.242432	0.535557	0.26288	2.83488	0.695954	0.067133	0.100488	0.07265	-
MSTRG.11455.1	2.2289	1.49601	1.95138	2.93597	8.62729	6.41998	2.88677	3.5785	0.717914	-
MSTRG.11455.4	1.6593	2.05099	1.97214	2.68112	2.51136	0.744883	1.72241	2.37486	0.873083	-
MSTRG.11456.1	4.61255	1.94783	1.2543	2.49297	1.13607	2.15514	2.56137	2.71753	3.95911	-
MSTRG.11456.2	0.225385	0.425952	0.39149	1.1787	0.420047	0.636447	0.576474	0.425704	0.395325	-
MSTRG.11457.2	1.64871	1.43681	1.15542	2.44033	6.51505	3.18636	3.18937	4.04289	3.73371	-
MSTRG.11458.1	6.71419	6.47755	5.62279	3.43391	4.0633	4.33185	4.423	4.89304	5.23508	-
MSTRG.11469.1	0.036032	0.009504	1.75846	0.08085	0.050543	6.95639	0.072367	0.482543	0.522503	-
MSTRG.11478.1	0.02236	3.71026	6.85419	0.049717	18.4166	3.64003	0.163641	0.184381	0.028381	-
MSTRG.11485.1	5.466	5.52395	4.77695	5.80783	4.78024	4.77389	5.44988	5.53831	5.40357	-
MSTRG.11490.1	1.07582	1.11793	0.982404	1.1809	0.577208	1.06444	1.56772	1.29196	1.2474	-
MSTRG.11491.3	0.553725	0.306084	3.0573	0.43257	5.33197	0.316315	0.260297	1.5841	1.26991	-
MSTRG.11491.4	1.55057	0.428845	1.6415	0.481181	1.73273	0.322365	0.286685	1.28227	0.89814	-
MSTRG.11491.7	0.897894	3.12332	2.11923	4.86536	2.3835	2.05483	0.922209	1.50638	0.949812	-
MSTRG.11494.1	1.59275	1.49613	1.01351	1.38288	0.816525	1.46459	0.949774	0.678291	1.60888	-
MSTRG.11496.1	11.3955	11.7706	11.5316	16.9425	12.4267	2.23952	10.0516	10.4183	12.2969	-
MSTRG.11497.1	0.49228	1.74858	0.400994	1.78318	0.486065	21.2244	3.29597	11.7075	0.377784	-
MSTRG.11502.1	0.002829	4.30322	3.97839	0.101764	16.7777	2.07768	0.089449	0.147725	0.002999	-
MSTRG.11505.1	20.4613	2.19668	13.088	1.85614	2.30745	0.001379	0.003153	21.1678	0.015713	-
MSTRG.11510.1	0	1.73767	2.489	0.289148	10.3887	1.16907	0.050145	0.11089	0.16612	-
MSTRG.11515.1	0.209122	1.74734	0.156028	0.054165	2.82236	0.100487	0.238045	0.307192	0.166305	-
MSTRG.11521.1	2.75396	1.91558	2.57298	1.8009	1.36492	1.76382	2.68671	2.28924	2.63871	-
MSTRG.11525.1	1.23355	0.772356	0.706348	5.65116	6.43261	6.67961	5.11124	5.83872	0.016295	-
MSTRG.11526.1	0.015114	2.49857	4.2945	0.040199	14.3217	1.96158	0.043737	0.014669	0.008049	-
MSTRG.11533.1	10.8172	12.2424	9.85162	18.4463	16.732	18.3797	13.83	16.9493	15.8342	-
MSTRG.11536.1	0.432323	4.78716	7.61948	2.12751	24.3918	5.83727	0.227679	0.943616	0.979349	-
MSTRG.11537.2	0.797406	1.50061	1.06568	0.262035	4.45441	0.382117	0.175938	0.77266	0.990818	-
MSTRG.11538.1	1.56701	1.35185	1.48421	2.08119	2.21272	1.53843	1.92863	1.01265	1.76714	-
MSTRG.11543.1	0.857045	1.13712	0.856721	2.73126	3.39581	1.21885	2.14413	2.69242	2.6025	-
MSTRG.11546.1	0.063526	1.80756	0.426507	0.404639	3.65105	0.356167	0.060973	0.031012	0.127927	-
MSTRG.11547.1	0.712375	1.41882	0.482324	0.47899	4.29302	0.594287	0.531695	0.160116	0.486488	-
MSTRG.11548.4	1.89129	2.56241	0.627818	2.97324	0.295649	0.12321	1.45939	0.728081	1.37716	-
MSTRG.1155.1	1.55431	0.578796	2.03181	5.28556	3.3649	5.04294	2.63081	1.72399	1.16867	-
MSTRG.11550.1	0	0.189007	0.019415	0.922677	1.09085	1.84559	0.24743	1.32641	0.772445	-
MSTRG.11553.1	1.09777	1.15482	6.58662	13.7194	4.28942	3.48941	0.279925	0.02759	4.43462	-
MSTRG.11553.4	3.38388	0.183778	5.15026	4.59248	3.12035	4.0164	0.591428	1.32947	1.07618	-
MSTRG.11554.1	0.446891	4.75433	2.61356	1.3185	24.2437	2.21914	0.629099	0.598841	0.535543	-
MSTRG.11556.2	2.5257	2.83392	1.59376	0.036517	1.49538	3.73005	3.75441	3.23749	3.54706	-
MSTRG.11559.1	0.106019	4.32525	7.17673	0.415	15.6358	3.02155	0.374217	0.470589	0.614372	-
MSTRG.1156.1	2.42818	3.10966	13.7624	4.64269	10.9119	1.08649	2.72122	1.86976	2.14795	-
MSTRG.11562.1	0.157197	2.00697	0.802009	5.70526	4.62951	5.23935	4.13222	3.34263	1.79743	-
MSTRG.11563.1	21.8819	33.0295	27.7581	35.7362	46.5491	79.8803	31.4284	41.3929	34.038	-
MSTRG.11563.2	1.63675	2.65613	1.17119	1.61617	1.73188	2.54998	3.69584	0.902987	2.70815	-
MSTRG.11567.1	0.909574	0.704022	0.035175	0.229614	2.4043	0.63096	0.481141	0.156891	1.0765	-
MSTRG.11567.2	1.26083	0.044816	0.439834	3.20477	1.165	4.21545	2.08011	1.05168	1.37139	-
MSTRG.11575.1	0.986576	0.776707	0.61976	0.89836	1.82661	1.32696	0.84959	1.2465	1.33086	-
MSTRG.11583.1	9.68859	7.22206	8.18677	10.3577	8.65034	6.84638	6.9921	8.52103	3.84537	-
MSTRG.11583.6	0.392361	0.273895	0.189994	0.340421	0.390663	2.71873	0.384856	0.398762	0.328872	-
MSTRG.11589.1	19.2728	17.7286	13.7539	24.8825	16.7386	31.981	22.5776	20.789	20.504	-
MSTRG.11589.2	2.07321	2.89209	3.19271	6.31694	8.3927	2.19324	2.87468	3.72974	3.53706	-
MSTRG.11590.1	0.164328	2.02099	1.52429	0.232788	5.77479	1.20468	0.248858	0.263099	0.192237	-
MSTRG.11591.1	0.836335	1.62349	2.10067	0.954754	0.947249	1.38135	0.572922	0.556152	0.450679	-
MSTRG.11592.1	1.44592	0.711439	0.545587	0.562188	0.583294	0.099972	0.839622	0.511496	0.930568	-
MSTRG.11593.1	8.75348	6.2372	5.43147	9.06569	7.86213	5.31175	10.917	14.6151	14.5189	-
MSTRG.11608.1	16.5128	13.7161	12.2729	16.7873	15.1035	12.9872	22.9962	24.1585	17.0196	-
MSTRG.11609.1	10.3109	9.74945	9.13284	6.10728	1.21312	4.18918	10.7909	9.12549	10.8391	-
MSTRG.11609.2	2.75114	0.88148	0.715082	0.775298	1.43621	0.471619	0.799186	1.43119	0.710796	-
MSTRG.11615.2	0	1.01029	1.09104	0.35048	4.76919	0.756811	0.205813	0.326373	0.473613	-
MSTRG.11618.1	0.209041	10.4517	8.22716	3.84342	20.7206	7.46483	0.33397	1.09363	3.40897	-
MSTRG.11618.4	3.12121	10.0897	8.99382	5.26894	9.55185	16.9796	2.74195	3.72407	3.04837	-
MSTRG.1162.1	5.56086	6.62912	5.82385	6.58761	7.89748	11.8699	7.34726	5.81646	6.41918	-
MSTRG.1162.2	39.5421	30.9391	30.5116	36.953	26.566	26.8357	41.9699	36.8719	35.7793	-
MSTRG.11623.1	2.14107	2.13719	2.59956	3.61831	2.79791	5.72251	5.62782	2.81857	1.47232	-
MSTRG.11623.3	7.56523	0.24094	9.99648	18.8464	18.3555	0.863127	8.5913	12.2538	22.8161	-
MSTRG.1163.1	1.19934	0.083389	8.99254	13.7333	7.79728	4.17206	1.47015	8.2892	1.7917	-
MSTRG.1163.2	0.769404	6.4912	3.04144	1.34138	2.63973	3.80861	1.0961	2.63941	1.12425	-
MSTRG.1163.5	0.568033	5.77654	0.864694	1.55358	3.0191	9.12947	0.845312	3.37715	0.986734	-
MSTRG.1164.1	0.023055	9.5034	0.03048	7.60624	0.029609	5.41688	8.67015	11.9552	0.032216	-
MSTRG.1164.2	7.86599	3.24592	10.3015	3.85736	5.24509	4.12936	3.85433	3.17842	11.3235	-
MSTRG.11640.1	4.31589	0.069181	6.19374	0.026029	0.065472	6.01032	2.40626	5.21832	0.004557	-
MSTRG.11645.2	2.06404	2.30401	1.77796	4.09514	3.31903	2.92268	2.50827	3.17995	3.08394	-
MSTRG.1165.1	8.16067	10.9443	9.13606	11.4047	9.34428	16.5749	8.80538	8.55937	8.19692	-
MSTRG.11650.1	7.13742	10.2673	8.88892	6.1365	4.31215	6.33758	11.0377	10.4265	10.9963	-
MSTRG.11657.1	9.90179	8.19619	8.09817	15.7483	12.6386	12.8147	13.9346	15.5593	16.2012	-
MSTRG.11661.2	0.827667	0.871316	1.41235	2.43976	2.10896	0.110292	0.088219	1.39455	1.9951	-
MSTRG.11667.1	0.336536	2.4761	3.48677	1.62908	1.60649	0.404431	1.04013	2.28078	1.44079	-
MSTRG.11669.1	9.66535	12.0266	18.6424	3.96048	3.69462	6.10349	11.5712	9.61519	11.6376	-
MSTRG.1167.1	1.67085	2.10299	0.433047	1.24731	1.37719	2.25976	1.84826	1.61061	1.35319	-
MSTRG.11677.1	4.36978	3.48033	3.38172	5.12689	2.03166	1.3597	4.13861	4.89617	5.44807	-
MSTRG.11677.2	0.053448	0.198074	0.101757	1.81875	0.178046	1.80258	0.7902	1.06269	0.168891	-
MSTRG.11677.4	2.67559	5.70572	4.93845	9.17092	4.29798	1.25381	6.59264	9.04674	9.15622	-
MSTRG.11678.1	0.696412	0.940785	1.43516	2.50216	0.697422	0.203061	1.26769	2.05228	2.2874	-
MSTRG.11680.2	0.204349	0.771439	0.160448	2.03844	0.878678	0.379356	0.300368	0.322719	0.364546	-
MSTRG.11680.3	1.5872	1.75399	3.5908	3.44945	8.43189	3.92791	1.29327	3.31218	3.31415	-
MSTRG.11681.1	0.896559	0.790776	0.780854	2.82517	1.02776	0.903746	1.49529	1.71011	1.65438	-
MSTRG.11686.1	0.463236	0.347461	0.134197	1.7431	2.08618	3.2473	0.228561	0.747587	0.743912	-
MSTRG.11686.2	0.228033	0.86898	0.328895	0.392272	4.03715	0.426885	0.231554	0.11227	0.358729	-
MSTRG.11693.10	0.632037	6.32244	0.644209	3.65248	1.00926	13.1581	0.96209	0.713989	8.16653	-
MSTRG.11693.13	0.481687	1.18017	0.340641	1.37858	0.279438	1.80414	0.355484	0.439219	1.1505	-
MSTRG.11693.3	3.37646	2.7403	1.34724	5.17653	5.01209	5.64282	3.07478	3.67108	6.49218	-
MSTRG.11693.6	2.31652	2.26087	1.17684	2.9922	6.25696	2.50772	2.74085	1.87229	1.55507	-
MSTRG.11693.8	0.219849	3.70898	0.26426	4.32171	0.314469	17.8194	0.258386	0.346278	0.899454	-
MSTRG.11693.9	0.723319	1.86441	1.96616	3.02471	1.58713	3.48583	1.51729	1.62487	1.35559	-
MSTRG.11695.1	6.71689	4.86079	4.04763	10.9196	11.486	5.19027	8.1068	8.75787	7.888	-
MSTRG.11696.1	12.7842	15.1905	19.7533	19.9342	20.0979	16.9648	14.0844	15.5108	16.3209	-
MSTRG.11697.1	8.13835	10.8275	10.5565	25.0332	23.1039	25.8967	8.80063	12.4911	13.2204	-
MSTRG.11698.1	0.092181	1.6333	2.00402	0.63049	5.08535	1.09345	0.052358	1.04203	0.335076	-
MSTRG.117.1	9.17553	11.2615	10.4232	18.5139	15.3599	19.121	10.5325	13.0667	12.5306	-
MSTRG.11702.3	0.672148	0.71578	1.91659	2.01457	4.88341	1.53498	1.69008	0.789018	0.999039	-
MSTRG.11702.9	0.862372	0.97602	0.3488	2.47438	0.43048	0.143824	0.100422	0.683429	2.83175	-
MSTRG.11708.1	0.249168	0.312463	0.521744	0.397102	1.70783	0.662105	0.34128	0.510282	0.351524	-
MSTRG.11713.3	20.0382	5.54718	13.786	25.2742	5.3373	2.93734	23.862	6.52611	24.7321	-
MSTRG.11714.1	1.8238	1.64912	3.52715	0.700994	1.52841	0.949705	1.92745	2.03671	1.68014	-
MSTRG.11720.1	2.27885	3.15757	2.91404	5.54814	0.881802	0.531279	3.93915	4.55908	4.58981	-
MSTRG.11720.2	0.058015	0.040432	0.085867	0.032435	5.45821	0.013176	0.050526	0.054645	0.019405	-
MSTRG.11721.1	13.5296	20.8781	24.6441	14.4917	5.77198	7.81116	9.7363	14.2304	19.8307	-
MSTRG.11723.2	7.49285	5.57688	1.93538	1.10329	32.4182	16.0512	6.32238	11.7957	9.84125	-
MSTRG.11734.1	4.20006	11.3588	15.9014	11.2004	6.93522	20.0484	3.65879	5.68149	9.47949	-
MSTRG.11745.1	1.09601	6.61915	6.31003	1.50775	10.3105	9.66151	6.39064	1.3593	1.2048	-
MSTRG.11748.2	18.5247	20.6342	16.8287	13.1858	10.9593	10.8149	8.64072	9.68177	11.0947	-
MSTRG.11748.5	22.6635	30.2908	29.6924	29.1815	26.2393	34.8053	19.6692	20.1853	23.8209	-
MSTRG.11749.1	6.81286	10.5512	11.4615	6.92149	16.6536	11.995	6.71063	9.71455	12.3616	-
MSTRG.11749.3	3.96402	2.4794	3.47016	3.79817	0.356848	1.2469	6.285	4.82088	4.1391	-
MSTRG.11750.2	1.24588	3.57621	1.8813	1.68402	4.8553	4.35506	0.438074	0.222428	1.05835	-
MSTRG.11752.2	68.5865	1.69509	58.5939	2.84389	1.34451	0.704632	23.3422	0.358014	1.0706	-
MSTRG.11752.3	2.6602	1.50002	1.17535	2.6293	0.115404	75.4278	1.96875	1.24423	1.38211	-
MSTRG.11752.4	0.18782	57.3831	0.034199	0.264712	2.40305	0.043311	0.037744	0.02367	0.052538	-
MSTRG.11754.1	11.1583	10.7716	1.25075	13.1917	10.3935	7.59808	11.9011	11.5934	1.94079	-
MSTRG.11755.1	0.229394	2.23255	4.67927	0.752276	12.7811	2.11517	0.410883	0.392168	0.260002	-
MSTRG.11756.2	0.734425	0.793651	0.624098	1.00112	1.07139	1.0334	0.634771	0.618294	0.517462	-
MSTRG.11756.3	0.4882	0.633919	0.080832	2.23186	0.611151	1.51316	0.231941	0.086786	0.181891	-
MSTRG.11756.5	2.96555	3.37592	3.62136	1.25768	0.899901	1.89779	2.55487	2.40983	3.99215	-
MSTRG.1176.2	3.02919	4.23114	2.37794	4.21538	3.9501	3.71221	2.47936	3.18954	3.30974	-
MSTRG.11761.2	0.032666	0.5394	0.466189	0.329851	1.76084	0.379463	0.410324	0.577298	0.403561	-
MSTRG.11764.1	4.81696	4.201	3.65465	3.57191	2.66056	2.7095	5.57551	6.33897	4.60069	-
MSTRG.11765.1	0.368907	0.813285	0.071948	2.25924	2.67832	2.9324	1.27469	2.19243	1.65353	-
MSTRG.11766.1	15.9769	10.6935	13.4802	19.2932	17.7114	21.0115	11.5063	13.3413	22.1818	-
MSTRG.11769.1	5.39813	5.82037	12.7454	2.95863	1.81252	7.53475	6.27771	3.83799	3.27289	-
MSTRG.11782.1	0.018133	3.74327	3.78478	0.018246	19.7596	1.74736	0.129312	0.173191	0.038437	-
MSTRG.11794.1	5.1962	6.64054	7.56195	10.6009	10.3102	9.80531	9.39235	11.8579	9.642	-
MSTRG.11794.2	5.19689	4.80983	5.19157	7.62651	2.97348	1.62492	4.15953	6.0559	10.4398	-
MSTRG.1180.2	111.803	93.516	93.2947	68.8177	78.45	45.4624	129.931	103.32	99.931	-
MSTRG.11804.1	11.6478	10.8449	10.6714	12.2686	14.1624	13.0331	10.0294	9.0093	10.7192	-
MSTRG.11805.1	0.014859	3.52291	4.2921	0.073937	17.2203	2.5696	0.06432	0.218874	0.094491	-
MSTRG.11807.1	0.326893	1.09545	2.03947	0.448716	0.683714	1.24347	0.369124	0.632819	0.357066	-
MSTRG.11809.2	0.954188	1.41669	1.09322	2.30049	0.826026	1.56337	1.98573	1.66656	2.07677	-
MSTRG.11809.3	0.629573	0.580564	0.235988	0.908008	3.66284	0.014869	0.46167	0.360497	0.330898	-
MSTRG.1181.1	3.04284	6.47329	11.9967	21.0821	13.9049	3.20445	7.03904	10.9197	14.158	-
MSTRG.11810.1	84.07	56.9636	52.9552	59.0112	48.0988	37.9632	92.8813	90.0968	62.7233	-
MSTRG.11811.1	15.6714	2.85471	14.8219	13.8929	1.73717	3.72301	1.96074	17.7411	4.27273	-
MSTRG.11811.2	3.33227	17.0114	4.65944	2.85371	12.9375	1.16557	16.0168	0.014566	14.3933	-
MSTRG.11814.14	0.81033	0.052624	0.736333	0.544934	0.871574	1.35326	0.627237	0.79716	1.07883	-
MSTRG.11814.15	1.00468	0.077108	0.878205	0.611093	0.968318	1.44567	0.708755	0.929695	1.31666	-
MSTRG.11814.17	0.541598	0.508095	0.508862	1.41967	0.509052	0.838814	0.233246	0.109093	0.784578	-
MSTRG.11814.19	3.61509	2.37591	2.20892	2.27377	2.39045	3.84224	2.28929	3.50826	3.57396	-
MSTRG.11814.20	2.79636	1.77931	1.86103	1.97379	1.92163	3.3006	1.98753	2.70472	2.82212	-
MSTRG.11814.7	0.08736	0.351769	1.20027	0.11732	0.341903	0.032508	0.241989	0.149649	0.20908	-
MSTRG.11816.1	0	2.60153	2.55276	0.016062	10.3933	2.33828	0.061206	0.0847	0.016495	-
MSTRG.11828.1	2.32205	1.3286	3.60469	2.57403	2.78974	2.09995	2.12901	2.71154	2.37469	-
MSTRG.1183.1	3.30369	1.95749	4.15193	8.41074	10.2167	8.51905	4.95948	3.46909	4.80664	-
MSTRG.11832.1	31.0422	37.9695	55.8633	95.4539	149.788	79.9794	36.8914	44.8834	50.8958	-
MSTRG.11833.1	6.76419	9.25634	17.9187	27.3014	25.414	6.54511	6.79533	9.17275	9.6879	-
MSTRG.11833.3	4.78458	4.08132	6.26027	5.62448	7.91791	3.16357	2.73889	4.1836	6.92682	-
MSTRG.11834.1	52.9941	57.3379	62.3835	70.7505	124.371	30.724	57.702	57.7839	67.27	-
MSTRG.11835.1	22.5595	18.0232	13.7879	18.9296	28.7444	7.52527	12.043	18.9899	21.6671	-
MSTRG.1184.1	3.19887	2.31954	1.49165	1.58098	1.05785	2.45724	3.11912	1.94405	2.31699	-
MSTRG.11842.2	1.80547	13.0386	1.82143	5.51679	1.83078	3.87294	3.56916	2.60598	12.6662	-
MSTRG.11842.3	0.007313	0.006334	0.007047	0.006777	4.89653	0.000987	0.020262	0.013582	0.008861	-
MSTRG.11846.1	1.6958	2.47047	3.02461	3.61864	3.42861	3.95318	3.15729	2.72101	3.59571	-
MSTRG.11847.1	2.18293	2.77571	2.17955	3.17342	1.87868	2.32116	3.79358	3.23939	3.57756	-
MSTRG.11848.1	6.02649	7.14335	7.84849	7.80759	9.42407	9.64136	7.70383	9.60024	7.9486	-
MSTRG.11849.1	12.3404	14.47	11.3068	22.2589	19.9193	20.0996	12.0198	15.187	19.4863	-
MSTRG.11849.4	13.9852	7.85073	10.4242	10.8531	0.018599	0.038252	14.8041	9.47187	6.05186	-
MSTRG.1185.1	1.41282	1.14343	0.893093	1.10006	0.471191	1.44905	2.0543	1.8097	1.9802	-
MSTRG.11854.1	1.06959	0.8807	0.866737	3.40511	1.533	1.37763	1.09676	1.4213	1.70244	-
MSTRG.11857.1	0.513386	1.24386	2.08841	0.962845	10.0312	0.768133	0.85769	1.43294	0.534195	-
MSTRG.1186.1	0.367501	0.942736	0.400959	1.2398	4.42656	0.42222	0.608268	1.05614	0.290435	-
MSTRG.1186.2	6.95002	5.96733	6.33238	6.60158	3.1933	6.88067	8.407	8.39183	8.79899	-
MSTRG.11860.1	17.7827	17.1293	19.7887	23.0915	31.5134	25.1652	18.6588	35.3733	14.5112	-
MSTRG.11862.1	0.656629	3.81148	2.71018	5.85205	12.7241	4.52176	1.28974	2.25164	2.01418	-
MSTRG.11865.1	0.357492	0.248448	0.07591	0.099013	0.963444	1.62841	0.64301	0.568543	0.035699	-
MSTRG.11868.1	8.9	5.56246	5.512	8.71766	8.75096	4.69196	2.48436	3.59501	10.8559	-
MSTRG.1187.1	2.31534	2.25868	3.2589	1.38892	1.17103	1.95378	1.40039	1.42555	1.84088	-
MSTRG.11870.3	1.41777	4.27968	1.51941	0.661573	5.6681	1.36942	1.75111	1.6173	19.4999	-
MSTRG.11870.4	22.0612	12.8836	27.1577	7.57711	3.3663	9.15195	22.6038	16.6636	0.046856	-
MSTRG.11873.10	0.635045	0.764947	0.738434	1.05922	0.323888	2.50765	0.367943	0.214312	0.769753	-
MSTRG.11873.2	0.972279	1.45143	0.884676	1.12264	1.38142	1.52455	0.958289	2.33754	1.32484	-
MSTRG.11873.3	14.2085	7.42164	17.7291	13.1583	5.58733	12.082	8.77255	3.87488	13.0011	-
MSTRG.11873.5	1.0459	1.05963	0.598593	0.854383	0.512677	2.85339	0.703419	0.249791	2.08423	-
MSTRG.11873.6	1.76379	3.12788	0.739161	2.04237	0.203663	0.80707	3.49247	0.189717	0.628533	-
MSTRG.11873.7	3.18506	4.01936	2.45316	2.63108	1.6702	2.62626	2.23106	1.45473	2.49051	-
MSTRG.11874.1	0.442879	0.784059	0.070612	0.786546	0.923766	1.09996	0.545684	0.418697	0.289023	-
MSTRG.11874.2	2.61188	2.23549	5.53377	2.56945	2.83679	3.3472	2.48901	2.55612	2.89076	-
MSTRG.11875.2	1.06442	3.78331	3.23113	0.822941	9.49663	1.23636	1.04586	1.6725	1.06421	-
MSTRG.11878.2	1.32391	6.80025	2.51471	2.95547	20.8022	4.41975	2.52347	3.09856	3.20093	-
MSTRG.11879.1	16.3275	15.2337	5.03399	2.20616	10.6205	3.65901	3.04095	2.3382	3.03376	-
MSTRG.11882.1	7.51962	6.24385	6.80056	8.26754	8.17973	6.12648	8.13481	5.91133	7.15175	-
MSTRG.11882.4	6.71123	10.6305	11.315	16.2842	14.9097	11.8213	12.225	11.2848	13.3135	-
MSTRG.11883.1	15.5207	0.066549	13.8511	18.1864	18.0237	17.9622	0.576076	0.961597	0.589129	-
MSTRG.11883.2	1.48651	1.91769	1.45901	1.03121	1.90859	2.12155	2.58949	3.13114	2.62394	-
MSTRG.11884.1	0.005142	0.337446	1.27867	0.179365	0.231184	0.335699	0.138828	0.129246	0.39184	-
MSTRG.11884.2	0.005025	1.20851	0.09017	1.35954	0.005277	0.551545	0.017909	1.04182	0.005966	-
MSTRG.11884.6	0.143138	2.77357	0.488205	4.10615	0.754097	5.32928	0.754326	2.75995	1.54771	-
MSTRG.11884.8	1.27534	3.94962	2.32977	3.48473	2.24492	5.3489	1.51884	3.87787	3.2098	-
MSTRG.11884.9	0.376696	3.09444	3.01572	1.38978	1.75818	2.81842	0.963352	5.98967	1.23104	-
MSTRG.11886.1	5.57811	0.785024	0.848424	1.0651	4.61253	2.613	7.18738	0.873913	4.91547	-
MSTRG.11886.2	6.15763	1.89439	1.37019	1.65254	3.89008	2.28642	4.37848	2.34125	7.00816	-
MSTRG.11886.3	0.851419	2.12135	8.67549	16.8561	5.159	3.54016	1.21074	10.9921	0.548302	-
MSTRG.1189.1	0.195322	6.80698	9.53201	0.117535	40.337	4.99031	0.107047	0.28958	0.224201	-
MSTRG.11890.2	4.44299	4.82819	3.33342	6.60497	0.495813	0.996459	5.19195	1.43151	1.52506	-
MSTRG.11891.2	1.84116	3.99168	3.21051	3.60646	3.45209	5.92254	2.10908	3.3633	4.21163	-
MSTRG.11892.1	4.03059	4.57355	4.91751	5.79269	3.13517	10.8491	6.50501	2.46057	2.32793	-
MSTRG.11897.1	0.270096	0.032694	0.527215	1.74157	0.712935	1.01242	0.44128	0.616934	0.452897	-
MSTRG.11898.1	10.6202	6.05129	3.1563	2.78844	3.4539	4.43779	9.98875	7.64781	2.74854	-
MSTRG.11900.1	0.212998	1.34132	0.623117	2.08064	1.14839	0.784651	1.12441	1.24325	1.06273	-
MSTRG.11903.2	0.650404	0.188414	0.422077	0.80705	1.66005	0.400293	1.42612	0.920632	0.903759	-
MSTRG.11908.1	0.133652	0.352331	0.789822	0.124058	1.85486	0.143344	0.118151	0.108635	0.137201	-
MSTRG.11911.3	1.07229	3.5115	4.38126	2.64125	0.251107	0.083486	0.395751	3.50093	7.36844	-
MSTRG.11912.1	0.676464	1.03022	0.929252	2.07942	2.73589	3.28709	1.35533	0.924812	1.79324	-
MSTRG.11912.5	0.049684	0.716395	0.637506	1.16621	0.113955	0.103724	0.546929	1.19602	0.087323	-
MSTRG.11913.2	0.654488	0.50622	0.963907	1.70999	1.50334	0.304325	1.96991	0.761926	0.470576	-
MSTRG.11913.3	0.78345	0.345998	0.931554	3.75728	2.63854	0.223809	4.70381	0.666271	0.123667	-
MSTRG.1192.1	2.74439	1.98651	1.15468	5.85498	3.68046	3.09676	2.88228	2.73611	2.36997	-
MSTRG.11920.1	3.33062	1.56286	18.8905	34.2645	34.1429	28.9553	21.8844	28.3826	28.3395	-
MSTRG.11923.1	0.801116	0.960988	1.62786	3.99124	7.43161	6.70151	1.62743	1.86549	2.74395	-
MSTRG.11925.2	2.52631	3.40128	3.7867	1.67656	2.4694	0.593654	1.28712	1.72684	1.64481	-
MSTRG.11926.3	0.213834	0.087062	0.159304	5.62336	5.13273	2.29347	0.16566	5.81954	0.217424	-
MSTRG.11928.1	0.724091	0.80146	0.130037	0.532718	2.15528	2.60474	0.127991	0.701933	0.141335	-
MSTRG.11929.1	10.8071	1.42717	11.5191	20.5855	0.5686	21.672	1.62567	15.8712	2.79074	-
MSTRG.11929.5	5.70716	8.01444	7.08548	11.9698	12.1779	10.2594	6.50146	9.00471	10.9853	-
MSTRG.11929.6	0.527163	1.42193	1.25843	0.928004	1.44196	1.21372	1.14934	0.765672	0.138561	-
MSTRG.11929.8	2.87122	2.38257	2.59712	3.49215	3.05426	4.47741	2.08803	3.31669	3.28368	-
MSTRG.11931.2	2.20479	3.6236	3.3984	3.09358	10.4289	9.67486	1.43904	1.7046	6.15938	-
MSTRG.11931.3	6.40809	11.3161	11.0849	16.386	12.0076	8.45195	7.7711	8.78197	9.77909	-
MSTRG.11933.1	1.38211	1.47401	0.579695	0.985056	2.1892	1.13238	2.05918	1.9501	1.77684	-
MSTRG.11936.1	1.00373	1.09056	1.62761	0.712865	1.34695	1.64545	0.538981	0.939638	0.687588	-
MSTRG.1194.2	1.24023	0.854003	1.96291	2.31433	2.97427	2.58885	0.133942	3.16995	0.982023	-
MSTRG.11948.1	0.04233	1.32925	2.2359	4.8382	3.56838	2.75817	0.834634	2.89023	3.1439	-
MSTRG.11949.1	1.63508	2.01499	1.60417	3.87051	3.02323	1.75177	1.87308	0.459959	1.80287	-
MSTRG.11949.2	0.675969	0.663493	0.100198	1.26136	1.30206	1.781	1.10371	1.58549	1.86957	-
MSTRG.11956.1	0.753744	2.19826	5.48109	0.856337	1.38095	1.93332	0.093349	0.511431	0.051541	-
MSTRG.11963.1	0.337793	3.36052	3.24724	0.365678	15.6613	2.18057	0.204699	0.518212	0.359218	-
MSTRG.11972.2	0.815802	0.962253	0.887078	1.57789	0.527625	10.3599	0.875272	0.242275	1.22467	-
MSTRG.11978.1	0.393511	3.24904	2.50412	0.463789	16.9641	1.37099	0.30288	0.278959	0.495506	-
MSTRG.11980.1	0.259961	2.7607	1.51829	0.468426	9.04729	0.859971	0.30353	0.197965	0.12858	-
MSTRG.11986.1	10.338	4.57997	8.27896	9.17781	5.50451	0.940565	4.35373	8.21504	3.67205	-
MSTRG.11989.1	0.167319	2.21889	0.475346	0.535973	9.9418	0.485884	0.065309	0.116012	0.25123	-
MSTRG.11994.1	2.05249	2.46368	2.95181	1.75168	0.796035	0.639488	2.197	2.01595	2.23854	-
MSTRG.11995.1	17.7655	20.7235	21.3746	32.7231	22.0458	32.7192	30.9924	3.28736	24.7998	-
MSTRG.11995.2	6.80082	3.88528	6.45562	10.8327	8.15814	9.30334	7.28965	7.76149	7.29729	-
MSTRG.11995.3	9.2315	11.1012	5.65835	8.5542	10.066	6.95207	7.13956	3.94012	6.0219	-
MSTRG.11995.5	0.527085	2.73017	0.295242	2.86603	6.8644	0.252523	0.612723	4.05824	2.42878	-
MSTRG.12008.1	1.21273	0.967949	3.19711	1.3126	4.06778	1.47414	2.17181	1.88157	2.06492	-
MSTRG.12015.1	1.31648	1.61091	5.69599	1.4204	4.92945	21.3866	11.6931	1.33609	1.2436	-
MSTRG.12015.4	2.33865	2.05536	12.5672	13.7175	33.4604	7.20438	5.9134	1.54982	4.77554	-
MSTRG.12016.1	1.58316	0.903389	0.154382	2.8394	0.76545	0.911595	0.567292	0.271623	0.391524	-
MSTRG.12020.1	0.024819	0.41498	1.11761	0.059607	1.64751	1.82972	0.033915	0.198454	0.035347	-
MSTRG.12025.1	0.666593	0.991347	1.94013	5.05174	2.11675	0.786742	0.991343	0.584229	0.830847	-
MSTRG.12025.2	1.61368	0.741546	3.0105	1.17759	3.14825	0.491761	1.32006	0.686265	0.981406	-
MSTRG.12025.4	0.063426	1.18288	1.8221	0.16166	0.647974	0.514312	0.64386	0.909689	0.43713	-
MSTRG.12030.1	0.112663	0.619714	1.05967	11.2148	6.32832	3.84642	0.743575	1.69968	0.002901	-
MSTRG.12034.1	1.93859	1.56264	0.768766	1.85773	2.48329	5.63407	2.30049	1.89748	0.721558	-
MSTRG.12034.2	1.04045	1.15684	3.08733	3.15579	0.973504	2.92924	1.65239	0.64047	1.27873	-
MSTRG.12036.1	1.29488	1.02994	0.187177	0.705916	1.14029	1.74614	2.63189	0.856045	1.32559	-
MSTRG.12041.2	4.45202	0.933707	10.9326	13.185	15.8333	15.5225	0.10089	10.1238	0.56275	-
MSTRG.12043.2	6.40523	6.77449	5.64511	10.998	6.61672	6.23836	9.26674	4.73251	4.99287	-
MSTRG.12044.2	53.6495	54.1896	56.5245	78.8721	83.9103	83.6085	58.0002	62.1578	64.4745	-
MSTRG.12045.1	2.57769	1.9618	1.06364	5.0785	4.26652	5.63431	2.77415	7.70014	2.07418	-
MSTRG.12045.3	9.64592	15.0395	11.4372	1.47412	3.12864	1.32753	17.4968	3.47523	15.2295	-
MSTRG.12047.2	20.4915	17.0609	15.2575	19.0871	10.263	6.06804	19.4118	16.9924	16.9592	-
MSTRG.12048.1	0.860122	1.95428	0.766652	1.29207	1.25793	0.620344	1.45714	0.658453	1.30736	-
MSTRG.12049.2	15.9057	14.7956	14.0338	26.1159	23.7892	21.653	16.413	16.6677	16.294	-
MSTRG.12051.1	5.2336	4.53977	3.35102	2.31255	1.68366	1.29225	9.83725	7.68398	6.86651	-
MSTRG.12052.1	1.28797	2.01517	1.05618	1.38511	1.61615	1.26063	1.22988	1.22029	1.33566	-
MSTRG.12052.2	3.40618	2.29472	2.27446	3.35465	2.33658	6.06453	4.39123	4.194	4.78668	-
MSTRG.12053.1	0.302168	0.589655	0.564279	0.077716	0.769004	0.456559	1.07355	1.33005	1.92076	-
MSTRG.12054.1	2.34094	2.72017	4.35775	5.02595	5.15501	7.45316	8.58306	12.7181	9.56584	-
MSTRG.12061.1	1.3858	2.19692	0.810383	0.791746	2.65117	1.30238	1.10542	1.14449	0.845992	-
MSTRG.12068.1	1.77988	2.08086	2.23692	6.65618	6.46044	6.05706	2.93303	2.46652	3.57015	-
MSTRG.12068.2	6.58959	7.5802	6.10985	10.6526	9.5533	8.81485	6.81391	5.60965	7.01404	-
MSTRG.12069.1	1.1832	1.99808	3.07447	4.53058	0.170195	3.15363	0.105986	0.124457	2.08466	-
MSTRG.12069.2	0.95722	2.71824	4.40573	7.35107	12.2438	3.34817	8.50474	6.79165	4.48583	-
MSTRG.12069.4	1.85101	2.06799	4.24052	4.61564	11.3715	3.50049	11.9933	13.1058	4.63654	-
MSTRG.12074.1	14.4482	13.7005	17.961	16.2133	15.1968	22.156	15.2871	14.6491	15.6418	-
MSTRG.12074.3	25.4328	23.7153	32.2718	31.0403	16.9135	27.013	33.199	37.414	8.382	-
MSTRG.12084.1	15.7775	21.3366	14.7753	14.7747	20.9061	21.2729	29.375	15.3469	23.8354	-
MSTRG.12087.5	0.547825	5.66816	2.97171	0.281285	13.4581	10.3499	5.11728	1.60822	0.40821	-
MSTRG.12088.1	2.10277	2.43741	2.51313	2.92068	2.69837	3.1758	2.07002	2.54179	2.76949	-
MSTRG.12095.2	4.39945	7.78298	3.63561	3.72752	6.85169	0.781122	4.39621	2.8617	3.68738	-
MSTRG.12098.1	0.421331	2.11548	2.49569	1.14736	1.02898	0.560611	0.966136	1.55246	2.37599	-
MSTRG.12106.1	1.47589	1.50476	1.57681	2.8588	2.24184	3.75412	1.62922	5.41909	2.17657	-
MSTRG.12106.2	0.802252	0.745365	0.475752	0.590512	0.843906	3.32368	2.00596	3.39473	2.46439	-
MSTRG.12109.1	0.637369	0.308117	0.31663	0.497015	1.76623	1.17809	0.256409	0.51597	0.751102	-
MSTRG.1211.1	0.257989	2.41034	3.48554	0.654831	1.30014	0.296586	0.36135	0.966821	1.02162	-
MSTRG.12110.1	2.75191	3.03038	3.61931	3.25129	3.34181	4.93941	3.39821	3.84272	3.68021	-
MSTRG.12112.3	0.012301	0.01753	1.75549	0.02652	0.004672	0.018326	0.006123	0.019265	0.409574	-
MSTRG.12112.4	0.864866	0.819486	0.367629	1.78266	2.07714	1.89183	2.27868	1.36672	2.58943	-
MSTRG.12113.1	2.06537	2.19327	1.87941	2.47888	2.07588	2.46066	2.35992	2.39941	1.59847	-
MSTRG.12113.2	1.35388	1.18409	1.59036	0.867659	0.23321	2.84055	1.99728	3.22333	3.19656	-
MSTRG.12114.1	0	1.08515	0.410096	0.193184	4.2456	0.302186	0.061836	0.166062	0.368638	-
MSTRG.12118.1	0.075997	0.537805	0.493234	0.102306	2.73153	0.314429	0.14613	0.159687	0.32327	-
MSTRG.12119.1	8.24597	8.64533	7.56841	17.2707	21.3167	16.6064	8.17705	9.6421	14.5563	-
MSTRG.12119.2	5.94509	7.26484	7.88706	3.10229	3.03867	4.06206	5.98364	4.80988	3.26191	-
MSTRG.12119.3	1.82703	0.852698	0.529038	3.863	1.72632	1.92376	2.2584	5.80388	0.979848	-
MSTRG.12119.4	1.06155	1.04369	0.700299	0.580318	1.02863	2.43232	1.13543	1.04286	1.02333	-
MSTRG.1212.1	1.3135	5.90295	5.43183	4.17695	2.37486	0.295219	2.19401	0.421102	8.18699	-
MSTRG.1212.2	0.228898	1.7284	1.96569	0.664035	0.599801	0.80347	1.68583	1.61601	2.23562	-
MSTRG.1212.4	0.029216	0.005555	0.00203	0.005658	0.012919	2.94747	0.2199	0.013802	0.012927	-
MSTRG.12120.2	0.733673	0.715018	0.887788	1.0842	1.54865	0.579433	0.90858	0.678519	0.146711	-
MSTRG.12121.2	0.148318	0.070992	0.377577	9.65245	7.19035	3.4409	0.088486	0.030862	0.008457	-
MSTRG.12122.2	2.13699	6.14389	4.61697	2.03713	17.4267	4.25266	3.92307	0.057144	4.14039	-
MSTRG.12122.3	0.86848	0.806078	0.752644	1.71896	5.92095	0.973168	0.67274	0.280124	0.470819	-
MSTRG.12123.3	4.35941	2.95575	4.92928	2.35637	6.86757	6.65575	1.46711	5.68478	2.39638	-
MSTRG.12125.1	0.094555	33.7434	0.178265	1.65929	17.1259	17.3274	0.428729	18.4318	0.967296	-
MSTRG.12125.2	0.025565	3.71215	0.039453	0.078997	2.53769	2.11775	0.056796	5.15564	0.126322	-
MSTRG.12125.3	5.52245	4.65794	2.59533	3.11934	3.1027	1.88817	4.44964	6.27214	3.16664	-
MSTRG.12125.5	33.2569	4.14152	26.8639	16.1461	3.13915	2.30202	31.8107	6.02926	29.8409	-
MSTRG.12126.1	0.298855	0.255673	0.377891	1.7022	1.98898	0.636609	0.039021	0.205797	0.038327	-
MSTRG.12126.4	0	0.478346	0.558856	5.76281	4.4038	0.520537	0.499401	1.55539	0.651707	-
MSTRG.12133.1	3.34688	11.4989	10.9965	2.97422	11.2926	4.51687	1.4949	2.60928	2.40807	-
MSTRG.12135.2	0.047608	1.60465	0.312834	3.19704	2.66994	0.839088	1.47686	1.93036	1.01567	-
MSTRG.12136.1	0.052245	1.47104	1.2729	0.497597	11.2832	1.26205	0.050145	0.166336	0.055373	-
MSTRG.1214.1	0.991952	1.16599	1.77255	1.49402	0.791558	2.24203	0.821656	0.759736	1.17494	-
MSTRG.12143.1	0.393064	0.397639	0.538239	0.795043	1.53115	1.60415	0.152124	0.24936	0.794986	-
MSTRG.12151.1	1.91577	1.51791	0.385564	1.88223	0.180525	0.836168	1.71978	1.68525	1.57262	-
MSTRG.12156.1	1.10042	3.29003	0.035266	3.41464	4.50212	2.12778	2.41226	4.08607	3.64719	-
MSTRG.12156.3	7.22308	2.51559	0.98902	3.50957	1.16283	2.79475	4.3376	0.737025	1.91528	-
MSTRG.12160.2	2.04428	2.66346	1.78674	3.0124	3.53949	0.218613	3.15065	3.36682	3.28926	-
MSTRG.12167.1	0.245489	0.009739	0.002693	0.610272	0.478327	2.21575	0.007069	0.309376	0.015124	-
MSTRG.1217.8	0.287814	1.10276	0.903204	0.510356	11.88	0.760612	0.315899	0.455233	0.566825	-
MSTRG.12170.2	12.1046	0.991245	10.6693	16.4389	13.7864	12.6984	14.54	15.3813	2.14269	-
MSTRG.12174.2	6.77833	5.46199	8.53572	6.18441	3.43385	10.1762	8.53177	3.33928	10.9295	-
MSTRG.12180.1	1.32721	2.07118	1.00627	2.39125	0.470119	1.41289	1.9937	2.45299	1.80467	-
MSTRG.12180.2	0.401315	0.149081	0.732955	0.066986	2.84722	0.440481	0.027832	0.316404	0.906675	-
MSTRG.12189.1	2.69811	7.8517	7.34134	9.34811	6.13446	4.62079	5.92073	4.38422	7.55316	-
MSTRG.1219.1	2.75434	8.9215	6.74962	8.01278	5.40569	9.62368	3.99764	6.86502	4.25971	-
MSTRG.12190.2	1.98511	4.98942	6.25071	2.15949	2.25895	0.408475	8.9415	7.13865	6.46845	-
MSTRG.12198.1	0.024959	1.32505	1.1853	0.142655	7.42915	0.39822	0.238361	0.052976	0.052907	-
MSTRG.1220.1	2.99992	3.08345	3.1153	0.55207	0.65268	1.01736	2.57604	1.08413	2.3271	-
MSTRG.12206.1	0.650773	0.8699	0.634603	6.48086	2.36143	1.8898	1.66461	4.14037	3.09464	-
MSTRG.12207.1	0.432575	0.97362	1.5047	1.64894	2.82617	0.783876	0.585009	0.965487	1.307	-
MSTRG.12208.1	0.850204	0.762688	0.863499	4.09651	2.49176	1.36158	0.352096	2.23805	1.75224	-
MSTRG.12211.1	0.535549	1.59927	0.625111	8.34708	14.1496	9.35159	2.24369	2.57867	3.29302	-
MSTRG.12214.1	0.317242	4.86374	3.3572	0.453927	19.6732	2.03326	0.32068	0.373613	0.369391	-
MSTRG.12215.1	0.761105	1.25788	1.23815	2.12002	2.31985	0.088778	1.44239	1.51834	0.212259	-
MSTRG.12223.3	0.097182	2.44318	3.30544	4.76152	0.041963	0.96877	0.299946	0.026329	1.66277	-
MSTRG.12226.1	0	1.43241	3.11029	0.108145	10.7577	1.27627	0.081903	0.045622	0.050575	-
MSTRG.12227.1	2.94363	2.80007	3.493	1.09919	1.60197	4.43709	4.07654	1.3659	1.37131	-
MSTRG.12229.2	0.968242	1.09112	0.995035	0.990084	1.25256	2.42897	1.00995	1.57221	0.782547	-
MSTRG.12230.1	82.9117	79.9747	88.2456	142.53	101.977	123.53	92.7761	101.204	110.311	-
MSTRG.12230.2	45.6243	43.8053	46.607	84.4596	63.5816	78.0656	45.2597	45.8065	58.1754	-
MSTRG.12230.3	31.7113	28.1426	26.5	43.5504	29.2125	31.9565	31.32	35.5073	36.9098	-
MSTRG.12231.1	25.942	23.8563	18.145	27.9566	19.4921	13.9649	28.1979	27.6049	27.4728	-
MSTRG.12233.1	4.74911	7.02794	4.74915	4.97763	27.4476	9.72742	3.26092	3.70505	3.635	-
MSTRG.12235.2	0.150973	0.527999	0.748955	1.07081	0.336486	6.43057	0.296101	0.95525	0.670528	-
MSTRG.12235.4	0.327762	0.519593	1.85912	0.468772	1.20597	4.99531	1.88265	0.460307	1.3483	-
MSTRG.12235.5	4.20768	4.62186	3.70243	6.35292	5.12895	3.28474	4.73924	5.75174	5.55068	-
MSTRG.12235.6	0.493467	0.537277	0.438011	0.651869	4.04977	1.42674	0.244921	0.879345	0.707929	-
MSTRG.12238.1	1.07086	1.23566	2.0993	1.37276	1.65897	2.11243	1.37414	1.73812	1.78559	-
MSTRG.12244.2	0	1.28008	2.06477	6.46299	1.64612	0.597541	0.34612	1.69038	1.25131	-
MSTRG.12245.1	0.72415	1.09363	1.46391	3.75695	2.17964	3.58861	1.51426	2.52368	0.993988	-
MSTRG.12246.1	0.232256	1.87839	1.47253	0.645638	14.2341	2.49948	0.596446	0.332217	0.493974	-
MSTRG.12248.1	0.013354	0.133225	4.50211	0.008474	0.021102	0.005716	0.010049	0.001786	0.005915	-
MSTRG.12249.1	41.608	50.5242	38.9002	12.7794	7.89372	17.6144	25.1071	30.6897	22.741	-
MSTRG.12249.2	4.46013	5.57128	8.63788	4.0375	4.47721	17.0878	1.8859	3.28135	8.87227	-
MSTRG.12252.1	0.04234	2.92797	7.39564	0.030966	16.744	3.14709	0.169377	0.045046	0.044988	-
MSTRG.12253.1	0.151332	3.41627	9.54279	0.084	1.11971	6.44202	1.39487	1.83939	0.058052	-
MSTRG.12262.1	0	1.42314	2.95053	1.32537	1.99622	1.48658	1.46013	2.20005	1.27637	-
MSTRG.12263.1	6.64698	6.21159	4.17064	2.2756	2.71429	1.9771	5.77011	4.94142	2.24578	-
MSTRG.12265.1	0.794401	0.413868	0.25475	0.828314	0.892307	1.52849	1.4804	0.659107	0.52732	-
MSTRG.12267.1	0.754558	0.973256	0.716724	1.99688	2.95863	2.82379	0.963303	1.49504	1.03868	-
MSTRG.12270.1	0.400773	2.5e-05	0.423006	4.36274	3.02003	0.220396	0.243269	0.001079	0.194301	-
MSTRG.12270.2	2.9028	1.19565	2.28193	1.33565	4.69047	0.066104	2.35883	6.75346	1.63228	-
MSTRG.12270.3	0	1.65285	0.000304	3.02519	0.009017	8e-06	0.001648	0.008737	0.996087	-
MSTRG.12271.2	25.1141	43.6159	26.8537	90.7777	72.2875	32.3937	49.3746	70.251	54.8084	-
MSTRG.12271.3	8.23803	9.83185	9.60193	22.6778	14.934	12.9917	11.4701	15.0645	12.7721	-
MSTRG.12271.4	4.11752	5.5364	8.66544	6.65173	9.4894	6.70251	12.5416	9.33486	4.88712	-
MSTRG.12274.1	0.220717	0.25071	0.27409	0.488711	1.1485	0.883727	0.141989	0.32561	0.404681	-
MSTRG.12276.2	4.76796	4.89031	4.28873	6.46824	6.80129	6.39458	6.24754	6.0383	5.85875	-
MSTRG.12287.1	0.431309	1.5022	1.07072	2.1741	2.87902	2.72009	2.5315	6.04284	2.1962	-
MSTRG.1229.10	0.061168	0.024355	0.047555	1.07073	0.641709	0.440559	0.065806	0.048544	0.060959	-
MSTRG.1229.11	0.059826	0.038359	0.048097	1.41082	0.699403	0.746172	0.214921	0.040509	0.070736	-
MSTRG.1229.13	0.891082	0.481959	0.844347	0.196338	1.4292	0.197435	1.01994	1.09192	1.95453	-
MSTRG.1229.3	0.04598	0.133696	0.047555	1.62648	0.654923	1.28284	0.058527	0.050728	0.045055	-
MSTRG.1229.4	0.804067	1.69811	2.29788	1.59237	1.17941	0.475521	2.9663	3.39393	1.41987	-
MSTRG.1229.6	0.034637	0.025007	0.047819	2.01299	0.65214	0.867384	0.037517	0.022603	0.040698	-
MSTRG.1229.7	1.97179	2.03998	1.51526	0.675597	0.78726	0.461757	1.03987	0.744329	0.934487	-
MSTRG.1229.8	0.046151	0.033397	0.043984	1.10192	0.634962	0.543643	0.041575	0.021411	0.063635	-
MSTRG.1229.9	0.243795	0.325887	0.504165	1.40633	0.719448	0.017945	0.5686	0.2694	0.41106	-
MSTRG.12292.3	1.6039	1.40816	1.89767	1.01444	1.16352	2.31352	1.6811	1.54295	1.49715	-
MSTRG.12292.4	2.84769	3.55109	3.75397	3.55717	3.5747	8.38294	2.75598	3.51022	3.51154	-
MSTRG.12294.1	0.091049	3.93699	5.36763	0.346324	21.422	1.0357	0.08739	0.190838	0.613268	-
MSTRG.12298.1	1.54256	1.66409	1.20217	1.37782	0.802949	1.54031	1.51748	1.14161	1.36203	-
MSTRG.12299.1	0.083008	1.39939	0.080503	0.130519	3.44909	0.328459	0.335221	0.036788	0.41261	-
MSTRG.12299.3	3.22321	3.87998	5.86545	3.97284	6.59177	4.81164	4.92741	9.66226	4.34194	-
MSTRG.12299.4	4.51247	6.02278	4.11279	6.05975	3.6105	8.13771	4.1439	3.74759	6.83645	-
MSTRG.12299.6	3.68791	5.2489	1.43862	3.91303	4.98022	3.43115	5.22572	3.58785	4.40642	-
MSTRG.12313.1	0.139444	1.0311	0.238107	0.438724	16.431	2.44837	15.9154	0.180642	1.21133	-
MSTRG.12313.2	0.514807	1.33846	0.412969	1.23316	3.86321	1.57134	4.8782	0.202504	0.725782	-
MSTRG.12313.3	3.04811	3.3	8.35748	3.06148	3.13321	5.66549	3.55927	10.7027	10.751	-
MSTRG.12319.4	0	0.297509	1.10331	0.639053	1.19142	4.71165	0.290134	0.316319	0.337	-
MSTRG.12323.2	30.8059	31.5564	27.7641	27.3988	24.4053	29.2904	39.0721	36.9579	32.7736	-
MSTRG.12325.1	11.2193	8.54805	4.68087	7.85358	5.82728	5.73607	5.23644	4.9531	6.43987	-
MSTRG.12326.1	13.8923	10.3306	12.9321	15.6727	15.1971	17.2732	8.88345	8.86538	14.7756	-
MSTRG.12328.1	0.483593	1.03256	1.16912	1.85336	1.54491	0.32876	0.98235	1.45047	0.884663	-
MSTRG.12329.1	2.84993	2.07145	2.40253	5.7254	4.30623	4.22917	3.30607	3.38586	3.64977	-
MSTRG.1233.1	8.86635	12.0539	11.4494	39.8022	13.1688	20.3958	9.20733	18.6103	18.4802	-
MSTRG.12337.1	6.47695	6.56563	6.89585	3.48509	4.88685	5.35269	5.72571	5.34464	4.88899	-
MSTRG.1234.1	1.66524	1.05064	1.72486	1.97108	1.35917	0.766025	1.77736	0.646524	2.11415	-
MSTRG.1234.2	2.31722	1.94585	1.21374	2.35235	2.16028	1.76021	3.67405	2.51788	4.88287	-
MSTRG.1234.3	0.790346	4.5261	0.082803	0.631645	0.355013	0.760069	0.317921	1.34516	0.065106	-
MSTRG.1234.5	1.09082	1.91038	0.612164	0.62052	0.115667	0.000332	0.413154	0.922819	0.099047	-
MSTRG.1234.6	1.62116	1.47335	1.50361	1.13798	1.35237	1.3234	1.25558	1.07885	1.65658	-
MSTRG.1234.9	1.45199	5.40849	3.78573	1.30237	13.4022	1.41221	2.83879	4.11647	2.87325	-
MSTRG.12345.5	0.320987	4.62449	1.1976	0.853429	4.93628	3.71558	0.258212	0.554619	0.343686	-
MSTRG.12347.1	2.03089	2.98047	0.592131	3.05176	4.93597	1.56816	2.57224	4.18107	3.06283	-
MSTRG.12348.1	0	4.11026	3.7772	0.095012	20.4777	1.97403	0.026421	0.116856	0.058352	-
MSTRG.1235.1	11.1075	7.00077	8.18542	1.56052	0.49571	2.3587	6.62961	7.49775	6.12069	-
MSTRG.12350.1	1.38328	1.46817	0.499731	1.59052	0.508113	0.338102	1.05675	1.19911	1.17137	-
MSTRG.12356.1	0.366202	0.729032	0.937006	0.384196	2.60079	3.88661	0.390661	0.440406	0.468937	-
MSTRG.12358.1	0.370904	3.40977	3.85253	0.459897	13.4128	2.48546	0.650459	0.572076	0.496017	-
MSTRG.12358.3	0.775169	0.877052	0.7059	2.26543	1.88027	1.36638	1.46445	2.1336	1.71978	-
MSTRG.12359.1	0.653832	1.77365	0.896279	1.32178	1.64668	1.79852	1.08707	1.20009	1.18862	-
MSTRG.12360.1	1.38218	1.07277	1.33944	1.91652	1.92561	1.124	1.24689	2.7167	1.73691	-
MSTRG.12361.1	0.157083	0.503573	0.37427	0.495806	1.85829	0.258381	0.125139	0.663489	0.501134	-
MSTRG.12363.1	1.41532	1.61676	2.08663	2.23465	1.80448	1.63013	1.25013	2.06248	2.05092	-
MSTRG.12363.2	0.057438	1.60642	0.563188	0.125098	8.22977	0.316178	0.149346	0.140706	0.034074	-
MSTRG.12366.1	0.278271	0.300819	2.22512	1.97085	4.8374	4.67868	2.43217	4.04049	0.278697	-
MSTRG.12370.1	1.43058	3.60316	2.79549	7.90131	14.7033	13.251	2.30454	2.98089	2.78626	-
MSTRG.12372.1	1.31972	0.956453	6.10924	4.06264	5.65945	17.1898	8.9481	6.85376	7.46693	-
MSTRG.12373.1	0.262047	1.92153	1.37558	1.05355	0.322531	0.269791	0.148886	0.300837	1.33438	-
MSTRG.12373.2	2.1561	1.26992	0.380588	0.472664	3.22046	1.48927	0.559658	0.535344	0.748029	-
MSTRG.12373.3	1.67115	1.06946	0.435366	0.460966	1.54014	1.59269	0.466646	0.370793	1.00306	-
MSTRG.12373.6	2.62168	1.90462	0.323641	0.188909	0.000395	0.907917	0.116453	0.204195	3.16489	-
MSTRG.12373.7	1.42711	1.05823	0.733342	0.360532	1.6353	1.61087	0.284214	0.818367	0.76856	-
MSTRG.12375.1	2.70206	2.5007	2.61446	3.08418	1.88618	1.91084	3.02218	2.67137	3.63544	-
MSTRG.12377.1	1.36563	1.46909	0.576982	2.12698	1.81282	1.42194	1.86092	1.65807	1.26102	-
MSTRG.12379.2	1.47349	0.67787	1.45725	4.3929	3.39637	3.20637	2.54958	2.73749	1.64337	-
MSTRG.12388.1	6.31395	6.59177	5.98145	10.7408	11.2262	13.4804	6.61815	7.19474	7.47556	-
MSTRG.1239.1	25.0382	21.8036	21.3352	20.2475	12.5604	13.5558	19.7793	21.3192	23.089	-
MSTRG.1239.3	0.891204	1.17857	0.839815	3.04886	0.652816	10.2125	0.597768	0.675155	0.54754	-
MSTRG.12396.1	0.750822	0.384791	1.07903	5.33833	0.638186	0.057096	1.30417	1.75939	1.74106	-
MSTRG.12404.1	3.95789	8.22983	13.8178	15.9095	12.3936	7.2538	7.92931	12.8274	11.929	-
MSTRG.12404.2	0.591125	1.49994	1.7543	1.71552	1.25067	0.122032	0.678426	1.52836	1.29343	-
MSTRG.12408.1	0.829317	1.18822	0.98803	2.80611	0.053693	1.52359	0.290718	0.205402	0.529985	-
MSTRG.12410.1	0.528882	0.157094	3.46354	4.02822	43.0578	0.191382	9.32715	3.59474	0.086892	-
MSTRG.12411.1	0.173057	1.33117	1.09279	1.34075	6.2857	0.384425	0.283185	0.242134	0.30928	-
MSTRG.12415.2	5.48503	7.26645	4.52709	6.8567	6.20261	5.07405	5.59088	5.12911	7.3856	-
MSTRG.1242.2	13.0856	13.606	15.2025	42.5271	37.2659	42.2399	14.545	23.2183	15.4117	-
MSTRG.12425.1	2.26154	1.70918	4.28985	13.5769	6.10559	8.35368	2.65313	2.46492	4.37239	-
MSTRG.12426.1	1.35805	2.20448	1.77712	4.46824	3.35821	4.77639	0.827254	2.4895	3.35625	-
MSTRG.12427.1	0.082439	0.083064	0.241171	0.503955	0.399078	1.52872	0.039167	0.174978	0.523816	-
MSTRG.12428.1	1.52692	1.62471	2.23782	1.6025	1.03593	1.00589	2.20753	2.12225	2.32509	-
MSTRG.12438.1	4.25576	2.10572	2.90234	1.11802	4.84378	1.48865	1.59551	3.64612	1.50903	-
MSTRG.12438.3	2.17204	4.27021	0.82915	5.09966	0.617461	1.77489	2.84252	0.541936	0.465509	-
MSTRG.12438.4	1.45171	1.22316	1.43303	0.551824	0.415744	0.298287	0.906235	0.612833	0.614589	-
MSTRG.12438.6	8.93824	6.17189	5.34738	8.00081	3.61765	7.66071	8.1313	3.3065	3.55313	-
MSTRG.12438.7	6.92222	7.77759	5.12977	5.59521	4.52975	6.69633	4.9708	5.40717	4.05394	-
MSTRG.1244.1	2.48585	14.9897	2.83297	2.91558	19.1653	2.66094	2.72653	1.58074	0.962787	-
MSTRG.1244.2	26.709	14.3235	7.58629	30.1292	10.4161	18.9064	24.9854	28.1454	25.9128	-
MSTRG.1244.3	9.2487	4.21026	24.1586	5.80551	10.4566	22.9596	12.2201	9.5005	12.0558	-
MSTRG.12441.2	1.16474	1.40615	3.11317	2.03355	0.863609	0.973423	1.18656	1.63843	3.24627	-
MSTRG.12441.3	2.76499	3.67477	3.93302	4.6702	2.23951	2.19319	2.52627	4.02933	3.5041	-
MSTRG.12442.1	1.69	4.04808	5.82355	3.48771	5.65314	2.03535	0.472919	0.992008	1.6699	-
MSTRG.12446.1	0.873613	0.589689	0.65809	1.39163	4.73134	6.92821	0.336604	2.11998	1.1726	-
MSTRG.1245.1	31.964	41.4255	41.6275	108.576	90.3814	91.6435	37.6627	55.0228	59.6883	-
MSTRG.12450.1	3.90069	4.84166	7.86904	12.7363	20.2145	17.8202	9.61003	7.48756	10.1168	-
MSTRG.12464.1	0.454664	4.81633	7.44592	1.89369	6.70496	2.19158	0.093738	0.098286	1.36794	-
MSTRG.1247.1	4.09659	1.39972	1.75027	1.26354	1.65436	2.59838	3.73395	16.8112	10.3595	-
MSTRG.12473.2	3.34744	3.00919	3.85098	5.91319	2.92454	5.62809	3.22413	5.22583	4.62936	-
MSTRG.12473.5	0.633108	0.824478	2.7231	2.08564	1.64504	2.88679	2.36424	0.883619	2.20564	-
MSTRG.12475.2	1.62587	1.91826	1.90883	10.2338	7.25465	2.5093	1.62866	2.12367	9.76376	-
MSTRG.12475.3	0.898844	1.21781	1.33677	9.33538	4.41318	2.24677	0.942273	1.55671	5.22667	-
MSTRG.12475.4	4.74129	3.02945	4.66105	6.15712	4.29098	3.00255	5.19464	7.38889	3.91434	-
MSTRG.12475.5	26.1343	31.9086	25.9582	4.92777	3.79837	27.8837	30.3071	25.699	5.25446	-
MSTRG.12475.6	1.66339	2.63348	2.06777	2.43882	1.84828	3.19527	2.26884	3.0341	1.75523	-
MSTRG.12483.1	0	0.361269	1.36342	0.961463	2.77206	2.26856	0.054794	0.893896	0.558359	-
MSTRG.12488.4	0.911125	8.46589	4.12945	1.71126	0.632305	9.50322	6.61558	8.82785	8.7167	-
MSTRG.12491.1	63.8981	52.6359	63.6538	31.3501	26.8388	43.444	60.4946	65.8944	65.6944	-
MSTRG.12491.2	18.3018	13.6573	10.7738	12.9569	15.2852	15.5989	24.2361	11.874	13.6471	-
MSTRG.12496.1	0.211919	0.28439	0.572733	1.613	1.8448	1.58931	0.26429	0.289297	0.288922	-
MSTRG.125.2	1.69464	2.31184	1.58186	1.41623	1.22276	1.35264	3.49899	2.66374	1.49213	-
MSTRG.12500.1	62.4164	58.0926	60.5784	86.7706	83.3723	96.6942	57.7051	57.738	61.874	-
MSTRG.12501.1	10.1083	1.89773	8.66541	2.23397	2.61522	1.58886	3.53094	4.07609	10.5565	-
MSTRG.12501.3	2.39617	1.35626	4.71007	1.84065	5.2335	2.45634	1.84828	9.04517	3.32885	-
MSTRG.12505.2	13.4962	17.9876	10.807	20.1847	18.1824	15.4418	12.9815	14.1183	16.9865	-
MSTRG.12505.3	2.55332	2.8063	0.642201	2.33299	1.75879	3.66204	3.31877	4.37763	3.96679	-
MSTRG.12505.4	0.337948	0.069321	9.43115	0.251125	0.014019	0.128488	0.842991	0.325385	0.135238	-
MSTRG.12506.1	0.010689	2.0508	5.00602	0.016133	14.1065	1.73237	0.092639	0.03403	0.011329	-
MSTRG.12515.1	3.0512	2.3526	1.22518	1.73676	6.37601	0.895304	1.26964	1.00606	1.29575	-
MSTRG.12515.3	9.34455	9.03005	15.6773	24.4116	9.93524	23.8338	24.0554	22.0691	19.1173	-
MSTRG.12515.4	7.96458	8.11821	4.07581	4.61058	13.5475	4.295	4.58672	4.95112	4.73075	-
MSTRG.12517.1	0.045924	0.982132	2.32314	1.12989	10.2363	2.1033	0.185131	0.616532	0.212951	-
MSTRG.12522.1	0	0.057982	0.034044	2.71679	6.64492	0.195279	0.092055	0.122142	0.322851	-
MSTRG.12524.1	8.37662	8.01108	6.46644	7.23675	6.65693	6.58054	6.41642	6.87089	8.95157	-
MSTRG.12525.1	2.25472	3.67964	3.68184	8.46657	5.17123	8.60555	3.5977	4.68949	5.11495	-
MSTRG.12527.1	1.19345	1.07476	1.26536	2.1248	2.87094	1.62783	2.34975	1.82566	1.86515	-
MSTRG.12527.2	0.481693	0.604333	0.703208	1.16439	0.640129	2.2625	1.65675	0.519631	1.07503	-
MSTRG.12536.1	0.230296	6.03581	1.40727	12.1768	2.20256	26.0149	13.0619	11.4906	2.97055	-
MSTRG.12536.2	12.2378	1.67622	3.35581	2.14135	8.05958	3.60984	2.41013	1.42521	5.65409	-
MSTRG.12538.1	2.1004	1.3949	1.34369	3.26625	4.99639	1.06426	1.85829	3.11968	2.78774	-
MSTRG.1254.2	0.017748	8.12367	3.84635	0.110821	17.5853	0.356812	0.104397	0.223004	0.210766	-
MSTRG.12541.1	1.45517	1.7576	1.09595	2.37055	3.33921	3.3183	1.83394	2.29383	2.13459	-
MSTRG.1255.1	0.912317	1.30623	1.33205	1.0033	0.633273	1.13748	0.961374	0.845463	1.23173	-
MSTRG.12551.2	14.0238	11.7267	9.67652	10.305	11.5371	7.60815	27.5097	34.9018	17.6715	-
MSTRG.12552.1	0.073961	0.419741	0.83989	1.0016	0.166117	0.360963	0.093626	0.584595	0.269905	-
MSTRG.12553.1	0	3.83761	7.56966	0.0149	17.5259	4.573	0.232797	0.10953	0.015694	-
MSTRG.12554.1	0.009789	3.6503	6.51958	0.009751	12.8177	2.80755	0.08418	0.091726	0.072363	-
MSTRG.12555.1	12.5664	18.5556	27.5835	24.403	16.4333	13.8189	19.2973	0.201671	3.85227	-
MSTRG.1256.2	3.80866	4.31504	2.90273	11.6297	9.93883	8.65644	6.18012	6.60311	7.68086	-
MSTRG.12569.1	10.6919	9.03729	8.71528	9.01331	2.88081	4.46457	9.37621	9.79983	9.63348	-
MSTRG.12575.1	1.84222	1.42282	2.39759	2.8489	5.02596	2.80507	4.58421	3.15748	3.68966	-
MSTRG.12575.2	2.47461	2.3863	3.12663	1.8953	0.726227	4.9322	4.97432	3.41687	2.29546	-
MSTRG.12590.1	0	3.31139	1.53106	0.014905	8.5467	0.903089	0.056867	0.157194	0.031398	-
MSTRG.1260.1	2.35112	2.82409	3.34579	3.35782	2.22513	0.6759	0.415861	0.727027	2.00516	-
MSTRG.12601.1	0.031185	1.50947	2.39199	1.74323	2.50462	0.913757	0.275381	0.676839	1.3394	-
MSTRG.12602.1	0.102012	0.860321	0.24788	0.214502	2.30336	2.12471	0.643419	0.252347	0.413479	-
MSTRG.12608.1	1.38006	1.91019	1.67152	3.70311	4.94611	7.34441	2.59695	2.16283	1.73873	-
MSTRG.12610.2	15.1789	4.44028	5.14423	6.41059	4.98439	5.5905	3.00306	2.45045	3.95389	-
MSTRG.12612.2	1.75546	1.91801	1.69326	2.15575	1.80056	1.92044	1.28882	1.8805	2.27951	-
MSTRG.12612.3	0.967833	1.20126	0.284309	0.447314	0.64225	0.735531	0.425117	0.992073	1.14039	-
MSTRG.12616.1	11.12	5.36623	6.64819	7.84387	5.5375	7.43346	16.6453	5.10702	7.55532	-
MSTRG.12616.4	17.815	16.5531	12.6394	0.884331	3.46489	2.48865	15.61	0.345767	0.116817	-
MSTRG.12617.1	5.06126	5.78071	5.21586	11.7868	8.94107	11.3353	6.66997	8.86466	7.75472	-
MSTRG.12618.1	7.76581	7.00594	7.62935	18.5929	11.4009	10.0173	10.3161	11.7591	6.90703	-
MSTRG.12618.2	0.507105	5.42708	2.50463	0.634753	19.5017	1.07228	0.303379	0.222668	0.456169	-
MSTRG.12621.1	0	0.119102	0.020689	0.648285	2.08257	1.33627	0.257345	0.68532	0.231789	-
MSTRG.12629.1	2.01168	3.32004	4.51291	6.95936	3.74295	2.83529	1.30426	3.10968	3.03657	-
MSTRG.1264.2	0.405826	0.217938	0.388907	1.79932	0.16325	0.235781	0.219942	0.573243	0.213216	-
MSTRG.1264.3	0.092403	0.121481	0.12176	1.98054	0.020647	0.739073	0.601825	0.142328	0.044279	-
MSTRG.1264.5	2.66795	0.797628	4.49905	2.41835	4.22908	1.49423	2.16804	2.12049	3.68675	-
MSTRG.12642.1	2.79978	3.09077	3.16896	2.05794	2.37074	1.30698	2.51909	1.28645	2.60031	-
MSTRG.12642.3	0.459123	0.230872	1.2334	3.897	0.732693	0.264288	1.2011	0.20551	0.729536	-
MSTRG.12644.1	1.21208	1.71948	3.74527	0.47869	6.40307	2.14275	0.485596	0.786756	1.49048	-
MSTRG.12648.1	1.86467	2.21186	2.5911	2.27833	3.56418	4.64779	2.83367	4.58624	6.14434	-
MSTRG.12648.2	2.04074	2.59715	1.74403	0.447416	2.66338	2.89387	2.17148	2.83092	4.594	-
MSTRG.12651.2	0.268501	0.331459	1.98663	0.361301	2.14134	0.928956	0.330514	2.71539	0.386016	-
MSTRG.12652.2	0.984301	0.448766	0.944147	0.369321	1.14114	0.861122	0.312195	0.484574	0.212165	-
MSTRG.12652.3	5.02759	3.54463	2.85378	5.4133	2.95568	1.47004	3.93162	5.2436	5.00582	-
MSTRG.12652.4	0.1781	0.762667	0.880576	0.927141	1.38311	2.55362	1.7823	2.69382	1.46866	-
MSTRG.12652.5	4.09282	1.72141	2.24171	6.69095	3.02696	0.170386	0.615262	3.74126	2.76527	-
MSTRG.12656.1	36.2668	39.184	38.9516	45.8563	44.0772	40.2242	36.4977	37.5486	39.8821	-
MSTRG.12657.3	0	1.37634	0.974815	0.660037	2.41262	1.07118	0.382501	0.503187	1.36083	-
MSTRG.12660.6	6.02839	6.42572	3.27993	13.1483	0.9426	2.48125	2.66251	7.81274	8.39674	-
MSTRG.12669.1	0.617435	1.50851	0.065576	0.237214	0.027128	1.01475	1.0076	0.261675	0.538312	-
MSTRG.12676.1	0.479191	0.395514	1.5642	2.19201	3.12041	2.59659	1.19293	2.96302	1.93373	-
MSTRG.12679.1	0.44582	0.92876	1.51431	4.44329	6.73132	4.7738	1.19526	1.32344	1.02739	-
MSTRG.1268.2	3.08816	2.71142	3.46154	5.15683	5.07834	0.907603	1.89593	3.20625	5.68252	-
MSTRG.12681.2	0.539194	2.62885	0.281924	0.57944	6.02977	3.97793	0.136778	3.4206	1.95565	-
MSTRG.12684.1	1.32821	1.69067	1.31374	1.17008	1.98891	0.998528	1.55656	1.67967	1.41058	-
MSTRG.12696.1	0.150627	0.152461	0.139897	1.81717	2.04658	1.19766	0.138403	0.327299	0.269577	-
MSTRG.12697.1	0.251725	0.380448	0.535125	2.12622	1.23777	0.340538	0.386573	0.369729	0.812403	-
MSTRG.12698.1	1.73244	2.66341	5.71939	11.2323	10.974	9.65826	3.38775	4.21897	4.98149	-
MSTRG.127.1	1.70178	1.30776	1	1.05393	0.904745	0.984024	1.71193	1.38414	1.59594	-
MSTRG.12700.1	1.06162	2.07344	1.63881	5.14208	3.99961	1.80006	1.22939	1.82781	2.08037	-
MSTRG.12702.2	0.288776	2.00976	1.83627	0.400772	12.4192	1.4923	0.19787	0.23997	0.076273	-
MSTRG.12703.1	0	0.119585	0.163699	2.54306	4.51352	4.85984	0.393573	0.104597	0.5245	-
MSTRG.12704.3	1.024	0.59887	3.23775	1.18196	1.25243	5.5686	0.415843	0.605835	0.033677	-
MSTRG.12704.4	1.65457	1.05012	4.09542	3.5239	2.57693	5.60542	1.39567	3.57287	1.16705	-
MSTRG.12708.2	0.60822	0.743565	0.22026	1.36318	0.111392	2.8565	0.803463	0.447111	1.59756	-
MSTRG.12708.4	2.05169	3.54688	1.15068	1.9267	0.101856	23.9382	0.002643	0.375634	1.25842	-
MSTRG.12709.2	3.10119	3.99893	2.76664	5.57577	4.8286	3.83376	2.92246	3.30495	4.3121	-
MSTRG.12716.1	359.56	458.693	498.803	317.718	245.186	104.078	502.242	495.098	535.28	-
MSTRG.1272.1	1.25786	1.17705	1.21318	1.64053	1.51904	1.69387	1.74429	1.74837	1.69153	-
MSTRG.12720.1	0.200334	0.174869	0.050443	3.04898	3.82749	1.79884	0.398021	0.407451	0.708497	-
MSTRG.12730.1	0.525253	1.51382	0.956812	1.39499	0.521962	1.68697	0.797464	0.713052	0.947218	-
MSTRG.12733.1	0.073094	0.147296	0.542936	0.481585	1.89261	0.726626	0.278521	0.155143	0.193678	-
MSTRG.12736.1	0.037033	3.39149	2.32394	0.04204	10.8593	0.718385	0.026329	0.101164	0.075884	-
MSTRG.12739.1	5.51211	3.4927	6.56754	1.37881	2.96237	2.3996	0.631309	1.05789	0.875508	-
MSTRG.12740.1	0.086241	2.51069	2.60641	3.15458	6.29235	0.753546	0.158982	0.227849	3.63158	-
MSTRG.12741.1	0.289272	0.478973	2.70542	1.2147	1.03455	1.72359	0.407295	0.656009	0.766848	-
MSTRG.12742.1	4.5747	8.08146	7.48107	9.588	7.58644	17.9444	4.77575	6.33109	6.48076	-
MSTRG.12747.1	0.284938	1.03684	1.41802	1.75892	5.46758	3.14216	0.626873	1.52503	0.688105	-
MSTRG.12752.1	0.28713	3.0798	2.20565	5.53449	5.82991	8.52979	1.21819	1.06255	2.1759	-
MSTRG.12752.3	2.7242	5.72843	3.30447	3.61292	1.06917	5.69951	3.07329	1.43486	1.64925	-
MSTRG.12755.2	0.43036	6.16281	2.80131	0.364872	0.018003	9.46402	0.569153	0.592178	0.549509	-
MSTRG.12757.2	2.75636	0.684123	1.14341	0.833271	3.71929	1.06272	1.46894	1.88373	2.14028	-
MSTRG.12757.3	1.28613	0.368983	0.813562	0.546459	2.07148	0.907666	1.10668	1.48785	1.18528	-
MSTRG.12757.5	9.93657	1.2692	3.19232	3.31478	28.6252	4.64156	2.80989	3.70409	15.8068	-
MSTRG.12763.1	1.67877	0.398785	0.523441	0.907137	0.897578	0.49352	1.59786	1.44773	1.52132	-
MSTRG.12768.1	2.00918	1.62314	2.47526	3.80281	4.87577	5.78981	2.87945	3.59906	2.88838	-
MSTRG.12771.1	0.773631	0.897377	0.846576	2.8136	1.44602	0.526531	0.818206	0.951739	1.43108	-
MSTRG.12776.2	10.3677	6.66637	9.37026	21.1629	13.6577	15.5817	13.2863	5.99849	18.5632	-
MSTRG.12776.3	0.281925	0.408058	5.25481	7.62473	9.19559	5.40554	5.0633	0.190582	3.23798	-
MSTRG.12776.4	3.99061	2.56602	5.19705	6.27826	2.76543	5.35119	5.47942	3.13283	8.9224	-
MSTRG.12776.5	2.78919	2.0568	2.46637	16.4027	1.21073	2.77567	3.05565	1.62709	7.05813	-
MSTRG.12776.7	1.25063	1.78737	2.72923	1.70302	1.90721	2.18412	1.64313	0.903018	1.68012	-
MSTRG.12776.8	0.099361	0.958858	2.59652	5.18469	8.23955	1.90484	1.64488	0.181584	0.473949	-
MSTRG.12778.1	5.18006	1.31352	2.02231	1.5703	5.02116	2.25142	4.11261	1.57306	0.790183	-
MSTRG.12778.2	0.751186	2.26797	1.18958	0.730801	0.040504	2.61777	1.08405	1.36199	2.37513	-
MSTRG.12778.3	3.82332	3.87476	3.15761	0.89592	1.19909	5.67088	3.35577	2.78635	3.49112	-
MSTRG.12781.1	0.179661	0.486651	0.352046	6.05726	13.6935	4.29403	0.099862	0.084028	0.081411	-
MSTRG.12784.1	6.96279	5.12991	3.1216	5.52797	4.16786	5.33249	7.40516	7.5742	7.01151	-
MSTRG.12793.1	6.17552	4.89569	2.18545	3.84509	0.855876	2.22487	3.02317	4.18738	4.44341	-
MSTRG.12793.14	4.75312	12.2377	11.4324	8.34678	1.97812	3.41349	9.38611	8.96635	4.6746	-
MSTRG.12793.3	1.9969	0.534664	0.487913	1.01378	0.712505	0.53024	0.572699	2.19782	2.76986	-
MSTRG.12793.9	0.388696	0.421861	0.00335	1.96049	0.67915	6.2516	0.073262	5.53597	7.58623	-
MSTRG.12794.1	11.9281	10.2837	10.6795	12.4221	9.30435	6.24306	8.28538	7.96905	11.7884	-
MSTRG.12795.1	14.3322	24.6329	15.1261	26.9437	24.3318	9.44826	20.9495	20.1799	12.836	-
MSTRG.12795.2	5.77338	12.8839	4.78182	5.38535	7.45842	1.90708	5.9418	9.4797	6.64299	-
MSTRG.12796.1	1.19805	2.48161	2.59744	2.52326	3.18387	2.09717	1.52018	2.05015	2.09229	-
MSTRG.12797.1	0.532897	1.15083	0.346437	0.534897	1.28985	0.331606	0.508071	1.034	0.423135	-
MSTRG.12798.1	1.29513	1.9243	1.55656	2.57983	2.05215	0.805922	1.46044	1.85918	1.45809	-
MSTRG.12804.1	2.23752	2.4135	0.362296	5.05121	4.69877	4.41135	2.21528	3.05525	3.03047	-
MSTRG.12821.1	0.002429	1.35264	1.02109	0.036825	6.54118	0.778376	0.011851	0.002578	0.030892	-
MSTRG.12826.1	2.11233	2.23804	0.86586	1.93306	2.21231	1.61877	2.5531	2.89763	2.32918	-
MSTRG.12830.1	2.76795	0.601467	0.545079	6.9882	1.80436	9.83169	0.6085	3.16903	1.87489	-
MSTRG.12830.7	2.53951	0.604465	0.526928	3.6108	1.69761	0.050014	0.550516	2.92246	1.4632	-
MSTRG.12833.1	0	0.057076	0.234954	3.36962	5.8978	1.02439	0.283867	0.481109	0.198711	-
MSTRG.12835.1	2.03876	1.96568	0.639474	0.388957	0.515816	0.453732	0.373143	1.03137	0.423441	-
MSTRG.12835.2	1.99687	2.63025	0.850324	3.25301	5.88452	2.2425	2.80111	4.52902	1.5461	-
MSTRG.12835.3	0.890683	1.73897	1.55943	1.96153	1.63226	1.06207	1.91899	1.58681	1.63228	-
MSTRG.12836.1	0.89703	2.94035	3.15146	2.17604	9.05698	2.6281	0.999607	2.03431	1.47814	-
MSTRG.12842.1	81.8889	11.166	7.99515	2.40012	0.038484	0.065993	28.2524	35.3793	22.1041	-
MSTRG.12843.2	90.8549	15.5753	13.7479	12.3484	0.721186	1.41884	62.2641	77.242	42.3841	-
MSTRG.12844.1	0.03315	0.339937	0.096978	1.39512	1.30024	0.497137	0.27363	0.802934	0.510157	-
MSTRG.12845.1	2.43766	0.719413	0.141278	1.91095	0.740803	0.51365	1.07348	4.78768	1.68777	-
MSTRG.12852.1	6.13363	3.38435	2.51156	3.5593	0.354903	0.607101	12.6055	13.9756	7.1175	-
MSTRG.12854.1	1.53049	3.46745	2.77978	1.26005	0.087598	0.014348	0.556907	1.89673	1.90089	-
MSTRG.12855.1	0.141554	3.41674	2.3272	0.337995	11.4857	1.56432	0.138168	0.294084	0.600121	-
MSTRG.12858.1	0.63437	0.817764	0.787831	3.2315	1.82256	0.65719	0.62278	0.88162	1.00924	-
MSTRG.12862.1	2.35707	1.68498	1.30151	3.41158	1.9944	1.84736	2.16645	3.40588	3.48223	-
MSTRG.12863.1	0.055906	1.06744	0.817749	0.056256	7.93769	0.690203	0.107318	0.118661	0.058957	-
MSTRG.12874.1	3.53451	3.51342	2.98772	4.26635	2.90998	4.06842	6.12851	6.21473	0.15472	-
MSTRG.12875.1	4.64043	4.86255	4.25415	5.22108	3.53884	4.35633	6.0986	5.93979	6.09672	-
MSTRG.12880.1	0.457903	1.00006	1.2472	2.06058	1.26001	1.03525	1.1282	1.42186	0.870542	-
MSTRG.12882.1	1.82988	0.987445	1.07391	2.01362	1.98547	1.39369	1.30404	1.39645	1.22896	-
MSTRG.12883.1	17.5263	6.06256	4.13126	2.27279	4.10594	1.2009	32.1445	8.84025	9.1904	-
MSTRG.12884.1	0.520137	0.669765	0.014107	1.75644	2.86276	0.796762	0.864836	2.26749	1.10172	-
MSTRG.12884.3	0.457265	0.572194	0.570092	1.61229	0.042651	1.03354	1.26414	2.54135	1.37524	-
MSTRG.12885.1	0.229782	2.28067	1.26281	0.36335	0.04807	0.36768	0.455431	0.696738	1.18118	-
MSTRG.12888.2	0.209794	0.144515	0.379315	0.212091	0.001725	7.53796	0.184194	0.23271	0.388579	-
MSTRG.1289.1	0.778155	1.15952	1.23947	1.26058	2.60354	1.82676	2.34257	2.3695	2.19254	-
MSTRG.12890.1	2.75084	3.44584	1.64824	2.6673	1.09178	5.42784	7.4369	3.89513	3.10422	-
MSTRG.12893.1	11.1383	15.146	12.6554	16.9572	11.8907	7.34611	15.7468	14.3569	13.9146	-
MSTRG.12893.2	1.10051	1.11896	1.6753	1.89762	4.47834	0.00604	1.11744	1.59987	1.42542	-
MSTRG.12893.3	6.96099	10.5134	11.1751	12.9086	8.87802	8.02301	10.6006	10.4618	11.4756	-
MSTRG.12893.4	0.618231	0.792958	1.1535	1.08557	2.08455	1.15522	0.691758	0.852698	1.06321	-
MSTRG.12893.6	15.2665	21.1539	23.0626	24.0989	14.8253	13.5124	21.2279	19.7437	16.7032	-
MSTRG.12893.7	9.98847	10.8816	14.0783	12.671	9.11642	9.45951	11.1101	12.7312	13.8384	-
MSTRG.12893.8	1.33312	2.07032	7.05785	1.36904	0.679521	47.9329	4.73914	2.02065	2.68425	-
MSTRG.12897.1	14.9631	17.2439	17.3929	16.4204	18.2359	27.28	14.9774	16.0003	15.6083	-
MSTRG.12897.2	13.724	3.21996	5.96009	4.58145	1.65592	0.097688	9.59127	12.19	4.01997	-
MSTRG.12897.3	2.25106	2.4125	3.57771	3.306	2.92489	4.37669	1.10219	1.37584	3.407	-
MSTRG.12898.4	1.87377	4.17458	1.78137	0.85505	1.35026	0.400116	2.39347	3.93005	1.09014	-
MSTRG.12898.5	5.83659	1.13445	1.9062	3.63203	0.56758	2.18049	2.12524	1.28719	4.96009	-
MSTRG.12913.1	4.14648	8.86715	10.2269	7.87965	3.11862	36.6697	16.1074	16.2996	18.9456	-
MSTRG.12913.2	3.80771	11.2619	14.3456	10.2472	5.05547	10.3186	6.64902	20.1554	21.8304	-
MSTRG.12913.3	2.00997	1.56797	3.26762	2.48509	1.70472	12.1946	5.99229	5.77799	3.71955	-
MSTRG.1292.1	21.7009	2.53232	7.80311	5.70899	3.0003	0.22429	24.8936	21.1369	17.4621	-
MSTRG.1292.2	72.6096	35.9605	39.1151	22.5042	11.344	7.60518	77.0697	61.6651	54.0078	-
MSTRG.12926.1	1.32494	1.25578	0.851029	4.97996	7.90906	6.65134	1.52195	1.8622	1.81311	-
MSTRG.12932.1	0.925084	1.60563	1.48607	2.302	2.28013	3.96321	1.18474	1.36558	1.44464	-
MSTRG.1294.1	1.06821	1.71671	1.38889	0.858852	1.46515	0.709032	1.26246	1.87392	1.28238	-
MSTRG.12943.1	4.89642	4.07959	5.79694	1.59973	1.32688	2.58651	4.60916	4.08534	4.61117	-
MSTRG.12943.3	2.94452	0.040685	2.1923	2.9379	1.37262	3.89519	2.90731	5.46757	1.31137	-
MSTRG.12945.1	3.28271	2.43315	2.26726	4.9056	6.44586	9.51463	2.49927	3.57057	4.25893	-
MSTRG.12949.1	0	0.629766	0.657117	2.77175	1.93285	2.67395	0.060021	0.912062	0.931582	-
MSTRG.12952.1	2.5725	0.378287	6.80583	1.46163	1.64965	3.42216	0.14865	1.78146	2.36869	-
MSTRG.12952.4	0.029399	0.791764	3.18673	1.20218	4.90261	2.21257	0.319567	1.20296	1.2628	-
MSTRG.12956.1	314.617	167.765	126.25	109.6	82.8361	153.348	232.693	201.465	191.573	-
MSTRG.12964.1	1.28255	1.62079	1.62842	4.26894	5.38214	0.047892	0.917713	1.29686	1.10376	-
MSTRG.12966.2	19.218	15.684	16.5177	14.1582	1.84367	6.94654	10.9383	12.1905	14.6172	-
MSTRG.12966.3	0.67458	1.44156	0.462487	0.628119	8.01515	1.671	1.52828	0.786373	1.2613	-
MSTRG.12966.5	2.38347	1.08823	0.852081	5.04918	3.46156	2.4141	1.94856	2.40803	0.93862	-
MSTRG.12968.2	1.61055	1.81999	0.664564	1.61402	0.808088	0.586714	1.19815	1.22533	3.11359	-
MSTRG.12970.1	0.242086	0.188657	0.000643	0.236268	0.027539	1.74717	0.082002	0.168825	0.503811	-
MSTRG.12970.12	0.348404	2.49271	0.32323	0.404808	1.7883	7.57146	1.65592	0.356306	1.23895	-
MSTRG.12970.17	0.506119	1.47467	0.421429	0.691473	0.336351	0.26932	2.11359	0.633637	1.43677	-
MSTRG.12970.2	0.232266	0.000909	0.000706	0.22746	0.086645	1.48516	0.096834	0.18257	0.065402	-
MSTRG.12970.7	0.370134	0.331077	0.232052	0.396586	1.34002	1.70338	0.149103	0.221849	1.02788	-
MSTRG.12970.8	0.34537	2.15398	0.288179	0.450292	1.82855	6.6874	1.96359	0.372792	1.181	-
MSTRG.12971.1	2.45627	2.55195	2.31122	4.65934	3.96108	3.29623	3.68033	3.53158	3.5512	-
MSTRG.12972.3	0.836518	0.523371	0.352222	0.744584	0.484481	1.14264	0.72658	0.310872	0.260907	-
MSTRG.12972.4	0.068834	5.31449	0.815458	0.073134	1.47357	0.764005	0.037747	0.662395	0.643922	-
MSTRG.12972.5	2.62402	4.75676	5.23	7.5011	7.19159	7.70546	3.25067	3.4452	6.60213	-
MSTRG.12978.1	0	0.005179	0.011194	0.088193	0.131169	8.87822	1.96791	3.36617	0.001512	-
MSTRG.12978.2	1.22717	1.68966	2.90312	3.08351	5.55901	2.36036	2.64761	4.4412	10.6469	-
MSTRG.12978.6	1.65694	1.488	1.72891	1.52301	1.25655	1.34904	0.989806	1.25399	0.891554	-
MSTRG.1298.1	0.221518	0.730879	0.604619	0.222906	3.68854	0.82224	0.102892	0.292668	0.26237	-
MSTRG.12981.3	35.728	3.50565	28.0625	4.06269	39.4528	4.99002	38.3068	5.48048	4.61424	-
MSTRG.12981.6	6.43188	5.28334	5.82644	4.91078	4.90228	4.54438	7.16044	4.97113	1.59235	-
MSTRG.12981.7	3.18195	4.07434	2.90857	2.8134	1.84498	9.318	2.67903	3.07553	3.42562	-
MSTRG.12981.8	32.2511	29.4867	26.2683	37.1949	0.005846	36.3724	38.2436	43.6698	0.143159	-
MSTRG.12986.3	0.029196	0.090197	1.71798	0.098579	0.106414	0.677515	0.708173	0.038286	0.075092	-
MSTRG.12987.2	9.78322	11.4016	9.97792	12.2028	8.99081	10.4623	12.0626	12.0126	5.04689	-
MSTRG.12993.1	0.000548	3.77859	4.88193	6.77246	5.01604	5.84396	4.99293	4.48688	4.86769	-
MSTRG.12997.1	16.4219	18.0266	0.826785	2.03465	2.70148	23.1236	16.7392	22.7285	21.9798	-
MSTRG.12999.1	9.96307	10.073	9.82141	14.408	11.4665	9.39249	10.306	13.3892	12.2382	-
MSTRG.13001.10	0.98727	1.0537	0.558062	0.500958	1.42643	0.506863	0.850366	0.615841	0.823696	-
MSTRG.13001.11	1.0027	1.12203	0.514312	1.37473	1.13127	0.685601	0.752141	1.16079	1.65576	-
MSTRG.13001.13	0.659615	0.677784	0.807518	1.04872	0.967863	0.621252	0.412695	0.783343	0.650538	-
MSTRG.13001.18	3.01026	3.01163	3.50083	3.31111	1.46904	1.33365	2.22936	3.05436	1.76513	-
MSTRG.13001.3	2.14641	1.90438	0.89719	1.24629	0.731115	0.607435	0.461259	1.16093	1.10598	-
MSTRG.13001.4	4.04235	2.385	3.76306	4.40015	2.9563	2.09772	2.49908	2.83862	3.2564	-
MSTRG.13001.7	1.18871	1.28726	0.656784	2.50009	1.0717	1.49025	2.98301	1.57757	1.77937	-
MSTRG.13001.8	0.675512	0.673801	0.884575	0.538113	0.781573	0.575009	0.636215	0.936962	1.01522	-
MSTRG.13001.9	1.51217	1.154	0.941204	0.603414	0.839937	0.502033	0.844132	1.17732	1.56728	-
MSTRG.13002.1	13.2437	0.842384	0.460938	0.296077	0.851608	0.285142	21.0159	0.427438	5.00335	-
MSTRG.13003.1	4.88966	5.08743	6.51343	8.92854	7.20957	5.31201	6.13231	8.14494	7.516	-
MSTRG.13006.1	2.51643	2.32155	3.71528	3.61462	0.01984	2.34084	5.65222	10.0761	5.69376	-
MSTRG.13009.1	1.05904	3.92876	5.46052	1.61333	14.4195	6.45863	0.850133	1.23732	0.948067	-
MSTRG.13011.1	27.2088	25.9778	19.8222	27.4473	19.8011	14.4725	22.2191	24.7204	27.0848	-
MSTRG.13012.1	15.3526	17.549	20.7561	30.7134	22.6027	21.0007	18.4395	23.3066	21.4824	-
MSTRG.13017.1	1.34902	1.07513	1.71949	3.18394	2.40954	1.59341	1.25477	1.38978	1.9729	-
MSTRG.13018.1	7.26989	4.81407	4.76929	2.36114	11.7181	17.6605	2.99605	4.61245	5.3738	-
MSTRG.1302.2	0.706365	2.80009	3.5924	0.469424	9.33446	1.61485	2.50628	0.948415	0.780748	-
MSTRG.13020.1	16.7926	13.9222	11.3472	12.8281	6.74439	5.26669	10.4942	9.4446	13.6268	-
MSTRG.13024.1	1.11328	1.05821	1.75612	0.419815	0.290593	0.373541	0.753093	0.644493	0.598325	-
MSTRG.13027.1	2.56189	3.52662	1.3406	1.72897	3.20781	1.59768	2.54632	1.89487	2.28198	-
MSTRG.13028.1	0.806762	10.2619	0.257259	3.94364	6.78168	6.34374	0.038157	0.137716	12.2747	-
MSTRG.13028.2	0.733626	0.763347	0.028289	1.62152	0.02255	1.78617	0.556831	0.692302	1.22726	-
MSTRG.13028.3	17.812	3.32114	12.0547	3.97786	0.088086	1.97367	17.9332	16.7371	1.63513	-
MSTRG.13029.1	3.05842	1.10988	0.821452	0.730332	2.80175	5.91438	2.17169	3.0038	2.43628	-
MSTRG.13033.2	2.8331	2.34913	2.80485	3.95616	2.95901	4.21573	3.45745	2.60917	3.2094	-
MSTRG.13034.1	0	2.165	3.06284	0.168601	12.7277	1.82822	0.217213	0.107664	0.161287	-
MSTRG.13037.1	0.72509	1.80622	1.21987	0.780574	3.25494	0.737483	0.795581	1.10056	0.929993	-
MSTRG.13038.1	0.003636	0.009956	0.007893	0.008585	4.96943	6.82782	0.005676	3.8784	0.086552	-
MSTRG.13038.4	0.66383	0.992788	0.493392	0.774076	0.058759	0.097979	0.766423	1.86909	0.66063	-
MSTRG.13038.6	3.63328	7.72892	8.82454	14.5705	5.65578	10.7331	5.59753	2.54316	9.38487	-
MSTRG.13038.7	1.30513	0.421105	1.26292	2.00563	0.891575	2.46478	1.17405	0.844865	1.55179	-
MSTRG.13046.1	0.115942	1.48941	0.974025	0.116669	4.14144	0.739512	0.007048	0.086747	0.038504	-
MSTRG.13052.1	0.237109	1.02998	1.21315	0.306264	5.32322	0.557306	0.504826	0.704623	0.786784	-
MSTRG.13053.1	2.14461	0.989365	1.79046	2.55518	1.29799	1.04131	2.31992	1.45168	2.25187	-
MSTRG.13054.1	0.170145	2.23997	12.1722	11.0052	0.253554	12.3325	0.085362	0.094434	13.3195	-
MSTRG.13054.3	0.03475	0.076031	0.849325	3.44016	9.32019	0.407728	2.66176	0.024194	1.51516	-
MSTRG.13055.1	0.878902	0.65119	1.2763	2.24461	1.51225	2.42125	0.840115	1.90409	1.54878	-
MSTRG.13055.2	3.16085	4.50051	1.85405	5.17444	5.71618	2.25395	3.32143	2.43212	2.23208	-
MSTRG.13058.1	0.170432	2.07803	0.39628	0.325985	40.1303	0.663572	0.275162	0.274685	0.146228	-
MSTRG.13059.1	0.325144	1.17237	0.887161	0.17495	2.6366	0.370766	0.296955	0.326908	0.418127	-
MSTRG.13059.2	2.68442	4.03006	4.57229	4.61429	3.86637	2.60945	3.5526	3.68478	2.44311	-
MSTRG.13067.1	3.24554	2.11124	2.28871	2.78712	3.36095	5.88275	3.15483	2.90157	2.77203	-
MSTRG.13069.1	0	0.202937	0.204108	1.27289	0.960204	1.81743	0.036822	0.290293	0.201845	-
MSTRG.13072.1	2.49047	2.01729	1.02739	1.43655	0.870654	0.576776	1.79926	1.98158	1.10897	-
MSTRG.13074.3	1.39267	1.68732	1.15068	2.08559	3.29367	0.44321	1.58107	1.56331	0.939973	-
MSTRG.13074.4	0.033128	0.354075	0.273152	0.879492	0.383818	5.80149	0.44963	0.263669	0.496137	-
MSTRG.13077.1	0.003231	0.39044	0.638857	0.023674	10.4315	0.330228	0.01137	0.003636	0.005403	-
MSTRG.13079.1	0.133602	0.044872	0.434276	1.16156	1.20785	1.46016	0.552898	0.321855	0.259133	-
MSTRG.1309.1	16.9242	20.8798	16.8905	26.5253	25.7547	24.754	17.6979	25.0105	21.8836	-
MSTRG.13091.3	9.40924	9.46406	0.091703	13.5266	10.6785	1.09753	10.2388	10.793	12.3082	-
MSTRG.13098.1	21.5897	97.2847	117.827	82.5065	72.7727	91.1339	19.2842	42.0831	75.6906	-
MSTRG.1310.1	2.25832	0.818945	0.489194	0.743487	2.19958	0.490517	0.991993	1.12816	0.562742	-
MSTRG.1310.2	9.547	4.20099	5.54439	4.34118	15.2899	8.81983	9.22366	11.2519	6.54115	-
MSTRG.1310.3	18.8638	14.5938	15.0038	16.3338	13.9592	18.6034	34.4196	26.8313	14.7009	-
MSTRG.13103.1	2.00138	2.2456	1.16048	5.31668	4.54506	2.21841	3.20615	3.7727	4.47414	-
MSTRG.13105.1	3.97777	3.88013	3.73952	7.92443	5.4162	7.25796	5.88596	6.19757	6.99551	-
MSTRG.13109.2	8.54757	3.331	2.22658	0.969354	4.98531	8.09473	1.6435	1.30349	1.15743	-
MSTRG.1311.1	1.47258	0.711439	0.198544	0.770438	1.19153	4.74387	2.53067	0.69096	0.866788	-
MSTRG.13110.2	0.019538	0.657058	0.691258	0.020185	4.90607	0.112581	0.177076	0.027859	0.091998	-
MSTRG.13112.1	1.62522	3.85403	2.70146	7.61772	1.4567	0.636916	0.458947	1.78681	1.50467	-
MSTRG.13113.1	2.86084	3.78579	3.22239	2.49739	2.49337	2.25471	2.75159	2.1634	2.45201	-
MSTRG.13114.1	2.87638	3.30502	2.64113	6.93583	7.40248	5.96253	4.10504	4.43635	3.80248	-
MSTRG.13116.1	0.397485	0.26086	0.260463	0.943334	0.029034	6.42686	0.270206	0.18227	0.077191	-
MSTRG.13116.2	1.6706	4.01983	2.24602	6.80018	9.96162	0.023985	0.21274	1.73204	0.520802	-
MSTRG.13116.3	0.524123	0.1701	0.204932	1.06973	0.117774	3.83248	0.233819	0.209059	0.380542	-
MSTRG.13116.4	6.98254	8.97755	5.36405	5.78189	3.99791	5.75635	5.20135	4.08554	5.06065	-
MSTRG.13117.1	1.02042	0.519375	0.255354	0.31591	3.02283	18.1453	2.50705	2.32503	1.13736	-
MSTRG.13120.1	2.51449	1.98793	1.80706	1.35782	1.34695	1.94759	2.80251	2.21532	2.60099	-
MSTRG.13123.1	0.923354	1.34353	1.54938	0.231725	6.05572	0.62076	0.387556	0.166537	0.628091	-
MSTRG.13128.1	5.93597	3.14827	2.21488	7.48789	10.1136	21.0014	3.7043	3.6514	4.48996	-
MSTRG.13135.1	0.001416	0.040258	0.012498	0.013851	3.94087	0.009338	0.368596	1.23439	7.50674	-
MSTRG.13135.5	2.52969	1.88563	2.87319	6.00317	2.66692	1.61612	1.20766	1.632	1.00766	-
MSTRG.13136.4	8.96353	4.85693	5.33451	5.91941	3.14341	9.58207	7.84756	6.32128	5.09431	-
MSTRG.13137.2	0.038094	1.36724	0.051021	0.073536	4.25882	0.169799	1.91369	2.81051	3.59704	-
MSTRG.13138.2	3.05821	2.50679	0.012503	0.073319	0.024412	0.033423	0.043197	0.109752	0.048587	-
MSTRG.13138.3	27.2625	23.3085	22.8149	26.6758	9.61705	19.7563	29.6928	17.5032	14.4362	-
MSTRG.13138.4	3.70309	0.909876	3.20777	1.98506	0.23436	0.601621	2.39969	0.103056	0.225469	-
MSTRG.13138.5	21.0255	29.1046	29.0167	36.9627	18.4159	22.812	28.5256	22.0185	21.3328	-
MSTRG.13138.6	3.87031	8.44996	4.23749	7.30602	29.6706	5.69022	6.50652	24.7559	32.0618	-
MSTRG.13144.1	0.103741	1.52806	2.16123	0.572979	8.18446	1.78011	0.18147	0.137483	0.274884	-
MSTRG.13145.1	0.567615	0.445631	2.11538	0.051476	0.387152	0.087244	0.820395	0.064269	0.071802	-
MSTRG.13146.1	0	1.0398	0.205402	0.403709	1.11837	2.31865	0.411201	0.243529	1.61813	-
MSTRG.13151.1	2.57445	3.75707	4.33854	2.94534	0.517447	0.89548	3.70451	4.52566	4.37197	-
MSTRG.13153.1	1.61115	1.78933	1.98195	0.739455	1.27194	1.21913	2.32506	2.84825	2.67455	-
MSTRG.13153.3	0.619867	0.616287	0.924208	0.712692	0.575914	0.592783	0.690273	1.10661	0.779168	-
MSTRG.13155.1	0.650553	0.583717	0.786883	1.34421	1.63373	1.46372	1.09686	0.747471	0.91262	-
MSTRG.13156.1	1.15163	1.92814	2.34936	2.49484	1.97551	2.80912	1.35496	1.10588	2.36989	-
MSTRG.13157.1	0.643524	0.936544	0.219665	0.153855	8.05433	0.408714	0.780221	0.619681	0.462788	-
MSTRG.13159.1	0.039	0.07859	0.038031	0.535879	2.05313	0.051085	0.122684	0.223706	0.041335	-
MSTRG.13160.2	1.76362	1.75678	2.15374	0.094116	3.20007	1.52105	2.00418	1.81751	1.59058	-
MSTRG.13162.1	0.8167	1.93544	11.7358	1.3173	6.03951	1.54061	1.14302	0.863172	1.03658	-
MSTRG.13164.1	9.6493	4.37407	7.69836	18.3335	10.8363	20.2485	13.1918	12.9416	15.6423	-
MSTRG.13164.3	0.111021	0.732231	1.18349	0.645005	6.04825	0.737737	0.617623	0.717945	0.595364	-
MSTRG.13164.4	1.27586	2.59023	3.50274	4.1367	4.92715	6.65934	2.63963	3.79137	3.69744	-
MSTRG.13171.1	0.176194	1.98277	3.58828	0.069558	14.7188	2.57914	0.041901	0.951177	0.362326	-
MSTRG.13172.1	0.296673	0.636866	0.797387	1.58907	1.06137	1.5608	0.178195	0.861336	0.996581	-
MSTRG.13173.1	0.311224	0.772195	0.829288	1.7941	0.67703	0.358281	0.168774	0.230789	0.445724	-
MSTRG.13176.1	4.51328	5.02563	7.70279	5.1815	6.48787	5.91502	4.63916	4.72096	4.70245	-
MSTRG.13176.2	1.41033	2.8926	10.0473	6.99857	12.6724	6.84504	5.90839	1.70626	3.18637	-
MSTRG.13176.3	0.998696	1.53876	13.2632	2.19596	17.0279	24.3278	3.37771	1.43203	1.8713	-
MSTRG.13177.1	3.36339	2.83722	5.06113	5.31885	5.09647	3.45138	9.16234	8.05081	3.37735	-
MSTRG.13177.4	0.297891	88.214	0.274022	28.5263	0.519044	0.338384	4.2733	0.237071	0.202586	-
MSTRG.13177.5	0.150345	3.50667	0.243719	81.1769	0.1616	0.171737	0.104304	0.158263	37.3926	-
MSTRG.13178.1	2.2881	2.23839	1.73866	8.15332	5.21361	3.44196	3.50279	4.90956	4.08711	-
MSTRG.13184.4	74.6732	31.5375	24.2575	17.6497	14.7637	38.5379	81.6502	57.7341	54.5191	-
MSTRG.13185.1	8.00882	7.52203	6.70793	7.35487	4.77593	4.0925	10.3876	8.11973	9.81589	-
MSTRG.13195.1	0.123096	0.268451	0.185146	4.81444	0.540835	2.75197	0.141147	1.88966	0.078918	-
MSTRG.13196.1	3.15463	1.63372	5.20108	5.27191	3.34322	1.34684	2.38237	3.80787	6.2471	-
MSTRG.13196.2	0.731642	2.65757	1.38872	2.20629	1.23219	0.103314	1.85861	2.61626	2.52373	-
MSTRG.13196.3	1.04752	2.44158	0.865358	2.17621	1.7154	0.166609	1.70303	2.61232	2.19888	-
MSTRG.13200.1	3.50157	1.03745	1.33682	4.62501	0.416311	0.322661	1.11069	0.603142	6.49433	-
MSTRG.13205.1	0.445181	0.39741	1.23197	0.600691	5.50924	6.23292	1.95947	0.361085	0.81097	-
MSTRG.13205.2	7.74386	1.29428	6.32745	8.06117	2.82539	1.51511	8.15165	3.24578	7.7074	-
MSTRG.13205.3	0.084034	8.27311	0.098174	0.02824	0.010439	0.013844	0.630232	4.81337	0.068887	-
MSTRG.13205.4	1.19709	2.27559	1.19518	0.833071	1.82062	0.861345	1.67077	1.92978	2.22388	-
MSTRG.13205.7	4.75145	5.39901	0.062227	4.86247	1.0589	0.380843	2.08063	5.3546	5.66798	-
MSTRG.13206.1	4.09285	4.01402	2.37692	1.28789	3.83341	1.80664	3.25679	3.2112	3.82054	-
MSTRG.13206.2	56.7338	44.6893	40.6667	25.4441	15.2416	15.993	78.4563	54.0638	53.072	-
MSTRG.13210.1	0.73233	0.778668	0.912108	2.9221	2.23122	3.13172	1.09086	0.991567	1.40015	-
MSTRG.13212.1	0.395527	0.924656	1.03633	2.14123	0.845539	0.681262	0.591886	0.593326	0.741522	-
MSTRG.13215.1	1.46525	5.54731	3.2306	1.72212	7.04716	3.23977	1.95271	1.98051	1.80811	-
MSTRG.13219.2	0.974541	0.91874	0.667857	1.81898	1.4578	0.91523	1.28088	1.7028	1.3327	-
MSTRG.1322.1	1.54012	1.3602	1.78754	0.87498	5.23409	3.0524	1.20439	0.95277	1.00289	-
MSTRG.13223.1	12.0858	2.01887	13.3788	30.8898	16.522	7.16865	9.82468	14.9948	12.2291	-
MSTRG.13223.2	2.47689	16.014	15.2567	9.98251	10.9436	2.81289	11.6371	15.3401	11.1808	-
MSTRG.13224.2	0.63355	1.48925	0.142531	3.07541	0.650944	3.06935	2.06953	2.20729	2.11942	-
MSTRG.13224.4	0.807318	1.06771	0.951261	0.069694	3.41149	0.119513	1.16843	0.903765	0.759526	-
MSTRG.13225.2	1.01855	1.82067	1.97032	0.338586	0.070057	0.176528	0.361434	1.26782	0.341936	-
MSTRG.13225.4	2.35479	2.57032	2.4215	2.21106	4.38448	3.54997	2.33344	5.21961	4.67933	-
MSTRG.13227.2	0.439723	1.15847	1.25647	2.7313	0.610992	3.65293	0.646045	0.479163	0.787849	-
MSTRG.13228.2	0.989852	0.959812	2.07002	4.14534	1.06729	2.02619	1.91639	1.30337	3.61631	-
MSTRG.13228.3	0.458643	1.0669	1.96381	0.754628	2.37648	0.678295	0.434681	2.23869	0.692509	-
MSTRG.13228.4	2.5971	0.708709	6.59679	1.79841	11.6562	4.1588	1.06147	11.5786	0.950195	-
MSTRG.13228.7	1.95898	1.56707	1.91759	3.89077	2.82676	2.93536	2.07635	2.39039	2.30418	-
MSTRG.13228.8	0.809956	1.62059	0.270002	1.25032	1.78905	5.98597	0.921195	0.42182	1.09583	-
MSTRG.13235.1	27.1498	29.8756	33.1366	36.8907	43.1641	34.0544	31.203	30.8789	28.7068	-
MSTRG.13236.1	2.19709	5.68482	1.81679	8.0208	13.5192	1.56578	1.70816	2.80424	6.56156	-
MSTRG.13237.1	0.097285	3.19257	0.43034	0.333645	4.77377	0.384865	0.153369	0.128831	0.119448	-
MSTRG.13240.1	0.412611	1.69172	2.2903	3.2111	3.01329	2.7848	0.690628	1.88689	0.890443	-
MSTRG.13240.2	0.171929	0.32536	0.90326	0.681196	0.730482	1.41461	0.00324	0.587537	0.642932	-
MSTRG.13242.1	3.10835	3.11368	0.701299	2.76365	4.59479	4.77178	1.26543	2.71919	1.24033	-
MSTRG.13247.1	0.011013	0.010479	4.58778	0.043777	6.24912	5.30953	5.45126	4.61079	6.33508	-
MSTRG.13247.5	3.01797	5.18873	0.165806	1.26381	0.487263	0.020466	0.308252	0.23751	0.227781	-
MSTRG.13249.1	5.07915	5.20358	4.89344	7.54917	7.49204	5.17927	4.95502	5.46895	5.50462	-
MSTRG.13251.4	3.60684	1.36306	0.480656	1.3947	2.54806	1.27165	0.7637	2.3609	1.62023	-
MSTRG.13253.1	6.45782	2.93824	2.93378	5.17277	4.49956	9.41518	4.3034	4.78012	6.14012	-
MSTRG.13253.4	0	0.82496	1.01677	1.71071	0.678573	1.21643	1.94094	1.11625	1.27083	-
MSTRG.13254.2	1.91291	0.560973	0.949716	1.11312	2.19126	1.80095	2.29951	0.416014	2.07467	-
MSTRG.13254.3	1.04397	4.2648	4.20849	4.85805	2.92155	1.66996	3.74572	5.94085	4.52588	-
MSTRG.13256.1	8.33521	3.9144	0.837711	3.96032	10.9836	16.5261	2.11337	3.38656	1.60655	-
MSTRG.13260.4	0.068927	1.00721	0.013083	0.225583	2.2145	3.84293	0.055367	1.67293	0.734798	-
MSTRG.13262.1	1.682	1.05991	1.65221	1.01504	1.86016	2.57696	1.5515	2.08916	1.81074	-
MSTRG.13262.2	1.03597	1.69045	1.64343	1.09067	2.22485	1.30215	1.60036	1.73251	2.00464	-
MSTRG.13262.3	1.97606	2.41524	1.44051	0.5705	2.10378	3.70509	2.24704	2.89075	3.24313	-
MSTRG.13262.4	1.15583	0.507531	0.940151	1.92983	2.32333	1.02342	1.57812	1.38048	1.13464	-
MSTRG.13263.1	1.688	1.00263	1.10248	1.43697	2.33234	3.9694	2.01231	1.05066	2.0431	-
MSTRG.13263.2	1.22195	1.4722	0.728933	1.09265	2.45661	0.097613	0.169958	0.671127	0.067167	-
MSTRG.13267.2	0.203421	1.27823	0.365584	0.327513	3.37497	0.220108	0.574031	0.45924	0.207049	-
MSTRG.13269.1	2.22408	2.1034	2.00731	1.80375	2.44991	0.868899	1.50651	6.80722	1.72301	-
MSTRG.13270.1	7.2434	1.67906	1.49323	0.743614	0.087317	0.137178	0.557526	0.236758	1.66491	-
MSTRG.13275.1	2.26464	5.1456	3.24393	5.09222	2.0159	1.00496	0.325976	0.70617	1.19076	-
MSTRG.13280.1	0.612604	0.609699	3.68139	0.721866	0.497262	0.570981	0.943627	0.486469	0.370675	-
MSTRG.13282.1	0.265537	0.899805	0.831535	0.314228	2.97148	1.06085	0.458348	0.471475	0.426663	-
MSTRG.13282.2	0.188237	2.31921	1.22036	0.266138	5.26973	1.56897	0.695951	0.697605	1.075	-
MSTRG.13282.3	11.3501	18.4982	23.7952	39.8915	44.5461	49.0528	15.2162	15.5769	13.9119	-
MSTRG.13282.4	7.70216	13.1542	16.3158	30.6674	27.8562	37.7538	10.4966	10.2237	13.207	-
MSTRG.13282.5	18.6339	38.2917	37.4622	68.0596	80.5678	78.3232	29.635	19.5997	28.1859	-
MSTRG.13282.6	1.53468	3.17025	3.18323	7.09126	13.6065	9.89721	2.88245	3.62087	2.86566	-
MSTRG.13283.1	2.65413	2.30028	2.7835	5.09409	6.29056	14.0963	3.48985	12.1432	0.059659	-
MSTRG.13286.1	3.2744	3.87799	3.64701	7.23515	14.7756	10.193	4.89229	4.91974	4.76007	-
MSTRG.13287.1	1.79607	0.629127	0.505525	0.727385	0.813637	3.30908	0.463997	0.650771	0.577653	-
MSTRG.13287.10	2.19728	2.30776	2.84901	0.769893	1.88685	1.89251	1.68026	3.11288	2.41833	-
MSTRG.13287.11	4.75796	7.1003	9.85812	1.65587	1.96607	1.60356	10.5196	3.51985	8.3235	-
MSTRG.13287.12	3.29554	3.32329	1.98953	2.80512	2.35808	5.32668	4.69863	5.37452	3.07982	-
MSTRG.13287.2	2.61173	0.612608	0.102284	0.552383	0.562128	1.23467	2.05714	1.98268	0.763897	-
MSTRG.13288.1	85.3846	76.0319	62.7313	69.4734	55.6722	73.5255	86.0039	85.3381	83.0612	-
MSTRG.13289.1	0.972426	0.552535	0.276524	2.12496	2.52504	3.50688	0.988408	2.01885	1.09833	-
MSTRG.13291.2	17.4856	1.48961	25.7027	1.08909	29.3208	6.07821	26.7204	25.3278	14.0531	-
MSTRG.13303.3	11.5471	17.5495	18.0786	20.8035	22.6676	20.2139	16.9312	16.2102	13.5723	-
MSTRG.13308.1	1.00896	0.810823	0.593905	1.17842	1.84438	1.08416	1.07269	0.941083	0.941803	-
MSTRG.13309.2	22.6189	17.6304	22.2267	34.1744	15.2029	19.6996	20.8543	15.6084	16.4523	-
MSTRG.13311.1	0.93083	0.881683	1.92374	0.714029	1.9545	3.44166	1.30611	0.039472	2.64649	-
MSTRG.13316.1	1.9038	3.39122	3.77721	2.37129	1.71772	2.31126	3.15933	4.33779	2.01989	-
MSTRG.13316.2	3.06763	3.61301	4.43054	3.10122	0.251584	0.059267	2.93333	3.63228	5.57155	-
MSTRG.13319.2	3.81768	1.86116	3.14761	2.41443	0.92999	0.850329	1.53564	3.63877	2.10942	-
MSTRG.13332.5	0.270114	2.47603	1.13519	0.782419	6.54554	0.150318	0.35775	0.210417	0.52183	-
MSTRG.13333.2	4.32331	6.06994	4.89189	4.29852	8.19719	5.41759	5.13707	1.51326	5.69975	-
MSTRG.13333.4	0.198367	0.070139	0.274611	0.110674	0.159589	0.059241	0.018475	9.76938	2.16154	-
MSTRG.13334.2	0.240526	0.259125	2.15321	2.03884	2.60304	0.111611	0.15261	0.435274	0.69415	-
MSTRG.13334.6	0.43319	0.123019	0.031916	0.027095	1.28112	0.123798	0.107189	0.275851	0.061564	-
MSTRG.13335.1	16.6693	15.1823	17.7595	28.7076	24.9849	25.4052	18.6736	23.5964	21.4894	-
MSTRG.13338.1	1.26125	1.59559	1.9481	2.13896	0.991422	1.59623	1.29529	2.29436	1.66749	-
MSTRG.13339.1	1.26786	1.57554	1.12518	3.15246	4.46401	2.19027	1.66717	2.65019	1.89529	-
MSTRG.13340.1	65.2512	18.4803	0.175936	27.6639	18.2848	64.1949	18.6589	27.5394	51.4913	-
MSTRG.13342.1	10.1519	10.5594	12.8796	9.80424	8.54848	16.5992	6.39786	11.8857	9.8073	-
MSTRG.13345.2	1.17369	0.840422	0.478229	0.917049	0.089419	4.45622	1.48412	0.765809	1.54239	-
MSTRG.13347.1	0.492186	14.4131	7.32557	0.545861	1.55445	28.3457	0.369754	0.366905	0.032211	-
MSTRG.13348.1	1.00584	3.59633	1.30355	1.31745	13.7043	1.70079	0.972718	1.00299	1.3512	-
MSTRG.13349.1	5.10139	3.00257	2.56215	0.339582	14.6612	1.46514	3.23225	6.46865	0.34421	-
MSTRG.13349.2	12.4109	5.62663	2.84816	2.0188	1.93669	1.60742	10.135	7.61732	2.24649	-
MSTRG.13349.3	0.684816	3.11491	0.983311	0.849329	5.07046	0.785038	2.23047	2.87537	1.5131	-
MSTRG.13350.1	5.83115	11.201	9.4803	2.22158	1.12444	0.795722	4.84149	2.95127	2.82974	-
MSTRG.13350.2	1.72707	5.70495	1.592	0.427621	0.164435	0.299986	0.384249	2.38585	2.11161	-
MSTRG.13350.3	4.51479	11.3086	4.5417	1.68714	0.207771	0.433265	3.40561	3.34049	3.08687	-
MSTRG.13353.1	1.29532	1.44153	1.45925	2.79536	4.04111	3.17432	2.23438	1.52243	1.44404	-
MSTRG.13366.1	0.40956	1.03657	0.8192	1.31859	1.20904	2.42333	0.278987	0.434994	0.340009	-
MSTRG.13366.2	0.050504	0.886912	0.577872	0.048078	6.62997	0.447927	0.066938	0.128555	0.092799	-
MSTRG.13369.1	1.52105	2.29299	3.03237	2.73204	2.50564	4.10861	1.21492	2.51145	1.52346	-
MSTRG.1337.1	4.22423	9.6982	3.99832	10.8809	2.92692	2.80378	5.62863	7.42909	4.62251	-
MSTRG.1338.1	0.096816	0.744303	0.361625	0.177677	2.4364	0.344489	0.119574	0.071043	0.188008	-
MSTRG.1338.4	1.00028	0.080892	0.035806	2.20541	0.686212	8.70874	0.794904	0.050576	1.54838	-
MSTRG.13382.1	2.17924	1.6182	1.50463	0.622623	0.530905	0.712656	1.24029	0.966808	1.05057	-
MSTRG.13383.1	0.066051	4.24534	4.04968	0.04431	21.1258	1.14921	0.126794	0.278754	0.10501	-
MSTRG.13385.1	0.507204	1.03831	1.32845	0.695014	0.794301	1.75972	0.265616	0.881829	0.888941	-
MSTRG.13388.2	5.66838	3.90659	1.80956	8.12441	1.40908	5.58984	5.48074	6.29462	4.49757	-
MSTRG.13388.3	1.10127	1.59412	2.41791	1.92492	3.29582	2.70219	2.68142	3.34002	3.61137	-
MSTRG.13393.1	1.71792	2.15885	1.82864	2.419	1.52431	2.72331	1.07534	1.39485	2.01747	-
MSTRG.13399.1	0.957336	1.16724	4.98761	0.836973	15.2421	1.01559	0.909543	0.567096	0.980513	-
MSTRG.13400.1	4.05798	1.32011	1.38091	6.60453	5.60398	6.46662	5.34315	4.64739	1.58007	-
MSTRG.13405.1	0.02072	4.61995	11.0214	0.005291	29.7146	5.8955	0.271399	0.245416	0.082683	-
MSTRG.1341.1	0.47047	1.11746	2.76664	0.538	5.10844	1.33015	0.509112	0.47012	0.810836	-
MSTRG.13410.1	3.41708	2.71513	2.45347	1.3141	2.14891	3.55888	2.31041	1.78144	1.42412	-
MSTRG.13415.2	4.20942	0.051472	3.81498	5.09371	0.163052	6.98535	0.02632	1.88998	2.47081	-
MSTRG.13417.1	2.91152	2.02263	1.24611	1.09493	1.35448	1.91523	4.02779	2.66745	2.1124	-
MSTRG.13423.1	1.5834	1.58829	0.861706	2.53526	1.91237	1.85052	1.42589	0.897763	1.32457	-
MSTRG.13426.2	1.2405	1.08412	3.32143	2.66259	2.40083	4.04625	2.33544	1.166	0.833445	-
MSTRG.13437.3	0.715553	0.022297	4.50979	0.024171	1.68534	3.25325	0.995245	0.02188	0.013147	-
MSTRG.13437.4	0.067238	0.359736	8.53888	0.957979	4.71664	0.671588	0.710481	0.486716	0.63623	-
MSTRG.13437.6	1.25474	2.41311	0.32209	0.993035	6.41193	0.013146	0.000984	3.01243	2.21021	-
MSTRG.13439.2	0.723612	4.0782	1.3657	9.62755	1.45982	1.40573	4.00634	4.88346	3.99486	-
MSTRG.1344.2	0.384415	0.187251	0.425904	0.534119	0.872703	2.98921	0.614391	1.13008	1.30379	-
MSTRG.13445.1	0.027219	0.001514	0.012014	0.025222	4.90657	0.05985	0.013657	0.019095	0.047731	-
MSTRG.13447.1	6.54082	4.29672	4.22302	4.50075	4.71846	2.06186	3.3517	3.56811	4.57	-
MSTRG.13447.3	0	0.373982	0.294849	0.351104	1.20955	4.84255	0.288307	1.17429	0.394692	-
MSTRG.13449.2	4.66418	4.53812	4.71042	11.1334	6.54887	3.87088	3.46206	3.2925	4.26951	-
MSTRG.13453.1	10.748	17.1095	16.5309	17.4428	18.4292	24.5088	15.9057	15.1974	19.7908	-
MSTRG.13458.1	0.476943	0.638057	0.685946	1.68915	1.15334	1.85589	1.2625	1.01043	1.83186	-
MSTRG.13472.1	10.7574	7.51923	6.11441	13.3823	2.3623	7.99471	14.9176	16.5555	13.2764	-
MSTRG.13472.3	0.548809	0.806691	1.0503	1.97961	4.54294	1.3957	0.933318	1.74115	2.06173	-
MSTRG.13477.1	8.77726	8.91145	7.20551	11.2051	8.74053	10.0547	10.1667	10.4995	12.7464	-
MSTRG.13478.2	0.058199	6.44198	0.45987	0.160411	0.049268	6.26262	0.03639	0.015736	0.575686	-
MSTRG.13478.3	1.55926	2.97611	5.41969	2.20896	1.07698	0.406955	2.12017	2.34153	3.02395	-
MSTRG.13478.4	2.39868	0.123508	3.69654	2.1445	0.09879	0.029249	0.053119	0.116375	3.97915	-
MSTRG.13486.1	0.089407	0.66955	0.644734	0.606153	5.72795	0.356065	0.080236	0.39206	0.375488	-
MSTRG.13488.1	2.54766	1.67463	0.524665	1.19819	1.45625	0.208382	1.16048	2.32292	2.22549	-
MSTRG.13490.2	2.93425	2.36158	5.90842	6.49842	4.15402	4.02879	4.08768	4.72804	6.12109	-
MSTRG.13493.2	5.94592	5.52717	3.98729	9.22707	4.84561	4.88036	8.06684	8.90228	10.1601	-
MSTRG.13494.1	0	1.60794	1.37992	0.022432	7.91126	0.723753	0.020001	0.086917	0.068485	-
MSTRG.13496.1	1.10696	0.12387	0.847959	3.11206	3.0398	2.60069	0.785033	1.11892	1.54853	-
MSTRG.135.1	3.13771	2.45336	2.62801	1.38649	1.07633	1.86136	3.34471	1.93357	3.77324	-
MSTRG.13500.1	2.82096	2.61888	6.94645	2.31813	6.18883	2.58935	2.83231	3.9622	4.0398	-
MSTRG.13501.2	12.6175	9.58936	14.0033	14.3009	14.9062	17.4116	2.36408	18.1827	12.6256	-
MSTRG.13502.2	0.280162	0.502542	0.62454	12.0275	8.33982	1.87279	0.810576	3.01409	9.09717	-
MSTRG.13508.1	0	27.1973	39.9513	34.0492	40.6148	31.1721	29.5957	33.328	28.7243	-
MSTRG.13508.2	0.170602	5.74951	3.3736	3.60565	0.575111	6.92613	0.557962	0.652115	1.48913	-
MSTRG.13512.1	1.14259	0.83271	1.12371	0.817587	0.433749	1.03357	1.40503	1.09917	1.22929	-
MSTRG.13512.2	2.3976	2.4691	0.78121	3.52033	0.058162	3.14863	0.133535	3.32551	4.07747	-
MSTRG.13512.4	0.433156	0.601115	1.00335	0.446125	1.68337	1.10379	1.31658	0.645019	0.803722	-
MSTRG.13512.5	0.599303	0.881061	0.812802	0.299437	0.74379	0.882012	1.30616	0.700434	0.774019	-
MSTRG.13512.6	1.86002	0.593184	0.865091	1.53296	5.6613	1.2954	2.91178	0.740932	0.993455	-
MSTRG.13515.2	7.61982	13.5297	11.2321	21.2636	19.1251	8.44386	8.51266	10.8327	10.8632	-
MSTRG.13516.1	9.08937	8.15517	6.62102	6.58843	4.69151	12.7332	7.65725	7.7147	7.87098	-
MSTRG.13516.2	29.0264	30.7264	32.3118	53.1874	40.8869	0.01809	31.1627	40.5765	39.3023	-
MSTRG.13519.1	11.1874	11.9708	73.4544	40.827	31.7708	124.732	12.9531	77.8927	15.649	-
MSTRG.13520.1	9.43226	13.1149	13.9422	13.1506	12.9039	4.83879	10.9463	13.0329	12.7311	-
MSTRG.13523.1	24.2815	26.9853	24.1526	23.7189	18.8574	18.4512	21.0953	23.6511	24.9184	-
MSTRG.13524.1	2.00761	6.49204	7.43153	9.34384	14.1449	3.73398	4.66059	3.58281	15.4513	-
MSTRG.13526.1	0.400444	0.599453	0.396232	1.59274	1.85147	2.15336	0.65418	0.75975	0.344043	-
MSTRG.13530.1	1.71572	2.17337	1.48675	1.37545	2.05324	3.95905	0.472426	1.04634	0.792224	-
MSTRG.13541.1	2.0515	1.19487	1.24462	2.37638	3.87572	0.972333	1.9261	1.06896	1.85055	-
MSTRG.13543.2	15.7806	20.8861	23.9287	4.45543	0.284651	24.7696	12.5409	17.0545	18.6405	-
MSTRG.13545.1	1.14049	1.52508	2.32984	1.41674	6.15308	1.63977	1.03903	0.844104	0.806951	-
MSTRG.13551.1	61.9657	46.9402	20.1722	23.3491	5.69932	28.3724	63.6152	44.326	42.9486	-
MSTRG.13551.2	8.37336	7.03164	6.46468	3.18789	1.07968	17.3916	8.72721	7.57265	5.10179	-
MSTRG.13553.2	1.78303	4.61575	2.47856	1.37998	10.9839	3.65707	2.99256	2.72714	3.29941	-
MSTRG.13556.1	4.91551	3.11815	1.62085	7.01987	2.93206	4.52281	1.43105	0.923896	5.4071	-
MSTRG.13557.1	10.0629	3.80278	10.2034	2.56657	6.33956	3.30937	7.11206	6.1189	12.0414	-
MSTRG.13557.2	7.95342	10.0143	14.2477	2.40346	5.17867	2.81479	27.1077	22.4576	0.41339	-
MSTRG.13560.1	13.2792	15.4342	14.3709	24.9382	23.6404	19.6939	14.6579	15.6115	17.1959	-
MSTRG.13561.1	5.73577	5.28008	4.73186	3.90273	2.41746	3.80181	4.45626	4.26651	4.5151	-
MSTRG.13564.6	0.701109	0.938839	0.791809	0.815452	1.9453	2.00895	0.874522	0.551353	1.02215	-
MSTRG.13565.1	3.23976	0.564742	0.284367	1.37323	0.2392	0.27955	0.008408	0.626357	0.658534	-
MSTRG.13565.10	5.98388	10.6594	17.6709	1.41314	3.62447	1.96855	5.02967	7.61104	4.10776	-
MSTRG.13565.5	0.862077	4.74028	3.88928	1.34978	0.742272	2.03899	1.15878	3.62207	3.50444	-
MSTRG.13565.6	3.3569	6.1899	2.99837	2.87518	2.01436	2.58388	4.12247	4.26756	5.92614	-
MSTRG.13565.8	1.66404	1.09951	1.39978	0.608574	0.254885	1.50853	3.59035	0.756721	1.30376	-
MSTRG.13565.9	3.24724	7.8281	1.22087	8.33895	2.73557	8.85978	0.671868	8.59195	8.80063	-
MSTRG.13566.1	1.88592	4.17783	1.67775	1.36965	5.43773	5.28041	0.564742	0.784694	5.86997	-
MSTRG.13574.1	1.20704	1.37675	1.00018	1.63527	1.48405	1.20715	1.17719	2.1708	1.32235	-
MSTRG.13575.1	0	2.63054	11.1097	0.024313	14.4675	5.62586	0.184715	0.186768	0.066439	-
MSTRG.13576.1	0.042489	3.80735	8.29781	0.064338	15.5616	3.55388	0.429702	0.315012	0.172918	-
MSTRG.13578.1	0.417237	6.43637	0.550529	0.703461	0.176505	0.312603	5.72876	0.120809	0.419481	-
MSTRG.13578.2	3.10468	18.5901	4.76725	14.0142	9.99886	14.1159	13.8687	3.337	10.1448	-
MSTRG.13578.4	2.47782	3.49617	1.97736	6.21369	4.64675	2.76075	6.74724	3.68747	5.4243	-
MSTRG.13581.1	2.30518	6.26707	4.82896	2.96525	6.27222	3.73302	1.76258	2.78974	3.68952	-
MSTRG.13585.1	13.0146	15.9597	13.152	18.1265	15.3419	17.3083	19.4604	18.5443	17.2064	-
MSTRG.13586.1	0.969971	1.17788	0.919493	2.2345	2.39687	1.55607	1.43289	1.98592	2.0505	-
MSTRG.13588.1	4.83156	5.68285	2.48676	4.9189	2.64872	3.32561	3.34425	5.3673	4.15025	-
MSTRG.13591.2	1.2795	1.91798	1.81743	2.73334	4.18107	4.49891	1.58106	2.88815	2.95712	-
MSTRG.13595.1	4.37611	4.94294	4.47207	11.0832	10.7197	10.7367	5.69442	6.40625	7.46389	-
MSTRG.13599.1	1.2435	2.51926	1.93437	2.8049	1.58487	0.195374	3.35558	1.67672	2.61904	-
MSTRG.13599.3	1.29763	3.66381	0.988337	2.5209	1.49188	2.68985	2.77521	2.0799	1.41328	-
MSTRG.13604.2	0.111397	12.4293	0.155927	7.61667	0.109388	17.4831	2.7593	4.36742	0.010713	-
MSTRG.13604.4	0.341052	4.34905	6.09399	0.75188	17.4192	1.96163	0.392976	0.644813	0.677251	-
MSTRG.13605.2	0.393893	1.5283	0.096479	1.62278	2.49831	0.116941	1.50127	1.47027	1.59481	-
MSTRG.13605.4	0.384698	0.002937	0.230914	0.109359	0.017375	2.5883	0.229016	0.038601	0.049539	-
MSTRG.13610.2	0.334565	0.274099	0.67009	0.529908	1.74148	2.86019	0.580845	0.756156	0.702909	-
MSTRG.13610.4	6.95329	9.74284	8.40913	17.1902	0.096103	7.89803	13.6645	15.6765	12.2742	-
MSTRG.13611.1	6.6359	7.92366	6.95101	11.4908	0.49419	0.315586	7.19724	8.33853	9.9298	-
MSTRG.13612.1	2.27694	1.58109	0.26797	1.90511	0.639405	1.44097	4.60906	0.4707	0.519632	-
MSTRG.13619.1	2.72195	0.798537	2.63538	3.11595	3.07251	32.6082	1.68313	2.0569	1.33379	-
MSTRG.13620.1	0.858626	1.15352	1.15307	1.49703	2.44733	0.920851	0.965411	0.98428	3.79267	-
MSTRG.13622.1	0.438854	0.670326	1.61992	0.352438	0.127162	0.645337	0.2017	0.856577	0.929895	-
MSTRG.13625.3	2.58255	0.574798	4.07353	2.79252	0.132008	3.31921	0.807652	0.788772	0.480555	-
MSTRG.13629.2	7.94842	6.89515	8.90358	8.77684	7.22335	7.83648	5.79866	7.79686	7.33641	-
MSTRG.13629.3	2.38791	3.98379	1.65322	8.08545	7.68143	3.73691	2.19571	4.43333	6.40016	-
MSTRG.13629.4	1.46696	0.502248	2.00368	1.05142	0.93701	2.0766	1.78517	2.95838	0.759921	-
MSTRG.13630.2	5.20473	5.2072	6.06186	5.71632	4.23276	6.08507	7.58954	3.99148	8.49431	-
MSTRG.13630.3	2.88926	3.12837	3.57658	1.16761	10.6413	0.963891	1.20917	1.82503	0.44073	-
MSTRG.13630.4	0.585494	4.82769	0.093707	0.047461	0.071993	4.76654	2.01241	0.668336	0.069494	-
MSTRG.13631.1	0.458761	0.665694	0.787319	1.7659	1.56465	1.03113	0.498058	0.578531	0.794232	-
MSTRG.13638.17	0.421637	0.754835	0.547432	0.609803	1.72712	0.00908	0.887602	1.33633	1.00801	-
MSTRG.13638.18	0.404354	0.585782	0.600854	0.575138	1.28439	0.567048	0.426069	0.713716	0.670583	-
MSTRG.13638.19	0.752325	1.22768	1.10416	0.70917	2.11165	0.025178	1.29302	1.58633	1.38618	-
MSTRG.13638.2	1.52281	2.61489	2.07238	1.25767	2.81599	0.513256	2.07916	3.60032	1.71818	-
MSTRG.13638.20	0.212417	0.112184	0.908803	0.221375	0.33172	1.29517	0.289292	1.10798	0.211606	-
MSTRG.13638.21	1.14231	1.23147	1.77562	1.2903	2.72868	13.821	1.48636	2.29747	1.47362	-
MSTRG.13638.3	1.39738	2.15863	2.22619	0.83748	1.99828	0.478052	1.79388	2.03101	2.54158	-
MSTRG.13638.4	0.673166	0.744298	0.579583	0.715565	1.19121	0.475561	1.25609	1.02014	0.411628	-
MSTRG.13638.5	1.95065	1.27095	2.14399	2.22226	2.81278	0.847118	2.2021	2.49485	2.33068	-
MSTRG.13638.6	0.673025	0.356338	0.124602	0.021564	1.4559	0.19395	0.014815	0.058488	1.90553	-
MSTRG.13638.7	0.028043	0.061809	0.060861	0.019933	0.051108	0.033971	0.804284	0.066503	1.03357	-
MSTRG.13638.8	0.282563	1.38284	0.059937	0.160585	1.27971	0.471438	1.82326	1.84585	1.06669	-
MSTRG.13638.9	0.542394	0.534353	0.611014	0.60511	0.77932	2.25123	0.546722	0.755567	0.646548	-
MSTRG.13640.1	3.59813	2.60892	4.17448	3.92268	1.83809	2.86704	3.16837	2.99943	4.58236	-
MSTRG.13642.2	0.509777	3.09194	2.19634	0.611213	11.3816	1.43701	0.110419	0.741676	0.937421	-
MSTRG.13644.1	0.930381	1.81937	2.99089	2.20081	18.0079	4.14587	1.17265	1.0529	2.16831	-
MSTRG.13647.1	1.14201	1.17152	1.66261	6.46942	1.93801	9.51809	1.73402	1.46214	1.81739	-
MSTRG.13656.2	1.76784	1.83646	1.38123	3.33645	5.27291	3.81879	3.3305	3.24353	2.63965	-
MSTRG.13656.3	1.08818	1.66591	0.515273	3.74376	1.76218	4.72478	1.88024	2.58489	1.50689	-
MSTRG.13657.2	0.548092	0.688368	0.098108	0.034869	0.042957	0.088304	0.251487	1.32108	0.150186	-
MSTRG.13657.4	1.18174	2.17722	1.38545	0.388604	0.760198	0.221553	0.826834	0.573762	0.728935	-
MSTRG.13657.6	0.024952	0.344839	0.233146	1.73132	0.099836	2.01169	0.187957	1.55408	0.226368	-
MSTRG.13657.7	0.010339	2.07675	0.806027	0.575336	0.472333	0.210868	0.512826	1.34801	0.739673	-
MSTRG.13658.1	23.2879	6.42766	4.65344	5.57224	9.08221	1.44075	9.57685	9.41763	10.3008	-
MSTRG.13658.5	1.71497	31.3682	41.533	1.39743	1.44495	46.537	40.2241	43.0058	30.6591	-
MSTRG.13659.1	1.46103	1.26708	1.37351	4.72669	3.58988	2.87398	1.29655	1.41838	1.53906	-
MSTRG.13661.1	7.5516	6.87797	4.64721	2.61008	2.3793	2.17294	5.58887	4.22909	5.0665	-
MSTRG.13662.2	1.53652	1.40093	0.502222	1.20954	0.803826	1.40418	0.965848	0.045268	1.20534	-
MSTRG.13663.1	1.29586	1.62574	2.7671	0.437703	5.06907	1.58429	0.731183	0.841012	0.882908	-
MSTRG.13672.1	0.723538	2.62148	2.96367	1.83811	0.921625	3.83879	0.114201	0.294935	0.204204	-
MSTRG.13673.1	0.107254	0.531327	0.217894	0.749488	0.903202	1.66482	0.154415	0.082206	0.157884	-
MSTRG.13675.1	0.413829	1.60703	2.98848	1.41464	1.1951	1.7998	0.15715	0.151606	0.086768	-
MSTRG.13682.1	0.057546	0.315035	0.504484	0.172562	1.69466	0.083221	0.055233	0.307798	0.186635	-
MSTRG.13691.1	2.174	1.61051	3.47048	1.32206	9.38108	2.09725	2.15182	1.33003	2.26243	-
MSTRG.13691.2	3.97152	2.971	3.95995	5.51998	3.49864	6.26804	3.41148	2.31013	3.14388	-
MSTRG.13692.2	5.42835	4.85517	5.89626	6.40678	5.68753	3.92225	6.13721	5.77254	0.120834	-
MSTRG.13695.1	23.7133	22.5134	15.5164	9.50937	2.37808	1.89064	5.68366	3.03774	5.63856	-
MSTRG.13702.1	3.52402	1.88613	2.44078	4.73202	6.4603	4.10079	1.36776	2.51699	2.00951	-
MSTRG.13702.2	2.13861	2.2399	1.9221	2.25386	0.161564	6.28303	4.29538	3.06428	3.2935	-
MSTRG.13703.2	1.56346	4.06321	1.92891	0.930087	1.48426	0.399292	1.11571	2.7788	5.79944	-
MSTRG.13716.3	9.17885	9.96805	23.1533	6.32382	16.8862	28.5138	22.7877	7.26514	10.5122	-
MSTRG.13716.4	4.48079	4.40705	4.94231	4.24863	4.7013	2.12187	1.06274	3.77821	3.79284	-
MSTRG.13716.5	7.95924	8.25053	7.66017	5.67949	3.41695	8.37197	8.84023	7.94925	7.73486	-
MSTRG.13716.6	4.74821	4.39293	2.45869	8.60649	1.88287	4.44569	2.15205	6.38589	5.93503	-
MSTRG.13716.7	9.00023	10.8853	9.45481	8.08759	5.74045	12.6827	10.6315	10.9444	11.5805	-
MSTRG.13728.2	3.39547	3.71806	2.7353	1.83191	0.069696	1.17153	1.59011	0.07047	0.006252	-
MSTRG.13728.4	0.81669	0.138968	0.987444	1.56035	1.08039	2.89402	0.234918	3.18728	0.995738	-
MSTRG.13729.1	1.16709	1.02209	17.3602	22.0606	18.237	0.294292	16.8334	0.435675	0.866598	-
MSTRG.1373.1	21.8947	19.1289	21.6158	64.7727	85.8239	35.0066	27.8984	35.1262	29.3747	-
MSTRG.13730.1	2.86252	1.85657	1.54863	1.20891	1.27852	0.781524	3.3175	1.32973	2.23886	-
MSTRG.13734.1	2.2092	1.74519	1.68641	1.32137	1.49314	1.39627	3.35835	2.14875	1.5355	-
MSTRG.13736.1	4.21471	7.86862	1.69376	5.36624	3.00544	9.73561	7.57568	1.82609	3.55207	-
MSTRG.13736.2	1.2308	0.058157	1.5322	0.660861	6.22427	0.003518	0.558944	0.017304	3.14858	-
MSTRG.13737.1	2.45769	2.45318	2.44334	3.63409	2.22023	1.37078	2.06758	2.53196	2.88716	-
MSTRG.13740.2	3.47771	3.07144	1.51689	1.92095	3.7637	3.71423	3.46716	2.93151	1.62849	-
MSTRG.13741.1	0.734306	2.42631	1.01727	5.63999	0.628154	6.52568	2.54655	1.42012	2.10958	-
MSTRG.13742.1	10.1308	2.05202	0.789862	11.7173	8.17764	9.35664	1.83665	12.9292	12.2554	-
MSTRG.13742.4	0.5088	4.07455	4.84282	1.60144	3.9611	5.09215	1.89917	0.464441	0.707475	-
MSTRG.13742.5	2.43173	3.09344	3.25236	2.85897	1.29943	1.3416	5.42418	2.86953	3.5261	-
MSTRG.13750.1	0.078981	0.572772	1.73272	0.039738	4.81699	0.682167	0.037903	0.041909	0.041855	-
MSTRG.13753.1	10.3805	8.09259	9.42556	3.496	8.1403	7.29674	8.86556	6.73211	6.87615	-
MSTRG.13754.1	4.01358	21.7515	21.1127	15.0742	16.2088	2.41142	15.9463	13.768	18.5436	-
MSTRG.13761.2	3.5973	2.77479	4.00906	2.55429	2.72694	2.72027	2.59654	2.57318	3.79531	-
MSTRG.13762.3	5.53095	0.895021	14.9122	9.34558	8.55715	7.05106	3.74434	3.61531	15.5336	-
MSTRG.13762.4	1.03894	6.88683	0.422318	0.168664	4.03046	0.338456	0.659003	0.137579	0.167867	-
MSTRG.13765.4	0.568891	0.932493	5.87453	2.70605	1.47912	2.85097	1.08971	1.47602	3.98995	-
MSTRG.13765.5	0.612625	0.972938	1.97077	0.987355	1.57579	3.73021	0.973074	2.93919	1.68887	-
MSTRG.13765.6	2.71652	4.16652	3.59635	4.16535	3.20721	5.84698	4.39991	5.97058	5.98385	-
MSTRG.13768.1	13.4766	5.02151	17.6511	4.13417	14.2938	22.5226	5.10352	13.4055	6.89044	-
MSTRG.13768.3	1.94777	9.52121	1.00778	15.3012	0.817521	3.22748	11.1918	3.75436	12.7958	-
MSTRG.13768.4	0.332533	1.80644	0.787796	1.19259	6.96982	0.674946	1.69483	0.483458	1.14767	-
MSTRG.13768.5	0.696631	3.40577	0.221705	6.64662	1.94107	0.359587	1.9466	1.08021	2.2009	-
MSTRG.13770.1	0.68487	0.512551	0.970333	1.01	3.84554	2.66059	0.297454	1.09335	0.651014	-
MSTRG.13771.1	1.25272	4.09279	3.7538	3.69895	20.1244	3.29903	1.01826	2.15244	2.81776	-
MSTRG.13771.2	0.481775	0.556717	1.56904	2.0956	6.71362	1.52413	0.931051	0.897765	0.984461	-
MSTRG.13773.1	0.472177	0.420723	0.236875	0.277328	1.40917	0.101015	0.400301	0.080104	0.754122	-
MSTRG.13773.2	0.90992	1.45036	1.3041	0.883256	1.90977	0.990222	0.552096	0.934042	1.06666	-
MSTRG.13773.4	0.418038	0.418572	0.869092	0.350029	2.13413	1.84396	0.581775	0.207284	0.793933	-
MSTRG.13774.1	0.224493	0.350682	1.1965	0.563458	0.358123	0.867899	0.456087	0.460948	0.959604	-
MSTRG.13778.4	0	1.04885	0.215636	0.423101	0.382868	0.309335	1.73828	1.20892	1.02766	-
MSTRG.13782.1	0.039623	4.45481	3.34793	0.079743	21.8267	1.29857	0.012677	0.044153	0.084132	-
MSTRG.13784.1	1.66091	2.48184	1.91194	1.06052	0.590637	0.519049	1.08575	1.80142	1.20806	-
MSTRG.13787.1	0.002758	1.81055	4.80605	0.032645	7.30342	1.71532	0.283664	0.137026	0.171577	-
MSTRG.1379.1	14.9792	20.2992	22.7943	4.38828	8.44838	9.23016	10.8361	13.1545	10.8123	-
MSTRG.1379.2	5.79068	8.60852	10.1389	3.91163	5.43635	6.92607	4.95602	5.65416	7.31557	-
MSTRG.13799.1	0.108911	0.170686	0.131581	0.15963	1.63185	0.14394	0.202777	0.204571	0.298409	-
MSTRG.138.1	1.31785	1.56872	2.02137	1.72269	5.23655	0.058967	0.488052	0.820722	2.6306	-
MSTRG.13800.1	1.99931	2.38752	1.95961	9.02786	10.779	6.63742	2.66021	1.29455	3.80734	-
MSTRG.13803.1	7.43795	6.58762	7.87784	8.37271	5.69152	5.91859	8.3325	7.99286	8.09501	-
MSTRG.13803.2	3.68713	4.37365	3.64927	3.2573	3.54853	3.46972	2.906	3.01214	3.52482	-
MSTRG.13803.4	0.253018	0.321623	0.87063	0.589672	2.56207	3.58923	0.637875	0.656379	0.609607	-
MSTRG.13804.1	6.22657	3.10753	3.48835	4.75115	2.16241	3.32194	3.94569	5.29716	3.79669	-
MSTRG.13804.2	1.64019	1.29696	3.76097	7.01112	5.4954	2.67514	4.03535	4.02259	6.84393	-
MSTRG.13804.3	0.799643	1.7023	1.39352	2.05944	2.05824	2.41078	1.44875	1.42311	1.63248	-
MSTRG.13804.4	2.24567	5.90822	2.59473	5.00971	5.69178	10.7552	1.77109	1.72549	1.43481	-
MSTRG.13805.1	0.168767	0.707282	1.54713	0.435108	1.28978	0.361602	1.2508	0.222633	1.33234	-
MSTRG.13805.3	5.49988	4.28767	10.4149	3.32654	6.61885	1.09645	6.18272	9.30961	9.25575	-
MSTRG.13807.1	0.619087	0.40139	0.803571	1.58001	0.487222	1.78995	1.57319	0.738627	1.3286	-
MSTRG.13807.2	1.19837	2.46655	2.33867	2.44383	3.44082	2.29083	2.73671	2.34123	2.90599	-
MSTRG.13808.1	1.35322	2.88454	2.90702	2.50842	10.973	3.58928	2.38275	2.63901	2.47268	-
MSTRG.13822.1	0.87659	1.37741	0.85518	0.948728	1.08967	2.39461	1.27317	1.37486	0.714989	-
MSTRG.13824.1	0.459614	0.831569	1.52279	0.4249	0.312162	2.29878	0.482712	0.550756	0.567043	-
MSTRG.13828.2	1.71879	2.62509	0.064379	0.283931	3.33942	0.774408	0.803602	0.132975	0.214692	-
MSTRG.13828.3	1.10953	0.007053	4.78908	5.13665	0.145961	1.90655	0.377917	2.0668	1.90818	-
MSTRG.13833.1	6.22244	41.6666	47.0477	34.0714	30.4844	45.1642	8.71834	34.2403	33.9128	-
MSTRG.13836.1	4.48366	5.44031	8.00692	9.95005	10.7504	12.1105	7.27547	9.37167	8.85217	-
MSTRG.13837.1	146.114	114.617	107.513	71.7861	55.5339	78.7315	123.654	89.9158	98.5326	-
MSTRG.13838.1	8.26392	8.63208	8.94716	7.57018	4.40252	6.78627	11.2845	7.97723	11.092	-
MSTRG.13839.1	1.08211	0.771937	0.680123	1.02154	0.670712	0.831772	1.82716	1.64265	1.48566	-
MSTRG.13840.1	1.31587	1.41163	1.75296	2.00713	2.89444	2.8082	1.60368	1.81641	2.17709	-
MSTRG.13842.1	0.262655	0.339952	0.423911	0.050391	1.87045	0.263627	0.120162	0.143225	0.251845	-
MSTRG.13843.1	3.84913	3.98622	3.69108	4.11946	3.81573	5.44661	5.01812	4.65618	4.45163	-
MSTRG.13844.1	2.8548	4.31084	7.15844	8.34157	9.90703	10.8416	3.897	5.30988	4.96026	-
MSTRG.13845.1	3.20719	4.88662	5.88539	10.9545	7.50601	11.7736	4.36745	5.99526	6.7543	-
MSTRG.13846.1	0.728359	0.752238	0.35518	0.7479	0.666224	1.59764	0.879325	0.427044	0.631743	-
MSTRG.13847.1	3.82958	3.09927	1.32687	1.91413	1.9447	2.46293	4.29488	3.19481	2.7302	-
MSTRG.13848.1	1.02864	1.56339	0.862772	0.963813	1.66394	1.0442	0.839532	0.667229	0.861741	-
MSTRG.13849.1	12.5752	25.0841	16.22	17.8398	24.5089	33.0787	18.6755	17.9807	16.3763	-
MSTRG.13850.1	0.242045	0.284523	0.061559	0.385976	0.550029	1.91975	0.599277	0.666322	0.293087	-
MSTRG.13856.1	1.11965	0.810395	1.73617	2.50243	2.3961	0.47807	0.524232	0.285057	0.391787	-
MSTRG.13856.2	3.59904	3.09781	5.11331	0.291089	0.251302	4.95725	3.36058	2.13191	3.87401	-
MSTRG.1386.3	6.12943	6.97268	9.87225	16.5495	1.7812	30.8591	5.24349	9.87273	11.0125	-
MSTRG.13862.1	3.08143	1.56351	2.65294	13.2997	3.05382	12.7877	3.43531	3.78688	2.67629	-
MSTRG.13862.3	2.56404	3.95206	0.560211	3.55615	3.41674	0.861063	7.21685	5.60013	0.660878	-
MSTRG.13863.1	27.6896	29.1693	25.4268	30.8784	21.4916	8.83223	26.8994	26.6632	30.989	-
MSTRG.13864.1	7.45936	7.88672	12.4144	18.0772	16.3397	13.4667	5.81274	9.90436	8.93284	-
MSTRG.13866.2	10.3199	11.9697	8.97233	19.0232	14.4472	7.19006	12.5652	15.6523	8.46696	-
MSTRG.13866.3	0.257219	0.385583	0.400218	0.441345	4.10442	0.382636	0.32822	0.199911	1.63084	-
MSTRG.13868.1	0.275278	0.947429	1.25428	8.54375	6.2428	4.31755	0.198161	0.558477	0.237057	-
MSTRG.13872.1	3.95601	3.69741	11.2301	2.12761	7.17599	11.1686	8.71198	6.01308	13.4103	-
MSTRG.1388.1	0.662576	0.651387	0.869864	3.7195	7.41021	2.06852	1.29455	1.09397	0.875032	-
MSTRG.13881.1	1.72074	2.46674	3.25761	5.83602	2.91327	7.2262	1.7605	2.31716	2.46116	-
MSTRG.13888.1	0.287028	0.347043	0.446714	2.54052	0.347368	0.142887	0.220394	0.912614	0.669275	-
MSTRG.13889.1	0.652552	0.932178	1.31742	5.76048	1.07383	0.368451	0.685289	1.02347	1.91996	-
MSTRG.1389.1	15.4459	10.3423	13.9872	20.7435	19.6197	21.6259	16.1697	18.1167	13.6212	-
MSTRG.1389.2	0.852878	3.83938	0.453458	0.936174	1.85854	0.593421	3.23695	2.38071	0.974055	-
[truncated: 39,993 more rows]
