# Supplementary material for: Transcriptional Landscape of Pathogen-responsive Lncrnas Reveals OS_LNC1812-Induced Disease Resistance by Abscisic Acid Pathway in Rice
Source: Research Square preprint supplement (doi:10.21203/rs.3.rs-244393/v1), 2021-03-01
Supplement: Supplementary file 9 [file aa07b00903405f93e3ea4a15.xlsx]

## Sheet: RBSDV_KEGG
#PathwayID	PathwayName	GenesName	S gene number	B gene number	Pvalue	Qvalue	PathwayLink
ko01200	Carbon metabolism	OS04T0234600-01|OS06T0303400-00|OS03T0645100-01|OS03T0645100-03|OS03T0645100-02|OS06T0149700-00|OS06T0149900-01|OS04T0234600-03|OS04T0234600-02|OS10T0356000-00|OS01T0118000-01|OS01T0743500-01|OS12T0409000-01|OS03T0776000-01|OS08T0502700-03|OS08T0502700-01	16	408	0.00304166	0.023154	http://www.genome.jp/kegg-bin/show_pathway?ko01200/K01100%09red/K01601%09red/K00162%09red/K01681%09red/K00600%09red/K01623%09red/K00029%09red/K00830%09red/K01810%09red/K01738%09red
ko04075	Plant hormone signal transduction	OS05T0213500-01|OS02T0766700-01|OS03T0324300-05|OS03T0324300-04|OS03T0324300-06|OS03T0324300-03|OS03T0324300-02|OS02T0820900-03|OS02T0820900-02|OS02T0820900-01|OS05T0489700-01|OS01T0743800-00|OS03T0324200-02|OS03T0324200-01	14	305	0.00133236	0.0116952	http://www.genome.jp/kegg-bin/show_pathway?ko04075/K14496%09red/K14514%09red/K14432%09red/K14509%09red/K14490%09red
ko00940	Phenylpropanoid biosynthesis	OS07T0656200-01|OS06T0681600-02|OS06T0681600-01|OS02T0180700-01|OS06T0656500-02|OS06T0656500-01|OS12T0199500-00|OS01T0591300-01|OS01T0591300-02|OS02T0161800-01	10	268	0.00967767	0.0454542	http://www.genome.jp/kegg-bin/show_pathway?ko00940/K13066%09red/K12355%09red/K05350%09red/K01904%09red/K00430%09red/K09753%09red
ko00630	Glyoxylate and dicarboxylate metabolism	OS06T0303400-00|OS04T0659100-03|OS04T0659100-02|OS04T0659100-01|OS10T0356000-00|OS12T0409000-01|OS08T0502700-03|OS08T0502700-01	8	119	0.000789681	0.00839044	http://www.genome.jp/kegg-bin/show_pathway?ko00630/K01681%09red/K00600%09red/K01601%09red/K00830%09red/K01915%09red
ko00480	Glutathione metabolism	OS10T0529400-01|OS10T0529800-00|OS06T0127900-01|OS10T0529500-01|OS10T0530400-01|OS10T0530900-03|OS10T0530200-01|OS10T0530900-01	8	120	0.000826349	0.00839044	http://www.genome.jp/kegg-bin/show_pathway?ko00480/K10808%09red/K00799%09red
ko01230	Biosynthesis of amino acids	OS06T0303400-00|OS04T0659100-03|OS04T0659100-02|OS04T0659100-01|OS06T0149700-00|OS06T0149900-01|OS01T0118000-01|OS12T0409000-01	8	345	0.0536938	0.0923724	http://www.genome.jp/kegg-bin/show_pathway?ko01230/K01681%09red/K00600%09red/K01623%09red/K01738%09red/K01915%09red
ko03050	Proteasome	OS02T0801200-01|OS02T0801200-02|OS09T0538200-01|OS06T0607800-01|OS02T0199900-02|OS02T0199900-03|OS02T0199900-01	7	96	0.000849665	0.00839044	http://www.genome.jp/kegg-bin/show_pathway?ko03050/K03064%09red/K02731%09red/K11599%09red
ko04144	Endocytosis	OS01T0227300-01|OS01T0103000-01|OS07T0260400-01|OS02T0437800-01|OS05T0489600-01|OS02T0437800-02|OS05T0489600-03	7	236	0.0503825	0.0786957	http://www.genome.jp/kegg-bin/show_pathway?ko04144/K12198%09red/K12479%09red/K07937%09red/K07897%09red/K01115%09red
ko00250	Alanine, aspartate and glutamate metabolism	OS04T0659100-03|OS04T0659100-02|OS04T0659100-01|OS08T0502700-01|OS08T0502700-03|OS03T0699300-01	6	70	0.000715072	0.00839044	http://www.genome.jp/kegg-bin/show_pathway?ko00250/K01939%09red/K00830%09red/K01915%09red
ko00564	Glycerophospholipid metabolism	OS02T0787800-01|OS06T0204400-01|OS06T0204400-02|OS02T0119800-01|OS02T0119800-02|OS07T0260400-01	6	133	0.0092907	0.0454542	http://www.genome.jp/kegg-bin/show_pathway?ko00564/K00901%09red/K00993%09red/K01115%09red
ko00710	Carbon fixation in photosynthetic organisms	OS04T0234600-01|OS04T0234600-03|OS04T0234600-02|OS10T0356000-00|OS01T0118000-01|OS01T0743500-01	6	135	0.00978129	0.0454542	http://www.genome.jp/kegg-bin/show_pathway?ko00710/K01100%09red/K01623%09red/K00029%09red/K01601%09red
ko04141	Protein processing in endoplasmic reticulum	OS05T0301500-02|OS05T0301500-03|OS12T0612625-00|OS05T0301500-01|OS04T0464500-01|OS03T0427900-01	6	310	0.0714418	0.0948511	http://www.genome.jp/kegg-bin/show_pathway?ko04141/K12666%09red/K10597%09red/K10956%09red/K14012%09red
ko03010	Ribosome	OS02T0821200-01|OS07T0544900-01|OS10T0407100-01|OS10T0407100-02|OS03T0755700-00|OS01T0205500-01	6	371	0.0851814	0.0948511	http://www.genome.jp/kegg-bin/show_pathway?ko03010/K02911%09red/K02868%09red/K02902%09red/K02872%09red/K02903%09red
ko00196	Photosynthesis - antenna proteins	OS09T0346500-04|OS02T0197600-01|OS02T0197600-03|OS07T0558400-01|OS02T0197600-02	5	25	4.95984e-05	0.00391828	http://www.genome.jp/kegg-bin/show_pathway?ko00196/K08915%09red/K08912%09red/K08909%09red
ko00565	Ether lipid metabolism	OS02T0119800-01|OS07T0260400-01|OS06T0204400-01|OS06T0204400-02|OS02T0119800-02	5	44	0.000468688	0.00775637	http://www.genome.jp/kegg-bin/show_pathway?ko00565/K00993%09red/K01115%09red
ko00920	Sulfur metabolism	OS06T0149900-01|OS07T0558200-01|OS07T0558300-01|OS07T0558200-02|OS06T0149700-00	5	51	0.000826758	0.00839044	http://www.genome.jp/kegg-bin/show_pathway?ko00920/K01082%09red/K01738%09red
ko00195	Photosynthesis	OS06T0107700-01|OS07T0544800-01|OS04T0414700-01|OS10T0355800-00|OS01T0501800-01	5	73	0.00307548	0.023154	http://www.genome.jp/kegg-bin/show_pathway?ko00195/K02112%09red/K02716%09red/K14332%09red/K02641%09red/K08901%09red
ko00260	Glycine, serine and threonine metabolism	OS08T0424500-02|OS08T0424500-01|OS08T0502700-03|OS12T0409000-01|OS08T0502700-01	5	111	0.0119659	0.0500966	http://www.genome.jp/kegg-bin/show_pathway?ko00260/K00600%09red/K00830%09red/K00130%09red
ko00010	Glycolysis / Gluconeogenesis	OS01T0118000-01|OS03T0776000-01|OS03T0645100-01|OS03T0645100-03|OS03T0645100-02	5	196	0.0470177	0.0923724	http://www.genome.jp/kegg-bin/show_pathway?ko00010/K01623%09red/K00162%09red/K01810%09red
ko03013	RNA transport	OS10T0569200-01|OS03T0645200-01|OS02T0741500-01|OS05T0105900-01|OS04T0627900-01	5	262	0.0717383	0.0948511	http://www.genome.jp/kegg-bin/show_pathway?ko03013/K09291%09red/K03680%09red/K03113%09red/K03253%09red/K14325%09red
ko03040	Spliceosome	OS10T0457000-01|OS04T0646100-01|OS10T0457000-02|OS06T0187900-02|OS06T0187900-01	5	286	0.0783748	0.0948511	http://www.genome.jp/kegg-bin/show_pathway?ko03040/K12896%09red/K12873%09red/K12831%09red
ko00440	Phosphonate and phosphinate metabolism	OS02T0119800-01|OS06T0204400-01|OS06T0204400-02|OS02T0119800-02	4	11	2.79181e-05	0.00391828	http://www.genome.jp/kegg-bin/show_pathway?ko00440/K00993%09red
ko00510	N-Glycan biosynthesis	OS05T0301500-02|OS05T0301500-03|OS07T0661100-01|OS05T0301500-01	4	57	0.0047792	0.0296991	http://www.genome.jp/kegg-bin/show_pathway?ko00510/K01001%09red/K12666%09red
ko00020	Citrate cycle (TCA cycle)	OS06T0303400-00|OS03T0645100-01|OS03T0645100-03|OS03T0645100-02	4	85	0.0139382	0.0537129	http://www.genome.jp/kegg-bin/show_pathway?ko00020/K00162%09red/K01681%09red
ko03420	Nucleotide excision repair	OS09T0456900-01|OS01T0102800-01|OS01T0754100-01|OS10T0489200-01	4	90	0.0160222	0.0575342	http://www.genome.jp/kegg-bin/show_pathway?ko03420/K10747%09red/K10841%09red/K07466%09red
ko04070	Phosphatidylinositol signaling system	OS02T0523800-01|OS03T0711200-01|OS02T0787800-01|OS01T0777700-00	4	99	0.02003	0.0640914	http://www.genome.jp/kegg-bin/show_pathway?ko04070/K00915%09red/K13024%09red/K00901%09red/K00888%09red
ko04146	Peroxisome	OS12T0143900-01|OS08T0298700-01|OS08T0502700-03|OS08T0502700-01	4	122	0.0312672	0.079681	http://www.genome.jp/kegg-bin/show_pathway?ko04146/K01897%09red/K13356%09red/K00830%09red
ko00620	Pyruvate metabolism	OS01T0743500-01|OS03T0645100-01|OS03T0645100-03|OS03T0645100-02	4	137	0.0588953	0.0904771	http://www.genome.jp/kegg-bin/show_pathway?ko00620/K00029%09red/K00162%09red
ko00500	Starch and sucrose metabolism	OS07T0656200-01|OS04T0443300-00|OS03T0776000-01|OS10T0407000-01	4	285	0.0890873	0.0951039	http://www.genome.jp/kegg-bin/show_pathway?ko00500/K01179%09red/K01051%09red/K05350%09red/K01810%09red
ko00906	Carotenoid biosynthesis	OS04T0578400-01|OS11T0587000-01|OS11T0587000-02	3	39	0.00675202	0.0355607	http://www.genome.jp/kegg-bin/show_pathway?ko00906/K17911%09red/K15746%09red
ko04130	SNARE interactions in vesicular transport	OS02T0119400-01|OS01T0964000-01|OS01T0964000-02	3	46	0.00968829	0.0454542	http://www.genome.jp/kegg-bin/show_pathway?ko04130/K08503%09red/K08516%09red
ko00910	Nitrogen metabolism	OS04T0659100-03|OS04T0659100-02|OS04T0659100-01	3	47	0.010144	0.045793	http://www.genome.jp/kegg-bin/show_pathway?ko00910/K01915%09red
ko00061	Fatty acid biosynthesis	OS12T0143900-01|OS04T0643300-01|OS06T0143400-01	3	51	0.0120486	0.0500966	http://www.genome.jp/kegg-bin/show_pathway?ko00061/K01897%09red/K10781%09red/K00648%09red
ko03440	Homologous recombination	OS09T0456900-01|OS08T0177600-00|OS01T0754100-01	3	71	0.0230573	0.0700588	http://www.genome.jp/kegg-bin/show_pathway?ko03440/K10865%09red/K07466%09red
ko03030	DNA replication	OS09T0456900-01|OS01T0754100-01|OS10T0489200-01	3	74	0.0248505	0.0727108	http://www.genome.jp/kegg-bin/show_pathway?ko03030/K10747%09red/K07466%09red
ko01212	Fatty acid metabolism	OS12T0143900-01|OS04T0643300-01|OS06T0143400-01	3	98	0.0395121	0.0904771	http://www.genome.jp/kegg-bin/show_pathway?ko01212/K01897%09red/K10781%09red/K00648%09red
ko00220	Arginine biosynthesis	OS04T0659100-03|OS04T0659100-02|OS04T0659100-01	3	54	0.0515561	0.0535465	http://www.genome.jp/kegg-bin/show_pathway?ko00220/K01915%09red
ko03430	Mismatch repair	OS09T0456900-01|OS01T0754100-01|OS10T0489200-01	3	56	0.0515952	0.0749057	http://www.genome.jp/kegg-bin/show_pathway?ko03430/K10747%09red/K07466%09red
ko00051	Fructose and mannose metabolism	OS01T0118000-01|OS06T0311600-01|OS02T0766900-00	3	92	0.0518573	0.0871608	http://www.genome.jp/kegg-bin/show_pathway?ko00051/K01623%09red/K19355%09red
ko03018	RNA degradation	OS12T0403800-01|OS12T0403800-02|OS01T0118100-01	3	159	0.0706869	0.0948511	http://www.genome.jp/kegg-bin/show_pathway?ko03018/K14442%09red/K12589%09red
ko00230	Purine metabolism	OS06T0127900-01|OS03T0699300-01|OS12T0120400-01	3	199	0.0833877	0.0948511	http://www.genome.jp/kegg-bin/show_pathway?ko00230/K01939%09red/K10808%09red/K01522%09red
ko00909	Sesquiterpenoid and triterpenoid biosynthesis	OS11T0189600-01|OS11T0189600-02	2	11	0.00331937	0.023154	http://www.genome.jp/kegg-bin/show_pathway?ko00909/K19010%09red
ko00740	Riboflavin metabolism	OS02T0572400-01|OS02T0572400-02	2	13	0.00433926	0.0285668	http://www.genome.jp/kegg-bin/show_pathway?ko00740/K14652%09red
ko00945	Stilbenoid, diarylheptanoid and gingerol biosynthesis	OS12T0441600-00|OS11T0303600-01	2	34	0.019273	0.0640914	http://www.genome.jp/kegg-bin/show_pathway?ko00945/K16040%09red
ko00130	Ubiquinone and other terpenoid-quinone biosynthesis	OS06T0656500-02|OS06T0656500-01	2	50	0.0325497	0.0803571	http://www.genome.jp/kegg-bin/show_pathway?ko00130/K01904%09red
ko04626	Plant-pathogen interaction	OS10T0162854-01|OS08T0424700-00	2	217	0.0458644	0.0484991	http://www.genome.jp/kegg-bin/show_pathway?ko04626/K13457%09red
ko00360	Phenylalanine metabolism	OS06T0656500-02|OS06T0656500-01	2	73	0.050349	0.0923724	http://www.genome.jp/kegg-bin/show_pathway?ko00360/K01904%09red
ko00040	Pentose and glucuronate interconversions	OS10T0457200-00|OS10T0407000-01	2	74	0.0510544	0.0923724	http://www.genome.jp/kegg-bin/show_pathway?ko00040/K01051%09red/K01728%09red
ko03060	Protein export	OS12T0612625-00|OS01T0501700-01	2	74	0.0510544	0.0923724	http://www.genome.jp/kegg-bin/show_pathway?ko03060/K03118%09red/K10956%09red
ko03410	Base excision repair	OS06T0649800-01|OS10T0489200-01	2	55	0.0516331	0.0876975	http://www.genome.jp/kegg-bin/show_pathway?ko03410/K01246%09red/K10747%09red
ko00460	Cyanoamino acid metabolism	OS07T0656200-01|OS12T0409000-01	2	76	0.0524453	0.0923724	http://www.genome.jp/kegg-bin/show_pathway?ko00460/K00600%09red/K05350%09red
ko00562	Inositol phosphate metabolism	OS03T0711200-01|OS02T0523800-01	2	79	0.0544811	0.0923724	http://www.genome.jp/kegg-bin/show_pathway?ko00562/K00915%09red/K00888%09red
ko00030	Pentose phosphate pathway	OS01T0118000-01|OS03T0776000-01	2	85	0.0583676	0.0948511	http://www.genome.jp/kegg-bin/show_pathway?ko00030/K01623%09red/K01810%09red
ko00561	Glycerolipid metabolism	OS02T0802700-01|OS02T0787800-01	2	89	0.0608197	0.0948511	http://www.genome.jp/kegg-bin/show_pathway?ko00561/K00901%09red/K03715%09red
ko03008	Ribosome biogenesis in eukaryotes	OS03T0801800-01|OS03T0370500-02	2	119	0.0757765	0.0948511	http://www.genome.jp/kegg-bin/show_pathway?ko03008/K11131%09red/K14573%09red
ko04145	Phagosome	OS01T0227300-01|OS12T0612625-00	2	123	0.0773464	0.0948511	http://www.genome.jp/kegg-bin/show_pathway?ko04145/K10956%09red/K07897%09red
ko00270	Cysteine and methionine metabolism	OS06T0149900-01|OS06T0149700-00	2	148	0.0852776	0.0948511	http://www.genome.jp/kegg-bin/show_pathway?ko00270/K01738%09red
ko00190	Oxidative phosphorylation	OS10T0355800-00|OS05T0301700-01	2	164	0.0889313	0.0951039	http://www.genome.jp/kegg-bin/show_pathway?ko00190/K02112%09red/K00413%09red
ko04120	Ubiquitin mediated proteolysis	OS03T0427900-01|OS06T0311300-01	2	165	0.0891292	0.0951039	http://www.genome.jp/kegg-bin/show_pathway?ko04120/K04506%09red/K10597%09red
ko03015	mRNA surveillance pathway	OS03T0308900-01|OS05T0105900-01	2	172	0.0904251	0.0952477	http://www.genome.jp/kegg-bin/show_pathway?ko03015/K14405%09red/K14325%09red
ko03450	Non-homologous end-joining	OS08T0177600-00	1	14	0.0288269	0.0782879	http://www.genome.jp/kegg-bin/show_pathway?ko03450/K10865%09red
ko00591	Linoleic acid metabolism	OS03T0699700-01	1	27	0.0510048	0.0923724	http://www.genome.jp/kegg-bin/show_pathway?ko00591/K15718%09red
ko00073	Cutin, suberine and wax biosynthesis	OS08T0298700-01	1	28	0.0511939	0.0923724	http://www.genome.jp/kegg-bin/show_pathway?ko00073/K13356%09red
ko00563	Glycosylphosphatidylinositol(GPI)-anchor biosynthesis	OS05T0290300-00	1	29	0.0513564	0.0923724	http://www.genome.jp/kegg-bin/show_pathway?ko00563/K03860%09red
ko00670	One carbon pool by folate	OS12T0409000-01	1	31	0.0516039	0.0923724	http://www.genome.jp/kegg-bin/show_pathway?ko00670/K00600%09red
ko00600	Sphingolipid metabolism	OS02T0701900-01	1	43	0.0631457	0.0948511	http://www.genome.jp/kegg-bin/show_pathway?ko00600/K04708%09red
ko02010	ABC transporters	OS01T0534700-00	1	46	0.0655732	0.0948511	http://www.genome.jp/kegg-bin/show_pathway?ko02010/K05658%09red
ko00310	Lysine degradation	OS08T0400200-00	1	47	0.0663463	0.0948511	http://www.genome.jp/kegg-bin/show_pathway?ko00310/K11420%09red
ko03022	Basal transcription factors	OS03T0193600-00	1	55	0.0719394	0.0948511	http://www.genome.jp/kegg-bin/show_pathway?ko03022/K03124%09red
ko00860	Porphyrin and chlorophyll metabolism	OS07T0656500-00	1	58	0.0737887	0.0948511	http://www.genome.jp/kegg-bin/show_pathway?ko00860/K03403%09red
ko00410	beta-Alanine metabolism	OS03T0193400-00	1	64	0.0771304	0.0948511	http://www.genome.jp/kegg-bin/show_pathway?ko00410/K13366%09red
ko00071	Fatty acid degradation	OS12T0143900-01	1	69	0.079588	0.0948511	http://www.genome.jp/kegg-bin/show_pathway?ko00071/K01897%09red
ko00900	Terpenoid backbone biosynthesis	OS02T0197700-01	1	70	0.0800469	0.0948511	http://www.genome.jp/kegg-bin/show_pathway?ko00900/K11778%09red
ko01210	2-Oxocarboxylic acid metabolism	OS06T0303400-00	1	80	0.0841063	0.0948511	http://www.genome.jp/kegg-bin/show_pathway?ko01210/K01681%09red
ko00970	Aminoacyl-tRNA biosynthesis	OS08T0320000-01	1	87	0.0864466	0.0948511	http://www.genome.jp/kegg-bin/show_pathway?ko00970/K01866%09red
ko00330	Arginine and proline metabolism	OS03T0193400-00	1	87	0.0864466	0.0948511	http://www.genome.jp/kegg-bin/show_pathway?ko00330/K13366%09red
ko00240	Pyrimidine metabolism	OS06T0127900-01	1	152	0.09692	0.0984991	http://www.genome.jp/kegg-bin/show_pathway?ko00240/K10808%09red
ko00520	Amino sugar and nucleotide sugar metabolism	OS03T0776000-01	1	187	0.0986158	0.0986158	http://www.genome.jp/kegg-bin/show_pathway?ko00520/K01810%09red

## Sheet: RBSDV_GO
GO_accession	Description	GeneNames	Ontology	pValue	qValue	fg	bg
GO:0010155	regulation of proton transport	OS08T0390000-01,OS08T0390000-02,OS09T0346400-01,OS09T0346400-02	BP	5.4e-07	9.792e-05	4	4
GO:1904062	regulation of cation transmembrane transport	OS08T0390000-01,OS08T0390000-02,OS09T0346400-01,OS09T0346400-02	BP	5.4e-07	9.792e-05	4	4
GO:0032069	regulation of nuclease activity	OS03T0308800-01,OS03T0308800-02,OS03T0308800-03	BP	2e-05	0.000836923	3	3
GO:0032074	negative regulation of nuclease activity	OS03T0308800-01,OS03T0308800-02,OS03T0308800-03	BP	2e-05	0.000836923	3	3
GO:0060700	regulation of ribonuclease activity	OS03T0308800-01,OS03T0308800-02,OS03T0308800-03	BP	2e-05	0.000836923	3	3
GO:0060701	negative regulation of ribonuclease activity	OS03T0308800-01,OS03T0308800-02,OS03T0308800-03	BP	2e-05	0.000836923	3	3
GO:1901917	regulation of exoribonuclease activity	OS03T0308800-01,OS03T0308800-02,OS03T0308800-03	BP	2e-05	0.000836923	3	3
GO:1901918	negative regulation of exoribonuclease activity	OS03T0308800-01,OS03T0308800-02,OS03T0308800-03	BP	2e-05	0.000836923	3	3
GO:1905777	regulation of exonuclease activity	OS03T0308800-01,OS03T0308800-02,OS03T0308800-03	BP	2e-05	0.000836923	3	3
GO:1905778	negative regulation of exonuclease activity	OS03T0308800-01,OS03T0308800-02,OS03T0308800-03	BP	2e-05	0.000836923	3	3
GO:0035303	regulation of dephosphorylation	OS03T0308800-01,OS03T0308800-02,OS03T0308800-03,OS04T0234600-01,OS04T0234600-02,OS04T0234600-03,OS04T0414700-01,OS05T0213500-01,OS05T0301600-01,OS12T0137500-01	BP	8.2e-05	0.00202764	10	83
GO:0009768	photosynthesis, light harvesting in photosystem I	OS02T0197600-01,OS02T0197600-02,OS02T0197600-03,OS04T0414700-01,OS07T0558400-01	BP	0.00021	0.00476	5	21
GO:0035304	regulation of protein dephosphorylation	OS03T0308800-01,OS03T0308800-02,OS03T0308800-03,OS04T0234600-01,OS04T0234600-02,OS04T0234600-03,OS04T0414700-01,OS05T0213500-01,OS05T0301600-01	BP	0.00026	0.00544	9	78
GO:0009070	serine family amino acid biosynthetic process	OS02T0197600-01,OS02T0197600-02,OS02T0197600-03,OS04T0234600-01,OS04T0234600-02,OS04T0234600-03,OS04T0414700-01,OS06T0149700-00,OS06T0149900-01,OS08T0502700-01,OS08T0502700-03	BP	0.00034	0.00660571	11	117
GO:0007018	microtubule-based movement	OS01T0744000-01,OS01T0744000-02,OS04T0629700-01,OS04T0629700-02,OS04T0629700-03	BP	0.0004	0.00701935	5	24
GO:0009407	toxin catabolic process	OS10T0368100-01,OS10T0529400-01,OS10T0529500-01,OS10T0529700-01,OS10T0529800-00,OS10T0530200-01,OS10T0530400-01,OS10T0530600-01	BP	0.0004	0.00701935	8	66
GO:0009069	serine family amino acid metabolic process	OS02T0197600-01,OS02T0197600-02,OS02T0197600-03,OS04T0234600-01,OS04T0234600-02,OS04T0234600-03,OS04T0414700-01,OS06T0149700-00,OS06T0149900-01,OS08T0502700-01,OS08T0502700-03,OS12T0409000-01	BP	0.00041	0.00656	12	139
GO:0019748	secondary metabolic process	OS01T0227400-01,OS01T0227500-01,OS02T0469900-01,OS04T0171600-01,OS04T0171600-02,OS04T0171800-01,OS04T0234600-01,OS04T0234600-02,OS04T0234600-03,OS08T0507100-00,OS08T0507702-01,OS10T0206800-01,OS10T0206800-02,OS10T0368100-01,OS10T0529400-01,OS10T0529500-01,OS10T0529700-01,OS10T0529800-00,OS10T0530200-01,OS10T0530400-01,OS10T0530600-01	BP	0.00042	0.00634667	21	340
GO:0045898	regulation of RNA polymerase II transcriptional preinitiation complex assembly	OS02T0199900-01,OS02T0199900-02,OS02T0199900-03,OS06T0607800-01	BP	0.00058	0.00809026	4	15
GO:0045899	positive regulation of RNA polymerase II transcriptional preinitiation complex assembly	OS02T0199900-01,OS02T0199900-02,OS02T0199900-03,OS06T0607800-01	BP	0.00058	0.00809026	4	15
GO:0005986	sucrose biosynthetic process	OS04T0234600-01,OS04T0234600-02,OS04T0234600-03	BP	0.00064	0.00828952	3	7
GO:0009404	toxin metabolic process	OS10T0368100-01,OS10T0529400-01,OS10T0529500-01,OS10T0529700-01,OS10T0529800-00,OS10T0530200-01,OS10T0530400-01,OS10T0530600-01	BP	0.00066	0.00816	8	71
GO:0043269	regulation of ion transport	OS02T0437800-01,OS02T0437800-02,OS08T0390000-01,OS08T0390000-02,OS09T0346400-01,OS09T0346400-02	BP	0.00078	0.00922435	6	41
GO:0006075	(1->3)-beta-D-glucan biosynthetic process	OS01T0754200-01,OS01T0754200-02,OS01T0754200-03,OS01T0754200-04	BP	0.00096	0.01088	4	17
GO:0005985	sucrose metabolic process	OS04T0234600-01,OS04T0234600-02,OS04T0234600-03	BP	0.00101	0.0109888	3	8
GO:0051246	regulation of protein metabolic process	OS02T0124000-01,OS02T0199900-01,OS02T0199900-02,OS02T0199900-03,OS03T0308800-01,OS03T0308800-02,OS03T0308800-03,OS03T0645200-01,OS03T0856500-01,OS03T0856500-02,OS04T0234600-01,OS04T0234600-02,OS04T0234600-03,OS04T0414700-01,OS05T0213500-01,OS05T0301600-01,OS06T0607800-01,OS06T0682800-01,OS08T0523200-00,OS08T0523400-00,OS08T0523700-00,OS10T0569200-01,OS12T0103500-00	BP	0.00102	0.0106708	23	415
GO:0044272	sulfur compound biosynthetic process	OS02T0197600-01,OS02T0197600-02,OS02T0197600-03,OS03T0645100-01,OS03T0645100-02,OS03T0645100-03,OS04T0234600-01,OS04T0234600-02,OS04T0234600-03,OS04T0414700-01,OS06T0149700-00,OS06T0149900-01,OS10T0206800-01,OS10T0206800-02,OS12T0263050-00	BP	0.00118	0.0118874	15	223
GO:0006074	(1->3)-beta-D-glucan metabolic process	OS01T0754200-01,OS01T0754200-02,OS01T0754200-03,OS01T0754200-04	BP	0.00121	0.0117543	4	18
GO:0033554	cellular response to stress	OS02T0199900-01,OS02T0199900-02,OS02T0199900-03,OS02T0437800-01,OS02T0437800-02,OS02T0791800-01,OS02T0791800-02,OS03T0427900-01,OS03T0431550-01,OS03T0856200-01,OS03T0856200-03,OS03T0856200-04,OS03T0856400-01,OS03T0856400-02,OS04T0234600-01,OS04T0234600-02,OS04T0234600-03,OS04T0629500-01,OS04T0629500-02,OS06T0150100-01,OS06T0150400-01,OS06T0607800-01,OS06T0649800-01,OS08T0130000-00,OS08T0177600-00…	BP	0.00127	0.0119117	32	664
GO:0019344	cysteine biosynthetic process	OS02T0197600-01,OS02T0197600-02,OS02T0197600-03,OS04T0234600-01,OS04T0234600-02,OS04T0234600-03,OS04T0414700-01,OS06T0149700-00,OS06T0149900-01	BP	0.00128	0.0116053	9	97
GO:0050896	response to stimulus	OS01T0102800-01,OS01T0164600-01,OS01T0737800-01,OS01T0737800-02,OS01T0743800-00,OS01T0822200-01,OS01T0932700-00,OS01T0932950-00,OS01T0967200-01,OS01T0975800-00,OS02T0124000-01,OS02T0161800-01,OS02T0197600-01,OS02T0197600-02,OS02T0197600-03,OS02T0199900-01,OS02T0199900-02,OS02T0199900-03,OS02T0218400-01,OS02T0234300-01,OS02T0283800-01,OS02T0437800-01,OS02T0437800-02,OS02T0665800-01,OS02T0766700-01…	BP	0.00132	0.0115819	116	3301
GO:0006811	ion transport	OS01T0597400-00,OS01T0597600-01,OS01T0933200-00,OS02T0437800-01,OS02T0437800-02,OS02T0584700-01,OS02T0584800-01,OS02T0585100-00,OS02T0585200-01,OS02T0787600-01,OS02T0787600-02,OS02T0796700-01,OS03T0334700-01,OS04T0298200-01,OS04T0414700-01,OS04T0435100-01,OS04T0643600-01,OS05T0301700-01,OS06T0143700-01,OS06T0188000-01,OS06T0188100-01,OS06T0188600-01,OS07T0298900-01,OS08T0113800-01,OS08T0130000-00…	BP	0.00136	0.01156	35	751
GO:0070897	transcription preinitiation complex assembly	OS02T0199900-01,OS02T0199900-02,OS02T0199900-03,OS03T0193600-00,OS06T0607800-01	BP	0.00159	0.0129099	5	32
GO:0006534	cysteine metabolic process	OS02T0197600-01,OS02T0197600-02,OS02T0197600-03,OS04T0234600-01,OS04T0234600-02,OS04T0234600-03,OS04T0414700-01,OS06T0149700-00,OS06T0149900-01	BP	0.00159	0.0129099	9	100
GO:0006086	acetyl-CoA biosynthetic process from pyruvate	OS03T0645100-01,OS03T0645100-02,OS03T0645100-03	BP	0.00207	0.0160869	3	10
GO:0009765	photosynthesis, light harvesting	OS02T0197600-01,OS02T0197600-02,OS02T0197600-03,OS04T0414700-01,OS07T0558400-01	BP	0.0021	0.0158667	5	34
GO:0007215	glutamate receptor signaling pathway	OS02T0787600-01,OS02T0787600-02,OS06T0188600-01,OS09T0429500-00	BP	0.00223	0.0161749	4	21
GO:0035235	ionotropic glutamate receptor signaling pathway	OS02T0787600-01,OS02T0787600-02,OS06T0188600-01,OS09T0429500-00	BP	0.00223	0.0161749	4	21
GO:0009863	salicylic acid mediated signaling pathway	OS02T0796700-01,OS04T0234600-01,OS04T0234600-02,OS04T0234600-03,OS08T0130000-00,OS08T0335600-01	BP	0.00249	0.0173662	6	51
GO:0060260	regulation of transcription initiation from RNA polymerase II promoter	OS02T0199900-01,OS02T0199900-02,OS02T0199900-03,OS06T0607800-01	BP	0.00266	0.0176468	4	22
GO:0060261	positive regulation of transcription initiation from RNA polymerase II promoter	OS02T0199900-01,OS02T0199900-02,OS02T0199900-03,OS06T0607800-01	BP	0.00266	0.0176468	4	22
GO:2000144	positive regulation of DNA-templated transcription, initiation	OS02T0199900-01,OS02T0199900-02,OS02T0199900-03,OS06T0607800-01	BP	0.00266	0.0176468	4	22
GO:0032268	regulation of cellular protein metabolic process	OS02T0124000-01,OS02T0199900-01,OS02T0199900-02,OS02T0199900-03,OS03T0308800-01,OS03T0308800-02,OS03T0308800-03,OS03T0645200-01,OS03T0856500-01,OS03T0856500-02,OS04T0234600-01,OS04T0234600-02,OS04T0234600-03,OS04T0414700-01,OS05T0213500-01,OS05T0301600-01,OS06T0607800-01,OS06T0682800-01,OS10T0569200-01,OS12T0103500-00	BP	0.00267	0.0168893	20	368
GO:0010363	regulation of plant-type hypersensitive response	OS02T0437800-01,OS02T0437800-02,OS04T0234600-01,OS04T0234600-02,OS04T0234600-03,OS08T0335600-01	BP	0.00275	0.017	6	52
GO:0000726	non-recombinational repair	OS03T0856200-01,OS03T0856200-03,OS03T0856200-04	BP	0.00279	0.0166787	3	11
GO:0006303	double-strand break repair via nonhomologous end joining	OS03T0856200-01,OS03T0856200-03,OS03T0856200-04	BP	0.00279	0.0166787	3	11
GO:0051716	cellular response to stimulus	OS01T0164600-01,OS01T0737800-01,OS01T0737800-02,OS01T0743800-00,OS01T0822200-01,OS01T0932950-00,OS01T0967200-01,OS01T0975800-00,OS02T0161800-01,OS02T0199900-01,OS02T0199900-02,OS02T0199900-03,OS02T0283800-01,OS02T0437800-01,OS02T0437800-02,OS02T0766700-01,OS02T0787600-01,OS02T0787600-02,OS02T0787800-01,OS02T0791800-01,OS02T0791800-02,OS02T0796700-01,OS03T0226300-01,OS03T0427900-01,OS03T0431550-01…	BP	0.00285	0.0164936	75	2019
GO:0006414	translational elongation	OS02T0519900-01,OS02T0519900-02,OS02T0519900-03,OS02T0519900-04,OS02T0519900-05,OS03T0856500-01,OS03T0856500-02	BP	0.00286	0.0162067	7	70
GO:0071446	cellular response to salicylic acid stimulus	OS02T0796700-01,OS04T0234600-01,OS04T0234600-02,OS04T0234600-03,OS08T0130000-00,OS08T0335600-01	BP	0.00303	0.0168196	6	53
GO:0051123	RNA polymerase II preinitiation complex assembly	OS02T0199900-01,OS02T0199900-02,OS02T0199900-03,OS06T0607800-01	BP	0.00316	0.0171904	4	23
GO:0043067	regulation of programmed cell death	OS02T0437800-01,OS02T0437800-02,OS04T0234600-01,OS04T0234600-02,OS04T0234600-03,OS08T0335600-01	BP	0.00333	0.01776	6	54
GO:0019220	regulation of phosphate metabolic process	OS03T0308800-01,OS03T0308800-02,OS03T0308800-03,OS04T0234600-01,OS04T0234600-02,OS04T0234600-03,OS04T0414700-01,OS05T0213500-01,OS05T0301600-01,OS12T0137500-01	BP	0.00342	0.0177189	10	133
GO:0051174	regulation of phosphorus metabolic process	OS03T0308800-01,OS03T0308800-02,OS03T0308800-03,OS04T0234600-01,OS04T0234600-02,OS04T0234600-03,OS04T0414700-01,OS05T0213500-01,OS05T0301600-01,OS12T0137500-01	BP	0.00342	0.0177189	10	133
GO:0009645	response to low light intensity stimulus	OS02T0197600-01,OS02T0197600-02,OS02T0197600-03	BP	0.00365	0.0183852	3	12
GO:0000097	sulfur amino acid biosynthetic process	OS02T0197600-01,OS02T0197600-02,OS02T0197600-03,OS04T0234600-01,OS04T0234600-02,OS04T0234600-03,OS04T0414700-01,OS06T0149700-00,OS06T0149900-01	BP	0.00367	0.0181498	9	113
GO:2000142	regulation of DNA-templated transcription, initiation	OS02T0199900-01,OS02T0199900-02,OS02T0199900-03,OS06T0607800-01	BP	0.00371	0.01802	4	24
GO:0018107	peptidyl-threonine phosphorylation	OS03T0711300-01,OS03T0711300-02	BP	0.00426	0.0201517	2	4
GO:0018210	peptidyl-threonine modification	OS03T0711300-01,OS03T0711300-02	BP	0.00426	0.0201517	2	4
GO:0019725	cellular homeostasis	OS01T0933200-00,OS02T0437800-01,OS02T0437800-02,OS02T0584700-01,OS02T0584800-01,OS02T0585100-00,OS02T0585200-01,OS04T0414700-01,OS04T0629500-01,OS04T0629500-02,OS07T0260300-01,OS07T0298900-01,OS07T0684100-01,OS08T0502700-01,OS08T0502700-03,OS09T0286400-01,OS10T0482900-01	BP	0.0045	0.0207458	17	307
GO:1901990	regulation of mitotic cell cycle phase transition	OS02T0741500-01,OS03T0197400-01,OS03T0197400-02,OS05T0489800-01,OS10T0126700-01,OS10T0126800-01,OS10T0127000-01	BP	0.00454	0.0205813	7	76
GO:0080135	regulation of cellular response to stress	OS02T0437800-01,OS02T0437800-02,OS04T0234600-01,OS04T0234600-02,OS04T0234600-03,OS06T0150100-01,OS08T0335600-01	BP	0.00488	0.0215831	7	77
GO:1901987	regulation of cell cycle phase transition	OS02T0741500-01,OS03T0197400-01,OS03T0197400-02,OS05T0489800-01,OS10T0126700-01,OS10T0126800-01,OS10T0127000-01	BP	0.00488	0.0215831	7	77
GO:0018298	protein-chromophore linkage	OS02T0197600-01,OS02T0197600-02,OS02T0197600-03,OS07T0558400-01	BP	0.005	0.0215873	4	26
GO:0006812	cation transport	OS01T0933200-00,OS02T0584700-01,OS02T0584800-01,OS02T0585100-00,OS02T0585200-01,OS02T0796700-01,OS04T0298200-01,OS04T0414700-01,OS04T0643600-01,OS05T0301700-01,OS06T0188000-01,OS07T0298900-01,OS08T0130000-00,OS08T0390000-01,OS08T0390000-02,OS08T0502700-01,OS08T0502700-03,OS09T0286400-01,OS09T0346400-01,OS09T0346400-02,OS10T0355800-00,OS12T0136900-00	BP	0.00537	0.0228225	22	446
GO:0006417	regulation of translation	OS03T0308800-01,OS03T0308800-02,OS03T0308800-03,OS03T0645200-01,OS03T0856500-01,OS03T0856500-02,OS06T0682800-01,OS10T0569200-01,OS12T0103500-00	BP	0.00545	0.0228062	9	120
GO:0010941	regulation of cell death	OS02T0437800-01,OS02T0437800-02,OS04T0234600-01,OS04T0234600-02,OS04T0234600-03,OS08T0335600-01	BP	0.00563	0.0232024	6	60
GO:0006085	acetyl-CoA biosynthetic process	OS03T0645100-01,OS03T0645100-02,OS03T0645100-03	BP	0.0058	0.0230307	3	14
GO:0030042	actin filament depolymerization	OS04T0604000-01,OS04T0604000-02,OS07T0297500-00	BP	0.0058	0.0230307	3	14
GO:0035384	thioester biosynthetic process	OS03T0645100-01,OS03T0645100-02,OS03T0645100-03	BP	0.0058	0.0230307	3	14
GO:0071616	acyl-CoA biosynthetic process	OS03T0645100-01,OS03T0645100-02,OS03T0645100-03	BP	0.0058	0.0230307	3	14
GO:0006928	movement of cell or subcellular component	OS01T0744000-01,OS01T0744000-02,OS04T0629700-01,OS04T0629700-02,OS04T0629700-03	BP	0.00595	0.022635	5	43
GO:0017148	negative regulation of translation	OS03T0645200-01,OS03T0856500-01,OS03T0856500-02,OS06T0682800-01,OS12T0103500-00	BP	0.00595	0.022635	5	43
GO:0044772	mitotic cell cycle phase transition	OS02T0741500-01,OS03T0197400-01,OS03T0197400-02,OS05T0489800-01,OS10T0126700-01,OS10T0126800-01,OS10T0127000-01	BP	0.00601	0.0222411	7	80
GO:0071407	cellular response to organic cyclic compound	OS02T0796700-01,OS04T0234600-01,OS04T0234600-02,OS04T0234600-03,OS06T0127800-01,OS08T0130000-00,OS08T0335600-01	BP	0.00601	0.0222411	7	80
GO:0071236	cellular response to antibiotic	OS02T0796700-01,OS04T0234600-01,OS04T0234600-02,OS04T0234600-03,OS08T0130000-00,OS08T0335600-01	BP	0.00611	0.0221589	6	61
GO:0044770	cell cycle phase transition	OS02T0741500-01,OS03T0197400-01,OS03T0197400-02,OS05T0489800-01,OS10T0126700-01,OS10T0126800-01,OS10T0127000-01	BP	0.00643	0.0230126	7	81
GO:0006790	sulfur compound metabolic process	OS02T0197600-01,OS02T0197600-02,OS02T0197600-03,OS02T0469900-01,OS03T0645100-01,OS03T0645100-02,OS03T0645100-03,OS04T0234600-01,OS04T0234600-02,OS04T0234600-03,OS04T0414700-01,OS04T0643300-01,OS06T0149700-00,OS06T0149900-01,OS10T0206800-01,OS10T0206800-02,OS12T0263050-00	BP	0.00654	0.0231023	17	319
GO:0034762	regulation of transmembrane transport	OS08T0390000-01,OS08T0390000-02,OS09T0346400-01,OS09T0346400-02	BP	0.00656	0.0227302	4	28
GO:0034765	regulation of ion transmembrane transport	OS08T0390000-01,OS08T0390000-02,OS09T0346400-01,OS09T0346400-02	BP	0.00656	0.0227302	4	28
GO:0030003	cellular cation homeostasis	OS01T0933200-00,OS02T0437800-01,OS02T0437800-02,OS02T0584700-01,OS02T0584800-01,OS02T0585100-00,OS02T0585200-01,OS04T0414700-01,OS07T0298900-01,OS08T0502700-01,OS08T0502700-03,OS09T0286400-01	BP	0.00659	0.022406	12	193
GO:0006545	glycine biosynthetic process	OS08T0502700-01,OS08T0502700-03	BP	0.00697	0.0227047	2	5
GO:0010152	pollen maturation	OS06T0607700-01,OS06T0607900-01	BP	0.00697	0.0227047	2	5
GO:0010275	NAD(P)H dehydrogenase complex assembly	OS08T0167500-01,OS08T0167500-02	BP	0.00697	0.0227047	2	5
GO:0010971	positive regulation of G2/M transition of mitotic cell cycle	OS03T0197400-01,OS03T0197400-02	BP	0.00697	0.0227047	2	5
GO:0033566	gamma-tubulin complex localization	OS11T0362633-00,OS11T0368172-01	BP	0.00697	0.0227047	2	5
GO:1902751	positive regulation of cell cycle G2/M phase transition	OS03T0197400-01,OS03T0197400-02	BP	0.00697	0.0227047	2	5
GO:0034248	regulation of cellular amide metabolic process	OS03T0308800-01,OS03T0308800-02,OS03T0308800-03,OS03T0645200-01,OS03T0856500-01,OS03T0856500-02,OS06T0682800-01,OS10T0569200-01,OS12T0103500-00	BP	0.00709	0.0221664	9	125
GO:0009312	oligosaccharide biosynthetic process	OS03T0431550-01,OS03T0856300-01,OS04T0234600-01,OS04T0234600-02,OS04T0234600-03	BP	0.00723	0.0223473	5	45
GO:0019684	photosynthesis, light reaction	OS01T0501800-01,OS02T0197600-01,OS02T0197600-02,OS02T0197600-03,OS04T0414700-01,OS05T0508900-01,OS07T0558400-01	BP	0.00782	0.0238993	7	84
GO:0030433	ubiquitin-dependent ERAD pathway	OS02T0199900-01,OS02T0199900-02,OS02T0199900-03,OS03T0427900-01,OS06T0607800-01	BP	0.00793	0.0239662	5	46
GO:0035690	cellular response to drug	OS02T0796700-01,OS04T0234600-01,OS04T0234600-02,OS04T0234600-03,OS08T0130000-00,OS08T0335600-01	BP	0.0083	0.0248088	6	65
GO:0051261	protein depolymerization	OS04T0604000-01,OS04T0604000-02,OS07T0297500-00	BP	0.00856	0.0253078	3	16
GO:0006873	cellular ion homeostasis	OS01T0933200-00,OS02T0437800-01,OS02T0437800-02,OS02T0584700-01,OS02T0584800-01,OS02T0585100-00,OS02T0585200-01,OS04T0414700-01,OS07T0298900-01,OS08T0502700-01,OS08T0502700-03,OS09T0286400-01	BP	0.00865	0.0252989	12	200
GO:0034249	negative regulation of cellular amide metabolic process	OS03T0645200-01,OS03T0856500-01,OS03T0856500-02,OS06T0682800-01,OS12T0103500-00	BP	0.00868	0.0249837	5	47
GO:0036503	ERAD pathway	OS02T0199900-01,OS02T0199900-02,OS02T0199900-03,OS03T0427900-01,OS06T0607800-01	BP	0.00868	0.0249837	5	47
GO:0010243	response to organonitrogen compound	OS02T0199900-01,OS02T0199900-02,OS02T0199900-03,OS03T0427900-01,OS04T0234600-01,OS04T0234600-02,OS04T0234600-03,OS06T0607800-01	BP	0.00873	0.0246068	8	107
GO:0046916	cellular transition metal ion homeostasis	OS01T0933200-00,OS02T0437800-01,OS02T0437800-02,OS02T0584700-01,OS02T0584800-01,OS02T0585100-00,OS02T0585200-01,OS07T0298900-01	BP	0.00873	0.0246068	8	107
GO:0009862	systemic acquired resistance, salicylic acid mediated signaling pathway	OS04T0234600-01,OS04T0234600-02,OS04T0234600-03,OS08T0335600-01	BP	0.00945	0.0262286	4	31
GO:0048519	negative regulation of biological process	OS01T0737800-01,OS01T0737800-02,OS02T0124000-01,OS02T0437800-01,OS02T0437800-02,OS02T0741500-01,OS03T0308800-01,OS03T0308800-02,OS03T0308800-03,OS03T0645200-01,OS03T0856500-01,OS03T0856500-02,OS04T0234600-01,OS04T0234600-02,OS04T0234600-03,OS04T0546300-01,OS04T0604000-01,OS04T0604000-02,OS05T0489800-01,OS06T0682800-01,OS08T0130000-00,OS08T0335600-01,OS10T0126700-01,OS10T0126800-01,OS10T0127000-01…	BP	0.0096	0.0263758	30	701
GO:0048523	negative regulation of cellular process	OS01T0737800-01,OS01T0737800-02,OS02T0124000-01,OS02T0437800-01,OS02T0437800-02,OS02T0741500-01,OS03T0308800-01,OS03T0308800-02,OS03T0308800-03,OS03T0645200-01,OS03T0856500-01,OS03T0856500-02,OS04T0604000-01,OS04T0604000-02,OS05T0489800-01,OS06T0682800-01,OS10T0126700-01,OS10T0126800-01,OS10T0127000-01,OS12T0103500-00,OS12T0263100-01	BP	0.00989	0.0269008	21	443
GO:0042549	photosystem II stabilization	OS01T0501800-01,OS05T0508900-01	BP	0.01027	0.0275216	2	6
GO:0051014	actin filament severing	OS04T0604000-01,OS04T0604000-02	BP	0.01027	0.0275216	2	6
GO:0016143	S-glycoside metabolic process	OS02T0469900-01,OS04T0234600-01,OS04T0234600-02,OS04T0234600-03,OS10T0206800-01,OS10T0206800-02	BP	0.01028	0.0268862	6	68
GO:0019757	glycosinolate metabolic process	OS02T0469900-01,OS04T0234600-01,OS04T0234600-02,OS04T0234600-03,OS10T0206800-01,OS10T0206800-02	BP	0.01028	0.0268862	6	68
GO:0019760	glucosinolate metabolic process	OS02T0469900-01,OS04T0234600-01,OS04T0234600-02,OS04T0234600-03,OS10T0206800-01,OS10T0206800-02	BP	0.01028	0.0268862	6	68
GO:0046351	disaccharide biosynthetic process	OS03T0431550-01,OS04T0234600-01,OS04T0234600-02,OS04T0234600-03	BP	0.01058	0.0271487	4	32
GO:0009626	plant-type hypersensitive response	OS02T0437800-01,OS02T0437800-02,OS04T0234600-01,OS04T0234600-02,OS04T0234600-03,OS08T0335600-01	BP	0.01178	0.0296681	6	70
GO:0034050	host programmed cell death induced by symbiont	OS02T0437800-01,OS02T0437800-02,OS04T0234600-01,OS04T0234600-02,OS04T0234600-03,OS08T0335600-01	BP	0.01178	0.0296681	6	70
GO:0051274	beta-glucan biosynthetic process	OS01T0754200-01,OS01T0754200-02,OS01T0754200-03,OS01T0754200-04	BP	0.01178	0.0296681	4	33
GO:0048585	negative regulation of response to stimulus	OS01T0737800-01,OS01T0737800-02,OS04T0234600-01,OS04T0234600-02,OS04T0234600-03,OS08T0130000-00,OS08T0335600-01	BP	0.0119	0.0294255	7	91
GO:0030001	metal ion transport	OS01T0933200-00,OS02T0584700-01,OS02T0584800-01,OS02T0585100-00,OS02T0585200-01,OS02T0796700-01,OS04T0414700-01,OS04T0643600-01,OS06T0188000-01,OS07T0298900-01,OS08T0130000-00,OS08T0502700-01,OS08T0502700-03,OS09T0286400-01,OS12T0136900-00	BP	0.01212	0.0296995	15	287
GO:0006302	double-strand break repair	OS03T0856200-01,OS03T0856200-03,OS03T0856200-04,OS08T0177600-00,OS09T0121050-00,OS10T0161700-01	BP	0.01258	0.0305514	6	71
GO:0000096	sulfur amino acid metabolic process	OS02T0197600-01,OS02T0197600-02,OS02T0197600-03,OS04T0234600-01,OS04T0234600-02,OS04T0234600-03,OS04T0414700-01,OS06T0149700-00,OS06T0149900-01	BP	0.01309	0.0315087	9	138
GO:0016144	S-glycoside biosynthetic process	OS04T0234600-01,OS04T0234600-02,OS04T0234600-03,OS10T0206800-01,OS10T0206800-02	BP	0.01318	0.0310386	5	52
GO:0019758	glycosinolate biosynthetic process	OS04T0234600-01,OS04T0234600-02,OS04T0234600-03,OS10T0206800-01,OS10T0206800-02	BP	0.01318	0.0310386	5	52
GO:0019761	glucosinolate biosynthetic process	OS04T0234600-01,OS04T0234600-02,OS04T0234600-03,OS10T0206800-01,OS10T0206800-02	BP	0.01318	0.0310386	5	52
GO:0031348	negative regulation of defense response	OS04T0234600-01,OS04T0234600-02,OS04T0234600-03,OS08T0130000-00,OS08T0335600-01	BP	0.01318	0.0310386	5	52
GO:0044550	secondary metabolite biosynthetic process	OS01T0227400-01,OS01T0227500-01,OS04T0171600-01,OS04T0171600-02,OS04T0171800-01,OS04T0234600-01,OS04T0234600-02,OS04T0234600-03,OS08T0507100-00,OS08T0507702-01,OS10T0206800-01,OS10T0206800-02	BP	0.01331	0.0305512	12	212
GO:0055082	cellular chemical homeostasis	OS01T0933200-00,OS02T0437800-01,OS02T0437800-02,OS02T0584700-01,OS02T0584800-01,OS02T0585100-00,OS02T0585200-01,OS04T0414700-01,OS07T0298900-01,OS08T0502700-01,OS08T0502700-03,OS09T0286400-01	BP	0.01331	0.0305512	12	212
GO:0034473	U1 snRNA 3'-end processing	OS12T0403800-01,OS12T0403800-02	BP	0.01412	0.0314807	2	7
GO:0034476	U5 snRNA 3'-end processing	OS12T0403800-01,OS12T0403800-02	BP	0.01412	0.0314807	2	7
GO:0042136	neurotransmitter biosynthetic process	OS08T0502700-01,OS08T0502700-03	BP	0.01412	0.0314807	2	7
GO:0071042	nuclear polyadenylation-dependent mRNA catabolic process	OS12T0403800-01,OS12T0403800-02	BP	0.01412	0.0314807	2	7
GO:0071047	polyadenylation-dependent mRNA catabolic process	OS12T0403800-01,OS12T0403800-02	BP	0.01412	0.0314807	2	7
GO:0009751	response to salicylic acid	OS02T0796700-01,OS04T0234600-01,OS04T0234600-02,OS04T0234600-03,OS08T0130000-00,OS08T0335600-01	BP	0.01429	0.031095	6	73
GO:0006644	phospholipid metabolic process	OS02T0119800-01,OS02T0119800-02,OS03T0711200-01,OS03T0856300-01,OS05T0290300-00,OS06T0204400-01,OS06T0204400-02,OS07T0260400-01,OS07T0558200-01,OS07T0558200-02,OS07T0558300-01,OS07T0661100-01,OS08T0129900-00	BP	0.01435	0.0309778	13	240
GO:0006875	cellular metal ion homeostasis	OS01T0933200-00,OS02T0437800-01,OS02T0437800-02,OS02T0584700-01,OS02T0584800-01,OS02T0585100-00,OS02T0585200-01,OS07T0298900-01	BP	0.01518	0.032384	8	118
GO:1901698	response to nitrogen compound	OS02T0199900-01,OS02T0199900-02,OS02T0199900-03,OS03T0427900-01,OS04T0234600-01,OS04T0234600-02,OS04T0234600-03,OS06T0607800-01	BP	0.01518	0.032384	8	118
GO:0090150	establishment of protein localization to membrane	OS01T0164700-01,OS02T0437800-01,OS02T0437800-02,OS04T0234600-01,OS04T0234600-02,OS04T0234600-03,OS08T0335600-01	BP	0.01563	0.0329563	7	96
GO:0048447	sepal morphogenesis	OS05T0489800-01,OS06T0127800-01,OS12T0263100-01	BP	0.01609	0.0334082	3	20
GO:0048451	petal formation	OS05T0489800-01,OS06T0127800-01,OS12T0263100-01	BP	0.01609	0.0334082	3	20
GO:0048453	sepal formation	OS05T0489800-01,OS06T0127800-01,OS12T0263100-01	BP	0.01609	0.0334082	3	20
GO:0055076	transition metal ion homeostasis	OS01T0933200-00,OS02T0437800-01,OS02T0437800-02,OS02T0584700-01,OS02T0584800-01,OS02T0585100-00,OS02T0585200-01,OS07T0298900-01	BP	0.01665	0.0340511	8	120
GO:1901566	organonitrogen compound biosynthetic process	OS01T0118000-01,OS01T0205500-01,OS01T0877400-01,OS02T0197600-01,OS02T0197600-02,OS02T0197600-03,OS02T0519900-01,OS02T0519900-02,OS02T0519900-03,OS02T0519900-04,OS02T0519900-05,OS02T0791800-01,OS02T0791800-02,OS02T0803200-01,OS02T0821200-01,OS03T0193600-00,OS03T0308800-01,OS03T0308800-02,OS03T0308800-03,OS03T0645100-01,OS03T0645100-02,OS03T0645100-03,OS03T0645200-01,OS03T0755700-00,OS03T0776000-01…	BP	0.01681	0.0341218	58	1616
GO:0006084	acetyl-CoA metabolic process	OS03T0645100-01,OS03T0645100-02,OS03T0645100-03,OS04T0643300-01	BP	0.01748	0.035219	4	37
GO:0031331	positive regulation of cellular catabolic process	OS02T0199900-01,OS02T0199900-02,OS02T0199900-03,OS06T0607800-01,OS06T0682800-01	BP	0.01775	0.0355	5	56
GO:0045088	regulation of innate immune response	OS02T0437800-01,OS02T0437800-02,OS04T0234600-01,OS04T0234600-02,OS04T0234600-03,OS08T0335600-01	BP	0.0182	0.0360029	6	77
GO:0050776	regulation of immune response	OS02T0437800-01,OS02T0437800-02,OS04T0234600-01,OS04T0234600-02,OS04T0234600-03,OS08T0335600-01	BP	0.0182	0.0360029	6	77
GO:0009595	detection of biotic stimulus	OS04T0234600-01,OS04T0234600-02,OS04T0234600-03	BP	0.0184	0.035495	3	21
GO:0033866	nucleoside bisphosphate biosynthetic process	OS03T0645100-01,OS03T0645100-02,OS03T0645100-03	BP	0.0184	0.035495	3	21
GO:0034030	ribonucleoside bisphosphate biosynthetic process	OS03T0645100-01,OS03T0645100-02,OS03T0645100-03	BP	0.0184	0.035495	3	21
GO:0034033	purine nucleoside bisphosphate biosynthetic process	OS03T0645100-01,OS03T0645100-02,OS03T0645100-03	BP	0.0184	0.035495	3	21
GO:0048446	petal morphogenesis	OS05T0489800-01,OS06T0127800-01,OS12T0263100-01	BP	0.0184	0.035495	3	21
GO:0018342	protein prenylation	OS01T0737800-01,OS01T0737800-02	BP	0.01849	0.0348047	2	8
GO:0097354	prenylation	OS01T0737800-01,OS01T0737800-02	BP	0.01849	0.0348047	2	8
GO:0009896	positive regulation of catabolic process	OS02T0199900-01,OS02T0199900-02,OS02T0199900-03,OS06T0607800-01,OS06T0682800-01	BP	0.01903	0.0354532	5	57
GO:0072657	protein localization to membrane	OS01T0164700-01,OS02T0437800-01,OS02T0437800-02,OS04T0234600-01,OS04T0234600-02,OS04T0234600-03,OS08T0335600-01	BP	0.01917	0.035471	7	100
GO:0071229	cellular response to acid chemical	OS01T0737800-01,OS01T0737800-02,OS02T0766700-01,OS02T0796700-01,OS04T0234600-01,OS04T0234600-02,OS04T0234600-03,OS07T0558100-00,OS08T0130000-00,OS08T0335600-01	BP	0.01924	0.03536	10	172
GO:0006612	protein targeting to membrane	OS02T0437800-01,OS02T0437800-02,OS04T0234600-01,OS04T0234600-02,OS04T0234600-03,OS08T0335600-01	BP	0.01928	0.0351957	6	78
GO:1901800	positive regulation of proteasomal protein catabolic process	OS02T0199900-01,OS02T0199900-02,OS02T0199900-03,OS06T0607800-01	BP	0.02087	0.0375936	4	39
GO:1903052	positive regulation of proteolysis involved in cellular protein catabolic process	OS02T0199900-01,OS02T0199900-02,OS02T0199900-03,OS06T0607800-01	BP	0.02087	0.0375936	4	39
GO:1903364	positive regulation of cellular protein catabolic process	OS02T0199900-01,OS02T0199900-02,OS02T0199900-03,OS06T0607800-01	BP	0.02087	0.0375936	4	39
GO:0006544	glycine metabolic process	OS08T0502700-01,OS08T0502700-03,OS12T0409000-01	BP	0.02089	0.0367772	3	22
GO:0016073	snRNA metabolic process	OS03T0370500-02,OS12T0403800-01,OS12T0403800-02	BP	0.02089	0.0367772	3	22
GO:0048442	sepal development	OS05T0489800-01,OS06T0127800-01,OS12T0263100-01	BP	0.02089	0.0367772	3	22
GO:0048464	flower calyx development	OS05T0489800-01,OS06T0127800-01,OS12T0263100-01	BP	0.02089	0.0367772	3	22
GO:0002682	regulation of immune system process	OS02T0437800-01,OS02T0437800-02,OS04T0234600-01,OS04T0234600-02,OS04T0234600-03,OS08T0335600-01	BP	0.02157	0.0373697	6	80
GO:0055080	cation homeostasis	OS01T0933200-00,OS02T0437800-01,OS02T0437800-02,OS02T0584700-01,OS02T0584800-01,OS02T0585100-00,OS02T0585200-01,OS04T0414700-01,OS07T0298900-01,OS08T0502700-01,OS08T0502700-03,OS09T0286400-01	BP	0.02158	0.0371504	12	227
GO:0000165	MAPK cascade	OS01T0975800-00,OS04T0234600-01,OS04T0234600-02,OS04T0234600-03,OS06T0108500-01	BP	0.02179	0.037276	5	59
GO:0009987	cellular process	OS01T0117500-00,OS01T0117600-01,OS01T0117700-00,OS01T0118000-01,OS01T0164500-01,OS01T0164600-01,OS01T0164700-01,OS01T0191200-01,OS01T0191200-02,OS01T0191300-01,OS01T0191300-02,OS01T0191300-03,OS01T0205300-00,OS01T0205500-01,OS01T0364400-00,OS01T0501800-01,OS01T0534800-01,OS01T0534800-02,OS01T0725800-01,OS01T0737800-01,OS01T0737800-02,OS01T0737900-01,OS01T0743500-01,OS01T0743800-00,OS01T0744000-01…	BP	0.02268	0.038556	346	12042
GO:0045732	positive regulation of protein catabolic process	OS02T0199900-01,OS02T0199900-02,OS02T0199900-03,OS06T0607800-01	BP	0.0227	0.0378798	4	40
GO:0045862	positive regulation of proteolysis	OS02T0199900-01,OS02T0199900-02,OS02T0199900-03,OS06T0607800-01	BP	0.0227	0.0378798	4	40
GO:0061136	regulation of proteasomal protein catabolic process	OS02T0199900-01,OS02T0199900-02,OS02T0199900-03,OS06T0607800-01	BP	0.0227	0.0378798	4	40
GO:1903050	regulation of proteolysis involved in cellular protein catabolic process	OS02T0199900-01,OS02T0199900-02,OS02T0199900-03,OS06T0607800-01	BP	0.0227	0.0378798	4	40
GO:1903362	regulation of cellular protein catabolic process	OS02T0199900-01,OS02T0199900-02,OS02T0199900-03,OS06T0607800-01	BP	0.0227	0.0378798	4	40
GO:0012501	programmed cell death	OS02T0437800-01,OS02T0437800-02,OS04T0234600-01,OS04T0234600-02,OS04T0234600-03,OS08T0335600-01	BP	0.02279	0.0373427	6	81
GO:0009934	regulation of meristem structural organization	OS01T0737800-01,OS01T0737800-02	BP	0.02335	0.0380311	2	9
GO:0043603	cellular amide metabolic process	OS01T0205500-01,OS02T0218200-01,OS02T0218200-02,OS02T0519900-01,OS02T0519900-02,OS02T0519900-03,OS02T0519900-04,OS02T0519900-05,OS02T0803200-01,OS02T0821200-01,OS03T0193600-00,OS03T0308800-01,OS03T0308800-02,OS03T0308800-03,OS03T0645100-01,OS03T0645100-02,OS03T0645100-03,OS03T0645200-01,OS03T0755700-00,OS03T0856500-01,OS03T0856500-02,OS04T0423700-01,OS04T0627900-01,OS04T0643300-01,OS06T0682800-01…	BP	0.02356	0.0381448	35	908
GO:0065004	protein-DNA complex assembly	OS02T0199900-01,OS02T0199900-02,OS02T0199900-03,OS03T0193600-00,OS05T0489800-01,OS06T0607800-01	BP	0.02404	0.0386916	6	82
GO:0008219	cell death	OS02T0437800-01,OS02T0437800-02,OS02T0796700-01,OS04T0234600-01,OS04T0234600-02,OS04T0234600-03,OS08T0335600-01	BP	0.02432	0.038912	7	105
GO:0009697	salicylic acid biosynthetic process	OS04T0234600-01,OS04T0234600-02,OS04T0234600-03,OS08T0130000-00	BP	0.02463	0.0389498	4	41
GO:1901988	negative regulation of cell cycle phase transition	OS02T0741500-01,OS10T0126700-01,OS10T0126800-01,OS10T0127000-01	BP	0.02463	0.0389498	4	41
GO:1901991	negative regulation of mitotic cell cycle phase transition	OS02T0741500-01,OS10T0126700-01,OS10T0126800-01,OS10T0127000-01	BP	0.02463	0.0389498	4	41
GO:0001505	regulation of neurotransmitter levels	OS08T0502700-01,OS08T0502700-03,OS12T0409000-01	BP	0.02638	0.0407691	3	24
GO:0042133	neurotransmitter metabolic process	OS08T0502700-01,OS08T0502700-03,OS12T0409000-01	BP	0.02638	0.0407691	3	24
GO:0043628	ncRNA 3'-end processing	OS03T0370500-02,OS12T0403800-01,OS12T0403800-02	BP	0.02638	0.0407691	3	24
GO:0048441	petal development	OS05T0489800-01,OS06T0127800-01,OS12T0263100-01	BP	0.02638	0.0407691	3	24
GO:0048465	corolla development	OS05T0489800-01,OS06T0127800-01,OS12T0263100-01	BP	0.02638	0.0407691	3	24
GO:0042592	homeostatic process	OS01T0933200-00,OS02T0437800-01,OS02T0437800-02,OS02T0584700-01,OS02T0584800-01,OS02T0585100-00,OS02T0585200-01,OS03T0856200-01,OS03T0856200-03,OS03T0856200-04,OS04T0414700-01,OS04T0629500-01,OS04T0629500-02,OS07T0260300-01,OS07T0298900-01,OS07T0684100-01,OS08T0502700-01,OS08T0502700-03,OS09T0286400-01,OS10T0482900-01	BP	0.02675	0.040648	20	460
GO:0065008	regulation of biological quality	OS01T0933200-00,OS02T0437800-01,OS02T0437800-02,OS02T0584700-01,OS02T0584800-01,OS02T0585100-00,OS02T0585200-01,OS03T0334700-01,OS03T0856200-01,OS03T0856200-03,OS03T0856200-04,OS04T0234600-01,OS04T0234600-02,OS04T0234600-03,OS04T0414700-01,OS04T0604000-01,OS04T0604000-02,OS04T0629500-01,OS04T0629500-02,OS04T0643300-01,OS04T0643600-01,OS06T0188000-01,OS06T0682800-01,OS07T0260300-01,OS07T0298900-01…	BP	0.02687	0.0406036	34	886
GO:0031399	regulation of protein modification process	OS03T0308800-01,OS03T0308800-02,OS03T0308800-03,OS04T0234600-01,OS04T0234600-02,OS04T0234600-03,OS04T0414700-01,OS05T0213500-01,OS05T0301600-01	BP	0.02772	0.0416566	9	157
GO:0000459	exonucleolytic trimming involved in rRNA processing	OS12T0403800-01,OS12T0403800-02	BP	0.02867	0.0415906	2	10
GO:0000467	exonucleolytic trimming to generate mature 3'-end of 5.8S rRNA from tricistronic rRNA transcript (SSU-rRNA, 5.8S rRNA, LSU-rRNA)	OS12T0403800-01,OS12T0403800-02	BP	0.02867	0.0415906	2	10
GO:0006448	regulation of translational elongation	OS03T0856500-01,OS03T0856500-02	BP	0.02867	0.0415906	2	10
GO:0006882	cellular zinc ion homeostasis	OS02T0437800-01,OS02T0437800-02	BP	0.02867	0.0415906	2	10
GO:0010190	cytochrome b6f complex assembly	OS10T0522500-01,OS10T0522500-02	BP	0.02867	0.0415906	2	10
GO:0016078	tRNA catabolic process	OS12T0403800-01,OS12T0403800-02	BP	0.02867	0.0415906	2	10
GO:0043633	polyadenylation-dependent RNA catabolic process	OS12T0403800-01,OS12T0403800-02	BP	0.02867	0.0415906	2	10
GO:0043634	polyadenylation-dependent ncRNA catabolic process	OS12T0403800-01,OS12T0403800-02	BP	0.02867	0.0415906	2	10
GO:0071029	nuclear ncRNA surveillance	OS12T0403800-01,OS12T0403800-02	BP	0.02867	0.0415906	2	10
GO:0071035	nuclear polyadenylation-dependent rRNA catabolic process	OS12T0403800-01,OS12T0403800-02	BP	0.02867	0.0415906	2	10
GO:0071038	nuclear polyadenylation-dependent tRNA catabolic process	OS12T0403800-01,OS12T0403800-02	BP	0.02867	0.0415906	2	10
GO:0071046	nuclear polyadenylation-dependent ncRNA catabolic process	OS12T0403800-01,OS12T0403800-02	BP	0.02867	0.0415906	2	10
GO:0009696	salicylic acid metabolic process	OS04T0234600-01,OS04T0234600-02,OS04T0234600-03,OS08T0130000-00	BP	0.02879	0.0403654	4	43
GO:1901137	carbohydrate derivative biosynthetic process	OS01T0118000-01,OS01T0877400-01,OS02T0802700-01,OS03T0645100-01,OS03T0645100-02,OS03T0645100-03,OS03T0776000-01,OS03T0856300-01,OS04T0234600-01,OS04T0234600-02,OS04T0234600-03,OS05T0199500-01,OS05T0199500-02,OS05T0290300-00,OS05T0301700-01,OS06T0127900-01,OS07T0661100-01,OS10T0206800-01,OS10T0206800-02,OS10T0355800-00,OS12T0265400-00,OS12T0265600-01	BP	0.02936	0.0409534	22	524
GO:0031571	mitotic G1 DNA damage checkpoint	OS10T0126700-01,OS10T0126800-01,OS10T0127000-01	BP	0.02939	0.0403741	3	25
GO:0044783	G1 DNA damage checkpoint	OS10T0126700-01,OS10T0126800-01,OS10T0127000-01	BP	0.02939	0.0403741	3	25
GO:0044819	mitotic G1/S transition checkpoint	OS10T0126700-01,OS10T0126800-01,OS10T0127000-01	BP	0.02939	0.0403741	3	25
GO:1902807	negative regulation of cell cycle G1/S phase transition	OS10T0126700-01,OS10T0126800-01,OS10T0127000-01	BP	0.02939	0.0403741	3	25
GO:2000134	negative regulation of G1/S transition of mitotic cell cycle	OS10T0126700-01,OS10T0126800-01,OS10T0127000-01	BP	0.02939	0.0403741	3	25
GO:0051049	regulation of transport	OS02T0437800-01,OS02T0437800-02,OS08T0390000-01,OS08T0390000-02,OS09T0346400-01,OS09T0346400-02	BP	0.02953	0.0398618	6	86
GO:0071824	protein-DNA complex subunit organization	OS02T0199900-01,OS02T0199900-02,OS02T0199900-03,OS03T0193600-00,OS05T0489800-01,OS06T0607800-01	BP	0.02953	0.0398618	6	86
GO:0030162	regulation of proteolysis	OS02T0124000-01,OS02T0199900-01,OS02T0199900-02,OS02T0199900-03,OS06T0607800-01,OS08T0523200-00,OS08T0523400-00,OS08T0523700-00	BP	0.0299	0.0400631	8	134
GO:0034976	response to endoplasmic reticulum stress	OS02T0199900-01,OS02T0199900-02,OS02T0199900-03,OS03T0427900-01,OS06T0150400-01,OS06T0607800-01,OS08T0130000-00	BP	0.03036	0.04048	7	110
GO:0032392	DNA geometric change	OS03T0856200-01,OS03T0856200-03,OS03T0856200-04,OS10T0161700-01	BP	0.03101	0.0409452	4	44
GO:0032508	DNA duplex unwinding	OS03T0856200-01,OS03T0856200-03,OS03T0856200-04,OS10T0161700-01	BP	0.03101	0.0409452	4	44
GO:0046189	phenol-containing compound biosynthetic process	OS04T0234600-01,OS04T0234600-02,OS04T0234600-03,OS08T0130000-00	BP	0.03101	0.0409452	4	44
GO:0031347	regulation of defense response	OS02T0437800-01,OS02T0437800-02,OS04T0234600-01,OS04T0234600-02,OS04T0234600-03,OS08T0130000-00,OS08T0335600-01	BP	0.03168	0.0414277	7	111
GO:0006352	DNA-templated transcription, initiation	OS02T0199900-01,OS02T0199900-02,OS02T0199900-03,OS02T0633100-02,OS03T0193600-00,OS06T0607800-01	BP	0.03256	0.042173	6	88
GO:0006486	protein glycosylation	OS01T0877400-01,OS05T0199500-01,OS05T0199500-02,OS07T0661100-01,OS12T0265400-00,OS12T0265600-01	BP	0.03256	0.042173	6	88
GO:0043413	macromolecule glycosylation	OS01T0877400-01,OS05T0199500-01,OS05T0199500-02,OS07T0661100-01,OS12T0265400-00,OS12T0265600-01	BP	0.03256	0.042173	6	88
GO:0010114	response to red light	OS03T0308800-01,OS03T0308800-02,OS03T0308800-03,OS07T0558400-01	BP	0.03333	0.042763	4	45
GO:0050801	ion homeostasis	OS01T0933200-00,OS02T0437800-01,OS02T0437800-02,OS02T0584700-01,OS02T0584800-01,OS02T0585100-00,OS02T0585200-01,OS04T0414700-01,OS07T0298900-01,OS08T0502700-01,OS08T0502700-03,OS09T0286400-01	BP	0.03407	0.0435072	12	243
GO:0009566	fertilization	OS05T0489800-01,OS10T0556200-01	BP	0.03442	0.0430448	2	11
GO:0009567	double fertilization forming a zygote and endosperm	OS05T0489800-01,OS10T0556200-01	BP	0.03442	0.0430448	2	11
GO:0015802	basic amino acid transport	OS02T0437800-01,OS02T0437800-02	BP	0.03442	0.0430448	2	11
GO:0030835	negative regulation of actin filament depolymerization	OS04T0604000-01,OS04T0604000-02	BP	0.03442	0.0430448	2	11
GO:0034497	protein localization to phagophore assembly site	OS02T0791800-01,OS02T0791800-02	BP	0.03442	0.0430448	2	11
GO:0043242	negative regulation of protein complex disassembly	OS04T0604000-01,OS04T0604000-02	BP	0.03442	0.0430448	2	11
GO:0051693	actin filament capping	OS04T0604000-01,OS04T0604000-02	BP	0.03442	0.0430448	2	11
GO:1901880	negative regulation of protein depolymerization	OS04T0604000-01,OS04T0604000-02	BP	0.03442	0.0430448	2	11
GO:0006637	acyl-CoA metabolic process	OS03T0645100-01,OS03T0645100-02,OS03T0645100-03,OS04T0643300-01	BP	0.03575	0.0437034	4	46
GO:0035383	thioester metabolic process	OS03T0645100-01,OS03T0645100-02,OS03T0645100-03,OS04T0643300-01	BP	0.03575	0.0437034	4	46
GO:0006563	L-serine metabolic process	OS06T0149700-00,OS06T0149900-01,OS12T0409000-01	BP	0.03593	0.0434354	3	27
GO:1902806	regulation of cell cycle G1/S phase transition	OS10T0126700-01,OS10T0126800-01,OS10T0127000-01	BP	0.03593	0.0434354	3	27
GO:2000045	regulation of G1/S transition of mitotic cell cycle	OS10T0126700-01,OS10T0126800-01,OS10T0127000-01	BP	0.03593	0.0434354	3	27
GO:0015979	photosynthesis	OS01T0501800-01,OS02T0197600-01,OS02T0197600-02,OS02T0197600-03,OS04T0414700-01,OS05T0508900-01,OS06T0107700-01,OS07T0544800-01,OS07T0558400-01	BP	0.03643	0.0436518	9	165
GO:1901607	alpha-amino acid biosynthetic process	OS02T0197600-01,OS02T0197600-02,OS02T0197600-03,OS04T0234600-01,OS04T0234600-02,OS04T0234600-03,OS04T0414700-01,OS06T0149700-00,OS06T0149900-01,OS08T0502700-01,OS08T0502700-03	BP	0.03727	0.0444625	11	219
GO:0048583	regulation of response to stimulus	OS01T0737800-01,OS01T0737800-02,OS02T0437800-01,OS02T0437800-02,OS04T0234600-01,OS04T0234600-02,OS04T0234600-03,OS05T0301600-01,OS06T0150100-01,OS08T0130000-00,OS08T0335600-01,OS12T0137500-01	BP	0.03787	0.044981	12	247
GO:0007093	mitotic cell cycle checkpoint	OS02T0741500-01,OS10T0126700-01,OS10T0126800-01,OS10T0127000-01	BP	0.03827	0.0450625	4	47
GO:0010948	negative regulation of cell cycle process	OS02T0741500-01,OS10T0126700-01,OS10T0126800-01,OS10T0127000-01	BP	0.03827	0.0450625	4	47
GO:0045930	negative regulation of mitotic cell cycle	OS02T0741500-01,OS10T0126700-01,OS10T0126800-01,OS10T0127000-01	BP	0.03827	0.0450625	4	47
GO:0009101	glycoprotein biosynthetic process	OS01T0877400-01,OS05T0199500-01,OS05T0199500-02,OS07T0661100-01,OS12T0265400-00,OS12T0265600-01	BP	0.0392	0.0457614	6	92
GO:0009627	systemic acquired resistance	OS04T0234600-01,OS04T0234600-02,OS04T0234600-03,OS06T0150400-01,OS08T0335600-01	BP	0.03936	0.0457518	5	69
GO:0030834	regulation of actin filament depolymerization	OS04T0604000-01,OS04T0604000-02	BP	0.04058	0.0462799	2	12
GO:0034475	U4 snRNA 3'-end processing	OS12T0403800-01,OS12T0403800-02	BP	0.04058	0.0462799	2	12
GO:0042548	regulation of photosynthesis, light reaction	OS01T0501800-01,OS05T0508900-01	BP	0.04058	0.0462799	2	12
GO:0043467	regulation of generation of precursor metabolites and energy	OS01T0501800-01,OS05T0508900-01	BP	0.04058	0.0462799	2	12
GO:0055069	zinc ion homeostasis	OS02T0437800-01,OS02T0437800-02	BP	0.04058	0.0462799	2	12
GO:1901879	regulation of protein depolymerization	OS04T0604000-01,OS04T0604000-02	BP	0.04058	0.0462799	2	12
GO:1901989	positive regulation of cell cycle phase transition	OS03T0197400-01,OS03T0197400-02	BP	0.04058	0.0462799	2	12
GO:1901992	positive regulation of mitotic cell cycle phase transition	OS03T0197400-01,OS03T0197400-02	BP	0.04058	0.0462799	2	12
GO:0006367	transcription initiation from RNA polymerase II promoter	OS02T0199900-01,OS02T0199900-02,OS02T0199900-03,OS06T0607800-01	BP	0.04088	0.045478	4	48
GO:0018958	phenol-containing compound metabolic process	OS04T0234600-01,OS04T0234600-02,OS04T0234600-03,OS08T0130000-00	BP	0.04088	0.045478	4	48
GO:0046834	lipid phosphorylation	OS03T0711200-01,OS07T0558200-01,OS07T0558200-02,OS07T0558300-01	BP	0.04088	0.045478	4	48
GO:0046854	phosphatidylinositol phosphorylation	OS03T0711200-01,OS07T0558200-01,OS07T0558200-02,OS07T0558300-01	BP	0.04088	0.045478	4	48
GO:0022411	cellular component disassembly	OS02T0791800-01,OS02T0791800-02,OS04T0604000-01,OS04T0604000-02,OS07T0297500-00	BP	0.04149	0.0454136	5	70
GO:0031329	regulation of cellular catabolic process	OS02T0199900-01,OS02T0199900-02,OS02T0199900-03,OS06T0607800-01,OS06T0682800-01	BP	0.04149	0.0454136	5	70
GO:0042537	benzene-containing compound metabolic process	OS04T0234600-01,OS04T0234600-02,OS04T0234600-03,OS08T0130000-00,OS08T0319900-01	BP	0.04149	0.0454136	5	70
GO:0055065	metal ion homeostasis	OS01T0933200-00,OS02T0437800-01,OS02T0437800-02,OS02T0584700-01,OS02T0584800-01,OS02T0585100-00,OS02T0585200-01,OS07T0298900-01	BP	0.04149	0.0454136	8	143
GO:0050789	regulation of biological process	OS01T0191300-01,OS01T0191300-02,OS01T0191300-03,OS01T0501800-01,OS01T0737800-01,OS01T0737800-02,OS01T0743800-00,OS01T0822200-01,OS01T0932950-00,OS01T0967200-01,OS01T0975300-01,OS01T0975300-02,OS01T0975800-00,OS02T0124000-01,OS02T0197750-00,OS02T0199900-01,OS02T0199900-02,OS02T0199900-03,OS02T0283800-01,OS02T0437800-01,OS02T0437800-02,OS02T0633100-02,OS02T0702100-01,OS02T0741500-01,OS02T0766700-01…	BP	0.04232	0.0458607	123	3939
GO:1903047	mitotic cell cycle process	OS02T0741500-01,OS03T0197400-01,OS03T0197400-02,OS05T0489800-01,OS06T0127800-01,OS10T0126700-01,OS10T0126800-01,OS10T0127000-01,OS11T0368172-01,OS12T0263100-01	BP	0.04305	0.0464667	10	197
GO:0000086	G2/M transition of mitotic cell cycle	OS03T0197400-01,OS03T0197400-02,OS05T0489800-01	BP	0.04315	0.0462079	3	29
GO:0010389	regulation of G2/M transition of mitotic cell cycle	OS03T0197400-01,OS03T0197400-02,OS05T0489800-01	BP	0.04315	0.0462079	3	29
GO:0044773	mitotic DNA damage checkpoint	OS10T0126700-01,OS10T0126800-01,OS10T0127000-01	BP	0.04315	0.0462079	3	29
GO:0009267	cellular response to starvation	OS02T0791800-01,OS02T0791800-02,OS03T0856400-01,OS03T0856400-02	BP	0.0436	0.046325	4	49
GO:0080134	regulation of response to stress	OS02T0437800-01,OS02T0437800-02,OS04T0234600-01,OS04T0234600-02,OS04T0234600-03,OS06T0150100-01,OS08T0130000-00,OS08T0335600-01	BP	0.04442	0.0470126	8	145
GO:0035556	intracellular signal transduction	OS01T0743800-00,OS01T0932950-00,OS01T0975800-00,OS03T0711200-01,OS03T0711300-01,OS03T0711300-02,OS04T0234600-01,OS04T0234600-02,OS04T0234600-03,OS04T0546300-01,OS06T0108500-01,OS08T0424700-00,OS10T0482900-01,OS11T0586900-01,OS11T0586900-02	BP	0.04638	0.0488967	15	341
GO:0065007	biological regulation	OS01T0191300-01,OS01T0191300-02,OS01T0191300-03,OS01T0501800-01,OS01T0737800-01,OS01T0737800-02,OS01T0743800-00,OS01T0822200-01,OS01T0932950-00,OS01T0933200-00,OS01T0967200-01,OS01T0975300-01,OS01T0975300-02,OS01T0975800-00,OS02T0124000-01,OS02T0197750-00,OS02T0199900-01,OS02T0199900-02,OS02T0199900-03,OS02T0283800-01,OS02T0437800-01,OS02T0437800-02,OS02T0584700-01,OS02T0584800-01,OS02T0585100-00…	BP	0.04668	0.049023	141	4590
GO:0043632	modification-dependent macromolecule catabolic process	OS01T0534800-01,OS01T0534800-02,OS02T0199900-01,OS02T0199900-02,OS02T0199900-03,OS02T0572200-01,OS03T0427900-01,OS03T0776400-01,OS04T0464500-01,OS06T0311300-01,OS06T0607800-01,OS07T0661300-01,OS08T0523200-00,OS08T0523400-00,OS08T0523700-00,OS10T0126700-01,OS10T0126800-01,OS10T0127000-01,OS10T0540000-01,OS11T0473200-01,OS12T0403800-01,OS12T0403800-02,OS12T0595600-00	BP	0.04697	0.0491378	23	582
GO:0000082	G1/S transition of mitotic cell cycle	OS10T0126700-01,OS10T0126800-01,OS10T0127000-01	BP	0.047	0.0486084	3	30
GO:0017004	cytochrome complex assembly	OS10T0522500-01,OS10T0522500-02,OS12T0137300-01	BP	0.047	0.0486084	3	30
GO:0044839	cell cycle G2/M phase transition	OS03T0197400-01,OS03T0197400-02,OS05T0489800-01	BP	0.047	0.0486084	3	30
GO:0044843	cell cycle G1/S phase transition	OS10T0126700-01,OS10T0126800-01,OS10T0127000-01	BP	0.047	0.0486084	3	30
GO:1902749	regulation of cell cycle G2/M phase transition	OS03T0197400-01,OS03T0197400-02,OS05T0489800-01	BP	0.047	0.0486084	3	30
GO:0006535	cysteine biosynthetic process from serine	OS06T0149700-00,OS06T0149900-01	BP	0.04711	0.0479025	2	13
GO:0034472	snRNA 3'-end processing	OS12T0403800-01,OS12T0403800-02	BP	0.04711	0.0479025	2	13
GO:0045931	positive regulation of mitotic cell cycle	OS03T0197400-01,OS03T0197400-02	BP	0.04711	0.0479025	2	13
GO:0070475	rRNA base methylation	OS09T0551300-01,OS09T0551300-02	BP	0.04711	0.0479025	2	13
GO:0015672	monovalent inorganic cation transport	OS02T0796700-01,OS04T0643600-01,OS05T0301700-01,OS06T0188000-01,OS08T0390000-01,OS08T0390000-02,OS09T0286400-01,OS09T0346400-01,OS09T0346400-02,OS10T0355800-00	BP	0.04818	0.0485369	10	201
GO:0050794	regulation of cellular process	OS01T0191300-01,OS01T0191300-02,OS01T0191300-03,OS01T0501800-01,OS01T0737800-01,OS01T0737800-02,OS01T0743800-00,OS01T0822200-01,OS01T0932950-00,OS01T0967200-01,OS01T0975300-01,OS01T0975300-02,OS01T0975800-00,OS02T0124000-01,OS02T0197750-00,OS02T0199900-01,OS02T0199900-02,OS02T0199900-03,OS02T0283800-01,OS02T0437800-01,OS02T0437800-02,OS02T0633100-02,OS02T0702100-01,OS02T0741500-01,OS02T0766700-01…	BP	0.04822	0.0483979	111	3538
GO:0009266	response to temperature stimulus	OS02T0197600-01,OS02T0197600-02,OS02T0197600-03,OS03T0370600-00,OS03T0856200-01,OS03T0856200-03,OS03T0856200-04,OS04T0234600-01,OS04T0234600-02,OS04T0234600-03,OS04T0643300-01	BP	0.04996	0.04996	11	230
GO:0016780	phosphotransferase activity, for other substituted phosphate groups	OS02T0119800-01,OS02T0119800-02,OS04T0423700-01,OS06T0204400-01,OS06T0204400-02,OS07T0661100-01	MF	1.9e-06	0.0001406	6	16
GO:0016765	transferase activity, transferring alkyl or aryl (other than methyl) groups	OS01T0737800-01,OS01T0737800-02,OS02T0197700-01,OS06T0149700-00,OS06T0149900-01,OS10T0368100-01,OS10T0529400-01,OS10T0529500-01,OS10T0529700-01,OS10T0529800-00,OS10T0530200-01,OS10T0530400-01,OS10T0530600-01,OS10T0543800-00,OS11T0303800-01	MF	2.2e-05	0.000814	15	162
GO:0004364	glutathione transferase activity	OS10T0368100-01,OS10T0529400-01,OS10T0529500-01,OS10T0529700-01,OS10T0529800-00,OS10T0530200-01,OS10T0530400-01,OS10T0530600-01,OS10T0543800-00,OS11T0303800-01	MF	4.2e-05	0.001036	10	80
GO:0003774	motor activity	OS01T0744000-01,OS01T0744000-02,OS04T0629700-01,OS04T0629700-02,OS04T0629700-03,OS10T0488800-01,OS10T0488800-02	MF	8.1e-05	0.0014985	7	41
GO:0003777	microtubule motor activity	OS01T0744000-01,OS01T0744000-02,OS04T0629700-01,OS04T0629700-02,OS04T0629700-03	MF	0.00033	0.00407	5	24
GO:0017025	TBP-class protein binding	OS02T0199900-01,OS02T0199900-02,OS02T0199900-03,OS03T0193600-00,OS06T0607800-01	MF	0.00033	0.00407	5	24
GO:0050278	sedoheptulose-bisphosphatase activity	OS04T0234600-01,OS04T0234600-02,OS04T0234600-03	MF	0.00033	0.00407	3	6
GO:0036402	proteasome-activating ATPase activity	OS02T0199900-01,OS02T0199900-02,OS02T0199900-03,OS06T0607800-01	MF	0.00049	0.0045325	4	15
GO:0003843	1,3-beta-D-glucan synthase activity	OS01T0754200-01,OS01T0754200-02,OS01T0754200-03,OS01T0754200-04	MF	0.00082	0.00674222	4	17
GO:0031409	pigment binding	OS02T0197600-01,OS02T0197600-02,OS02T0197600-03,OS07T0558400-01	MF	0.00158	0.011692	4	20
GO:0004738	pyruvate dehydrogenase activity	OS03T0645100-01,OS03T0645100-02,OS03T0645100-03	MF	0.00183	0.0117757	3	10
GO:0004739	pyruvate dehydrogenase (acetyl-transferring) activity	OS03T0645100-01,OS03T0645100-02,OS03T0645100-03	MF	0.00183	0.0117757	3	10
GO:0004970	ionotropic glutamate receptor activity	OS02T0787600-01,OS02T0787600-02,OS06T0188600-01,OS09T0429500-00	MF	0.00191	0.00911871	4	21
GO:0005230	extracellular ligand-gated ion channel activity	OS02T0787600-01,OS02T0787600-02,OS06T0188600-01,OS09T0429500-00	MF	0.00191	0.00911871	4	21
GO:0008066	glutamate receptor activity	OS02T0787600-01,OS02T0787600-02,OS06T0188600-01,OS09T0429500-00	MF	0.00191	0.00911871	4	21
GO:0022824	transmitter-gated ion channel activity	OS02T0787600-01,OS02T0787600-02,OS06T0188600-01,OS09T0429500-00	MF	0.00191	0.00911871	4	21
GO:0022835	transmitter-gated channel activity	OS02T0787600-01,OS02T0787600-02,OS06T0188600-01,OS09T0429500-00	MF	0.00191	0.00911871	4	21
GO:0030594	neurotransmitter receptor activity	OS02T0787600-01,OS02T0787600-02,OS06T0188600-01,OS09T0429500-00	MF	0.00191	0.00911871	4	21
GO:0016434	rRNA (cytosine) methyltransferase activity	OS09T0551300-01,OS09T0551300-02	MF	0.00199	0.00775053	2	3
GO:0015276	ligand-gated ion channel activity	OS02T0787600-01,OS02T0787600-02,OS06T0188600-01,OS09T0429500-00	MF	0.00271	0.00954952	4	23
GO:0016168	chlorophyll binding	OS02T0197600-01,OS02T0197600-02,OS02T0197600-03,OS07T0558400-01	MF	0.00271	0.00954952	4	23
GO:0022834	ligand-gated channel activity	OS02T0787600-01,OS02T0787600-02,OS06T0188600-01,OS09T0429500-00	MF	0.00271	0.00954952	4	23
GO:0017111	nucleoside-triphosphatase activity	OS01T0118100-01,OS01T0164500-01,OS01T0227300-01,OS01T0534700-00,OS01T0744000-01,OS01T0744000-02,OS02T0199900-01,OS02T0199900-02,OS02T0199900-03,OS02T0519900-01,OS02T0519900-02,OS02T0519900-03,OS02T0519900-04,OS02T0519900-05,OS03T0312600-01,OS03T0312600-02,OS03T0334700-01,OS03T0856200-01,OS03T0856200-03,OS03T0856200-04,OS04T0629700-01,OS04T0629700-02,OS04T0629700-03,OS06T0607700-01,OS06T0607800-01…	MF	0.00314	0.0101026	31	704
GO:0019784	NEDD8-specific protease activity	OS03T0197400-01,OS03T0197400-02	MF	0.00392	0.0120867	2	4
GO:0033897	ribonuclease T2 activity	OS09T0537700-02,OS09T0538000-01,OS09T0538000-04	MF	0.00412	0.0121952	3	13
GO:0004003	ATP-dependent DNA helicase activity	OS03T0856200-01,OS03T0856200-03,OS03T0856200-04,OS10T0161700-01	MF	0.0043	0.0122385	4	26
GO:0008134	transcription factor binding	OS01T0975300-01,OS01T0975300-02,OS02T0199900-01,OS02T0199900-02,OS02T0199900-03,OS02T0469900-01,OS03T0193600-00,OS06T0607800-01,OS07T0558100-00	MF	0.00463	0.0126896	9	122
GO:0022839	ion gated channel activity	OS02T0787600-01,OS02T0787600-02,OS04T0643600-01,OS06T0188000-01,OS06T0188600-01,OS09T0429500-00	MF	0.00584	0.0154343	6	63
GO:0008453	alanine-glyoxylate transaminase activity	OS08T0502700-01,OS08T0502700-03	MF	0.00642	0.0163821	2	5
GO:0004519	endonuclease activity	OS01T0737900-01,OS02T0119700-01,OS02T0470000-01,OS04T0414800-00,OS04T0628200-01,OS04T0643700-01,OS04T0643700-02,OS04T0643700-03,OS06T0143500-00,OS06T0231100-00,OS06T0231400-01,OS07T0158200-01,OS07T0588100-00,OS08T0177600-00,OS09T0537700-02,OS09T0538000-01,OS09T0538000-04,OS10T0488900-01,OS10T0540100-01,OS10T0558600-00,OS11T0587100-00,OS11T0607100-01	MF	0.00649	0.0160087	22	473
GO:0008378	galactosyltransferase activity	OS01T0877400-01,OS05T0199500-01,OS05T0199500-02,OS12T0265400-00,OS12T0265600-01	MF	0.00666	0.0158981	5	46
GO:0043621	protein self-association	OS03T0308800-01,OS03T0308800-02,OS03T0308800-03	MF	0.00762	0.0176213	3	16
GO:0022836	gated channel activity	OS02T0787600-01,OS02T0787600-02,OS04T0643600-01,OS06T0188000-01,OS06T0188600-01,OS09T0429500-00	MF	0.00787	0.0176479	6	67
GO:0016462	pyrophosphatase activity	OS01T0118100-01,OS01T0164500-01,OS01T0227300-01,OS01T0534700-00,OS01T0744000-01,OS01T0744000-02,OS02T0199900-01,OS02T0199900-02,OS02T0199900-03,OS02T0519900-01,OS02T0519900-02,OS02T0519900-03,OS02T0519900-04,OS02T0519900-05,OS03T0312600-01,OS03T0312600-02,OS03T0334700-01,OS03T0856200-01,OS03T0856200-03,OS03T0856200-04,OS04T0629700-01,OS04T0629700-02,OS04T0629700-03,OS06T0607700-01,OS06T0607800-01…	MF	0.00801	0.0174335	31	752
GO:0008169	C-methyltransferase activity	OS09T0551300-01,OS09T0551300-02	MF	0.00946	0.0194456	2	6
GO:0043024	ribosomal small subunit binding	OS03T0856500-01,OS03T0856500-02	MF	0.00946	0.0194456	2	6
GO:0080025	phosphatidylinositol-3,5-bisphosphate binding	OS02T0791800-01,OS02T0791800-02	MF	0.00946	0.0194456	2	6
GO:0015631	tubulin binding	OS01T0744000-01,OS01T0744000-02,OS04T0629700-01,OS04T0629700-02,OS04T0629700-03,OS10T0498900-01,OS11T0368172-01	MF	0.00958	0.0186558	7	91
GO:0016818	hydrolase activity, acting on acid anhydrides, in phosphorus-containing anhydrides	OS01T0118100-01,OS01T0164500-01,OS01T0227300-01,OS01T0534700-00,OS01T0744000-01,OS01T0744000-02,OS02T0199900-01,OS02T0199900-02,OS02T0199900-03,OS02T0519900-01,OS02T0519900-02,OS02T0519900-03,OS02T0519900-04,OS02T0519900-05,OS03T0312600-01,OS03T0312600-02,OS03T0334700-01,OS03T0856200-01,OS03T0856200-03,OS03T0856200-04,OS04T0629700-01,OS04T0629700-02,OS04T0629700-03,OS06T0607700-01,OS06T0607800-01…	MF	0.01045	0.0198282	31	767
GO:0016892	endoribonuclease activity, producing 3'-phosphomonoesters	OS09T0537700-02,OS09T0538000-01,OS09T0538000-04	MF	0.01069	0.0195323	3	18
GO:0016894	endonuclease activity, active with either ribo- or deoxyribonucleic acids and producing 3'-phosphomonoesters	OS09T0537700-02,OS09T0538000-01,OS09T0538000-04	MF	0.01069	0.0195323	3	18
GO:0016903	oxidoreductase activity, acting on the aldehyde or oxo group of donors	OS01T0591300-01,OS01T0591300-02,OS03T0645100-01,OS03T0645100-02,OS03T0645100-03,OS08T0298700-01	MF	0.01106	0.0194867	6	72
GO:0003746	translation elongation factor activity	OS02T0519900-01,OS02T0519900-02,OS02T0519900-03,OS02T0519900-04,OS02T0519900-05	MF	0.01112	0.0191367	5	52
GO:0008092	cytoskeletal protein binding	OS01T0744000-01,OS01T0744000-02,OS04T0604000-01,OS04T0604000-02,OS04T0629700-01,OS04T0629700-02,OS04T0629700-03,OS07T0297500-00,OS10T0498900-01,OS11T0368172-01	MF	0.01128	0.0189709	10	165
GO:0016817	hydrolase activity, acting on acid anhydrides	OS01T0118100-01,OS01T0164500-01,OS01T0227300-01,OS01T0534700-00,OS01T0744000-01,OS01T0744000-02,OS02T0199900-01,OS02T0199900-02,OS02T0199900-03,OS02T0519900-01,OS02T0519900-02,OS02T0519900-03,OS02T0519900-04,OS02T0519900-05,OS03T0312600-01,OS03T0312600-02,OS03T0334700-01,OS03T0856200-01,OS03T0856200-03,OS03T0856200-04,OS04T0629700-01,OS04T0629700-02,OS04T0629700-03,OS06T0607700-01,OS06T0607800-01…	MF	0.01199	0.0197169	31	775
GO:0008235	metalloexopeptidase activity	OS02T0119300-01,OS02T0218200-01,OS02T0218200-02	MF	0.01245	0.0198129	3	19
GO:0016624	oxidoreductase activity, acting on the aldehyde or oxo group of donors, disulfide as acceptor	OS03T0645100-01,OS03T0645100-02,OS03T0645100-03	MF	0.01245	0.0198129	3	19
GO:0008318	protein prenyltransferase activity	OS01T0737800-01,OS01T0737800-02	MF	0.01302	0.0200725	2	7
GO:0005216	ion channel activity	OS02T0787600-01,OS02T0787600-02,OS04T0643600-01,OS06T0188000-01,OS06T0188600-01,OS09T0429500-00	MF	0.01337	0.0199875	6	75
GO:0022838	substrate-specific channel activity	OS02T0787600-01,OS02T0787600-02,OS04T0643600-01,OS06T0188000-01,OS06T0188600-01,OS09T0429500-00	MF	0.01337	0.0199875	6	75
GO:0042162	telomeric DNA binding	OS03T0856200-01,OS03T0856200-03,OS03T0856200-04	MF	0.01644	0.0238541	3	21
GO:0008017	microtubule binding	OS01T0744000-01,OS01T0744000-02,OS04T0629700-01,OS04T0629700-02,OS04T0629700-03,OS10T0498900-01	MF	0.01693	0.0240927	6	79
GO:0017091	AU-rich element binding	OS12T0403800-01,OS12T0403800-02	MF	0.01706	0.023597	2	8
GO:1902936	phosphatidylinositol bisphosphate binding	OS02T0791800-01,OS02T0791800-02	MF	0.01706	0.023597	2	8
GO:0015267	channel activity	OS02T0787600-01,OS02T0787600-02,OS04T0643600-01,OS06T0188000-01,OS06T0188600-01,OS09T0429500-00	MF	0.01894	0.0252533	6	81
GO:0022803	passive transmembrane transporter activity	OS02T0787600-01,OS02T0787600-02,OS04T0643600-01,OS06T0188000-01,OS06T0188600-01,OS09T0429500-00	MF	0.01894	0.0252533	6	81
GO:0016887	ATPase activity	OS01T0164500-01,OS01T0534700-00,OS01T0744000-01,OS01T0744000-02,OS02T0199900-01,OS02T0199900-02,OS02T0199900-03,OS03T0334700-01,OS03T0856200-01,OS03T0856200-03,OS03T0856200-04,OS04T0629700-01,OS04T0629700-02,OS04T0629700-03,OS06T0607700-01,OS06T0607800-01,OS10T0161700-01,OS10T0355800-00,OS12T0136900-00,OS12T0481100-01	MF	0.02122	0.0275488	20	468
GO:0019902	phosphatase binding	OS08T0424700-00,OS12T0137500-01	MF	0.02156	0.0270414	2	9
GO:0019903	protein phosphatase binding	OS08T0424700-00,OS12T0137500-01	MF	0.02156	0.0270414	2	9
GO:1901981	phosphatidylinositol phosphate binding	OS02T0791800-01,OS02T0791800-02	MF	0.02156	0.0270414	2	9
GO:0004252	serine-type endopeptidase activity	OS01T0795000-01,OS01T0795100-00,OS02T0326700-01,OS02T0665300-01,OS02T0665300-02,OS03T0605300-01,OS05T0592100-01,OS06T0624100-00	MF	0.02403	0.0291511	8	134
GO:0003723	RNA binding	OS01T0164500-01,OS01T0737900-01,OS02T0119700-01,OS02T0470000-01,OS02T0519900-01,OS02T0519900-02,OS02T0519900-03,OS02T0519900-04,OS02T0519900-05,OS03T0193600-00,OS03T0308800-01,OS03T0308800-02,OS03T0308800-03,OS03T0370500-02,OS03T0801800-01,OS04T0414800-00,OS04T0627900-01,OS04T0628000-01,OS04T0628200-01,OS04T0643700-01,OS04T0643700-02,OS04T0643700-03,OS05T0105600-01,OS06T0143500-00,OS06T0231100-00…	MF	0.02424	0.0289316	47	1347
GO:0003678	DNA helicase activity	OS03T0856200-01,OS03T0856200-03,OS03T0856200-04,OS10T0161700-01	MF	0.02513	0.0295178	4	43
GO:0003756	protein disulfide isomerase activity	OS04T0629500-01,OS04T0629500-02	MF	0.02649	0.0299276	2	10
GO:0016864	intramolecular oxidoreductase activity, transposing S-S bonds	OS04T0629500-01,OS04T0629500-02	MF	0.02649	0.0299276	2	10
GO:0019209	kinase activator activity	OS03T0856400-01,OS03T0856400-02	MF	0.02649	0.0299276	2	10
GO:0030295	protein kinase activator activity	OS03T0856400-01,OS03T0856400-02	MF	0.02649	0.0299276	2	10
GO:0019904	protein domain specific binding	OS02T0197600-01,OS02T0197600-02,OS02T0197600-03	MF	0.02922	0.0317982	3	26
GO:0004518	nuclease activity	OS01T0737900-01,OS02T0119700-01,OS02T0470000-01,OS04T0414800-00,OS04T0628200-01,OS04T0643700-01,OS04T0643700-02,OS04T0643700-03,OS06T0143500-00,OS06T0231100-00,OS06T0231400-01,OS07T0158200-01,OS07T0588100-00,OS08T0177600-00,OS09T0537700-02,OS09T0538000-01,OS09T0538000-04,OS10T0488900-01,OS10T0540100-01,OS10T0558600-00,OS11T0587100-00,OS11T0607100-01	MF	0.02957	0.0317128	22	547
GO:0004124	cysteine synthase activity	OS06T0149700-00,OS06T0149900-01	MF	0.03183	0.0336489	2	11
GO:0016860	intramolecular oxidoreductase activity	OS01T0205600-01,OS03T0776000-01,OS04T0629500-01,OS04T0629500-02	MF	0.03352	0.0349363	4	47
GO:0019783	ubiquitin-like protein-specific protease activity	OS03T0197400-01,OS03T0197400-02,OS07T0661300-01,OS11T0473200-01,OS11T0473350-00	MF	0.03372	0.0346567	5	69
GO:0008171	O-methyltransferase activity	OS11T0303600-01,OS11T0304050-00,OS12T0199500-00,OS12T0441600-00	MF	0.04075	0.0413082	4	50
GO:0008094	DNA-dependent ATPase activity	OS03T0856200-01,OS03T0856200-03,OS03T0856200-04,OS10T0161700-01	MF	0.04335	0.04335	4	51
GO:0044430	cytoskeletal part	OS01T0744000-01,OS01T0744000-02,OS03T0312600-01,OS03T0312600-02,OS04T0578300-00,OS04T0604000-01,OS04T0604000-02,OS04T0629700-01,OS04T0629700-02,OS04T0629700-03,OS10T0488800-01,OS10T0488800-02,OS10T0498900-01,OS11T0189900-00,OS11T0362633-00,OS11T0368172-01	CC	2e-05	0.00072	16	178
GO:0005856	cytoskeleton	OS01T0744000-01,OS01T0744000-02,OS03T0312600-01,OS03T0312600-02,OS04T0578300-00,OS04T0604000-01,OS04T0604000-02,OS04T0629700-01,OS04T0629700-02,OS04T0629700-03,OS07T0297500-00,OS10T0488800-01,OS10T0488800-02,OS10T0498900-01,OS11T0189900-00,OS11T0362633-00,OS11T0368172-01	CC	2e-05	0.00072	17	198
GO:0043564	Ku70:Ku80 complex	OS03T0856200-01,OS03T0856200-03,OS03T0856200-04	CC	7.1e-05	0.001278	3	4
GO:0015630	microtubule cytoskeleton	OS01T0744000-01,OS01T0744000-02,OS03T0312600-01,OS03T0312600-02,OS04T0578300-00,OS04T0629700-01,OS04T0629700-02,OS04T0629700-03,OS10T0498900-01,OS11T0189900-00,OS11T0362633-00,OS11T0368172-01	CC	0.00011	0.001485	12	124
GO:0005874	microtubule	OS01T0744000-01,OS01T0744000-02,OS03T0312600-01,OS03T0312600-02,OS04T0578300-00,OS04T0629700-01,OS04T0629700-02,OS04T0629700-03	CC	0.00066	0.007128	8	73
GO:0000148	1,3-beta-D-glucan synthase complex	OS01T0754200-01,OS01T0754200-02,OS01T0754200-03,OS01T0754200-04	CC	0.00086	0.00774	4	17
GO:0009532	plastid stroma	OS01T0118000-01,OS01T0164600-01,OS02T0197600-01,OS02T0197600-02,OS02T0197600-03,OS02T0803200-01,OS03T0308800-01,OS03T0308800-02,OS03T0308800-03,OS03T0856500-01,OS03T0856500-02,OS04T0234600-01,OS04T0234600-02,OS04T0234600-03,OS04T0643300-01,OS05T0592100-01,OS06T0107700-01,OS07T0158300-01,OS07T0558400-01,OS08T0167500-01,OS08T0167500-02,OS08T0502700-01,OS08T0502700-03,OS09T0382400-01	CC	0.00098	0.00756	24	453
GO:0031595	nuclear proteasome complex	OS02T0199900-01,OS02T0199900-02,OS02T0199900-03,OS06T0607800-01	CC	0.00135	0.0091125	4	19
GO:0009521	photosystem	OS01T0501800-01,OS02T0197600-01,OS02T0197600-02,OS02T0197600-03,OS04T0414700-01,OS05T0508900-01,OS07T0544800-01,OS07T0558400-01	CC	0.00142	0.00852	8	82
GO:0009523	photosystem II	OS01T0501800-01,OS02T0197600-01,OS02T0197600-02,OS02T0197600-03,OS05T0508900-01,OS07T0544800-01,OS07T0558400-01	CC	0.00143	0.007722	7	64
GO:0008540	proteasome regulatory particle, base subcomplex	OS02T0199900-01,OS02T0199900-02,OS02T0199900-03,OS06T0607800-01	CC	0.00165	0.00774783	4	20
GO:0031597	cytosolic proteasome complex	OS02T0199900-01,OS02T0199900-02,OS02T0199900-03,OS06T0607800-01	CC	0.00165	0.00774783	4	20
GO:0009570	chloroplast stroma	OS01T0118000-01,OS01T0164600-01,OS02T0197600-01,OS02T0197600-02,OS02T0197600-03,OS02T0803200-01,OS03T0308800-01,OS03T0308800-02,OS03T0308800-03,OS03T0856500-01,OS03T0856500-02,OS04T0234600-01,OS04T0234600-02,OS04T0234600-03,OS04T0643300-01,OS05T0592100-01,OS06T0107700-01,OS07T0158300-01,OS07T0558400-01,OS08T0167500-01,OS08T0167500-02,OS08T0502700-01,OS08T0502700-03	CC	0.00176	0.00731077	23	446
GO:0099080	supramolecular complex	OS01T0744000-01,OS01T0744000-02,OS03T0312600-01,OS03T0312600-02,OS04T0578300-00,OS04T0629700-01,OS04T0629700-02,OS04T0629700-03	CC	0.00257	0.00895355	8	90
GO:0099081	supramolecular polymer	OS01T0744000-01,OS01T0744000-02,OS03T0312600-01,OS03T0312600-02,OS04T0578300-00,OS04T0629700-01,OS04T0629700-02,OS04T0629700-03	CC	0.00257	0.00895355	8	90
GO:0099512	supramolecular fiber	OS01T0744000-01,OS01T0744000-02,OS03T0312600-01,OS03T0312600-02,OS04T0578300-00,OS04T0629700-01,OS04T0629700-02,OS04T0629700-03	CC	0.00257	0.00895355	8	90
GO:0099513	polymeric cytoskeletal fiber	OS01T0744000-01,OS01T0744000-02,OS03T0312600-01,OS03T0312600-02,OS04T0578300-00,OS04T0629700-01,OS04T0629700-02,OS04T0629700-03	CC	0.00257	0.00895355	8	90
GO:0009522	photosystem I	OS02T0197600-01,OS02T0197600-02,OS02T0197600-03,OS04T0414700-01,OS07T0558400-01	CC	0.00342	0.01026	5	39
GO:0009579	thylakoid	OS01T0118000-01,OS01T0501800-01,OS02T0197600-01,OS02T0197600-02,OS02T0197600-03,OS03T0856500-01,OS03T0856500-02,OS04T0234600-01,OS04T0234600-02,OS04T0234600-03,OS04T0414700-01,OS05T0508900-01,OS05T0592100-01,OS06T0107700-01,OS07T0158300-01,OS07T0544800-01,OS07T0558400-01,OS08T0167500-01,OS08T0167500-02,OS08T0515800-01	CC	0.00355	0.00983077	20	389
GO:1990234	transferase complex	OS01T0737800-01,OS01T0737800-02,OS01T0754200-01,OS01T0754200-02,OS01T0754200-03,OS01T0754200-04,OS01T0932600-01,OS03T0427900-01,OS03T0699400-01,OS07T0264800-01,OS08T0523200-00,OS08T0523400-00,OS08T0523700-00,OS09T0121050-00,OS09T0382400-01,OS10T0126700-01,OS10T0126800-01,OS10T0127000-01,OS10T0409900-01,OS10T0409900-02	CC	0.00355	0.00983077	20	389
GO:0031461	cullin-RING ubiquitin ligase complex	OS01T0932600-01,OS08T0523200-00,OS08T0523400-00,OS08T0523700-00,OS10T0126700-01,OS10T0126800-01,OS10T0127000-01,OS10T0409900-01,OS10T0409900-02	CC	0.0038	0.00977143	9	117
GO:1902494	catalytic complex	OS01T0501800-01,OS01T0737800-01,OS01T0737800-02,OS01T0754200-01,OS01T0754200-02,OS01T0754200-03,OS01T0754200-04,OS01T0932600-01,OS02T0199900-01,OS02T0199900-02,OS02T0199900-03,OS03T0370500-02,OS03T0427900-01,OS03T0699400-01,OS05T0301600-01,OS05T0301700-01,OS06T0127900-01,OS06T0607800-01,OS07T0264800-01,OS07T0544800-01,OS08T0523200-00,OS08T0523400-00,OS08T0523700-00,OS09T0121050-00,OS09T0382400-01…	CC	0.00597	0.0146536	32	758
GO:0000151	ubiquitin ligase complex	OS01T0932600-01,OS03T0427900-01,OS08T0523200-00,OS08T0523400-00,OS08T0523700-00,OS10T0126700-01,OS10T0126800-01,OS10T0127000-01,OS10T0409900-01,OS10T0409900-02	CC	0.00646	0.015167	10	150
GO:0048046	apoplast	OS04T0234600-01,OS04T0234600-02,OS04T0234600-03,OS04T0604200-01,OS04T0604300-01,OS06T0682700-00,OS08T0502700-01,OS08T0502700-03,OS09T0383000-00,OS11T0537350-00,OS12T0144200-00	CC	0.00736	0.01656	11	177
GO:0005762	mitochondrial large ribosomal subunit	OS07T0544900-01,OS10T0407100-01,OS10T0407100-02	CC	0.00789	0.0170424	3	16
GO:0019005	SCF ubiquitin ligase complex	OS08T0523200-00,OS08T0523400-00,OS08T0523700-00,OS10T0126700-01,OS10T0126800-01,OS10T0127000-01	CC	0.00895	0.0185885	6	68
GO:0005871	kinesin complex	OS01T0744000-01,OS01T0744000-02,OS04T0629700-01,OS04T0629700-02,OS04T0629700-03	CC	0.00915	0.0183	5	49
GO:0005875	microtubule associated complex	OS01T0744000-01,OS01T0744000-02,OS04T0629700-01,OS04T0629700-02,OS04T0629700-03,OS11T0189900-00	CC	0.00959	0.018495	6	69
GO:0000931	gamma-tubulin large complex	OS11T0362633-00,OS11T0368172-01	CC	0.01334	0.024012	2	7
GO:0008274	gamma-tubulin ring complex	OS11T0362633-00,OS11T0368172-01	CC	0.01334	0.024012	2	7
GO:0034045	phagophore assembly site membrane	OS02T0791800-01,OS02T0791800-02	CC	0.01334	0.024012	2	7
GO:0005887	integral component of plasma membrane	OS04T0423700-01,OS04T0435100-01,OS04T0643600-01,OS06T0143700-01,OS06T0188000-01,OS12T0136900-00	CC	0.01502	0.0253463	6	76
GO:0015629	actin cytoskeleton	OS04T0604000-01,OS04T0604000-02,OS07T0297500-00,OS10T0488800-01,OS10T0488800-02	CC	0.01579	0.0258382	5	56
GO:0000315	organellar large ribosomal subunit	OS07T0544900-01,OS10T0407100-01,OS10T0407100-02	CC	0.01701	0.0266243	3	21
GO:0031463	Cul3-RING ubiquitin ligase complex	OS01T0932600-01,OS10T0409900-01,OS10T0409900-02	CC	0.01701	0.0266243	3	21
GO:0000313	organellar ribosome	OS02T0803200-01,OS07T0544900-01,OS10T0407100-01,OS10T0407100-02	CC	0.01892	0.027613	4	39
GO:0005838	proteasome regulatory particle	OS02T0199900-01,OS02T0199900-02,OS02T0199900-03,OS06T0607800-01	CC	0.01892	0.027613	4	39
GO:0022624	proteasome accessory complex	OS02T0199900-01,OS02T0199900-02,OS02T0199900-03,OS06T0607800-01	CC	0.01892	0.027613	4	39
GO:0032991	protein-containing complex	OS01T0164700-01,OS01T0205500-01,OS01T0501800-01,OS01T0737800-01,OS01T0737800-02,OS01T0744000-01,OS01T0744000-02,OS01T0754200-01,OS01T0754200-02,OS01T0754200-03,OS01T0754200-04,OS01T0932600-01,OS01T0964000-01,OS01T0964000-02,OS02T0119400-01,OS02T0197600-01,OS02T0197600-02,OS02T0197600-03,OS02T0199900-01,OS02T0199900-02,OS02T0199900-03,OS02T0633100-02,OS02T0741500-01,OS02T0803200-01,OS02T0821200-01…	CC	0.0225	0.0311538	80	2450
GO:0098797	plasma membrane protein complex	OS01T0754200-01,OS01T0754200-02,OS01T0754200-03,OS01T0754200-04	CC	0.02422	0.032697	4	42
GO:0005911	cell-cell junction	OS01T0932950-00,OS02T0174300-00,OS05T0591900-01,OS05T0591900-03,OS05T0591900-04,OS05T0591900-05,OS05T0591900-06,OS05T0591900-07,OS06T0143700-01,OS07T0537000-01,OS07T0540100-01,OS10T0556200-01,OS12T0159600-01,OS12T0159600-02	CC	0.0257	0.0326541	14	296
GO:0009506	plasmodesma	OS01T0932950-00,OS02T0174300-00,OS05T0591900-01,OS05T0591900-03,OS05T0591900-04,OS05T0591900-05,OS05T0591900-06,OS05T0591900-07,OS06T0143700-01,OS07T0537000-01,OS07T0540100-01,OS10T0556200-01,OS12T0159600-01,OS12T0159600-02	CC	0.0257	0.0326541	14	296
GO:0030054	cell junction	OS01T0932950-00,OS02T0174300-00,OS05T0591900-01,OS05T0591900-03,OS05T0591900-04,OS05T0591900-05,OS05T0591900-06,OS05T0591900-07,OS06T0143700-01,OS07T0537000-01,OS07T0540100-01,OS10T0556200-01,OS12T0159600-01,OS12T0159600-02	CC	0.0257	0.0326541	14	296
GO:0055044	symplast	OS01T0932950-00,OS02T0174300-00,OS05T0591900-01,OS05T0591900-03,OS05T0591900-04,OS05T0591900-05,OS05T0591900-06,OS05T0591900-07,OS06T0143700-01,OS07T0537000-01,OS07T0540100-01,OS10T0556200-01,OS12T0159600-01,OS12T0159600-02	CC	0.0257	0.0326541	14	296
GO:0005886	plasma membrane	OS01T0117900-01,OS01T0117900-02,OS01T0117900-03,OS01T0725400-01,OS01T0754200-01,OS01T0754200-02,OS01T0754200-03,OS01T0754200-04,OS01T0822200-01,OS02T0234450-00,OS02T0283800-01,OS03T0226300-01,OS03T0334700-01,OS04T0281900-01,OS04T0281900-02,OS04T0423700-01,OS04T0435100-01,OS04T0545600-01,OS04T0546300-01,OS04T0643600-01,OS05T0126800-01,OS06T0143700-01,OS06T0150400-01,OS06T0188000-01,OS06T0231050-00…	CC	0.02727	0.032724	47	1342
GO:0000930	gamma-tubulin complex	OS11T0362633-00,OS11T0368172-01	CC	0.03258	0.0378348	2	11
GO:0032432	actin filament bundle	OS04T0604000-01,OS04T0604000-02	CC	0.03258	0.0378348	2	11
GO:0005761	mitochondrial ribosome	OS07T0544900-01,OS10T0407100-01,OS10T0407100-02	CC	0.0366	0.041175	3	28
GO:0098791	Golgi subcompartment	OS01T0877400-01,OS02T0437800-01,OS02T0437800-02,OS03T0309000-01,OS04T0423700-01,OS05T0199500-01,OS05T0199500-02,OS09T0537600-01,OS09T0537600-02,OS10T0569300-01,OS12T0265400-00,OS12T0265600-01	CC	0.03739	0.0412053	12	254
GO:0071944	cell periphery	OS01T0117900-01,OS01T0117900-02,OS01T0117900-03,OS01T0725400-01,OS01T0754200-01,OS01T0754200-02,OS01T0754200-03,OS01T0754200-04,OS01T0822200-01,OS02T0161800-01,OS02T0234450-00,OS02T0283800-01,OS03T0226300-01,OS03T0334700-01,OS04T0281900-01,OS04T0281900-02,OS04T0423700-01,OS04T0435100-01,OS04T0545600-01,OS04T0546300-01,OS04T0604200-01,OS04T0604300-01,OS04T0643600-01,OS05T0126800-01,OS06T0143700-01…	CC	0.04117	0.0444636	57	1721
GO:0009534	chloroplast thylakoid	OS01T0118000-01,OS02T0197600-01,OS02T0197600-02,OS02T0197600-03,OS03T0856500-01,OS03T0856500-02,OS05T0508900-01,OS05T0592100-01,OS06T0107700-01,OS07T0544800-01,OS07T0558400-01,OS08T0167500-01,OS08T0167500-02	CC	0.04335	0.0454544	13	289
GO:0031976	plastid thylakoid	OS01T0118000-01,OS02T0197600-01,OS02T0197600-02,OS02T0197600-03,OS03T0856500-01,OS03T0856500-02,OS05T0508900-01,OS05T0592100-01,OS06T0107700-01,OS07T0544800-01,OS07T0558400-01,OS08T0167500-01,OS08T0167500-02	CC	0.04335	0.0454544	13	289
GO:0044459	plasma membrane part	OS01T0754200-01,OS01T0754200-02,OS01T0754200-03,OS01T0754200-04,OS04T0423700-01,OS04T0435100-01,OS04T0545600-01,OS04T0643600-01,OS06T0143700-01,OS06T0188000-01,OS12T0136900-00,OS12T0159600-01,OS12T0159600-02	CC	0.04745	0.0483453	13	293
GO:0010287	plastoglobule	OS02T0197600-01,OS02T0197600-02,OS02T0197600-03,OS07T0558400-01	CC	0.04783	0.04783	4	52

## Sheet: RSV_KEGG
#PathwayID	PathwayName	GenesName	S gene number	B gene number	Pvalue	Qvalue	PathwayLink
ko03040	Spliceosome	OS07T0623300-01|OS02T0789400-01|OS02T0789400-02|OS11T0657300-01|OS02T0759800-02|OS02T0759800-01|OS01T0956600-01|OS08T0154700-01	8	286	0.00545639	0.0401045	http://www.genome.jp/kegg-bin/show_pathway?ko03040/K12837%09red/K12621%09red/K06063%09red/K11098%09red/K12896%09red/K12891%09red
ko00500	Starch and sucrose metabolism	OS09T0457600-00|OS11T0249600-01|OS01T0897600-01|OS09T0457400-01|OS09T0457800-01|OS07T0446800-00|OS11T0249400-00	7	285	0.0115148	0.0562858	http://www.genome.jp/kegg-bin/show_pathway?ko00500/K01188%09red/K01184%09red/K01176%09red/K00844%09red
ko04626	Plant-pathogen interaction	OS01T0810300-01|OS09T0458700-01|OS02T0789100-01|OS09T0458800-00|OS06T0330100-00	5	217	0.0198863	0.0574583	http://www.genome.jp/kegg-bin/show_pathway?ko04626/K05391%09red/K13448%09red/K13457%09red/K02183%09red
ko00270	Cysteine and methionine metabolism	OS06T0242600-00|OS03T0161800-02|OS03T0161800-01|OS11T0484000-01	4	148	0.0163082	0.0574583	http://www.genome.jp/kegg-bin/show_pathway?ko00270/K08967%09red/K16054%09red/K01739%09red
ko00906	Carotenoid biosynthesis	OS11T0587000-01|OS11T0587000-02|OS09T0457100-01	3	39	0.00206185	0.0401045	http://www.genome.jp/kegg-bin/show_pathway?ko00906/K17911%09red/K09843%09red
ko00910	Nitrogen metabolism	OS09T0464000-02|OS09T0464000-01|OS03T0223400-01	3	47	0.0032472	0.0401045	http://www.genome.jp/kegg-bin/show_pathway?ko00910/K01673%09red/K01915%09red
ko03050	Proteasome	OS02T0801200-01|OS02T0801200-02|OS06T0607800-01	3	96	0.0160254	0.0574583	http://www.genome.jp/kegg-bin/show_pathway?ko03050/K03064%09red/K11599%09red
ko04070	Phosphatidylinositol signaling system	OS01T0810300-01|OS02T0787800-01|OS09T0458800-00	3	99	0.0170422	0.0574583	http://www.genome.jp/kegg-bin/show_pathway?ko04070/K00901%09red/K02183%09red
ko03008	Ribosome biogenesis in eukaryotes	OS08T0155000-01|OS08T0155000-02|OS03T0763000-01	3	119	0.0242103	0.0574583	http://www.genome.jp/kegg-bin/show_pathway?ko03008/K14561%09red/K03097%09red
ko00630	Glyoxylate and dicarboxylate metabolism	OS03T0223400-01|OS02T0170100-01|OS02T0170100-02	3	119	0.0242103	0.0574583	http://www.genome.jp/kegg-bin/show_pathway?ko00630/K02437%09red/K01915%09red
ko00480	Glutathione metabolism	OS06T0127900-01|OS02T0553200-01|OS02T0553200-02	3	120	0.024582	0.0574583	http://www.genome.jp/kegg-bin/show_pathway?ko00480/K10808%09red/K00434%09red
ko00564	Glycerophospholipid metabolism	OS05T0588100-00|OS02T0173500-01|OS02T0787800-01	3	133	0.0294796	0.0593631	http://www.genome.jp/kegg-bin/show_pathway?ko00564/K00968%09red/K06130%09red/K00901%09red
ko00940	Phenylpropanoid biosynthesis	OS01T0591300-01|OS01T0591300-02|OS01T0897600-01	3	268	0.0731371	0.0820699	http://www.genome.jp/kegg-bin/show_pathway?ko00940/K01188%09red/K12355%09red
ko04075	Plant hormone signal transduction	OS07T0580500-01|OS09T0459500-00|OS06T0614100-01	3	305	0.0405956	0.0471143	http://www.genome.jp/kegg-bin/show_pathway?ko04075/K14499%09red/K14503%09red/K14431%09red
ko00909	Sesquiterpenoid and triterpenoid biosynthesis	OS11T0189600-01|OS11T0189600-02	2	11	0.0013646	0.0401045	http://www.genome.jp/kegg-bin/show_pathway?ko00909/K19010%09red
ko04130	SNARE interactions in vesicular transport	OS01T0964000-01|OS01T0964000-02	2	46	0.0144177	0.0574583	http://www.genome.jp/kegg-bin/show_pathway?ko04130/K08516%09red
ko03022	Basal transcription factors	OS01T0846900-01|OS03T0193600-00	2	55	0.0188596	0.0574583	http://www.genome.jp/kegg-bin/show_pathway?ko03022/K03124%09red/K03126%09red
ko00053	Ascorbate and aldarate metabolism	OS02T0553200-01|OS02T0553200-02	2	59	0.0208897	0.0574583	http://www.genome.jp/kegg-bin/show_pathway?ko00053/K00434%09red
ko00380	Tryptophan metabolism	OS03T0162000-01|OS06T0613600-01	2	67	0.0250041	0.0574583	http://www.genome.jp/kegg-bin/show_pathway?ko00380/K11816%09red/K07408%09red
ko00040	Pentose and glucuronate interconversions	OS11T0249400-00|OS11T0249600-01	2	74	0.0286236	0.0592629	http://www.genome.jp/kegg-bin/show_pathway?ko00040/K01184%09red
ko03030	DNA replication	OS01T0754100-01|OS11T0484300-01	2	74	0.0286236	0.0592629	http://www.genome.jp/kegg-bin/show_pathway?ko03030/K07466%09red/K02540%09red
ko00260	Glycine, serine and threonine metabolism	OS02T0170100-01|OS02T0170100-02	2	111	0.0468798	0.0792107	http://www.genome.jp/kegg-bin/show_pathway?ko00260/K02437%09red
ko00240	Pyrimidine metabolism	OS01T0965400-01|OS06T0127900-01	2	152	0.0635298	0.0803476	http://www.genome.jp/kegg-bin/show_pathway?ko00240/K09903%09red/K10808%09red
ko00520	Amino sugar and nucleotide sugar metabolism	OS07T0446800-00|OS05T0488900-01	2	187	0.0742766	0.0827172	http://www.genome.jp/kegg-bin/show_pathway?ko00520/K00326%09red/K00844%09red
ko03013	RNA transport	OS10T0569200-01|OS01T0363900-01	2	262	0.0885258	0.0933175	http://www.genome.jp/kegg-bin/show_pathway?ko03013/K14289%09red/K03253%09red
ko01230	Biosynthesis of amino acids	OS06T0242600-00|OS03T0223400-01	2	345	0.095594	0.0975856	http://www.genome.jp/kegg-bin/show_pathway?ko01230/K01739%09red/K01915%09red
ko00440	Phosphonate and phosphinate metabolism	OS02T0173500-01	1	11	0.0155056	0.0574583	http://www.genome.jp/kegg-bin/show_pathway?ko00440/K00968%09red
ko00790	Folate biosynthesis	OS08T0556200-01	1	25	0.0305926	0.0607717	http://www.genome.jp/kegg-bin/show_pathway?ko00790/K01633%09red
ko00450	Selenocompound metabolism	OS06T0242600-00	1	26	0.0315612	0.06186	http://www.genome.jp/kegg-bin/show_pathway?ko00450/K01739%09red
ko00563	Glycosylphosphatidylinositol(GPI)-anchor biosynthesis	OS02T0140101-00	1	29	0.0343871	0.0631864	http://www.genome.jp/kegg-bin/show_pathway?ko00563/K09658%09red
ko00945	Stilbenoid, diarylheptanoid and gingerol biosynthesis	OS12T0441300-00	1	34	0.0388409	0.0695407	http://www.genome.jp/kegg-bin/show_pathway?ko00945/K16040%09red
ko00100	Steroid biosynthesis	OS02T0139700-01	1	48	0.0497723	0.0803421	http://www.genome.jp/kegg-bin/show_pathway?ko00100/K01853%09red
ko00130	Ubiquinone and other terpenoid-quinone biosynthesis	OS08T0139200-01	1	50	0.0511661	0.0803421	http://www.genome.jp/kegg-bin/show_pathway?ko00130/K03809%09red
ko00061	Fatty acid biosynthesis	OS12T0143900-01	1	51	0.0518484	0.0803421	http://www.genome.jp/kegg-bin/show_pathway?ko00061/K01897%09red
ko00920	Sulfur metabolism	OS06T0242600-00	1	51	0.0518484	0.0803421	http://www.genome.jp/kegg-bin/show_pathway?ko00920/K01739%09red
ko00220	Arginine biosynthesis	OS03T0223400-01	1	54	0.053839	0.0803421	http://www.genome.jp/kegg-bin/show_pathway?ko00220/K01915%09red
ko03410	Base excision repair	OS06T0649800-01	1	55	0.0544842	0.0803421	http://www.genome.jp/kegg-bin/show_pathway?ko03410/K01246%09red
ko04712	Circadian rhythm - plant	OS03T0763000-01	1	55	0.0544842	0.0803421	http://www.genome.jp/kegg-bin/show_pathway?ko04712/K03097%09red
ko03430	Mismatch repair	OS01T0754100-01	1	56	0.0551203	0.0803421	http://www.genome.jp/kegg-bin/show_pathway?ko03430/K07466%09red
ko00510	N-Glycan biosynthesis	OS02T0140101-00	1	57	0.0557476	0.0803421	http://www.genome.jp/kegg-bin/show_pathway?ko00510/K09658%09red
ko00410	beta-Alanine metabolism	OS03T0193400-00	1	64	0.0599007	0.0803476	http://www.genome.jp/kegg-bin/show_pathway?ko00410/K13366%09red
ko00071	Fatty acid degradation	OS12T0143900-01	1	69	0.0626271	0.0803476	http://www.genome.jp/kegg-bin/show_pathway?ko00071/K01897%09red
ko00250	Alanine, aspartate and glutamate metabolism	OS03T0223400-01	1	70	0.0631498	0.0803476	http://www.genome.jp/kegg-bin/show_pathway?ko00250/K01915%09red
ko03440	Homologous recombination	OS01T0754100-01	1	71	0.0636652	0.0803476	http://www.genome.jp/kegg-bin/show_pathway?ko03440/K07466%09red
ko00350	Tyrosine metabolism	OS11T0245100-01	1	72	0.0641734	0.0803476	http://www.genome.jp/kegg-bin/show_pathway?ko00350/K01800%09red
ko00195	Photosynthesis	OS06T0107700-01	1	73	0.0646746	0.0803476	http://www.genome.jp/kegg-bin/show_pathway?ko00195/K02641%09red
ko00052	Galactose metabolism	OS07T0446800-00	1	74	0.0651687	0.0803476	http://www.genome.jp/kegg-bin/show_pathway?ko00052/K00844%09red
ko00460	Cyanoamino acid metabolism	OS01T0897600-01	1	76	0.0661365	0.0803476	http://www.genome.jp/kegg-bin/show_pathway?ko00460/K01188%09red
ko00970	Aminoacyl-tRNA biosynthesis	OS08T0320000-01	1	87	0.0709994	0.0820699	http://www.genome.jp/kegg-bin/show_pathway?ko00970/K01866%09red
ko00330	Arginine and proline metabolism	OS03T0193400-00	1	87	0.0709994	0.0820699	http://www.genome.jp/kegg-bin/show_pathway?ko00330/K13366%09red
ko00561	Glycerolipid metabolism	OS02T0787800-01	1	89	0.0718057	0.0820699	http://www.genome.jp/kegg-bin/show_pathway?ko00561/K00901%09red
ko03420	Nucleotide excision repair	OS01T0754100-01	1	90	0.0722004	0.0820699	http://www.genome.jp/kegg-bin/show_pathway?ko03420/K07466%09red
ko00051	Fructose and mannose metabolism	OS07T0446800-00	1	92	0.0729734	0.0820699	http://www.genome.jp/kegg-bin/show_pathway?ko00051/K00844%09red
ko01212	Fatty acid metabolism	OS12T0143900-01	1	98	0.0751661	0.0828399	http://www.genome.jp/kegg-bin/show_pathway?ko01212/K01897%09red
ko04146	Peroxisome	OS12T0143900-01	1	122	0.0823011	0.0879329	http://www.genome.jp/kegg-bin/show_pathway?ko04146/K01897%09red
ko03018	RNA degradation	OS08T0154700-01	1	159	0.0895086	0.0933175	http://www.genome.jp/kegg-bin/show_pathway?ko03018/K12621%09red
ko00010	Glycolysis / Gluconeogenesis	OS07T0446800-00	1	196	0.093787	0.0966763	http://www.genome.jp/kegg-bin/show_pathway?ko00010/K00844%09red
ko00230	Purine metabolism	OS06T0127900-01	1	199	0.0940456	0.0966763	http://www.genome.jp/kegg-bin/show_pathway?ko00230/K10808%09red
ko04141	Protein processing in endoplasmic reticulum	OS09T0460200-00	1	310	0.0987707	0.0996969	http://www.genome.jp/kegg-bin/show_pathway?ko04141/K14006%09red
ko03010	Ribosome	OS03T0755700-00	1	371	0.0994853	0.0996969	http://www.genome.jp/kegg-bin/show_pathway?ko03010/K02872%09red
ko01200	Carbon metabolism	OS07T0446800-00	1	408	0.0996969	0.0996969	http://www.genome.jp/kegg-bin/show_pathway?ko01200/K00844%09red

## Sheet: RSV_GO
GO_accession	Description	GeneNames	Ontology	pValue	qValue	fg	bg
GO:0006075	(1->3)-beta-D-glucan biosynthetic process	OS01T0754200-01,OS01T0754200-02,OS01T0754200-03,OS01T0754200-04	BP	9e-05	0.01071	4	17
GO:0006074	(1->3)-beta-D-glucan metabolic process	OS01T0754200-01,OS01T0754200-02,OS01T0754200-03,OS01T0754200-04	BP	0.00011	0.006545	4	18
GO:0090502	RNA phosphodiester bond hydrolysis, endonucleolytic	OS01T0897200-01,OS01T0897200-02,OS01T0897200-04,OS01T0897300-01,OS01T0897300-02,OS08T0155000-01,OS08T0155000-02	BP	0.00018	0.00714	7	81
GO:0010018	far-red light signaling pathway	OS12T0225300-01,OS12T0225300-02,OS12T0225300-03	BP	0.00034	0.00899111	3	10
GO:0071490	cellular response to far red light	OS12T0225300-01,OS12T0225300-02,OS12T0225300-03	BP	0.00034	0.00899111	3	10
GO:0042753	positive regulation of circadian rhythm	OS12T0225300-01,OS12T0225300-02,OS12T0225300-03	BP	0.00122	0.0241967	3	15
GO:0051274	beta-glucan biosynthetic process	OS01T0754200-01,OS01T0754200-02,OS01T0754200-03,OS01T0754200-04	BP	0.00128	0.02176	4	33
GO:0090304	nucleic acid metabolic process	OS01T0109700-01,OS01T0152500-00,OS01T0193900-01,OS01T0193900-02,OS01T0298400-01,OS01T0846900-01,OS01T0897200-01,OS01T0897200-02,OS01T0897200-04,OS01T0897300-01,OS01T0897300-02,OS01T0956600-01,OS01T0965000-00,OS01T0965400-01,OS01T0965500-01,OS02T0462300-00,OS02T0462800-01,OS02T0553600-01,OS02T0759800-01,OS02T0759800-02,OS03T0169300-01,OS03T0193600-00,OS04T0414800-00,OS05T0150600-01,OS05T0150600-02…	BP	0.00167	0.0248412	72	3591
GO:0010152	pollen maturation	OS06T0607700-01,OS06T0607900-01	BP	0.00205	0.0232333	2	5
GO:0010971	positive regulation of G2/M transition of mitotic cell cycle	OS03T0197400-01,OS03T0197400-02	BP	0.00205	0.0232333	2	5
GO:0019464	glycine decarboxylation via glycine cleavage system	OS02T0170100-01,OS02T0170100-02	BP	0.00205	0.0232333	2	5
GO:1902751	positive regulation of cell cycle G2/M phase transition	OS03T0197400-01,OS03T0197400-02	BP	0.00205	0.0232333	2	5
GO:0007602	phototransduction	OS12T0225300-01,OS12T0225300-02,OS12T0225300-03	BP	0.00248	0.02108	3	19
GO:0009583	detection of light stimulus	OS12T0225300-01,OS12T0225300-02,OS12T0225300-03	BP	0.00248	0.02108	3	19
GO:0009585	red, far-red light phototransduction	OS12T0225300-01,OS12T0225300-02,OS12T0225300-03	BP	0.00248	0.02108	3	19
GO:0090501	RNA phosphodiester bond hydrolysis	OS01T0897200-01,OS01T0897200-02,OS01T0897200-04,OS01T0897300-01,OS01T0897300-02,OS08T0155000-01,OS08T0155000-02	BP	0.00281	0.0208994	7	129
GO:0048447	sepal morphogenesis	OS02T0689800-01,OS06T0127800-01,OS12T0263100-01	BP	0.00289	0.0191061	3	20
GO:0048451	petal formation	OS02T0689800-01,OS06T0127800-01,OS12T0263100-01	BP	0.00289	0.0191061	3	20
GO:0048453	sepal formation	OS02T0689800-01,OS06T0127800-01,OS12T0263100-01	BP	0.00289	0.0191061	3	20
GO:0000350	generation of catalytic spliceosome for second transesterification step	OS02T0759800-01,OS02T0759800-02	BP	0.00304	0.018088	2	6
GO:0048446	petal morphogenesis	OS02T0689800-01,OS06T0127800-01,OS12T0263100-01	BP	0.00333	0.01887	3	21
GO:0048442	sepal development	OS02T0689800-01,OS06T0127800-01,OS12T0263100-01	BP	0.00382	0.0202036	3	22
GO:0048464	flower calyx development	OS02T0689800-01,OS06T0127800-01,OS12T0263100-01	BP	0.00382	0.0202036	3	22
GO:0048441	petal development	OS02T0689800-01,OS06T0127800-01,OS12T0263100-01	BP	0.00491	0.0238486	3	24
GO:0048465	corolla development	OS02T0689800-01,OS06T0127800-01,OS12T0263100-01	BP	0.00491	0.0238486	3	24
GO:0009396	folic acid-containing compound biosynthetic process	OS05T0150800-01,OS05T0150800-02,OS08T0556200-01	BP	0.00552	0.0243289	3	25
GO:0009582	detection of abiotic stimulus	OS12T0225300-01,OS12T0225300-02,OS12T0225300-03	BP	0.00552	0.0243289	3	25
GO:0042752	regulation of circadian rhythm	OS12T0225300-01,OS12T0225300-02,OS12T0225300-03	BP	0.00552	0.0243289	3	25
GO:0048449	floral organ formation	OS02T0689800-01,OS05T0154500-01,OS06T0127800-01,OS12T0263100-01	BP	0.00554	0.0227331	4	49
GO:0090305	nucleic acid phosphodiester bond hydrolysis	OS01T0897200-01,OS01T0897200-02,OS01T0897200-04,OS01T0897300-01,OS01T0897300-02,OS02T0462300-00,OS03T0169300-01,OS04T0414800-00,OS06T0231100-00,OS06T0231400-01,OS08T0155000-01,OS08T0155000-02,OS08T0555800-00,OS09T0573000-01,OS11T0256100-00,OS11T0483950-00,OS11T0587100-00,OS12T0490100-01	BP	0.00592	0.0234827	18	640
GO:0010017	red or far-red light signaling pathway	OS12T0225300-01,OS12T0225300-02,OS12T0225300-03	BP	0.00617	0.0233089	3	26
GO:0071489	cellular response to red or far red light	OS12T0225300-01,OS12T0225300-02,OS12T0225300-03	BP	0.00617	0.0233089	3	26
GO:0048444	floral organ morphogenesis	OS02T0689800-01,OS05T0154500-01,OS06T0127800-01,OS12T0263100-01	BP	0.00685	0.0247015	4	52
GO:0000393	spliceosomal conformational changes to generate catalytic conformation	OS02T0759800-01,OS02T0759800-02	BP	0.00709	0.0244554	2	9
GO:0015976	carbon utilization	OS09T0464000-01,OS09T0464000-02	BP	0.00709	0.0244554	2	9
GO:0009581	detection of external stimulus	OS12T0225300-01,OS12T0225300-02,OS12T0225300-03	BP	0.00761	0.0251553	3	28
GO:0042559	pteridine-containing compound biosynthetic process	OS05T0150800-01,OS05T0150800-02,OS08T0556200-01	BP	0.0084	0.0270162	3	29
GO:0006546	glycine catabolic process	OS02T0170100-01,OS02T0170100-02	BP	0.00878	0.0271382	2	10
GO:0042135	neurotransmitter catabolic process	OS02T0170100-01,OS02T0170100-02	BP	0.00878	0.0271382	2	10
GO:0006725	cellular aromatic compound metabolic process	OS01T0109700-01,OS01T0152500-00,OS01T0193900-01,OS01T0193900-02,OS01T0298400-01,OS01T0846900-01,OS01T0897200-01,OS01T0897200-02,OS01T0897200-04,OS01T0897300-01,OS01T0897300-02,OS01T0956600-01,OS01T0965000-00,OS01T0965400-01,OS01T0965500-01,OS02T0462300-00,OS02T0462800-01,OS02T0553600-01,OS02T0689900-01,OS02T0759800-01,OS02T0759800-02,OS03T0169300-01,OS03T0193600-00,OS04T0414800-00,OS05T0150600-01…	BP	0.00889	0.0264477	81	4403
GO:0048438	floral whorl development	OS01T0965400-01,OS02T0170200-01,OS02T0689800-01,OS06T0127800-01,OS07T0158300-01,OS12T0263100-01	BP	0.00922	0.0267605	6	123
GO:0009071	serine family amino acid catabolic process	OS02T0170100-01,OS02T0170100-02	BP	0.01063	0.029764	2	11
GO:0080156	mitochondrial mRNA modification	OS08T0139000-01,OS08T0139000-02	BP	0.01063	0.029764	2	11
GO:0016070	RNA metabolic process	OS01T0109700-01,OS01T0152500-00,OS01T0193900-01,OS01T0193900-02,OS01T0298400-01,OS01T0846900-01,OS01T0897200-01,OS01T0897200-02,OS01T0897200-04,OS01T0897300-01,OS01T0897300-02,OS01T0956600-01,OS01T0965000-00,OS01T0965400-01,OS02T0462800-01,OS02T0553600-01,OS02T0759800-01,OS02T0759800-02,OS03T0169300-01,OS03T0193600-00,OS04T0414800-00,OS05T0488600-01,OS05T0551900-00,OS06T0107800-01,OS06T0108500-01…	BP	0.01093	0.0295607	61	3176
GO:0070897	transcription preinitiation complex assembly	OS01T0846900-01,OS03T0193600-00,OS06T0607800-01	BP	0.01105	0.0292211	3	32
GO:0051273	beta-glucan metabolic process	OS01T0754200-01,OS01T0754200-02,OS01T0754200-03,OS01T0754200-04	BP	0.01127	0.029155	4	60
GO:0048646	anatomical structure formation involved in morphogenesis	OS02T0689800-01,OS05T0154500-01,OS06T0127800-01,OS06T0607700-01,OS12T0263100-01	BP	0.01152	0.0291677	5	93
GO:0055074	calcium ion homeostasis	OS09T0458800-00,OS09T0458900-01	BP	0.01263	0.0306729	2	12
GO:1901989	positive regulation of cell cycle phase transition	OS03T0197400-01,OS03T0197400-02	BP	0.01263	0.0306729	2	12
GO:1901992	positive regulation of mitotic cell cycle phase transition	OS03T0197400-01,OS03T0197400-02	BP	0.01263	0.0306729	2	12
GO:0009658	chloroplast organization	OS01T0965400-01,OS08T0139100-01,OS08T0515800-01,OS09T0458000-00,OS09T0458400-01,OS09T0458400-02,OS11T0657100-01	BP	0.01267	0.0295633	7	171
GO:0045893	positive regulation of transcription, DNA-templated	OS02T0553600-01,OS06T0108500-01,OS06T0607800-01,OS07T0623100-01,OS12T0225300-01,OS12T0225300-02,OS12T0225300-03	BP	0.01305	0.0293009	7	172
GO:1902680	positive regulation of RNA biosynthetic process	OS02T0553600-01,OS06T0108500-01,OS06T0607800-01,OS07T0623100-01,OS12T0225300-01,OS12T0225300-02,OS12T0225300-03	BP	0.01305	0.0293009	7	172
GO:1903508	positive regulation of nucleic acid-templated transcription	OS02T0553600-01,OS06T0108500-01,OS06T0607800-01,OS07T0623100-01,OS12T0225300-01,OS12T0225300-02,OS12T0225300-03	BP	0.01305	0.0293009	7	172
GO:1905393	plant organ formation	OS02T0689800-01,OS05T0154500-01,OS06T0127800-01,OS12T0263100-01	BP	0.01331	0.028798	4	63
GO:0007051	spindle organization	OS05T0154500-01,OS08T0555800-00,OS11T0189900-00	BP	0.01412	0.030005	3	35
GO:1901360	organic cyclic compound metabolic process	OS01T0109700-01,OS01T0152500-00,OS01T0193900-01,OS01T0193900-02,OS01T0298400-01,OS01T0846900-01,OS01T0897200-01,OS01T0897200-02,OS01T0897200-04,OS01T0897300-01,OS01T0897300-02,OS01T0956600-01,OS01T0965000-00,OS01T0965400-01,OS01T0965500-01,OS02T0462300-00,OS02T0462800-01,OS02T0553600-01,OS02T0689900-01,OS02T0759800-01,OS02T0759800-02,OS03T0169300-01,OS03T0193600-00,OS04T0414800-00,OS05T0150600-01…	BP	0.01454	0.0303554	81	4489
GO:0045931	positive regulation of mitotic cell cycle	OS03T0197400-01,OS03T0197400-02	BP	0.01479	0.030345	2	13
GO:0090697	post-embryonic plant organ morphogenesis	OS02T0689800-01,OS05T0154500-01,OS06T0127800-01,OS12T0263100-01	BP	0.0148	0.0298508	4	65
GO:0042398	cellular modified amino acid biosynthetic process	OS05T0150800-01,OS05T0150800-02,OS08T0556200-01	BP	0.01524	0.030226	3	36
GO:0046483	heterocycle metabolic process	OS01T0109700-01,OS01T0152500-00,OS01T0193900-01,OS01T0193900-02,OS01T0298400-01,OS01T0846900-01,OS01T0897200-01,OS01T0897200-02,OS01T0897200-04,OS01T0897300-01,OS01T0897300-02,OS01T0956600-01,OS01T0965000-00,OS01T0965400-01,OS01T0965500-01,OS02T0462300-00,OS02T0462800-01,OS02T0553600-01,OS02T0759800-01,OS02T0759800-02,OS03T0169300-01,OS03T0193600-00,OS04T0414800-00,OS05T0150600-01,OS05T0150600-02…	BP	0.01571	0.0306474	78	4310
GO:0006760	folic acid-containing compound metabolic process	OS05T0150800-01,OS05T0150800-02,OS08T0556200-01	BP	0.0189	0.0362758	3	39
GO:0000338	protein deneddylation	OS03T0197400-01,OS03T0197400-02	BP	0.01953	0.0360321	2	15
GO:0031627	telomeric loop formation	OS11T0160700-01,OS11T0160700-02	BP	0.01953	0.0360321	2	15
GO:0035725	sodium ion transmembrane transport	OS09T0458800-00,OS09T0458900-01	BP	0.01953	0.0360321	2	15
GO:1900864	mitochondrial RNA modification	OS08T0139000-01,OS08T0139000-02	BP	0.01953	0.0360321	2	15
GO:0051254	positive regulation of RNA metabolic process	OS02T0553600-01,OS06T0108500-01,OS06T0607800-01,OS07T0623100-01,OS12T0225300-01,OS12T0225300-02,OS12T0225300-03	BP	0.01976	0.0350961	7	187
GO:0006139	nucleobase-containing compound metabolic process	OS01T0109700-01,OS01T0152500-00,OS01T0193900-01,OS01T0193900-02,OS01T0298400-01,OS01T0846900-01,OS01T0897200-01,OS01T0897200-02,OS01T0897200-04,OS01T0897300-01,OS01T0897300-02,OS01T0956600-01,OS01T0965000-00,OS01T0965400-01,OS01T0965500-01,OS02T0462300-00,OS02T0462800-01,OS02T0553600-01,OS02T0759800-01,OS02T0759800-02,OS03T0169300-01,OS03T0193600-00,OS04T0414800-00,OS05T0150600-01,OS05T0150600-02…	BP	0.01995	0.0349125	74	4097
GO:0007623	circadian rhythm	OS12T0225300-01,OS12T0225300-02,OS12T0225300-03	BP	0.02159	0.0369671	3	41
GO:0048511	rhythmic process	OS12T0225300-01,OS12T0225300-02,OS12T0225300-03	BP	0.02159	0.0369671	3	41
GO:0090696	post-embryonic plant organ development	OS02T0689800-01,OS05T0154500-01,OS06T0127800-01,OS12T0263100-01	BP	0.02175	0.0364542	4	73
GO:0051225	spindle assembly	OS05T0154500-01,OS11T0189900-00	BP	0.02211	0.0365429	2	16
GO:0045935	positive regulation of nucleobase-containing compound metabolic process	OS02T0553600-01,OS06T0108500-01,OS06T0607800-01,OS07T0623100-01,OS12T0225300-01,OS12T0225300-02,OS12T0225300-03	BP	0.02359	0.0384549	7	194
GO:0009555	pollen development	OS01T0965500-01,OS06T0607700-01,OS06T0607900-01,OS08T0555800-00	BP	0.02376	0.0382086	4	75
GO:0042558	pteridine-containing compound metabolic process	OS05T0150800-01,OS05T0150800-02,OS08T0556200-01	BP	0.02447	0.0388257	3	43
GO:0030001	metal ion transport	OS01T0933200-00,OS01T0964900-00,OS02T0789100-01,OS07T0623200-01,OS07T0623200-02,OS07T0623200-03,OS08T0130000-00,OS09T0458800-00,OS09T0458900-01	BP	0.02491	0.0390038	9	287
GO:0010557	positive regulation of macromolecule biosynthetic process	OS02T0553600-01,OS06T0108500-01,OS06T0607800-01,OS07T0623100-01,OS12T0225300-01,OS12T0225300-02,OS12T0225300-03	BP	0.02538	0.0392236	7	197
GO:0098771	inorganic ion homeostasis	OS01T0933200-00,OS02T0689900-01,OS07T0623200-01,OS07T0623200-02,OS07T0623200-03,OS09T0458800-00,OS09T0458900-01	BP	0.02726	0.041589	7	200
GO:0030641	regulation of cellular pH	OS07T0623200-01,OS07T0623200-02,OS07T0623200-03	BP	0.02755	0.0412384	3	45
GO:0051453	regulation of intracellular pH	OS07T0623200-01,OS07T0623200-02,OS07T0623200-03	BP	0.02755	0.0412384	3	45
GO:0048437	floral organ development	OS01T0965400-01,OS02T0689800-01,OS05T0154500-01,OS06T0127800-01,OS07T0158300-01,OS12T0263100-01	BP	0.02815	0.0413562	6	158
GO:0010218	response to far red light	OS12T0225300-01,OS12T0225300-02,OS12T0225300-03	BP	0.02916	0.0420611	3	46
GO:0030004	cellular monovalent inorganic cation homeostasis	OS07T0623200-01,OS07T0623200-02,OS07T0623200-03	BP	0.02916	0.0420611	3	46
GO:0031334	positive regulation of protein complex assembly	OS02T0553600-01,OS02T0689800-01,OS05T0154500-01,OS06T0607800-01	BP	0.03163	0.0448092	4	82
GO:0006367	transcription initiation from RNA polymerase II promoter	OS01T0846900-01,OS02T0553600-01,OS06T0607800-01	BP	0.03254	0.045556	3	48
GO:0031328	positive regulation of cellular biosynthetic process	OS02T0553600-01,OS06T0108500-01,OS06T0607800-01,OS07T0623100-01,OS12T0225300-01,OS12T0225300-02,OS12T0225300-03	BP	0.03274	0.045303	7	208
GO:0044089	positive regulation of cellular component biogenesis	OS02T0553600-01,OS02T0689800-01,OS05T0154500-01,OS06T0607800-01	BP	0.03287	0.0449601	4	83
GO:0048522	positive regulation of cellular process	OS02T0553600-01,OS02T0689800-01,OS03T0197400-01,OS03T0197400-02,OS03T0431800-00,OS05T0154500-01,OS06T0108500-01,OS06T0607800-01,OS07T0623100-01,OS12T0225300-01,OS12T0225300-02,OS12T0225300-03	BP	0.03323	0.044936	12	452
GO:0034641	cellular nitrogen compound metabolic process	OS01T0109700-01,OS01T0152500-00,OS01T0160800-01,OS01T0193900-01,OS01T0193900-02,OS01T0298400-01,OS01T0846900-01,OS01T0897200-01,OS01T0897200-02,OS01T0897200-04,OS01T0897300-01,OS01T0897300-02,OS01T0956600-01,OS01T0965000-00,OS01T0965400-01,OS01T0965500-01,OS02T0462300-00,OS02T0462800-01,OS02T0553600-01,OS02T0689900-01,OS02T0759800-01,OS02T0759800-02,OS03T0169300-01,OS03T0169400-01,OS03T0193600-00…	BP	0.03453	0.0461693	84	4854
GO:0010628	positive regulation of gene expression	OS02T0553600-01,OS06T0108500-01,OS06T0607800-01,OS07T0623100-01,OS12T0225300-01,OS12T0225300-02,OS12T0225300-03	BP	0.03497	0.0462381	7	211
GO:0007215	glutamate receptor signaling pathway	OS02T0787600-01,OS02T0787600-02	BP	0.0369	0.0477293	2	21
GO:0035235	ionotropic glutamate receptor signaling pathway	OS02T0787600-01,OS02T0787600-02	BP	0.0369	0.0477293	2	21
GO:0090068	positive regulation of cell cycle process	OS03T0197400-01,OS03T0197400-02	BP	0.0369	0.0477293	2	21
GO:0006352	DNA-templated transcription, initiation	OS01T0846900-01,OS02T0553600-01,OS03T0193600-00,OS06T0607800-01	BP	0.03947	0.0499673	4	88
GO:0071482	cellular response to light stimulus	OS12T0225300-01,OS12T0225300-02,OS12T0225300-03	BP	0.03987	0.0499424	3	52
GO:0000478	endonucleolytic cleavage involved in rRNA processing	OS08T0155000-01,OS08T0155000-02	BP	0.04021	0.0488264	2	22
GO:0006544	glycine metabolic process	OS02T0170100-01,OS02T0170100-02	BP	0.04021	0.0488264	2	22
GO:0060260	regulation of transcription initiation from RNA polymerase II promoter	OS02T0553600-01,OS06T0607800-01	BP	0.04021	0.0488264	2	22
GO:0060261	positive regulation of transcription initiation from RNA polymerase II promoter	OS02T0553600-01,OS06T0607800-01	BP	0.04021	0.0488264	2	22
GO:2000144	positive regulation of DNA-templated transcription, initiation	OS02T0553600-01,OS06T0607800-01	BP	0.04021	0.0488264	2	22
GO:0009891	positive regulation of biosynthetic process	OS02T0553600-01,OS06T0108500-01,OS06T0607800-01,OS07T0623100-01,OS12T0225300-01,OS12T0225300-02,OS12T0225300-03	BP	0.04141	0.04879	7	219
GO:0071478	cellular response to radiation	OS12T0225300-01,OS12T0225300-02,OS12T0225300-03	BP	0.04183	0.0488017	3	53
GO:0000212	meiotic spindle organization	OS08T0555800-00	BP	0.04301	0.0485136	1	3
GO:0006598	polyamine catabolic process	OS02T0689900-01	BP	0.04301	0.0485136	1	3
GO:0009186	deoxyribonucleoside diphosphate metabolic process	OS06T0127900-01	BP	0.04301	0.0485136	1	3
GO:0070476	rRNA (guanine-N7)-methylation	OS07T0623000-01	BP	0.04301	0.0485136	1	3
GO:0070734	histone H3-K27 methylation	OS01T0965500-01	BP	0.04301	0.0485136	1	3
GO:0072583	clathrin-dependent endocytosis	OS06T0731800-01	BP	0.04301	0.0485136	1	3
GO:0006814	sodium ion transport	OS09T0458800-00,OS09T0458900-01	BP	0.04363	0.0474153	2	23
GO:0051123	RNA polymerase II preinitiation complex assembly	OS01T0846900-01,OS06T0607800-01	BP	0.04363	0.0474153	2	23
GO:0022607	cellular component assembly	OS01T0846900-01,OS01T0956600-01,OS02T0553600-01,OS02T0689800-01,OS02T0759800-01,OS02T0759800-02,OS02T0801200-01,OS02T0801200-02,OS03T0193600-00,OS05T0154500-01,OS06T0607700-01,OS06T0607800-01,OS08T0515800-01,OS08T0555800-00,OS10T0569200-01,OS11T0189900-00,OS11T0657300-01	BP	0.04541	0.0486828	17	746
GO:0001505	regulation of neurotransmitter levels	OS02T0170100-01,OS02T0170100-02	BP	0.04715	0.0490031	2	24
GO:0009310	amine catabolic process	OS02T0689900-01,OS08T0319900-01	BP	0.04715	0.0490031	2	24
GO:0042133	neurotransmitter metabolic process	OS02T0170100-01,OS02T0170100-02	BP	0.04715	0.0490031	2	24
GO:0042402	cellular biogenic amine catabolic process	OS02T0689900-01,OS08T0319900-01	BP	0.04715	0.0490031	2	24
GO:0072507	divalent inorganic cation homeostasis	OS09T0458800-00,OS09T0458900-01	BP	0.04715	0.0490031	2	24
GO:2000142	regulation of DNA-templated transcription, initiation	OS02T0553600-01,OS06T0607800-01	BP	0.04715	0.0490031	2	24
GO:0044085	cellular component biogenesis	OS01T0846900-01,OS01T0956600-01,OS02T0553600-01,OS02T0689800-01,OS02T0759800-01,OS02T0759800-02,OS02T0801200-01,OS02T0801200-02,OS03T0193600-00,OS05T0154500-01,OS05T0488500-01,OS06T0607700-01,OS06T0607800-01,OS07T0158300-01,OS07T0623000-01,OS08T0155000-01,OS08T0155000-02,OS08T0515800-01,OS08T0555800-00,OS09T0458100-01,OS10T0569200-01,OS11T0189900-00,OS11T0657300-01	BP	0.04742	0.0478219	23	1092
GO:0055080	cation homeostasis	OS01T0933200-00,OS02T0689900-01,OS07T0623200-01,OS07T0623200-02,OS07T0623200-03,OS09T0458800-00,OS09T0458900-01	BP	0.04857	0.04857	7	227
GO:0033897	ribonuclease T2 activity	OS01T0897200-01,OS01T0897200-02,OS01T0897200-04,OS01T0897300-01,OS01T0897300-02	MF	1e-06	5.5e-05	5	13
GO:0016892	endoribonuclease activity, producing 3'-phosphomonoesters	OS01T0897200-01,OS01T0897200-02,OS01T0897200-04,OS01T0897300-01,OS01T0897300-02	MF	6.3e-06	0.0001386	5	18
GO:0016894	endonuclease activity, active with either ribo- or deoxyribonucleic acids and producing 3'-phosphomonoesters	OS01T0897200-01,OS01T0897200-02,OS01T0897200-04,OS01T0897300-01,OS01T0897300-02	MF	6.3e-06	0.0001386	5	18
GO:0003843	1,3-beta-D-glucan synthase activity	OS01T0754200-01,OS01T0754200-02,OS01T0754200-03,OS01T0754200-04	MF	0.00012	0.00165	4	17
GO:0003712	transcription coregulator activity	OS02T0553600-01,OS02T0759800-01,OS02T0759800-02,OS09T0573200-01,OS09T0573200-02,OS09T0573200-03	MF	0.0002	0.0022	6	55
GO:0004521	endoribonuclease activity	OS01T0897200-01,OS01T0897200-02,OS01T0897200-04,OS01T0897300-01,OS01T0897300-02	MF	0.00095	0.00870833	5	49
GO:0003714	transcription corepressor activity	OS09T0573200-01,OS09T0573200-02,OS09T0573200-03	MF	0.00119	0.00935	3	14
GO:0019784	NEDD8-specific protease activity	OS03T0197400-01,OS03T0197400-02	MF	0.00141	0.00912353	2	4
GO:0042134	rRNA primary transcript binding	OS08T0155000-01,OS08T0155000-02	MF	0.00141	0.00912353	2	4
GO:0004519	endonuclease activity	OS01T0897200-01,OS01T0897200-02,OS01T0897200-04,OS01T0897300-01,OS01T0897300-02,OS03T0169300-01,OS04T0414800-00,OS06T0231100-00,OS06T0231400-01,OS06T0613400-01,OS07T0158200-01,OS09T0573000-01,OS11T0256100-00,OS11T0483950-00,OS11T0587100-00,OS12T0490100-01	MF	0.00306	0.01683	16	473
GO:0004477	methenyltetrahydrofolate cyclohydrolase activity	OS05T0150800-01,OS05T0150800-02	MF	0.00346	0.0165478	2	6
GO:0004488	methylenetetrahydrofolate dehydrogenase (NADP+) activity	OS05T0150800-01,OS05T0150800-02	MF	0.00346	0.0165478	2	6
GO:0008553	proton-exporting ATPase activity, phosphorylative mechanism	OS07T0623200-01,OS07T0623200-02,OS07T0623200-03	MF	0.004	0.0169231	3	21
GO:0005432	calcium:sodium antiporter activity	OS09T0458800-00,OS09T0458900-01	MF	0.00479	0.0175633	2	7
GO:0015368	calcium:cation antiporter activity	OS09T0458800-00,OS09T0458900-01	MF	0.00479	0.0175633	2	7
GO:0043140	ATP-dependent 3'-5' DNA helicase activity	OS05T0150600-01,OS05T0150600-02	MF	0.00479	0.0175633	2	7
GO:0004518	nuclease activity	OS01T0897200-01,OS01T0897200-02,OS01T0897200-04,OS01T0897300-01,OS01T0897300-02,OS02T0462300-00,OS03T0169300-01,OS04T0414800-00,OS06T0231100-00,OS06T0231400-01,OS06T0613400-01,OS07T0158200-01,OS09T0573000-01,OS11T0256100-00,OS11T0483950-00,OS11T0587100-00,OS12T0490100-01	MF	0.00537	0.0173735	17	547
GO:0004540	ribonuclease activity	OS01T0897200-01,OS01T0897200-02,OS01T0897200-04,OS01T0897300-01,OS01T0897300-02	MF	0.00553	0.0168972	5	73
GO:0017025	TBP-class protein binding	OS01T0846900-01,OS03T0193600-00,OS06T0607800-01	MF	0.00588	0.0170211	3	24
GO:0009378	four-way junction helicase activity	OS05T0150600-01,OS05T0150600-02	MF	0.00632	0.01738	2	8
GO:0003756	protein disulfide isomerase activity	OS09T0458400-01,OS09T0458400-02	MF	0.00995	0.0254535	2	10
GO:0016864	intramolecular oxidoreductase activity, transposing S-S bonds	OS09T0458400-01,OS09T0458400-02	MF	0.00995	0.0254535	2	10
GO:0003723	RNA binding	OS01T0846900-01,OS01T0897200-01,OS01T0897200-02,OS01T0897200-04,OS01T0897300-01,OS01T0897300-02,OS01T0956600-01,OS03T0169300-01,OS03T0169400-01,OS03T0193600-00,OS04T0414800-00,OS05T0488500-01,OS05T0551900-00,OS06T0231100-00,OS06T0231400-01,OS07T0158300-01,OS07T0623300-01,OS08T0154700-01,OS08T0155000-01,OS08T0155000-02,OS08T0515800-01,OS08T0556000-01,OS08T0556000-02,OS09T0573000-01,OS10T0569200-01…	MF	0.01061	0.0253717	32	1347
GO:0016866	intramolecular transferase activity	OS02T0139700-01,OS02T0140200-01,OS11T0189600-01,OS11T0189600-02	MF	0.01179	0.0270188	4	57
GO:0043138	3'-5' DNA helicase activity	OS05T0150600-01,OS05T0150600-02	MF	0.0143	0.03146	2	12
GO:0140110	transcription regulator activity	OS01T0298400-01,OS02T0462800-01,OS02T0553600-01,OS02T0759800-01,OS02T0759800-02,OS06T0108500-01,OS06T0127800-01,OS06T0614100-01,OS07T0158500-00,OS07T0623100-01,OS09T0457900-01,OS09T0573200-01,OS09T0573200-02,OS09T0573200-03,OS12T0116600-01,OS12T0116700-01,OS12T0225300-01,OS12T0225300-02,OS12T0225300-03	MF	0.01463	0.0309481	19	707
GO:0008270	zinc ion binding	OS01T0152500-00,OS01T0690333-00,OS01T0965500-01,OS02T0743700-01,OS02T0743700-02,OS02T0743700-03,OS05T0154600-01,OS05T0154600-02,OS05T0359500-00,OS05T0488800-01,OS06T0231400-01,OS08T0135400-01,OS09T0128600-01,OS09T0128600-02,OS09T0128600-04,OS09T0459800-01,OS09T0459800-02,OS09T0459800-03,OS09T0459800-04,OS09T0460200-00,OS09T0464000-01,OS09T0464000-02,OS09T0573000-01,OS11T0244900-00,OS11T0256300-01…	MF	0.01524	0.0310444	29	1224
GO:0019238	cyclohydrolase activity	OS05T0150800-01,OS05T0150800-02	MF	0.01673	0.0328625	2	13
GO:0004089	carbonate dehydratase activity	OS09T0464000-01,OS09T0464000-02	MF	0.01932	0.0366414	2	14
GO:0003691	double-stranded telomeric DNA binding	OS11T0160700-01,OS11T0160700-02	MF	0.02207	0.0404617	2	15
GO:0015081	sodium ion transmembrane transporter activity	OS09T0458800-00,OS09T0458900-01	MF	0.02497	0.0435984	2	16
GO:0043621	protein self-association	OS09T0458400-01,OS09T0458400-02	MF	0.02497	0.0435984	2	16
GO:0015662	ATPase activity, coupled to transmembrane movement of ions, phosphorylative mechanism	OS07T0623200-01,OS07T0623200-02,OS07T0623200-03	MF	0.02557	0.0426167	3	41
GO:0140097	catalytic activity, acting on DNA	OS05T0150600-01,OS05T0150600-02,OS06T0613400-01,OS06T0649800-01,OS07T0158200-01,OS08T0154600-01	MF	0.02654	0.0429324	6	146
GO:0036442	proton-exporting ATPase activity	OS07T0623200-01,OS07T0623200-02,OS07T0623200-03	MF	0.03442	0.0540886	3	46
GO:0004520	endodeoxyribonuclease activity	OS06T0613400-01,OS07T0158200-01	MF	0.03452	0.0527389	2	19
GO:0004364	glutathione transferase activity	OS09T0317700-01,OS10T0368100-01,OS10T0543800-00,OS11T0245100-01	MF	0.03589	0.05335	4	80
GO:0016853	isomerase activity	OS02T0139700-01,OS02T0140200-01,OS08T0154600-01,OS09T0458400-01,OS09T0458400-02,OS11T0189600-01,OS11T0189600-02,OS11T0245100-01	MF	0.0379	0.0548553	8	245
GO:0004029	aldehyde dehydrogenase (NAD) activity	OS01T0591300-01,OS01T0591300-02	MF	0.03797	0.0528696	2	20
GO:0016646	oxidoreductase activity, acting on the CH-NH group of donors, NAD or NADP as acceptor	OS05T0150800-01,OS05T0150800-02	MF	0.03797	0.0528696	2	20
GO:0004970	ionotropic glutamate receptor activity	OS02T0787600-01,OS02T0787600-02	MF	0.04154	0.051925	2	21
GO:0005230	extracellular ligand-gated ion channel activity	OS02T0787600-01,OS02T0787600-02	MF	0.04154	0.051925	2	21
GO:0008066	glutamate receptor activity	OS02T0787600-01,OS02T0787600-02	MF	0.04154	0.051925	2	21
GO:0022824	transmitter-gated ion channel activity	OS02T0787600-01,OS02T0787600-02	MF	0.04154	0.051925	2	21
GO:0022835	transmitter-gated channel activity	OS02T0787600-01,OS02T0787600-02	MF	0.04154	0.051925	2	21
GO:0030594	neurotransmitter receptor activity	OS02T0787600-01,OS02T0787600-02	MF	0.04154	0.051925	2	21
GO:0042162	telomeric DNA binding	OS11T0160700-01,OS11T0160700-02	MF	0.04154	0.051925	2	21
GO:0004150	dihydroneopterin aldolase activity	OS08T0556200-01	MF	0.04586	0.050446	1	3
GO:0032050	clathrin heavy chain binding	OS06T0731800-01	MF	0.04586	0.050446	1	3
GO:0043874	acireductone synthase activity	OS11T0484000-01	MF	0.04586	0.050446	1	3
GO:0102083	7,8-dihydromonapterin aldolase activity	OS08T0556200-01	MF	0.04586	0.050446	1	3
GO:1901474	azole transmembrane transporter activity	OS11T0423800-01	MF	0.04586	0.050446	1	3
GO:0015318	inorganic molecular entity transmembrane transporter activity	OS01T0597400-00,OS01T0597600-01,OS02T0689900-01,OS02T0787600-01,OS02T0787600-02,OS02T0789100-01,OS03T0197200-01,OS07T0623200-01,OS07T0623200-02,OS07T0623200-03,OS08T0130000-00,OS09T0458800-00,OS09T0458900-01,OS11T0423800-01	MF	0.04697	0.0487425	14	547
GO:0015276	ligand-gated ion channel activity	OS02T0787600-01,OS02T0787600-02	MF	0.04905	0.0495	2	23
GO:0022834	ligand-gated channel activity	OS02T0787600-01,OS02T0787600-02	MF	0.04905	0.0495	2	23
GO:0000148	1,3-beta-D-glucan synthase complex	OS01T0754200-01,OS01T0754200-02,OS01T0754200-03,OS01T0754200-04	CC	5.8e-05	0.001798	4	17
GO:0098797	plasma membrane protein complex	OS01T0754200-01,OS01T0754200-02,OS01T0754200-03,OS01T0754200-04,OS06T0731800-01	CC	0.0002	0.0031	5	42
GO:0071141	SMAD protein complex	OS02T0759800-01,OS02T0759800-02	CC	0.0005	0.00516667	2	3
GO:0034457	Mpp10 complex	OS08T0155000-01,OS08T0155000-02	CC	0.00099	0.0076725	2	4
GO:0005960	glycine cleavage complex	OS02T0170100-01,OS02T0170100-02	CC	0.00164	0.00924364	2	5
GO:0016363	nuclear matrix	OS08T0155000-01,OS08T0155000-02	CC	0.00164	0.00924364	2	5
GO:0015030	Cajal body	OS08T0155000-01,OS08T0155000-02	CC	0.00447	0.0197957	2	8
GO:0017053	transcriptional repressor complex	OS01T0193900-01,OS01T0193900-02	CC	0.00569	0.0220487	2	9
GO:0016604	nuclear body	OS01T0956600-01,OS08T0155000-01,OS08T0155000-02	CC	0.00677	0.0233189	3	30
GO:0000782	telomere cap complex	OS11T0160700-01,OS11T0160700-02	CC	0.00706	0.0198964	2	10
GO:0000783	nuclear telomere cap complex	OS11T0160700-01,OS11T0160700-02	CC	0.00706	0.0198964	2	10
GO:0034399	nuclear periphery	OS08T0155000-01,OS08T0155000-02	CC	0.00706	0.0198964	2	10
GO:0005694	chromosome	OS01T0109700-01,OS01T0152700-01,OS02T0689800-01,OS05T0150600-01,OS05T0150600-02,OS08T0154600-01,OS11T0160700-01,OS11T0160700-02,OS11T0657200-01	CC	0.00929	0.0221531	9	272
GO:0071013	catalytic step 2 spliceosome	OS02T0759800-01,OS02T0759800-02,OS08T0154700-01	CC	0.01603	0.035495	3	41
GO:0044454	nuclear chromosome part	OS02T0689800-01,OS08T0154600-01,OS11T0160700-01,OS11T0160700-02,OS11T0657200-01	CC	0.01654	0.0341827	5	114
GO:0005681	spliceosomal complex	OS01T0956600-01,OS02T0759800-01,OS02T0759800-02,OS08T0154700-01,OS11T0657300-01	CC	0.0177	0.0342937	5	116
GO:0008180	COP9 signalosome	OS03T0197400-01,OS03T0197400-02	CC	0.01788	0.0316731	2	16
GO:0071014	post-mRNA release spliceosomal complex	OS02T0759800-01,OS02T0759800-02	CC	0.01788	0.0316731	2	16
GO:1902494	catalytic complex	OS01T0109700-01,OS01T0754200-01,OS01T0754200-02,OS01T0754200-03,OS01T0754200-04,OS01T0846900-01,OS02T0170100-01,OS02T0170100-02,OS02T0689800-01,OS02T0759800-01,OS02T0759800-02,OS03T0223700-01,OS06T0127900-01,OS06T0607800-01,OS08T0154700-01,OS10T0409900-01,OS10T0409900-02	CC	0.02021	0.0329742	17	758
GO:0044428	nuclear part	OS01T0109700-01,OS01T0846900-01,OS01T0956600-01,OS02T0689800-01,OS02T0759800-01,OS02T0759800-02,OS03T0197400-01,OS03T0197400-02,OS06T0607800-01,OS07T0158500-00,OS08T0154600-01,OS08T0154700-01,OS08T0155000-01,OS08T0155000-02,OS11T0160700-01,OS11T0160700-02,OS11T0657200-01,OS11T0657300-01	CC	0.02333	0.0361615	18	831
GO:0000228	nuclear chromosome	OS02T0689800-01,OS08T0154600-01,OS11T0160700-01,OS11T0160700-02,OS11T0657200-01	CC	0.0236	0.0348381	5	125
GO:0044427	chromosomal part	OS01T0109700-01,OS01T0152700-01,OS02T0689800-01,OS08T0154600-01,OS11T0160700-01,OS11T0160700-02,OS11T0657200-01	CC	0.02611	0.0367914	7	222
GO:0005777	peroxisome	OS09T0459800-01,OS09T0459800-02,OS09T0459800-03,OS09T0459800-04	CC	0.02668	0.0351949	4	87
GO:0042579	microbody	OS09T0459800-01,OS09T0459800-02,OS09T0459800-03,OS09T0459800-04	CC	0.02668	0.0351949	4	87
GO:0000784	nuclear chromosome, telomeric region	OS11T0160700-01,OS11T0160700-02	CC	0.02736	0.0339264	2	20
GO:0031463	Cul3-RING ubiquitin ligase complex	OS10T0409900-01,OS10T0409900-02	CC	0.02999	0.0357573	2	21
GO:0032991	protein-containing complex	OS01T0109700-01,OS01T0152700-01,OS01T0193900-01,OS01T0193900-02,OS01T0754200-01,OS01T0754200-02,OS01T0754200-03,OS01T0754200-04,OS01T0846900-01,OS01T0956600-01,OS01T0964000-01,OS01T0964000-02,OS02T0170100-01,OS02T0170100-02,OS02T0553600-01,OS02T0689800-01,OS02T0759800-01,OS02T0759800-02,OS03T0169400-01,OS03T0197400-01,OS03T0197400-02,OS03T0223700-01,OS03T0755700-00,OS05T0154500-01,OS05T0488500-01…	CC	0.03344	0.0383941	42	2450
GO:0000781	chromosome, telomeric region	OS11T0160700-01,OS11T0160700-02	CC	0.03552	0.0393257	2	23
GO:0016514	SWI/SNF complex	OS02T0689800-01	CC	0.03847	0.0397523	1	3
GO:0089701	U2AF	OS01T0956600-01	CC	0.03847	0.0397523	1	3
GO:1990726	Lsm1-7-Pat1 complex	OS08T0154700-01	CC	0.03847	0.0397523	1	3
