# Supplementary material for: Transcriptional Landscape of Pathogen-responsive Lncrnas Reveals OS_LNC1812-Induced Disease Resistance by Abscisic Acid Pathway in Rice
Source: Research Square preprint supplement (doi:10.21203/rs.3.rs-244393/v1), 2021-03-01
Supplement: Supplementary file 10 [file c80f28a3ced12fee8cbf17fc.xlsx]

## Sheet: tables10_2
TFid	TF name	lncRNA	Targets	Description
Os03t0182800-01	ERF	OS_LNC0006	Os04t0690800-01	22-kDa Photosystem II protein, Photoprotection
Os02t0557500-01	C3H	OS_LNC0006	Os07t0124900-01	Allergen V5/Tpx-1 related family protein.
Os07t0683200-01	NAC	OS_LNC0006	Os11t0239500-01	Alpha/beta hydrolase fold-3 domain containing protein.
Os05t0194500-01	NAC	OS_LNC0006	Os11t0146200-01	Ankyrin repeat domain containing protein.
Os03t0182800-01	ERF	OS_LNC0006	Os07t0198300-01	Bifunctional inhibitor/plant lipid transfer protein/seed storage domain containing protein.
Os03t0182800-01	ERF	OS_LNC0006	Os03t0216700-01	Citrate transporter, Efficient translocation of Fe
Os03t0182800-01	ERF	OS_LNC0006	Os01t0130900-01	Conserved hypothetical protein.
Os07t0683200-01	NAC	OS_LNC0006	Os01t0685100-02	Conserved hypothetical protein.
Os03t0182800-01	ERF	OS_LNC0006	Os04t0624900-01	Conserved hypothetical protein.
Os02t0557500-01	C3H	OS_LNC0006	Os05t0357850-01	Conserved hypothetical protein.
Os07t0683200-01	NAC	OS_LNC0006	Os06t0609800-01	Conserved hypothetical protein.
Os07t0683200-01	NAC	OS_LNC0006	Os08t0530500-01	Conserved hypothetical protein.
Os03t0182800-01	ERF	OS_LNC0006	Os10t0432200-01	Conserved hypothetical protein.
Os07t0683200-01	NAC	OS_LNC0006	Os04t0191800-01	Cyclin-like F-box domain containing protein.
Os03t0182800-01	ERF	OS_LNC0006	Os02t0199200-00	Disease resistance protein domain containing protein.
Os07t0683200-01	NAC	OS_LNC0006	Os03t0586900-01	DNA helicase, putative domain containing protein.
Os02t0557500-01	C3H	OS_LNC0006	Os12t0444500-01	EGF-like region, conserved site domain containing protein.
Os03t0182800-01	ERF	OS_LNC0006	Os02t0533000-00	FeS cluster biogenesis domain containing protein.
Os07t0683200-01	NAC	OS_LNC0006	Os01t0860800-02	Glycoside hydrolase, family 17 protein.
Os02t0557500-01	C3H	OS_LNC0006	Os04t0556000-01	Heavy metal P-type ATPase, Xylem loading of copper
Os03t0182800-01	ERF	OS_LNC0006	Os04t0684100-02	Hypothetical conserved gene.
Os02t0557500-01	C3H	OS_LNC0006	Os07t0598700-00	Hypothetical conserved gene.
Os03t0182800-01	ERF	OS_LNC0006	Os08t0522100-00	Hypothetical conserved gene.
Os07t0683200-01	NAC	OS_LNC0006	Os09t0449400-01	Hypothetical conserved gene.
Os03t0182800-01	ERF	OS_LNC0006	Os05t0494800-01	Hypothetical protein.
Os05t0194500-01	NAC	OS_LNC0006	Os05t0494800-01	Hypothetical protein.
Os02t0557500-01	C3H	OS_LNC0006	Os10t0516800-01	Long-chain base kinase, Regulation of disease resistance response and programmed cell death
Os05t0194500-01	NAC	OS_LNC0006	Os03t0266900-02	Low molecular mass heat shock protein Oshsp17.3.
Os02t0557500-01	C3H	OS_LNC0006	Os02t0732700-01	Mediator complex, subunit Med23 domain containing protein.
Os02t0557500-01	C3H	OS_LNC0006	Os01t0667200-02	Mitochondrial sulfur dioxygenase, Abiotic stress response
Os02t0557500-01	C3H	OS_LNC0006	Os01t0846000-01	Nucleic acid-binding, OB-fold domain containing protein.
Os05t0194500-01	NAC	OS_LNC0006	Os01t0846000-01	Nucleic acid-binding, OB-fold domain containing protein.
Os07t0683200-01	NAC	OS_LNC0006	Os03t0203100-01	Nucleolar 27S pre-rRNA processing, Urb2/Npa2, C-terminal domain containing protein.
Os02t0557500-01	C3H	OS_LNC0006	Os10t0444700-02	Phosphate transporter, Pi homeostasis
Os02t0557500-01	C3H	OS_LNC0006	Os04t0271200-01	Protein-tyrosine phosphatase-like, PTPLA domain containing protein.
Os07t0683200-01	NAC	OS_LNC0006	Os05t0463400-01	PWWP domain containing protein.
Os03t0182800-01	ERF	OS_LNC0006	Os04t0504600-01	Pyruvate/Phosphoenolpyruvate kinase, catalytic core domain containing protein.
Os07t0683200-01	NAC	OS_LNC0006	Os02t0116800-01	Remorin, C-terminal region domain containing protein.
Os07t0683200-01	NAC	OS_LNC0006	Os04t0509400-01	RmlC-like jelly roll fold domain containing protein.
Os02t0557500-01	C3H	OS_LNC0006	Os03t0319400-01	Serine/threonine protein kinase, Cold stress tolerance, Abiotic stresses
Os02t0557500-01	C3H	OS_LNC0006	Os02t0784700-00	Similar to 26S protease regulatory subunit 7.
Os02t0557500-01	C3H	OS_LNC0006	Os02t0833100-01	Similar to antiporter/ drug transporter.
Os03t0182800-01	ERF	OS_LNC0006	Os02t0833100-01	Similar to antiporter/ drug transporter.
Os07t0683200-01	NAC	OS_LNC0006	Os02t0833100-01	Similar to antiporter/ drug transporter.
Os07t0683200-01	NAC	OS_LNC0006	Os05t0535100-01	Similar to Beta-1,3-glucanase-like protein.
Os03t0182800-01	ERF	OS_LNC0006	Os01t0808100-01	Similar to BZIP transcription factor.
Os02t0557500-01	C3H	OS_LNC0006	Os07t0660000-00	Similar to cDNA clone:J013120J20, full insert sequence.
Os02t0557500-01	C3H	OS_LNC0006	Os03t0711400-01	Similar to Coatomer alpha subunit.
Os02t0557500-01	C3H	OS_LNC0006	Os03t0341300-01	Similar to Cytochrome c oxidoreductase.
Os07t0683200-01	NAC	OS_LNC0006	Os10t0167250-00	Similar to Cytochrome P450 CYP76H18.
Os02t0557500-01	C3H	OS_LNC0006	Os10t0555100-01	Similar to DNA chromosome 4, ESSA I CONTIG fragment NO. 6.
Os02t0557500-01	C3H	OS_LNC0006	Os01t0685500-01	Similar to DNA ligase.
Os02t0557500-01	C3H	OS_LNC0006	Os01t0525800-01	Similar to DVL5.
Os02t0557500-01	C3H	OS_LNC0006	Os12t0138050-00	Similar to EF hand family protein, expressed.
Os05t0194500-01	NAC	OS_LNC0006	Os12t0138050-00	Similar to EF hand family protein, expressed.
Os02t0557500-01	C3H	OS_LNC0006	Os01t0837200-01	Similar to esterase/lipase/thioesterase family protein.
Os03t0182800-01	ERF	OS_LNC0006	Os01t0837200-01	Similar to esterase/lipase/thioesterase family protein.
Os03t0182800-01	ERF	OS_LNC0006	Os07t0405100-01	Similar to F-box-like/WD-repeat protein ebi.
Os07t0683200-01	NAC	OS_LNC0006	Os07t0405100-01	Similar to F-box-like/WD-repeat protein ebi.
Os05t0194500-01	NAC	OS_LNC0006	Os07t0522600-02	Similar to glutamate-gated kainate-type ion channel receptor subunit GluR5.
Os05t0194500-01	NAC	OS_LNC0006	Os04t0631100-01	Similar to H0105C05.5 protein.
Os07t0683200-01	NAC	OS_LNC0006	Os04t0690900-01	Similar to H0323C08.15 protein.
Os02t0557500-01	C3H	OS_LNC0006	Os04t0563801-00	Similar to H0409D10.4 protein.
Os03t0182800-01	ERF	OS_LNC0006	Os01t0192500-00	Similar to H0525G02.3 protein.
Os03t0182800-01	ERF	OS_LNC0006	Os04t0666800-01	Similar to H1005F08.21 protein.
Os05t0194500-01	NAC	OS_LNC0006	Os02t0537400-01	Similar to Heat shock protein.
Os03t0182800-01	ERF	OS_LNC0006	Os01t0521400-01	Similar to lipase family protein.
Os03t0182800-01	ERF	OS_LNC0006	Os11t0485900-01	Similar to NB-ARC domain containing protein, expressed.
Os03t0182800-01	ERF	OS_LNC0006	Os10t0558700-02	Similar to Oxidoreductase, 2OG-Fe oxygenase family protein, expressed.
Os02t0557500-01	C3H	OS_LNC0006	Os01t0966100-01	Similar to Peroxisomal ABC transporter.
Os07t0683200-01	NAC	OS_LNC0006	Os07t0661450-00	Similar to predicted protein.
Os03t0182800-01	ERF	OS_LNC0006	Os07t0512100-01	Similar to protein binding protein.
Os05t0194500-01	NAC	OS_LNC0006	Os09t0509200-01	Similar to Pyruvate dehydrogenase E1 beta subunit isoform 3.
Os07t0683200-01	NAC	OS_LNC0006	Os10t0566400-01	Similar to RING-H2 finger protein ATL3J.
Os03t0182800-01	ERF	OS_LNC0006	Os01t0631200-01	Similar to siroheme uroporphyrinogen methyltransferase1.
Os07t0683200-01	NAC	OS_LNC0006	Os06t0166400-01	Similar to TINY-like protein.
Os03t0182800-01	ERF	OS_LNC0006	Os01t0734800-01	UDP-glucuronosyl/UDP-glucosyltransferase family protein.
Os03t0182800-01	ERF	OS_LNC0006	Os09t0482900-01	UDP-glucuronosyl/UDP-glucosyltransferase family protein.
Os05t0194500-01	NAC	OS_LNC0006	Os07t0657200-02	WD40/YVTN repeat-like domain containing protein.
Os02t0557500-01	C3H	OS_LNC0006	Os09t0363600-01	WD40/YVTN repeat-like domain containing protein.
Os03t0182800-01	ERF	OS_LNC0006	Os09t0363600-01	WD40/YVTN repeat-like domain containing protein.
Os05t0194500-01	NAC	OS_LNC0006	Os09t0363600-01	WD40/YVTN repeat-like domain containing protein.
Os07t0683200-01	NAC	OS_LNC0006	Os04t0562000-01	Zinc finger, DHHC-type domain containing protein.
Os02t0557500-01	C3H	OS_LNC0006	Os03t0377600-01	Zinc finger, RING/FYVE/PHD-type domain containing protein.
Os07t0683200-01	NAC	OS_LNC0006	Os03t0377600-01	Zinc finger, RING/FYVE/PHD-type domain containing protein.
Os01t0313300-01	ERF	OS_LNC0105	Os06t0633800-01	Amino acid transporter, transmembrane domain containing protein.
MSTRG.16274.5	C2H2	OS_LNC0105	Os01t0685100-02	Conserved hypothetical protein.
Os01t0313300-01	ERF	OS_LNC0105	Os01t0910900-01	Conserved hypothetical protein.
Os01t0313300-01	ERF	OS_LNC0105	Os06t0581701-01	Conserved hypothetical protein.
Os01t0313300-01	ERF	OS_LNC0105	Os02t0199200-00	Disease resistance protein domain containing protein.
Os01t0313300-01	ERF	OS_LNC0105	Os02t0156600-00	Hypothetical conserved gene.
Os01t0313300-01	ERF	OS_LNC0105	Os05t0360800-00	Hypothetical conserved gene.
MSTRG.16274.5	C2H2	OS_LNC0105	Os10t0130701-01	Hypothetical conserved gene.
Os01t0313300-01	ERF	OS_LNC0105	Os02t0749200-01	Hypothetical protein.
Os01t0313300-01	ERF	OS_LNC0105	Os04t0451000-02	Hypothetical protein.
MSTRG.16274.5	C2H2	OS_LNC0105	Os03t0684300-01	Nucleic acid binding, OB-fold, tRNA/helicase-type domain containing protein.
Os01t0313300-01	ERF	OS_LNC0105	Os01t0170800-01	Pentatricopeptide repeat domain containing protein.
Os01t0313300-01	ERF	OS_LNC0105	Os10t0407100-01	Ribosomal protein L32p domain containing protein.
Os01t0313300-01	ERF	OS_LNC0105	Os06t0313440-00	SAM dependent carboxyl methyltransferase domain containing protein.
MSTRG.16274.5	C2H2	OS_LNC0105	Os02t0784700-00	Similar to 26S protease regulatory subunit 7.
Os01t0313300-01	ERF	OS_LNC0105	Os01t0945200-00	Similar to BAT1
MSTRG.16274.5	C2H2	OS_LNC0105	Os01t0686000-01	Similar to cDNA, clone: J100026I16, full insert sequence.
MSTRG.16274.5	C2H2	OS_LNC0105	Os03t0341300-01	Similar to Cytochrome c oxidoreductase.
Os01t0313300-01	ERF	OS_LNC0105	Os03t0341300-01	Similar to Cytochrome c oxidoreductase.
MSTRG.16274.5	C2H2	OS_LNC0105	Os03t0248300-01	Similar to Cytochrome P450 76C4.
MSTRG.16274.5	C2H2	OS_LNC0105	Os01t0685500-01	Similar to DNA ligase.
Os01t0313300-01	ERF	OS_LNC0105	Os02t0561900-00	Similar to E3 ubiquitin-protein ligase EL5.
Os01t0313300-01	ERF	OS_LNC0105	Os04t0420300-00	Similar to H0525E10.1 protein.
MSTRG.16274.5	C2H2	OS_LNC0105	Os01t0521400-01	Similar to lipase family protein.
MSTRG.16274.5	C2H2	OS_LNC0105	Os09t0411650-01	Similar to Ribulose-1,5 bisphosphate carboxylase/oxygenase large subunit N- methyltransferase, chloroplast precursor.
Os01t0313300-01	ERF	OS_LNC0105	Os03t0149800-01	Similar to RING-H2 finger protein ATL1D.
Os01t0313300-01	ERF	OS_LNC0105	Os05t0182600-01	Similar to SSRP1 protein.
Os01t0313300-01	ERF	OS_LNC0105	Os03t0307400-01	Six-bladed beta-propeller, TolB-like domain containing protein.
MSTRG.16274.5	C2H2	OS_LNC0105	Os06t0714600-01	Small G protein, Negative regulation of brassinosteroid signaling
Os01t0313300-01	ERF	OS_LNC0105	Os05t0485300-01	TRAM, LAG1 and CLN8 homology domain containing protein.
Os01t0313300-01	ERF	OS_LNC0105	Os06t0182500-02	Zinc finger, LIM-type domain containing protein.
Os07t0684800-01	NAC	OS_LNC0202	Os12t0118800-01	Ankyrin repeat containing protein.
Os07t0684800-01	NAC	OS_LNC0202	Os02t0264300-01	Conserved hypothetical protein.
Os07t0684800-01	NAC	OS_LNC0202	Os05t0357850-01	Conserved hypothetical protein.
Os07t0684800-01	NAC	OS_LNC0202	Os02t0533000-00	FeS cluster biogenesis domain containing protein.
Os07t0684800-01	NAC	OS_LNC0202	Os12t0528801-01	Hypothetical gene.
Os07t0684800-01	NAC	OS_LNC0202	Os04t0672600-01	Leucine-rich repeat, N-terminal domain containing protein.
Os07t0684800-01	NAC	OS_LNC0202	Os02t0732700-01	Mediator complex, subunit Med23 domain containing protein.
Os07t0684800-01	NAC	OS_LNC0202	Os03t0327800-01	NAC Family transcriptional activator, Abiotic stress response, Positive regulator of leaf senescence
Os07t0684800-01	NAC	OS_LNC0202	Os03t0684300-01	Nucleic acid binding, OB-fold, tRNA/helicase-type domain containing protein.
Os07t0684800-01	NAC	OS_LNC0202	Os11t0657100-01	Peptide chain release factor 1 family protein.
Os07t0684800-01	NAC	OS_LNC0202	Os09t0482640-01	Serine/threonine protein kinase-related domain containing protein.
Os07t0684800-01	NAC	OS_LNC0202	Os02t0784700-00	Similar to 26S protease regulatory subunit 7.
Os07t0684800-01	NAC	OS_LNC0202	Os01t0686000-01	Similar to cDNA, clone: J100026I16, full insert sequence.
Os07t0684800-01	NAC	OS_LNC0202	Os01t0525800-01	Similar to DVL5.
Os07t0684800-01	NAC	OS_LNC0202	Os01t0837200-01	Similar to esterase/lipase/thioesterase family protein.
Os07t0684800-01	NAC	OS_LNC0202	Os12t0543600-00	Similar to sarcosine oxidase.
Os07t0684800-01	NAC	OS_LNC0202	Os05t0182600-01	Similar to SSRP1 protein.
Os07t0684800-01	NAC	OS_LNC0202	Os03t0833200-01	tRNA nucleoside methyltransferase, Methyltransferase for the 2'-O-methyladenosine nucleoside modification, Regulation of salt stress tolerance, ABA hormone response
Os07t0667300-01	CO-like	OS_LNC0322	Os06t0703800-01	Activator of Hsp90 ATPase, N-terminal domain containing protein.
Os07t0667300-01	CO-like	OS_LNC0322	Os01t0588400-01	Band 7 protein family protein.
Os07t0667300-01	CO-like	OS_LNC0322	Os02t0673500-01	Basic helix-loop-helix dimerisation region bHLH domain containing protein.
MSTRG.13502.2	Trihelix	OS_LNC0322	Os01t0133500-01	Beta-lactamase-like domain containing protein.
MSTRG.5585.2	bZIP	OS_LNC0322	Os07t0198300-01	Bifunctional inhibitor/plant lipid transfer protein/seed storage domain containing protein.
Os07t0667300-01	CO-like	OS_LNC0322	Os01t0706600-00	Conserved hypothetical protein.
Os07t0667300-01	CO-like	OS_LNC0322	Os02t0552700-01	Conserved hypothetical protein.
MSTRG.13502.2	Trihelix	OS_LNC0322	Os03t0102600-01	Conserved hypothetical protein.
MSTRG.5585.2	bZIP	OS_LNC0322	Os06t0609800-01	Conserved hypothetical protein.
Os03t0119966-01	NAC	OS_LNC0322	Os06t0609800-01	Conserved hypothetical protein.
Os07t0667300-01	CO-like	OS_LNC0322	Os07t0638000-01	Conserved hypothetical protein.
Os07t0667300-01	CO-like	OS_LNC0322	Os08t0170800-01	Conserved hypothetical protein.
Os07t0667300-01	CO-like	OS_LNC0322	Os09t0412400-01	Conserved hypothetical protein.
MSTRG.5585.2	bZIP	OS_LNC0322	Os09t0430701-00	Conserved hypothetical protein.
MSTRG.13502.2	Trihelix	OS_LNC0322	Os12t0222300-01	Conserved hypothetical protein.
Os03t0119966-01	NAC	OS_LNC0322	Os03t0617500-01	Cyclin, C-terminal domain containing protein.
Os07t0667300-01	CO-like	OS_LNC0322	Os07t0122900-01	Cyclin-like F-box domain containing protein.
MSTRG.13502.2	Trihelix	OS_LNC0322	Os05t0424300-01	Cytochrome P450 family protein.
MSTRG.13502.2	Trihelix	OS_LNC0322	Os10t0439924-01	Cytochrome P450 family protein.
Os07t0667300-01	CO-like	OS_LNC0322	Os03t0586900-01	DNA helicase, putative domain containing protein.
Os03t0119966-01	NAC	OS_LNC0322	Os03t0108000-01	Dual-specificity tyrosine-phosphatase CDC25, Arsenic metabolism
Os03t0119966-01	NAC	OS_LNC0322	Os08t0461700-01	F-box domain, cyclin-like domain containing protein.
MSTRG.13502.2	Trihelix	OS_LNC0322	Os07t0634400-01	HAD-superfamily hydrolase, subfamily IA, variant 3 domain containing protein.
Os03t0119966-01	NAC	OS_LNC0322	Os03t0737300-01	HAD-superfamily phosphatase, subfamily IIIC domain containing protein.
MSTRG.5585.2	bZIP	OS_LNC0322	Os02t0555832-01	Hypothetical gene.
MSTRG.13502.2	Trihelix	OS_LNC0322	Os03t0197175-00	Hypothetical gene.
Os07t0667300-01	CO-like	OS_LNC0322	Os06t0473700-01	Hypothetical gene.
Os03t0119966-01	NAC	OS_LNC0322	Os12t0562433-00	Hypothetical gene.
Os03t0119966-01	NAC	OS_LNC0322	Os07t0538350-00	Hypothetical protein.
Os07t0667300-01	CO-like	OS_LNC0322	Os07t0660466-00	Hypothetical protein.
Os03t0119966-01	NAC	OS_LNC0322	Os11t0261900-01	Metallophosphoesterase domain containing protein.
Os07t0667300-01	CO-like	OS_LNC0322	Os10t0573800-01	Mitochondrial carnitine/acylcarnitine carrier-like protein.
Os03t0119966-01	NAC	OS_LNC0322	Os11t0207600-00	Myb-like protein.
MSTRG.5585.2	bZIP	OS_LNC0322	Os01t0846000-01	Nucleic acid-binding, OB-fold domain containing protein.
Os07t0667300-01	CO-like	OS_LNC0322	Os01t0846000-01	Nucleic acid-binding, OB-fold domain containing protein.
Os07t0667300-01	CO-like	OS_LNC0322	Os01t0819800-01	Pentatricopeptide repeat domain containing protein.
Os07t0667300-01	CO-like	OS_LNC0322	Os10t0538200-01	Peptidase aspartic, catalytic domain containing protein.
Os07t0667300-01	CO-like	OS_LNC0322	Os10t0495900-01	Protein of unknown function DUF1218 family protein.
Os07t0667300-01	CO-like	OS_LNC0322	Os10t0479800-01	Protein of unknown function DUF1336 domain containing protein.
Os07t0667300-01	CO-like	OS_LNC0322	Os10t0508600-01	Protein of unknown function DUF1352 domain containing protein.
MSTRG.13502.2	Trihelix	OS_LNC0322	Os07t0122100-01	Protein of unknown function DUF1719, Oryza sativa family protein.
Os07t0667300-01	CO-like	OS_LNC0322	Os05t0531100-01	Protein of unknown function DUF584 family protein.
Os03t0119966-01	NAC	OS_LNC0322	Os10t0560000-01	Protein of unknown function DUF828, plant family protein.
MSTRG.5585.2	bZIP	OS_LNC0322	Os09t0325700-01	Protein phosphatase 2C, Abiotic stress response, Early panicle development
MSTRG.5585.2	bZIP	OS_LNC0322	Os01t0908100-01	RabGAP/TBC domain containing protein.
Os03t0119966-01	NAC	OS_LNC0322	Os01t0908100-01	RabGAP/TBC domain containing protein.
MSTRG.13502.2	Trihelix	OS_LNC0322	Os01t0908100-01	RabGAP/TBC domain containing protein.
Os03t0119966-01	NAC	OS_LNC0322	Os02t0719600-01	SAM dependent carboxyl methyltransferase family protein.
Os07t0667300-01	CO-like	OS_LNC0322	Os01t0100700-01	Similar to 40S ribosomal protein S5-1.
Os03t0119966-01	NAC	OS_LNC0322	Os09t0298200-01	Similar to Brittle 2.
Os03t0119966-01	NAC	OS_LNC0322	Os09t0481400-01	Similar to Caffeoyl-CoA O-methyltransferase.
MSTRG.13502.2	Trihelix	OS_LNC0322	Os09t0481400-01	Similar to Caffeoyl-CoA O-methyltransferase.
Os03t0119966-01	NAC	OS_LNC0322	Os03t0130300-01	Similar to Cp-thionin.
MSTRG.13502.2	Trihelix	OS_LNC0322	Os02t0504000-01	Similar to Cytochrome P450 CYP81L6.
MSTRG.5585.2	bZIP	OS_LNC0322	Os01t0525800-01	Similar to DVL5.
MSTRG.5585.2	bZIP	OS_LNC0322	Os11t0141400-01	Similar to EF hand family protein, expressed.
Os07t0667300-01	CO-like	OS_LNC0322	Os03t0367200-01	Similar to Flavonoid 3',5'-hydroxylase.
Os03t0119966-01	NAC	OS_LNC0322	Os03t0316200-01	Similar to Galactinol synthase.
Os07t0667300-01	CO-like	OS_LNC0322	Os05t0437700-01	Similar to G-box-binding factor 4.
Os07t0667300-01	CO-like	OS_LNC0322	Os04t0209300-01	Similar to Glutathione-conjugate transporter AtMRP4.
MSTRG.5585.2	bZIP	OS_LNC0322	Os04t0370900-01	Similar to H0607F01.5 protein.
MSTRG.5585.2	bZIP	OS_LNC0322	Os02t0537400-01	Similar to Heat shock protein.
MSTRG.5585.2	bZIP	OS_LNC0322	Os01t0190400-01	Similar to Hexokinase.
MSTRG.5585.2	bZIP	OS_LNC0322	Os03t0101300-01	Similar to Hexose transporter.
Os07t0667300-01	CO-like	OS_LNC0322	Os06t0103300-01	Similar to Homogentisate 1,2-dioxygenase.
MSTRG.13502.2	Trihelix	OS_LNC0322	Os07t0119000-01	Similar to MAP3K gamma protein kinase.
Os03t0119966-01	NAC	OS_LNC0322	Os02t0573500-01	Similar to Monosaccharide transporter 1.
MSTRG.5585.2	bZIP	OS_LNC0322	Os02t0302700-01	Similar to Nicotianamine aminotransferase A.
Os03t0119966-01	NAC	OS_LNC0322	Os04t0474800-02	Similar to OSIGBa0135C13.7 protein.
MSTRG.5585.2	bZIP	OS_LNC0322	Os06t0339500-01	Similar to OSIGBa0137A06.2 protein.
Os07t0667300-01	CO-like	OS_LNC0322	Os07t0663800-01	Similar to Oxidoreductase, short chain dehydrogenase/reductase family protein, expressed.
Os07t0667300-01	CO-like	OS_LNC0322	Os12t0105600-01	Similar to Phosphate starvation regulator protein.
MSTRG.13502.2	Trihelix	OS_LNC0322	Os06t0264300-01	Similar to RAD23, isoform I.
Os03t0119966-01	NAC	OS_LNC0322	Os07t0538400-01	Similar to Receptor-like protein kinase 4.
MSTRG.13502.2	Trihelix	OS_LNC0322	Os12t0543600-00	Similar to sarcosine oxidase.
Os07t0667300-01	CO-like	OS_LNC0322	Os09t0483400-01	Similar to Ubiquitin/ribosomal fusion protein.
MSTRG.13502.2	Trihelix	OS_LNC0322	Os02t0224400-01	Similar to Xaa-Pro dipeptidase.
MSTRG.5585.2	bZIP	OS_LNC0322	Os02t0202600-01	Tetratricopeptide-like helical domain containing protein.
MSTRG.13502.2	Trihelix	OS_LNC0322	Os01t0194600-02	Thioredoxin fold domain containing protein.
Os07t0667300-01	CO-like	OS_LNC0322	Os07t0580500-01	Transcription factor, Brassinosteroid-regulated growth response, Feedback inhibition of BR biosynthesis
Os07t0667300-01	CO-like	OS_LNC0322	Os01t0734800-01	UDP-glucuronosyl/UDP-glucosyltransferase family protein.
Os07t0667300-01	CO-like	OS_LNC0322	Os06t0567000-01	Uncharacterised protein family UPF0197 domain containing protein.
Os07t0667300-01	CO-like	OS_LNC0322	Os07t0442900-01	Uncharacterised protein family UPF0497, trans-membrane plant subgroup domain containing protein.
Os07t0667300-01	CO-like	OS_LNC0322	Os01t0511100-01	UspA domain containing protein.
MSTRG.5585.2	bZIP	OS_LNC0322	Os07t0657200-02	WD40/YVTN repeat-like domain containing protein.
MSTRG.5585.2	bZIP	OS_LNC0322	Os08t0562300-01	Zinc finger, C2H2-type domain containing protein.
Os03t0119966-01	NAC	OS_LNC0322	Os03t0142500-01	Zinc finger, RING/FYVE/PHD-type domain containing protein.
Os07t0667300-01	CO-like	OS_LNC0322	Os06t0608800-04	Zinc finger, RING/FYVE/PHD-type domain containing protein.
Os07t0667300-01	CO-like	OS_LNC0322	Os07t0686300-01	Zinc finger, RING/FYVE/PHD-type domain containing protein.
MSTRG.34411.1	NAC	OS_LNC0494	Os04t0182200-01	2OG-Fe(II) oxygenase domain containing protein.
MSTRG.34411.1	NAC	OS_LNC0494	Os06t0677400-01	3-hydroxyisobutyrate dehydrogenase domain containing protein.
MSTRG.9202.1	HD-ZIP	OS_LNC0494	Os08t0448000-01	4-coumarate:coenzyme A ligase, Lignin biosynthesis, Defense against wounding
Os01t0730700-01	WRKY	OS_LNC0494	Os08t0448000-01	4-coumarate:coenzyme A ligase, Lignin biosynthesis, Defense against wounding
Os10t0413700-01	NAC	OS_LNC0494	Os06t0133900-01	5-enolpyruvylshikimate-3-phosphate synthase
Os10t0413700-01	NAC	OS_LNC0494	Os03t0699700-01	9-lipoxigenase.
Os01t0575200-01	bHLH	OS_LNC0494	Os02t0139100-01	Activator of Hsp90 ATPase, N-terminal domain containing protein.
Os01t0730700-01	WRKY	OS_LNC0494	Os02t0139100-01	Activator of Hsp90 ATPase, N-terminal domain containing protein.
MSTRG.9202.1	HD-ZIP	OS_LNC0494	Os04t0466600-01	Agmatine deiminase domain containing protein.
MSTRG.34411.1	NAC	OS_LNC0494	Os01t0595600-01	Alpha/beta hydrolase fold-1 domain containing protein.
MSTRG.34411.1	NAC	OS_LNC0494	Os02t0567800-01	Alpha/beta hydrolase fold-3 domain containing protein.
Os01t0575200-01	bHLH	OS_LNC0494	Os05t0410200-01	Alpha/beta hydrolase fold-3 domain containing protein.
Os10t0413700-01	NAC	OS_LNC0494	Os11t0239500-01	Alpha/beta hydrolase fold-3 domain containing protein.
Os01t0758200-01	Dof	OS_LNC0494	Os10t0184300-01	ATPase, V0/A0 complex, 116-kDa subunit family protein.
MSTRG.34411.1	NAC	OS_LNC0494	Os01t0768333-00	Auxin responsive SAUR protein family protein.
Os10t0413700-01	NAC	OS_LNC0494	Os02t0673500-01	Basic helix-loop-helix dimerisation region bHLH domain containing protein.
MSTRG.34411.1	NAC	OS_LNC0494	Os02t0194900-00	Basic-leucine zipper transcription factor domain containing protein.
MSTRG.34411.1	NAC	OS_LNC0494	Os09t0569400-01	Beta-lactamase-like domain containing protein.
Os01t0575200-01	bHLH	OS_LNC0494	Os12t0594600-01	BTB/POZ fold domain containing protein.
Os01t0730700-01	WRKY	OS_LNC0494	Os01t0867300-01	bZIP transcription factor, Abiotic stress response, ABA signaling, Suppressor of floral transition upon drought stress
MSTRG.9202.1	HD-ZIP	OS_LNC0494	Os01t0934100-01	C2 calcium-dependent membrane targeting domain containing protein.
Os01t0575200-01	bHLH	OS_LNC0494	Os09t0478100-01	Cellulose synthase family protein.
Os01t0575200-01	bHLH	OS_LNC0494	Os03t0807900-01	Chaperonin-like RbcX family protein.
MSTRG.34411.1	NAC	OS_LNC0494	Os03t0216700-01	Citrate transporter, Efficient translocation of Fe
MSTRG.9202.1	HD-ZIP	OS_LNC0494	Os11t0661800-01	Concanavalin A-like lectin/glucanase domain containing protein.
MSTRG.34411.1	NAC	OS_LNC0494	Os01t0194000-01	Conserved hypothetical protein.
Os01t0758200-01	Dof	OS_LNC0494	Os01t0670500-01	Conserved hypothetical protein.
MSTRG.9202.1	HD-ZIP	OS_LNC0494	Os01t0670500-01	Conserved hypothetical protein.
MSTRG.34411.1	NAC	OS_LNC0494	Os01t0670500-01	Conserved hypothetical protein.
MSTRG.7798.1	CAMTA	OS_LNC0494	Os01t0728400-01	Conserved hypothetical protein.
Os01t0730700-01	WRKY	OS_LNC0494	Os01t0833400-02	Conserved hypothetical protein.
MSTRG.34411.1	NAC	OS_LNC0494	Os03t0204900-01	Conserved hypothetical protein.
Os01t0730700-01	WRKY	OS_LNC0494	Os03t0204900-01	Conserved hypothetical protein.
Os10t0413700-01	NAC	OS_LNC0494	Os05t0194550-01	Conserved hypothetical protein.
MSTRG.9202.1	HD-ZIP	OS_LNC0494	Os06t0113500-01	Conserved hypothetical protein.
MSTRG.34411.1	NAC	OS_LNC0494	Os07t0151800-01	Conserved hypothetical protein.
MSTRG.34411.1	NAC	OS_LNC0494	Os07t0416700-00	Conserved hypothetical protein.
MSTRG.9202.1	HD-ZIP	OS_LNC0494	Os07t0679400-01	Conserved hypothetical protein.
MSTRG.34411.1	NAC	OS_LNC0494	Os08t0420700-01	Conserved hypothetical protein.
Os01t0575200-01	bHLH	OS_LNC0494	Os09t0129600-01	Conserved hypothetical protein.
Os01t0758200-01	Dof	OS_LNC0494	Os09t0129600-01	Conserved hypothetical protein.
MSTRG.7798.1	CAMTA	OS_LNC0494	Os09t0424701-00	Conserved hypothetical protein.
Os01t0730700-01	WRKY	OS_LNC0494	Os09t0430701-00	Conserved hypothetical protein.
Os01t0575200-01	bHLH	OS_LNC0494	Os09t0569700-01	Conserved hypothetical protein.
Os01t0730700-01	WRKY	OS_LNC0494	Os10t0557700-01	Conserved hypothetical protein.
Os10t0413700-01	NAC	OS_LNC0494	Os11t0670900-01	Conserved hypothetical protein.
MSTRG.9202.1	HD-ZIP	OS_LNC0494	Os12t0222300-01	Conserved hypothetical protein.
Os01t0730700-01	WRKY	OS_LNC0494	Os05t0529200-02	Crotonase, core domain containing protein.
Os01t0730700-01	WRKY	OS_LNC0494	Os02t0813166-00	Cyclin-like F-box domain containing protein.
Os01t0575200-01	bHLH	OS_LNC0494	Os02t0571900-01	Cytochrome P450 family protein.
MSTRG.7798.1	CAMTA	OS_LNC0494	Os02t0571900-01	Cytochrome P450 family protein.
Os01t0575200-01	bHLH	OS_LNC0494	Os06t0294600-02	Cytochrome P450 family protein.
Os10t0413700-01	NAC	OS_LNC0494	Os06t0501900-01	Cytochrome P450 family protein.
MSTRG.34411.1	NAC	OS_LNC0494	Os09t0272900-01	Disease resistance protein domain containing protein.
MSTRG.34411.1	NAC	OS_LNC0494	Os10t0394400-01	Disease resistance protein domain containing protein.
MSTRG.9202.1	HD-ZIP	OS_LNC0494	Os01t0135700-01	EF-HAND 2 domain containing protein.
Os10t0413700-01	NAC	OS_LNC0494	Os08t0461700-01	F-box domain, cyclin-like domain containing protein.
Os10t0413700-01	NAC	OS_LNC0494	Os11t0679700-01	Glycerol-3-phosphate acyltransferase, Anther development, Pollen formation
MSTRG.9202.1	HD-ZIP	OS_LNC0494	Os01t0897600-01	Glycoside hydrolase, family 1 protein.
Os01t0730700-01	WRKY	OS_LNC0494	Os02t0139300-01	Glycoside hydrolase, family 17 protein.
MSTRG.9202.1	HD-ZIP	OS_LNC0494	Os08t0522500-01	Glycoside hydrolase, family 19 protein.
MSTRG.34411.1	NAC	OS_LNC0494	Os03t0659300-01	Glyoxalase/bleomycin resistance protein/dioxygenase domain containing protein.
MSTRG.7798.1	CAMTA	OS_LNC0494	Os04t0556000-01	Heavy metal P-type ATPase, Xylem loading of copper
Os10t0413700-01	NAC	OS_LNC0494	Os01t0124650-02	Hypothetical conserved gene.
Os01t0575200-01	bHLH	OS_LNC0494	Os02t0209000-01	Hypothetical conserved gene.
Os01t0575200-01	bHLH	OS_LNC0494	Os02t0743800-02	Hypothetical conserved gene.
Os01t0758200-01	Dof	OS_LNC0494	Os03t0563200-01	Hypothetical conserved gene.
MSTRG.9202.1	HD-ZIP	OS_LNC0494	Os05t0360800-00	Hypothetical conserved gene.
MSTRG.9202.1	HD-ZIP	OS_LNC0494	Os06t0133300-00	Hypothetical conserved gene.
MSTRG.9202.1	HD-ZIP	OS_LNC0494	Os06t0499100-00	Hypothetical conserved gene.
MSTRG.9202.1	HD-ZIP	OS_LNC0494	Os06t0706500-00	Hypothetical conserved gene.
MSTRG.9202.1	HD-ZIP	OS_LNC0494	Os07t0121401-01	Hypothetical conserved gene.
Os01t0575200-01	bHLH	OS_LNC0494	Os08t0355500-03	Hypothetical conserved gene.
Os01t0730700-01	WRKY	OS_LNC0494	Os11t0139700-01	Hypothetical conserved gene.
MSTRG.9202.1	HD-ZIP	OS_LNC0494	Os11t0600600-01	Hypothetical conserved gene.
Os01t0730700-01	WRKY	OS_LNC0494	Os02t0644466-00	Hypothetical gene.
Os01t0758200-01	Dof	OS_LNC0494	Os06t0196550-00	Hypothetical gene.
Os10t0413700-01	NAC	OS_LNC0494	Os06t0487380-01	Hypothetical gene.
Os01t0758200-01	Dof	OS_LNC0494	Os11t0697600-00	Hypothetical gene.
MSTRG.34411.1	NAC	OS_LNC0494	Os12t0203900-01	Hypothetical gene.
Os10t0413700-01	NAC	OS_LNC0494	Os02t0303200-01	Hypothetical protein.
Os10t0413700-01	NAC	OS_LNC0494	Os02t0720450-00	Hypothetical protein.
Os01t0730700-01	WRKY	OS_LNC0494	Os03t0237201-00	Hypothetical protein.
Os10t0413700-01	NAC	OS_LNC0494	Os04t0615200-01	Hypothetical protein.
MSTRG.34411.1	NAC	OS_LNC0494	Os07t0503200-03	Hypothetical protein.
MSTRG.7798.1	CAMTA	OS_LNC0494	Os08t0165800-00	Hypothetical protein.
Os01t0575200-01	bHLH	OS_LNC0494	Os09t0558250-00	Hypothetical protein.
MSTRG.7798.1	CAMTA	OS_LNC0494	Os10t0559300-01	Hypothetical protein.
Os01t0575200-01	bHLH	OS_LNC0494	Os09t0567900-01	Inosine/uridine-preferring nucleoside hydrolase domain containing protein.
MSTRG.34411.1	NAC	OS_LNC0494	Os02t0645100-01	Kinesin, motor region domain containing protein.
Os01t0758200-01	Dof	OS_LNC0494	Os06t0140200-01	Leucine-rich repeat, plant specific containing protein.
Os01t0575200-01	bHLH	OS_LNC0494	Os05t0501600-01	Leucine-rich repeat, typical subtype containing protein.
MSTRG.9202.1	HD-ZIP	OS_LNC0494	Os05t0501600-01	Leucine-rich repeat, typical subtype containing protein.
Os01t0575200-01	bHLH	OS_LNC0494	Os11t0615000-01	LNS2, Lipin/Ned1/Smp2 domain containing protein.
Os10t0413700-01	NAC	OS_LNC0494	Os05t0451100-01	Major facilitator superfamily protein.
MSTRG.7798.1	CAMTA	OS_LNC0494	Os09t0371200-01	Major facilitator superfamily protein.
Os01t0730700-01	WRKY	OS_LNC0494	Os11t0261900-01	Metallophosphoesterase domain containing protein.
Os01t0575200-01	bHLH	OS_LNC0494	Os06t0141100-00	Monosaccharide transporter.
Os10t0413700-01	NAC	OS_LNC0494	Os09t0127300-01	NAD(P)-binding domain containing protein.
MSTRG.34411.1	NAC	OS_LNC0494	Os12t0565100-01	NB-ARC domain containing protein.
Os10t0413700-01	NAC	OS_LNC0494	Os05t0593000-01	Phospholipase A2, active site domain containing protein.
MSTRG.7798.1	CAMTA	OS_LNC0494	Os11t0180000-01	Plant disease resistance response protein family protein.
MSTRG.7798.1	CAMTA	OS_LNC0494	Os01t0743300-01	Protease-associated PA domain containing protein.
Os01t0730700-01	WRKY	OS_LNC0494	Os04t0618700-01	Protein kinase, core domain containing protein.
MSTRG.9202.1	HD-ZIP	OS_LNC0494	Os11t0621300-00	Protein of unknown function DUF1399 family protein.
MSTRG.34411.1	NAC	OS_LNC0494	Os01t0132500-01	Protein of unknown function DUF1639 domain containing protein.
Os10t0413700-01	NAC	OS_LNC0494	Os03t0303100-01	Protein of unknown function DUF1645 family protein.
Os01t0730700-01	WRKY	OS_LNC0494	Os03t0565300-01	Protein of unknown function DUF1723 domain containing protein.
MSTRG.9202.1	HD-ZIP	OS_LNC0494	Os06t0666100-01	Protein of unknown function DUF597 family protein.
Os10t0413700-01	NAC	OS_LNC0494	Os08t0153900-01	Protein of unknown function DUF599 family protein.
Os01t0575200-01	bHLH	OS_LNC0494	Os01t0389700-01	Protein of unknown function DUF679 family protein.
MSTRG.7798.1	CAMTA	OS_LNC0494	Os01t0389700-01	Protein of unknown function DUF679 family protein.
MSTRG.34411.1	NAC	OS_LNC0494	Os01t0389700-01	Protein of unknown function DUF679 family protein.
MSTRG.9202.1	HD-ZIP	OS_LNC0494	Os05t0281400-01	Protein of unknown function DUF810 domain containing protein.
MSTRG.34411.1	NAC	OS_LNC0494	Os06t0698300-01	Protein phosphatase 2C family protein.
MSTRG.34411.1	NAC	OS_LNC0494	Os01t0124100-01	Proteinase inhibitor I12, Bowman-Birk family protein.
Os01t0575200-01	bHLH	OS_LNC0494	Os07t0564500-01	Pyridine nucleotide-disulphide oxidoreductase, NAD-binding region domain containing protein.
MSTRG.34411.1	NAC	OS_LNC0494	Os07t0564500-01	Pyridine nucleotide-disulphide oxidoreductase, NAD-binding region domain containing protein.
MSTRG.34411.1	NAC	OS_LNC0494	Os02t0561800-01	RING-H2 type E3 ubiquitin ligase, Root development, Maintenance of cell viability after the initiation of root primordial formation, Defense response
MSTRG.7798.1	CAMTA	OS_LNC0494	Os02t0719600-01	SAM dependent carboxyl methyltransferase family protein.
Os10t0413700-01	NAC	OS_LNC0494	Os12t0424700-00	Serine/threonine protein kinase domain containing protein.
MSTRG.9202.1	HD-ZIP	OS_LNC0494	Os11t0225000-01	Serine/threonine protein kinase-related domain containing protein.
Os01t0730700-01	WRKY	OS_LNC0494	Os05t0580500-01	Similar to 10A19I.14.
MSTRG.7798.1	CAMTA	OS_LNC0494	Os07t0109300-00	Similar to 36I5.7.
Os10t0413700-01	NAC	OS_LNC0494	Os03t0152400-01	Similar to 4-coumarate--CoA ligase-like 1.
MSTRG.34411.1	NAC	OS_LNC0494	Os05t0163700-01	Similar to Acyl-coenzyme A oxidase 4, peroxisomal.
Os01t0575200-01	bHLH	OS_LNC0494	Os02t0625500-01	Similar to Adenosine kinase-like protein.
MSTRG.9202.1	HD-ZIP	OS_LNC0494	Os06t0221200-01	Similar to Annexin p33.
MSTRG.9202.1	HD-ZIP	OS_LNC0494	Os11t0100100-01	Similar to Autophagy-related protein 8D.
Os10t0413700-01	NAC	OS_LNC0494	Os11t0592000-01	Similar to Barwin.
MSTRG.34411.1	NAC	OS_LNC0494	Os11t0592100-01	Similar to Barwin.
Os01t0730700-01	WRKY	OS_LNC0494	Os01t0940800-01	Similar to Beta-1,3-glucanase precursor.
MSTRG.9202.1	HD-ZIP	OS_LNC0494	Os07t0654700-00	Similar to BLE2 protein.
MSTRG.9202.1	HD-ZIP	OS_LNC0494	Os12t0109200-01	Similar to Ca(2+)-dependent nuclease.
MSTRG.34411.1	NAC	OS_LNC0494	Os01t0233900-01	Similar to cDNA clone:J013003E06, full insert sequence.
MSTRG.34411.1	NAC	OS_LNC0494	Os06t0726200-02	Similar to Chitinase 1.
Os01t0575200-01	bHLH	OS_LNC0494	Os12t0170800-01	Similar to Citrate binding protein precursor.
Os01t0575200-01	bHLH	OS_LNC0494	Os05t0209000-01	Similar to Cytidine deaminase.
Os01t0575200-01	bHLH	OS_LNC0494	Os05t0320700-02	Similar to Cytochrome P450.
MSTRG.34411.1	NAC	OS_LNC0494	Os02t0742500-01	Similar to DEGP9
MSTRG.34411.1	NAC	OS_LNC0494	Os06t0499900-01	Similar to Dihydrolipoamide acetyltransferase subunit of PDC.
MSTRG.34411.1	NAC	OS_LNC0494	Os05t0402900-01	Similar to EDGP.
MSTRG.34411.1	NAC	OS_LNC0494	Os03t0153400-01	Similar to EMB1374.
Os01t0730700-01	WRKY	OS_LNC0494	Os02t0570400-01	Similar to Ent-kaurene synthase 1A.
Os10t0413700-01	NAC	OS_LNC0494	Os12t0636400-01	Similar to Epoxide hydrolase 2.
Os01t0730700-01	WRKY	OS_LNC0494	Os12t0636400-01	Similar to Epoxide hydrolase 2.
Os01t0730700-01	WRKY	OS_LNC0494	Os07t0475400-01	Similar to Expansin-like protein A.
Os01t0730700-01	WRKY	OS_LNC0494	Os06t0598800-01	Similar to Fatty acid elongase 1-like protein.
MSTRG.9202.1	HD-ZIP	OS_LNC0494	Os06t0579600-01	Similar to F-box domain containing protein.
MSTRG.9202.1	HD-ZIP	OS_LNC0494	Os08t0120600-01	Similar to Fructose-bisphosphate aldolase, cytoplasmic isozyme.
Os10t0413700-01	NAC	OS_LNC0494	Os01t0118000-01	Similar to Fructose-bisphosphate aldolase.
Os01t0575200-01	bHLH	OS_LNC0494	Os12t0131100-01	Similar to Glucosamine--fructose-6-phosphate aminotransferase [isomerizing].
Os01t0575200-01	bHLH	OS_LNC0494	Os07t0523965-01	Similar to Glucose-6-phosphate/phosphate-translocator precursor.
Os01t0730700-01	WRKY	OS_LNC0494	Os09t0467200-01	Similar to Glutathione S-transferase GST 23.
Os01t0758200-01	Dof	OS_LNC0494	Os10t0530900-01	Similar to Glutathione S-transferase GST 30.
MSTRG.34411.1	NAC	OS_LNC0494	Os10t0530900-01	Similar to Glutathione S-transferase GST 30.
Os01t0758200-01	Dof	OS_LNC0494	Os04t0674000-03	Similar to H0403D02.10 protein.
Os10t0413700-01	NAC	OS_LNC0494	Os11t0156600-00	Similar to H0622F05.7 protein.
Os01t0575200-01	bHLH	OS_LNC0494	Os01t0719700-00	Similar to HCF101
Os10t0413700-01	NAC	OS_LNC0494	Os02t0242900-00	Similar to hydroquinone glucosyltransferase.
MSTRG.34411.1	NAC	OS_LNC0494	Os02t0611800-01	Similar to Hydroxyanthranilate hydroxycinnamoyltransferase 3.
Os10t0413700-01	NAC	OS_LNC0494	Os06t0611100-01	Similar to IQ calmodulin-binding motif family protein.
Os01t0758200-01	Dof	OS_LNC0494	Os11t0552600-01	Similar to Kinesin-like protein.
MSTRG.34411.1	NAC	OS_LNC0494	Os10t0442000-01	Similar to Lectin-like receptor kinase 7
MSTRG.7798.1	CAMTA	OS_LNC0494	Os03t0109300-01	Similar to Lysine decarboxylase-like protein.
Os10t0413700-01	NAC	OS_LNC0494	Os05t0202800-00	Similar to Metallothionein-like protein 3B.
MSTRG.7798.1	CAMTA	OS_LNC0494	Os06t0251000-01	Similar to mitochondrion protein.
Os01t0575200-01	bHLH	OS_LNC0494	Os08t0458200-01	Similar to MTD1.
Os01t0730700-01	WRKY	OS_LNC0494	Os04t0438700-01	Similar to Muscleblind-like protein.
MSTRG.34411.1	NAC	OS_LNC0494	Os06t0637500-02	Similar to MYB transcription factor R2R3 type.
MSTRG.9202.1	HD-ZIP	OS_LNC0494	Os05t0553400-01	Similar to Myb-related transcription factor-like protein.
Os10t0413700-01	NAC	OS_LNC0494	Os12t0610600-01	Similar to NAM / CUC2-like protein.
MSTRG.7798.1	CAMTA	OS_LNC0494	Os06t0267500-01	Similar to NAM1 protein.
MSTRG.7798.1	CAMTA	OS_LNC0494	Os11t0677101-00	Similar to NB-ARC domain containing protein.
MSTRG.34411.1	NAC	OS_LNC0494	Os08t0470200-02	Similar to Nectarin III.
Os10t0413700-01	NAC	OS_LNC0494	Os04t0521700-01	Similar to OSIGBa0131L05.9 protein.
Os10t0413700-01	NAC	OS_LNC0494	Os03t0663500-00	Similar to Osmotin precursor.
Os10t0413700-01	NAC	OS_LNC0494	Os11t0184900-02	Similar to OsNAC5 protein [imported]-rice.
Os01t0575200-01	bHLH	OS_LNC0494	Os07t0663800-01	Similar to Oxidoreductase, short chain dehydrogenase/reductase family protein, expressed.
MSTRG.9202.1	HD-ZIP	OS_LNC0494	Os09t0524500-01	Similar to Oxidoreductase, short chain dehydrogenase/reductase family protein, expressed.
Os01t0575200-01	bHLH	OS_LNC0494	Os01t0962700-01	Similar to Peroxidase 12 precursor.
MSTRG.34411.1	NAC	OS_LNC0494	Os01t0962700-01	Similar to Peroxidase 12 precursor.
MSTRG.34411.1	NAC	OS_LNC0494	Os01t0963000-04	Similar to Peroxidase BP 1 precursor.
MSTRG.9202.1	HD-ZIP	OS_LNC0494	Os05t0427400-00	Similar to Phenylalanine ammonia-lyase.
Os10t0413700-01	NAC	OS_LNC0494	Os09t0513100-02	Similar to Phospholipase A1.
MSTRG.7798.1	CAMTA	OS_LNC0494	Os03t0718800-01	Similar to Physical impedance induced protein.
MSTRG.9202.1	HD-ZIP	OS_LNC0494	Os02t0470400-00	Similar to predicted protein.
Os01t0730700-01	WRKY	OS_LNC0494	Os02t0470400-00	Similar to predicted protein.
Os01t0758200-01	Dof	OS_LNC0494	Os02t0580500-01	Similar to Prohibitin.
Os01t0758200-01	Dof	OS_LNC0494	Os03t0734300-01	Similar to Proteinase inhibitor type II CEVI57 precursor.
MSTRG.7798.1	CAMTA	OS_LNC0494	Os01t0113500-01	Similar to Receptor-like kinase.
Os01t0730700-01	WRKY	OS_LNC0494	Os07t0550900-01	Similar to Receptor-like protein kinase 6.
MSTRG.9202.1	HD-ZIP	OS_LNC0494	Os07t0130200-01	Similar to Resistance protein candidate.
Os01t0758200-01	Dof	OS_LNC0494	Os10t0566400-01	Similar to RING-H2 finger protein ATL3J.
MSTRG.7798.1	CAMTA	OS_LNC0494	Os01t0958500-01	Similar to RNA binding protein-like.
MSTRG.9202.1	HD-ZIP	OS_LNC0494	Os03t0845700-01	Similar to RPB17.
Os10t0413700-01	NAC	OS_LNC0494	Os09t0545500-00	Similar to SAUR55 - auxin-responsive SAUR family member.
MSTRG.34411.1	NAC	OS_LNC0494	Os01t0642801-00	Similar to S-domain class receptor-like kinase3.
Os10t0413700-01	NAC	OS_LNC0494	Os06t0225300-02	Similar to SERK1.
MSTRG.34411.1	NAC	OS_LNC0494	Os02t0562600-01	Similar to Seven trans-membrane protein.
Os01t0758200-01	Dof	OS_LNC0494	Os01t0516600-02	Similar to Stable protein 1.
MSTRG.7798.1	CAMTA	OS_LNC0494	Os03t0741400-01	Similar to SUSIBA2.
MSTRG.9202.1	HD-ZIP	OS_LNC0494	Os06t0166400-01	Similar to TINY-like protein.
MSTRG.7798.1	CAMTA	OS_LNC0494	Os06t0671700-01	Similar to toprim domain-containing protein.
MSTRG.34411.1	NAC	OS_LNC0494	Os07t0108200-00	Similar to transparent testa 12 protein.
MSTRG.9202.1	HD-ZIP	OS_LNC0494	Os08t0562800-01	Similar to Transparent testa 12 protein.
Os10t0413700-01	NAC	OS_LNC0494	Os04t0521900-01	Similar to Vegetative cell wall protein gp1.
Os01t0575200-01	bHLH	OS_LNC0494	Os05t0583000-01	Similar to WRKY8.
Os10t0413700-01	NAC	OS_LNC0494	Os02t0224400-01	Similar to Xaa-Pro dipeptidase.
Os01t0575200-01	bHLH	OS_LNC0494	Os10t0481400-02	Similar to Zinc finger, C3HC4 type family protein, expressed.
Os01t0730700-01	WRKY	OS_LNC0494	Os09t0247700-01	Similar to Zinc finger, ZZ-type
MSTRG.9202.1	HD-ZIP	OS_LNC0494	Os08t0207500-01	Similar to Zinc transporter ZIP1.
MSTRG.34411.1	NAC	OS_LNC0494	Os03t0750700-01	Six-bladed beta-propeller, TolB-like domain containing protein.
MSTRG.9202.1	HD-ZIP	OS_LNC0494	Os07t0655900-01	SNARE associated Golgi protein domain containing protein.
MSTRG.34411.1	NAC	OS_LNC0494	Os08t0260600-01	Tetraspanin domain containing protein.
MSTRG.9202.1	HD-ZIP	OS_LNC0494	Os10t0482900-01	Thioredoxin fold domain containing protein.
Os01t0730700-01	WRKY	OS_LNC0494	Os01t0597800-01	UDP-glucuronosyl/UDP-glucosyltransferase family protein.
MSTRG.34411.1	NAC	OS_LNC0494	Os01t0735900-01	UDP-glucuronosyl/UDP-glucosyltransferase family protein.
Os01t0575200-01	bHLH	OS_LNC0494	Os06t0282000-01	UDP-glucuronosyl/UDP-glucosyltransferase family protein.
MSTRG.9202.1	HD-ZIP	OS_LNC0494	Os04t0488600-01	Uncharacterised protein family Ycf20 domain containing protein.
MSTRG.7798.1	CAMTA	OS_LNC0494	Os03t0320600-01	VQ domain containing protein.
Os01t0575200-01	bHLH	OS_LNC0494	Os06t0530600-00	VQ domain containing protein.
Os01t0575200-01	bHLH	OS_LNC0494	Os09t0370500-00	VQ domain containing protein.
Os01t0730700-01	WRKY	OS_LNC0494	Os09t0417600-02	WRKY transcription factor, Transcriptional repressor, Pathogen defense
Os10t0413700-01	NAC	OS_LNC0494	Os01t0857500-01	Xanthine/uracil/vitamin C permease family protein.
Os01t0758200-01	Dof	OS_LNC0494	Os06t0633500-01	Zinc finger, RING/FYVE/PHD-type domain containing protein.
MSTRG.34411.1	NAC	OS_LNC0494	Os06t0218300-01	Zinc finger, RING-type domain containing protein.
Os03t0215400-01	MIKC_MADS	OS_LNC0510	Os11t0546200-01	Armadillo-like helical domain containing protein.
Os03t0215400-01	MIKC_MADS	OS_LNC0510	Os01t0958800-02	Conserved hypothetical protein.
Os03t0215400-01	MIKC_MADS	OS_LNC0510	Os05t0465000-01	Conserved hypothetical protein.
Os03t0215400-01	MIKC_MADS	OS_LNC0510	Os06t0493100-01	Conserved hypothetical protein.
Os03t0215400-01	MIKC_MADS	OS_LNC0510	Os06t0581701-01	Conserved hypothetical protein.
Os03t0215400-01	MIKC_MADS	OS_LNC0510	Os11t0618500-02	Conserved hypothetical protein.
Os03t0215400-01	MIKC_MADS	OS_LNC0510	Os12t0257500-02	Conserved hypothetical protein.
Os03t0215400-01	MIKC_MADS	OS_LNC0510	Os02t0199200-00	Disease resistance protein domain containing protein.
Os03t0215400-01	MIKC_MADS	OS_LNC0510	Os02t0582600-02	Heavy metal transport/detoxification protein domain containing protein.
Os03t0215400-01	MIKC_MADS	OS_LNC0510	Os11t0278300-00	Hypothetical conserved gene.
Os03t0215400-01	MIKC_MADS	OS_LNC0510	Os08t0191650-01	Hypothetical gene.
Os03t0215400-01	MIKC_MADS	OS_LNC0510	Os02t0255033-00	Hypothetical protein.
Os03t0215400-01	MIKC_MADS	OS_LNC0510	Os04t0432200-00	Hypothetical protein.
Os03t0215400-01	MIKC_MADS	OS_LNC0510	Os07t0521100-01	Leucine-rich repeat, typical subtype containing protein.
Os03t0215400-01	MIKC_MADS	OS_LNC0510	Os03t0327800-01	NAC Family transcriptional activator, Abiotic stress response, Positive regulator of leaf senescence
Os03t0215400-01	MIKC_MADS	OS_LNC0510	Os12t0565100-01	NB-ARC domain containing protein.
Os03t0215400-01	MIKC_MADS	OS_LNC0510	Os06t0705300-01	Pentatricopeptide repeat domain containing protein.
Os03t0215400-01	MIKC_MADS	OS_LNC0510	Os05t0158500-01	Peptidase S10, serine carboxypeptidase family protein.
Os03t0215400-01	MIKC_MADS	OS_LNC0510	Os03t0436400-03	Similar to A.thaliana gene induced upon wounding stress.
Os03t0215400-01	MIKC_MADS	OS_LNC0510	Os01t0654300-01	Similar to ARP2/3 complex 34 kDa subunit.
Os03t0215400-01	MIKC_MADS	OS_LNC0510	Os01t0665300-02	Similar to CTD-phosphatase-like protein.
Os03t0215400-01	MIKC_MADS	OS_LNC0510	Os03t0358100-01	Similar to Glutathione peroxidase.
Os03t0215400-01	MIKC_MADS	OS_LNC0510	Os07t0119000-01	Similar to MAP3K gamma protein kinase.
Os03t0215400-01	MIKC_MADS	OS_LNC0510	Os08t0113000-01	Similar to Peroxidase 47 precursor.
Os03t0215400-01	MIKC_MADS	OS_LNC0510	Os03t0294100-00	Similar to pherophorin like protein.
Os03t0215400-01	MIKC_MADS	OS_LNC0510	Os06t0174300-01	Similar to predicted protein.
Os03t0215400-01	MIKC_MADS	OS_LNC0510	Os05t0182600-01	Similar to SSRP1 protein.
Os03t0215400-01	MIKC_MADS	OS_LNC0510	Os07t0618600-01	Zinc finger, RING/FYVE/PHD-type domain containing protein.
Os11t0490900-01	WRKY	OS_LNC0544	Os04t0690800-01	22-kDa Photosystem II protein, Photoprotection
Os11t0490900-01	WRKY	OS_LNC0544	Os06t0255100-01	2OG-Fe(II) oxygenase domain containing protein.
Os11t0490900-01	WRKY	OS_LNC0544	Os03t0767000-01	Allene oxide synthase, Biosynthesis of jasmonic acid
Os11t0490900-01	WRKY	OS_LNC0544	Os06t0214300-01	Alpha/beta hydrolase fold-3 domain containing protein.
Os11t0490900-01	WRKY	OS_LNC0544	Os02t0654700-01	AP2/ERF family protein, Abiotic stress response
Os11t0490900-01	WRKY	OS_LNC0544	Os01t0214500-01	Conserved hypothetical protein.
Os11t0490900-01	WRKY	OS_LNC0544	Os01t0670500-01	Conserved hypothetical protein.
Os11t0490900-01	WRKY	OS_LNC0544	Os02t0264300-01	Conserved hypothetical protein.
Os11t0490900-01	WRKY	OS_LNC0544	Os02t0690200-01	Conserved hypothetical protein.
Os11t0490900-01	WRKY	OS_LNC0544	Os03t0683700-02	Conserved hypothetical protein.
Os11t0490900-01	WRKY	OS_LNC0544	Os05t0273500-01	Conserved hypothetical protein.
Os11t0490900-01	WRKY	OS_LNC0544	Os05t0520600-01	Conserved hypothetical protein.
Os11t0490900-01	WRKY	OS_LNC0544	Os06t0586000-01	Conserved hypothetical protein.
Os11t0490900-01	WRKY	OS_LNC0544	Os08t0204632-01	Conserved hypothetical protein.
Os11t0490900-01	WRKY	OS_LNC0544	Os06t0501900-01	Cytochrome P450 family protein.
Os11t0490900-01	WRKY	OS_LNC0544	Os10t0513900-01	Cytochrome P450 family protein.
Os11t0490900-01	WRKY	OS_LNC0544	Os02t0580400-01	Dynein light chain, type 1 family protein.
Os11t0490900-01	WRKY	OS_LNC0544	Os07t0535700-01	F-box associated type 1 domain containing protein.
Os11t0490900-01	WRKY	OS_LNC0544	Os08t0461700-01	F-box domain, cyclin-like domain containing protein.
Os11t0490900-01	WRKY	OS_LNC0544	Os01t0692100-01	Glutathione S-transferase, C-terminal-like domain containing protein.
Os11t0490900-01	WRKY	OS_LNC0544	Os03t0124000-01	Homeodomain-related domain containing protein.
Os11t0490900-01	WRKY	OS_LNC0544	Os06t0710001-00	Hypothetical conserved gene.
Os11t0490900-01	WRKY	OS_LNC0544	Os10t0563800-00	Hypothetical conserved gene.
Os11t0490900-01	WRKY	OS_LNC0544	Os11t0600600-01	Hypothetical conserved gene.
Os11t0490900-01	WRKY	OS_LNC0544	Os02t0606800-01	Isochorismatase hydrolase family protein.
Os11t0490900-01	WRKY	OS_LNC0544	Os03t0324600-01	NB-ARC domain containing protein.
Os11t0490900-01	WRKY	OS_LNC0544	Os03t0759500-01	Origin recognition complex 5.
Os11t0490900-01	WRKY	OS_LNC0544	Os03t0317300-01	Peptidase A1 domain containing protein.
Os11t0490900-01	WRKY	OS_LNC0544	Os01t0629600-01	Peptidase S10, serine carboxypeptidase family protein.
Os11t0490900-01	WRKY	OS_LNC0544	Os07t0107300-01	Plant disease resistance response protein family protein.
Os11t0490900-01	WRKY	OS_LNC0544	Os01t0950900-01	Protein of unknown function DUF221 domain containing protein.
Os11t0490900-01	WRKY	OS_LNC0544	Os08t0478466-01	Protein of unknown function DUF296 domain containing protein.
Os11t0490900-01	WRKY	OS_LNC0544	Os07t0516300-01	Protein of unknown function DUF584 family protein.
Os11t0490900-01	WRKY	OS_LNC0544	Os01t0124100-01	Proteinase inhibitor I12, Bowman-Birk family protein.
Os11t0490900-01	WRKY	OS_LNC0544	Os02t0191300-01	Similar to Amino acid transporter-like protein.
Os11t0490900-01	WRKY	OS_LNC0544	Os10t0535900-00	Similar to ATEXPA7.
Os11t0490900-01	WRKY	OS_LNC0544	Os09t0533600-01	Similar to Avr9/Cf-9 induced kinase 1.
Os11t0490900-01	WRKY	OS_LNC0544	Os09t0481400-01	Similar to Caffeoyl-CoA O-methyltransferase.
Os11t0490900-01	WRKY	OS_LNC0544	Os08t0230200-01	Similar to cysteine-type endopeptidase/ ubiquitin thiolesterase.
Os11t0490900-01	WRKY	OS_LNC0544	Os09t0277800-01	Similar to Enoyl-[acyl-carrier-protein] reductase [NADH], chloroplast precursor.
Os11t0490900-01	WRKY	OS_LNC0544	Os02t0763200-01	Similar to Galactoside 2-alpha-L-fucosyltransferase-fucosyltransferase).
Os11t0490900-01	WRKY	OS_LNC0544	Os03t0804500-01	Similar to Germin-like protein subfamily T member 1 precursor.
Os11t0490900-01	WRKY	OS_LNC0544	Os01t0940700-02	Similar to Glucan endo-1,3-beta-glucosidase GII precursor- beta-glucan endohydrolase GII)-beta-glucanase isoenzyme GII).
Os11t0490900-01	WRKY	OS_LNC0544	Os11t0146550-00	Similar to holiday junction resolvase, S1x1p, URI domain nuclease.
Os11t0490900-01	WRKY	OS_LNC0544	Os05t0108300-01	Similar to MAP kinase-like protein.
Os11t0490900-01	WRKY	OS_LNC0544	Os02t0135200-00	Similar to Mitogen-activated protein kinase 13.
Os11t0490900-01	WRKY	OS_LNC0544	Os03t0277600-01	Similar to mRNA sequence.
Os11t0490900-01	WRKY	OS_LNC0544	Os08t0374701-01	Similar to Protein kinase domain containing protein, expressed.
Os11t0490900-01	WRKY	OS_LNC0544	Os01t0323600-01	Similar to S-adenosylmethionine synthase 2.
Os11t0490900-01	WRKY	OS_LNC0544	Os07t0678600-01	Similar to Serine/threonine protein kinase.
Os11t0490900-01	WRKY	OS_LNC0544	Os03t0315400-01	Similar to Typical P-type R2R3 Myb protein.
Os11t0490900-01	WRKY	OS_LNC0544	Os07t0680000-01	Similar to Vacuolar sorting receptor 1 precursor.
Os11t0490900-01	WRKY	OS_LNC0544	Os06t0572400-01	Tetraspanin domain containing protein.
Os11t0490900-01	WRKY	OS_LNC0544	Os10t0576600-01	Tetratricopeptide-like helical domain containing protein.
Os11t0490900-01	WRKY	OS_LNC0544	Os09t0482900-01	UDP-glucuronosyl/UDP-glucosyltransferase family protein.
Os11t0490900-01	WRKY	OS_LNC0544	Os09t0417600-02	WRKY transcription factor, Transcriptional repressor, Pathogen defense
Os11t0490900-01	WRKY	OS_LNC0544	Os09t0434900-02	Zinc finger, RING-type domain containing protein.
Os03t0182800-01	ERF	OS_LNC0574	Os04t0690800-01	22-kDa Photosystem II protein, Photoprotection
MSTRG.14175.1	FAR1	OS_LNC0574	Os01t0830500-01	2OG-Fe(II) oxygenase domain containing protein.
MSTRG.14175.1	FAR1	OS_LNC0574	Os02t0139100-01	Activator of Hsp90 ATPase, N-terminal domain containing protein.
MSTRG.14175.1	FAR1	OS_LNC0574	Os07t0192000-01	ATPase, AAA-type, core domain containing protein.
Os03t0182800-01	ERF	OS_LNC0574	Os07t0198300-01	Bifunctional inhibitor/plant lipid transfer protein/seed storage domain containing protein.
MSTRG.14175.1	FAR1	OS_LNC0574	Os08t0157500-01	Caffeic acid O-methyltransferase, Flavonoid 3'-O-methyltransferase, Melatonin biosynthesis, Tricin biosynthesis
MSTRG.14175.1	FAR1	OS_LNC0574	Os02t0753800-01	Calcium-binding protein, Annexin, Heat and drought stress tolerance
Os03t0182800-01	ERF	OS_LNC0574	Os03t0216700-01	Citrate transporter, Efficient translocation of Fe
Os03t0182800-01	ERF	OS_LNC0574	Os01t0130900-01	Conserved hypothetical protein.
MSTRG.14175.1	FAR1	OS_LNC0574	Os01t0346600-01	Conserved hypothetical protein.
MSTRG.14175.1	FAR1	OS_LNC0574	Os03t0349600-03	Conserved hypothetical protein.
Os03t0182800-01	ERF	OS_LNC0574	Os04t0624900-01	Conserved hypothetical protein.
MSTRG.14175.1	FAR1	OS_LNC0574	Os06t0147400-01	Conserved hypothetical protein.
MSTRG.14175.1	FAR1	OS_LNC0574	Os08t0416800-01	Conserved hypothetical protein.
Os03t0182800-01	ERF	OS_LNC0574	Os10t0432200-01	Conserved hypothetical protein.
MSTRG.14175.1	FAR1	OS_LNC0574	Os10t0491400-01	Conserved hypothetical protein.
Os03t0182800-01	ERF	OS_LNC0574	Os02t0199200-00	Disease resistance protein domain containing protein.
Os03t0182800-01	ERF	OS_LNC0574	Os02t0533000-00	FeS cluster biogenesis domain containing protein.
MSTRG.14175.1	FAR1	OS_LNC0574	Os09t0452900-01	Glycosyl transferase, family 31 protein.
Os03t0182800-01	ERF	OS_LNC0574	Os04t0684100-02	Hypothetical conserved gene.
Os03t0182800-01	ERF	OS_LNC0574	Os08t0522100-00	Hypothetical conserved gene.
MSTRG.14175.1	FAR1	OS_LNC0574	Os01t0848475-00	Hypothetical protein.
Os03t0182800-01	ERF	OS_LNC0574	Os05t0494800-01	Hypothetical protein.
MSTRG.14175.1	FAR1	OS_LNC0574	Os07t0669675-00	Hypothetical protein.
MSTRG.14175.1	FAR1	OS_LNC0574	Os10t0558850-00	Hypothetical protein.
MSTRG.14175.1	FAR1	OS_LNC0574	Os01t0188100-01	Isopenicillin N synthase family protein.
MSTRG.14175.1	FAR1	OS_LNC0574	Os11t0615000-01	LNS2, Lipin/Ned1/Smp2 domain containing protein.
MSTRG.14175.1	FAR1	OS_LNC0574	Os11t0541600-00	Protein of unknown function DUF247, plant domain containing protein.
Os03t0182800-01	ERF	OS_LNC0574	Os04t0504600-01	Pyruvate/Phosphoenolpyruvate kinase, catalytic core domain containing protein.
MSTRG.14175.1	FAR1	OS_LNC0574	Os01t0974900-00	Similar to 26S proteasome non-ATPase regulatory subunit 6.
MSTRG.14175.1	FAR1	OS_LNC0574	Os04t0630800-01	Similar to Anthocyanidin reductase.
Os03t0182800-01	ERF	OS_LNC0574	Os02t0833100-01	Similar to antiporter/ drug transporter.
Os03t0182800-01	ERF	OS_LNC0574	Os01t0808100-01	Similar to BZIP transcription factor.
MSTRG.14175.1	FAR1	OS_LNC0574	Os01t0728300-01	Similar to Cytochrome P450 monooxygenase CYP72A5.
Os03t0182800-01	ERF	OS_LNC0574	Os01t0837200-01	Similar to esterase/lipase/thioesterase family protein.
Os03t0182800-01	ERF	OS_LNC0574	Os07t0405100-01	Similar to F-box-like/WD-repeat protein ebi.
MSTRG.14175.1	FAR1	OS_LNC0574	Os04t0209300-01	Similar to Glutathione-conjugate transporter AtMRP4.
Os03t0182800-01	ERF	OS_LNC0574	Os01t0192500-00	Similar to H0525G02.3 protein.
Os03t0182800-01	ERF	OS_LNC0574	Os04t0666800-01	Similar to H1005F08.21 protein.
MSTRG.14175.1	FAR1	OS_LNC0574	Os01t0719700-00	Similar to HCF101
MSTRG.14175.1	FAR1	OS_LNC0574	Os09t0456800-01	Similar to Heat stress transcription factor Spl7.
MSTRG.14175.1	FAR1	OS_LNC0574	Os06t0591600-01	Similar to Hemoglobin Hb2.
MSTRG.14175.1	FAR1	OS_LNC0574	Os06t0152400-01	Similar to Hexaprenyldihydroxybenzoate methyltransferase, mitochondrial precursor.
MSTRG.14175.1	FAR1	OS_LNC0574	Os08t0331900-01	Similar to Leucine Rich Repeat family protein, expressed.
Os03t0182800-01	ERF	OS_LNC0574	Os01t0521400-01	Similar to lipase family protein.
MSTRG.14175.1	FAR1	OS_LNC0574	Os06t0647400-02	Similar to Lysosomal Pro-X carboxypeptidase.
MSTRG.14175.1	FAR1	OS_LNC0574	Os04t0209200-01	Similar to MRP-like ABC transporter.
MSTRG.14175.1	FAR1	OS_LNC0574	Os03t0689833-00	Similar to NB-ARC domain containing protein, expressed.
Os03t0182800-01	ERF	OS_LNC0574	Os11t0485900-01	Similar to NB-ARC domain containing protein, expressed.
MSTRG.14175.1	FAR1	OS_LNC0574	Os04t0429800-01	Similar to Nicotinate phosphoribosyltransferase-like protein.
Os03t0182800-01	ERF	OS_LNC0574	Os10t0558700-02	Similar to Oxidoreductase, 2OG-Fe oxygenase family protein, expressed.
Os03t0182800-01	ERF	OS_LNC0574	Os07t0512100-01	Similar to protein binding protein.
MSTRG.14175.1	FAR1	OS_LNC0574	Os07t0550900-01	Similar to Receptor-like protein kinase 6.
Os03t0182800-01	ERF	OS_LNC0574	Os01t0631200-01	Similar to siroheme uroporphyrinogen methyltransferase1.
MSTRG.14175.1	FAR1	OS_LNC0574	Os10t0576600-01	Tetratricopeptide-like helical domain containing protein.
Os03t0182800-01	ERF	OS_LNC0574	Os01t0734800-01	UDP-glucuronosyl/UDP-glucosyltransferase family protein.
Os03t0182800-01	ERF	OS_LNC0574	Os09t0482900-01	UDP-glucuronosyl/UDP-glucosyltransferase family protein.
MSTRG.14175.1	FAR1	OS_LNC0574	Os09t0482900-01	UDP-glucuronosyl/UDP-glucosyltransferase family protein.
Os03t0182800-01	ERF	OS_LNC0574	Os09t0363600-01	WD40/YVTN repeat-like domain containing protein.
MSTRG.7798.1	CAMTA	OS_LNC0578	Os01t0728400-01	Conserved hypothetical protein.
MSTRG.7798.1	CAMTA	OS_LNC0578	Os09t0424701-00	Conserved hypothetical protein.
MSTRG.7798.1	CAMTA	OS_LNC0578	Os02t0571900-01	Cytochrome P450 family protein.
MSTRG.7798.1	CAMTA	OS_LNC0578	Os04t0556000-01	Heavy metal P-type ATPase, Xylem loading of copper
MSTRG.7798.1	CAMTA	OS_LNC0578	Os08t0165800-00	Hypothetical protein.
MSTRG.7798.1	CAMTA	OS_LNC0578	Os10t0559300-01	Hypothetical protein.
MSTRG.7798.1	CAMTA	OS_LNC0578	Os09t0371200-01	Major facilitator superfamily protein.
MSTRG.7798.1	CAMTA	OS_LNC0578	Os11t0180000-01	Plant disease resistance response protein family protein.
MSTRG.7798.1	CAMTA	OS_LNC0578	Os01t0743300-01	Protease-associated PA domain containing protein.
MSTRG.7798.1	CAMTA	OS_LNC0578	Os01t0389700-01	Protein of unknown function DUF679 family protein.
MSTRG.7798.1	CAMTA	OS_LNC0578	Os02t0719600-01	SAM dependent carboxyl methyltransferase family protein.
MSTRG.7798.1	CAMTA	OS_LNC0578	Os07t0109300-00	Similar to 36I5.7.
MSTRG.7798.1	CAMTA	OS_LNC0578	Os03t0109300-01	Similar to Lysine decarboxylase-like protein.
MSTRG.7798.1	CAMTA	OS_LNC0578	Os06t0251000-01	Similar to mitochondrion protein.
MSTRG.7798.1	CAMTA	OS_LNC0578	Os06t0267500-01	Similar to NAM1 protein.
MSTRG.7798.1	CAMTA	OS_LNC0578	Os11t0677101-00	Similar to NB-ARC domain containing protein.
MSTRG.7798.1	CAMTA	OS_LNC0578	Os03t0718800-01	Similar to Physical impedance induced protein.
MSTRG.7798.1	CAMTA	OS_LNC0578	Os01t0113500-01	Similar to Receptor-like kinase.
MSTRG.7798.1	CAMTA	OS_LNC0578	Os01t0958500-01	Similar to RNA binding protein-like.
MSTRG.7798.1	CAMTA	OS_LNC0578	Os03t0741400-01	Similar to SUSIBA2.
MSTRG.7798.1	CAMTA	OS_LNC0578	Os06t0671700-01	Similar to toprim domain-containing protein.
MSTRG.7798.1	CAMTA	OS_LNC0578	Os03t0320600-01	VQ domain containing protein.
Os11t0218000-01	bZIP	OS_LNC0654	Os01t0597600-01	Amino acid transporter, transmembrane domain containing protein.
Os11t0218000-01	bZIP	OS_LNC0654	Os06t0228500-01	Amino acid transporter, transmembrane domain containing protein.
Os11t0218000-01	bZIP	OS_LNC0654	Os06t0633800-01	Amino acid transporter, transmembrane domain containing protein.
Os08t0386200-01	WRKY	OS_LNC0654	Os06t0633800-01	Amino acid transporter, transmembrane domain containing protein.
Os11t0218000-01	bZIP	OS_LNC0654	Os02t0114000-01	Bromodomain domain containing protein.
MSTRG.15469.4	MYB_related	OS_LNC0654	Os02t0114000-01	Bromodomain domain containing protein.
Os08t0386200-01	WRKY	OS_LNC0654	Os02t0114000-01	Bromodomain domain containing protein.
Os11t0218000-01	bZIP	OS_LNC0654	Os01t0186600-01	Conserved hypothetical protein.
MSTRG.15469.4	MYB_related	OS_LNC0654	Os01t0186600-01	Conserved hypothetical protein.
MSTRG.15469.4	MYB_related	OS_LNC0654	Os01t0910900-01	Conserved hypothetical protein.
Os08t0386200-01	WRKY	OS_LNC0654	Os01t0910900-01	Conserved hypothetical protein.
Os11t0218000-01	bZIP	OS_LNC0654	Os05t0573000-01	Conserved hypothetical protein.
MSTRG.15469.4	MYB_related	OS_LNC0654	Os05t0573000-01	Conserved hypothetical protein.
Os11t0218000-01	bZIP	OS_LNC0654	Os08t0240200-01	Conserved hypothetical protein.
Os11t0218000-01	bZIP	OS_LNC0654	Os09t0130700-00	Conserved hypothetical protein.
MSTRG.15469.4	MYB_related	OS_LNC0654	Os09t0130700-00	Conserved hypothetical protein.
MSTRG.15469.4	MYB_related	OS_LNC0654	Os12t0257500-02	Conserved hypothetical protein.
Os11t0218000-01	bZIP	OS_LNC0654	Os08t0270200-01	Exosome-associated family protein.
Os08t0386200-01	WRKY	OS_LNC0654	Os08t0270200-01	Exosome-associated family protein.
MSTRG.15469.4	MYB_related	OS_LNC0654	Os10t0531400-01	Glutathione S-transferase GST 30.
Os08t0386200-01	WRKY	OS_LNC0654	Os02t0467700-01	Glycosyl transferase, family 28, C-terminal domain containing protein.
MSTRG.15469.4	MYB_related	OS_LNC0654	Os03t0244000-01	Heat shock protein DnaJ, cysteine-rich region domain containing protein.
Os11t0218000-01	bZIP	OS_LNC0654	Os01t0647200-01	Hypothetical conserved gene.
MSTRG.15469.4	MYB_related	OS_LNC0654	Os01t0647200-01	Hypothetical conserved gene.
Os08t0386200-01	WRKY	OS_LNC0654	Os01t0647200-01	Hypothetical conserved gene.
MSTRG.15469.4	MYB_related	OS_LNC0654	Os03t0431600-00	Hypothetical conserved gene.
Os11t0218000-01	bZIP	OS_LNC0654	Os06t0705400-02	Hypothetical conserved gene.
Os11t0218000-01	bZIP	OS_LNC0654	Os10t0580750-00	Hypothetical gene.
Os11t0218000-01	bZIP	OS_LNC0654	Os02t0179950-00	Hypothetical protein.
Os08t0386200-01	WRKY	OS_LNC0654	Os02t0179950-00	Hypothetical protein.
MSTRG.15469.4	MYB_related	OS_LNC0654	Os02t0749200-01	Hypothetical protein.
Os08t0386200-01	WRKY	OS_LNC0654	Os02t0749200-01	Hypothetical protein.
Os11t0218000-01	bZIP	OS_LNC0654	Os06t0606599-00	Hypothetical protein.
MSTRG.15469.4	MYB_related	OS_LNC0654	Os10t0135100-00	NB-ARC domain containing protein.
Os08t0386200-01	WRKY	OS_LNC0654	Os10t0135100-00	NB-ARC domain containing protein.
MSTRG.15469.4	MYB_related	OS_LNC0654	Os12t0564800-01	NB-ARC domain containing protein.
MSTRG.15469.4	MYB_related	OS_LNC0654	Os10t0180000-01	NpGUT1 homolog.
Os08t0386200-01	WRKY	OS_LNC0654	Os10t0180000-01	NpGUT1 homolog.
Os11t0218000-01	bZIP	OS_LNC0654	Os06t0163500-01	Peptidase S8 and S53, subtilisin, kexin, sedolisin domain containing protein.
Os11t0218000-01	bZIP	OS_LNC0654	Os07t0496700-01	Phosphate-induced protein 1 conserved region family protein.
MSTRG.15469.4	MYB_related	OS_LNC0654	Os09t0415800-01	Phosphofructokinase family protein.
Os08t0386200-01	WRKY	OS_LNC0654	Os09t0415800-01	Phosphofructokinase family protein.
MSTRG.15469.4	MYB_related	OS_LNC0654	Os11t0180000-01	Plant disease resistance response protein family protein.
MSTRG.15469.4	MYB_related	OS_LNC0654	Os04t0409900-01	Plant neutral invertase family protein.
Os11t0218000-01	bZIP	OS_LNC0654	Os05t0467700-01	Protein of unknown function DUF1618 domain containing protein.
MSTRG.15469.4	MYB_related	OS_LNC0654	Os05t0467700-01	Protein of unknown function DUF1618 domain containing protein.
Os11t0218000-01	bZIP	OS_LNC0654	Os04t0585700-01	Protein of unknown function DUF581 family protein.
Os08t0386200-01	WRKY	OS_LNC0654	Os01t0974200-01	RicMT.
MSTRG.15469.4	MYB_related	OS_LNC0654	Os05t0243100-01	Similar to 50S ribosomal protein L13.
Os08t0386200-01	WRKY	OS_LNC0654	Os05t0243100-01	Similar to 50S ribosomal protein L13.
MSTRG.15469.4	MYB_related	OS_LNC0654	Os03t0344100-02	Similar to ASF/SF2-like pre-mRNA splicing factor SRP32''.
MSTRG.15469.4	MYB_related	OS_LNC0654	Os01t0945200-00	Similar to BAT1
Os08t0386200-01	WRKY	OS_LNC0654	Os01t0945200-00	Similar to BAT1
MSTRG.15469.4	MYB_related	OS_LNC0654	Os03t0797300-01	Similar to benzoxazinless1.
Os11t0218000-01	bZIP	OS_LNC0654	Os01t0895600-01	Similar to Calreticulin-3.
MSTRG.15469.4	MYB_related	OS_LNC0654	Os01t0895600-01	Similar to Calreticulin-3.
Os11t0218000-01	bZIP	OS_LNC0654	Os04t0675400-01	Similar to Chaperone protein dnaJ.
Os11t0218000-01	bZIP	OS_LNC0654	Os01t0254100-01	Similar to CTV.2.
MSTRG.15469.4	MYB_related	OS_LNC0654	Os02t0561900-00	Similar to E3 ubiquitin-protein ligase EL5.
Os11t0218000-01	bZIP	OS_LNC0654	Os01t0151500-00	Similar to GGT4
Os08t0386200-01	WRKY	OS_LNC0654	Os01t0151500-00	Similar to GGT4
Os11t0218000-01	bZIP	OS_LNC0654	Os08t0525800-00	Similar to glucan endo-1,3-beta-glucosidase A6.
Os08t0386200-01	WRKY	OS_LNC0654	Os08t0525800-00	Similar to glucan endo-1,3-beta-glucosidase A6.
MSTRG.15469.4	MYB_related	OS_LNC0654	Os03t0786000-01	Similar to Glycine-rich protein.
MSTRG.15469.4	MYB_related	OS_LNC0654	Os04t0578600-01	Similar to H0404F02.15 protein.
Os08t0386200-01	WRKY	OS_LNC0654	Os04t0578600-01	Similar to H0404F02.15 protein.
Os11t0218000-01	bZIP	OS_LNC0654	Os07t0596600-02	Similar to IBS1
MSTRG.15469.4	MYB_related	OS_LNC0654	Os07t0596600-02	Similar to IBS1
Os08t0386200-01	WRKY	OS_LNC0654	Os07t0596600-02	Similar to IBS1
MSTRG.15469.4	MYB_related	OS_LNC0654	Os04t0620600-01	Similar to NOI protein.
MSTRG.15469.4	MYB_related	OS_LNC0654	Os06t0608000-01	Similar to PGPS/D10.
Os11t0218000-01	bZIP	OS_LNC0654	Os03t0299900-01	Similar to Plastid aminotransferase.
Os11t0218000-01	bZIP	OS_LNC0654	Os01t0916200-02	Similar to predicted protein.
Os08t0386200-01	WRKY	OS_LNC0654	Os01t0916200-02	Similar to predicted protein.
Os08t0386200-01	WRKY	OS_LNC0654	Os07t0438550-01	Similar to salt-inducible protein kinase.
MSTRG.15469.4	MYB_related	OS_LNC0654	Os12t0543600-00	Similar to sarcosine oxidase.
MSTRG.15469.4	MYB_related	OS_LNC0654	Os11t0134300-01	Similar to Serine/threonine kinase.
Os11t0218000-01	bZIP	OS_LNC0654	Os03t0231700-02	Similar to squalene monooxygenase.
Os08t0386200-01	WRKY	OS_LNC0654	Os03t0231700-02	Similar to squalene monooxygenase.
Os11t0218000-01	bZIP	OS_LNC0654	Os04t0551800-01	Similar to T-complex protein 1, alpha subunit.
MSTRG.15469.4	MYB_related	OS_LNC0654	Os04t0551800-01	Similar to T-complex protein 1, alpha subunit.
Os08t0386200-01	WRKY	OS_LNC0654	Os04t0551800-01	Similar to T-complex protein 1, alpha subunit.
Os11t0218000-01	bZIP	OS_LNC0654	Os02t0661100-01	Similar to Trehalose-6-phosphate phosphatase.
Os11t0218000-01	bZIP	OS_LNC0654	Os11t0497000-01	Similar to Ubiquitin activating enzyme-like protein.
Os11t0218000-01	bZIP	OS_LNC0654	Os03t0792500-01	Similar to Zinc finger POZ domain protein.
MSTRG.15469.4	MYB_related	OS_LNC0654	Os03t0792500-01	Similar to Zinc finger POZ domain protein.
Os08t0386200-01	WRKY	OS_LNC0654	Os03t0792500-01	Similar to Zinc finger POZ domain protein.
MSTRG.15469.4	MYB_related	OS_LNC0654	Os03t0307400-01	Six-bladed beta-propeller, TolB-like domain containing protein.
MSTRG.15469.4	MYB_related	OS_LNC0654	Os03t0193700-00	Terpenoid cylases/protein prenyltransferase alpha-alpha toroid domain containing protein.
Os11t0218000-01	bZIP	OS_LNC0654	Os06t0606700-00	Tetratricopeptide-like helical domain containing protein.
MSTRG.15469.4	MYB_related	OS_LNC0654	Os05t0485300-01	TRAM, LAG1 and CLN8 homology domain containing protein.
Os11t0218000-01	bZIP	OS_LNC0654	Os02t0759400-01	Zinc finger, RING/FYVE/PHD-type domain containing protein.
Os03t0306700-01	bZIP	OS_LNC0971	Os04t0466600-01	Agmatine deiminase domain containing protein.
Os03t0306700-01	bZIP	OS_LNC0971	Os02t0125300-01	Bax inhibitor-1.
Os03t0306700-01	bZIP	OS_LNC0971	Os03t0170100-00	Conserved hypothetical protein.
Os03t0306700-01	bZIP	OS_LNC0971	Os08t0516600-01	Conserved hypothetical protein.
Os03t0306700-01	bZIP	OS_LNC0971	Os08t0524501-00	Conserved hypothetical protein.
Os03t0306700-01	bZIP	OS_LNC0971	Os09t0272600-01	Conserved hypothetical protein.
Os03t0306700-01	bZIP	OS_LNC0971	Os10t0106550-00	Conserved hypothetical protein.
Os03t0306700-01	bZIP	OS_LNC0971	Os05t0529200-02	Crotonase, core domain containing protein.
Os03t0306700-01	bZIP	OS_LNC0971	Os02t0134200-01	DUF1645 family protein, Regulation of stress-tolerance and grain length
Os03t0306700-01	bZIP	OS_LNC0971	Os01t0949300-01	EF-Hand type domain containing protein.
Os03t0306700-01	bZIP	OS_LNC0971	Os04t0679967-01	Hypothetical gene.
Os03t0306700-01	bZIP	OS_LNC0971	Os08t0180000-02	mRNA capping enzyme, large subunit family protein.
Os03t0306700-01	bZIP	OS_LNC0971	Os01t0937400-02	NB-ARC domain containing protein.
Os03t0306700-01	bZIP	OS_LNC0971	Os05t0414300-01	NB-ARC domain containing protein.
Os03t0306700-01	bZIP	OS_LNC0971	Os01t0846000-01	Nucleic acid-binding, OB-fold domain containing protein.
Os03t0306700-01	bZIP	OS_LNC0971	Os02t0180100-01	Peptidase C12, ubiquitin carboxyl-terminal hydrolase 1 family protein.
Os03t0306700-01	bZIP	OS_LNC0971	Os07t0249900-01	Peptidase M20 family protein.
Os03t0306700-01	bZIP	OS_LNC0971	Os03t0180100-01	Protein of unknown function DUF1677, plant domain containing protein.
Os03t0306700-01	bZIP	OS_LNC0971	Os03t0565300-01	Protein of unknown function DUF1723 domain containing protein.
Os03t0306700-01	bZIP	OS_LNC0971	Os10t0407100-01	Ribosomal protein L32p domain containing protein.
Os03t0306700-01	bZIP	OS_LNC0971	Os11t0170000-01	Similar to Amidase family protein, expressed.
Os03t0306700-01	bZIP	OS_LNC0971	Os01t0714600-01	Similar to cDNA clone:J023088C01, full insert sequence.
Os03t0306700-01	bZIP	OS_LNC0971	Os08t0447000-01	Similar to D-3-phosphoglycerate dehydrogenase.
Os03t0306700-01	bZIP	OS_LNC0971	Os01t0692000-01	Similar to Glutathione S-transferase GSTU6.
Os03t0306700-01	bZIP	OS_LNC0971	Os04t0690900-01	Similar to H0323C08.15 protein.
Os03t0306700-01	bZIP	OS_LNC0971	Os02t0537400-01	Similar to Heat shock protein.
Os03t0306700-01	bZIP	OS_LNC0971	Os05t0575000-01	Similar to predicted protein.
Os03t0306700-01	bZIP	OS_LNC0971	Os01t0881500-02	Similar to Scarecrow-like 1.
Os03t0306700-01	bZIP	OS_LNC0971	Os04t0434800-02	Similar to Thylakoid-bound ascorbate peroxidase.
Os03t0306700-01	bZIP	OS_LNC0971	Os01t0778700-01	Similar to Transmembrane protein 49.
Os03t0306700-01	bZIP	OS_LNC0971	Os08t0562800-01	Similar to Transparent testa 12 protein.
Os03t0306700-01	bZIP	OS_LNC0971	Os07t0432800-01	Similar to Typical P-type R2R3 Myb protein.
Os03t0306700-01	bZIP	OS_LNC0971	Os07t0686300-01	Zinc finger, RING/FYVE/PHD-type domain containing protein.
Os03t0182800-01	ERF	OS_LNC1097	Os04t0690800-01	22-kDa Photosystem II protein, Photoprotection
Os12t0124500-01	ZF-HD	OS_LNC1097	Os04t0690800-01	22-kDa Photosystem II protein, Photoprotection
MSTRG.24007.1	HSF	OS_LNC1097	Os03t0856000-01	2OG-Fe(II) oxygenase domain containing protein.
Os05t0114700-02	MYB_related	OS_LNC1097	Os06t0677400-01	3-hydroxyisobutyrate dehydrogenase domain containing protein.
MSTRG.1373.1	WRKY	OS_LNC1097	Os06t0133900-01	5-enolpyruvylshikimate-3-phosphate synthase
Os05t0114700-02	MYB_related	OS_LNC1097	Os04t0640500-01	ABC-1 domain containing protein.
Os12t0573200-01	GRAS	OS_LNC1097	Os03t0790500-01	Alpha/beta hydrolase fold-3 domain containing protein.
Os05t0114700-02	MYB_related	OS_LNC1097	Os01t0884400-01	Armadillo domain containing protein.
Os12t0573200-01	GRAS	OS_LNC1097	Os08t0379200-01	ATPase, P-type, K/Mg/Cd/Cu/Zn/Na/Ca/Na/H-transporter family protein.
MSTRG.24007.1	HSF	OS_LNC1097	Os06t0714300-01	Auxin responsive SAUR protein family protein.
Os12t0124500-01	ZF-HD	OS_LNC1097	Os01t0588400-01	Band 7 protein family protein.
MSTRG.16914.2	WRKY	OS_LNC1097	Os02t0673500-01	Basic helix-loop-helix dimerisation region bHLH domain containing protein.
Os03t0182800-01	ERF	OS_LNC1097	Os07t0198300-01	Bifunctional inhibitor/plant lipid transfer protein/seed storage domain containing protein.
MSTRG.16914.2	WRKY	OS_LNC1097	Os02t0766700-01	bZIP transcription factor, Regulation of ABA signaling and biosynthesis, Drought resistance
MSTRG.24007.1	HSF	OS_LNC1097	Os02t0753800-01	Calcium-binding protein, Annexin, Heat and drought stress tolerance
Os12t0573200-01	GRAS	OS_LNC1097	Os03t0688300-01	Calcium-dependent protein kinase, Positive regulator of drought stress tolerance and spikelet fertility
MSTRG.16914.2	WRKY	OS_LNC1097	Os06t0644100-01	Carbohydrate-binding-like fold domain containing protein.
MSTRG.16914.2	WRKY	OS_LNC1097	Os09t0478100-01	Cellulose synthase family protein.
Os03t0182800-01	ERF	OS_LNC1097	Os03t0216700-01	Citrate transporter, Efficient translocation of Fe
MSTRG.1373.1	WRKY	OS_LNC1097	Os03t0216700-01	Citrate transporter, Efficient translocation of Fe
Os02t0673700-01	Dof	OS_LNC1097	Os02t0124700-01	Clathrin, heavy chain/VPS, 7-fold repeat domain containing protein.
MSTRG.1373.1	WRKY	OS_LNC1097	Os02t0667000-01	Complex 1 LYR protein family protein.
Os05t0114700-02	MYB_related	OS_LNC1097	Os11t0661800-01	Concanavalin A-like lectin/glucanase domain containing protein.
Os03t0182800-01	ERF	OS_LNC1097	Os01t0130900-01	Conserved hypothetical protein.
Os05t0114700-02	MYB_related	OS_LNC1097	Os01t0688000-01	Conserved hypothetical protein.
Os12t0124500-01	ZF-HD	OS_LNC1097	Os01t0721100-01	Conserved hypothetical protein.
MSTRG.16914.2	WRKY	OS_LNC1097	Os01t0766300-00	Conserved hypothetical protein.
MSTRG.16914.2	WRKY	OS_LNC1097	Os01t0768100-01	Conserved hypothetical protein.
MSTRG.24007.1	HSF	OS_LNC1097	Os01t0833400-02	Conserved hypothetical protein.
Os12t0573200-01	GRAS	OS_LNC1097	Os03t0351700-01	Conserved hypothetical protein.
MSTRG.1373.1	WRKY	OS_LNC1097	Os03t0351700-01	Conserved hypothetical protein.
Os12t0124500-01	ZF-HD	OS_LNC1097	Os03t0432900-01	Conserved hypothetical protein.
MSTRG.16914.2	WRKY	OS_LNC1097	Os04t0559550-00	Conserved hypothetical protein.
Os03t0182800-01	ERF	OS_LNC1097	Os04t0624900-01	Conserved hypothetical protein.
Os12t0573200-01	GRAS	OS_LNC1097	Os05t0349400-01	Conserved hypothetical protein.
Os05t0114700-02	MYB_related	OS_LNC1097	Os06t0147400-01	Conserved hypothetical protein.
Os12t0124500-01	ZF-HD	OS_LNC1097	Os06t0487620-01	Conserved hypothetical protein.
Os02t0673700-01	Dof	OS_LNC1097	Os06t0493100-01	Conserved hypothetical protein.
Os05t0114700-02	MYB_related	OS_LNC1097	Os06t0609800-01	Conserved hypothetical protein.
MSTRG.1373.1	WRKY	OS_LNC1097	Os06t0711200-01	Conserved hypothetical protein.
Os12t0124500-01	ZF-HD	OS_LNC1097	Os07t0142100-00	Conserved hypothetical protein.
Os05t0114700-02	MYB_related	OS_LNC1097	Os07t0638000-01	Conserved hypothetical protein.
Os12t0124500-01	ZF-HD	OS_LNC1097	Os07t0648300-01	Conserved hypothetical protein.
Os05t0114700-02	MYB_related	OS_LNC1097	Os08t0170800-01	Conserved hypothetical protein.
Os12t0573200-01	GRAS	OS_LNC1097	Os09t0120100-00	Conserved hypothetical protein.
Os03t0182800-01	ERF	OS_LNC1097	Os10t0432200-01	Conserved hypothetical protein.
MSTRG.1373.1	WRKY	OS_LNC1097	Os10t0491450-00	Conserved hypothetical protein.
MSTRG.1373.1	WRKY	OS_LNC1097	Os12t0516000-00	Conserved hypothetical protein.
MSTRG.24007.1	HSF	OS_LNC1097	Os03t0638900-01	Cyclin-like F-box domain containing protein.
Os05t0114700-02	MYB_related	OS_LNC1097	Os07t0196300-01	Cyclin-like F-box domain containing protein.
Os12t0124500-01	ZF-HD	OS_LNC1097	Os07t0196300-01	Cyclin-like F-box domain containing protein.
MSTRG.1373.1	WRKY	OS_LNC1097	Os06t0501900-01	Cytochrome P450 family protein.
Os12t0124500-01	ZF-HD	OS_LNC1097	Os06t0599200-01	Cytochrome P450 family protein.
MSTRG.24007.1	HSF	OS_LNC1097	Os03t0328000-01	Dedicator of cytokinesis family protein.
Os03t0182800-01	ERF	OS_LNC1097	Os02t0199200-00	Disease resistance protein domain containing protein.
Os12t0573200-01	GRAS	OS_LNC1097	Os10t0394400-01	Disease resistance protein domain containing protein.
Os05t0114700-02	MYB_related	OS_LNC1097	Os10t0394400-01	Disease resistance protein domain containing protein.
MSTRG.1373.1	WRKY	OS_LNC1097	Os10t0394400-01	Disease resistance protein domain containing protein.
Os12t0124500-01	ZF-HD	OS_LNC1097	Os11t0117500-01	DNA-binding WRKY domain containing protein.
Os05t0114700-02	MYB_related	OS_LNC1097	Os12t0538300-01	Dor1-like protein family protein.
Os12t0124500-01	ZF-HD	OS_LNC1097	Os01t0949300-01	EF-Hand type domain containing protein.
Os12t0573200-01	GRAS	OS_LNC1097	Os06t0694200-01	Esterase, SGNH hydrolase-type domain containing protein.
MSTRG.24007.1	HSF	OS_LNC1097	Os05t0369300-01	Exo70 exocyst complex subunit domain containing protein.
Os03t0182800-01	ERF	OS_LNC1097	Os02t0533000-00	FeS cluster biogenesis domain containing protein.
MSTRG.24007.1	HSF	OS_LNC1097	Os02t0139300-01	Glycoside hydrolase, family 17 protein.
Os12t0573200-01	GRAS	OS_LNC1097	Os11t0124900-01	Glycosyl transferase, family 8 protein.
MSTRG.16914.2	WRKY	OS_LNC1097	Os03t0659300-01	Glyoxalase/bleomycin resistance protein/dioxygenase domain containing protein.
Os12t0573200-01	GRAS	OS_LNC1097	Os03t0737300-01	HAD-superfamily phosphatase, subfamily IIIC domain containing protein.
Os12t0573200-01	GRAS	OS_LNC1097	Os04t0685400-02	Harpin-induced 1 domain containing protein.
Os05t0114700-02	MYB_related	OS_LNC1097	Os02t0582600-02	Heavy metal transport/detoxification protein domain containing protein.
MSTRG.1373.1	WRKY	OS_LNC1097	Os06t0670300-01	Homeodomain-like containing protein.
Os12t0124500-01	ZF-HD	OS_LNC1097	Os03t0124000-01	Homeodomain-related domain containing protein.
Os12t0124500-01	ZF-HD	OS_LNC1097	Os04t0600200-01	Homodimeric diiron-carboxylate protein, Cyanide-resistant respiration in mitochondria, Reactive oxygen species scavenging
Os12t0573200-01	GRAS	OS_LNC1097	Os07t0274700-01	HvB12D protein.
MSTRG.24007.1	HSF	OS_LNC1097	Os01t0124650-02	Hypothetical conserved gene.
MSTRG.16914.2	WRKY	OS_LNC1097	Os01t0681600-02	Hypothetical conserved gene.
Os12t0573200-01	GRAS	OS_LNC1097	Os01t0742766-01	Hypothetical conserved gene.
MSTRG.1373.1	WRKY	OS_LNC1097	Os02t0156600-00	Hypothetical conserved gene.
Os02t0673700-01	Dof	OS_LNC1097	Os03t0800900-01	Hypothetical conserved gene.
Os03t0182800-01	ERF	OS_LNC1097	Os04t0684100-02	Hypothetical conserved gene.
Os02t0673700-01	Dof	OS_LNC1097	Os05t0297850-01	Hypothetical conserved gene.
Os12t0124500-01	ZF-HD	OS_LNC1097	Os05t0297850-01	Hypothetical conserved gene.
MSTRG.16914.2	WRKY	OS_LNC1097	Os06t0499100-00	Hypothetical conserved gene.
Os05t0114700-02	MYB_related	OS_LNC1097	Os08t0165601-00	Hypothetical conserved gene.
Os12t0573200-01	GRAS	OS_LNC1097	Os08t0355500-03	Hypothetical conserved gene.
Os03t0182800-01	ERF	OS_LNC1097	Os08t0522100-00	Hypothetical conserved gene.
MSTRG.16914.2	WRKY	OS_LNC1097	Os10t0563800-00	Hypothetical conserved gene.
MSTRG.24007.1	HSF	OS_LNC1097	Os11t0213900-01	Hypothetical conserved gene.
Os05t0114700-02	MYB_related	OS_LNC1097	Os11t0551900-01	Hypothetical conserved gene.
MSTRG.16914.2	WRKY	OS_LNC1097	Os02t0593550-00	Hypothetical gene.
Os05t0114700-02	MYB_related	OS_LNC1097	Os06t0264432-00	Hypothetical gene.
MSTRG.24007.1	HSF	OS_LNC1097	Os06t0487380-01	Hypothetical gene.
Os12t0573200-01	GRAS	OS_LNC1097	Os09t0100750-01	Hypothetical gene.
Os12t0573200-01	GRAS	OS_LNC1097	Os09t0397800-01	Hypothetical gene.
MSTRG.16914.2	WRKY	OS_LNC1097	Os09t0397800-01	Hypothetical gene.
MSTRG.16914.2	WRKY	OS_LNC1097	Os11t0697600-00	Hypothetical gene.
Os05t0114700-02	MYB_related	OS_LNC1097	Os02t0166600-01	Hypothetical protein.
MSTRG.16914.2	WRKY	OS_LNC1097	Os02t0181200-00	Hypothetical protein.
Os12t0573200-01	GRAS	OS_LNC1097	Os03t0237201-00	Hypothetical protein.
MSTRG.24007.1	HSF	OS_LNC1097	Os04t0495900-01	Hypothetical protein.
Os12t0124500-01	ZF-HD	OS_LNC1097	Os04t0615200-01	Hypothetical protein.
Os03t0182800-01	ERF	OS_LNC1097	Os05t0494800-01	Hypothetical protein.
MSTRG.1373.1	WRKY	OS_LNC1097	Os07t0503200-03	Hypothetical protein.
MSTRG.24007.1	HSF	OS_LNC1097	Os07t0660466-00	Hypothetical protein.
Os12t0573200-01	GRAS	OS_LNC1097	Os10t0456000-01	Hypothetical protein.
MSTRG.24007.1	HSF	OS_LNC1097	Os10t0456000-01	Hypothetical protein.
Os12t0124500-01	ZF-HD	OS_LNC1097	Os10t0486916-00	Hypothetical protein.
MSTRG.24007.1	HSF	OS_LNC1097	Os02t0592400-01	Hypoxia induced protein conserved region family protein.
MSTRG.1373.1	WRKY	OS_LNC1097	Os02t0606800-01	Isochorismatase hydrolase family protein.
Os12t0124500-01	ZF-HD	OS_LNC1097	Os02t0606800-01	Isochorismatase hydrolase family protein.
Os12t0124500-01	ZF-HD	OS_LNC1097	Os01t0314800-01	Late embryogenesis abundant protein 3 family protein.
Os12t0124500-01	ZF-HD	OS_LNC1097	Os04t0371600-01	Leucine-rich repeat, cysteine-containing containing protein.
Os12t0124500-01	ZF-HD	OS_LNC1097	Os01t0305200-01	Lg106-like family protein.
MSTRG.1373.1	WRKY	OS_LNC1097	Os06t0179900-01	Major facilitator superfamily protein.
MSTRG.24007.1	HSF	OS_LNC1097	Os09t0533300-01	Metallophosphoesterase domain containing protein.
MSTRG.1373.1	WRKY	OS_LNC1097	Os01t0149800-01	Metallothionein-like protein type 2.
MSTRG.16914.2	WRKY	OS_LNC1097	Os01t0937400-02	NB-ARC domain containing protein.
Os12t0124500-01	ZF-HD	OS_LNC1097	Os01t0937400-02	NB-ARC domain containing protein.
Os12t0124500-01	ZF-HD	OS_LNC1097	Os04t0112100-01	NB-ARC domain containing protein.
MSTRG.24007.1	HSF	OS_LNC1097	Os07t0129200-01	Pathogenesis-related 1a protein, Regulation of abiotic stress responses
MSTRG.24007.1	HSF	OS_LNC1097	Os03t0300400-01	Pathogen-related protein.
MSTRG.1373.1	WRKY	OS_LNC1097	Os01t0170800-01	Pentatricopeptide repeat domain containing protein.
Os12t0573200-01	GRAS	OS_LNC1097	Os09t0482500-01	Peptidase A1 domain containing protein.
MSTRG.24007.1	HSF	OS_LNC1097	Os09t0482500-01	Peptidase A1 domain containing protein.
Os05t0114700-02	MYB_related	OS_LNC1097	Os05t0158500-01	Peptidase S10, serine carboxypeptidase family protein.
Os05t0114700-02	MYB_related	OS_LNC1097	Os11t0432900-01	Peptidase S10, serine carboxypeptidase family protein.
Os12t0124500-01	ZF-HD	OS_LNC1097	Os07t0677100-01	Peroxidase.
Os12t0573200-01	GRAS	OS_LNC1097	Os05t0593000-01	Phospholipase A2, active site domain containing protein.
MSTRG.24007.1	HSF	OS_LNC1097	Os03t0326000-01	Phospholipid-transporting ATPase 1.
Os12t0124500-01	ZF-HD	OS_LNC1097	Os02t0439700-01	Plant specific eukaryotic initiation factor 4B family protein.
MSTRG.1373.1	WRKY	OS_LNC1097	Os07t0526400-01	Polyketide synthase, type III domain containing protein.
Os12t0124500-01	ZF-HD	OS_LNC1097	Os04t0406600-01	Prephenate dehydratase domain containing protein.
Os12t0573200-01	GRAS	OS_LNC1097	Os02t0153900-01	Protein kinase, core domain containing protein.
MSTRG.24007.1	HSF	OS_LNC1097	Os10t0508600-01	Protein of unknown function DUF1352 domain containing protein.
MSTRG.16914.2	WRKY	OS_LNC1097	Os06t0545900-01	Protein of unknown function DUF246, plant family protein.
MSTRG.1373.1	WRKY	OS_LNC1097	Os01t0562600-01	Protein of unknown function DUF247, plant domain containing protein.
MSTRG.16914.2	WRKY	OS_LNC1097	Os02t0614500-01	Protein of unknown function DUF250 domain containing protein.
Os12t0124500-01	ZF-HD	OS_LNC1097	Os05t0112800-01	Protein of unknown function DUF26 domain containing protein.
MSTRG.24007.1	HSF	OS_LNC1097	Os09t0500900-01	Protein of unknown function DUF568 domain containing protein.
MSTRG.1373.1	WRKY	OS_LNC1097	Os09t0325700-01	Protein phosphatase 2C, Abiotic stress response, Early panicle development
Os03t0182800-01	ERF	OS_LNC1097	Os04t0504600-01	Pyruvate/Phosphoenolpyruvate kinase, catalytic core domain containing protein.
Os02t0673700-01	Dof	OS_LNC1097	Os01t0908100-01	RabGAP/TBC domain containing protein.
Os12t0124500-01	ZF-HD	OS_LNC1097	Os02t0560600-01	RING-H2 type E3 ubiquitin ligase, Root development, Maintenance of cell viability after the initiation of root primordial formation, Defense response
Os02t0673700-01	Dof	OS_LNC1097	Os04t0509400-01	RmlC-like jelly roll fold domain containing protein.
MSTRG.1373.1	WRKY	OS_LNC1097	Os03t0130900-02	Serine/threonine protein kinase domain containing protein.
Os12t0573200-01	GRAS	OS_LNC1097	Os11t0690066-00	Serine/threonine protein kinase domain containing protein.
MSTRG.24007.1	HSF	OS_LNC1097	Os03t0379500-01	Similar to 40S ribosomal protein S9.
Os05t0114700-02	MYB_related	OS_LNC1097	Os03t0379500-01	Similar to 40S ribosomal protein S9.
MSTRG.24007.1	HSF	OS_LNC1097	Os03t0152400-01	Similar to 4-coumarate--CoA ligase-like 1.
Os12t0573200-01	GRAS	OS_LNC1097	Os02t0235600-01	Similar to 60S ribosomal protein L11-2. Splice isoform 2.
Os12t0124500-01	ZF-HD	OS_LNC1097	Os04t0504000-01	Similar to Adenine phosphoribosyltransferase form 2.
Os12t0124500-01	ZF-HD	OS_LNC1097	Os02t0302200-01	Similar to aminotransferase family protein.
Os12t0573200-01	GRAS	OS_LNC1097	Os03t0718000-01	Similar to Anthranilate synthase beta chain.
Os03t0182800-01	ERF	OS_LNC1097	Os02t0833100-01	Similar to antiporter/ drug transporter.
Os05t0114700-02	MYB_related	OS_LNC1097	Os10t0535900-00	Similar to ATEXPA7.
MSTRG.16914.2	WRKY	OS_LNC1097	Os04t0690600-01	Similar to Auxin response factor 13.
Os05t0114700-02	MYB_related	OS_LNC1097	Os08t0563300-01	Similar to Bet1-like SNARE 1-1.
Os03t0182800-01	ERF	OS_LNC1097	Os01t0808100-01	Similar to BZIP transcription factor.
Os05t0114700-02	MYB_related	OS_LNC1097	Os05t0593900-01	Similar to C13 endopeptidase NP1 precursor.
Os12t0124500-01	ZF-HD	OS_LNC1097	Os10t0568900-01	Similar to Catalytic/ hydrolase.
MSTRG.16914.2	WRKY	OS_LNC1097	Os01t0233900-01	Similar to cDNA clone:J013003E06, full insert sequence.
Os12t0573200-01	GRAS	OS_LNC1097	Os06t0726200-02	Similar to Chitinase 1.
Os12t0124500-01	ZF-HD	OS_LNC1097	Os06t0726200-02	Similar to Chitinase 1.
MSTRG.24007.1	HSF	OS_LNC1097	Os01t0969000-01	Similar to Chloroplast outer envelope 24 kD protein.
Os12t0124500-01	ZF-HD	OS_LNC1097	Os12t0170800-01	Similar to Citrate binding protein precursor.
MSTRG.24007.1	HSF	OS_LNC1097	Os02t0761100-01	Similar to Cyclophilin-40.
Os12t0124500-01	ZF-HD	OS_LNC1097	Os05t0494200-02	Similar to Cystatin.
MSTRG.24007.1	HSF	OS_LNC1097	Os03t0370900-02	Similar to Cytochrome P450.
Os05t0114700-02	MYB_related	OS_LNC1097	Os02t0742500-01	Similar to DEGP9
Os05t0114700-02	MYB_related	OS_LNC1097	Os06t0499900-01	Similar to Dihydrolipoamide acetyltransferase subunit of PDC.
Os03t0182800-01	ERF	OS_LNC1097	Os01t0837200-01	Similar to esterase/lipase/thioesterase family protein.
MSTRG.1373.1	WRKY	OS_LNC1097	Os08t0559000-01	Similar to F1F0-ATPase inhibitor protein.
Os03t0182800-01	ERF	OS_LNC1097	Os07t0405100-01	Similar to F-box-like/WD-repeat protein ebi.
Os05t0114700-02	MYB_related	OS_LNC1097	Os08t0272000-01	Similar to GAG1At protein.
MSTRG.1373.1	WRKY	OS_LNC1097	Os02t0763200-01	Similar to Galactoside 2-alpha-L-fucosyltransferase-fucosyltransferase).
MSTRG.24007.1	HSF	OS_LNC1097	Os01t0949750-00	Similar to Glutathione S-transferase GST 28.
Os12t0124500-01	ZF-HD	OS_LNC1097	Os01t0949750-00	Similar to Glutathione S-transferase GST 28.
Os12t0573200-01	GRAS	OS_LNC1097	Os10t0528100-01	Similar to Glutathione S-transferase GST 42.
MSTRG.24007.1	HSF	OS_LNC1097	Os10t0528100-01	Similar to Glutathione S-transferase GST 42.
Os12t0124500-01	ZF-HD	OS_LNC1097	Os10t0525400-01	Similar to Glutathione S-transferase GSTU31.
Os12t0573200-01	GRAS	OS_LNC1097	Os06t0667600-01	Similar to Glycine decarboxylase complex H-protein.
Os12t0124500-01	ZF-HD	OS_LNC1097	Os04t0407500-00	Similar to H0321H01.2 protein.
Os03t0182800-01	ERF	OS_LNC1097	Os01t0192500-00	Similar to H0525G02.3 protein.
Os12t0573200-01	GRAS	OS_LNC1097	Os01t0192500-00	Similar to H0525G02.3 protein.
MSTRG.1373.1	WRKY	OS_LNC1097	Os02t0536500-01	Similar to H0622F05.5 protein.
Os03t0182800-01	ERF	OS_LNC1097	Os04t0666800-01	Similar to H1005F08.21 protein.
Os12t0573200-01	GRAS	OS_LNC1097	Os12t0639600-02	Similar to Hedgehog-interacting-like protein.
Os05t0114700-02	MYB_related	OS_LNC1097	Os03t0101300-01	Similar to Hexose transporter.
MSTRG.24007.1	HSF	OS_LNC1097	Os02t0611800-01	Similar to Hydroxyanthranilate hydroxycinnamoyltransferase 3.
MSTRG.1373.1	WRKY	OS_LNC1097	Os01t0841700-01	Similar to Isoform ERG1b of Elicitor-responsive protein 1.
MSTRG.24007.1	HSF	OS_LNC1097	Os05t0496500-01	Similar to Latex-abundant protein.
MSTRG.16914.2	WRKY	OS_LNC1097	Os10t0442000-01	Similar to Lectin-like receptor kinase 7
Os03t0182800-01	ERF	OS_LNC1097	Os01t0521400-01	Similar to lipase family protein.
Os12t0573200-01	GRAS	OS_LNC1097	Os06t0647400-02	Similar to Lysosomal Pro-X carboxypeptidase.
MSTRG.16914.2	WRKY	OS_LNC1097	Os06t0647400-02	Similar to Lysosomal Pro-X carboxypeptidase.
Os12t0124500-01	ZF-HD	OS_LNC1097	Os07t0119000-01	Similar to MAP3K gamma protein kinase.
Os02t0673700-01	Dof	OS_LNC1097	Os06t0108500-01	Similar to MIKC-type MADS-box transcription factor AGL1.
MSTRG.24007.1	HSF	OS_LNC1097	Os02t0135200-00	Similar to Mitogen-activated protein kinase 13.
MSTRG.24007.1	HSF	OS_LNC1097	Os08t0557600-01	Similar to Monodehydroascorbate reductase.
Os05t0114700-02	MYB_related	OS_LNC1097	Os04t0452700-01	Similar to Monosaccharide transporter 1.
MSTRG.24007.1	HSF	OS_LNC1097	Os04t0209200-01	Similar to MRP-like ABC transporter.
Os12t0573200-01	GRAS	OS_LNC1097	Os08t0458200-01	Similar to MTD1.
MSTRG.24007.1	HSF	OS_LNC1097	Os06t0651100-02	Similar to NADPH HC toxin reductase.
Os03t0182800-01	ERF	OS_LNC1097	Os11t0485900-01	Similar to NB-ARC domain containing protein, expressed.
MSTRG.16914.2	WRKY	OS_LNC1097	Os04t0514600-00	Similar to NBS-LRR type disease resistance protein O2.
MSTRG.24007.1	HSF	OS_LNC1097	Os02t0232900-01	Similar to NOD26-like membrane integral protein ZmNIP1-1.
Os02t0673700-01	Dof	OS_LNC1097	Os06t0708700-01	Similar to Nodulin-like protein.
Os02t0673700-01	Dof	OS_LNC1097	Os04t0303950-01	Similar to OSIGBa0092O07.3 protein.
MSTRG.1373.1	WRKY	OS_LNC1097	Os04t0474800-02	Similar to OSIGBa0135C13.7 protein.
MSTRG.16914.2	WRKY	OS_LNC1097	Os06t0339500-01	Similar to OSIGBa0137A06.2 protein.
MSTRG.1373.1	WRKY	OS_LNC1097	Os06t0339500-01	Similar to OSIGBa0137A06.2 protein.
MSTRG.24007.1	HSF	OS_LNC1097	Os11t0184900-02	Similar to OsNAC5 protein [imported]-rice.
Os03t0182800-01	ERF	OS_LNC1097	Os10t0558700-02	Similar to Oxidoreductase, 2OG-Fe oxygenase family protein, expressed.
MSTRG.1373.1	WRKY	OS_LNC1097	Os10t0497700-01	Similar to Phytochelatin synthetase.
Os12t0573200-01	GRAS	OS_LNC1097	Os03t0280400-01	Similar to plant-specific domain TIGR01589 family protein.
MSTRG.1373.1	WRKY	OS_LNC1097	Os02t0823100-01	Similar to Plasma membrane intrinsic protein.
MSTRG.24007.1	HSF	OS_LNC1097	Os03t0693000-01	Similar to predicted protein.
MSTRG.16914.2	WRKY	OS_LNC1097	Os08t0455700-01	Similar to predicted protein.
Os03t0182800-01	ERF	OS_LNC1097	Os07t0512100-01	Similar to protein binding protein.
MSTRG.1373.1	WRKY	OS_LNC1097	Os08t0374701-01	Similar to Protein kinase domain containing protein, expressed.
MSTRG.1373.1	WRKY	OS_LNC1097	Os10t0571300-01	Similar to Protein kinase-like protein.
MSTRG.1373.1	WRKY	OS_LNC1097	Os07t0538400-01	Similar to Receptor-like protein kinase 4.
Os05t0114700-02	MYB_related	OS_LNC1097	Os09t0539200-01	Similar to Relative to SR12 protein.
MSTRG.16914.2	WRKY	OS_LNC1097	Os10t0566400-01	Similar to RING-H2 finger protein ATL3J.
MSTRG.1373.1	WRKY	OS_LNC1097	Os10t0570200-01	Similar to RIR1b protein precursor.
Os12t0573200-01	GRAS	OS_LNC1097	Os04t0472400-00	Similar to RNA recognition motif family protein.
MSTRG.24007.1	HSF	OS_LNC1097	Os03t0283900-01	Similar to Serine/threonine-protein kinase PBS1.
MSTRG.16914.2	WRKY	OS_LNC1097	Os05t0182600-01	Similar to SSRP1 protein.
MSTRG.1373.1	WRKY	OS_LNC1097	Os05t0182600-01	Similar to SSRP1 protein.
MSTRG.1373.1	WRKY	OS_LNC1097	Os08t0333000-01	Similar to SWP.
Os05t0114700-02	MYB_related	OS_LNC1097	Os03t0244200-02	Similar to thaumatin-like protein 1.
MSTRG.1373.1	WRKY	OS_LNC1097	Os04t0530600-01	Similar to Thioredoxin 1.
MSTRG.1373.1	WRKY	OS_LNC1097	Os06t0213200-01	Similar to Tic22.
MSTRG.1373.1	WRKY	OS_LNC1097	Os09t0489200-00	Similar to transcription factor jumonji domain-containing protein.
MSTRG.24007.1	HSF	OS_LNC1097	Os06t0203500-01	Similar to UMP-CMP kinase family protein.
Os05t0114700-02	MYB_related	OS_LNC1097	Os03t0321700-01	Similar to WRKY transcription factor 55.
MSTRG.24007.1	HSF	OS_LNC1097	Os01t0289732-01	Similar to WRKY transcription factor 6-like.
Os05t0114700-02	MYB_related	OS_LNC1097	Os10t0457500-01	Similar to Yeast ham related protein 1.
Os02t0673700-01	Dof	OS_LNC1097	Os12t0611000-01	Similar to Zinc-finger protein Lsd1.
Os05t0114700-02	MYB_related	OS_LNC1097	Os06t0159600-01	Tetratricopeptide-like helical domain containing protein.
Os05t0114700-02	MYB_related	OS_LNC1097	Os12t0636100-01	Tetratricopeptide-like helical domain containing protein.
MSTRG.1373.1	WRKY	OS_LNC1097	Os12t0636100-01	Tetratricopeptide-like helical domain containing protein.
MSTRG.1373.1	WRKY	OS_LNC1097	Os07t0615200-01	Tify domain containing protein.
Os12t0573200-01	GRAS	OS_LNC1097	Os03t0125700-01	Ubiquitin ligase, Det1/DDB1-complexing domain containing protein.
MSTRG.1373.1	WRKY	OS_LNC1097	Os01t0597800-01	UDP-glucuronosyl/UDP-glucosyltransferase family protein.
Os03t0182800-01	ERF	OS_LNC1097	Os01t0734800-01	UDP-glucuronosyl/UDP-glucosyltransferase family protein.
Os05t0114700-02	MYB_related	OS_LNC1097	Os01t0734800-01	UDP-glucuronosyl/UDP-glucosyltransferase family protein.
Os03t0182800-01	ERF	OS_LNC1097	Os09t0482900-01	UDP-glucuronosyl/UDP-glucosyltransferase family protein.
MSTRG.1373.1	WRKY	OS_LNC1097	Os09t0482900-01	UDP-glucuronosyl/UDP-glucosyltransferase family protein.
Os05t0114700-02	MYB_related	OS_LNC1097	Os06t0567000-01	Uncharacterised protein family UPF0197 domain containing protein.
Os05t0114700-02	MYB_related	OS_LNC1097	Os01t0511100-01	UspA domain containing protein.
Os02t0673700-01	Dof	OS_LNC1097	Os05t0543300-01	WD40 repeat, region domain containing protein.
Os03t0182800-01	ERF	OS_LNC1097	Os09t0363600-01	WD40/YVTN repeat-like domain containing protein.
MSTRG.1373.1	WRKY	OS_LNC1097	Os09t0417600-02	WRKY transcription factor, Transcriptional repressor, Pathogen defense
MSTRG.16914.2	WRKY	OS_LNC1097	Os08t0562300-01	Zinc finger, C2H2-type domain containing protein.
Os05t0114700-02	MYB_related	OS_LNC1097	Os09t0434900-02	Zinc finger, RING-type domain containing protein.
Os11t0490900-01	WRKY	OS_LNC1144	Os04t0690800-01	22-kDa Photosystem II protein, Photoprotection
MSTRG.14175.1	FAR1	OS_LNC1144	Os01t0830500-01	2OG-Fe(II) oxygenase domain containing protein.
MSTRG.34411.1	NAC	OS_LNC1144	Os04t0182200-01	2OG-Fe(II) oxygenase domain containing protein.
Os11t0490900-01	WRKY	OS_LNC1144	Os06t0255100-01	2OG-Fe(II) oxygenase domain containing protein.
Os03t0186600-01	MIKC_MADS	OS_LNC1144	Os06t0677400-01	3-hydroxyisobutyrate dehydrogenase domain containing protein.
MSTRG.34411.1	NAC	OS_LNC1144	Os06t0677400-01	3-hydroxyisobutyrate dehydrogenase domain containing protein.
Os01t0730700-01	WRKY	OS_LNC1144	Os08t0448000-01	4-coumarate:coenzyme A ligase, Lignin biosynthesis, Defense against wounding
Os01t0261200-01	NAC	OS_LNC1144	Os03t0141000-01	60S ribosomal protein L21.
MSTRG.34499.2	bZIP	OS_LNC1144	Os04t0578000-01	ACC synthase, Ethylene biosynthesis
MSTRG.14175.1	FAR1	OS_LNC1144	Os02t0139100-01	Activator of Hsp90 ATPase, N-terminal domain containing protein.
Os01t0730700-01	WRKY	OS_LNC1144	Os02t0139100-01	Activator of Hsp90 ATPase, N-terminal domain containing protein.
Os07t0667300-01	CO-like	OS_LNC1144	Os06t0703800-01	Activator of Hsp90 ATPase, N-terminal domain containing protein.
Os11t0490900-01	WRKY	OS_LNC1144	Os03t0767000-01	Allene oxide synthase, Biosynthesis of jasmonic acid
MSTRG.34411.1	NAC	OS_LNC1144	Os01t0595600-01	Alpha/beta hydrolase fold-1 domain containing protein.
MSTRG.34411.1	NAC	OS_LNC1144	Os02t0567800-01	Alpha/beta hydrolase fold-3 domain containing protein.
Os12t0573200-01	GRAS	OS_LNC1144	Os03t0790500-01	Alpha/beta hydrolase fold-3 domain containing protein.
Os11t0490900-01	WRKY	OS_LNC1144	Os06t0214300-01	Alpha/beta hydrolase fold-3 domain containing protein.
Os02t0807700-01	LSD	OS_LNC1144	Os11t0239500-01	Alpha/beta hydrolase fold-3 domain containing protein.
Os07t0684800-01	NAC	OS_LNC1144	Os12t0118800-01	Ankyrin repeat containing protein.
Os12t0152900-01	bZIP	OS_LNC1144	Os01t0141000-01	AP2/ERF and B3 domain-containing protein, Salt stress response
Os11t0490900-01	WRKY	OS_LNC1144	Os02t0654700-01	AP2/ERF family protein, Abiotic stress response
MSTRG.34499.2	bZIP	OS_LNC1144	Os01t0884400-01	Armadillo domain containing protein.
MSTRG.34499.2	bZIP	OS_LNC1144	Os01t0956075-00	Armadillo-like helical domain containing protein.
MSTRG.14175.1	FAR1	OS_LNC1144	Os07t0192000-01	ATPase, AAA-type, core domain containing protein.
Os12t0573200-01	GRAS	OS_LNC1144	Os08t0379200-01	ATPase, P-type, K/Mg/Cd/Cu/Zn/Na/Ca/Na/H-transporter family protein.
Os01t0261200-01	NAC	OS_LNC1144	Os10t0184300-01	ATPase, V0/A0 complex, 116-kDa subunit family protein.
Os02t0807700-01	LSD	OS_LNC1144	Os10t0181700-01	ATP-binding region, ATPase-like domain containing protein.
MSTRG.34411.1	NAC	OS_LNC1144	Os01t0768333-00	Auxin responsive SAUR protein family protein.
MSTRG.26383.1	WRKY	OS_LNC1144	Os06t0714300-01	Auxin responsive SAUR protein family protein.
Os01t0261200-01	NAC	OS_LNC1144	Os11t0207300-00	Bacterial luciferase-like family protein.
Os07t0667300-01	CO-like	OS_LNC1144	Os01t0588400-01	Band 7 protein family protein.
MSTRG.26383.1	WRKY	OS_LNC1144	Os08t0485800-01	Barwin-related endoglucanase domain containing protein.
Os07t0667300-01	CO-like	OS_LNC1144	Os02t0673500-01	Basic helix-loop-helix dimerisation region bHLH domain containing protein.
MSTRG.34411.1	NAC	OS_LNC1144	Os02t0194900-00	Basic-leucine zipper transcription factor domain containing protein.
MSTRG.34411.1	NAC	OS_LNC1144	Os09t0569400-01	Beta-lactamase-like domain containing protein.
Os12t0152900-01	bZIP	OS_LNC1144	Os07t0198300-01	Bifunctional inhibitor/plant lipid transfer protein/seed storage domain containing protein.
Os01t0730700-01	WRKY	OS_LNC1144	Os01t0867300-01	bZIP transcription factor, Abiotic stress response, ABA signaling, Suppressor of floral transition upon drought stress
MSTRG.14175.1	FAR1	OS_LNC1144	Os08t0157500-01	Caffeic acid O-methyltransferase, Flavonoid 3'-O-methyltransferase, Melatonin biosynthesis, Tricin biosynthesis
Os01t0261200-01	NAC	OS_LNC1144	Os03t0743500-02	Calcium-binding EF-hand domain containing protein.
MSTRG.34499.2	bZIP	OS_LNC1144	Os02t0753800-01	Calcium-binding protein, Annexin, Heat and drought stress tolerance
MSTRG.14175.1	FAR1	OS_LNC1144	Os02t0753800-01	Calcium-binding protein, Annexin, Heat and drought stress tolerance
Os12t0573200-01	GRAS	OS_LNC1144	Os03t0688300-01	Calcium-dependent protein kinase, Positive regulator of drought stress tolerance and spikelet fertility
Os12t0152900-01	bZIP	OS_LNC1144	Os12t0556200-01	Calmodulin binding protein-like family protein.
MSTRG.34411.1	NAC	OS_LNC1144	Os03t0216700-01	Citrate transporter, Efficient translocation of Fe
Os12t0152900-01	bZIP	OS_LNC1144	Os11t0661800-01	Concanavalin A-like lectin/glucanase domain containing protein.
Os12t0152900-01	bZIP	OS_LNC1144	Os01t0194000-01	Conserved hypothetical protein.
MSTRG.34411.1	NAC	OS_LNC1144	Os01t0194000-01	Conserved hypothetical protein.
Os01t0261200-01	NAC	OS_LNC1144	Os01t0214500-01	Conserved hypothetical protein.
Os11t0490900-01	WRKY	OS_LNC1144	Os01t0214500-01	Conserved hypothetical protein.
Os12t0152900-01	bZIP	OS_LNC1144	Os01t0346600-01	Conserved hypothetical protein.
MSTRG.14175.1	FAR1	OS_LNC1144	Os01t0346600-01	Conserved hypothetical protein.
MSTRG.34411.1	NAC	OS_LNC1144	Os01t0670500-01	Conserved hypothetical protein.
Os11t0490900-01	WRKY	OS_LNC1144	Os01t0670500-01	Conserved hypothetical protein.
Os12t0152900-01	bZIP	OS_LNC1144	Os01t0706600-00	Conserved hypothetical protein.
Os07t0667300-01	CO-like	OS_LNC1144	Os01t0706600-00	Conserved hypothetical protein.
Os01t0730700-01	WRKY	OS_LNC1144	Os01t0833400-02	Conserved hypothetical protein.
Os12t0152900-01	bZIP	OS_LNC1144	Os01t0948600-01	Conserved hypothetical protein.
Os12t0152900-01	bZIP	OS_LNC1144	Os02t0212400-00	Conserved hypothetical protein.
Os12t0152900-01	bZIP	OS_LNC1144	Os02t0253700-01	Conserved hypothetical protein.
MSTRG.34499.2	bZIP	OS_LNC1144	Os02t0264300-01	Conserved hypothetical protein.
Os07t0684800-01	NAC	OS_LNC1144	Os02t0264300-01	Conserved hypothetical protein.
Os11t0490900-01	WRKY	OS_LNC1144	Os02t0264300-01	Conserved hypothetical protein.
Os07t0667300-01	CO-like	OS_LNC1144	Os02t0552700-01	Conserved hypothetical protein.
Os01t0261200-01	NAC	OS_LNC1144	Os02t0552700-01	Conserved hypothetical protein.
MSTRG.34499.2	bZIP	OS_LNC1144	Os02t0603600-01	Conserved hypothetical protein.
MSTRG.34499.2	bZIP	OS_LNC1144	Os02t0690200-01	Conserved hypothetical protein.
MSTRG.26383.1	WRKY	OS_LNC1144	Os02t0690200-01	Conserved hypothetical protein.
Os11t0490900-01	WRKY	OS_LNC1144	Os02t0690200-01	Conserved hypothetical protein.
MSTRG.34499.2	bZIP	OS_LNC1144	Os03t0201000-01	Conserved hypothetical protein.
MSTRG.34411.1	NAC	OS_LNC1144	Os03t0204900-01	Conserved hypothetical protein.
Os01t0730700-01	WRKY	OS_LNC1144	Os03t0204900-01	Conserved hypothetical protein.
MSTRG.14175.1	FAR1	OS_LNC1144	Os03t0349600-03	Conserved hypothetical protein.
Os12t0573200-01	GRAS	OS_LNC1144	Os03t0351700-01	Conserved hypothetical protein.
Os11t0490900-01	WRKY	OS_LNC1144	Os03t0683700-02	Conserved hypothetical protein.
Os02t0807700-01	LSD	OS_LNC1144	Os05t0194550-01	Conserved hypothetical protein.
Os12t0152900-01	bZIP	OS_LNC1144	Os05t0273500-01	Conserved hypothetical protein.
Os11t0490900-01	WRKY	OS_LNC1144	Os05t0273500-01	Conserved hypothetical protein.
Os12t0573200-01	GRAS	OS_LNC1144	Os05t0349400-01	Conserved hypothetical protein.
Os07t0684800-01	NAC	OS_LNC1144	Os05t0357850-01	Conserved hypothetical protein.
Os11t0490900-01	WRKY	OS_LNC1144	Os05t0520600-01	Conserved hypothetical protein.
Os12t0152900-01	bZIP	OS_LNC1144	Os06t0147400-01	Conserved hypothetical protein.
MSTRG.14175.1	FAR1	OS_LNC1144	Os06t0147400-01	Conserved hypothetical protein.
MSTRG.26383.1	WRKY	OS_LNC1144	Os06t0581701-01	Conserved hypothetical protein.
Os11t0490900-01	WRKY	OS_LNC1144	Os06t0586000-01	Conserved hypothetical protein.
MSTRG.34499.2	bZIP	OS_LNC1144	Os06t0710900-01	Conserved hypothetical protein.
Os12t0152900-01	bZIP	OS_LNC1144	Os06t0711200-01	Conserved hypothetical protein.
Os03t0186600-01	MIKC_MADS	OS_LNC1144	Os06t0711200-01	Conserved hypothetical protein.
Os03t0186600-01	MIKC_MADS	OS_LNC1144	Os07t0151800-01	Conserved hypothetical protein.
MSTRG.34411.1	NAC	OS_LNC1144	Os07t0151800-01	Conserved hypothetical protein.
MSTRG.34411.1	NAC	OS_LNC1144	Os07t0416700-00	Conserved hypothetical protein.
Os01t0261200-01	NAC	OS_LNC1144	Os07t0572500-01	Conserved hypothetical protein.
Os07t0667300-01	CO-like	OS_LNC1144	Os07t0638000-01	Conserved hypothetical protein.
Os07t0667300-01	CO-like	OS_LNC1144	Os08t0170800-01	Conserved hypothetical protein.
Os03t0186600-01	MIKC_MADS	OS_LNC1144	Os08t0198900-01	Conserved hypothetical protein.
Os11t0490900-01	WRKY	OS_LNC1144	Os08t0204632-01	Conserved hypothetical protein.
Os03t0186600-01	MIKC_MADS	OS_LNC1144	Os08t0351300-01	Conserved hypothetical protein.
MSTRG.14175.1	FAR1	OS_LNC1144	Os08t0416800-01	Conserved hypothetical protein.
MSTRG.34411.1	NAC	OS_LNC1144	Os08t0420700-01	Conserved hypothetical protein.
MSTRG.26383.1	WRKY	OS_LNC1144	Os08t0430300-01	Conserved hypothetical protein.
Os12t0573200-01	GRAS	OS_LNC1144	Os09t0120100-00	Conserved hypothetical protein.
MSTRG.34499.2	bZIP	OS_LNC1144	Os09t0272600-01	Conserved hypothetical protein.
Os07t0667300-01	CO-like	OS_LNC1144	Os09t0412400-01	Conserved hypothetical protein.
Os01t0730700-01	WRKY	OS_LNC1144	Os09t0430701-00	Conserved hypothetical protein.
Os12t0152900-01	bZIP	OS_LNC1144	Os10t0462200-01	Conserved hypothetical protein.
MSTRG.14175.1	FAR1	OS_LNC1144	Os10t0491400-01	Conserved hypothetical protein.
Os01t0730700-01	WRKY	OS_LNC1144	Os10t0557700-01	Conserved hypothetical protein.
Os12t0152900-01	bZIP	OS_LNC1144	Os10t0568000-01	Conserved hypothetical protein.
Os02t0807700-01	LSD	OS_LNC1144	Os12t0545900-01	Conserved hypothetical protein.
Os01t0730700-01	WRKY	OS_LNC1144	Os05t0529200-02	Crotonase, core domain containing protein.
MSTRG.34499.2	bZIP	OS_LNC1144	Os02t0813166-00	Cyclin-like F-box domain containing protein.
MSTRG.26383.1	WRKY	OS_LNC1144	Os02t0813166-00	Cyclin-like F-box domain containing protein.
Os01t0730700-01	WRKY	OS_LNC1144	Os02t0813166-00	Cyclin-like F-box domain containing protein.
Os07t0667300-01	CO-like	OS_LNC1144	Os07t0122900-01	Cyclin-like F-box domain containing protein.
Os03t0186600-01	MIKC_MADS	OS_LNC1144	Os04t0136700-01	Cystathionine beta-synthase, core domain containing protein.
Os02t0807700-01	LSD	OS_LNC1144	Os02t0569900-01	Cytochrome P450 family protein.
Os12t0152900-01	bZIP	OS_LNC1144	Os02t0570700-01	Cytochrome P450 family protein.
MSTRG.34499.2	bZIP	OS_LNC1144	Os06t0328900-01	Cytochrome P450 family protein.
Os11t0490900-01	WRKY	OS_LNC1144	Os06t0501900-01	Cytochrome P450 family protein.
Os11t0490900-01	WRKY	OS_LNC1144	Os10t0513900-01	Cytochrome P450 family protein.
MSTRG.26383.1	WRKY	OS_LNC1144	Os03t0328000-01	Dedicator of cytokinesis family protein.
MSTRG.34499.2	bZIP	OS_LNC1144	Os02t0199200-00	Disease resistance protein domain containing protein.
MSTRG.34411.1	NAC	OS_LNC1144	Os09t0272900-01	Disease resistance protein domain containing protein.
Os12t0573200-01	GRAS	OS_LNC1144	Os10t0394400-01	Disease resistance protein domain containing protein.
MSTRG.34411.1	NAC	OS_LNC1144	Os10t0394400-01	Disease resistance protein domain containing protein.
Os07t0667300-01	CO-like	OS_LNC1144	Os03t0586900-01	DNA helicase, putative domain containing protein.
Os02t0807700-01	LSD	OS_LNC1144	Os03t0586900-01	DNA helicase, putative domain containing protein.
MSTRG.34499.2	bZIP	OS_LNC1144	Os06t0647500-01	DNA/RNA non-specific endonuclease, active site domain containing protein.
Os11t0490900-01	WRKY	OS_LNC1144	Os02t0580400-01	Dynein light chain, type 1 family protein.
Os12t0573200-01	GRAS	OS_LNC1144	Os06t0694200-01	Esterase, SGNH hydrolase-type domain containing protein.
Os11t0490900-01	WRKY	OS_LNC1144	Os07t0535700-01	F-box associated type 1 domain containing protein.
Os11t0490900-01	WRKY	OS_LNC1144	Os08t0461700-01	F-box domain, cyclin-like domain containing protein.
Os07t0684800-01	NAC	OS_LNC1144	Os02t0533000-00	FeS cluster biogenesis domain containing protein.
MSTRG.34499.2	bZIP	OS_LNC1144	Os01t0692100-01	Glutathione S-transferase, C-terminal-like domain containing protein.
Os11t0490900-01	WRKY	OS_LNC1144	Os01t0692100-01	Glutathione S-transferase, C-terminal-like domain containing protein.
Os01t0730700-01	WRKY	OS_LNC1144	Os02t0139300-01	Glycoside hydrolase, family 17 protein.
Os01t0261200-01	NAC	OS_LNC1144	Os05t0244500-01	Glycoside hydrolase, family 5 protein.
MSTRG.14175.1	FAR1	OS_LNC1144	Os09t0452900-01	Glycosyl transferase, family 31 protein.
Os12t0573200-01	GRAS	OS_LNC1144	Os11t0124900-01	Glycosyl transferase, family 8 protein.
Os01t0261200-01	NAC	OS_LNC1144	Os04t0196600-01	Glycosyltransferase AER61, uncharacterized domain containing protein.
MSTRG.34411.1	NAC	OS_LNC1144	Os03t0659300-01	Glyoxalase/bleomycin resistance protein/dioxygenase domain containing protein.
Os02t0807700-01	LSD	OS_LNC1144	Os05t0306000-01	GOLD domain containing protein.
Os12t0573200-01	GRAS	OS_LNC1144	Os03t0737300-01	HAD-superfamily phosphatase, subfamily IIIC domain containing protein.
Os12t0573200-01	GRAS	OS_LNC1144	Os04t0685400-02	Harpin-induced 1 domain containing protein.
Os03t0186600-01	MIKC_MADS	OS_LNC1144	Os02t0582600-02	Heavy metal transport/detoxification protein domain containing protein.
Os03t0186600-01	MIKC_MADS	OS_LNC1144	Os03t0124000-01	Homeodomain-related domain containing protein.
Os11t0490900-01	WRKY	OS_LNC1144	Os03t0124000-01	Homeodomain-related domain containing protein.
MSTRG.26383.1	WRKY	OS_LNC1144	Os03t0124000-01	Homeodomain-related domain containing protein.
MSTRG.34499.2	bZIP	OS_LNC1144	Os04t0600200-01	Homodimeric diiron-carboxylate protein, Cyanide-resistant respiration in mitochondria, Reactive oxygen species scavenging
MSTRG.34499.2	bZIP	OS_LNC1144	Os03t0230300-01	Homologue of SRO, Regulation of stomatal closure, Abiotic stress response
Os12t0573200-01	GRAS	OS_LNC1144	Os07t0274700-01	HvB12D protein.
Os12t0573200-01	GRAS	OS_LNC1144	Os01t0742766-01	Hypothetical conserved gene.
MSTRG.34499.2	bZIP	OS_LNC1144	Os04t0121800-01	Hypothetical conserved gene.
MSTRG.26383.1	WRKY	OS_LNC1144	Os04t0684100-02	Hypothetical conserved gene.
MSTRG.26383.1	WRKY	OS_LNC1144	Os05t0360800-00	Hypothetical conserved gene.
Os02t0807700-01	LSD	OS_LNC1144	Os06t0133300-00	Hypothetical conserved gene.
Os11t0490900-01	WRKY	OS_LNC1144	Os06t0710001-00	Hypothetical conserved gene.
Os12t0573200-01	GRAS	OS_LNC1144	Os08t0355500-03	Hypothetical conserved gene.
Os01t0261200-01	NAC	OS_LNC1144	Os09t0517200-00	Hypothetical conserved gene.
MSTRG.26383.1	WRKY	OS_LNC1144	Os10t0481000-00	Hypothetical conserved gene.
Os11t0490900-01	WRKY	OS_LNC1144	Os10t0563800-00	Hypothetical conserved gene.
Os01t0730700-01	WRKY	OS_LNC1144	Os11t0139700-01	Hypothetical conserved gene.
Os12t0152900-01	bZIP	OS_LNC1144	Os11t0551900-01	Hypothetical conserved gene.
Os11t0490900-01	WRKY	OS_LNC1144	Os11t0600600-01	Hypothetical conserved gene.
MSTRG.34499.2	bZIP	OS_LNC1144	Os02t0626532-01	Hypothetical gene.
MSTRG.34499.2	bZIP	OS_LNC1144	Os02t0644466-00	Hypothetical gene.
Os03t0186600-01	MIKC_MADS	OS_LNC1144	Os02t0644466-00	Hypothetical gene.
Os01t0730700-01	WRKY	OS_LNC1144	Os02t0644466-00	Hypothetical gene.
MSTRG.26383.1	WRKY	OS_LNC1144	Os04t0411651-00	Hypothetical gene.
Os07t0667300-01	CO-like	OS_LNC1144	Os06t0473700-01	Hypothetical gene.
MSTRG.26383.1	WRKY	OS_LNC1144	Os06t0473700-01	Hypothetical gene.
Os12t0573200-01	GRAS	OS_LNC1144	Os09t0100750-01	Hypothetical gene.
Os12t0573200-01	GRAS	OS_LNC1144	Os09t0397800-01	Hypothetical gene.
MSTRG.34499.2	bZIP	OS_LNC1144	Os10t0125600-02	Hypothetical gene.
MSTRG.34411.1	NAC	OS_LNC1144	Os12t0203900-01	Hypothetical gene.
Os07t0684800-01	NAC	OS_LNC1144	Os12t0528801-01	Hypothetical gene.
MSTRG.14175.1	FAR1	OS_LNC1144	Os01t0848475-00	Hypothetical protein.
Os02t0807700-01	LSD	OS_LNC1144	Os01t0953000-01	Hypothetical protein.
Os01t0261200-01	NAC	OS_LNC1144	Os02t0808500-01	Hypothetical protein.
Os12t0573200-01	GRAS	OS_LNC1144	Os03t0237201-00	Hypothetical protein.
Os01t0730700-01	WRKY	OS_LNC1144	Os03t0237201-00	Hypothetical protein.
MSTRG.26383.1	WRKY	OS_LNC1144	Os03t0237201-00	Hypothetical protein.
MSTRG.26383.1	WRKY	OS_LNC1144	Os03t0267100-01	Hypothetical protein.
Os03t0186600-01	MIKC_MADS	OS_LNC1144	Os04t0458250-00	Hypothetical protein.
MSTRG.34499.2	bZIP	OS_LNC1144	Os04t0615200-01	Hypothetical protein.
Os01t0261200-01	NAC	OS_LNC1144	Os06t0200700-01	Hypothetical protein.
MSTRG.26383.1	WRKY	OS_LNC1144	Os06t0200700-01	Hypothetical protein.
MSTRG.34411.1	NAC	OS_LNC1144	Os07t0503200-03	Hypothetical protein.
MSTRG.34499.2	bZIP	OS_LNC1144	Os07t0580800-01	Hypothetical protein.
Os07t0667300-01	CO-like	OS_LNC1144	Os07t0660466-00	Hypothetical protein.
MSTRG.14175.1	FAR1	OS_LNC1144	Os07t0669675-00	Hypothetical protein.
MSTRG.34499.2	bZIP	OS_LNC1144	Os10t0456000-01	Hypothetical protein.
Os12t0573200-01	GRAS	OS_LNC1144	Os10t0456000-01	Hypothetical protein.
MSTRG.14175.1	FAR1	OS_LNC1144	Os10t0558850-00	Hypothetical protein.
Os03t0186600-01	MIKC_MADS	OS_LNC1144	Os10t0559300-01	Hypothetical protein.
MSTRG.26383.1	WRKY	OS_LNC1144	Os10t0559300-01	Hypothetical protein.
Os03t0186600-01	MIKC_MADS	OS_LNC1144	Os11t0227250-01	Hypothetical protein.
Os12t0152900-01	bZIP	OS_LNC1144	Os11t0556132-00	Hypothetical protein.
Os02t0807700-01	LSD	OS_LNC1144	Os12t0478200-02	Hypothetical protein.
Os12t0152900-01	bZIP	OS_LNC1144	Os02t0606800-01	Isochorismatase hydrolase family protein.
Os11t0490900-01	WRKY	OS_LNC1144	Os02t0606800-01	Isochorismatase hydrolase family protein.
MSTRG.14175.1	FAR1	OS_LNC1144	Os01t0188100-01	Isopenicillin N synthase family protein.
MSTRG.34411.1	NAC	OS_LNC1144	Os02t0645100-01	Kinesin, motor region domain containing protein.
MSTRG.34499.2	bZIP	OS_LNC1144	Os04t0371600-01	Leucine-rich repeat, cysteine-containing containing protein.
Os07t0684800-01	NAC	OS_LNC1144	Os04t0672600-01	Leucine-rich repeat, N-terminal domain containing protein.
MSTRG.14175.1	FAR1	OS_LNC1144	Os11t0615000-01	LNS2, Lipin/Ned1/Smp2 domain containing protein.
Os07t0684800-01	NAC	OS_LNC1144	Os02t0732700-01	Mediator complex, subunit Med23 domain containing protein.
Os12t0152900-01	bZIP	OS_LNC1144	Os09t0533300-01	Metallophosphoesterase domain containing protein.
Os01t0730700-01	WRKY	OS_LNC1144	Os11t0261900-01	Metallophosphoesterase domain containing protein.
Os01t0261200-01	NAC	OS_LNC1144	Os01t0149800-01	Metallothionein-like protein type 2.
MSTRG.34499.2	bZIP	OS_LNC1144	Os05t0404600-01	Methyl-CpG DNA binding domain containing protein.
Os07t0667300-01	CO-like	OS_LNC1144	Os10t0573800-01	Mitochondrial carnitine/acylcarnitine carrier-like protein.
MSTRG.34499.2	bZIP	OS_LNC1144	Os02t0787300-01	Mitogen-activated protein kinase kinase 4, Defense response, Cell proliferation, Grain growth
Os01t0261200-01	NAC	OS_LNC1144	Os06t0494400-01	Multi antimicrobial extrusion protein MatE family protein.
Os12t0152900-01	bZIP	OS_LNC1144	Os03t0327800-01	NAC Family transcriptional activator, Abiotic stress response, Positive regulator of leaf senescence
Os07t0684800-01	NAC	OS_LNC1144	Os03t0327800-01	NAC Family transcriptional activator, Abiotic stress response, Positive regulator of leaf senescence
Os11t0490900-01	WRKY	OS_LNC1144	Os03t0324600-01	NB-ARC domain containing protein.
Os12t0152900-01	bZIP	OS_LNC1144	Os08t0387700-01	NB-ARC domain containing protein.
MSTRG.34411.1	NAC	OS_LNC1144	Os12t0565100-01	NB-ARC domain containing protein.
Os07t0684800-01	NAC	OS_LNC1144	Os03t0684300-01	Nucleic acid binding, OB-fold, tRNA/helicase-type domain containing protein.
Os07t0667300-01	CO-like	OS_LNC1144	Os01t0846000-01	Nucleic acid-binding, OB-fold domain containing protein.
Os01t0261200-01	NAC	OS_LNC1144	Os08t0504600-01	Nucleotide-binding, alpha-beta plait domain containing protein.
Os11t0490900-01	WRKY	OS_LNC1144	Os03t0759500-01	Origin recognition complex 5.
MSTRG.26383.1	WRKY	OS_LNC1144	Os06t0669800-01	Ovarian tumour, otubain domain containing protein.
Os07t0667300-01	CO-like	OS_LNC1144	Os01t0819800-01	Pentatricopeptide repeat domain containing protein.
Os11t0490900-01	WRKY	OS_LNC1144	Os03t0317300-01	Peptidase A1 domain containing protein.
MSTRG.34499.2	bZIP	OS_LNC1144	Os06t0268700-01	Peptidase A1 domain containing protein.
Os12t0573200-01	GRAS	OS_LNC1144	Os09t0482500-01	Peptidase A1 domain containing protein.
MSTRG.34499.2	bZIP	OS_LNC1144	Os10t0538200-01	Peptidase aspartic, catalytic domain containing protein.
Os07t0667300-01	CO-like	OS_LNC1144	Os10t0538200-01	Peptidase aspartic, catalytic domain containing protein.
Os02t0807700-01	LSD	OS_LNC1144	Os10t0538200-01	Peptidase aspartic, catalytic domain containing protein.
Os11t0490900-01	WRKY	OS_LNC1144	Os01t0629600-01	Peptidase S10, serine carboxypeptidase family protein.
Os01t0261200-01	NAC	OS_LNC1144	Os05t0158500-01	Peptidase S10, serine carboxypeptidase family protein.
Os02t0807700-01	LSD	OS_LNC1144	Os06t0730600-01	Peptidase S9A, prolyl oligopeptidase family protein.
Os07t0684800-01	NAC	OS_LNC1144	Os11t0657100-01	Peptide chain release factor 1 family protein.
MSTRG.34499.2	bZIP	OS_LNC1144	Os01t0564300-01	Peptidyl-prolyl cis-trans isomerase, FKBP-type domain containing protein.
Os12t0573200-01	GRAS	OS_LNC1144	Os05t0593000-01	Phospholipase A2, active site domain containing protein.
Os11t0490900-01	WRKY	OS_LNC1144	Os07t0107300-01	Plant disease resistance response protein family protein.
Os12t0152900-01	bZIP	OS_LNC1144	Os11t0175400-01	Plant neutral invertase family protein.
MSTRG.14175.1	FAR1	OS_LNC1144	Os04t0406600-01	Prephenate dehydratase domain containing protein.
Os12t0573200-01	GRAS	OS_LNC1144	Os02t0153900-01	Protein kinase, core domain containing protein.
Os01t0730700-01	WRKY	OS_LNC1144	Os04t0618700-01	Protein kinase, core domain containing protein.
Os03t0186600-01	MIKC_MADS	OS_LNC1144	Os03t0777500-01	Protein of unknown function DUF1068 family protein.
Os07t0667300-01	CO-like	OS_LNC1144	Os10t0495900-01	Protein of unknown function DUF1218 family protein.
Os07t0667300-01	CO-like	OS_LNC1144	Os10t0479800-01	Protein of unknown function DUF1336 domain containing protein.
Os07t0667300-01	CO-like	OS_LNC1144	Os10t0508600-01	Protein of unknown function DUF1352 domain containing protein.
Os02t0807700-01	LSD	OS_LNC1144	Os11t0621300-00	Protein of unknown function DUF1399 family protein.
MSTRG.34411.1	NAC	OS_LNC1144	Os01t0132500-01	Protein of unknown function DUF1639 domain containing protein.
Os12t0152900-01	bZIP	OS_LNC1144	Os06t0215100-01	Protein of unknown function DUF1645 family protein.
Os01t0730700-01	WRKY	OS_LNC1144	Os03t0565300-01	Protein of unknown function DUF1723 domain containing protein.
Os11t0490900-01	WRKY	OS_LNC1144	Os01t0950900-01	Protein of unknown function DUF221 domain containing protein.
Os01t0261200-01	NAC	OS_LNC1144	Os06t0235200-01	Protein of unknown function DUF231 domain containing protein.
MSTRG.14175.1	FAR1	OS_LNC1144	Os11t0541600-00	Protein of unknown function DUF247, plant domain containing protein.
Os11t0490900-01	WRKY	OS_LNC1144	Os08t0478466-01	Protein of unknown function DUF296 domain containing protein.
MSTRG.26383.1	WRKY	OS_LNC1144	Os03t0297000-01	Protein of unknown function DUF538 family protein.
Os12t0152900-01	bZIP	OS_LNC1144	Os03t0194600-01	Protein of unknown function DUF568, DOMON-like domain containing protein.
Os07t0667300-01	CO-like	OS_LNC1144	Os05t0531100-01	Protein of unknown function DUF584 family protein.
Os11t0490900-01	WRKY	OS_LNC1144	Os07t0516300-01	Protein of unknown function DUF584 family protein.
Os01t0261200-01	NAC	OS_LNC1144	Os01t0798800-01	Protein of unknown function DUF594 family protein.
MSTRG.34411.1	NAC	OS_LNC1144	Os01t0389700-01	Protein of unknown function DUF679 family protein.
Os02t0807700-01	LSD	OS_LNC1144	Os10t0560000-01	Protein of unknown function DUF828, plant family protein.
Os01t0261200-01	NAC	OS_LNC1144	Os10t0560000-01	Protein of unknown function DUF828, plant family protein.
MSTRG.34411.1	NAC	OS_LNC1144	Os06t0698300-01	Protein phosphatase 2C family protein.
MSTRG.34411.1	NAC	OS_LNC1144	Os01t0124100-01	Proteinase inhibitor I12, Bowman-Birk family protein.
Os11t0490900-01	WRKY	OS_LNC1144	Os01t0124100-01	Proteinase inhibitor I12, Bowman-Birk family protein.
MSTRG.34411.1	NAC	OS_LNC1144	Os07t0564500-01	Pyridine nucleotide-disulphide oxidoreductase, NAD-binding region domain containing protein.
Os12t0152900-01	bZIP	OS_LNC1144	Os01t0908100-01	RabGAP/TBC domain containing protein.
MSTRG.26383.1	WRKY	OS_LNC1144	Os01t0908100-01	RabGAP/TBC domain containing protein.
MSTRG.34411.1	NAC	OS_LNC1144	Os02t0561800-01	RING-H2 type E3 ubiquitin ligase, Root development, Maintenance of cell viability after the initiation of root primordial formation, Defense response
Os12t0152900-01	bZIP	OS_LNC1144	Os02t0152400-01	Rubisco small subunit 1, Reguration of Rubisco catalytic activity
Os12t0152900-01	bZIP	OS_LNC1144	Os11t0690066-00	Serine/threonine protein kinase domain containing protein.
Os12t0573200-01	GRAS	OS_LNC1144	Os11t0690066-00	Serine/threonine protein kinase domain containing protein.
Os07t0684800-01	NAC	OS_LNC1144	Os09t0482640-01	Serine/threonine protein kinase-related domain containing protein.
Os01t0261200-01	NAC	OS_LNC1144	Os09t0482640-01	Serine/threonine protein kinase-related domain containing protein.
Os01t0730700-01	WRKY	OS_LNC1144	Os05t0580500-01	Similar to 10A19I.14.
Os02t0807700-01	LSD	OS_LNC1144	Os03t0608700-01	Similar to 10A19I.15.
Os07t0684800-01	NAC	OS_LNC1144	Os02t0784700-00	Similar to 26S protease regulatory subunit 7.
MSTRG.14175.1	FAR1	OS_LNC1144	Os01t0974900-00	Similar to 26S proteasome non-ATPase regulatory subunit 6.
Os12t0152900-01	bZIP	OS_LNC1144	Os09t0492700-01	Similar to 3-hydroxy-3-methylglutaryl coenzyme A reductase.
Os07t0667300-01	CO-like	OS_LNC1144	Os01t0100700-01	Similar to 40S ribosomal protein S5-1.
Os12t0152900-01	bZIP	OS_LNC1144	Os03t0152400-01	Similar to 4-coumarate--CoA ligase-like 1.
Os12t0152900-01	bZIP	OS_LNC1144	Os05t0452600-01	Similar to 50S ribosomal protein L33.
Os12t0573200-01	GRAS	OS_LNC1144	Os02t0235600-01	Similar to 60S ribosomal protein L11-2. Splice isoform 2.
Os03t0186600-01	MIKC_MADS	OS_LNC1144	Os02t0796900-00	Similar to 60S ribosomal protein L39.
MSTRG.34411.1	NAC	OS_LNC1144	Os05t0163700-01	Similar to Acyl-coenzyme A oxidase 4, peroxisomal.
Os12t0152900-01	bZIP	OS_LNC1144	Os11t0210500-01	Similar to Alcohol dehydrogenase.
Os11t0490900-01	WRKY	OS_LNC1144	Os02t0191300-01	Similar to Amino acid transporter-like protein.
MSTRG.14175.1	FAR1	OS_LNC1144	Os04t0630800-01	Similar to Anthocyanidin reductase.
Os12t0573200-01	GRAS	OS_LNC1144	Os03t0718000-01	Similar to Anthranilate synthase beta chain.
Os11t0490900-01	WRKY	OS_LNC1144	Os10t0535900-00	Similar to ATEXPA7.
Os11t0490900-01	WRKY	OS_LNC1144	Os09t0533600-01	Similar to Avr9/Cf-9 induced kinase 1.
MSTRG.34411.1	NAC	OS_LNC1144	Os11t0592100-01	Similar to Barwin.
Os01t0730700-01	WRKY	OS_LNC1144	Os01t0940800-01	Similar to Beta-1,3-glucanase precursor.
Os01t0261200-01	NAC	OS_LNC1144	Os01t0944700-01	Similar to Beta-1,3-glucanase precursor.
Os11t0490900-01	WRKY	OS_LNC1144	Os09t0481400-01	Similar to Caffeoyl-CoA O-methyltransferase.
Os01t0261200-01	NAC	OS_LNC1144	Os12t0133300-00	Similar to Carbohydrate transporter/ sugar porter/ transporter.
MSTRG.34499.2	bZIP	OS_LNC1144	Os10t0568900-01	Similar to Catalytic/ hydrolase.
MSTRG.34411.1	NAC	OS_LNC1144	Os01t0233900-01	Similar to cDNA clone:J013003E06, full insert sequence.
MSTRG.34499.2	bZIP	OS_LNC1144	Os08t0417100-01	Similar to cDNA, clone: J100014C05, full insert sequence.
Os07t0684800-01	NAC	OS_LNC1144	Os01t0686000-01	Similar to cDNA, clone: J100026I16, full insert sequence.
Os12t0152900-01	bZIP	OS_LNC1144	Os06t0726200-02	Similar to Chitinase 1.
Os12t0573200-01	GRAS	OS_LNC1144	Os06t0726200-02	Similar to Chitinase 1.
Os02t0807700-01	LSD	OS_LNC1144	Os06t0726200-02	Similar to Chitinase 1.
MSTRG.34411.1	NAC	OS_LNC1144	Os06t0726200-02	Similar to Chitinase 1.
Os03t0186600-01	MIKC_MADS	OS_LNC1144	Os12t0170800-01	Similar to Citrate binding protein precursor.
Os02t0807700-01	LSD	OS_LNC1144	Os12t0104800-01	Similar to Clathrin heavy chain.
Os11t0490900-01	WRKY	OS_LNC1144	Os08t0230200-01	Similar to cysteine-type endopeptidase/ ubiquitin thiolesterase.
MSTRG.14175.1	FAR1	OS_LNC1144	Os01t0728300-01	Similar to Cytochrome P450 monooxygenase CYP72A5.
Os01t0261200-01	NAC	OS_LNC1144	Os07t0635300-01	Similar to Cytochrome P450.
MSTRG.34499.2	bZIP	OS_LNC1144	Os02t0742500-01	Similar to DEGP9
Os03t0186600-01	MIKC_MADS	OS_LNC1144	Os02t0742500-01	Similar to DEGP9
MSTRG.34411.1	NAC	OS_LNC1144	Os02t0742500-01	Similar to DEGP9
MSTRG.26383.1	WRKY	OS_LNC1144	Os02t0742500-01	Similar to DEGP9
MSTRG.34411.1	NAC	OS_LNC1144	Os06t0499900-01	Similar to Dihydrolipoamide acetyltransferase subunit of PDC.
Os07t0684800-01	NAC	OS_LNC1144	Os01t0525800-01	Similar to DVL5.
MSTRG.34411.1	NAC	OS_LNC1144	Os05t0402900-01	Similar to EDGP.
Os01t0261200-01	NAC	OS_LNC1144	Os11t0141400-01	Similar to EF hand family protein, expressed.
Os01t0261200-01	NAC	OS_LNC1144	Os12t0138050-00	Similar to EF hand family protein, expressed.
MSTRG.34411.1	NAC	OS_LNC1144	Os03t0153400-01	Similar to EMB1374.
Os11t0490900-01	WRKY	OS_LNC1144	Os09t0277800-01	Similar to Enoyl-[acyl-carrier-protein] reductase [NADH], chloroplast precursor.
Os12t0152900-01	bZIP	OS_LNC1144	Os02t0570400-01	Similar to Ent-kaurene synthase 1A.
MSTRG.34499.2	bZIP	OS_LNC1144	Os02t0570400-01	Similar to Ent-kaurene synthase 1A.
Os01t0730700-01	WRKY	OS_LNC1144	Os02t0570400-01	Similar to Ent-kaurene synthase 1A.
Os01t0730700-01	WRKY	OS_LNC1144	Os12t0636400-01	Similar to Epoxide hydrolase 2.
Os07t0684800-01	NAC	OS_LNC1144	Os01t0837200-01	Similar to esterase/lipase/thioesterase family protein.
Os01t0730700-01	WRKY	OS_LNC1144	Os07t0475400-01	Similar to Expansin-like protein A.
MSTRG.34499.2	bZIP	OS_LNC1144	Os06t0598800-01	Similar to Fatty acid elongase 1-like protein.
Os01t0730700-01	WRKY	OS_LNC1144	Os06t0598800-01	Similar to Fatty acid elongase 1-like protein.
Os02t0807700-01	LSD	OS_LNC1144	Os07t0405100-01	Similar to F-box-like/WD-repeat protein ebi.
MSTRG.26383.1	WRKY	OS_LNC1144	Os03t0835900-01	Similar to Ferredoxin III, chloroplast precursor.
Os07t0667300-01	CO-like	OS_LNC1144	Os03t0367200-01	Similar to Flavonoid 3',5'-hydroxylase.
Os03t0186600-01	MIKC_MADS	OS_LNC1144	Os03t0367200-01	Similar to Flavonoid 3',5'-hydroxylase.
Os02t0807700-01	LSD	OS_LNC1144	Os01t0118000-01	Similar to Fructose-bisphosphate aldolase.
Os11t0490900-01	WRKY	OS_LNC1144	Os02t0763200-01	Similar to Galactoside 2-alpha-L-fucosyltransferase-fucosyltransferase).
Os07t0667300-01	CO-like	OS_LNC1144	Os05t0437700-01	Similar to G-box-binding factor 4.
Os11t0490900-01	WRKY	OS_LNC1144	Os03t0804500-01	Similar to Germin-like protein subfamily T member 1 precursor.
Os11t0490900-01	WRKY	OS_LNC1144	Os01t0940700-02	Similar to Glucan endo-1,3-beta-glucosidase GII precursor- beta-glucan endohydrolase GII)-beta-glucanase isoenzyme GII).
Os12t0152900-01	bZIP	OS_LNC1144	Os08t0187800-01	Similar to Glucose-6-phosphate/phosphate-translocator precursor.
Os01t0730700-01	WRKY	OS_LNC1144	Os09t0467200-01	Similar to Glutathione S-transferase GST 23.
MSTRG.34411.1	NAC	OS_LNC1144	Os10t0530900-01	Similar to Glutathione S-transferase GST 30.
Os12t0573200-01	GRAS	OS_LNC1144	Os10t0528100-01	Similar to Glutathione S-transferase GST 42.
Os07t0667300-01	CO-like	OS_LNC1144	Os04t0209300-01	Similar to Glutathione-conjugate transporter AtMRP4.
MSTRG.14175.1	FAR1	OS_LNC1144	Os04t0209300-01	Similar to Glutathione-conjugate transporter AtMRP4.
MSTRG.26383.1	WRKY	OS_LNC1144	Os04t0209300-01	Similar to Glutathione-conjugate transporter AtMRP4.
MSTRG.34499.2	bZIP	OS_LNC1144	Os06t0667600-01	Similar to Glycine decarboxylase complex H-protein.
Os12t0573200-01	GRAS	OS_LNC1144	Os06t0667600-01	Similar to Glycine decarboxylase complex H-protein.
Os12t0573200-01	GRAS	OS_LNC1144	Os01t0192500-00	Similar to H0525G02.3 protein.
Os01t0261200-01	NAC	OS_LNC1144	Os04t0669700-00	Similar to H0818H01.9 protein.
Os01t0261200-01	NAC	OS_LNC1144	Os06t0322400-00	Similar to H1005F08.15 protein.
Os01t0261200-01	NAC	OS_LNC1144	Os04t0666800-01	Similar to H1005F08.21 protein.
MSTRG.14175.1	FAR1	OS_LNC1144	Os01t0719700-00	Similar to HCF101
MSTRG.14175.1	FAR1	OS_LNC1144	Os09t0456800-01	Similar to Heat stress transcription factor Spl7.
Os12t0573200-01	GRAS	OS_LNC1144	Os12t0639600-02	Similar to Hedgehog-interacting-like protein.
MSTRG.14175.1	FAR1	OS_LNC1144	Os06t0591600-01	Similar to Hemoglobin Hb2.
MSTRG.14175.1	FAR1	OS_LNC1144	Os06t0152400-01	Similar to Hexaprenyldihydroxybenzoate methyltransferase, mitochondrial precursor.
MSTRG.34499.2	bZIP	OS_LNC1144	Os07t0106200-02	Similar to Hexose transporter.
MSTRG.26383.1	WRKY	OS_LNC1144	Os07t0106200-02	Similar to Hexose transporter.
Os11t0490900-01	WRKY	OS_LNC1144	Os11t0146550-00	Similar to holiday junction resolvase, S1x1p, URI domain nuclease.
Os07t0667300-01	CO-like	OS_LNC1144	Os06t0103300-01	Similar to Homogentisate 1,2-dioxygenase.
MSTRG.26383.1	WRKY	OS_LNC1144	Os06t0103300-01	Similar to Homogentisate 1,2-dioxygenase.
MSTRG.34411.1	NAC	OS_LNC1144	Os02t0611800-01	Similar to Hydroxyanthranilate hydroxycinnamoyltransferase 3.
Os03t0186600-01	MIKC_MADS	OS_LNC1144	Os11t0552600-01	Similar to Kinesin-like protein.
MSTRG.34411.1	NAC	OS_LNC1144	Os10t0442000-01	Similar to Lectin-like receptor kinase 7
Os12t0152900-01	bZIP	OS_LNC1144	Os08t0331900-01	Similar to Leucine Rich Repeat family protein, expressed.
MSTRG.14175.1	FAR1	OS_LNC1144	Os08t0331900-01	Similar to Leucine Rich Repeat family protein, expressed.
Os02t0807700-01	LSD	OS_LNC1144	Os01t0708500-01	Similar to lysine decarboxylase-like protein.
MSTRG.14175.1	FAR1	OS_LNC1144	Os06t0647400-02	Similar to Lysosomal Pro-X carboxypeptidase.
Os12t0573200-01	GRAS	OS_LNC1144	Os06t0647400-02	Similar to Lysosomal Pro-X carboxypeptidase.
Os03t0186600-01	MIKC_MADS	OS_LNC1144	Os01t0268100-01	Similar to Major facilitator superfamily antiporter.
Os11t0490900-01	WRKY	OS_LNC1144	Os05t0108300-01	Similar to MAP kinase-like protein.
Os12t0152900-01	bZIP	OS_LNC1144	Os03t0116400-01	Similar to Membrane protein.
Os11t0490900-01	WRKY	OS_LNC1144	Os02t0135200-00	Similar to Mitogen-activated protein kinase 13.
MSTRG.34499.2	bZIP	OS_LNC1144	Os08t0557600-01	Similar to Monodehydroascorbate reductase.
Os12t0152900-01	bZIP	OS_LNC1144	Os03t0277600-01	Similar to mRNA sequence.
Os11t0490900-01	WRKY	OS_LNC1144	Os03t0277600-01	Similar to mRNA sequence.
MSTRG.14175.1	FAR1	OS_LNC1144	Os04t0209200-01	Similar to MRP-like ABC transporter.
MSTRG.26383.1	WRKY	OS_LNC1144	Os04t0209200-01	Similar to MRP-like ABC transporter.
Os12t0573200-01	GRAS	OS_LNC1144	Os08t0458200-01	Similar to MTD1.
Os01t0730700-01	WRKY	OS_LNC1144	Os04t0438700-01	Similar to Muscleblind-like protein.
MSTRG.34411.1	NAC	OS_LNC1144	Os06t0637500-02	Similar to MYB transcription factor R2R3 type.
MSTRG.34499.2	bZIP	OS_LNC1144	Os06t0651100-02	Similar to NADPH HC toxin reductase.
MSTRG.34499.2	bZIP	OS_LNC1144	Os12t0610600-01	Similar to NAM / CUC2-like protein.
MSTRG.14175.1	FAR1	OS_LNC1144	Os03t0689833-00	Similar to NB-ARC domain containing protein, expressed.
Os01t0261200-01	NAC	OS_LNC1144	Os11t0485900-01	Similar to NB-ARC domain containing protein, expressed.
MSTRG.34411.1	NAC	OS_LNC1144	Os08t0470200-02	Similar to Nectarin III.
Os03t0186600-01	MIKC_MADS	OS_LNC1144	Os02t0302700-01	Similar to Nicotianamine aminotransferase A.
MSTRG.14175.1	FAR1	OS_LNC1144	Os04t0429800-01	Similar to Nicotinate phosphoribosyltransferase-like protein.
MSTRG.34499.2	bZIP	OS_LNC1144	Os04t0640900-01	Similar to ORW1943Ba0077G13.1 protein.
Os12t0152900-01	bZIP	OS_LNC1144	Os04t0474800-02	Similar to OSIGBa0135C13.7 protein.
Os01t0261200-01	NAC	OS_LNC1144	Os07t0438300-01	Similar to OSIGBa0153E02-OSIGBa0093I20.19 protein.
Os12t0152900-01	bZIP	OS_LNC1144	Os03t0663500-00	Similar to Osmotin precursor.
Os02t0807700-01	LSD	OS_LNC1144	Os10t0558700-02	Similar to Oxidoreductase, 2OG-Fe oxygenase family protein, expressed.
Os01t0261200-01	NAC	OS_LNC1144	Os10t0558700-02	Similar to Oxidoreductase, 2OG-Fe oxygenase family protein, expressed.
Os07t0667300-01	CO-like	OS_LNC1144	Os07t0663800-01	Similar to Oxidoreductase, short chain dehydrogenase/reductase family protein, expressed.
Os12t0152900-01	bZIP	OS_LNC1144	Os09t0524500-01	Similar to Oxidoreductase, short chain dehydrogenase/reductase family protein, expressed.
Os12t0152900-01	bZIP	OS_LNC1144	Os01t0248500-01	Similar to Pathogen-related protein.
Os12t0152900-01	bZIP	OS_LNC1144	Os03t0158900-00	Similar to Pentatricopeptide repeat-containing protein.
MSTRG.34411.1	NAC	OS_LNC1144	Os01t0962700-01	Similar to Peroxidase 12 precursor.
MSTRG.34411.1	NAC	OS_LNC1144	Os01t0963000-04	Similar to Peroxidase BP 1 precursor.
Os07t0667300-01	CO-like	OS_LNC1144	Os12t0105600-01	Similar to Phosphate starvation regulator protein.
MSTRG.34499.2	bZIP	OS_LNC1144	Os03t0280400-01	Similar to plant-specific domain TIGR01589 family protein.
Os12t0573200-01	GRAS	OS_LNC1144	Os03t0280400-01	Similar to plant-specific domain TIGR01589 family protein.
MSTRG.26383.1	WRKY	OS_LNC1144	Os03t0280400-01	Similar to plant-specific domain TIGR01589 family protein.
Os01t0730700-01	WRKY	OS_LNC1144	Os02t0470400-00	Similar to predicted protein.
Os01t0261200-01	NAC	OS_LNC1144	Os03t0626500-00	Similar to predicted protein.
Os02t0807700-01	LSD	OS_LNC1144	Os03t0693000-01	Similar to predicted protein.
MSTRG.34499.2	bZIP	OS_LNC1144	Os08t0374701-01	Similar to Protein kinase domain containing protein, expressed.
Os11t0490900-01	WRKY	OS_LNC1144	Os08t0374701-01	Similar to Protein kinase domain containing protein, expressed.
MSTRG.34499.2	bZIP	OS_LNC1144	Os10t0571300-01	Similar to Protein kinase-like protein.
MSTRG.34499.2	bZIP	OS_LNC1144	Os03t0207400-01	Similar to Protein phosphatase 2C-like.
Os12t0152900-01	bZIP	OS_LNC1144	Os03t0734300-01	Similar to Proteinase inhibitor type II CEVI57 precursor.
MSTRG.34499.2	bZIP	OS_LNC1144	Os07t0582400-01	Similar to Proton myo-inositol cotransporter.
Os12t0152900-01	bZIP	OS_LNC1144	Os09t0467300-02	Similar to PUP1.
Os01t0261200-01	NAC	OS_LNC1144	Os05t0501400-01	Similar to Receptor-like protein kinase 5.
MSTRG.14175.1	FAR1	OS_LNC1144	Os07t0550900-01	Similar to Receptor-like protein kinase 6.
Os01t0730700-01	WRKY	OS_LNC1144	Os07t0550900-01	Similar to Receptor-like protein kinase 6.
Os01t0261200-01	NAC	OS_LNC1144	Os07t0130100-01	Similar to Resistance protein candidate.
Os12t0152900-01	bZIP	OS_LNC1144	Os02t0175100-01	Similar to RISBZ4.
MSTRG.34499.2	bZIP	OS_LNC1144	Os12t0117700-01	Similar to RNA binding protein.
Os12t0573200-01	GRAS	OS_LNC1144	Os04t0472400-00	Similar to RNA recognition motif family protein.
Os12t0152900-01	bZIP	OS_LNC1144	Os01t0323600-01	Similar to S-adenosylmethionine synthase 2.
Os11t0490900-01	WRKY	OS_LNC1144	Os01t0323600-01	Similar to S-adenosylmethionine synthase 2.
Os07t0684800-01	NAC	OS_LNC1144	Os12t0543600-00	Similar to sarcosine oxidase.
MSTRG.34411.1	NAC	OS_LNC1144	Os01t0642801-00	Similar to S-domain class receptor-like kinase3.
Os11t0490900-01	WRKY	OS_LNC1144	Os07t0678600-01	Similar to Serine/threonine protein kinase.
MSTRG.34499.2	bZIP	OS_LNC1144	Os03t0167700-01	Similar to Serine/threonine protein phosphatase PP2A-3 catalytic subunit.
MSTRG.34499.2	bZIP	OS_LNC1144	Os06t0225300-02	Similar to SERK1.
MSTRG.34411.1	NAC	OS_LNC1144	Os02t0562600-01	Similar to Seven trans-membrane protein.
Os01t0261200-01	NAC	OS_LNC1144	Os05t0509500-01	Similar to Signal recognition particle 54 kDa protein 2.
Os12t0152900-01	bZIP	OS_LNC1144	Os08t0323266-00	Similar to Signal recognition particle 68 kDa protein.
MSTRG.34499.2	bZIP	OS_LNC1144	Os03t0197200-01	Similar to Sorbitol transporter.
Os12t0152900-01	bZIP	OS_LNC1144	Os05t0182600-01	Similar to SSRP1 protein.
Os07t0684800-01	NAC	OS_LNC1144	Os05t0182600-01	Similar to SSRP1 protein.
MSTRG.26383.1	WRKY	OS_LNC1144	Os01t0795400-01	Similar to Subtilase.
Os03t0186600-01	MIKC_MADS	OS_LNC1144	Os12t0628600-01	Similar to Thaumatin-like pathogenesis-related protein 3 precursor.
Os02t0807700-01	LSD	OS_LNC1144	Os06t0166400-01	Similar to TINY-like protein.
MSTRG.34411.1	NAC	OS_LNC1144	Os07t0108200-00	Similar to transparent testa 12 protein.
Os11t0490900-01	WRKY	OS_LNC1144	Os03t0315400-01	Similar to Typical P-type R2R3 Myb protein.
Os07t0667300-01	CO-like	OS_LNC1144	Os09t0483400-01	Similar to Ubiquitin/ribosomal fusion protein.
Os03t0186600-01	MIKC_MADS	OS_LNC1144	Os04t0643100-02	Similar to Vacuolar ATP synthase subunit D.
Os11t0490900-01	WRKY	OS_LNC1144	Os07t0680000-01	Similar to Vacuolar sorting receptor 1 precursor.
Os01t0261200-01	NAC	OS_LNC1144	Os09t0247700-01	Similar to Zinc finger, ZZ-type
Os01t0730700-01	WRKY	OS_LNC1144	Os09t0247700-01	Similar to Zinc finger, ZZ-type
Os01t0261200-01	NAC	OS_LNC1144	Os03t0307400-01	Six-bladed beta-propeller, TolB-like domain containing protein.
MSTRG.34411.1	NAC	OS_LNC1144	Os03t0750700-01	Six-bladed beta-propeller, TolB-like domain containing protein.
Os11t0490900-01	WRKY	OS_LNC1144	Os06t0572400-01	Tetraspanin domain containing protein.
MSTRG.34411.1	NAC	OS_LNC1144	Os08t0260600-01	Tetraspanin domain containing protein.
MSTRG.26383.1	WRKY	OS_LNC1144	Os06t0159600-01	Tetratricopeptide-like helical domain containing protein.
MSTRG.14175.1	FAR1	OS_LNC1144	Os10t0576600-01	Tetratricopeptide-like helical domain containing protein.
MSTRG.26383.1	WRKY	OS_LNC1144	Os10t0576600-01	Tetratricopeptide-like helical domain containing protein.
Os11t0490900-01	WRKY	OS_LNC1144	Os10t0576600-01	Tetratricopeptide-like helical domain containing protein.
Os02t0807700-01	LSD	OS_LNC1144	Os12t0636100-01	Tetratricopeptide-like helical domain containing protein.
MSTRG.34499.2	bZIP	OS_LNC1144	Os07t0615200-01	Tify domain containing protein.
Os01t0261200-01	NAC	OS_LNC1144	Os08t0428400-01	Tify domain containing protein.
Os07t0667300-01	CO-like	OS_LNC1144	Os07t0580500-01	Transcription factor, Brassinosteroid-regulated growth response, Feedback inhibition of BR biosynthesis
MSTRG.26383.1	WRKY	OS_LNC1144	Os05t0164800-02	Transition metal ion transporter, Ion transport
Os07t0684800-01	NAC	OS_LNC1144	Os03t0833200-01	tRNA nucleoside methyltransferase, Methyltransferase for the 2'-O-methyladenosine nucleoside modification, Regulation of salt stress tolerance, ABA hormone response
MSTRG.34499.2	bZIP	OS_LNC1144	Os09t0442400-01	t-snare domain containing protein.
Os12t0573200-01	GRAS	OS_LNC1144	Os03t0125700-01	Ubiquitin ligase, Det1/DDB1-complexing domain containing protein.
Os01t0730700-01	WRKY	OS_LNC1144	Os01t0597800-01	UDP-glucuronosyl/UDP-glucosyltransferase family protein.
Os07t0667300-01	CO-like	OS_LNC1144	Os01t0734800-01	UDP-glucuronosyl/UDP-glucosyltransferase family protein.
MSTRG.34411.1	NAC	OS_LNC1144	Os01t0735900-01	UDP-glucuronosyl/UDP-glucosyltransferase family protein.
Os01t0261200-01	NAC	OS_LNC1144	Os04t0206700-01	UDP-glucuronosyl/UDP-glucosyltransferase family protein.
MSTRG.14175.1	FAR1	OS_LNC1144	Os09t0482900-01	UDP-glucuronosyl/UDP-glucosyltransferase family protein.
Os11t0490900-01	WRKY	OS_LNC1144	Os09t0482900-01	UDP-glucuronosyl/UDP-glucosyltransferase family protein.
Os07t0667300-01	CO-like	OS_LNC1144	Os06t0567000-01	Uncharacterised protein family UPF0197 domain containing protein.
Os07t0667300-01	CO-like	OS_LNC1144	Os07t0442900-01	Uncharacterised protein family UPF0497, trans-membrane plant subgroup domain containing protein.
Os07t0667300-01	CO-like	OS_LNC1144	Os01t0511100-01	UspA domain containing protein.
MSTRG.26383.1	WRKY	OS_LNC1144	Os01t0511100-01	UspA domain containing protein.
Os01t0261200-01	NAC	OS_LNC1144	Os07t0657200-02	WD40/YVTN repeat-like domain containing protein.
Os11t0490900-01	WRKY	OS_LNC1144	Os09t0417600-02	WRKY transcription factor, Transcriptional repressor, Pathogen defense
Os01t0730700-01	WRKY	OS_LNC1144	Os09t0417600-02	WRKY transcription factor, Transcriptional repressor, Pathogen defense
Os12t0152900-01	bZIP	OS_LNC1144	Os02t0275200-01	Xyloglucan fucosyltransferase family protein.
Os02t0807700-01	LSD	OS_LNC1144	Os02t0530300-01	Zinc finger, AN1-type domain containing protein.
MSTRG.34499.2	bZIP	OS_LNC1144	Os03t0610400-01	Zinc finger, C2H2-like domain containing protein.
Os02t0807700-01	LSD	OS_LNC1144	Os02t0738200-01	Zinc finger, RING/FYVE/PHD-type domain containing protein.
Os03t0186600-01	MIKC_MADS	OS_LNC1144	Os03t0377600-01	Zinc finger, RING/FYVE/PHD-type domain containing protein.
Os07t0667300-01	CO-like	OS_LNC1144	Os06t0608800-04	Zinc finger, RING/FYVE/PHD-type domain containing protein.
Os07t0667300-01	CO-like	OS_LNC1144	Os07t0686300-01	Zinc finger, RING/FYVE/PHD-type domain containing protein.
Os12t0152900-01	bZIP	OS_LNC1144	Os09t0505000-00	Zinc finger, RING/FYVE/PHD-type domain containing protein.
Os01t0261200-01	NAC	OS_LNC1144	Os10t0552400-01	Zinc finger, RING/FYVE/PHD-type domain containing protein.
MSTRG.34411.1	NAC	OS_LNC1144	Os06t0218300-01	Zinc finger, RING-type domain containing protein.
Os11t0490900-01	WRKY	OS_LNC1144	Os09t0434900-02	Zinc finger, RING-type domain containing protein.
MSTRG.14175.1	FAR1	OS_LNC1395	Os01t0830500-01	2OG-Fe(II) oxygenase domain containing protein.
MSTRG.14175.1	FAR1	OS_LNC1395	Os02t0139100-01	Activator of Hsp90 ATPase, N-terminal domain containing protein.
Os12t0573200-01	GRAS	OS_LNC1395	Os03t0790500-01	Alpha/beta hydrolase fold-3 domain containing protein.
MSTRG.14175.1	FAR1	OS_LNC1395	Os07t0192000-01	ATPase, AAA-type, core domain containing protein.
Os12t0573200-01	GRAS	OS_LNC1395	Os08t0379200-01	ATPase, P-type, K/Mg/Cd/Cu/Zn/Na/Ca/Na/H-transporter family protein.
Os01t0675800-01	NAC	OS_LNC1395	Os08t0485800-01	Barwin-related endoglucanase domain containing protein.
MSTRG.14175.1	FAR1	OS_LNC1395	Os08t0157500-01	Caffeic acid O-methyltransferase, Flavonoid 3'-O-methyltransferase, Melatonin biosynthesis, Tricin biosynthesis
MSTRG.14175.1	FAR1	OS_LNC1395	Os02t0753800-01	Calcium-binding protein, Annexin, Heat and drought stress tolerance
Os12t0573200-01	GRAS	OS_LNC1395	Os03t0688300-01	Calcium-dependent protein kinase, Positive regulator of drought stress tolerance and spikelet fertility
MSTRG.14175.1	FAR1	OS_LNC1395	Os01t0346600-01	Conserved hypothetical protein.
Os01t0675800-01	NAC	OS_LNC1395	Os02t0264300-01	Conserved hypothetical protein.
Os01t0675800-01	NAC	OS_LNC1395	Os02t0761500-01	Conserved hypothetical protein.
Os01t0675800-01	NAC	OS_LNC1395	Os03t0170100-00	Conserved hypothetical protein.
MSTRG.14175.1	FAR1	OS_LNC1395	Os03t0349600-03	Conserved hypothetical protein.
Os12t0573200-01	GRAS	OS_LNC1395	Os03t0351700-01	Conserved hypothetical protein.
Os12t0573200-01	GRAS	OS_LNC1395	Os05t0349400-01	Conserved hypothetical protein.
Os01t0675800-01	NAC	OS_LNC1395	Os06t0133500-00	Conserved hypothetical protein.
MSTRG.14175.1	FAR1	OS_LNC1395	Os06t0147400-01	Conserved hypothetical protein.
Os01t0675800-01	NAC	OS_LNC1395	Os06t0711200-01	Conserved hypothetical protein.
MSTRG.14175.1	FAR1	OS_LNC1395	Os08t0416800-01	Conserved hypothetical protein.
Os12t0573200-01	GRAS	OS_LNC1395	Os09t0120100-00	Conserved hypothetical protein.
MSTRG.14175.1	FAR1	OS_LNC1395	Os10t0491400-01	Conserved hypothetical protein.
Os12t0573200-01	GRAS	OS_LNC1395	Os10t0394400-01	Disease resistance protein domain containing protein.
Os01t0675800-01	NAC	OS_LNC1395	Os01t0135700-01	EF-HAND 2 domain containing protein.
Os12t0573200-01	GRAS	OS_LNC1395	Os06t0694200-01	Esterase, SGNH hydrolase-type domain containing protein.
Os01t0675800-01	NAC	OS_LNC1395	Os09t0394300-01	Glycoside hydrolase, family 9 protein.
MSTRG.14175.1	FAR1	OS_LNC1395	Os09t0452900-01	Glycosyl transferase, family 31 protein.
Os12t0573200-01	GRAS	OS_LNC1395	Os11t0124900-01	Glycosyl transferase, family 8 protein.
Os12t0573200-01	GRAS	OS_LNC1395	Os03t0737300-01	HAD-superfamily phosphatase, subfamily IIIC domain containing protein.
Os12t0573200-01	GRAS	OS_LNC1395	Os04t0685400-02	Harpin-induced 1 domain containing protein.
Os01t0675800-01	NAC	OS_LNC1395	Os12t0127200-01	Harpin-induced 1 domain containing protein.
Os12t0573200-01	GRAS	OS_LNC1395	Os07t0274700-01	HvB12D protein.
Os01t0675800-01	NAC	OS_LNC1395	Os01t0681600-02	Hypothetical conserved gene.
Os12t0573200-01	GRAS	OS_LNC1395	Os01t0742766-01	Hypothetical conserved gene.
Os01t0675800-01	NAC	OS_LNC1395	Os02t0156600-00	Hypothetical conserved gene.
Os01t0675800-01	NAC	OS_LNC1395	Os04t0219200-01	Hypothetical conserved gene.
Os12t0573200-01	GRAS	OS_LNC1395	Os08t0355500-03	Hypothetical conserved gene.
Os01t0675800-01	NAC	OS_LNC1395	Os11t0213900-01	Hypothetical conserved gene.
Os01t0675800-01	NAC	OS_LNC1395	Os11t0274700-01	Hypothetical conserved gene.
Os12t0573200-01	GRAS	OS_LNC1395	Os09t0100750-01	Hypothetical gene.
Os12t0573200-01	GRAS	OS_LNC1395	Os09t0397800-01	Hypothetical gene.
MSTRG.14175.1	FAR1	OS_LNC1395	Os01t0848475-00	Hypothetical protein.
Os01t0675800-01	NAC	OS_LNC1395	Os02t0181200-00	Hypothetical protein.
Os01t0675800-01	NAC	OS_LNC1395	Os02t0675000-01	Hypothetical protein.
Os12t0573200-01	GRAS	OS_LNC1395	Os03t0237201-00	Hypothetical protein.
Os01t0675800-01	NAC	OS_LNC1395	Os04t0205101-00	Hypothetical protein.
Os04t0532800-01	MYB	OS_LNC1395	Os05t0119100-01	Hypothetical protein.
MSTRG.14175.1	FAR1	OS_LNC1395	Os07t0669675-00	Hypothetical protein.
Os04t0532800-01	MYB	OS_LNC1395	Os08t0165800-00	Hypothetical protein.
Os12t0573200-01	GRAS	OS_LNC1395	Os10t0456000-01	Hypothetical protein.
MSTRG.14175.1	FAR1	OS_LNC1395	Os10t0558850-00	Hypothetical protein.
MSTRG.14175.1	FAR1	OS_LNC1395	Os01t0188100-01	Isopenicillin N synthase family protein.
MSTRG.14175.1	FAR1	OS_LNC1395	Os11t0615000-01	LNS2, Lipin/Ned1/Smp2 domain containing protein.
Os01t0675800-01	NAC	OS_LNC1395	Os08t0180000-02	mRNA capping enzyme, large subunit family protein.
Os01t0675800-01	NAC	OS_LNC1395	Os03t0327800-01	NAC Family transcriptional activator, Abiotic stress response, Positive regulator of leaf senescence
Os04t0532800-01	MYB	OS_LNC1395	Os03t0589300-01	Ovarian tumour, otubain domain containing protein.
Os01t0675800-01	NAC	OS_LNC1395	Os03t0589300-01	Ovarian tumour, otubain domain containing protein.
Os12t0573200-01	GRAS	OS_LNC1395	Os09t0482500-01	Peptidase A1 domain containing protein.
Os12t0573200-01	GRAS	OS_LNC1395	Os05t0593000-01	Phospholipase A2, active site domain containing protein.
MSTRG.14175.1	FAR1	OS_LNC1395	Os04t0406600-01	Prephenate dehydratase domain containing protein.
Os12t0573200-01	GRAS	OS_LNC1395	Os02t0153900-01	Protein kinase, core domain containing protein.
MSTRG.14175.1	FAR1	OS_LNC1395	Os11t0541600-00	Protein of unknown function DUF247, plant domain containing protein.
Os12t0573200-01	GRAS	OS_LNC1395	Os11t0690066-00	Serine/threonine protein kinase domain containing protein.
MSTRG.14175.1	FAR1	OS_LNC1395	Os01t0974900-00	Similar to 26S proteasome non-ATPase regulatory subunit 6.
Os04t0532800-01	MYB	OS_LNC1395	Os07t0109300-00	Similar to 36I5.7.
Os12t0573200-01	GRAS	OS_LNC1395	Os02t0235600-01	Similar to 60S ribosomal protein L11-2. Splice isoform 2.
Os04t0532800-01	MYB	OS_LNC1395	Os11t0170000-01	Similar to Amidase family protein, expressed.
MSTRG.14175.1	FAR1	OS_LNC1395	Os04t0630800-01	Similar to Anthocyanidin reductase.
Os12t0573200-01	GRAS	OS_LNC1395	Os03t0718000-01	Similar to Anthranilate synthase beta chain.
Os04t0532800-01	MYB	OS_LNC1395	Os12t0129350-00	Similar to Arabinoxylan arabinofuranohydrolase isoenzyme AXAH-I.
Os01t0675800-01	NAC	OS_LNC1395	Os01t0190300-01	Similar to Auxin-responsive protein IAA26.
Os01t0675800-01	NAC	OS_LNC1395	Os01t0714600-01	Similar to cDNA clone:J023088C01, full insert sequence.
Os12t0573200-01	GRAS	OS_LNC1395	Os06t0726200-02	Similar to Chitinase 1.
MSTRG.14175.1	FAR1	OS_LNC1395	Os01t0728300-01	Similar to Cytochrome P450 monooxygenase CYP72A5.
Os01t0675800-01	NAC	OS_LNC1395	Os06t0247800-01	Similar to Dynamin-like protein.
Os01t0675800-01	NAC	OS_LNC1395	Os07t0475400-01	Similar to Expansin-like protein A.
Os12t0573200-01	GRAS	OS_LNC1395	Os10t0528100-01	Similar to Glutathione S-transferase GST 42.
Os01t0675800-01	NAC	OS_LNC1395	Os01t0369700-03	Similar to Glutathione S-transferase GST 8.
MSTRG.14175.1	FAR1	OS_LNC1395	Os04t0209300-01	Similar to Glutathione-conjugate transporter AtMRP4.
Os12t0573200-01	GRAS	OS_LNC1395	Os06t0667600-01	Similar to Glycine decarboxylase complex H-protein.
Os12t0573200-01	GRAS	OS_LNC1395	Os01t0192500-00	Similar to H0525G02.3 protein.
MSTRG.14175.1	FAR1	OS_LNC1395	Os01t0719700-00	Similar to HCF101
MSTRG.14175.1	FAR1	OS_LNC1395	Os09t0456800-01	Similar to Heat stress transcription factor Spl7.
Os12t0573200-01	GRAS	OS_LNC1395	Os12t0639600-02	Similar to Hedgehog-interacting-like protein.
MSTRG.14175.1	FAR1	OS_LNC1395	Os06t0591600-01	Similar to Hemoglobin Hb2.
Os04t0532800-01	MYB	OS_LNC1395	Os06t0652200-01	Similar to Hemolysin-III related family protein.
MSTRG.14175.1	FAR1	OS_LNC1395	Os06t0152400-01	Similar to Hexaprenyldihydroxybenzoate methyltransferase, mitochondrial precursor.
Os01t0675800-01	NAC	OS_LNC1395	Os01t0190400-01	Similar to Hexokinase.
MSTRG.14175.1	FAR1	OS_LNC1395	Os08t0331900-01	Similar to Leucine Rich Repeat family protein, expressed.
MSTRG.14175.1	FAR1	OS_LNC1395	Os06t0647400-02	Similar to Lysosomal Pro-X carboxypeptidase.
Os12t0573200-01	GRAS	OS_LNC1395	Os06t0647400-02	Similar to Lysosomal Pro-X carboxypeptidase.
Os04t0532800-01	MYB	OS_LNC1395	Os06t0251000-01	Similar to mitochondrion protein.
MSTRG.14175.1	FAR1	OS_LNC1395	Os04t0209200-01	Similar to MRP-like ABC transporter.
Os12t0573200-01	GRAS	OS_LNC1395	Os08t0458200-01	Similar to MTD1.
Os04t0532800-01	MYB	OS_LNC1395	Os07t0598000-02	Similar to NADPH HC toxin reductase.
Os01t0675800-01	NAC	OS_LNC1395	Os12t0610600-01	Similar to NAM / CUC2-like protein.
MSTRG.14175.1	FAR1	OS_LNC1395	Os03t0689833-00	Similar to NB-ARC domain containing protein, expressed.
MSTRG.14175.1	FAR1	OS_LNC1395	Os04t0429800-01	Similar to Nicotinate phosphoribosyltransferase-like protein.
Os04t0532800-01	MYB	OS_LNC1395	Os06t0255400-01	Similar to Nudix hydrolase 18, mitochondrial precursor.
Os01t0675800-01	NAC	OS_LNC1395	Os06t0255400-01	Similar to Nudix hydrolase 18, mitochondrial precursor.
Os01t0675800-01	NAC	OS_LNC1395	Os01t0963000-04	Similar to Peroxidase BP 1 precursor.
Os01t0675800-01	NAC	OS_LNC1395	Os03t0101500-01	Similar to Phosphoglycerate mutase family protein.
Os12t0573200-01	GRAS	OS_LNC1395	Os03t0280400-01	Similar to plant-specific domain TIGR01589 family protein.
Os04t0532800-01	MYB	OS_LNC1395	Os02t0470400-00	Similar to predicted protein.
Os01t0675800-01	NAC	OS_LNC1395	Os02t0470400-00	Similar to predicted protein.
Os04t0532800-01	MYB	OS_LNC1395	Os09t0509200-01	Similar to Pyruvate dehydrogenase E1 beta subunit isoform 3.
Os04t0532800-01	MYB	OS_LNC1395	Os01t0116800-00	Similar to Receptor-like kinase.
MSTRG.14175.1	FAR1	OS_LNC1395	Os07t0550900-01	Similar to Receptor-like protein kinase 6.
Os01t0675800-01	NAC	OS_LNC1395	Os06t0192800-01	Similar to RING-H2 finger protein ATL1R.
Os12t0573200-01	GRAS	OS_LNC1395	Os04t0472400-00	Similar to RNA recognition motif family protein.
Os04t0532800-01	MYB	OS_LNC1395	Os12t0543600-00	Similar to sarcosine oxidase.
Os04t0532800-01	MYB	OS_LNC1395	Os06t0671700-01	Similar to toprim domain-containing protein.
Os01t0675800-01	NAC	OS_LNC1395	Os08t0562800-01	Similar to Transparent testa 12 protein.
Os01t0675800-01	NAC	OS_LNC1395	Os04t0643100-02	Similar to Vacuolar ATP synthase subunit D.
Os01t0675800-01	NAC	OS_LNC1395	Os10t0481400-02	Similar to Zinc finger, C3HC4 type family protein, expressed.
Os01t0675800-01	NAC	OS_LNC1395	Os10t0543500-01	Six-bladed beta-propeller, TolB-like domain containing protein.
Os01t0675800-01	NAC	OS_LNC1395	Os06t0683400-02	Small calcium-binding protein with one EF-hand motif, Positive regulation of osmotic and salt tolerance
Os01t0675800-01	NAC	OS_LNC1395	Os03t0719100-01	SUMO E3-ligase, Abiotic stress response, Stress adaptation
MSTRG.14175.1	FAR1	OS_LNC1395	Os10t0576600-01	Tetratricopeptide-like helical domain containing protein.
Os12t0573200-01	GRAS	OS_LNC1395	Os03t0125700-01	Ubiquitin ligase, Det1/DDB1-complexing domain containing protein.
MSTRG.14175.1	FAR1	OS_LNC1395	Os09t0482900-01	UDP-glucuronosyl/UDP-glucosyltransferase family protein.
MSTRG.16497.3	SBP	OS_LNC1512	Os04t0683700-01	4-coumarate-Co-A ligase like protein, Adenosine monophosphate binding protein, Regulation of rice blast resistance, floret development, and lignin biosynthesis
MSTRG.3867.2	WRKY	OS_LNC1512	Os03t0141000-01	60S ribosomal protein L21.
Os02t0557500-01	C3H	OS_LNC1512	Os07t0124900-01	Allergen V5/Tpx-1 related family protein.
MSTRG.16497.3	SBP	OS_LNC1512	Os07t0124900-01	Allergen V5/Tpx-1 related family protein.
MSTRG.9896.1	bZIP	OS_LNC1512	Os02t0831300-01	Armadillo-type fold domain containing protein.
Os08t0369600-01	CPP	OS_LNC1512	Os08t0485800-01	Barwin-related endoglucanase domain containing protein.
Os08t0369600-01	CPP	OS_LNC1512	Os02t0125300-01	Bax inhibitor-1.
MSTRG.16497.3	SBP	OS_LNC1512	Os02t0125300-01	Bax inhibitor-1.
MSTRG.16497.3	SBP	OS_LNC1512	Os01t0685100-02	Conserved hypothetical protein.
Os08t0369600-01	CPP	OS_LNC1512	Os01t0767600-01	Conserved hypothetical protein.
Os08t0369600-01	CPP	OS_LNC1512	Os01t0962100-01	Conserved hypothetical protein.
MSTRG.16497.3	SBP	OS_LNC1512	Os02t0282600-01	Conserved hypothetical protein.
MSTRG.9896.1	bZIP	OS_LNC1512	Os02t0593400-03	Conserved hypothetical protein.
MSTRG.9896.1	bZIP	OS_LNC1512	Os02t0741400-01	Conserved hypothetical protein.
Os08t0369600-01	CPP	OS_LNC1512	Os03t0762500-01	Conserved hypothetical protein.
Os02t0557500-01	C3H	OS_LNC1512	Os05t0357850-01	Conserved hypothetical protein.
MSTRG.16497.3	SBP	OS_LNC1512	Os05t0357850-01	Conserved hypothetical protein.
Os08t0369600-01	CPP	OS_LNC1512	Os06t0711000-01	Conserved hypothetical protein.
MSTRG.16497.3	SBP	OS_LNC1512	Os07t0648300-01	Conserved hypothetical protein.
Os08t0369600-01	CPP	OS_LNC1512	Os11t0429000-01	Conserved hypothetical protein.
MSTRG.9896.1	bZIP	OS_LNC1512	Os09t0437500-01	Dormancyauxin associated family protein.
Os08t0369600-01	CPP	OS_LNC1512	Os04t0227500-01	DSBA oxidoreductase family protein.
Os02t0557500-01	C3H	OS_LNC1512	Os12t0444500-01	EGF-like region, conserved site domain containing protein.
MSTRG.16497.3	SBP	OS_LNC1512	Os03t0728500-01	Forkhead-associated domain containing protein.
MSTRG.9896.1	bZIP	OS_LNC1512	Os01t0897600-01	Glycoside hydrolase, family 1 protein.
Os02t0557500-01	C3H	OS_LNC1512	Os04t0556000-01	Heavy metal P-type ATPase, Xylem loading of copper
MSTRG.16497.3	SBP	OS_LNC1512	Os03t0124000-01	Homeodomain-related domain containing protein.
MSTRG.16497.3	SBP	OS_LNC1512	Os03t0431600-00	Hypothetical conserved gene.
MSTRG.3867.2	WRKY	OS_LNC1512	Os05t0297850-01	Hypothetical conserved gene.
Os08t0369600-01	CPP	OS_LNC1512	Os05t0500700-00	Hypothetical conserved gene.
Os02t0557500-01	C3H	OS_LNC1512	Os07t0598700-00	Hypothetical conserved gene.
Os08t0369600-01	CPP	OS_LNC1512	Os11t0551900-01	Hypothetical conserved gene.
MSTRG.9896.1	bZIP	OS_LNC1512	Os09t0100750-01	Hypothetical gene.
MSTRG.9896.1	bZIP	OS_LNC1512	Os03t0237201-00	Hypothetical protein.
Os08t0369600-01	CPP	OS_LNC1512	Os03t0267100-01	Hypothetical protein.
MSTRG.3867.2	WRKY	OS_LNC1512	Os09t0361500-01	Isochorismate synthase domain containing protein.
MSTRG.9896.1	bZIP	OS_LNC1512	Os10t0516800-01	Long-chain base kinase, Regulation of disease resistance response and programmed cell death
Os02t0557500-01	C3H	OS_LNC1512	Os10t0516800-01	Long-chain base kinase, Regulation of disease resistance response and programmed cell death
Os02t0557500-01	C3H	OS_LNC1512	Os02t0732700-01	Mediator complex, subunit Med23 domain containing protein.
Os02t0557500-01	C3H	OS_LNC1512	Os01t0667200-02	Mitochondrial sulfur dioxygenase, Abiotic stress response
Os02t0557500-01	C3H	OS_LNC1512	Os01t0846000-01	Nucleic acid-binding, OB-fold domain containing protein.
Os08t0369600-01	CPP	OS_LNC1512	Os01t0846000-01	Nucleic acid-binding, OB-fold domain containing protein.
MSTRG.16497.3	SBP	OS_LNC1512	Os03t0203100-01	Nucleolar 27S pre-rRNA processing, Urb2/Npa2, C-terminal domain containing protein.
MSTRG.9896.1	bZIP	OS_LNC1512	Os01t0170800-01	Pentatricopeptide repeat domain containing protein.
Os02t0557500-01	C3H	OS_LNC1512	Os10t0444700-02	Phosphate transporter, Pi homeostasis
MSTRG.16497.3	SBP	OS_LNC1512	Os10t0444700-02	Phosphate transporter, Pi homeostasis
MSTRG.9896.1	bZIP	OS_LNC1512	Os05t0502200-01	Phospholipid/glycerol acyltransferase domain containing protein.
MSTRG.9896.1	bZIP	OS_LNC1512	Os03t0777500-01	Protein of unknown function DUF1068 family protein.
MSTRG.16497.3	SBP	OS_LNC1512	Os10t0479800-01	Protein of unknown function DUF1336 domain containing protein.
MSTRG.9896.1	bZIP	OS_LNC1512	Os05t0531100-01	Protein of unknown function DUF584 family protein.
MSTRG.3867.2	WRKY	OS_LNC1512	Os02t0471500-01	Protein phosphatase 2C domain containing protein.
Os08t0369600-01	CPP	OS_LNC1512	Os06t0698300-01	Protein phosphatase 2C family protein.
Os02t0557500-01	C3H	OS_LNC1512	Os04t0271200-01	Protein-tyrosine phosphatase-like, PTPLA domain containing protein.
MSTRG.9896.1	bZIP	OS_LNC1512	Os02t0658400-01	Remorin, C-terminal domain containing protein.
MSTRG.9896.1	bZIP	OS_LNC1512	Os06t0198500-00	RmlC-like jelly roll fold domain containing protein.
Os02t0557500-01	C3H	OS_LNC1512	Os03t0319400-01	Serine/threonine protein kinase, Cold stress tolerance, Abiotic stresses
Os08t0369600-01	CPP	OS_LNC1512	Os03t0319400-01	Serine/threonine protein kinase, Cold stress tolerance, Abiotic stresses
Os02t0557500-01	C3H	OS_LNC1512	Os02t0784700-00	Similar to 26S protease regulatory subunit 7.
MSTRG.16497.3	SBP	OS_LNC1512	Os02t0784700-00	Similar to 26S protease regulatory subunit 7.
MSTRG.9896.1	bZIP	OS_LNC1512	Os03t0436400-03	Similar to A.thaliana gene induced upon wounding stress.
Os02t0557500-01	C3H	OS_LNC1512	Os02t0833100-01	Similar to antiporter/ drug transporter.
MSTRG.9896.1	bZIP	OS_LNC1512	Os07t0608900-01	Similar to cDNA clone:001-031-A11, full insert sequence.
MSTRG.9896.1	bZIP	OS_LNC1512	Os04t0573900-01	Similar to cDNA clone:001-036-C03, full insert sequence.
Os02t0557500-01	C3H	OS_LNC1512	Os07t0660000-00	Similar to cDNA clone:J013120J20, full insert sequence.
MSTRG.16497.3	SBP	OS_LNC1512	Os01t0686000-01	Similar to cDNA, clone: J100026I16, full insert sequence.
MSTRG.9896.1	bZIP	OS_LNC1512	Os06t0495100-00	Similar to cDNA, clone: J100088H20, full insert sequence.
MSTRG.9896.1	bZIP	OS_LNC1512	Os06t0237800-01	Similar to chaperone protein dnaJ 16.
Os02t0557500-01	C3H	OS_LNC1512	Os03t0711400-01	Similar to Coatomer alpha subunit.
MSTRG.16497.3	SBP	OS_LNC1512	Os03t0711400-01	Similar to Coatomer alpha subunit.
Os02t0557500-01	C3H	OS_LNC1512	Os03t0341300-01	Similar to Cytochrome c oxidoreductase.
Os02t0557500-01	C3H	OS_LNC1512	Os10t0555100-01	Similar to DNA chromosome 4, ESSA I CONTIG fragment NO. 6.
Os02t0557500-01	C3H	OS_LNC1512	Os01t0685500-01	Similar to DNA ligase.
MSTRG.16497.3	SBP	OS_LNC1512	Os01t0685500-01	Similar to DNA ligase.
Os02t0557500-01	C3H	OS_LNC1512	Os01t0525800-01	Similar to DVL5.
Os02t0557500-01	C3H	OS_LNC1512	Os12t0138050-00	Similar to EF hand family protein, expressed.
Os02t0557500-01	C3H	OS_LNC1512	Os01t0837200-01	Similar to esterase/lipase/thioesterase family protein.
Os08t0369600-01	CPP	OS_LNC1512	Os03t0759000-01	Similar to F16A14.19.
MSTRG.16497.3	SBP	OS_LNC1512	Os07t0522600-02	Similar to glutamate-gated kainate-type ion channel receptor subunit GluR5.
Os08t0369600-01	CPP	OS_LNC1512	Os09t0467200-01	Similar to Glutathione S-transferase GST 23.
Os08t0369600-01	CPP	OS_LNC1512	Os01t0369700-03	Similar to Glutathione S-transferase GST 8.
MSTRG.16497.3	SBP	OS_LNC1512	Os09t0563300-02	Similar to GroEL-like chaperone, ATPase.
MSTRG.16497.3	SBP	OS_LNC1512	Os04t0631100-01	Similar to H0105C05.5 protein.
Os02t0557500-01	C3H	OS_LNC1512	Os04t0563801-00	Similar to H0409D10.4 protein.
MSTRG.3867.2	WRKY	OS_LNC1512	Os04t0439300-01	Similar to H0525C06.6 protein.
Os08t0369600-01	CPP	OS_LNC1512	Os03t0101300-01	Similar to Hexose transporter.
MSTRG.9896.1	bZIP	OS_LNC1512	Os01t0115600-01	Similar to LRK14.
MSTRG.3867.2	WRKY	OS_LNC1512	Os06t0108500-01	Similar to MIKC-type MADS-box transcription factor AGL1.
MSTRG.3867.2	WRKY	OS_LNC1512	Os04t0452700-01	Similar to Monosaccharide transporter 1.
MSTRG.16497.3	SBP	OS_LNC1512	Os02t0288400-00	Similar to MRP-like ABC transporter.
Os08t0369600-01	CPP	OS_LNC1512	Os01t0938900-02	Similar to Nascent polypeptide-associated complex alpha subunit-like protein 3.
MSTRG.16497.3	SBP	OS_LNC1512	Os06t0255400-01	Similar to Nudix hydrolase 18, mitochondrial precursor.
MSTRG.3867.2	WRKY	OS_LNC1512	Os04t0303950-01	Similar to OSIGBa0092O07.3 protein.
Os08t0369600-01	CPP	OS_LNC1512	Os04t0430600-01	Similar to OSIGBa0160I14.1 protein.
Os02t0557500-01	C3H	OS_LNC1512	Os01t0966100-01	Similar to Peroxisomal ABC transporter.
MSTRG.9896.1	bZIP	OS_LNC1512	Os12t0105500-01	Similar to Phosphatidate cytidylyltransferase family protein, expressed.
Os08t0369600-01	CPP	OS_LNC1512	Os08t0508500-00	Similar to predicted protein.
MSTRG.16497.3	SBP	OS_LNC1512	Os12t0543600-00	Similar to sarcosine oxidase.
MSTRG.9896.1	bZIP	OS_LNC1512	Os01t0881500-02	Similar to Scarecrow-like 1.
MSTRG.16497.3	SBP	OS_LNC1512	Os01t0631200-01	Similar to siroheme uroporphyrinogen methyltransferase1.
MSTRG.3867.2	WRKY	OS_LNC1512	Os01t0631200-01	Similar to siroheme uroporphyrinogen methyltransferase1.
MSTRG.16497.3	SBP	OS_LNC1512	Os01t0778700-01	Similar to Transmembrane protein 49.
MSTRG.9896.1	bZIP	OS_LNC1512	Os04t0643100-02	Similar to Vacuolar ATP synthase subunit D.
Os08t0369600-01	CPP	OS_LNC1512	Os03t0792500-01	Similar to Zinc finger POZ domain protein.
Os08t0369600-01	CPP	OS_LNC1512	Os09t0247700-01	Similar to Zinc finger, ZZ-type
Os08t0369600-01	CPP	OS_LNC1512	Os09t0370500-00	VQ domain containing protein.
MSTRG.3867.2	WRKY	OS_LNC1512	Os05t0543300-01	WD40 repeat, region domain containing protein.
Os02t0557500-01	C3H	OS_LNC1512	Os09t0363600-01	WD40/YVTN repeat-like domain containing protein.
MSTRG.3867.2	WRKY	OS_LNC1512	Os03t0712200-01	Zinc finger, RanBP2-type domain containing protein.
Os02t0557500-01	C3H	OS_LNC1512	Os03t0377600-01	Zinc finger, RING/FYVE/PHD-type domain containing protein.
MSTRG.3867.2	WRKY	OS_LNC1512	Os07t0618600-01	Zinc finger, RING/FYVE/PHD-type domain containing protein.
Os11t0218000-01	bZIP	OS_LNC1561	Os01t0597600-01	Amino acid transporter, transmembrane domain containing protein.
Os11t0218000-01	bZIP	OS_LNC1561	Os06t0228500-01	Amino acid transporter, transmembrane domain containing protein.
Os11t0218000-01	bZIP	OS_LNC1561	Os06t0633800-01	Amino acid transporter, transmembrane domain containing protein.
Os08t0386200-01	WRKY	OS_LNC1561	Os06t0633800-01	Amino acid transporter, transmembrane domain containing protein.
Os11t0218000-01	bZIP	OS_LNC1561	Os02t0114000-01	Bromodomain domain containing protein.
Os08t0386200-01	WRKY	OS_LNC1561	Os02t0114000-01	Bromodomain domain containing protein.
Os11t0218000-01	bZIP	OS_LNC1561	Os01t0186600-01	Conserved hypothetical protein.
Os08t0386200-01	WRKY	OS_LNC1561	Os01t0910900-01	Conserved hypothetical protein.
Os03t0698800-01	C3H	OS_LNC1561	Os05t0452500-01	Conserved hypothetical protein.
Os11t0218000-01	bZIP	OS_LNC1561	Os05t0573000-01	Conserved hypothetical protein.
Os11t0218000-01	bZIP	OS_LNC1561	Os08t0240200-01	Conserved hypothetical protein.
Os11t0218000-01	bZIP	OS_LNC1561	Os09t0130700-00	Conserved hypothetical protein.
Os11t0218000-01	bZIP	OS_LNC1561	Os08t0270200-01	Exosome-associated family protein.
Os08t0386200-01	WRKY	OS_LNC1561	Os08t0270200-01	Exosome-associated family protein.
Os08t0386200-01	WRKY	OS_LNC1561	Os02t0467700-01	Glycosyl transferase, family 28, C-terminal domain containing protein.
Os11t0218000-01	bZIP	OS_LNC1561	Os01t0647200-01	Hypothetical conserved gene.
Os08t0386200-01	WRKY	OS_LNC1561	Os01t0647200-01	Hypothetical conserved gene.
Os03t0698800-01	C3H	OS_LNC1561	Os02t0147800-02	Hypothetical conserved gene.
Os11t0218000-01	bZIP	OS_LNC1561	Os06t0705400-02	Hypothetical conserved gene.
Os03t0698800-01	C3H	OS_LNC1561	Os10t0345701-01	Hypothetical conserved gene.
Os03t0698800-01	C3H	OS_LNC1561	Os03t0145150-00	Hypothetical gene.
Os11t0218000-01	bZIP	OS_LNC1561	Os10t0580750-00	Hypothetical gene.
Os11t0218000-01	bZIP	OS_LNC1561	Os02t0179950-00	Hypothetical protein.
Os08t0386200-01	WRKY	OS_LNC1561	Os02t0179950-00	Hypothetical protein.
Os08t0386200-01	WRKY	OS_LNC1561	Os02t0749200-01	Hypothetical protein.
Os03t0698800-01	C3H	OS_LNC1561	Os02t0793150-01	Hypothetical protein.
Os03t0698800-01	C3H	OS_LNC1561	Os03t0725200-01	Hypothetical protein.
Os11t0218000-01	bZIP	OS_LNC1561	Os06t0606599-00	Hypothetical protein.
Os03t0698800-01	C3H	OS_LNC1561	Os09t0518700-01	Inositol 1, 3, 4-trisphosphate 56-kinase family protein.
Os03t0698800-01	C3H	OS_LNC1561	Os12t0620400-01	Methyl-CpG DNA binding domain containing protein.
Os08t0386200-01	WRKY	OS_LNC1561	Os10t0135100-00	NB-ARC domain containing protein.
Os08t0386200-01	WRKY	OS_LNC1561	Os10t0180000-01	NpGUT1 homolog.
Os11t0218000-01	bZIP	OS_LNC1561	Os06t0163500-01	Peptidase S8 and S53, subtilisin, kexin, sedolisin domain containing protein.
Os11t0218000-01	bZIP	OS_LNC1561	Os07t0496700-01	Phosphate-induced protein 1 conserved region family protein.
Os08t0386200-01	WRKY	OS_LNC1561	Os09t0415800-01	Phosphofructokinase family protein.
Os11t0218000-01	bZIP	OS_LNC1561	Os05t0467700-01	Protein of unknown function DUF1618 domain containing protein.
Os11t0218000-01	bZIP	OS_LNC1561	Os04t0585700-01	Protein of unknown function DUF581 family protein.
Os03t0698800-01	C3H	OS_LNC1561	Os03t0831300-01	Protein of unknown function DUF789 family protein.
Os08t0386200-01	WRKY	OS_LNC1561	Os01t0974200-01	RicMT.
Os08t0386200-01	WRKY	OS_LNC1561	Os05t0243100-01	Similar to 50S ribosomal protein L13.
Os03t0698800-01	C3H	OS_LNC1561	Os05t0111200-01	Similar to Amino acid selective channel protein.
Os08t0386200-01	WRKY	OS_LNC1561	Os01t0945200-00	Similar to BAT1
Os11t0218000-01	bZIP	OS_LNC1561	Os01t0895600-01	Similar to Calreticulin-3.
Os03t0698800-01	C3H	OS_LNC1561	Os01t0686000-01	Similar to cDNA, clone: J100026I16, full insert sequence.
Os11t0218000-01	bZIP	OS_LNC1561	Os04t0675400-01	Similar to Chaperone protein dnaJ.
Os11t0218000-01	bZIP	OS_LNC1561	Os01t0254100-01	Similar to CTV.2.
Os11t0218000-01	bZIP	OS_LNC1561	Os01t0151500-00	Similar to GGT4
Os08t0386200-01	WRKY	OS_LNC1561	Os01t0151500-00	Similar to GGT4
Os11t0218000-01	bZIP	OS_LNC1561	Os08t0525800-00	Similar to glucan endo-1,3-beta-glucosidase A6.
Os08t0386200-01	WRKY	OS_LNC1561	Os08t0525800-00	Similar to glucan endo-1,3-beta-glucosidase A6.
Os03t0698800-01	C3H	OS_LNC1561	Os07t0412100-01	Similar to Granule-bound starch synthase Ib, chloroplast precursor.
Os08t0386200-01	WRKY	OS_LNC1561	Os04t0578600-01	Similar to H0404F02.15 protein.
Os11t0218000-01	bZIP	OS_LNC1561	Os07t0596600-02	Similar to IBS1
Os08t0386200-01	WRKY	OS_LNC1561	Os07t0596600-02	Similar to IBS1
Os03t0698800-01	C3H	OS_LNC1561	Os01t0938900-02	Similar to Nascent polypeptide-associated complex alpha subunit-like protein 3.
Os03t0698800-01	C3H	OS_LNC1561	Os01t0128800-01	Similar to plant synaptotagmin.
Os11t0218000-01	bZIP	OS_LNC1561	Os03t0299900-01	Similar to Plastid aminotransferase.
Os11t0218000-01	bZIP	OS_LNC1561	Os01t0916200-02	Similar to predicted protein.
Os08t0386200-01	WRKY	OS_LNC1561	Os01t0916200-02	Similar to predicted protein.
Os03t0698800-01	C3H	OS_LNC1561	Os06t0728800-01	Similar to predicted protein.
Os03t0698800-01	C3H	OS_LNC1561	Os11t0691500-00	Similar to Protein kinase domain containing protein.
Os08t0386200-01	WRKY	OS_LNC1561	Os07t0438550-01	Similar to salt-inducible protein kinase.
Os11t0218000-01	bZIP	OS_LNC1561	Os03t0231700-02	Similar to squalene monooxygenase.
Os08t0386200-01	WRKY	OS_LNC1561	Os03t0231700-02	Similar to squalene monooxygenase.
Os11t0218000-01	bZIP	OS_LNC1561	Os04t0551800-01	Similar to T-complex protein 1, alpha subunit.
Os08t0386200-01	WRKY	OS_LNC1561	Os04t0551800-01	Similar to T-complex protein 1, alpha subunit.
Os11t0218000-01	bZIP	OS_LNC1561	Os02t0661100-01	Similar to Trehalose-6-phosphate phosphatase.
Os11t0218000-01	bZIP	OS_LNC1561	Os11t0497000-01	Similar to Ubiquitin activating enzyme-like protein.
Os11t0218000-01	bZIP	OS_LNC1561	Os03t0792500-01	Similar to Zinc finger POZ domain protein.
Os08t0386200-01	WRKY	OS_LNC1561	Os03t0792500-01	Similar to Zinc finger POZ domain protein.
Os03t0698800-01	C3H	OS_LNC1561	Os03t0193700-00	Terpenoid cylases/protein prenyltransferase alpha-alpha toroid domain containing protein.
Os11t0218000-01	bZIP	OS_LNC1561	Os06t0606700-00	Tetratricopeptide-like helical domain containing protein.
Os11t0218000-01	bZIP	OS_LNC1561	Os02t0759400-01	Zinc finger, RING/FYVE/PHD-type domain containing protein.
Os09t0470500-01	HD-ZIP	OS_LNC1573	Os04t0690800-01	22-kDa Photosystem II protein, Photoprotection
Os11t0490900-01	WRKY	OS_LNC1573	Os04t0690800-01	22-kDa Photosystem II protein, Photoprotection
Os09t0106700-01	MYB	OS_LNC1573	Os03t0856000-01	2OG-Fe(II) oxygenase domain containing protein.
Os08t0481400-01	HD-ZIP	OS_LNC1573	Os06t0255100-01	2OG-Fe(II) oxygenase domain containing protein.
Os11t0490900-01	WRKY	OS_LNC1573	Os06t0255100-01	2OG-Fe(II) oxygenase domain containing protein.
MSTRG.1256.2	B3	OS_LNC1573	Os10t0559500-01	2OG-Fe(II) oxygenase domain containing protein.
Os09t0106700-01	MYB	OS_LNC1573	Os02t0177600-01	4-coumarate:coenzyme A ligase, Lignin biosynthesis, Defense against wounding
Os07t0484700-01	MYB_related	OS_LNC1573	Os02t0177600-01	4-coumarate:coenzyme A ligase, Lignin biosynthesis, Defense against wounding
MSTRG.9202.1	HD-ZIP	OS_LNC1573	Os08t0448000-01	4-coumarate:coenzyme A ligase, Lignin biosynthesis, Defense against wounding
MSTRG.1256.2	B3	OS_LNC1573	Os06t0703800-01	Activator of Hsp90 ATPase, N-terminal domain containing protein.
MSTRG.26383.2	WRKY	OS_LNC1573	Os03t0151600-02	Acyl-CoA N-acyltransferase domain containing protein.
Os08t0481400-01	HD-ZIP	OS_LNC1573	Os03t0664800-01	Acyl-CoA N-acyltransferase domain containing protein.
Os01t0218100-01	bHLH	OS_LNC1573	Os12t0236400-01	Adenylate kinase A.
Os01t0797600-01	ERF	OS_LNC1573	Os04t0466600-01	Agmatine deiminase domain containing protein.
MSTRG.9202.1	HD-ZIP	OS_LNC1573	Os04t0466600-01	Agmatine deiminase domain containing protein.
MSTRG.21839.3	NAC	OS_LNC1573	Os04t0466600-01	Agmatine deiminase domain containing protein.
Os07t0484700-01	MYB_related	OS_LNC1573	Os03t0767000-01	Allene oxide synthase, Biosynthesis of jasmonic acid
Os11t0490900-01	WRKY	OS_LNC1573	Os03t0767000-01	Allene oxide synthase, Biosynthesis of jasmonic acid
Os09t0470500-01	HD-ZIP	OS_LNC1573	Os01t0595600-01	Alpha/beta hydrolase fold-1 domain containing protein.
Os11t0490900-01	WRKY	OS_LNC1573	Os06t0214300-01	Alpha/beta hydrolase fold-3 domain containing protein.
Os08t0481400-01	HD-ZIP	OS_LNC1573	Os08t0475400-02	Alpha/beta hydrolase fold-3 domain containing protein.
Os01t0313300-01	ERF	OS_LNC1573	Os06t0633800-01	Amino acid transporter, transmembrane domain containing protein.
Os11t0490900-01	WRKY	OS_LNC1573	Os02t0654700-01	AP2/ERF family protein, Abiotic stress response
Os07t0484700-01	MYB_related	OS_LNC1573	Os11t0579900-01	Armadillo-like helical domain containing protein.
Os09t0106700-01	MYB	OS_LNC1573	Os08t0379200-01	ATPase, P-type, K/Mg/Cd/Cu/Zn/Na/Ca/Na/H-transporter family protein.
Os02t0641300-00	MYB_related	OS_LNC1573	Os03t0742900-01	Aux /IAA protein.
MSTRG.23721.2	WRKY	OS_LNC1573	Os02t0643800-01	Auxin responsive SAUR protein family protein.
MSTRG.26383.2	WRKY	OS_LNC1573	Os03t0792800-01	Beta-1,3-glucanase-like protein.
MSTRG.13502.2	Trihelix	OS_LNC1573	Os01t0133500-01	Beta-lactamase-like domain containing protein.
Os02t0641300-00	MYB_related	OS_LNC1573	Os05t0160300-01	Bifunctional inhibitor/plant lipid transfer protein/seed storage domain containing protein.
MSTRG.26383.2	WRKY	OS_LNC1573	Os07t0198300-01	Bifunctional inhibitor/plant lipid transfer protein/seed storage domain containing protein.
Os01t0797600-01	ERF	OS_LNC1573	Os01t0934100-01	C2 calcium-dependent membrane targeting domain containing protein.
MSTRG.9202.1	HD-ZIP	OS_LNC1573	Os01t0934100-01	C2 calcium-dependent membrane targeting domain containing protein.
MSTRG.23721.2	WRKY	OS_LNC1573	Os03t0688300-01	Calcium-dependent protein kinase, Positive regulator of drought stress tolerance and spikelet fertility
Os08t0481400-01	HD-ZIP	OS_LNC1573	Os12t0556500-01	Calmodulin binding protein-like family protein.
MSTRG.23721.2	WRKY	OS_LNC1573	Os12t0556500-01	Calmodulin binding protein-like family protein.
MSTRG.23721.2	WRKY	OS_LNC1573	Os09t0478100-01	Cellulose synthase family protein.
Os09t0106700-01	MYB	OS_LNC1573	Os03t0807900-01	Chaperonin-like RbcX family protein.
Os01t0218100-01	bHLH	OS_LNC1573	Os02t0187800-01	Cinnamyl-alcohol dehydrogenase, Lignin biosynthesis, Monolignol biosynthesis
MSTRG.9202.1	HD-ZIP	OS_LNC1573	Os11t0661800-01	Concanavalin A-like lectin/glucanase domain containing protein.
Os02t0641300-00	MYB_related	OS_LNC1573	Os01t0186600-01	Conserved hypothetical protein.
Os11t0490900-01	WRKY	OS_LNC1573	Os01t0214500-01	Conserved hypothetical protein.
MSTRG.9202.1	HD-ZIP	OS_LNC1573	Os01t0670500-01	Conserved hypothetical protein.
Os11t0490900-01	WRKY	OS_LNC1573	Os01t0670500-01	Conserved hypothetical protein.
Os01t0797600-01	ERF	OS_LNC1573	Os01t0721100-01	Conserved hypothetical protein.
Os01t0797600-01	ERF	OS_LNC1573	Os01t0794100-01	Conserved hypothetical protein.
Os01t0313300-01	ERF	OS_LNC1573	Os01t0910900-01	Conserved hypothetical protein.
MSTRG.1256.2	B3	OS_LNC1573	Os02t0253700-01	Conserved hypothetical protein.
MSTRG.23721.2	WRKY	OS_LNC1573	Os02t0264300-01	Conserved hypothetical protein.
Os11t0490900-01	WRKY	OS_LNC1573	Os02t0264300-01	Conserved hypothetical protein.
MSTRG.23721.2	WRKY	OS_LNC1573	Os02t0552700-01	Conserved hypothetical protein.
MSTRG.23721.2	WRKY	OS_LNC1573	Os02t0603600-01	Conserved hypothetical protein.
MSTRG.26383.2	WRKY	OS_LNC1573	Os02t0657550-01	Conserved hypothetical protein.
Os11t0490900-01	WRKY	OS_LNC1573	Os02t0690200-01	Conserved hypothetical protein.
Os01t0218100-01	bHLH	OS_LNC1573	Os02t0743200-01	Conserved hypothetical protein.
MSTRG.23721.2	WRKY	OS_LNC1573	Os02t0761500-01	Conserved hypothetical protein.
MSTRG.13502.2	Trihelix	OS_LNC1573	Os03t0102600-01	Conserved hypothetical protein.
Os09t0470500-01	HD-ZIP	OS_LNC1573	Os03t0201000-01	Conserved hypothetical protein.
Os08t0481400-01	HD-ZIP	OS_LNC1573	Os03t0279600-01	Conserved hypothetical protein.
Os07t0484700-01	MYB_related	OS_LNC1573	Os03t0279600-01	Conserved hypothetical protein.
MSTRG.23721.2	WRKY	OS_LNC1573	Os03t0351700-01	Conserved hypothetical protein.
Os02t0641300-00	MYB_related	OS_LNC1573	Os03t0377300-01	Conserved hypothetical protein.
Os11t0490900-01	WRKY	OS_LNC1573	Os03t0683700-02	Conserved hypothetical protein.
Os08t0481400-01	HD-ZIP	OS_LNC1573	Os03t0740833-01	Conserved hypothetical protein.
Os02t0641300-00	MYB_related	OS_LNC1573	Os03t0766600-01	Conserved hypothetical protein.
Os01t0797600-01	ERF	OS_LNC1573	Os04t0330301-00	Conserved hypothetical protein.
MSTRG.1256.2	B3	OS_LNC1573	Os05t0130600-01	Conserved hypothetical protein.
Os01t0797600-01	ERF	OS_LNC1573	Os05t0181300-01	Conserved hypothetical protein.
MSTRG.23721.2	WRKY	OS_LNC1573	Os05t0181300-01	Conserved hypothetical protein.
MSTRG.21839.3	NAC	OS_LNC1573	Os05t0181700-01	Conserved hypothetical protein.
Os08t0481400-01	HD-ZIP	OS_LNC1573	Os05t0273500-01	Conserved hypothetical protein.
Os11t0490900-01	WRKY	OS_LNC1573	Os05t0273500-01	Conserved hypothetical protein.
Os01t0797600-01	ERF	OS_LNC1573	Os05t0516700-01	Conserved hypothetical protein.
Os08t0481400-01	HD-ZIP	OS_LNC1573	Os05t0520600-01	Conserved hypothetical protein.
Os11t0490900-01	WRKY	OS_LNC1573	Os05t0520600-01	Conserved hypothetical protein.
MSTRG.9202.1	HD-ZIP	OS_LNC1573	Os06t0113500-01	Conserved hypothetical protein.
Os09t0470500-01	HD-ZIP	OS_LNC1573	Os06t0113500-01	Conserved hypothetical protein.
Os01t0313300-01	ERF	OS_LNC1573	Os06t0581701-01	Conserved hypothetical protein.
Os11t0490900-01	WRKY	OS_LNC1573	Os06t0586000-01	Conserved hypothetical protein.
Os01t0797600-01	ERF	OS_LNC1573	Os06t0656700-01	Conserved hypothetical protein.
Os09t0470500-01	HD-ZIP	OS_LNC1573	Os06t0711200-01	Conserved hypothetical protein.
MSTRG.1256.2	B3	OS_LNC1573	Os07t0204100-01	Conserved hypothetical protein.
Os08t0481400-01	HD-ZIP	OS_LNC1573	Os07t0416700-00	Conserved hypothetical protein.
Os09t0470500-01	HD-ZIP	OS_LNC1573	Os07t0572500-01	Conserved hypothetical protein.
Os07t0484700-01	MYB_related	OS_LNC1573	Os07t0661400-01	Conserved hypothetical protein.
MSTRG.9202.1	HD-ZIP	OS_LNC1573	Os07t0679400-01	Conserved hypothetical protein.
Os11t0490900-01	WRKY	OS_LNC1573	Os08t0204632-01	Conserved hypothetical protein.
Os09t0470500-01	HD-ZIP	OS_LNC1573	Os08t0420700-01	Conserved hypothetical protein.
Os01t0797600-01	ERF	OS_LNC1573	Os08t0461400-01	Conserved hypothetical protein.
Os02t0641300-00	MYB_related	OS_LNC1573	Os08t0522300-01	Conserved hypothetical protein.
MSTRG.21839.3	NAC	OS_LNC1573	Os08t0524501-00	Conserved hypothetical protein.
Os09t0470500-01	HD-ZIP	OS_LNC1573	Os09t0272600-01	Conserved hypothetical protein.
Os08t0481400-01	HD-ZIP	OS_LNC1573	Os09t0397200-01	Conserved hypothetical protein.
Os02t0641300-00	MYB_related	OS_LNC1573	Os09t0520500-01	Conserved hypothetical protein.
MSTRG.23721.2	WRKY	OS_LNC1573	Os09t0569700-01	Conserved hypothetical protein.
Os02t0641300-00	MYB_related	OS_LNC1573	Os10t0487600-01	Conserved hypothetical protein.
Os08t0481400-01	HD-ZIP	OS_LNC1573	Os11t0661900-01	Conserved hypothetical protein.
Os09t0470500-01	HD-ZIP	OS_LNC1573	Os12t0153200-01	Conserved hypothetical protein.
MSTRG.23721.2	WRKY	OS_LNC1573	Os12t0153200-01	Conserved hypothetical protein.
MSTRG.9202.1	HD-ZIP	OS_LNC1573	Os12t0222300-01	Conserved hypothetical protein.
Os09t0106700-01	MYB	OS_LNC1573	Os12t0222300-01	Conserved hypothetical protein.
Os02t0641300-00	MYB_related	OS_LNC1573	Os12t0222300-01	Conserved hypothetical protein.
MSTRG.13502.2	Trihelix	OS_LNC1573	Os12t0222300-01	Conserved hypothetical protein.
MSTRG.1256.2	B3	OS_LNC1573	Os12t0257500-02	Conserved hypothetical protein.
MSTRG.1256.2	B3	OS_LNC1573	Os03t0638900-01	Cyclin-like F-box domain containing protein.
Os08t0481400-01	HD-ZIP	OS_LNC1573	Os07t0122900-01	Cyclin-like F-box domain containing protein.
Os09t0470500-01	HD-ZIP	OS_LNC1573	Os08t0150700-01	Cyclin-like F-box domain containing protein.
Os07t0484700-01	MYB_related	OS_LNC1573	Os08t0150700-01	Cyclin-like F-box domain containing protein.
Os07t0484700-01	MYB_related	OS_LNC1573	Os09t0547800-01	Cyclin-like F-box domain containing protein.
Os02t0641300-00	MYB_related	OS_LNC1573	Os08t0441400-01	Cytochrome c oxidase, subunit VIb domain containing protein.
Os02t0641300-00	MYB_related	OS_LNC1573	Os02t0186800-00	Cytochrome P450 family protein.
Os02t0641300-00	MYB_related	OS_LNC1573	Os02t0278400-01	Cytochrome P450 family protein.
MSTRG.13502.2	Trihelix	OS_LNC1573	Os05t0424300-01	Cytochrome P450 family protein.
MSTRG.1256.2	B3	OS_LNC1573	Os06t0328900-01	Cytochrome P450 family protein.
MSTRG.23721.2	WRKY	OS_LNC1573	Os06t0328900-01	Cytochrome P450 family protein.
MSTRG.1256.2	B3	OS_LNC1573	Os06t0501900-01	Cytochrome P450 family protein.
Os11t0490900-01	WRKY	OS_LNC1573	Os06t0501900-01	Cytochrome P450 family protein.
MSTRG.13502.2	Trihelix	OS_LNC1573	Os10t0439924-01	Cytochrome P450 family protein.
Os11t0490900-01	WRKY	OS_LNC1573	Os10t0513900-01	Cytochrome P450 family protein.
Os09t0106700-01	MYB	OS_LNC1573	Os08t0114300-01	D-arabinono-1,4-lactone oxidase domain containing protein.
MSTRG.1256.2	B3	OS_LNC1573	Os02t0199200-00	Disease resistance protein domain containing protein.
Os01t0313300-01	ERF	OS_LNC1573	Os02t0199200-00	Disease resistance protein domain containing protein.
Os09t0106700-01	MYB	OS_LNC1573	Os02t0199200-00	Disease resistance protein domain containing protein.
MSTRG.26383.2	WRKY	OS_LNC1573	Os02t0199200-00	Disease resistance protein domain containing protein.
Os07t0484700-01	MYB_related	OS_LNC1573	Os09t0272900-01	Disease resistance protein domain containing protein.
MSTRG.26383.2	WRKY	OS_LNC1573	Os10t0394400-01	Disease resistance protein domain containing protein.
MSTRG.26383.2	WRKY	OS_LNC1573	Os03t0108000-01	Dual-specificity tyrosine-phosphatase CDC25, Arsenic metabolism
MSTRG.21839.3	NAC	OS_LNC1573	Os02t0580400-01	Dynein light chain, type 1 family protein.
Os11t0490900-01	WRKY	OS_LNC1573	Os02t0580400-01	Dynein light chain, type 1 family protein.
Os01t0797600-01	ERF	OS_LNC1573	Os01t0135700-01	EF-HAND 2 domain containing protein.
MSTRG.9202.1	HD-ZIP	OS_LNC1573	Os01t0135700-01	EF-HAND 2 domain containing protein.
MSTRG.26383.2	WRKY	OS_LNC1573	Os01t0135700-01	EF-HAND 2 domain containing protein.
Os01t0218100-01	bHLH	OS_LNC1573	Os12t0157200-01	EF-Hand type domain containing protein.
Os11t0490900-01	WRKY	OS_LNC1573	Os07t0535700-01	F-box associated type 1 domain containing protein.
Os11t0490900-01	WRKY	OS_LNC1573	Os08t0461700-01	F-box domain, cyclin-like domain containing protein.
Os11t0490900-01	WRKY	OS_LNC1573	Os01t0692100-01	Glutathione S-transferase, C-terminal-like domain containing protein.
MSTRG.9202.1	HD-ZIP	OS_LNC1573	Os01t0897600-01	Glycoside hydrolase, family 1 protein.
Os09t0470500-01	HD-ZIP	OS_LNC1573	Os02t0139300-01	Glycoside hydrolase, family 17 protein.
MSTRG.9202.1	HD-ZIP	OS_LNC1573	Os08t0522500-01	Glycoside hydrolase, family 19 protein.
MSTRG.13502.2	Trihelix	OS_LNC1573	Os07t0634400-01	HAD-superfamily hydrolase, subfamily IA, variant 3 domain containing protein.
MSTRG.26383.2	WRKY	OS_LNC1573	Os01t0736000-01	HMG-I and HMG-Y, DNA-binding domain containing protein.
Os11t0490900-01	WRKY	OS_LNC1573	Os03t0124000-01	Homeodomain-related domain containing protein.
MSTRG.23721.2	WRKY	OS_LNC1573	Os01t0150700-00	Hypothetical conserved gene.
Os08t0481400-01	HD-ZIP	OS_LNC1573	Os01t0834900-01	Hypothetical conserved gene.
Os01t0313300-01	ERF	OS_LNC1573	Os02t0156600-00	Hypothetical conserved gene.
Os07t0484700-01	MYB_related	OS_LNC1573	Os02t0156600-00	Hypothetical conserved gene.
Os01t0797600-01	ERF	OS_LNC1573	Os02t0209000-01	Hypothetical conserved gene.
Os01t0797600-01	ERF	OS_LNC1573	Os03t0431600-00	Hypothetical conserved gene.
Os09t0106700-01	MYB	OS_LNC1573	Os04t0614300-01	Hypothetical conserved gene.
MSTRG.26383.2	WRKY	OS_LNC1573	Os04t0684100-02	Hypothetical conserved gene.
MSTRG.26383.2	WRKY	OS_LNC1573	Os05t0142500-00	Hypothetical conserved gene.
Os01t0313300-01	ERF	OS_LNC1573	Os05t0360800-00	Hypothetical conserved gene.
MSTRG.9202.1	HD-ZIP	OS_LNC1573	Os05t0360800-00	Hypothetical conserved gene.
Os09t0470500-01	HD-ZIP	OS_LNC1573	Os05t0464200-00	Hypothetical conserved gene.
MSTRG.9202.1	HD-ZIP	OS_LNC1573	Os06t0133300-00	Hypothetical conserved gene.
MSTRG.9202.1	HD-ZIP	OS_LNC1573	Os06t0499100-00	Hypothetical conserved gene.
Os09t0470500-01	HD-ZIP	OS_LNC1573	Os06t0706500-00	Hypothetical conserved gene.
MSTRG.9202.1	HD-ZIP	OS_LNC1573	Os06t0706500-00	Hypothetical conserved gene.
Os11t0490900-01	WRKY	OS_LNC1573	Os06t0710001-00	Hypothetical conserved gene.
MSTRG.9202.1	HD-ZIP	OS_LNC1573	Os07t0121401-01	Hypothetical conserved gene.
MSTRG.1256.2	B3	OS_LNC1573	Os09t0416500-01	Hypothetical conserved gene.
Os11t0490900-01	WRKY	OS_LNC1573	Os10t0563800-00	Hypothetical conserved gene.
MSTRG.23721.2	WRKY	OS_LNC1573	Os11t0278300-00	Hypothetical conserved gene.
MSTRG.9202.1	HD-ZIP	OS_LNC1573	Os11t0600600-01	Hypothetical conserved gene.
MSTRG.23721.2	WRKY	OS_LNC1573	Os11t0600600-01	Hypothetical conserved gene.
Os11t0490900-01	WRKY	OS_LNC1573	Os11t0600600-01	Hypothetical conserved gene.
Os02t0641300-00	MYB_related	OS_LNC1573	Os11t0707100-00	Hypothetical conserved gene.
Os08t0481400-01	HD-ZIP	OS_LNC1573	Os02t0555832-01	Hypothetical gene.
MSTRG.23721.2	WRKY	OS_LNC1573	Os02t0727200-00	Hypothetical gene.
MSTRG.13502.2	Trihelix	OS_LNC1573	Os03t0197175-00	Hypothetical gene.
Os08t0481400-01	HD-ZIP	OS_LNC1573	Os03t0325400-01	Hypothetical gene.
Os01t0797600-01	ERF	OS_LNC1573	Os04t0679967-01	Hypothetical gene.
MSTRG.21839.3	NAC	OS_LNC1573	Os05t0592350-00	Hypothetical gene.
Os09t0470500-01	HD-ZIP	OS_LNC1573	Os09t0397800-01	Hypothetical gene.
MSTRG.26383.2	WRKY	OS_LNC1573	Os09t0397800-01	Hypothetical gene.
MSTRG.26383.2	WRKY	OS_LNC1573	Os09t0553250-00	Hypothetical gene.
Os02t0641300-00	MYB_related	OS_LNC1573	Os11t0701700-01	Hypothetical gene.
MSTRG.26383.2	WRKY	OS_LNC1573	Os06t0707250-00	Hypothetical genes.
Os09t0470500-01	HD-ZIP	OS_LNC1573	Os01t0184050-00	Hypothetical protein.
MSTRG.1256.2	B3	OS_LNC1573	Os01t0953000-01	Hypothetical protein.
MSTRG.26383.2	WRKY	OS_LNC1573	Os01t0953000-01	Hypothetical protein.
MSTRG.21839.3	NAC	OS_LNC1573	Os02t0179950-00	Hypothetical protein.
Os01t0313300-01	ERF	OS_LNC1573	Os02t0749200-01	Hypothetical protein.
Os02t0641300-00	MYB_related	OS_LNC1573	Os04t0432200-00	Hypothetical protein.
Os01t0313300-01	ERF	OS_LNC1573	Os04t0451000-02	Hypothetical protein.
Os01t0218100-01	bHLH	OS_LNC1573	Os05t0382400-01	Hypothetical protein.
Os07t0484700-01	MYB_related	OS_LNC1573	Os07t0669675-00	Hypothetical protein.
Os02t0641300-00	MYB_related	OS_LNC1573	Os09t0332600-01	Hypothetical protein.
MSTRG.26383.2	WRKY	OS_LNC1573	Os09t0482650-00	Hypothetical protein.
Os09t0470500-01	HD-ZIP	OS_LNC1573	Os10t0450800-02	Hypothetical protein.
Os01t0218100-01	bHLH	OS_LNC1573	Os12t0232700-01	Hypothetical protein.
MSTRG.21839.3	NAC	OS_LNC1573	Os12t0277650-00	Hypothetical protein.
Os01t0218100-01	bHLH	OS_LNC1573	Os12t0478200-02	Hypothetical protein.
Os11t0490900-01	WRKY	OS_LNC1573	Os02t0606800-01	Isochorismatase hydrolase family protein.
Os09t0470500-01	HD-ZIP	OS_LNC1573	Os01t0188100-01	Isopenicillin N synthase family protein.
Os01t0218100-01	bHLH	OS_LNC1573	Os01t0314800-01	Late embryogenesis abundant protein 3 family protein.
Os09t0106700-01	MYB	OS_LNC1573	Os04t0371600-01	Leucine-rich repeat, cysteine-containing containing protein.
MSTRG.26383.2	WRKY	OS_LNC1573	Os04t0370600-01	Leucine-rich repeat, cysteine-containing subtype domain containing protein.
Os08t0481400-01	HD-ZIP	OS_LNC1573	Os01t0163000-01	Leucine-rich repeat, N-terminal domain containing protein.
MSTRG.9202.1	HD-ZIP	OS_LNC1573	Os05t0501600-01	Leucine-rich repeat, typical subtype containing protein.
MSTRG.1256.2	B3	OS_LNC1573	Os01t0305200-01	Lg106-like family protein.
MSTRG.23721.2	WRKY	OS_LNC1573	Os01t0225000-00	Mitochondrial carrier protein domain containing protein.
Os09t0470500-01	HD-ZIP	OS_LNC1573	Os08t0439900-01	Mitochondrial glycoprotein family protein.
MSTRG.26383.2	WRKY	OS_LNC1573	Os08t0439900-01	Mitochondrial glycoprotein family protein.
Os01t0797600-01	ERF	OS_LNC1573	Os08t0180000-02	mRNA capping enzyme, large subunit family protein.
Os09t0106700-01	MYB	OS_LNC1573	Os03t0327800-01	NAC Family transcriptional activator, Abiotic stress response, Positive regulator of leaf senescence
MSTRG.26383.2	WRKY	OS_LNC1573	Os03t0327800-01	NAC Family transcriptional activator, Abiotic stress response, Positive regulator of leaf senescence
MSTRG.23721.2	WRKY	OS_LNC1573	Os03t0327800-01	NAC Family transcriptional activator, Abiotic stress response, Positive regulator of leaf senescence
Os08t0481400-01	HD-ZIP	OS_LNC1573	Os04t0107200-01	NAD(P)-binding domain containing protein.
Os11t0490900-01	WRKY	OS_LNC1573	Os03t0324600-01	NB-ARC domain containing protein.
Os09t0106700-01	MYB	OS_LNC1573	Os04t0112100-01	NB-ARC domain containing protein.
MSTRG.23721.2	WRKY	OS_LNC1573	Os04t0112100-01	NB-ARC domain containing protein.
Os08t0481400-01	HD-ZIP	OS_LNC1573	Os08t0387700-01	NB-ARC domain containing protein.
Os01t0218100-01	bHLH	OS_LNC1573	Os11t0207400-01	NB-ARC domain containing protein.
Os09t0470500-01	HD-ZIP	OS_LNC1573	Os12t0565100-01	NB-ARC domain containing protein.
Os02t0641300-00	MYB_related	OS_LNC1573	Os12t0565100-01	NB-ARC domain containing protein.
[truncated: 485 more rows]
