# Supplementary material for: Transcriptional Landscape of Pathogen-responsive Lncrnas Reveals OS_LNC1812-Induced Disease Resistance by Abscisic Acid Pathway in Rice
Source: Research Square preprint supplement (doi:10.21203/rs.3.rs-244393/v1), 2021-03-01
Supplement: Supplementary file 13 [file 15f6b327eb9de6684707e190.xlsx]

## Sheet: RBSDV
LncRNA_name	log2FC	pvalue	FDR	Regulations	CK1	CK2	CK3	RBSDV1	RBSDV2	RBSDV3
OS_LNC0006	4.31904	0.000646757	0.00907329	up	9	2	2	15	178	94
OS_LNC0022	1.1962	0.0305404	0.172499	up	78	84	47	138	267	129
OS_LNC0036	1.32967	0.0042768	0.0402191	up	76	166	165	411	484	243
OS_LNC0040	-1.87132	3.4e-07	1.46e-05	down	1439	1126	939	538	302	285
OS_LNC0043	2.64343	0.001269	0.0154838	up	12	27	4	67	114	111
OS_LNC0048	1.22309	0.0225078	0.138347	up	75	105	212	407	223	392
OS_LNC0059	-3.08863	0.00392176	0.037545	down	147	73	208	7	43	5
OS_LNC0062	1.97234	2.04e-05	0.000513076	up	28	16	18	86	111	79
OS_LNC0066	-1.05194	5.62e-05	0.0012094	down	131	125	113	67	66	68
OS_LNC0080	-1.67219	1.21e-05	0.000327833	down	542	612	679	229	136	279
OS_LNC0086	1.00827	0.0158924	0.107598	up	1833	2225	3382	5600	7306	3794
OS_LNC0090	-1.17453	0.000836471	0.0111091	down	339	328	489	202	142	230
OS_LNC0105	1.51901	0.0147979	0.102109	up	89	83	39	181	344	155
OS_LNC0109	2.5753	0.0469383	0.235025	up	7	1	7	68	39	3
OS_LNC0116	1.19197	0.0121014	0.087893	up	50	23	51	148	95	87
OS_LNC0128	1.31477	0.00108047	0.0135768	up	47	65	59	126	140	201
OS_LNC0131	-1.59621	0.00171598	0.0196288	down	340	214	415	85	151	119
OS_LNC0132	1.57992	0.0457591	0.230759	up	24	87	123	148	381	213
OS_LNC0134	-1.41468	0.0495864	0.243635	down	577	1474	1422	1007	199	333
OS_LNC0136	-2.15935	0.000442268	0.00665118	down	234	224	75	45	49	42
OS_LNC0145	-1.94138	0.00286864	0.0294399	down	473	1046	461	215	282	82
OS_LNC0155	-1.02886	0.0317342	0.17738	down	244	242	291	267	99	87
OS_LNC0159	-1.27745	0.00385065	0.0370517	down	75	57	48	30	35	20
OS_LNC0165	3.17521	0.0242155	0.146048	up	234	118	60	72	572	3336
OS_LNC0166	-1.66353	0.028002	0.162273	down	85	123	146	96	15	24
OS_LNC0171	1.01006	0.00502549	0.0455317	up	781	1323	1695	3087	2332	3073
OS_LNC0173	1.60179	0.000458589	0.0068607	up	241	494	513	1107	1765	1249
OS_LNC0174	1.75213	0.00635171	0.0544257	up	60	34	18	130	128	173
OS_LNC0176	-3.04472	6.92e-09	4.33e-07	down	464	883	773	176	74	51
OS_LNC0177	1.35048	0.0295613	0.168486	up	93	136	183	334	636	190
OS_LNC0195	-1.8503	1.74e-06	6.14e-05	down	261	387	308	166	77	66
OS_LNC0202	4.23632	0.000112686	0.00215999	up	6	8	2	84	25	221
OS_LNC0210	-3.2727	0.0360468	0.194437	down	5	32	544	14	17	32
OS_LNC0211	1.77583	0.0233615	0.142018	up	371	193	221	349	1390	1202
OS_LNC0215	-1.94083	0.0361538	0.194865	down	106	75	78	67	7	11
OS_LNC0216	-1.25068	0.000508423	0.00746936	down	552	434	447	298	150	247
OS_LNC0218	1.52125	0.000316274	0.00505953	up	17	26	22	60	60	86
OS_LNC0221	-1.56186	0.0420564	0.217387	down	84	46	46	28	7	34
OS_LNC0246	-1.33902	0.00302922	0.0307335	down	663	461	377	229	171	276
OS_LNC0249	1.04124	2.23e-06	7.65e-05	up	234	214	228	616	563	409
OS_LNC0254	-1.64159	0.00095805	0.0123712	down	83	112	112	23	33	51
OS_LNC0255	-1.24672	0.0165133	0.110652	down	68	87	64	23	28	50
OS_LNC0260	-2.47873	1.46e-05	0.000384268	down	92	80	47	23	8	15
OS_LNC0267	2.10386	0.0103807	0.0785673	up	31	56	113	574	96	325
OS_LNC0272	2.17989	0.00938235	0.0727627	up	19	61	37	78	344	138
OS_LNC0280	1.002	0.00204778	0.0226362	up	471	850	875	1571	1805	1479
OS_LNC0283	-1.65615	0.00443999	0.0413626	down	19	53	31	18	8	11
OS_LNC0289	2.48006	5.24e-06	0.000160577	up	44	89	165	722	623	505
OS_LNC0291	-1.02845	0.00023759	0.00398751	down	386	363	396	189	203	235
OS_LNC0299	1.85484	0.0402159	0.210412	up	38	32	37	128	280	29
OS_LNC0300	2.92442	1.28e-05	0.000342379	up	9	12	39	189	183	135
OS_LNC0309	-2.44419	3.16e-05	0.000741739	down	34	23	32	10	3	6
OS_LNC0321	1.06917	0.0480728	0.238626	up	580	863	298	1197	1638	1232
OS_LNC0322	1.42779	0.000587159	0.00840789	up	84	175	116	554	362	240
OS_LNC0324	1.55525	1.05e-15	2.26e-13	up	378	470	437	1405	1537	1283
OS_LNC0332	1.06877	0.0202367	0.128276	up	11	15	14	33	22	39
OS_LNC0333	2.27709	0.02795	0.16202	up	76	209	286	1393	127	1561
OS_LNC0334	2.48952	0.00230939	0.0249126	up	77	43	28	120	418	378
OS_LNC0342	-3.6119	0.00012193	0.00231085	down	104	695	142	42	13	31
OS_LNC0343	-1.36315	0.0360086	0.194298	down	52	62	27	28	9	26
OS_LNC0344	-1.04041	0.0392126	0.206474	down	100	163	120	73	37	97
OS_LNC0345	1.88203	5.06e-08	2.61e-06	up	80	100	90	543	380	228
OS_LNC0347	1.33039	0.00147926	0.0174591	up	46	35	69	139	119	164
OS_LNC0350	-4.19134	0.00055759	0.00804388	down	11	94	353	9	7	11
OS_LNC0351	1.7545	0.0454692	0.229687	up	15	37	67	129	259	51
OS_LNC0358	2.15959	0.00646609	0.0551377	up	80	79	14	257	335	283
OS_LNC0366	1.05723	0.0119148	0.0869205	up	109	171	136	229	397	319
OS_LNC0371	-3.82856	0.00507135	0.0458455	down	44	29	2	1	3	2
OS_LNC0376	3.72377	5.09e-12	5.91e-10	up	26	92	43	790	725	817
OS_LNC0377	-1.02331	0.0313873	0.175885	down	48	38	38	16	26	26
OS_LNC0396	1.8493	0.00216181	0.023604	up	161	116	154	374	952	395
OS_LNC0398	1.54333	0.0106821	0.0802377	up	52	91	52	119	313	183
OS_LNC0399	-1.19247	0.0172876	0.114417	down	10328	5682	7095	4457	2376	4808
OS_LNC0409	-2.33903	0.0176256	0.116099	down	168	31	26	23	15	16
OS_LNC0412	1.74628	2.36e-06	8.05e-05	up	105	95	177	609	359	472
OS_LNC0421	-1.69906	0.00216963	0.0236627	down	337	247	186	68	70	127
OS_LNC0429	1.19357	0.0133272	0.0942458	up	54	160	151	327	331	262
OS_LNC0431	-1.13181	0.00104389	0.013235	down	104	78	78	47	40	48
OS_LNC0438	-1.92227	0.000165653	0.00297535	down	154	102	120	56	19	41
OS_LNC0440	3.14539	5.2e-05	0.00113109	up	32	11	12	149	296	114
OS_LNC0446	1.77371	0.0107946	0.0808706	up	50	37	101	125	246	321
OS_LNC0452	-1.70851	1.24e-05	0.000335775	down	616	710	695	212	162	312
OS_LNC0457	-1.37355	0.0280465	0.162458	down	263	140	145	155	52	51
OS_LNC0458	1.20868	0.0272963	0.159267	up	26	20	38	57	56	101
OS_LNC0462	-1.1845	0.0230524	0.140696	down	1459	631	1055	780	363	494
OS_LNC0464	-1.42307	0.0114382	0.0842681	down	92	39	59	41	22	21
OS_LNC0469	4.10096	0.00445639	0.0414904	up	15	11	6	15	540	40
OS_LNC0475	1.33951	0.025063	0.149716	up	110	142	295	868	470	271
OS_LNC0481	1.88882	2.22e-12	2.74e-10	up	103	79	92	414	414	326
OS_LNC0489	1.55515	8.83e-22	4.33e-19	up	97	121	122	474	334	329
OS_LNC0493	-2.27336	2.78e-05	0.000664618	down	234	462	738	147	71	115
OS_LNC0494	1.7893	0.000137272	0.00254693	up	119	119	133	387	712	327
OS_LNC0496	-1.13832	0.000176259	0.00313312	down	739	600	555	428	249	318
OS_LNC0500	1.39163	0.0466706	0.234123	up	167	238	363	1217	897	228
OS_LNC0502	-1.54152	0.0024606	0.0261665	down	329	260	157	143	62	96
OS_LNC0510	2.10485	0.00719216	0.0597843	up	11	26	19	201	39	49
OS_LNC0515	3.1347	0.000585614	0.00839054	up	3	21	3	106	95	62
OS_LNC0533	2.32426	0.0459648	0.231445	up	73	74	834	1965	865	2526
OS_LNC0544	2.48394	0.00281425	0.0290084	up	35	51	80	294	634	98
OS_LNC0548	3.02561	7.01e-07	2.77e-05	up	33	17	26	210	356	137
OS_LNC0574	1.15117	0.000955454	0.0123418	up	93	68	70	221	149	216
OS_LNC0578	1.84894	0.00270961	0.0281613	up	107	64	67	632	246	167
OS_LNC0583	1.48654	4.62e-06	0.000144086	up	19	18	27	71	68	63
OS_LNC0596	-1.96708	7.6e-06	0.000220398	down	1025	625	595	306	216	154
OS_LNC0597	-2.58163	0.049375	0.242984	down	361	309	269	110	1	76
OS_LNC0602	-2.10553	0.00389226	0.0373533	down	50	16	25	11	8	6
OS_LNC0606	1.83171	0.0409232	0.21315	up	14	34	25	44	193	41
OS_LNC0607	-1.15849	2.32e-05	0.000571289	down	123	211	162	86	82	80
OS_LNC0611	-1.27272	0.00271705	0.0282226	down	19	33	32	14	14	11
OS_LNC0612	1.25335	0.0010132	0.0129495	up	33	29	22	72	87	67
OS_LNC0615	-1.41746	5.59e-06	0.000169677	down	294	294	273	187	104	85
OS_LNC0616	-1.68988	0.0186815	0.120918	down	207	154	103	89	66	17
OS_LNC0624	-1.27418	0.00484603	0.0442158	down	1191	776	906	575	268	530
OS_LNC0628	-1.0053	0.00306174	0.0310032	down	357	292	248	223	125	169
OS_LNC0629	-1.94167	0.00237495	0.0254523	down	80	47	35	18	22	9
OS_LNC0636	1.17767	0.00339092	0.033608	up	61	49	82	162	206	121
OS_LNC0652	-1.1617	0.00403642	0.0383962	down	1168	911	883	382	570	525
OS_LNC0654	2.51149	0.00317832	0.031888	up	8	8	7	108	38	14
OS_LNC0682	2.21009	0.026113	0.15416	up	21	4	4	88	24	53
OS_LNC0687	2.1216	0.00283022	0.0291343	up	6	16	32	66	87	100
OS_LNC0688	-1.1586	0.0207138	0.130289	down	151	98	151	72	40	91
OS_LNC0691	-1.22605	0.00206557	0.0227842	down	157	116	110	92	58	42
OS_LNC0692	-2.91609	3.88e-08	2.06e-06	down	789	786	408	74	91	127
OS_LNC0711	1.03509	4.44e-05	0.000989412	up	148	229	260	515	470	470
OS_LNC0713	1.37504	0.00198185	0.0220584	up	22	35	33	63	94	98
OS_LNC0714	-1.30646	2.97e-05	0.00070386	down	139	151	100	77	52	52
OS_LNC0720	-5.7239	0.00118549	0.0146443	down	8319	11113	65	30	353	18
OS_LNC0729	-1.4342	4.14e-07	1.74e-05	down	99	155	154	74	44	53
OS_LNC0733	-1.34441	0.000319368	0.00509222	down	523	521	494	284	136	271
OS_LNC0741	2.01447	0.00472912	0.043389	up	16	40	13	68	82	150
OS_LNC0759	-2.08875	0.000420603	0.00637788	down	50	30	68	18	7	15
OS_LNC0776	-1.61369	0.00611795	0.0528853	down	44	171	151	51	42	39
OS_LNC0779	1.12278	0.0404871	0.211458	up	40	38	46	60	93	141
OS_LNC0788	-1.42811	0.00866104	0.0685976	down	401	243	279	166	66	165
OS_LNC0790	1.80611	3.05e-05	0.000719736	up	11	21	10	55	54	55
OS_LNC0800	4.11145	0.000223363	0.00379389	up	13	10	4	144	361	27
OS_LNC0809	2.53552	1.06e-06	4.01e-05	up	101	74	89	383	506	797
OS_LNC0810	-1.0834	0.000140614	0.0025996	down	149	148	133	111	67	57
OS_LNC0814	1.15727	0.0231657	0.141177	up	60	90	90	376	132	124
OS_LNC0819	1.55777	0.0369144	0.198072	up	48	15	34	149	47	139
OS_LNC0823	-1.81596	0.00198226	0.0220597	down	94	78	42	37	22	13
OS_LNC0827	-1.30691	8.93e-05	0.00177939	down	346	288	492	229	134	159
OS_LNC0850	1.29204	9.24e-05	0.00183409	up	30	29	31	118	61	75
OS_LNC0865	1.12657	0.00599824	0.0521167	up	12	18	25	63	37	37
OS_LNC0867	-2.39112	0.00170404	0.0195295	down	885	378	211	101	81	143
OS_LNC0870	1.46043	0.0489865	0.241676	up	16	14	29	28	53	93
OS_LNC0871	1.11651	0.00207027	0.0228295	up	90	69	52	190	159	174
OS_LNC0874	1.12979	0.00971889	0.0746704	up	38	37	83	154	117	119
OS_LNC0891	1.65971	0.000566611	0.00815279	up	115	104	126	663	423	197
OS_LNC0892	1.71147	1.15e-11	1.25e-09	up	80	104	97	495	288	276
OS_LNC0894	-1.25542	2.86e-06	9.51e-05	down	207	208	184	135	74	81
OS_LNC0902	-1.64699	0.0110678	0.0823633	down	101	157	357	95	41	84
OS_LNC0904	1.33911	0.00760141	0.0622455	up	24	17	26	105	38	56
OS_LNC0905	1.5682	0.0303675	0.171791	up	98	158	95	138	438	529
OS_LNC0912	-1.96875	5.91e-11	5.61e-09	down	1629	1443	1422	614	305	413
OS_LNC0913	-2.6673	0.000224529	0.00380786	down	118	98	40	9	20	16
OS_LNC0914	1.19857	0.00666703	0.0564328	up	51	41	34	125	138	69
OS_LNC0922	-4.37918	0.003548	0.0348222	down	2	189	26	3	4	4
OS_LNC0924	1.20048	0.0185991	0.120589	up	48	39	41	199	63	88
OS_LNC0925	-1.21812	0.0223456	0.137574	down	259	201	118	154	79	63
OS_LNC0928	-1.15411	1.51e-08	8.79e-07	down	3053	3195	3367	2265	1289	1426
OS_LNC0930	-1.69913	1.54e-06	5.53e-05	down	1642	2209	2223	543	674	832
OS_LNC0939	-1.5309	0.00740728	0.0611084	down	5301	3761	3839	1660	866	2513
OS_LNC0941	1.68288	0.000343778	0.00540464	up	16	26	35	82	119	72
OS_LNC0945	1.42825	0.0294636	0.16807	up	8	21	37	55	79	59
OS_LNC0949	-1.3289	0.0438107	0.223565	down	274	235	344	277	77	59
OS_LNC0963	-4.52351	1.47e-10	1.28e-08	down	108	57	80	2	5	5
OS_LNC0967	-1.96476	7.31e-05	0.00150595	down	468	896	1066	251	140	297
OS_LNC0969	-2.39365	2.55e-13	3.76e-11	down	254	325	277	61	79	43
OS_LNC0970	-1.62232	0.00440223	0.0411442	down	99	93	48	30	41	18
OS_LNC0971	1.86388	0.000371683	0.00578368	up	46	40	32	102	173	198
OS_LNC0973	-1.74129	0.00398418	0.0380019	down	1163	543	1128	262	221	465
OS_LNC0976	-1.04914	0.00775364	0.0631131	down	439	520	337	190	291	215
OS_LNC0977	-1.19393	7.39e-09	4.61e-07	down	4020	3655	3504	2241	1541	1811
OS_LNC0983	1.38916	0.0227273	0.139392	up	100	108	112	498	378	107
OS_LNC0991	-3.12881	0.00048233	0.00714967	down	170	61	50	21	4	14
OS_LNC0993	-2.23021	0.000787009	0.0106003	down	50	46	104	29	14	7
OS_LNC1002	3.1217	0.023991	0.144908	up	36	29	15	11	618	120
OS_LNC1032	-1.60194	0.0428119	0.220046	down	20	72	20	10	19	11
OS_LNC1046	3.047	0.0152562	0.104366	up	65	31	21	51	131	857
OS_LNC1061	1.12086	0.0286842	0.164749	up	35	49	28	162	59	66
OS_LNC1070	-1.32237	0.000600128	0.00856197	down	1327	921	841	598	345	489
OS_LNC1088	-1.28499	6.08e-05	0.00129214	down	631	518	459	295	191	270
OS_LNC1097	1.27723	0.000589646	0.00843726	up	21	13	18	56	46	42
OS_LNC1101	1.47599	0.00214723	0.0234746	up	63	55	61	160	275	123
OS_LNC1107	-1.05485	0.00927263	0.0721474	down	256	278	210	220	120	81
OS_LNC1108	-1.2603	3.17e-06	0.000103654	down	131	159	183	82	57	83
OS_LNC1112	-1.84923	0.0031729	0.0318419	down	34	68	37	27	7	11
OS_LNC1113	2.37233	2.98e-06	9.87e-05	up	6	7	8	43	30	49
OS_LNC1121	-1.06483	0.018412	0.119673	down	156	371	245	150	169	92
OS_LNC1125	-1.28954	0.00231093	0.0249165	down	234	162	166	127	89	54
OS_LNC1128	-1.04073	0.00161932	0.0187302	down	194	158	182	110	71	114
OS_LNC1139	1.88656	7.81e-12	8.84e-10	up	32	28	26	129	115	116
OS_LNC1144	1.03898	1.32e-05	0.000353936	up	48	46	48	120	99	111
OS_LNC1162	-2.29945	2.46e-05	0.00059934	down	783	678	676	170	79	240
OS_LNC1172	-3.01594	2.03e-07	9.13e-06	down	80	62	45	6	9	11
OS_LNC1173	1.24936	3.26e-06	0.000106325	up	103	95	115	309	321	214
OS_LNC1182	-1.8901	6.12e-10	4.78e-08	down	454	413	326	119	126	119
OS_LNC1183	-3.33381	5.73e-05	0.00123016	down	1316	317	1033	206	72	49
OS_LNC1193	1.35795	0.0034625	0.0341788	up	30	59	26	108	93	126
OS_LNC1202	-1.16429	0.00505245	0.0457127	down	295	279	534	207	137	211
OS_LNC1204	-1.57858	0.00235983	0.0253275	down	138	154	84	82	39	28
OS_LNC1206	-1.50327	0.00894131	0.0702434	down	176	290	327	84	60	160
OS_LNC1209	-1.54991	1.65e-06	5.84e-05	down	705	796	532	295	199	293
OS_LNC1220	-1.07155	0.000231717	0.00390754	down	438	457	551	382	238	177
OS_LNC1224	-1.51303	0.0146925	0.10154	down	981	536	325	210	248	279
OS_LNC1225	-1.80079	0.0145397	0.100726	down	101	118	106	14	63	24
OS_LNC1233	1.43541	2.93e-09	1.96e-07	up	76	60	79	262	217	185
OS_LNC1238	3.12526	1.36e-05	0.000362444	up	52	52	11	359	385	394
OS_LNC1239	4.46767	1.05e-08	6.33e-07	up	86	45	26	776	2110	1029
OS_LNC1243	-1.86328	0.000693236	0.0095792	down	49	113	121	32	17	37
OS_LNC1248	1.3698	6.01e-05	0.00127972	up	70	144	92	295	306	276
OS_LNC1253	3.20679	3.05e-06	0.000100515	up	84	83	292	1256	1568	1784
OS_LNC1254	2.80521	0.00657258	0.0558799	up	3	58	62	290	266	363
OS_LNC1255	-1.15724	2.2e-06	7.56e-05	down	646	744	673	490	254	321
OS_LNC1261	-1.02046	2.7e-05	0.000647749	down	523	682	457	396	266	274
OS_LNC1281	1.54973	0.0105108	0.0792811	up	58	71	40	369	126	100
OS_LNC1293	2.56317	1.14e-09	8.28e-08	up	21	14	19	111	106	141
OS_LNC1305	4.18673	0.0027642	0.0286218	up	10	2	27	42	622	91
OS_LNC1316	-1.55047	8.82e-05	0.00176092	down	51	41	47	19	22	13
OS_LNC1327	-1.20221	0.0208768	0.131059	down	382	504	434	179	126	325
OS_LNC1329	1.30609	0.0110692	0.0823633	up	75	75	104	178	167	343
OS_LNC1339	1.63827	0.00137722	0.0165061	up	17	21	8	56	63	43
OS_LNC1340	-1.60686	0.00780518	0.0634037	down	32	28	19	7	8	14
OS_LNC1361	-2.58751	0.000441413	0.00664163	down	205	411	1017	71	103	117
OS_LNC1362	-3.25168	0.00301554	0.0306353	down	43	618	198	13	43	37
OS_LNC1371	1.2685	0.000578008	0.0082937	up	21	25	25	55	64	71
OS_LNC1376	2.79774	0.000464263	0.00693222	up	168	147	137	879	2272	368
OS_LNC1377	1.64986	0.0112041	0.083056	up	20	26	32	87	40	143
OS_LNC1380	1.48925	0.00307204	0.031075	up	24	24	11	56	61	69
OS_LNC1382	-2.03331	3.12e-06	0.000102595	down	1738	1592	2217	423	380	694
OS_LNC1385	-3.06735	8.82e-06	0.000249919	down	11431	5735	9942	816	734	2025
OS_LNC1392	-1.25505	0.000627327	0.00885393	down	197	187	198	76	79	116
OS_LNC1394	-1.40496	1.46e-05	0.000383633	down	508	497	421	232	245	138
OS_LNC1395	1.04014	0.0354722	0.19218	up	43	27	26	68	60	95
OS_LNC1398	1.08838	0.0165701	0.110894	up	151	93	221	360	351	398
OS_LNC1399	1.03884	0.0209778	0.131459	up	21	43	61	123	87	79
OS_LNC1413	2.02017	0.0104905	0.0791897	up	120	107	30	224	395	533
OS_LNC1417	1.69239	0.00106729	0.013446	up	30	54	20	109	145	118
OS_LNC1420	-1.15151	9.93e-05	0.00194295	down	138	146	131	95	74	46
OS_LNC1431	-2.01826	2.61e-08	1.43e-06	down	136	241	293	67	56	61
OS_LNC1437	2.19657	0.00673251	0.0568594	up	8	8	28	118	85	30
OS_LNC1441	-2.01642	0.00840265	0.0670716	down	268	401	475	250	49	45
OS_LNC1448	-4.4383	3.45e-10	2.85e-08	down	358	607	805	22	14	52
OS_LNC1468	-2.81019	6.98e-07	2.76e-05	down	2819	1307	3666	666	296	346
OS_LNC1469	-2.39443	0.000128371	0.00240944	down	360	476	892	197	53	128
OS_LNC1472	-3.28231	4.77e-09	3.09e-07	down	115	54	119	13	10	11
OS_LNC1478	1.04268	0.000206073	0.00355629	up	25	26	34	74	65	59
OS_LNC1480	1.168	0.00357943	0.03509	up	90	136	101	201	305	298
OS_LNC1484	3.30201	0.0351531	0.190998	up	3	5	1	9	2	82
OS_LNC1485	1.43885	0.00865634	0.0685743	up	157	188	68	470	305	496
OS_LNC1486	1.78088	0.0119925	0.0873394	up	6	7	24	56	33	53
OS_LNC1487	-1.36849	0.011026	0.0821288	down	51	84	113	59	34	18
OS_LNC1491	2.08716	0.035432	0.192072	up	15	55	16	170	27	208
OS_LNC1493	-1.21912	0.0165708	0.110894	down	708	393	486	188	319	258
OS_LNC1496	1.38952	3.66e-07	1.55e-05	up	53	52	54	148	168	151
OS_LNC1507	1.1718	0.00127007	0.0154899	up	57	65	34	167	119	117
OS_LNC1512	3.80272	0.00202383	0.022429	up	5	2	3	9	30	110
OS_LNC1518	-2.18074	0.00556932	0.0492628	down	136	169	352	113	43	17
OS_LNC1526	-2.18004	3.03e-05	0.000715775	down	104	132	178	20	35	44
OS_LNC1527	3.53231	2.14e-13	3.18e-11	up	29	29	22	375	211	458
OS_LNC1528	1.06748	0.00105115	0.0133075	up	65	63	53	138	123	165
OS_LNC1532	1.409	0.0198017	0.12619	up	74	109	78	243	120	402
OS_LNC1537	1.46097	0.0186737	0.120909	up	183	138	170	348	307	830
OS_LNC1542	2.11838	7.84e-13	1.06e-10	up	2578	1824	2569	11456	11589	11194
OS_LNC1545	1.4229	0.00258007	0.0271143	up	59	60	47	117	156	217
OS_LNC1549	-1.55715	4.72e-05	0.00104229	down	1035	741	1052	312	328	434
OS_LNC1550	-1.46585	1.23e-06	4.56e-05	down	76	83	78	43	22	33
OS_LNC1559	-1.35118	0.0271956	0.158846	down	72	127	165	44	30	81
OS_LNC1561	1.46222	0.000238147	0.00399324	up	52	60	35	232	120	120
OS_LNC1562	-2.68784	0.0082925	0.0664111	down	27	472	388	56	38	55
OS_LNC1573	1.10048	5.18e-06	0.000159213	up	46	58	47	156	100	113
OS_LNC1580	-1.52301	0.000834719	0.0110926	down	36	56	34	23	10	17
OS_LNC1584	-1.5877	0.000897378	0.0117621	down	1193	1351	1448	348	388	713
OS_LNC1585	-1.24302	0.0131195	0.0932531	down	2269	3052	1915	816	910	1615
OS_LNC1586	-1.37066	0.0416776	0.215919	down	316	502	339	89	110	280
OS_LNC1589	-4.11265	0.00175174	0.0199642	down	151	6	34	3	5	5
OS_LNC1594	1.19037	0.0295488	0.168442	up	78	104	121	505	173	144
OS_LNC1604	1.78385	0.00448738	0.0416988	up	142	483	437	1050	1053	1815
OS_LNC1615	1.26987	6.48e-05	0.00136246	up	31	33	44	95	89	107
OS_LNC1616	2.08249	0.00415999	0.0393591	up	13	15	16	41	124	39
OS_LNC1618	-1.82737	0.00245573	0.0261218	down	413	238	130	95	74	87
OS_LNC1619	-1.79021	1.46e-06	5.28e-05	down	480	1108	899	313	218	270
OS_LNC1620	-2.42509	9.79e-05	0.0019217	down	180	111	365	66	47	28
OS_LNC1625	-1.29069	0.000662896	0.00923992	down	524	426	515	372	165	169
OS_LNC1649	1.41932	0.00306425	0.0310157	up	28	19	26	66	100	54
OS_LNC1666	-5.57811	2.86e-05	0.000680498	down	1030	1272	170	49	15	1
OS_LNC1667	-3.23668	1.13e-06	4.22e-05	down	1080	385	486	125	48	76
OS_LNC1672	2.51796	0.0243558	0.146575	up	6	12	48	116	36	252
OS_LNC1674	2.02647	0.0267433	0.157008	up	2	8	23	37	54	53
OS_LNC1675	-1.03401	0.000108027	0.00208772	down	182	229	289	127	120	134
OS_LNC1676	-1.28	0.0438485	0.223642	down	196	394	338	264	132	53
OS_LNC1679	-1.58338	1.05e-10	9.39e-09	down	373	311	342	172	115	108
OS_LNC1686	-1.01996	0.0142467	0.0992187	down	216	185	187	174	64	102
OS_LNC1693	3.43532	1.47e-12	1.89e-10	up	31	32	14	283	353	300
OS_LNC1706	-1.00862	0.0353341	0.191659	down	21	33	52	23	16	20
OS_LNC1711	-5.60646	0.000339133	0.00534582	down	1	193	166	3	3	2
OS_LNC1716	1.20573	6.97e-07	2.76e-05	up	350	397	528	1454	881	1019
OS_LNC1717	1.11763	0.00105923	0.013377	up	71	56	44	164	146	116
OS_LNC1727	1.66408	0.00152043	0.0178554	up	10	21	16	67	32	68
OS_LNC1728	1.98429	0.00157608	0.0183432	up	127	60	55	308	519	269
OS_LNC1744	1.08879	4.76e-08	2.46e-06	up	136	184	174	397	380	397
OS_LNC1747	-1.70717	0.0039625	0.0378463	down	78	149	76	58	35	15
OS_LNC1754	1.63486	0.0394617	0.207427	up	4	6	16	26	18	44
OS_LNC1761	-1.47624	0.0186015	0.120589	down	35	29	21	14	5	16
OS_LNC1764	-1.38842	1.63e-05	0.000421728	down	284	399	241	187	111	108
OS_LNC1769	-1.64761	0.0349084	0.189988	down	145	339	295	29	131	101
OS_LNC1776	1.88679	0.0266809	0.156725	up	168	211	58	225	661	854
OS_LNC1782	-1.65191	9.02e-05	0.00179485	down	273	222	228	119	49	98
OS_LNC1787	1.67972	0.00163215	0.0188533	up	7	9	19	38	43	43
OS_LNC1791	1.36206	8.43e-06	0.000240716	up	38	61	47	144	161	115
OS_LNC1794	1.44108	0.00230688	0.0248971	up	1065	1443	1312	2458	5348	3491
OS_LNC1795	2.66458	0.000992221	0.0127298	up	39	26	24	115	108	394
OS_LNC1796	1.81427	0.00065128	0.00912062	up	66	46	59	136	269	257
OS_LNC1799	-1.27448	1.04e-06	3.92e-05	down	1103	1112	1128	756	480	368
OS_LNC1811	1.18257	0.00264075	0.0276239	up	146	192	220	796	332	350
OS_LNC1812	4.02202	0.000127172	0.00239099	up	12	38	2	553	209	221
OS_LNC1818	-2.12957	2.79e-10	2.33e-08	down	1467	1239	1546	339	301	447
OS_LNC1821	-2.14802	0.0365725	0.196575	down	151	152	491	123	79	9
OS_LNC1824	1.17842	0.000548566	0.0079388	up	140	217	302	689	551	441
OS_LNC1831	-1.65406	0.000534386	0.00777712	down	764	551	453	342	132	192
OS_LNC1833	3.08863	0.0005034	0.00740398	up	8	70	20	278	413	209
OS_LNC1836	-4.62825	1.08e-10	9.64e-09	down	396	262	521	31	5	20
OS_LNC1842	5.61313	0.00020914	0.00359642	up	4	1	3	11	372	42
OS_LNC1850	1.27612	0.0464233	0.233184	up	70	68	73	239	284	65
OS_LNC1851	-1.59214	0.000640131	0.00900024	down	707	1166	493	264	270	335
OS_LNC1854	1.15901	0.0340429	0.18656	up	46	77	106	264	228	91
OS_LNC1855	-1.63935	9.86e-05	0.00193217	down	571	508	577	172	146	273
OS_LNC1861	-1.03352	0.00107267	0.0135007	down	369	372	382	195	164	254
OS_LNC1863	-1.02098	0.0230094	0.140489	down	36	35	33	14	19	24
OS_LNC1873	-1.39406	0.00061931	0.00876151	down	96	147	125	71	61	28
OS_LNC1875	-1.90638	0.000991343	0.0127228	down	121	85	164	21	43	44
OS_LNC1881	1.82725	0.0177667	0.116731	up	86	295	208	318	1136	742
OS_LNC1888	-1.29891	1.44e-10	1.26e-08	down	1308	1396	1087	678	516	560
OS_LNC1889	-1.43468	0.0407689	0.212554	down	1376	549	454	317	241	457
OS_LNC1893	-1.03315	3.74e-06	0.000119453	down	444	371	482	275	243	204
OS_LNC1896	2.636	7.09e-07	2.8e-05	up	70	52	31	280	400	388
OS_LNC1898	1.80011	0.00105583	0.0133537	up	66	42	31	167	250	135
OS_LNC1899	2.95583	1.54e-12	1.96e-10	up	65	46	102	642	541	673
OS_LNC1901	-1.09746	0.00208007	0.0229083	down	452	303	287	203	182	174
OS_LNC1904	3.05523	0.000105993	0.00205404	up	181	400	480	7421	1966	1205
OS_LNC1907	1.89974	0.0351514	0.190998	up	55	38	33	459	64	72
OS_LNC1913	1.02028	2e-07	9.01e-06	up	218	282	311	650	559	632
OS_LNC1923	-1.14382	0.00433313	0.0406516	down	182	151	176	102	111	51

## Sheet: RSV
LncRNA_name	log2FC	pvalue	FDR	regulations	CK1	CK2	CK3	RSV1	RSV2	RSV3
OS_LNC0001	-3.04704	0.000386672	0.0120326	down	83	772	301	39	45	61
OS_LNC0006	3.11488	0.0431554	0.176975	up	9	2	2	8	4	113
OS_LNC0033	1.38796	0.0475435	0.185631	up	115	113	68	401	334	91
OS_LNC0035	-1.1622	0.0202594	0.127561	down	61	137	158	57	39	71
OS_LNC0037	1.18884	0.0445803	0.179849	up	18	42	19	93	41	56
OS_LNC0039	-1.23792	0.0118835	0.101108	down	38	51	97	26	26	31
OS_LNC0053	-1.99757	0.0247816	0.138606	down	23	28	86	4	13	19
OS_LNC0068	-2.68866	0.0146597	0.111359	down	25	269	443	14	51	53
OS_LNC0096	-2.6025	0.00214776	0.0384764	down	26	207	165	21	17	30
OS_LNC0105	1.45706	0.00573757	0.0705957	up	89	83	39	242	132	249
OS_LNC0113	1.03351	2.03e-05	0.00133817	up	75	84	70	147	194	157
OS_LNC0122	-2.0241	0.00326497	0.0498183	down	192	456	677	56	106	179
OS_LNC0130	-3.17334	0.000539508	0.0151365	down	38	404	193	24	16	33
OS_LNC0131	-2.74534	3.02e-11	8.81e-09	down	340	214	415	41	62	51
OS_LNC0136	-1.49178	0.0386727	0.168072	down	234	224	75	45	112	46
OS_LNC0141	1.55232	7e-05	0.00347859	up	69	86	88	198	360	195
OS_LNC0165	1.58778	0.0287149	0.147406	up	234	118	60	598	502	246
OS_LNC0176	-1.41729	0.00102246	0.0234512	down	464	883	773	401	221	213
OS_LNC0188	3.29619	0.00276025	0.0447799	up	3	6	6	69	6	81
OS_LNC0191	-3.66729	2.56e-05	0.0016157	down	27	104	200	11	10	6
OS_LNC0202	4.67103	8.6e-12	2.69e-09	up	6	8	2	126	208	99
OS_LNC0204	-3.24915	6.25e-06	0.000520533	down	63	222	317	20	16	30
OS_LNC0217	-1.64547	1.03e-05	0.000788725	down	669	825	1187	225	278	403
OS_LNC0259	-1.60848	0.0155347	0.114144	down	50	232	223	60	61	51
OS_LNC0262	1.41223	0.0270383	0.143534	up	740	514	183	1255	1640	1245
OS_LNC0270	-1.3275	0.0121708	0.102337	down	55	82	67	13	35	38
OS_LNC0272	-1.89584	0.00466096	0.0628362	down	19	61	37	10	7	16
OS_LNC0277	1.31029	0.00127766	0.0274633	up	159	98	83	322	325	261
OS_LNC0279	-2.27284	0.00401101	0.0568755	down	16	63	88	9	10	17
OS_LNC0284	-3.41393	0.00601306	0.0721826	down	13	103	7	3	4	5
OS_LNC0303	-1.02917	0.0416055	0.174074	down	51	45	109	37	39	30
OS_LNC0310	-2.2723	5.49e-06	0.000465364	down	27	30	34	9	4	7
OS_LNC0311	-2.21028	0.00685306	0.0776652	down	102	174	134	38	6	50
OS_LNC0322	1.04899	0.015454	0.113922	up	84	175	116	190	266	362
OS_LNC0329	-2.51562	0.000756744	0.0191386	down	474	1729	2325	135	309	380
OS_LNC0331	-1.4207	0.0357425	0.162098	down	90	410	172	64	84	114
OS_LNC0350	-3.67892	0.00319405	0.0491134	down	11	94	353	18	5	14
OS_LNC0364	-1.68169	0.00502442	0.0654713	down	217	378	771	194	101	151
OS_LNC0373	-1.03961	0.005785	0.0709505	down	56	44	52	22	22	35
OS_LNC0376	1.19241	0.0290409	0.148147	up	26	92	43	125	135	125
OS_LNC0383	-1.13513	0.0361175	0.162712	down	39	42	88	32	31	18
OS_LNC0396	-1.12464	0.0125997	0.104041	down	161	116	154	101	66	44
OS_LNC0405	3.27896	0.000772871	0.0194506	up	106	22	26	952	498	194
OS_LNC0416	-1.51562	0.031671	0.153811	down	137	757	734	180	190	221
OS_LNC0435	-1.79335	0.036508	0.163309	down	18	157	130	24	36	31
OS_LNC0437	-2.71968	0.000830901	0.0203862	down	27	138	75	18	6	14
OS_LNC0447	-2.75045	0.0245876	0.138155	down	8	323	389	45	39	26
OS_LNC0459	1.08875	0.0255999	0.140316	up	9	8	14	19	23	28
OS_LNC0465	-1.55624	0.00255944	0.0428014	down	34	30	38	11	7	19
OS_LNC0470	-3.24637	4.06e-08	6.23e-06	down	67	198	144	15	20	10
OS_LNC0482	-1.76862	0.0207612	0.129054	down	46	231	324	52	61	70
OS_LNC0488	-3.77426	0.0014982	0.0303783	down	110	328	2755	59	92	90
OS_LNC0493	-1.72737	0.00037871	0.0118567	down	234	462	738	148	158	147
OS_LNC0494	1.18437	7.35e-08	1.08e-05	up	119	119	133	354	280	262
OS_LNC0495	-1.78037	0.0316991	0.153856	down	6	31	29	5	7	8
OS_LNC0510	2.12632	1.31e-08	2.23e-06	up	11	26	19	92	81	85
OS_LNC0544	2.25737	0.000252897	0.00887923	up	35	51	80	125	308	403
OS_LNC0556	-2.06363	0.0149864	0.112515	down	22	161	115	15	24	35
OS_LNC0558	1.14206	0.0232396	0.134928	up	11	26	33	64	53	45
OS_LNC0574	1.32615	0.000101717	0.00464553	up	93	68	70	203	252	164
OS_LNC0578	1.6988	2.34e-05	0.00150724	up	107	64	67	211	307	313
OS_LNC0591	-1.25727	0.0039443	0.0562403	down	73	188	161	65	58	62
OS_LNC0598	-2.85327	0.00594247	0.071801	down	32	554	135	38	32	33
OS_LNC0644	-3.5863	0.000511983	0.0146798	down	29	502	528	32	26	33
OS_LNC0654	3.2228	0.00016093	0.00641459	up	8	8	7	127	81	20
OS_LNC0697	-1.71753	0.0224855	0.132904	down	30	197	128	44	34	34
OS_LNC0712	1.06943	0.0117867	0.100665	up	42	27	22	66	78	61
OS_LNC0729	-1.12825	2.89e-05	0.00179277	down	99	155	154	60	71	66
OS_LNC0731	1.97182	0.00233683	0.0403785	up	102	125	174	1012	270	381
OS_LNC0756	-4.92968	0.000286232	0.00969583	down	6	480	464	14	12	6
OS_LNC0768	-1.90407	0.0454332	0.181482	down	8	83	90	13	18	19
OS_LNC0771	-2.02079	0.00229928	0.0400216	down	158	87	369	65	44	51
OS_LNC0772	-2.03132	0.0350904	0.160703	down	82	29	227	13	48	26
OS_LNC0785	-2.24595	0.00746435	0.0809861	down	65	260	47	37	26	19
OS_LNC0813	-1.3171	0.0249226	0.138834	down	65	213	102	47	41	72
OS_LNC0825	-1.45433	0.0460326	0.182703	down	186	179	216	140	61	24
OS_LNC0866	-1.44888	0.0136683	0.107804	down	37	86	133	25	36	37
OS_LNC0941	1.29202	0.000472887	0.0138477	up	16	26	35	62	64	73
OS_LNC0957	-1.45817	0.0371715	0.16492	down	32	74	91	10	34	31
OS_LNC0959	-6.05423	0.000675161	0.0177104	down	25	1	165	1	1	1
OS_LNC0960	-4.28573	0.000945471	0.0222026	down	7	190	162	12	2	5
OS_LNC0961	-2.51368	0.00972146	0.0925169	down	12	130	146	17	22	13
OS_LNC0963	-1.20917	0.00509053	0.0660397	down	108	57	80	43	31	40
OS_LNC0971	1.18204	0.0010757	0.024177	up	46	40	32	121	85	80
OS_LNC0985	1.4729	5.47e-07	6.32e-05	up	105	135	90	340	370	262
OS_LNC0986	1.48945	0.000387604	0.0120495	up	123	163	69	399	325	338
OS_LNC1012	-3.29209	0.000257474	0.00900397	down	36	311	230	11	23	27
OS_LNC1015	-1.29022	0.0353182	0.161198	down	221	62	165	65	73	60
OS_LNC1022	-1.12247	0.020791	0.129137	down	31	40	46	18	11	28
OS_LNC1031	-1.43984	0.00569931	0.070243	down	30	72	40	19	22	14
OS_LNC1032	-2.2933	0.0106872	0.096517	down	20	72	20	12	3	9
OS_LNC1056	1.44981	1.38e-07	1.89e-05	up	331	253	274	681	953	872
OS_LNC1059	-2.6206	0.000946629	0.0222131	down	39	219	67	22	17	16
OS_LNC1062	-2.03838	0.0353341	0.161207	down	22	140	48	6	29	18
OS_LNC1077	-3.0802	0.00589727	0.0715186	down	4212	4533	6310	1018	34	843
OS_LNC1085	-2.10636	0.00518312	0.0667327	down	33	139	68	11	30	17
OS_LNC1095	-1.89899	0.00107289	0.0241226	down	101	248	409	68	73	71
OS_LNC1097	1.45209	0.00525276	0.067168	up	21	13	18	31	67	54
OS_LNC1101	-1.4822	0.0482932	0.186636	down	63	55	61	8	44	16
OS_LNC1138	-1.81115	0.0147161	0.11151	down	32	164	141	25	27	48
OS_LNC1144	1.02787	0.000212212	0.00785847	up	48	46	48	82	115	111
OS_LNC1148	1.27703	0.0326473	0.155712	up	337	113	139	507	599	448
OS_LNC1149	1.08816	0.0238791	0.136427	up	184	107	75	251	285	306
OS_LNC1183	-1.77118	0.0101851	0.094576	down	1316	317	1033	386	205	255
OS_LNC1186	1.24326	0.000385694	0.0120143	up	48	43	48	86	150	114
OS_LNC1197	1.24356	0.0258491	0.140736	up	44	64	97	173	244	92
OS_LNC1201	-1.12287	0.0104152	0.0953295	down	87	209	139	84	54	72
OS_LNC1214	-1.72807	0.00525101	0.0671649	down	454	416	895	233	81	251
OS_LNC1217	-2.41392	0.0291833	0.148504	down	6	29	94	5	12	8
OS_LNC1219	-1.50859	0.0115968	0.100024	down	116	462	228	109	78	109
OS_LNC1243	-1.08181	0.0300859	0.150254	down	49	113	121	33	58	49
OS_LNC1244	1.18435	0.00549571	0.0689573	up	70	38	39	139	107	114
OS_LNC1246	-3.02823	0.00451538	0.0616428	down	49	250	29	25	7	10
OS_LNC1247	-3.37732	0.00469835	0.0631192	down	6	240	188	13	15	15
OS_LNC1254	-5.40236	0.000203548	0.00762475	down	3	58	62	1	1	1
OS_LNC1286	1.31966	0.0189199	0.124189	up	126	51	56	262	204	165
OS_LNC1293	1.47638	0.0142044	0.109685	up	21	14	19	38	87	35
OS_LNC1298	-2.09034	4.62e-05	0.00253841	down	289	678	878	111	167	175
OS_LNC1300	-1.69175	0.00225571	0.0395524	down	196	513	756	167	154	152
OS_LNC1307	-3.56259	3.83e-06	0.000343187	down	47	288	143	12	16	14
OS_LNC1313	-2.61297	0.000352952	0.0112794	down	20	29	62	6	9	4
OS_LNC1336	1.79865	0.0415626	0.173966	up	110	42	19	313	237	101
OS_LNC1351	-2.93261	0.00365024	0.0535987	down	11	115	133	16	12	7
OS_LNC1395	1.14562	0.00908605	0.0896209	up	43	27	26	98	68	62
OS_LNC1396	1.09799	0.00153813	0.0308142	up	40	42	53	96	131	79
OS_LNC1404	-1.5141	0.00502006	0.0654564	down	3048	4919	5283	870	1374	2657
OS_LNC1407	-3.53232	0.00101624	0.0233607	down	7	56	105	4	6	5
OS_LNC1431	-1.16311	0.00586652	0.0713451	down	136	241	293	89	85	141
OS_LNC1448	-1.47499	0.000536421	0.0151018	down	358	607	805	174	198	298
OS_LNC1455	-4.06352	0.000118875	0.00517362	down	10	138	95	4	6	5
OS_LNC1456	1.79086	0.00875411	0.0880205	up	41	23	26	148	143	43
OS_LNC1459	-2.93394	0.00807577	0.0844058	down	30	65	353	10	15	36
OS_LNC1465	-3.44276	0.00153754	0.0308142	down	13	265	292	19	19	16
OS_LNC1467	-3.82148	0.00311708	0.0483281	down	5	146	274	16	6	9
OS_LNC1470	3.35536	0.000767042	0.0193673	up	459	48	76	2245	2292	2106
OS_LNC1487	-1.39502	0.00262305	0.0433768	down	51	84	113	36	40	23
OS_LNC1512	2.69138	0.0211334	0.129972	up	5	2	3	28	3	39
OS_LNC1527	1.75569	0.0285854	0.147092	up	29	29	22	192	62	34
OS_LNC1561	2.42178	0.00739405	0.0806208	up	52	60	35	421	369	46
OS_LNC1562	-2.81528	0.00527748	0.0673151	down	27	472	388	35	46	49
OS_LNC1573	1.47589	4.12e-12	1.39e-09	up	46	58	47	141	147	158
OS_LNC1588	1.66406	0.0103411	0.0950752	up	25	91	65	196	113	292
OS_LNC1589	-3.56161	0.006469	0.074987	down	151	6	34	10	5	3
OS_LNC1611	-2.7337	1.84e-16	1.45e-13	down	126	119	111	20	23	14
OS_LNC1619	-1.15219	0.00276949	0.0448825	down	480	1108	899	343	454	376
OS_LNC1624	1.04358	0.0156741	0.114528	up	29	56	25	77	72	91
OS_LNC1656	-1.15045	0.0222933	0.132535	down	89	223	167	100	76	50
OS_LNC1681	-2.40876	0.00393081	0.0561444	down	635	147	1045	141	154	71
OS_LNC1694	-3.71793	0.00403068	0.0570421	down	5	331	124	15	9	12
OS_LNC1721	-3.52663	0.0038746	0.0556849	down	1190	53	147	41	58	36
OS_LNC1724	1.1194	0.0266142	0.142693	up	291	480	155	772	692	672
OS_LNC1734	-2.44744	0.029381	0.148919	down	22	175	66	37	7	6
OS_LNC1735	1.4046	0.000523292	0.0148987	up	182	144	101	326	513	373
OS_LNC1752	-1.91531	0.00275203	0.0447474	down	31	112	118	23	29	20
OS_LNC1763	-1.87375	0.0436226	0.177931	down	224	180	336	10	113	91
OS_LNC1768	-4.10424	0.00148173	0.030205	down	9	214	430	19	15	5
OS_LNC1769	-1.2941	0.00152815	0.0307342	down	145	339	295	93	126	114
OS_LNC1771	-2.74156	0.0170491	0.118993	down	6	174	177	16	19	20
OS_LNC1772	2.55058	0.0300184	0.150181	up	122	35	91	237	1252	68
OS_LNC1784	-3.16519	0.00532282	0.0676688	down	6	62	149	8	7	10
OS_LNC1795	2.2759	1.94e-10	4.73e-08	up	39	26	24	177	134	151
OS_LNC1801	1.94096	0.027234	0.144033	up	92	177	28	549	499	158
OS_LNC1812	3.44405	0.00102492	0.0234807	up	12	38	2	219	265	110
OS_LNC1834	-2.59066	0.0112346	0.0987842	down	34	529	324	81	35	36
OS_LNC1836	-2.04038	0.0127342	0.104575	down	396	262	521	34	62	211
OS_LNC1841	-2.82847	0.0110285	0.0980466	down	111	1502	3463	167	272	298
OS_LNC1847	2.69683	0.00843369	0.0863049	up	421	380	27	1679	2629	1491
OS_LNC1851	-1.54099	0.000201852	0.00757967	down	707	1166	493	314	278	270
OS_LNC1852	2.18405	0.0130836	0.105634	up	62	12	43	351	117	109
OS_LNC1870	-1.95008	0.0364443	0.163162	down	15	127	150	17	37	24
OS_LNC1880	-1.71001	0.0438872	0.178511	down	11	40	65	11	7	19
OS_LNC1884	1.73168	0.00844399	0.0863655	up	10	23	7	37	66	37
OS_LNC1896	1.16191	0.00814348	0.0847485	up	70	52	31	126	131	111
OS_LNC1904	2.41054	0.00741554	0.080741	up	181	400	480	475	3994	1403
OS_LNC1907	3.02119	1.27e-05	0.000923167	up	55	38	33	132	570	395
OS_LNC1919	-1.8655	0.0173756	0.119772	down	32	182	108	43	17	32
