# Supplementary material for: Transcriptional Landscape of Pathogen-responsive Lncrnas Reveals OS_LNC1812-Induced Disease Resistance by Abscisic Acid Pathway in Rice
Source: Research Square preprint supplement (doi:10.21203/rs.3.rs-244393/v1), 2021-03-01
Supplement: Supplementary file 14 [file 7f10bee4fee877563a0a1890.xlsx]

## Sheet: tableS6_1
lncRNA_name	partnerRNA_gene	partnerRNA_transcript	direction	type	distance	subtype	location	Description
OS_LNC1065	Os05g0499100	Os05t0499100-01	antisense	intergenic	7934	convergent	downstream	26 kDa globulin.
OS_LNC1899	Os10g0558900	Os10t0558900-01	antisense	intergenic	1078	convergent	downstream	2OG-Fe oxygenase family protein, Regulation of the secondary cell wall formation in leaves, Modulation of leaf rolling
OS_LNC1900	Os10g0558900	Os10t0558900-01	antisense	genic	0	overlapping	exonic	2OG-Fe oxygenase family protein, Regulation of the secondary cell wall formation in leaves, Modulation of leaf rolling
OS_LNC1901	Os10g0558900	Os10t0558900-01	sense	intergenic	9385	same_strand	upstream	2OG-Fe oxygenase family protein, Regulation of the secondary cell wall formation in leaves, Modulation of leaf rolling
OS_LNC1902	Os10g0558900	Os10t0558900-01	sense	intergenic	9387	same_strand	upstream	2OG-Fe oxygenase family protein, Regulation of the secondary cell wall formation in leaves, Modulation of leaf rolling
OS_LNC0130	Os11g0657200	Os11t0657200-01	antisense	intergenic	288	divergent	upstream	2OG-Fe(II) oxygenase domain containing protein.
OS_LNC0547	Os01g0351800	Os01t0351800-01	antisense	intergenic	3178	convergent	downstream	2OG-Fe(II) oxygenase domain containing protein.
OS_LNC0655	Os03g0439500	Os03t0439500-03	sense	intergenic	7264	same_strand	downstream	2OG-Fe(II) oxygenase domain containing protein.
OS_LNC1152	Os06g0255100	Os06t0255100-01	sense	genic	0	overlapping	exonic	2OG-Fe(II) oxygenase domain containing protein.
OS_LNC1730	Os01g0830500	Os01t0830500-01	sense	intergenic	2004	same_strand	downstream	2OG-Fe(II) oxygenase domain containing protein.
OS_LNC1901	Os10g0559500	Os10t0559500-01	sense	intergenic	9771	same_strand	downstream	2OG-Fe(II) oxygenase domain containing protein.
OS_LNC1902	Os10g0559500	Os10t0559500-01	sense	intergenic	9806	same_strand	downstream	2OG-Fe(II) oxygenase domain containing protein.
OS_LNC1297	Os07g0173700	Os07t0173700-00	sense	intergenic	7060	same_strand	downstream	40S ribosomal protein S18.
OS_LNC1255	Os06g0656500	Os06t0656500-02	antisense	genic	0	overlapping	exonic	4-coumarate:coenzyme A ligase, Lignin biosynthesis, Defense against wounding
OS_LNC1255	Os06g0656500	Os06t0656500-01	antisense	genic	0	overlapping	exonic	4-coumarate:coenzyme A ligase, Lignin biosynthesis, Defense against wounding
OS_LNC1102	Os06g0133900	Os06t0133900-01	sense	intergenic	9821	same_strand	upstream	5-enolpyruvylshikimate-3-phosphate synthase
OS_LNC0713	Os03g0699700	Os03t0699700-01	antisense	intergenic	12	divergent	upstream	9-lipoxigenase.
OS_LNC1247	Os06g0614000	Os06t0614000-01	antisense	intergenic	1773	convergent	downstream	A member of the family of multiple C2 domain and transmembrane region proteins, Mediation of flowering time, Regulation of florigen transport
OS_LNC0536	Os02g0826500	Os02t0826500-01	antisense	intergenic	6666	convergent	downstream	ABC transporter-like domain containing protein.
OS_LNC0656	Os03g0441500	Os03t0441500-02	sense	intergenic	3200	same_strand	upstream	ABC transporter-like domain containing protein.
OS_LNC0656	Os03g0441500	Os03t0441500-01	sense	intergenic	2444	same_strand	upstream	ABC transporter-like domain containing protein.
OS_LNC1385	Os07g0558000	Os07t0558000-01	antisense	intergenic	2047	divergent	upstream	ABC-1 domain containing protein.
OS_LNC0956	Os05g0149400	Os05t0149400-01	antisense	genic	0	overlapping	exonic	ACC oxidase, Ethylene biosynthesis
OS_LNC1690	Os09g0451000	Os09t0451000-01	sense	intergenic	5733	same_strand	downstream	ACC oxidase, Ethylene biosynthesis
OS_LNC1691	Os09g0451000	Os09t0451000-01	sense	intergenic	5733	same_strand	downstream	ACC oxidase, Ethylene biosynthesis
OS_LNC1692	Os09g0451000	Os09t0451000-01	sense	intergenic	574	same_strand	downstream	ACC oxidase, Ethylene biosynthesis
OS_LNC1075	Os05g0548800	Os05t0548800-01	sense	genic	0	containing	exonic	Acid phosphatase/vanadium-dependent haloperoxidase related family protein.
OS_LNC1076	Os05g0548800	Os05t0548800-01	sense	genic	0	containing	exonic	Acid phosphatase/vanadium-dependent haloperoxidase related family protein.
OS_LNC1785	Os10g0119300	Os10t0119300-01	antisense	genic	0	containing	intronic	Actin-binding FH2 domain containing protein.
OS_LNC1329	Os07g0264800	Os07t0264800-01	sense	intergenic	8314	same_strand	downstream	Acyl-CoA N-acyltransferase domain containing protein.
OS_LNC1882	Os10g0500400	Os10t0500400-01	sense	genic	0	overlapping	exonic	Acyl-CoA N-acyltransferase domain containing protein.
OS_LNC1710	Os09g0534000	Os09t0534000-01	sense	intergenic	570	same_strand	downstream	Adipose-regulatory protein, Seipin domain containing protein.
OS_LNC0960	Os05g0151400	Os05t0151400-01	antisense	intergenic	9209	divergent	upstream	AIG1 domain containing protein.
OS_LNC0723	Os03g0735300	Os03t0735300-02	antisense	intergenic	1880	divergent	upstream	Alba, DNA/RNA-binding protein family protein.
OS_LNC0723	Os03g0735300	Os03t0735300-01	antisense	intergenic	25	divergent	upstream	Alba, DNA/RNA-binding protein family protein.
OS_LNC1767	Os01g0173100	Os01t0173100-01	sense	genic	0	containing	exonic	Alba, DNA/RNA-binding protein family protein.
OS_LNC1701	Os09g0503000	Os09t0503000-01	sense	intergenic	81	same_strand	upstream	Alcohol dehydrogenase superfamily, zinc-containing protein.
OS_LNC0717	Os03g0713600	Os03t0713600-01	antisense	intergenic	2407	divergent	upstream	Aldo/keto reductase domain containing protein.
OS_LNC0685	Os03g0611200	Os03t0611200-01	sense	intergenic	8325	same_strand	upstream	Aldo/keto reductase family protein.
OS_LNC0222	Os12g0286600	Os12t0286600-01	sense	genic	0	nested	intronic	Alpha/beta hydrolase fold-1 domain containing protein.
OS_LNC0610	Os03g0288300	Os03t0288300-01	sense	intergenic	8348	same_strand	upstream	Alpha/beta hydrolase fold-1 domain containing protein.
OS_LNC1803	Os10g0169800	Os10t0169800-01	antisense	intergenic	2339	divergent	upstream	Alpha/beta hydrolase fold-1 domain containing protein.
OS_LNC1887	Os10g0521400	Os10t0521400-01	sense	intergenic	4462	same_strand	upstream	Alpha/beta hydrolase fold-1 domain containing protein.
OS_LNC0604	Os03g0258200	Os03t0258200-01	sense	intergenic	2291	same_strand	upstream	Alpha/beta hydrolase fold-3 domain containing protein.
OS_LNC1168	Os06g0306600	Os06t0306600-01	sense	intergenic	15908	same_strand	downstream	Alpha/beta hydrolase fold-3 domain containing protein.
OS_LNC1168	Os06g0306600	Os06t0306600-02	sense	intergenic	15890	same_strand	downstream	Alpha/beta hydrolase fold-3 domain containing protein.
OS_LNC1169	Os06g0306600	Os06t0306600-01	sense	intergenic	15908	same_strand	downstream	Alpha/beta hydrolase fold-3 domain containing protein.
OS_LNC1169	Os06g0306600	Os06t0306600-02	sense	intergenic	15890	same_strand	downstream	Alpha/beta hydrolase fold-3 domain containing protein.
OS_LNC1694	Os09g0462100	Os09t0462100-01	antisense	genic	0	containing	intronic	Alpha/beta hydrolase fold-3 domain containing protein.
OS_LNC1694	Os09g0460700	Os09t0460700-01	antisense	genic	0	containing	intronic	Alpha/beta hydrolase fold-3 domain containing protein.
OS_LNC1694	Os09g0461900	Os09t0461900-01	sense	genic	0	containing	intronic	Alpha/beta hydrolase fold-3 domain containing protein.
OS_LNC1694	Os09g0462200	Os09t0462200-01	sense	genic	0	containing	intronic	Alpha/beta hydrolase fold-3 domain containing protein.
OS_LNC1694	Os09g0461700	Os09t0461700-01	antisense	genic	0	containing	intronic	Alpha/beta hydrolase fold-3 domain containing protein.
OS_LNC1694	Os09g0460400	Os09t0460400-01	antisense	genic	0	containing	intronic	Alpha/beta hydrolase fold-3 domain containing protein.
OS_LNC1694	Os09g0460300	Os09t0460300-01	antisense	genic	0	containing	intronic	Alpha/beta hydrolase fold-3 domain containing protein.
OS_LNC0935	Os04g0692800	Os04t0692800-00	antisense	intergenic	1261	convergent	downstream	Amine oxidase domain containing protein.
OS_LNC0936	Os04g0692800	Os04t0692800-00	antisense	intergenic	3263	convergent	downstream	Amine oxidase domain containing protein.
OS_LNC0478	Os02g0727100	Os02t0727100-01	antisense	intergenic	8629	divergent	upstream	Amino acid transporter, transmembrane domain containing protein.
OS_LNC0971	Os01g0597600	Os01t0597600-01	antisense	intergenic	9392	divergent	upstream	Amino acid transporter, transmembrane domain containing protein.
OS_LNC0972	Os01g0597600	Os01t0597600-01	antisense	intergenic	9395	divergent	upstream	Amino acid transporter, transmembrane domain containing protein.
OS_LNC1737	Os01g0857400	Os01t0857400-01	sense	genic	0	nested	exonic	Amino acid transporter, transmembrane domain containing protein.
OS_LNC1738	Os01g0857400	Os01t0857400-01	sense	genic	0	nested	exonic	Amino acid transporter, transmembrane domain containing protein.
OS_LNC0870	Os04g0435100	Os04t0435100-01	sense	intergenic	1482	same_strand	downstream	Amino acid/polyamine transporter I family protein.
OS_LNC1405	Os07g0616000	Os07t0616000-01	antisense	intergenic	9891	divergent	upstream	Aminoacyl-tRNA synthetase, class I, conserved site domain containing protein.
OS_LNC0436	Os02g0550800	Os02t0550800-01	antisense	genic	0	overlapping	exonic	Ammonium transporter family protein.
OS_LNC0712	Os03g0698800	Os03t0698800-01	antisense	intergenic	4149	divergent	upstream	Ankyrin domain containing protein.
OS_LNC1175	Os06g0318200	Os06t0318200-01	sense	intergenic	645	same_strand	downstream	Ankyrin domain containing protein.
OS_LNC0003	Os11g0182500	Os11t0182500-02	sense	genic	0	containing	exonic	Ankyrin repeat-containing protein, Regulator in basal defense
OS_LNC0003	Os11g0182500	Os11t0182500-01	sense	genic	0	overlapping	exonic	Ankyrin repeat-containing protein, Regulator in basal defense
OS_LNC1694	Os09g0457900	Os09t0457900-01	antisense	genic	0	containing	intronic	AP2/ERF transcription factor, Regulation of the internode elongation
OS_LNC0375	Os02g0272600	Os02t0272600-02	antisense	intergenic	4296	convergent	downstream	Aph-1 family protein.
OS_LNC0375	Os02g0272600	Os02t0272600-01	antisense	intergenic	4277	convergent	downstream	Aph-1 family protein.
OS_LNC0553	Os03g0151100	Os03t0151100-01	antisense	intergenic	8807	convergent	downstream	Appr-1-p processing domain containing protein.
OS_LNC0554	Os03g0151100	Os03t0151100-01	sense	intergenic	9423	same_strand	downstream	Appr-1-p processing domain containing protein.
OS_LNC0916	Os04g0615700	Os04t0615700-01	antisense	intergenic	6757	convergent	downstream	Argonaute and Dicer protein, PAZ domain containing protein.
OS_LNC0366	Os02g0234300	Os02t0234300-01	antisense	intergenic	34	convergent	downstream	Armadillo-like helical domain containing protein.
OS_LNC0591	Os03g0223700	Os03t0223700-01	antisense	intergenic	89	convergent	downstream	Armadillo-like helical domain containing protein.
OS_LNC1074	Os01g0626100	Os01t0626100-01	antisense	intergenic	197	divergent	upstream	Armadillo-like helical domain containing protein.
OS_LNC1384	Os07g0549700	Os07t0549700-01	sense	intergenic	703	same_strand	downstream	Armadillo-like helical domain containing protein.
OS_LNC1725	Os01g0819900	Os01t0819900-01	antisense	intergenic	7368	convergent	downstream	Armadillo-like helical domain containing protein.
OS_LNC1726	Os01g0819900	Os01t0819900-01	antisense	intergenic	7368	convergent	downstream	Armadillo-like helical domain containing protein.
OS_LNC1850	Os10g0406800	Os10t0406800-01	antisense	intergenic	5150	convergent	downstream	Armadillo-like helical domain containing protein.
OS_LNC0539	Os02g0831300	Os02t0831300-02	antisense	intergenic	6671	convergent	downstream	Armadillo-type fold domain containing protein.
OS_LNC0539	Os02g0831300	Os02t0831300-01	antisense	intergenic	6671	convergent	downstream	Armadillo-type fold domain containing protein.
OS_LNC1038	Os05g0421300	Os05t0421300-02	antisense	intergenic	5433	divergent	upstream	Armadillo-type fold domain containing protein.
OS_LNC1038	Os05g0421300	Os05t0421300-01	antisense	intergenic	2112	divergent	upstream	Armadillo-type fold domain containing protein.
OS_LNC1039	Os05g0421300	Os05t0421300-02	antisense	intergenic	5439	divergent	upstream	Armadillo-type fold domain containing protein.
OS_LNC1039	Os05g0421300	Os05t0421300-01	antisense	intergenic	2118	divergent	upstream	Armadillo-type fold domain containing protein.
OS_LNC1400	Os07g0592200	Os07t0592200-03	antisense	intergenic	4491	convergent	downstream	Aspartic protease, Pollen germination and pollen tube growth
OS_LNC1400	Os07g0592200	Os07t0592200-02	antisense	intergenic	4490	convergent	downstream	Aspartic protease, Pollen germination and pollen tube growth
OS_LNC0462	Os02g0649700	Os02t0649700-01	antisense	genic	0	overlapping	exonic	ATPase, AAA-type, core domain containing protein.
OS_LNC1303	Os07g0187400	Os07t0187400-00	sense	intergenic	107	same_strand	downstream	ATPase, AAA-type, core domain containing protein.
OS_LNC0641	Os03g0388100	Os03t0388100-01	sense	genic	0	nested	exonic	ATPase, P-type, K/Mg/Cd/Cu/Zn/Na/Ca/Na/H-transporter domain containing protein.
OS_LNC0641	Os03g0388100	Os03t0388100-02	sense	genic	0	containing	exonic	ATPase, P-type, K/Mg/Cd/Cu/Zn/Na/Ca/Na/H-transporter domain containing protein.
OS_LNC1407	Os07g0623200	Os07t0623200-02	antisense	intergenic	6504	divergent	upstream	ATPase, P-type, K/Mg/Cd/Cu/Zn/Na/Ca/Na/H-transporter domain containing protein.
OS_LNC1407	Os07g0623200	Os07t0623200-01	antisense	intergenic	6477	divergent	upstream	ATPase, P-type, K/Mg/Cd/Cu/Zn/Na/Ca/Na/H-transporter domain containing protein.
OS_LNC0421	Os02g0469900	Os02t0469900-01	sense	intergenic	9982	same_strand	downstream	AT-rich interaction region domain containing protein.
OS_LNC1578	Os08g0484400	Os08t0484400-01	sense	intergenic	786	same_strand	downstream	Bacterial Fmu/eukaryotic nucleolar NOL1/Nop2p domain containing protein.
OS_LNC1579	Os08g0484400	Os08t0484400-01	sense	intergenic	786	same_strand	downstream	Bacterial Fmu/eukaryotic nucleolar NOL1/Nop2p domain containing protein.
OS_LNC0014	Os11g0207300	Os11t0207300-00	sense	intergenic	16830	same_strand	downstream	Bacterial luciferase-like family protein.
OS_LNC1050	Os05g0470800	Os05t0470800-01	antisense	intergenic	5620	convergent	downstream	Bacterial surface antigen family protein.
OS_LNC1051	Os05g0470800	Os05t0470800-01	antisense	intergenic	5620	convergent	downstream	Bacterial surface antigen family protein.
OS_LNC1052	Os05g0470800	Os05t0470800-01	antisense	intergenic	5724	convergent	downstream	Bacterial surface antigen family protein.
OS_LNC0855	Os04g0394700	Os04t0394700-01	sense	intergenic	1371	same_strand	downstream	BAR domain containing protein.
OS_LNC0903	Os04g0565900	Os04t0565900-01	sense	intergenic	2822	same_strand	upstream	Basic helix-loop-helix dimerisation region bHLH domain containing protein.
OS_LNC1257	Os06g0662200	Os06t0662200-01	antisense	intergenic	656	convergent	downstream	Basic leucine zipper transcription factor, Negative regulator of cold and drought stress response
OS_LNC1703	Os09g0515200	Os09t0515200-01	antisense	intergenic	4987	divergent	upstream	Beta 7 subunit of 20S proteasome.
OS_LNC1365	Os07g0489800	Os07t0489800-01	sense	intergenic	1379	same_strand	downstream	Beta-grasp fold, ferredoxin-type domain containing protein.
OS_LNC1559	Os08g0424500	Os08t0424500-01	antisense	intergenic	714	convergent	downstream	Betaine aldehyde dehydrogenase, Rice fragrance
OS_LNC1559	Os08g0424500	Os08t0424500-02	antisense	intergenic	714	convergent	downstream	Betaine aldehyde dehydrogenase, Rice fragrance
OS_LNC1560	Os08g0424500	Os08t0424500-01	antisense	intergenic	816	convergent	downstream	Betaine aldehyde dehydrogenase, Rice fragrance
OS_LNC1560	Os08g0424500	Os08t0424500-02	antisense	intergenic	816	convergent	downstream	Betaine aldehyde dehydrogenase, Rice fragrance
OS_LNC1602	Os08g0540500	Os08t0540500-01	antisense	genic	0	overlapping	exonic	Bicoid-interacting 3 domain containing protein.
OS_LNC1603	Os08g0540500	Os08t0540500-01	antisense	intergenic	437	divergent	upstream	Bicoid-interacting 3 domain containing protein.
OS_LNC1345	Os07g0425000	Os07t0425000-01	sense	intergenic	16854	same_strand	upstream	Biopterin transport-related protein BT1 family protein.
OS_LNC1346	Os07g0425000	Os07t0425000-01	sense	intergenic	26716	same_strand	upstream	Biopterin transport-related protein BT1 family protein.
OS_LNC0473	Os02g0699900	Os02t0699900-01	antisense	genic	0	overlapping	exonic	Bromodomain transcription factor containing protein.
OS_LNC0474	Os02g0699900	Os02t0699900-01	antisense	genic	0	overlapping	exonic	Bromodomain transcription factor containing protein.
OS_LNC1761	Os01g0932600	Os01t0932600-01	sense	intergenic	8079	same_strand	downstream	BTB domain containing protein.
OS_LNC0592	Os03g0224200	Os03t0224200-02	antisense	intergenic	3984	convergent	downstream	B-type response regulator, Cytokinin signaling
OS_LNC0592	Os03g0224200	Os03t0224200-01	antisense	intergenic	3888	convergent	downstream	B-type response regulator, Cytokinin signaling
OS_LNC0020	Os11g0218000	Os11t0218000-01	sense	intergenic	4892	same_strand	downstream	bZIP transcription factor, bZIP-1 domain containing protein.
OS_LNC1247	Os06g0614100	Os06t0614100-01	antisense	intergenic	7761	convergent	downstream	bZIP transcription factor, bZIP-1 domain containing protein.
OS_LNC0489	Os02g0766700	Os02t0766700-01	sense	genic	0	nested	exonic	bZIP transcription factor, Regulation of ABA signaling and biosynthesis, Drought resistance
OS_LNC0574	Os03g0194100	Os03t0194100-01	antisense	intergenic	1884	convergent	downstream	C2 calcium-dependent membrane targeting domain containing protein.
OS_LNC0399	Os02g0327000	Os02t0327000-02	antisense	intergenic	9589	divergent	upstream	C2 domain containing protein.
OS_LNC0399	Os02g0327000	Os02t0327000-01	antisense	intergenic	9503	divergent	upstream	C2 domain containing protein.
OS_LNC1903	Os10g0567000	Os10t0567000-01	sense	intergenic	481	same_strand	upstream	Camphor resistance CrcB protein family protein.
OS_LNC0898	Os01g0570700	Os01t0570700-01	sense	intergenic	6607	same_strand	upstream	Carbamoyl-phosphate synthetase, large subunit, ATP-binding domain containing protein.
OS_LNC0557	Os03g0166800	Os03t0166800-01	sense	intergenic	7554	same_strand	downstream	Carbon catabolite repressor 4, Exonuclease-endonuclease-phosphatase, mRNA deadenylation
OS_LNC0557	Os03g0166800	Os03t0166800-02	sense	intergenic	7554	same_strand	downstream	Carbon catabolite repressor 4, Exonuclease-endonuclease-phosphatase, mRNA deadenylation
OS_LNC1071	Os05g0534600	Os05t0534600-02	sense	intergenic	4847	same_strand	upstream	CASC3/Barentsz eIF4AIII binding domain containing protein.
OS_LNC1071	Os05g0534600	Os05t0534600-01	sense	intergenic	4806	same_strand	upstream	CASC3/Barentsz eIF4AIII binding domain containing protein.
OS_LNC0875	Os01g0130000	Os01t0130000-02	sense	intergenic	7917	same_strand	upstream	Cation efflux protein family protein.
OS_LNC0875	Os01g0130000	Os01t0130000-01	sense	intergenic	5894	same_strand	upstream	Cation efflux protein family protein.
OS_LNC1556	Os08g0422200	Os08t0422200-00	antisense	intergenic	3675	divergent	upstream	Cation efflux protein family protein.
OS_LNC0479	Os02g0731700	Os02t0731700-02	sense	intergenic	9437	same_strand	downstream	CCT domain domain containing protein.
OS_LNC0065	Os11g0473100	Os11t0473100-01	sense	genic	0	nested	exonic	Cdk-activating kinase assembly factor family protein.
OS_LNC0608	Os03g0283600	Os03t0283600-02	sense	intergenic	3084	same_strand	downstream	CDP-alcohol phosphatidyltransferase domain containing protein.
OS_LNC0608	Os03g0283600	Os03t0283600-01	sense	intergenic	3031	same_strand	downstream	CDP-alcohol phosphatidyltransferase domain containing protein.
OS_LNC0987	Os05g0267800	Os05t0267800-01	sense	intergenic	1933	same_strand	upstream	Cellular retinaldehyde-binding/triple function, C-terminal domain containing protein.
OS_LNC0872	Os04g0448600	Os04t0448600-02	antisense	intergenic	7141	divergent	upstream	ChaC-like protein family protein.
OS_LNC0872	Os04g0448600	Os04t0448600-01	antisense	intergenic	7097	divergent	upstream	ChaC-like protein family protein.
OS_LNC0163	Os12g0115700	Os12t0115700-01	antisense	intergenic	9865	convergent	downstream	Chalcone isomerase domain containing protein.
OS_LNC1388	Os07g0571600	Os07t0571600-00	sense	intergenic	4392	same_strand	downstream	Chalcone isomerase domain containing protein.
OS_LNC1389	Os07g0571600	Os07t0571600-00	sense	intergenic	9106	same_strand	upstream	Chalcone isomerase domain containing protein.
OS_LNC1438	Os08g0104700	Os08t0104700-01	antisense	intergenic	9199	divergent	upstream	Chaperonin Cpn60/TCP-1 family protein.
OS_LNC1896	Os10g0543400	Os10t0543400-00	antisense	intergenic	5240	convergent	downstream	Chitinase 8.
OS_LNC0342	Os02g0197600	Os02t0197600-03	antisense	genic	0	overlapping	exonic	Chlorophyll a/b-binding protein type III.
OS_LNC0342	Os02g0197600	Os02t0197600-01	antisense	genic	0	overlapping	exonic	Chlorophyll a/b-binding protein type III.
OS_LNC1670	Os09g0363100	Os09t0363100-01	sense	intergenic	6007	same_strand	upstream	Chloroplast group IIA intron splicing factor CRS1, Splicing of chloroplast group I and II introns, Chloroplast development
OS_LNC0252	Os12g0420200	Os12t0420200-01	antisense	intergenic	5977	divergent	upstream	Chloroplast stem-loop-binding protein of 41 kDa b, Chlorophyll biosynthesis and photosynthesis
OS_LNC1770	Os01g0965400	Os01t0965400-01	sense	intergenic	5368	same_strand	upstream	Chloroplast-targeted UMP kinase, Regulation of leaf colour
OS_LNC1771	Os01g0965400	Os01t0965400-01	sense	intergenic	3119	same_strand	upstream	Chloroplast-targeted UMP kinase, Regulation of leaf colour
OS_LNC0899	Os04g0556500	Os04t0556500-01	antisense	intergenic	13	divergent	upstream	cis-Zeatin-O-glucosyltransferase, Catalyze O-glucosylation of cZ and cZ-riboside
OS_LNC0068	Os11g0484000	Os11t0484000-01	antisense	genic	0	overlapping	exonic	Class II aldolase/adducin, N-terminal family protein.
OS_LNC0069	Os11g0484000	Os11t0484000-01	antisense	intergenic	4296	convergent	downstream	Class II aldolase/adducin, N-terminal family protein.
OS_LNC0291	Os12g0612700	Os12t0612700-01	antisense	intergenic	850	convergent	downstream	Class III homeodomain-leucine zipper protein, Age-dependent leaf senescence
OS_LNC1074	Os01g0626200	Os01t0626200-01	antisense	intergenic	8147	divergent	upstream	Clathrin adaptor, beta-adaptin, appendage, C-terminal subdomain domain containing protein.
OS_LNC1285	Os06g0731800	Os06t0731800-01	sense	intergenic	6396	same_strand	upstream	Clathrin light chain family protein.
OS_LNC1286	Os06g0731800	Os06t0731800-01	sense	intergenic	6396	same_strand	upstream	Clathrin light chain family protein.
OS_LNC0282	Os12g0511300	Os12t0511300-02	antisense	intergenic	7007	convergent	downstream	CLT(CRT-like transporter) protein containing no plastid target signal peptide
OS_LNC0283	Os12g0511300	Os12t0511300-02	antisense	intergenic	7078	convergent	downstream	CLT(CRT-like transporter) protein containing no plastid target signal peptide
OS_LNC1619	Os09g0128600	Os09t0128600-04	sense	intergenic	9476	same_strand	upstream	CMP/dCMP deaminase, zinc-binding domain containing protein.
OS_LNC1619	Os09g0128600	Os09t0128600-02	sense	intergenic	8425	same_strand	upstream	CMP/dCMP deaminase, zinc-binding domain containing protein.
OS_LNC1620	Os09g0128600	Os09t0128600-04	sense	intergenic	9481	same_strand	upstream	CMP/dCMP deaminase, zinc-binding domain containing protein.
OS_LNC1620	Os09g0128600	Os09t0128600-02	sense	intergenic	8430	same_strand	upstream	CMP/dCMP deaminase, zinc-binding domain containing protein.
OS_LNC1094	Os06g0106000	Os06t0106000-01	antisense	intergenic	3172	convergent	downstream	Cobyrinic acid a,c-diamide synthase domain containing protein.
OS_LNC1094	Os06g0106000	Os06t0106000-02	antisense	intergenic	3123	convergent	downstream	Cobyrinic acid a,c-diamide synthase domain containing protein.
OS_LNC0831	Os04g0320100	Os04t0320100-01	antisense	genic	0	nested	exonic	Coenzyme F420 hydrogenase/dehydrogenase beta subunit, N-terminal domain containing protein.
OS_LNC0757	Os03g0849600	Os03t0849600-01	sense	intergenic	19583	same_strand	downstream	COG complex component, COG2 family protein.
OS_LNC0758	Os03g0849600	Os03t0849600-01	sense	intergenic	19619	same_strand	downstream	COG complex component, COG2 family protein.
OS_LNC0555	Os03g0159800	Os03t0159800-01	sense	intergenic	2061	same_strand	downstream	Complex 1 LYR protein family protein.
OS_LNC1273	Os06g0714100	Os06t0714100-01	sense	intergenic	5662	same_strand	downstream	Complex 1 LYR protein family protein.
OS_LNC1566	Os08g0440300	Os08t0440300-04	sense	intergenic	7309	same_strand	upstream	Component of the CCR4-NOTcomplex, Deadenylase, Deadenylation tail shortening), Development and stress response
OS_LNC1566	Os08g0440300	Os08t0440300-03	sense	intergenic	6543	same_strand	upstream	Component of the CCR4-NOTcomplex, Deadenylase, Deadenylation tail shortening), Development and stress response
OS_LNC1566	Os08g0440300	Os08t0440300-01	sense	intergenic	6433	same_strand	upstream	Component of the CCR4-NOTcomplex, Deadenylase, Deadenylation tail shortening), Development and stress response
OS_LNC0035	Os11g0250100	Os11t0250100-01	sense	intergenic	9078	same_strand	upstream	Conserved hypothetical protein.
OS_LNC0042	Os11g0276100	Os11t0276100-01	sense	intergenic	8967	same_strand	downstream	Conserved hypothetical protein.
OS_LNC0046	Os11g0308600	Os11t0308600-01	sense	genic	0	containing	exonic	Conserved hypothetical protein.
OS_LNC0058	Os01g0221400	Os01t0221400-00	antisense	intergenic	5816	convergent	downstream	Conserved hypothetical protein.
OS_LNC0078	Os11g0526800	Os11t0526800-01	sense	intergenic	1621	same_strand	upstream	Conserved hypothetical protein.
OS_LNC0079	Os11g0526800	Os11t0526800-01	sense	intergenic	1649	same_strand	upstream	Conserved hypothetical protein.
OS_LNC0080	Os11g0526800	Os11t0526800-01	sense	intergenic	1939	same_strand	upstream	Conserved hypothetical protein.
OS_LNC0084	Os11g0532900	Os11t0532900-01	sense	intergenic	2255	same_strand	downstream	Conserved hypothetical protein.
OS_LNC0085	Os11g0532900	Os11t0532900-01	sense	intergenic	2255	same_strand	downstream	Conserved hypothetical protein.
OS_LNC0115	Os11g0621400	Os11t0621400-01	antisense	intergenic	2753	divergent	upstream	Conserved hypothetical protein.
OS_LNC0119	Os11g0630300	Os11t0630300-01	sense	intergenic	3246	same_strand	downstream	Conserved hypothetical protein.
OS_LNC0120	Os11g0631825	Os11t0631825-01	antisense	genic	0	overlapping	exonic	Conserved hypothetical protein.
OS_LNC0123	Os11g0636600	Os11t0636600-02	sense	genic	0	nested	exonic	Conserved hypothetical protein.
OS_LNC0123	Os11g0636600	Os11t0636600-01	sense	genic	0	overlapping	exonic	Conserved hypothetical protein.
OS_LNC0133	Os11g0679900	Os11t0679900-01	sense	intergenic	3055	same_strand	upstream	Conserved hypothetical protein.
OS_LNC0135	Os11g0686100	Os11t0686100-01	sense	intergenic	2090	same_strand	downstream	Conserved hypothetical protein.
OS_LNC0135	Os11g0686100	Os11t0686100-02	sense	intergenic	366	same_strand	downstream	Conserved hypothetical protein.
OS_LNC0136	Os11g0689650	Os11t0689650-00	sense	intergenic	19207	same_strand	downstream	Conserved hypothetical protein.
OS_LNC0137	Os11g0689650	Os11t0689650-00	sense	intergenic	19207	same_strand	downstream	Conserved hypothetical protein.
OS_LNC0138	Os11g0689650	Os11t0689650-00	sense	intergenic	19207	same_strand	downstream	Conserved hypothetical protein.
OS_LNC0160	Os01g0238200	Os01t0238200-01	sense	genic	0	containing	exonic	Conserved hypothetical protein.
OS_LNC0160	Os01g0238200	Os01t0238200-02	sense	genic	0	overlapping	exonic	Conserved hypothetical protein.
OS_LNC0161	Os12g0106700	Os12t0106700-01	sense	intergenic	4928	same_strand	downstream	Conserved hypothetical protein.
OS_LNC0161	Os12g0106550	Os12t0106550-01	sense	genic	0	containing	exonic	Conserved hypothetical protein.
OS_LNC0174	Os12g0137400	Os12t0137400-00	antisense	genic	0	overlapping	exonic	Conserved hypothetical protein.
OS_LNC0177	Os12g0159500	Os12t0159500-01	sense	genic	0	overlapping	exonic	Conserved hypothetical protein.
OS_LNC0177	Os12g0159500	Os12t0159500-03	sense	genic	0	containing	exonic	Conserved hypothetical protein.
OS_LNC0179	Os12g0180900	Os12t0180900-01	antisense	intergenic	1698	divergent	upstream	Conserved hypothetical protein.
OS_LNC0180	Os12g0180900	Os12t0180900-01	antisense	intergenic	1698	divergent	upstream	Conserved hypothetical protein.
OS_LNC0181	Os12g0180900	Os12t0180900-01	antisense	intergenic	1686	divergent	upstream	Conserved hypothetical protein.
OS_LNC0182	Os12g0180900	Os12t0180900-01	antisense	intergenic	1726	divergent	upstream	Conserved hypothetical protein.
OS_LNC0183	Os12g0180900	Os12t0180900-01	antisense	intergenic	1700	divergent	upstream	Conserved hypothetical protein.
OS_LNC0184	Os12g0180900	Os12t0180900-01	antisense	intergenic	1698	divergent	upstream	Conserved hypothetical protein.
OS_LNC0185	Os12g0180900	Os12t0180900-01	antisense	intergenic	1706	divergent	upstream	Conserved hypothetical protein.
OS_LNC0186	Os12g0180900	Os12t0180900-01	antisense	intergenic	1686	divergent	upstream	Conserved hypothetical protein.
OS_LNC0187	Os12g0180900	Os12t0180900-01	antisense	intergenic	1698	divergent	upstream	Conserved hypothetical protein.
OS_LNC0188	Os12g0180900	Os12t0180900-01	antisense	intergenic	1700	divergent	upstream	Conserved hypothetical protein.
OS_LNC0189	Os12g0180900	Os12t0180900-01	antisense	intergenic	1686	divergent	upstream	Conserved hypothetical protein.
OS_LNC0201	Os12g0222300	Os12t0222300-01	antisense	genic	0	containing	intronic	Conserved hypothetical protein.
OS_LNC0202	Os12g0222300	Os12t0222300-01	sense	intergenic	1800	same_strand	downstream	Conserved hypothetical protein.
OS_LNC0204	Os12g0225200	Os12t0225200-01	antisense	intergenic	5947	convergent	downstream	Conserved hypothetical protein.
OS_LNC0207	Os12g0233600	Os12t0233600-01	antisense	intergenic	382	convergent	downstream	Conserved hypothetical protein.
OS_LNC0223	Os12g0288600	Os12t0288600-01	antisense	intergenic	6831	convergent	downstream	Conserved hypothetical protein.
OS_LNC0224	Os12g0288600	Os12t0288600-01	sense	intergenic	7639	same_strand	upstream	Conserved hypothetical protein.
OS_LNC0247	Os12g0405400	Os12t0405400-01	antisense	intergenic	9829	divergent	upstream	Conserved hypothetical protein.
OS_LNC0247	Os12g0405300	Os12t0405300-01	sense	intergenic	7220	same_strand	downstream	Conserved hypothetical protein.
OS_LNC0248	Os12g0405300	Os12t0405300-01	sense	intergenic	9366	same_strand	downstream	Conserved hypothetical protein.
OS_LNC0250	Os12g0409600	Os12t0409600-01	sense	intergenic	9993	same_strand	upstream	Conserved hypothetical protein.
OS_LNC0260	Os12g0441700	Os12t0441700-01	antisense	intergenic	5946	convergent	downstream	Conserved hypothetical protein.
OS_LNC0263	Os12g0458900	Os12t0458900-01	sense	genic	0	containing	exonic	Conserved hypothetical protein.
OS_LNC0267	Os12g0481200	Os12t0481200-01	antisense	intergenic	2145	convergent	downstream	Conserved hypothetical protein.
OS_LNC0268	Os12g0481200	Os12t0481200-01	antisense	intergenic	373	convergent	downstream	Conserved hypothetical protein.
OS_LNC0269	Os12g0481200	Os12t0481200-01	sense	intergenic	8762	same_strand	downstream	Conserved hypothetical protein.
OS_LNC0270	Os12g0481200	Os12t0481200-01	sense	intergenic	8762	same_strand	downstream	Conserved hypothetical protein.
OS_LNC0271	Os12g0481200	Os12t0481200-01	sense	intergenic	8762	same_strand	downstream	Conserved hypothetical protein.
OS_LNC0278	Os12g0498800	Os12t0498800-01	antisense	intergenic	6962	convergent	downstream	Conserved hypothetical protein.
OS_LNC0280	Os12g0510000	Os12t0510000-02	sense	intergenic	4129	same_strand	upstream	Conserved hypothetical protein.
OS_LNC0281	Os12g0510000	Os12t0510000-02	sense	intergenic	4129	same_strand	upstream	Conserved hypothetical protein.
OS_LNC0286	Os12g0560600	Os12t0560600-01	antisense	intergenic	8031	divergent	upstream	Conserved hypothetical protein.
OS_LNC0289	Os12g0595300	Os12t0595300-01	sense	intergenic	5076	same_strand	upstream	Conserved hypothetical protein.
OS_LNC0290	Os12g0596600	Os12t0596600-01	sense	intergenic	7425	same_strand	upstream	Conserved hypothetical protein.
OS_LNC0293	Os12g0620600	Os12t0620600-01	sense	intergenic	9709	same_strand	upstream	Conserved hypothetical protein.
OS_LNC0296	Os02g0107350	Os02t0107350-00	sense	genic	0	containing	exonic	Conserved hypothetical protein.
OS_LNC0296	Os02g0107251	Os02t0107251-01	antisense	genic	0	containing	intronic	Conserved hypothetical protein.
OS_LNC0296	Os02g0107300	Os02t0107300-01	sense	genic	0	containing	intronic	Conserved hypothetical protein.
OS_LNC0297	Os02g0107251	Os02t0107251-01	sense	intergenic	6722	same_strand	upstream	Conserved hypothetical protein.
OS_LNC0297	Os02g0107300	Os02t0107300-01	antisense	intergenic	6400	convergent	downstream	Conserved hypothetical protein.
OS_LNC0297	Os02g0107350	Os02t0107350-00	antisense	intergenic	6113	convergent	downstream	Conserved hypothetical protein.
OS_LNC0299	Os02g0119600	Os02t0119600-01	sense	intergenic	90	same_strand	upstream	Conserved hypothetical protein.
OS_LNC0301	Os02g0126000	Os02t0126000-01	sense	intergenic	2354	same_strand	upstream	Conserved hypothetical protein.
OS_LNC0308	Os02g0146500	Os02t0146500-01	antisense	genic	0	overlapping	exonic	Conserved hypothetical protein.
OS_LNC0308	Os02g0142300	Os02t0142300-01	sense	genic	0	containing	intronic	Conserved hypothetical protein.
OS_LNC0308	Os02g0145200	Os02t0145200-01	antisense	genic	0	containing	intronic	Conserved hypothetical protein.
OS_LNC0308	Os02g0145600	Os02t0145600-01	antisense	genic	0	containing	intronic	Conserved hypothetical protein.
OS_LNC0308	Os02g0146500	Os02t0146500-02	antisense	genic	0	overlapping	exonic	Conserved hypothetical protein.
OS_LNC0309	Os02g0142300	Os02t0142300-01	antisense	intergenic	8562	divergent	upstream	Conserved hypothetical protein.
OS_LNC0313	Os02g0145600	Os02t0145600-01	antisense	intergenic	4588	divergent	upstream	Conserved hypothetical protein.
OS_LNC0320	Os02g0156100	Os02t0156100-01	sense	intergenic	8946	same_strand	downstream	Conserved hypothetical protein.
OS_LNC0322	Os02g0163600	Os02t0163600-01	sense	intergenic	9361	same_strand	downstream	Conserved hypothetical protein.
OS_LNC0322	Os02g0163300	Os02t0163300-01	antisense	intergenic	6460	convergent	downstream	Conserved hypothetical protein.
OS_LNC0322	Os02g0163533	Os02t0163533-01	sense	intergenic	1097	same_strand	downstream	Conserved hypothetical protein.
OS_LNC0330	Os02g0173300	Os02t0173300-01	sense	intergenic	564	same_strand	downstream	Conserved hypothetical protein.
OS_LNC0331	Os02g0173300	Os02t0173300-01	sense	intergenic	564	same_strand	downstream	Conserved hypothetical protein.
OS_LNC0335	Os02g0182700	Os02t0182700-01	antisense	intergenic	9705	divergent	upstream	Conserved hypothetical protein.
OS_LNC0336	Os02g0182700	Os02t0182700-01	sense	genic	0	overlapping	exonic	Conserved hypothetical protein.
OS_LNC0337	Os02g0186700	Os02t0186700-01	sense	intergenic	4542	same_strand	upstream	Conserved hypothetical protein.
OS_LNC0350	Os02g0212300	Os02t0212300-00	sense	intergenic	8187	same_strand	downstream	Conserved hypothetical protein.
OS_LNC0350	Os02g0212400	Os02t0212400-00	sense	intergenic	6923	same_strand	downstream	Conserved hypothetical protein.
OS_LNC0350	Os02g0212500	Os02t0212500-01	sense	intergenic	4194	same_strand	downstream	Conserved hypothetical protein.
OS_LNC0362	Os02g0230200	Os02t0230200-01	antisense	intergenic	6813	divergent	upstream	Conserved hypothetical protein.
OS_LNC0362	Os02g0230000	Os02t0230000-02	sense	genic	0	containing	exonic	Conserved hypothetical protein.
OS_LNC0362	Os02g0230000	Os02t0230000-01	sense	genic	0	overlapping	exonic	Conserved hypothetical protein.
OS_LNC0363	Os02g0230000	Os02t0230000-02	antisense	intergenic	8754	divergent	upstream	Conserved hypothetical protein.
OS_LNC0363	Os02g0230000	Os02t0230000-01	antisense	intergenic	8731	divergent	upstream	Conserved hypothetical protein.
OS_LNC0363	Os02g0230200	Os02t0230200-01	sense	intergenic	507	same_strand	downstream	Conserved hypothetical protein.
OS_LNC0367	Os02g0251700	Os02t0251700-01	sense	intergenic	689	same_strand	upstream	Conserved hypothetical protein.
OS_LNC0368	Os02g0251700	Os02t0251700-01	sense	intergenic	689	same_strand	upstream	Conserved hypothetical protein.
OS_LNC0369	Os02g0251700	Os02t0251700-01	sense	intergenic	689	same_strand	upstream	Conserved hypothetical protein.
OS_LNC0370	Os02g0251700	Os02t0251700-01	sense	intergenic	689	same_strand	upstream	Conserved hypothetical protein.
OS_LNC0371	Os02g0251700	Os02t0251700-01	sense	intergenic	689	same_strand	upstream	Conserved hypothetical protein.
OS_LNC0372	Os02g0251700	Os02t0251700-01	sense	intergenic	689	same_strand	upstream	Conserved hypothetical protein.
OS_LNC0373	Os02g0251700	Os02t0251700-01	sense	intergenic	689	same_strand	upstream	Conserved hypothetical protein.
OS_LNC0374	Os02g0255700	Os02t0255700-02	antisense	intergenic	4831	convergent	downstream	Conserved hypothetical protein.
OS_LNC0375	Os02g0272850	Os02t0272850-00	antisense	genic	0	overlapping	exonic	Conserved hypothetical protein.
OS_LNC0382	Os02g0291500	Os02t0291500-01	sense	intergenic	559	same_strand	downstream	Conserved hypothetical protein.
OS_LNC0389	Os01g0299500	Os01t0299500-01	antisense	intergenic	436	convergent	downstream	Conserved hypothetical protein.
OS_LNC0390	Os02g0317700	Os02t0317700-01	sense	genic	0	overlapping	exonic	Conserved hypothetical protein.
OS_LNC0395	Os02g0324200	Os02t0324200-01	sense	genic	0	containing	exonic	Conserved hypothetical protein.
OS_LNC0396	Os02g0324200	Os02t0324200-01	sense	genic	0	containing	exonic	Conserved hypothetical protein.
OS_LNC0397	Os02g0324200	Os02t0324200-01	sense	genic	0	containing	exonic	Conserved hypothetical protein.
OS_LNC0403	Os02g0435600	Os02t0435600-01	sense	intergenic	7735	same_strand	downstream	Conserved hypothetical protein.
OS_LNC0404	Os02g0435400	Os02t0435400-01	sense	intergenic	15154	same_strand	downstream	Conserved hypothetical protein.
OS_LNC0404	Os02g0435400	Os02t0435400-02	sense	intergenic	14539	same_strand	downstream	Conserved hypothetical protein.
OS_LNC0404	Os02g0435600	Os02t0435600-01	sense	intergenic	10519	same_strand	downstream	Conserved hypothetical protein.
OS_LNC0405	Os02g0435400	Os02t0435400-01	sense	intergenic	15288	same_strand	downstream	Conserved hypothetical protein.
OS_LNC0405	Os02g0435400	Os02t0435400-02	sense	intergenic	14673	same_strand	downstream	Conserved hypothetical protein.
OS_LNC0405	Os02g0435600	Os02t0435600-01	sense	intergenic	10653	same_strand	downstream	Conserved hypothetical protein.
OS_LNC0406	Os02g0437300	Os02t0437300-01	sense	genic	0	containing	exonic	Conserved hypothetical protein.
OS_LNC0407	Os02g0437300	Os02t0437300-01	sense	genic	0	containing	exonic	Conserved hypothetical protein.
OS_LNC0408	Os02g0437300	Os02t0437300-01	sense	genic	0	containing	exonic	Conserved hypothetical protein.
OS_LNC0409	Os02g0437300	Os02t0437300-01	sense	genic	0	containing	exonic	Conserved hypothetical protein.
OS_LNC0424	Os02g0484975	Os02t0484975-00	sense	intergenic	16582	same_strand	downstream	Conserved hypothetical protein.
OS_LNC0429	Os02g0519700	Os02t0519700-01	sense	intergenic	1317	same_strand	downstream	Conserved hypothetical protein.
OS_LNC0430	Os01g0117266	Os01t0117266-00	antisense	intergenic	8322	convergent	downstream	Conserved hypothetical protein.
OS_LNC0432	Os02g0536100	Os02t0536100-01	sense	genic	0	containing	exonic	Conserved hypothetical protein.
OS_LNC0446	Os02g0584900	Os02t0584900-01	sense	intergenic	2674	same_strand	downstream	Conserved hypothetical protein.
OS_LNC0448	Os02g0591000	Os02t0591000-01	sense	genic	0	containing	exonic	Conserved hypothetical protein.
OS_LNC0449	Os02g0600000	Os02t0600000-01	sense	intergenic	3305	same_strand	upstream	Conserved hypothetical protein.
OS_LNC0450	Os02g0603033	Os02t0603033-00	sense	intergenic	8286	same_strand	upstream	Conserved hypothetical protein.
OS_LNC0450	Os02g0602900	Os02t0602900-01	sense	intergenic	3869	same_strand	upstream	Conserved hypothetical protein.
OS_LNC0459	Os02g0637200	Os02t0637200-01	sense	intergenic	7555	same_strand	downstream	Conserved hypothetical protein.
OS_LNC0463	Os02g0658300	Os02t0658300-01	sense	genic	0	containing	exonic	Conserved hypothetical protein.
OS_LNC0464	Os02g0665250	Os02t0665250-01	antisense	intergenic	7747	divergent	upstream	Conserved hypothetical protein.
OS_LNC0465	Os02g0665250	Os02t0665250-01	antisense	intergenic	9921	divergent	upstream	Conserved hypothetical protein.
OS_LNC0472	Os02g0695700	Os02t0695700-01	sense	intergenic	6478	same_strand	upstream	Conserved hypothetical protein.
OS_LNC0472	Os02g0695600	Os02t0695600-01	sense	intergenic	3202	same_strand	upstream	Conserved hypothetical protein.
OS_LNC0473	Os02g0699800	Os02t0699800-01	sense	genic	0	containing	exonic	Conserved hypothetical protein.
OS_LNC0474	Os02g0699800	Os02t0699800-01	sense	genic	0	containing	exonic	Conserved hypothetical protein.
OS_LNC0476	Os02g0715300	Os02t0715300-02	sense	intergenic	1654	same_strand	downstream	Conserved hypothetical protein.
OS_LNC0476	Os02g0715400	Os02t0715400-00	sense	intergenic	172	same_strand	downstream	Conserved hypothetical protein.
OS_LNC0491	Os02g0768000	Os02t0768000-01	sense	intergenic	1118	same_strand	downstream	Conserved hypothetical protein.
OS_LNC0492	Os01g0341300	Os01t0341300-01	sense	intergenic	9463	same_strand	downstream	Conserved hypothetical protein.
OS_LNC0493	Os01g0341300	Os01t0341300-01	sense	intergenic	9505	same_strand	downstream	Conserved hypothetical protein.
OS_LNC0509	Os02g0800600	Os02t0800600-01	antisense	intergenic	7541	divergent	upstream	Conserved hypothetical protein.
OS_LNC0510	Os02g0800600	Os02t0800600-01	antisense	intergenic	7541	divergent	upstream	Conserved hypothetical protein.
OS_LNC0511	Os02g0800600	Os02t0800600-01	sense	genic	0	containing	intronic	Conserved hypothetical protein.
OS_LNC0512	Os02g0800600	Os02t0800600-01	sense	genic	0	containing	exonic	Conserved hypothetical protein.
OS_LNC0519	Os02g0807750	Os02t0807750-01	sense	intergenic	1036	same_strand	upstream	Conserved hypothetical protein.
OS_LNC0520	Os02g0807750	Os02t0807750-01	sense	intergenic	1036	same_strand	upstream	Conserved hypothetical protein.
OS_LNC0521	Os02g0807750	Os02t0807750-01	sense	intergenic	1036	same_strand	upstream	Conserved hypothetical protein.
OS_LNC0522	Os02g0807750	Os02t0807750-01	sense	intergenic	1036	same_strand	upstream	Conserved hypothetical protein.
OS_LNC0523	Os02g0813083	Os02t0813083-00	sense	genic	0	containing	exonic	Conserved hypothetical protein.
OS_LNC0524	Os02g0813083	Os02t0813083-00	sense	genic	0	containing	exonic	Conserved hypothetical protein.
OS_LNC0532	Os02g0820600	Os02t0820600-01	antisense	intergenic	155	divergent	upstream	Conserved hypothetical protein.
OS_LNC0534	Os02g0824400	Os02t0824400-01	sense	genic	0	overlapping	exonic	Conserved hypothetical protein.
OS_LNC0536	Os02g0826400	Os02t0826400-00	antisense	intergenic	5697	convergent	downstream	Conserved hypothetical protein.
OS_LNC0539	Os02g0831100	Os02t0831100-01	sense	intergenic	462	same_strand	upstream	Conserved hypothetical protein.
OS_LNC0542	Os03g0102600	Os03t0102600-01	sense	genic	0	containing	exonic	Conserved hypothetical protein.
OS_LNC0543	Os03g0102600	Os03t0102600-01	sense	genic	0	containing	exonic	Conserved hypothetical protein.
OS_LNC0550	Os03g0144000	Os03t0144000-01	antisense	intergenic	4548	divergent	upstream	Conserved hypothetical protein.
OS_LNC0551	Os03g0144000	Os03t0144000-01	antisense	intergenic	4548	divergent	upstream	Conserved hypothetical protein.
OS_LNC0552	Os03g0144000	Os03t0144000-01	antisense	intergenic	4733	divergent	upstream	Conserved hypothetical protein.
OS_LNC0555	Os03g0160000	Os03t0160000-01	sense	intergenic	102	same_strand	upstream	Conserved hypothetical protein.
OS_LNC0559	Os03g0177100	Os03t0177100-01	sense	intergenic	6593	same_strand	upstream	Conserved hypothetical protein.
OS_LNC0560	Os03g0177100	Os03t0177100-01	sense	intergenic	6593	same_strand	upstream	Conserved hypothetical protein.
OS_LNC0561	Os03g0177100	Os03t0177100-01	sense	intergenic	6593	same_strand	upstream	Conserved hypothetical protein.
OS_LNC0562	Os03g0177100	Os03t0177100-01	sense	intergenic	6593	same_strand	upstream	Conserved hypothetical protein.
OS_LNC0565	Os03g0177100	Os03t0177100-01	sense	intergenic	6859	same_strand	upstream	Conserved hypothetical protein.
OS_LNC0566	Os03g0177100	Os03t0177100-01	sense	intergenic	7121	same_strand	upstream	Conserved hypothetical protein.
OS_LNC0567	Os03g0177100	Os03t0177100-01	sense	intergenic	7121	same_strand	upstream	Conserved hypothetical protein.
OS_LNC0568	Os03g0177100	Os03t0177100-01	sense	intergenic	7121	same_strand	upstream	Conserved hypothetical protein.
OS_LNC0569	Os03g0177100	Os03t0177100-01	sense	intergenic	7121	same_strand	upstream	Conserved hypothetical protein.
OS_LNC0570	Os03g0177100	Os03t0177100-01	sense	intergenic	7121	same_strand	upstream	Conserved hypothetical protein.
OS_LNC0584	Os03g0217400	Os03t0217400-01	sense	intergenic	2680	same_strand	upstream	Conserved hypothetical protein.
OS_LNC0585	Os03g0217400	Os03t0217400-01	sense	intergenic	2823	same_strand	upstream	Conserved hypothetical protein.
OS_LNC0586	Os03g0219800	Os03t0219800-02	sense	intergenic	5483	same_strand	upstream	Conserved hypothetical protein.
OS_LNC0587	Os03g0219800	Os03t0219800-02	sense	intergenic	5398	same_strand	upstream	Conserved hypothetical protein.
OS_LNC0593	Os01g0362400	Os01t0362400-01	antisense	intergenic	5782	convergent	downstream	Conserved hypothetical protein.
OS_LNC0593	Os01g0362533	Os01t0362533-01	antisense	intergenic	4237	convergent	downstream	Conserved hypothetical protein.
OS_LNC0594	Os01g0362400	Os01t0362400-01	antisense	intergenic	5822	convergent	downstream	Conserved hypothetical protein.
OS_LNC0594	Os01g0362533	Os01t0362533-01	antisense	intergenic	4277	convergent	downstream	Conserved hypothetical protein.
OS_LNC0595	Os01g0362400	Os01t0362400-01	antisense	intergenic	5855	convergent	downstream	Conserved hypothetical protein.
OS_LNC0595	Os01g0362533	Os01t0362533-01	antisense	intergenic	4310	convergent	downstream	Conserved hypothetical protein.
OS_LNC0600	Os03g0243200	Os03t0243200-01	sense	intergenic	5497	same_strand	downstream	Conserved hypothetical protein.
OS_LNC0607	Os03g0278566	Os03t0278566-00	sense	genic	0	containing	exonic	Conserved hypothetical protein.
OS_LNC0608	Os03g0283300	Os03t0283300-01	antisense	intergenic	3712	convergent	downstream	Conserved hypothetical protein.
OS_LNC0631	Os03g0348800	Os03t0348800-02	sense	intergenic	7409	same_strand	downstream	Conserved hypothetical protein.
OS_LNC0631	Os03g0348800	Os03t0348800-01	sense	intergenic	3854	same_strand	downstream	Conserved hypothetical protein.
OS_LNC0645	Os03g0414400	Os03t0414400-01	sense	genic	0	containing	exonic	Conserved hypothetical protein.
OS_LNC0654	Os03g0431500	Os03t0431500-01	antisense	intergenic	6133	divergent	upstream	Conserved hypothetical protein.
OS_LNC0661	Os03g0558700	Os03t0558700-01	sense	intergenic	17279	same_strand	upstream	Conserved hypothetical protein.
OS_LNC0666	Os01g0393000	Os01t0393000-01	sense	genic	0	nested	exonic	Conserved hypothetical protein.
OS_LNC0666	Os01g0393000	Os01t0393000-02	sense	genic	0	containing	exonic	Conserved hypothetical protein.
OS_LNC0667	Os03g0581800	Os03t0581800-01	sense	intergenic	2345	same_strand	upstream	Conserved hypothetical protein.
OS_LNC0668	Os03g0581800	Os03t0581800-01	sense	intergenic	2376	same_strand	upstream	Conserved hypothetical protein.
OS_LNC0669	Os03g0583000	Os03t0583000-00	antisense	genic	0	containing	intronic	Conserved hypothetical protein.
OS_LNC0670	Os03g0583000	Os03t0583000-00	antisense	intergenic	13	divergent	upstream	Conserved hypothetical protein.
OS_LNC0680	Os03g0604566	Os03t0604566-01	antisense	intergenic	466	convergent	downstream	Conserved hypothetical protein.
OS_LNC0686	Os03g0614901	Os03t0614901-01	sense	genic	0	containing	exonic	Conserved hypothetical protein.
OS_LNC0689	Os03g0622500	Os03t0622500-02	sense	intergenic	2610	same_strand	upstream	Conserved hypothetical protein.
OS_LNC0689	Os03g0622500	Os03t0622500-01	sense	intergenic	2609	same_strand	upstream	Conserved hypothetical protein.
OS_LNC0689	Os03g0622600	Os03t0622600-01	sense	genic	0	containing	exonic	Conserved hypothetical protein.
OS_LNC0697	Os03g0661500	Os03t0661500-01	sense	intergenic	7771	same_strand	downstream	Conserved hypothetical protein.
OS_LNC0705	Os03g0683700	Os03t0683700-02	antisense	intergenic	6702	convergent	downstream	Conserved hypothetical protein.
OS_LNC0706	Os03g0686500	Os03t0686500-02	antisense	intergenic	1426	divergent	upstream	Conserved hypothetical protein.
OS_LNC0707	Os03g0686500	Os03t0686500-02	antisense	intergenic	1426	divergent	upstream	Conserved hypothetical protein.
OS_LNC0708	Os03g0686500	Os03t0686500-02	antisense	intergenic	1426	divergent	upstream	Conserved hypothetical protein.
OS_LNC0709	Os03g0686500	Os03t0686500-02	antisense	intergenic	1426	divergent	upstream	Conserved hypothetical protein.
OS_LNC0710	Os03g0686500	Os03t0686500-02	antisense	intergenic	1429	divergent	upstream	Conserved hypothetical protein.
OS_LNC0716	Os03g0713200	Os03t0713200-01	sense	genic	0	containing	exonic	Conserved hypothetical protein.
OS_LNC0722	Os01g0511700	Os01t0511700-01	sense	genic	0	containing	exonic	Conserved hypothetical protein.
OS_LNC0727	Os03g0751800	Os03t0751800-01	antisense	intergenic	9951	convergent	downstream	Conserved hypothetical protein.
OS_LNC0733	Os03g0776400	Os03t0776400-01	sense	intergenic	9318	same_strand	downstream	Conserved hypothetical protein.
OS_LNC0734	Os03g0785100	Os03t0785100-01	sense	intergenic	5913	same_strand	upstream	Conserved hypothetical protein.
OS_LNC0738	Os03g0801500	Os03t0801500-01	sense	genic	0	containing	exonic	Conserved hypothetical protein.
OS_LNC0739	Os03g0801500	Os03t0801500-01	sense	genic	0	containing	exonic	Conserved hypothetical protein.
OS_LNC0740	Os03g0801500	Os03t0801500-01	sense	genic	0	containing	exonic	Conserved hypothetical protein.
OS_LNC0745	Os03g0816300	Os03t0816300-01	antisense	intergenic	1847	convergent	downstream	Conserved hypothetical protein.
OS_LNC0746	Os03g0821250	Os03t0821250-00	antisense	intergenic	4129	convergent	downstream	Conserved hypothetical protein.
OS_LNC0747	Os03g0821250	Os03t0821250-00	antisense	intergenic	4129	convergent	downstream	Conserved hypothetical protein.
OS_LNC0748	Os03g0821250	Os03t0821250-00	antisense	intergenic	4211	convergent	downstream	Conserved hypothetical protein.
OS_LNC0749	Os03g0821250	Os03t0821250-00	antisense	intergenic	4259	convergent	downstream	Conserved hypothetical protein.
OS_LNC0751	Os03g0836500	Os03t0836500-01	sense	genic	0	containing	exonic	Conserved hypothetical protein.
OS_LNC0752	Os03g0842400	Os03t0842400-01	sense	intergenic	6249	same_strand	downstream	Conserved hypothetical protein.
OS_LNC0756	Os03g0846900	Os03t0846900-01	sense	intergenic	5257	same_strand	downstream	Conserved hypothetical protein.
OS_LNC0760	Os04g0115200	Os04t0115200-01	antisense	intergenic	8972	convergent	downstream	Conserved hypothetical protein.
OS_LNC0761	Os04g0115200	Os04t0115200-01	antisense	intergenic	4967	convergent	downstream	Conserved hypothetical protein.
OS_LNC0767	Os04g0142400	Os04t0142400-01	antisense	genic	0	containing	intronic	Conserved hypothetical protein.
OS_LNC0777	Os04g0165300	Os04t0165300-02	antisense	intergenic	4694	convergent	downstream	Conserved hypothetical protein.
OS_LNC0777	Os04g0165300	Os04t0165300-01	antisense	intergenic	4585	convergent	downstream	Conserved hypothetical protein.
OS_LNC0777	Os04g0165500	Os04t0165500-01	sense	genic	0	containing	exonic	Conserved hypothetical protein.
OS_LNC0788	Os01g0538000	Os01t0538000-01	sense	intergenic	5535	same_strand	downstream	Conserved hypothetical protein.
OS_LNC0788	Os01g0538000	Os01t0538000-03	sense	intergenic	5535	same_strand	downstream	Conserved hypothetical protein.
OS_LNC0788	Os01g0538000	Os01t0538000-04	sense	intergenic	5533	same_strand	downstream	Conserved hypothetical protein.
OS_LNC0797	Os04g0221000	Os04t0221000-01	sense	genic	0	nested	exonic	Conserved hypothetical protein.
OS_LNC0799	Os04g0226340	Os04t0226340-00	antisense	intergenic	5657	divergent	upstream	Conserved hypothetical protein.
OS_LNC0811	Os04g0254300	Os04t0254300-01	antisense	genic	0	nested	exonic	Conserved hypothetical protein.
OS_LNC0812	Os04g0259200	Os04t0259200-01	sense	genic	0	containing	exonic	Conserved hypothetical protein.
OS_LNC0821	Os04g0286400	Os04t0286400-01	sense	genic	0	containing	exonic	Conserved hypothetical protein.
OS_LNC0823	Os04g0290400	Os04t0290400-01	sense	intergenic	1886	same_strand	downstream	Conserved hypothetical protein.
OS_LNC0848	Os04g0376200	Os04t0376200-00	antisense	intergenic	3630	divergent	upstream	Conserved hypothetical protein.
OS_LNC0851	Os01g0552500	Os01t0552500-01	sense	intergenic	9596	same_strand	downstream	Conserved hypothetical protein.
OS_LNC0868	Os04g0431000	Os04t0431000-01	sense	intergenic	1293	same_strand	upstream	Conserved hypothetical protein.
OS_LNC0871	Os04g0443700	Os04t0443700-01	antisense	intergenic	1404	convergent	downstream	Conserved hypothetical protein.
OS_LNC0880	Os04g0503200	Os04t0503200-01	sense	genic	0	overlapping	exonic	Conserved hypothetical protein.
OS_LNC0902	Os04g0564300	Os04t0564300-01	sense	genic	0	containing	exonic	Conserved hypothetical protein.
OS_LNC0904	Os04g0577337	Os04t0577337-00	sense	intergenic	4266	same_strand	downstream	Conserved hypothetical protein.
OS_LNC0912	Os04g0604250	Os04t0604250-01	sense	genic	0	containing	exonic	Conserved hypothetical protein.
OS_LNC0913	Os04g0604250	Os04t0604250-01	sense	genic	0	containing	exonic	Conserved hypothetical protein.
OS_LNC0934	Os01g0584300	Os01t0584300-01	sense	intergenic	892	same_strand	downstream	Conserved hypothetical protein.
OS_LNC0938	Os05g0105800	Os05t0105800-01	sense	genic	0	containing	exonic	Conserved hypothetical protein.
OS_LNC0939	Os05g0105800	Os05t0105800-01	sense	genic	0	containing	exonic	Conserved hypothetical protein.
OS_LNC0940	Os05g0116500	Os05t0116500-01	sense	intergenic	7335	same_strand	downstream	Conserved hypothetical protein.
OS_LNC0945	Os05g0126700	Os05t0126700-01	sense	intergenic	1679	same_strand	downstream	Conserved hypothetical protein.
OS_LNC0949	Os05g0137600	Os05t0137600-01	antisense	intergenic	9006	convergent	downstream	Conserved hypothetical protein.
OS_LNC0962	Os05g0156200	Os05t0156200-01	sense	intergenic	3129	same_strand	upstream	Conserved hypothetical protein.
OS_LNC0965	Os05g0181700	Os05t0181700-01	antisense	intergenic	410	divergent	upstream	Conserved hypothetical protein.
OS_LNC0988	Os05g0267900	Os05t0267900-01	sense	genic	0	containing	exonic	Conserved hypothetical protein.
OS_LNC1025	Os05g0380400	Os05t0380400-01	sense	genic	0	containing	exonic	Conserved hypothetical protein.
OS_LNC1026	Os05g0380400	Os05t0380400-01	sense	genic	0	containing	exonic	Conserved hypothetical protein.
OS_LNC1028	Os05g0397300	Os05t0397300-02	antisense	intergenic	5158	divergent	upstream	Conserved hypothetical protein.
OS_LNC1028	Os05g0397300	Os05t0397300-03	antisense	intergenic	5158	divergent	upstream	Conserved hypothetical protein.
OS_LNC1029	Os05g0397300	Os05t0397300-02	antisense	intergenic	5158	divergent	upstream	Conserved hypothetical protein.
OS_LNC1029	Os05g0397300	Os05t0397300-03	antisense	intergenic	5158	divergent	upstream	Conserved hypothetical protein.
OS_LNC1033	Os01g0614400	Os01t0614400-01	sense	genic	0	containing	exonic	Conserved hypothetical protein.
OS_LNC1034	Os01g0614400	Os01t0614400-01	sense	genic	0	containing	exonic	Conserved hypothetical protein.
OS_LNC1037	Os05g0420900	Os05t0420900-01	sense	intergenic	1062	same_strand	downstream	Conserved hypothetical protein.
OS_LNC1038	Os05g0420900	Os05t0420900-01	sense	intergenic	7868	same_strand	upstream	Conserved hypothetical protein.
OS_LNC1039	Os05g0420900	Os05t0420900-01	sense	intergenic	8768	same_strand	upstream	Conserved hypothetical protein.
OS_LNC1040	Os05g0423200	Os05t0423200-01	sense	intergenic	2512	same_strand	upstream	Conserved hypothetical protein.
OS_LNC1043	Os05g0448700	Os05t0448700-01	antisense	intergenic	1376	convergent	downstream	Conserved hypothetical protein.
OS_LNC1043	Os05g0448675	Os05t0448675-00	antisense	genic	0	nested	exonic	Conserved hypothetical protein.
OS_LNC1044	Os05g0448700	Os05t0448700-01	antisense	intergenic	1528	convergent	downstream	Conserved hypothetical protein.
OS_LNC1044	Os05g0448675	Os05t0448675-00	antisense	genic	0	nested	exonic	Conserved hypothetical protein.
OS_LNC1045	Os05g0448700	Os05t0448700-01	antisense	intergenic	2070	convergent	downstream	Conserved hypothetical protein.
OS_LNC1045	Os05g0448675	Os05t0448675-00	antisense	genic	0	nested	exonic	Conserved hypothetical protein.
OS_LNC1046	Os05g0448700	Os05t0448700-01	antisense	intergenic	2610	convergent	downstream	Conserved hypothetical protein.
OS_LNC1046	Os05g0448675	Os05t0448675-00	antisense	genic	0	nested	intronic	Conserved hypothetical protein.
OS_LNC1055	Os05g0481600	Os05t0481600-01	antisense	intergenic	8583	divergent	upstream	Conserved hypothetical protein.
OS_LNC1057	Os05g0487300	Os05t0487300-01	antisense	intergenic	8619	convergent	downstream	Conserved hypothetical protein.
OS_LNC1057	Os05g0487300	Os05t0487300-02	antisense	intergenic	8619	convergent	downstream	Conserved hypothetical protein.
OS_LNC1057	Os05g0488100	Os05t0488100-01	sense	intergenic	6323	same_strand	downstream	Conserved hypothetical protein.
OS_LNC1058	Os05g0487300	Os05t0487300-02	antisense	intergenic	8711	convergent	downstream	Conserved hypothetical protein.
OS_LNC1058	Os05g0487300	Os05t0487300-01	antisense	intergenic	8711	convergent	downstream	Conserved hypothetical protein.
OS_LNC1058	Os05g0488100	Os05t0488100-01	sense	intergenic	6323	same_strand	downstream	Conserved hypothetical protein.
OS_LNC1064	Os05g0498500	Os05t0498500-01	antisense	intergenic	6051	convergent	downstream	Conserved hypothetical protein.
OS_LNC1065	Os05g0498800	Os05t0498800-02	sense	intergenic	241	same_strand	downstream	Conserved hypothetical protein.
OS_LNC1072	Os05g0535700	Os05t0535700-02	sense	intergenic	7284	same_strand	downstream	Conserved hypothetical protein.
OS_LNC1072	Os05g0535700	Os05t0535700-01	sense	intergenic	7277	same_strand	downstream	Conserved hypothetical protein.
OS_LNC1077	Os05g0552000	Os05t0552000-00	antisense	intergenic	3852	convergent	downstream	Conserved hypothetical protein.
OS_LNC1081	Os05g0559800	Os05t0559800-00	sense	intergenic	2696	same_strand	upstream	Conserved hypothetical protein.
OS_LNC1082	Os05g0580600	Os05t0580600-01	antisense	intergenic	9402	divergent	upstream	Conserved hypothetical protein.
OS_LNC1082	Os05g0580900	Os05t0580900-02	antisense	intergenic	312	divergent	upstream	Conserved hypothetical protein.
OS_LNC1083	Os05g0580900	Os05t0580900-02	antisense	intergenic	3721	divergent	upstream	Conserved hypothetical protein.
OS_LNC1087	Os05g0591550	Os05t0591550-00	sense	intergenic	1304	same_strand	upstream	Conserved hypothetical protein.
OS_LNC1094	Os06g0105900	Os06t0105900-02	antisense	intergenic	6008	convergent	downstream	Conserved hypothetical protein.
OS_LNC1094	Os06g0105900	Os06t0105900-01	antisense	intergenic	5888	convergent	downstream	Conserved hypothetical protein.
OS_LNC1094	Os06g0106500	Os06t0106500-01	antisense	intergenic	1982	divergent	upstream	Conserved hypothetical protein.
OS_LNC1103	Os06g0139000	Os06t0139000-01	sense	intergenic	8671	same_strand	upstream	Conserved hypothetical protein.
OS_LNC1113	Os06g0150400	Os06t0150400-01	antisense	intergenic	5278	convergent	downstream	Conserved hypothetical protein.
OS_LNC1113	Os06g0150100	Os06t0150100-01	antisense	intergenic	390	convergent	downstream	Conserved hypothetical protein.
OS_LNC1124	Os06g0184600	Os06t0184600-01	sense	genic	0	containing	exonic	Conserved hypothetical protein.
OS_LNC1126	Os06g0188550	Os06t0188550-01	sense	intergenic	842	same_strand	downstream	Conserved hypothetical protein.
OS_LNC1127	Os06g0188550	Os06t0188550-01	sense	intergenic	843	same_strand	downstream	Conserved hypothetical protein.
OS_LNC1128	Os06g0188550	Os06t0188550-01	sense	intergenic	849	same_strand	downstream	Conserved hypothetical protein.
OS_LNC1129	Os06g0188550	Os06t0188550-01	sense	intergenic	849	same_strand	downstream	Conserved hypothetical protein.
OS_LNC1130	Os06g0188550	Os06t0188550-01	sense	intergenic	849	same_strand	downstream	Conserved hypothetical protein.
OS_LNC1131	Os06g0188550	Os06t0188550-01	sense	intergenic	849	same_strand	downstream	Conserved hypothetical protein.
OS_LNC1132	Os06g0188550	Os06t0188550-01	sense	intergenic	849	same_strand	downstream	Conserved hypothetical protein.
OS_LNC1133	Os06g0188550	Os06t0188550-01	sense	intergenic	842	same_strand	downstream	Conserved hypothetical protein.
OS_LNC1134	Os06g0188550	Os06t0188550-01	sense	intergenic	842	same_strand	downstream	Conserved hypothetical protein.
OS_LNC1135	Os06g0188550	Os06t0188550-01	sense	intergenic	842	same_strand	downstream	Conserved hypothetical protein.
OS_LNC1136	Os06g0188550	Os06t0188550-01	sense	intergenic	842	same_strand	downstream	Conserved hypothetical protein.
OS_LNC1137	Os06g0188550	Os06t0188550-01	sense	intergenic	1360	same_strand	downstream	Conserved hypothetical protein.
OS_LNC1138	Os06g0202800	Os06t0202800-01	sense	intergenic	1673	same_strand	downstream	Conserved hypothetical protein.
OS_LNC1138	Os06g0202700	Os06t0202700-01	antisense	intergenic	866	convergent	downstream	Conserved hypothetical protein.
OS_LNC1139	Os06g0204600	Os06t0204600-00	sense	intergenic	1688	same_strand	upstream	Conserved hypothetical protein.
OS_LNC1145	Os06g0239200	Os06t0239200-00	sense	genic	0	containing	exonic	Conserved hypothetical protein.
OS_LNC1146	Os06g0240400	Os06t0240400-01	sense	genic	0	containing	exonic	Conserved hypothetical protein.
OS_LNC1147	Os06g0241200	Os06t0241200-01	sense	intergenic	2042	same_strand	downstream	Conserved hypothetical protein.
OS_LNC1153	Os06g0267200	Os06t0267200-01	sense	intergenic	5772	same_strand	upstream	Conserved hypothetical protein.
OS_LNC1158	Os06g0291800	Os06t0291800-00	sense	intergenic	1235	same_strand	downstream	Conserved hypothetical protein.
OS_LNC1159	Os06g0296100	Os06t0296100-00	antisense	intergenic	604	divergent	upstream	Conserved hypothetical protein.
OS_LNC1182	Os06g0329350	Os06t0329350-01	sense	intergenic	9212	same_strand	downstream	Conserved hypothetical protein.
OS_LNC1182	Os06g0329200	Os06t0329200-02	sense	intergenic	6237	same_strand	upstream	Conserved hypothetical protein.
OS_LNC1182	Os06g0329300	Os06t0329300-01	antisense	intergenic	2140	divergent	upstream	Conserved hypothetical protein.
OS_LNC1183	Os06g0329300	Os06t0329300-01	antisense	genic	0	containing	exonic	Conserved hypothetical protein.
OS_LNC1183	Os06g0329350	Os06t0329350-01	sense	genic	0	containing	exonic	Conserved hypothetical protein.
OS_LNC1184	Os06g0329300	Os06t0329300-01	antisense	intergenic	1744	convergent	downstream	Conserved hypothetical protein.
OS_LNC1184	Os06g0329350	Os06t0329350-01	sense	genic	0	containing	exonic	Conserved hypothetical protein.
OS_LNC1201	Os01g0656600	Os01t0656600-01	sense	intergenic	1985	same_strand	upstream	Conserved hypothetical protein.
OS_LNC1215	Os06g0487620	Os06t0487620-01	antisense	intergenic	979	divergent	upstream	Conserved hypothetical protein.
OS_LNC1223	Os06g0498000	Os06t0498000-00	antisense	intergenic	3845	divergent	upstream	Conserved hypothetical protein.
OS_LNC1238	Os06g0579100	Os06t0579100-01	sense	intergenic	3352	same_strand	upstream	Conserved hypothetical protein.
OS_LNC1239	Os06g0579100	Os06t0579100-01	sense	genic	0	containing	exonic	Conserved hypothetical protein.
OS_LNC1240	Os06g0581701	Os06t0581701-01	sense	intergenic	12250	same_strand	downstream	Conserved hypothetical protein.
OS_LNC1255	Os06g0656700	Os06t0656700-01	sense	intergenic	8684	same_strand	upstream	Conserved hypothetical protein.
OS_LNC1258	Os06g0667400	Os06t0667400-02	antisense	intergenic	182	divergent	upstream	Conserved hypothetical protein.
OS_LNC1258	Os06g0667400	Os06t0667400-01	antisense	intergenic	155	divergent	upstream	Conserved hypothetical protein.
OS_LNC1259	Os06g0673800	Os06t0673800-01	antisense	intergenic	7426	divergent	upstream	Conserved hypothetical protein.
OS_LNC1259	Os06g0674100	Os06t0674100-01	antisense	intergenic	4154	convergent	downstream	Conserved hypothetical protein.
OS_LNC1260	Os06g0682300	Os06t0682300-01	antisense	genic	0	containing	intronic	Conserved hypothetical protein.
OS_LNC1261	Os06g0682300	Os06t0682300-01	antisense	genic	0	containing	intronic	Conserved hypothetical protein.
OS_LNC1263	Os06g0694400	Os06t0694400-01	antisense	genic	0	nested	exonic	Conserved hypothetical protein.
OS_LNC1263	Os06g0694400	Os06t0694400-02	antisense	genic	0	nested	exonic	Conserved hypothetical protein.
OS_LNC1264	Os06g0694400	Os06t0694400-02	antisense	intergenic	207	divergent	upstream	Conserved hypothetical protein.
OS_LNC1264	Os06g0694400	Os06t0694400-01	antisense	genic	0	overlapping	exonic	Conserved hypothetical protein.
OS_LNC1265	Os06g0694400	Os06t0694400-02	antisense	intergenic	210	divergent	upstream	Conserved hypothetical protein.
OS_LNC1265	Os06g0694400	Os06t0694400-01	antisense	genic	0	overlapping	exonic	Conserved hypothetical protein.
OS_LNC1266	Os06g0694400	Os06t0694400-02	antisense	intergenic	210	divergent	upstream	Conserved hypothetical protein.
OS_LNC1266	Os06g0694400	Os06t0694400-01	antisense	genic	0	overlapping	exonic	Conserved hypothetical protein.
OS_LNC1267	Os06g0694400	Os06t0694400-02	antisense	intergenic	210	divergent	upstream	Conserved hypothetical protein.
OS_LNC1267	Os06g0694400	Os06t0694400-01	antisense	genic	0	overlapping	exonic	Conserved hypothetical protein.
OS_LNC1268	Os06g0694400	Os06t0694400-02	antisense	intergenic	213	divergent	upstream	Conserved hypothetical protein.
OS_LNC1268	Os06g0694400	Os06t0694400-01	antisense	intergenic	3	divergent	upstream	Conserved hypothetical protein.
OS_LNC1275	Os06g0720000	Os06t0720000-03	sense	intergenic	7385	same_strand	upstream	Conserved hypothetical protein.
OS_LNC1275	Os06g0720000	Os06t0720000-02	sense	intergenic	7355	same_strand	upstream	Conserved hypothetical protein.
OS_LNC1276	Os06g0720000	Os06t0720000-03	sense	intergenic	6422	same_strand	upstream	Conserved hypothetical protein.
OS_LNC1276	Os06g0720000	Os06t0720000-02	sense	intergenic	6392	same_strand	upstream	Conserved hypothetical protein.
OS_LNC1277	Os06g0720000	Os06t0720000-03	sense	intergenic	5279	same_strand	upstream	Conserved hypothetical protein.
OS_LNC1277	Os06g0720000	Os06t0720000-02	sense	intergenic	5249	same_strand	upstream	Conserved hypothetical protein.
OS_LNC1278	Os06g0720000	Os06t0720000-03	sense	intergenic	3049	same_strand	downstream	Conserved hypothetical protein.
OS_LNC1278	Os06g0720000	Os06t0720000-02	sense	intergenic	2970	same_strand	downstream	Conserved hypothetical protein.
OS_LNC1279	Os06g0720000	Os06t0720000-02	antisense	genic	0	overlapping	exonic	Conserved hypothetical protein.
OS_LNC1279	Os06g0720000	Os06t0720000-03	antisense	genic	0	overlapping	exonic	Conserved hypothetical protein.
OS_LNC1280	Os06g0720000	Os06t0720000-03	antisense	genic	0	overlapping	exonic	Conserved hypothetical protein.
OS_LNC1280	Os06g0720000	Os06t0720000-02	antisense	genic	0	overlapping	exonic	Conserved hypothetical protein.
OS_LNC1285	Os06g0731950	Os06t0731950-01	sense	genic	0	containing	exonic	Conserved hypothetical protein.
OS_LNC1286	Os06g0731950	Os06t0731950-01	sense	genic	0	containing	exonic	Conserved hypothetical protein.
OS_LNC1287	Os07g0101300	Os07t0101300-01	antisense	intergenic	8344	divergent	upstream	Conserved hypothetical protein.
OS_LNC1287	Os07g0101101	Os07t0101101-01	sense	genic	0	containing	exonic	Conserved hypothetical protein.
OS_LNC1288	Os07g0101300	Os07t0101300-01	antisense	intergenic	8344	divergent	upstream	Conserved hypothetical protein.
OS_LNC1288	Os07g0101101	Os07t0101101-01	sense	genic	0	containing	exonic	Conserved hypothetical protein.
OS_LNC1290	Os07g0137600	Os07t0137600-01	antisense	intergenic	403	divergent	upstream	Conserved hypothetical protein.
OS_LNC1294	Os07g0159200	Os07t0159200-01	sense	genic	0	containing	exonic	Conserved hypothetical protein.
OS_LNC1301	Os07g0181200	Os07t0181200-00	sense	genic	0	containing	exonic	Conserved hypothetical protein.
OS_LNC1302	Os07g0184500	Os07t0184500-01	antisense	intergenic	4789	divergent	upstream	Conserved hypothetical protein.
OS_LNC1307	Os01g0690600	Os01t0690600-01	antisense	intergenic	9794	divergent	upstream	Conserved hypothetical protein.
OS_LNC1309	Os01g0690900	Os01t0690900-00	sense	intergenic	2807	same_strand	downstream	Conserved hypothetical protein.
OS_LNC1315	Os07g0213400	Os07t0213400-01	antisense	intergenic	352	convergent	downstream	Conserved hypothetical protein.
OS_LNC1317	Os07g0230400	Os07t0230400-01	sense	intergenic	376	same_strand	upstream	Conserved hypothetical protein.
OS_LNC1318	Os07g0230400	Os07t0230400-01	sense	intergenic	3985	same_strand	upstream	Conserved hypothetical protein.
OS_LNC1323	Os07g0255300	Os07t0255300-01	antisense	intergenic	25932	divergent	upstream	Conserved hypothetical protein.
OS_LNC1324	Os07g0255300	Os07t0255300-01	antisense	intergenic	2056	divergent	upstream	Conserved hypothetical protein.
OS_LNC1325	Os07g0255300	Os07t0255300-01	antisense	intergenic	2172	divergent	upstream	Conserved hypothetical protein.
OS_LNC1329	Os07g0265100	Os07t0265100-01	sense	genic	0	containing	exonic	Conserved hypothetical protein.
OS_LNC1334	Os07g0289600	Os07t0289600-01	antisense	intergenic	8861	divergent	upstream	Conserved hypothetical protein.
OS_LNC1343	Os07g0418200	Os07t0418200-01	antisense	intergenic	1626	divergent	upstream	Conserved hypothetical protein.
OS_LNC1344	Os07g0418200	Os07t0418200-01	antisense	intergenic	1651	divergent	upstream	Conserved hypothetical protein.
OS_LNC1361	Os07g0475000	Os07t0475000-01	sense	genic	0	containing	exonic	Conserved hypothetical protein.
OS_LNC1362	Os07g0475000	Os07t0475000-01	sense	genic	0	overlapping	exonic	Conserved hypothetical protein.
OS_LNC1367	Os01g0144700	Os01t0144700-01	sense	genic	0	containing	exonic	Conserved hypothetical protein.
OS_LNC1374	Os07g0530700	Os07t0530700-01	sense	genic	0	containing	exonic	Conserved hypothetical protein.
OS_LNC1383	Os07g0546100	Os07t0546100-02	antisense	intergenic	320	convergent	downstream	Conserved hypothetical protein.
OS_LNC1383	Os07g0546100	Os07t0546100-01	antisense	intergenic	260	convergent	downstream	Conserved hypothetical protein.
OS_LNC1383	Os07g0546200	Os07t0546200-01	sense	genic	0	containing	exonic	Conserved hypothetical protein.
OS_LNC1392	Os07g0579100	Os07t0579100-01	sense	intergenic	3409	same_strand	downstream	Conserved hypothetical protein.
OS_LNC1392	Os07g0579000	Os07t0579000-01	antisense	intergenic	591	convergent	downstream	Conserved hypothetical protein.
OS_LNC1393	Os07g0579100	Os07t0579100-01	sense	intergenic	3440	same_strand	downstream	Conserved hypothetical protein.
OS_LNC1393	Os07g0579000	Os07t0579000-01	antisense	intergenic	871	convergent	downstream	Conserved hypothetical protein.
OS_LNC1394	Os07g0579100	Os07t0579100-01	sense	intergenic	3409	same_strand	downstream	Conserved hypothetical protein.
OS_LNC1394	Os07g0579000	Os07t0579000-01	antisense	intergenic	1168	convergent	downstream	Conserved hypothetical protein.
OS_LNC1395	Os07g0579000	Os07t0579000-01	antisense	intergenic	3348	convergent	downstream	Conserved hypothetical protein.
OS_LNC1395	Os07g0579100	Os07t0579100-01	sense	intergenic	552	same_strand	downstream	Conserved hypothetical protein.
OS_LNC1401	Os07g0597400	Os07t0597400-01	sense	genic	0	containing	exonic	Conserved hypothetical protein.
OS_LNC1406	Os07g0618700	Os07t0618700-01	sense	genic	0	containing	exonic	Conserved hypothetical protein.
OS_LNC1408	Os07g0631300	Os07t0631300-01	sense	genic	0	containing	exonic	Conserved hypothetical protein.
OS_LNC1417	Os07g0656300	Os07t0656300-00	antisense	intergenic	6112	divergent	upstream	Conserved hypothetical protein.
OS_LNC1418	Os07g0659300	Os07t0659300-01	antisense	intergenic	3068	divergent	upstream	Conserved hypothetical protein.
OS_LNC1418	Os07g0659100	Os07t0659100-01	sense	genic	0	containing	exonic	Conserved hypothetical protein.
OS_LNC1420	Os07g0661400	Os07t0661400-01	antisense	intergenic	5737	convergent	downstream	Conserved hypothetical protein.
OS_LNC1430	Os07g0684700	Os07t0684700-01	sense	intergenic	5216	same_strand	downstream	Conserved hypothetical protein.
OS_LNC1431	Os07g0684700	Os07t0684700-01	sense	intergenic	5216	same_strand	downstream	Conserved hypothetical protein.
OS_LNC1435	Os08g0100150	Os08t0100150-01	sense	genic	0	overlapping	exonic	Conserved hypothetical protein.
OS_LNC1436	Os08g0100150	Os08t0100150-01	sense	intergenic	3999	same_strand	downstream	Conserved hypothetical protein.
OS_LNC1445	Os08g0123300	Os08t0123300-01	sense	genic	0	containing	exonic	Conserved hypothetical protein.
OS_LNC1446	Os01g0728200	Os01t0728200-01	antisense	intergenic	6588	convergent	downstream	Conserved hypothetical protein.
OS_LNC1446	Os01g0727900	Os01t0727900-01	sense	genic	0	containing	exonic	Conserved hypothetical protein.
OS_LNC1450	Os08g0132600	Os08t0132600-02	antisense	intergenic	928	convergent	downstream	Conserved hypothetical protein.
OS_LNC1450	Os08g0132600	Os08t0132600-01	antisense	intergenic	764	convergent	downstream	Conserved hypothetical protein.
OS_LNC1451	Os08g0133600	Os08t0133600-01	sense	intergenic	4840	same_strand	downstream	Conserved hypothetical protein.
OS_LNC1452	Os08g0133600	Os08t0133600-01	sense	intergenic	4840	same_strand	downstream	Conserved hypothetical protein.
OS_LNC1453	Os08g0133600	Os08t0133600-01	sense	intergenic	4840	same_strand	downstream	Conserved hypothetical protein.
OS_LNC1454	Os08g0133600	Os08t0133600-01	sense	intergenic	4840	same_strand	downstream	Conserved hypothetical protein.
OS_LNC1455	Os08g0135300	Os08t0135300-01	sense	intergenic	3604	same_strand	upstream	Conserved hypothetical protein.
OS_LNC1456	Os08g0138900	Os08t0138900-01	antisense	intergenic	7249	divergent	upstream	Conserved hypothetical protein.
OS_LNC1457	Os01g0728400	Os01t0728400-01	sense	genic	0	containing	exonic	Conserved hypothetical protein.
OS_LNC1458	Os01g0728400	Os01t0728400-01	sense	genic	0	containing	exonic	Conserved hypothetical protein.
OS_LNC1459	Os01g0728400	Os01t0728400-01	sense	genic	0	containing	exonic	Conserved hypothetical protein.
OS_LNC1460	Os01g0728400	Os01t0728400-01	sense	genic	0	containing	exonic	Conserved hypothetical protein.
OS_LNC1461	Os01g0728400	Os01t0728400-01	sense	genic	0	containing	exonic	Conserved hypothetical protein.
OS_LNC1462	Os01g0728400	Os01t0728400-01	sense	genic	0	containing	exonic	Conserved hypothetical protein.
OS_LNC1479	Os08g0173300	Os08t0173300-01	sense	intergenic	5959	same_strand	downstream	Conserved hypothetical protein.
OS_LNC1480	Os08g0177550	Os08t0177550-01	antisense	intergenic	3983	divergent	upstream	Conserved hypothetical protein.
OS_LNC1481	Os08g0177550	Os08t0177550-01	antisense	intergenic	197	divergent	upstream	Conserved hypothetical protein.
OS_LNC1484	Os08g0184600	Os08t0184600-02	sense	intergenic	9559	same_strand	downstream	Conserved hypothetical protein.
OS_LNC1484	Os08g0184600	Os08t0184600-03	sense	intergenic	9508	same_strand	downstream	Conserved hypothetical protein.
OS_LNC1485	Os08g0185900	Os08t0185900-01	antisense	intergenic	4913	convergent	downstream	Conserved hypothetical protein.
OS_LNC1498	Os08g0234200	Os08t0234200-01	sense	intergenic	9963	same_strand	upstream	Conserved hypothetical protein.
OS_LNC1498	Os08g0234700	Os08t0234700-01	sense	genic	0	containing	exonic	Conserved hypothetical protein.
OS_LNC1499	Os08g0246800	Os08t0246800-01	sense	intergenic	861	same_strand	downstream	Conserved hypothetical protein.
OS_LNC1499	Os08g0246800	Os08t0246800-02	sense	intergenic	798	same_strand	downstream	Conserved hypothetical protein.
OS_LNC1507	Os01g0738000	Os01t0738000-01	antisense	intergenic	527	convergent	downstream	Conserved hypothetical protein.
OS_LNC1529	Os08g0332150	Os08t0332150-00	antisense	intergenic	7634	divergent	upstream	Conserved hypothetical protein.
OS_LNC1529	Os08g0332100	Os08t0332100-01	sense	intergenic	6194	same_strand	downstream	Conserved hypothetical protein.
OS_LNC1530	Os08g0332150	Os08t0332150-00	antisense	intergenic	9216	convergent	downstream	Conserved hypothetical protein.
OS_LNC1530	Os08g0332100	Os08t0332100-01	sense	intergenic	7018	same_strand	upstream	Conserved hypothetical protein.
OS_LNC1531	Os08g0332150	Os08t0332150-00	antisense	intergenic	9250	convergent	downstream	Conserved hypothetical protein.
OS_LNC1531	Os08g0332100	Os08t0332100-01	sense	intergenic	7052	same_strand	upstream	Conserved hypothetical protein.
OS_LNC1538	Os08g0351300	Os08t0351300-01	sense	genic	0	containing	exonic	Conserved hypothetical protein.
OS_LNC1539	Os08g0351300	Os08t0351300-01	sense	intergenic	22158	same_strand	upstream	Conserved hypothetical protein.
OS_LNC1547	Os08g0389700	Os08t0389700-02	antisense	genic	0	overlapping	exonic	Conserved hypothetical protein.
OS_LNC1548	Os08g0389700	Os08t0389700-02	antisense	genic	0	overlapping	exonic	Conserved hypothetical protein.
OS_LNC1549	Os08g0389700	Os08t0389700-02	antisense	intergenic	7805	convergent	downstream	Conserved hypothetical protein.
OS_LNC1550	Os08g0400300	Os08t0400300-01	sense	intergenic	2035	same_strand	upstream	Conserved hypothetical protein.
OS_LNC1555	Os08g0408300	Os08t0408300-02	antisense	intergenic	8419	convergent	downstream	Conserved hypothetical protein.
OS_LNC1556	Os08g0422300	Os08t0422300-01	sense	genic	0	containing	exonic	Conserved hypothetical protein.
OS_LNC1557	Os08g0422800	Os08t0422800-00	sense	genic	0	containing	exonic	Conserved hypothetical protein.
OS_LNC1558	Os08g0422800	Os08t0422800-00	sense	genic	0	containing	exonic	Conserved hypothetical protein.
OS_LNC1567	Os08g0448900	Os08t0448900-00	sense	genic	0	containing	exonic	Conserved hypothetical protein.
OS_LNC1568	Os08g0448900	Os08t0448900-00	sense	genic	0	overlapping	exonic	Conserved hypothetical protein.
OS_LNC1569	Os08g0449500	Os08t0449500-02	sense	genic	0	containing	exonic	Conserved hypothetical protein.
OS_LNC1570	Os08g0449500	Os08t0449500-02	sense	genic	0	containing	exonic	Conserved hypothetical protein.
OS_LNC1571	Os08g0449500	Os08t0449500-02	sense	genic	0	containing	exonic	Conserved hypothetical protein.
OS_LNC1573	Os01g0754000	Os01t0754000-01	sense	genic	0	containing	exonic	Conserved hypothetical protein.
OS_LNC1574	Os01g0754000	Os01t0754000-01	sense	genic	0	containing	exonic	Conserved hypothetical protein.
OS_LNC1575	Os01g0754000	Os01t0754000-01	sense	genic	0	containing	exonic	Conserved hypothetical protein.
OS_LNC1576	Os01g0754000	Os01t0754000-01	sense	genic	0	containing	exonic	Conserved hypothetical protein.
OS_LNC1577	Os08g0474800	Os08t0474800-01	antisense	intergenic	6146	convergent	downstream	Conserved hypothetical protein.
OS_LNC1578	Os08g0484300	Os08t0484300-00	antisense	genic	0	overlapping	exonic	Conserved hypothetical protein.
OS_LNC1579	Os08g0484300	Os08t0484300-00	antisense	genic	0	overlapping	exonic	Conserved hypothetical protein.
OS_LNC1588	Os08g0516000	Os08t0516000-01	sense	intergenic	5119	same_strand	downstream	Conserved hypothetical protein.
OS_LNC1589	Os08g0516000	Os08t0516000-01	sense	intergenic	5817	same_strand	downstream	Conserved hypothetical protein.
OS_LNC1595	Os08g0524501	Os08t0524501-00	antisense	genic	0	containing	exonic	Conserved hypothetical protein.
OS_LNC1602	Os08g0540900	Os08t0540900-01	sense	intergenic	7338	same_strand	downstream	Conserved hypothetical protein.
OS_LNC1603	Os08g0540900	Os08t0540900-01	sense	intergenic	7776	same_strand	downstream	Conserved hypothetical protein.
OS_LNC1621	Os09g0129400	Os09t0129400-02	sense	intergenic	4848	same_strand	upstream	Conserved hypothetical protein.
OS_LNC1622	Os09g0129400	Os09t0129400-02	sense	intergenic	4848	same_strand	upstream	Conserved hypothetical protein.
OS_LNC1665	Os09g0346400	Os09t0346400-02	antisense	intergenic	1718	convergent	downstream	Conserved hypothetical protein.
OS_LNC1665	Os09g0346400	Os09t0346400-01	antisense	intergenic	1699	convergent	downstream	Conserved hypothetical protein.
OS_LNC1666	Os09g0346400	Os09t0346400-02	antisense	intergenic	1994	convergent	downstream	Conserved hypothetical protein.
OS_LNC1666	Os09g0346400	Os09t0346400-01	antisense	intergenic	1975	convergent	downstream	Conserved hypothetical protein.
OS_LNC1667	Os09g0346400	Os09t0346400-02	antisense	intergenic	2016	convergent	downstream	Conserved hypothetical protein.
OS_LNC1667	Os09g0346400	Os09t0346400-01	antisense	intergenic	1997	convergent	downstream	Conserved hypothetical protein.
OS_LNC1668	Os01g0777600	Os01t0777600-01	antisense	genic	0	overlapping	exonic	Conserved hypothetical protein.
OS_LNC1668	Os01g0777400	Os01t0777400-01	antisense	genic	0	containing	intronic	Conserved hypothetical protein.
OS_LNC1671	Os09g0363700	Os09t0363700-01	antisense	intergenic	8855	divergent	upstream	Conserved hypothetical protein.
OS_LNC1674	Os09g0380450	Os09t0380450-01	sense	intergenic	7972	same_strand	downstream	Conserved hypothetical protein.
OS_LNC1675	Os09g0382400	Os09t0382400-01	sense	intergenic	15062	same_strand	upstream	Conserved hypothetical protein.
OS_LNC1675	Os09g0382500	Os09t0382500-01	sense	intergenic	11889	same_strand	upstream	Conserved hypothetical protein.
OS_LNC1676	Os09g0387150	Os09t0387150-01	sense	intergenic	4295	same_strand	upstream	Conserved hypothetical protein.
OS_LNC1688	Os09g0436600	Os09t0436600-02	sense	intergenic	908	same_strand	upstream	Conserved hypothetical protein.
OS_LNC1688	Os09g0436500	Os09t0436500-03	sense	genic	0	containing	exonic	Conserved hypothetical protein.
OS_LNC1689	Os09g0436600	Os09t0436600-02	sense	intergenic	908	same_strand	upstream	Conserved hypothetical protein.
OS_LNC1689	Os09g0436500	Os09t0436500-03	sense	genic	0	containing	exonic	Conserved hypothetical protein.
OS_LNC1690	Os09g0450700	Os09t0450700-01	sense	genic	0	containing	exonic	Conserved hypothetical protein.
OS_LNC1691	Os09g0450700	Os09t0450700-01	sense	genic	0	containing	exonic	Conserved hypothetical protein.
OS_LNC1692	Os09g0450700	Os09t0450700-01	sense	intergenic	2941	same_strand	upstream	Conserved hypothetical protein.
OS_LNC1694	Os09g0458200	Os09t0458200-01	antisense	genic	0	containing	intronic	Conserved hypothetical protein.
OS_LNC1694	Os09g0460100	Os09t0460100-01	antisense	genic	0	containing	intronic	Conserved hypothetical protein.
OS_LNC1696	Os09g0468900	Os09t0468900-01	antisense	intergenic	5849	divergent	upstream	Conserved hypothetical protein.
OS_LNC1699	Os09g0491676	Os09t0491676-01	sense	intergenic	2190	same_strand	downstream	Conserved hypothetical protein.
OS_LNC1699	Os09g0491676	Os09t0491676-02	sense	intergenic	2042	same_strand	downstream	Conserved hypothetical protein.
OS_LNC1699	Os09g0491644	Os09t0491644-01	sense	intergenic	176	same_strand	upstream	Conserved hypothetical protein.
OS_LNC1719	Os09g0560300	Os09t0560300-01	sense	intergenic	1712	same_strand	downstream	Conserved hypothetical protein.
OS_LNC1732	Os01g0838100	Os01t0838100-01	sense	intergenic	6148	same_strand	downstream	Conserved hypothetical protein.
OS_LNC1732	Os01g0838400	Os01t0838400-01	antisense	intergenic	1908	convergent	downstream	Conserved hypothetical protein.
OS_LNC1732	Os01g0838350	Os01t0838350-01	antisense	genic	0	overlapping	exonic	Conserved hypothetical protein.
OS_LNC1734	Os01g0847100	Os01t0847100-01	sense	intergenic	6983	same_strand	upstream	Conserved hypothetical protein.
OS_LNC1741	Os01g0871350	Os01t0871350-01	sense	genic	0	containing	exonic	Conserved hypothetical protein.
OS_LNC1748	Os01g0886350	Os01t0886350-01	sense	intergenic	844	same_strand	upstream	Conserved hypothetical protein.
OS_LNC1752	Os01g0897100	Os01t0897100-01	sense	intergenic	7331	same_strand	downstream	Conserved hypothetical protein.
OS_LNC1754	Os01g0910500	Os01t0910500-01	antisense	intergenic	8930	convergent	downstream	Conserved hypothetical protein.
OS_LNC1756	Os01g0920100	Os01t0920100-01	antisense	intergenic	769	convergent	downstream	Conserved hypothetical protein.
OS_LNC1757	Os01g0923000	Os01t0923000-01	sense	genic	0	containing	exonic	Conserved hypothetical protein.
OS_LNC1758	Os01g0923000	Os01t0923000-01	antisense	intergenic	6757	convergent	downstream	Conserved hypothetical protein.
OS_LNC1759	Os01g0923000	Os01t0923000-01	antisense	intergenic	8335	convergent	downstream	Conserved hypothetical protein.
OS_LNC1766	Os01g0944000	Os01t0944000-01	antisense	intergenic	1262	divergent	upstream	Conserved hypothetical protein.
OS_LNC1766	Os01g0944000	Os01t0944000-02	antisense	intergenic	1262	divergent	upstream	Conserved hypothetical protein.
OS_LNC1766	Os01g0944100	Os01t0944100-01	sense	genic	0	nested	exonic	Conserved hypothetical protein.
OS_LNC1766	Os01g0944100	Os01t0944100-03	sense	genic	0	containing	exonic	Conserved hypothetical protein.
OS_LNC1779	Os01g0967800	Os01t0967800-01	sense	intergenic	428	same_strand	upstream	Conserved hypothetical protein.
OS_LNC1780	Os01g0967800	Os01t0967800-01	sense	intergenic	5671	same_strand	downstream	Conserved hypothetical protein.
OS_LNC1781	Os01g0974300	Os01t0974300-01	sense	intergenic	795	same_strand	downstream	Conserved hypothetical protein.
OS_LNC1786	Os10g0124100	Os10t0124100-01	sense	intergenic	624	same_strand	upstream	Conserved hypothetical protein.
OS_LNC1793	Os10g0161800	Os10t0161800-00	antisense	intergenic	9117	convergent	downstream	Conserved hypothetical protein.
OS_LNC1794	Os10g0161800	Os10t0161800-00	sense	genic	0	containing	exonic	Conserved hypothetical protein.
OS_LNC1807	Os10g0185100	Os10t0185100-01	sense	genic	0	overlapping	exonic	Conserved hypothetical protein.
OS_LNC1808	Os10g0185100	Os10t0185100-01	sense	genic	0	overlapping	exonic	Conserved hypothetical protein.
OS_LNC1809	Os10g0185100	Os10t0185100-01	sense	genic	0	overlapping	exonic	Conserved hypothetical protein.
OS_LNC1810	Os10g0185100	Os10t0185100-01	sense	genic	0	overlapping	exonic	Conserved hypothetical protein.
OS_LNC1830	Os01g0184700	Os01t0184700-01	antisense	intergenic	8902	divergent	upstream	Conserved hypothetical protein.
OS_LNC1835	Os10g0364900	Os10t0364900-01	antisense	intergenic	19	divergent	upstream	Conserved hypothetical protein.
OS_LNC1838	Os10g0371200	Os10t0371200-01	antisense	intergenic	19020	divergent	upstream	Conserved hypothetical protein.
OS_LNC1839	Os10g0371200	Os10t0371200-01	antisense	intergenic	19037	divergent	upstream	Conserved hypothetical protein.
OS_LNC1840	Os10g0371200	Os10t0371200-01	antisense	intergenic	19037	divergent	upstream	Conserved hypothetical protein.
OS_LNC1842	Os10g0382400	Os10t0382400-01	sense	genic	0	containing	exonic	Conserved hypothetical protein.
OS_LNC1842	Os10g0382600	Os10t0382600-01	sense	genic	0	overlapping	exonic	Conserved hypothetical protein.
OS_LNC1843	Os10g0382400	Os10t0382400-01	sense	genic	0	containing	exonic	Conserved hypothetical protein.
OS_LNC1843	Os10g0382600	Os10t0382600-01	sense	genic	0	overlapping	exonic	Conserved hypothetical protein.
OS_LNC1844	Os10g0382400	Os10t0382400-01	sense	genic	0	containing	exonic	Conserved hypothetical protein.
OS_LNC1844	Os10g0382600	Os10t0382600-01	sense	genic	0	overlapping	exonic	Conserved hypothetical protein.
OS_LNC1853	Os10g0415400	Os10t0415400-01	sense	genic	0	containing	exonic	Conserved hypothetical protein.
OS_LNC1866	Os10g0462600	Os10t0462600-01	sense	intergenic	1438	same_strand	downstream	Conserved hypothetical protein.
OS_LNC1866	Os10g0462500	Os10t0462500-01	antisense	intergenic	427	convergent	downstream	Conserved hypothetical protein.
OS_LNC1866	Os10g0462600	Os10t0462600-02	sense	genic	0	nested	exonic	Conserved hypothetical protein.
OS_LNC1867	Os10g0462600	Os10t0462600-01	sense	intergenic	1432	same_strand	downstream	Conserved hypothetical protein.
OS_LNC1867	Os10g0462500	Os10t0462500-01	antisense	intergenic	427	convergent	downstream	Conserved hypothetical protein.
OS_LNC1867	Os10g0462600	Os10t0462600-02	sense	genic	0	nested	exonic	Conserved hypothetical protein.
OS_LNC1870	Os01g0194000	Os01t0194000-02	antisense	intergenic	1896	divergent	upstream	Conserved hypothetical protein.
OS_LNC1870	Os01g0194000	Os01t0194000-01	antisense	intergenic	1640	divergent	upstream	Conserved hypothetical protein.
OS_LNC1871	Os10g0482000	Os10t0482000-01	sense	genic	0	containing	exonic	Conserved hypothetical protein.
OS_LNC1872	Os10g0482000	Os10t0482000-01	sense	genic	0	containing	exonic	Conserved hypothetical protein.
OS_LNC1874	Os10g0487900	Os10t0487900-01	sense	genic	0	containing	exonic	Conserved hypothetical protein.
OS_LNC1876	Os10g0489650	Os10t0489650-01	antisense	intergenic	4749	divergent	upstream	Conserved hypothetical protein.
OS_LNC1878	Os10g0491400	Os10t0491400-01	sense	intergenic	9921	same_strand	downstream	Conserved hypothetical protein.
OS_LNC1878	Os10g0491450	Os10t0491450-00	antisense	intergenic	9107	divergent	upstream	Conserved hypothetical protein.
OS_LNC1878	Os10g0492000	Os10t0492000-01	antisense	intergenic	498	convergent	downstream	Conserved hypothetical protein.
OS_LNC1884	Os10g0516500	Os10t0516500-01	antisense	intergenic	8987	convergent	downstream	Conserved hypothetical protein.
OS_LNC1884	Os10g0516400	Os10t0516400-02	antisense	intergenic	1401	divergent	upstream	Conserved hypothetical protein.
OS_LNC1885	Os10g0516400	Os10t0516400-02	antisense	intergenic	5805	divergent	upstream	Conserved hypothetical protein.
OS_LNC1885	Os10g0516500	Os10t0516500-01	antisense	intergenic	2705	convergent	downstream	Conserved hypothetical protein.
OS_LNC1886	Os10g0516500	Os10t0516500-01	sense	intergenic	892	same_strand	upstream	Conserved hypothetical protein.
OS_LNC1888	Os10g0522500	Os10t0522500-02	sense	intergenic	2373	same_strand	upstream	Conserved hypothetical protein.
OS_LNC1888	Os10g0522500	Os10t0522500-01	sense	intergenic	2367	same_strand	upstream	Conserved hypothetical protein.
OS_LNC1893	Os10g0540050	Os10t0540050-00	antisense	intergenic	9006	convergent	downstream	Conserved hypothetical protein.
OS_LNC1897	Os10g0554001	Os10t0554001-01	antisense	intergenic	8022	divergent	upstream	Conserved hypothetical protein.
OS_LNC1903	Os10g0566900	Os10t0566900-01	antisense	intergenic	5271	convergent	downstream	Conserved hypothetical protein.
OS_LNC1904	Os10g0569500	Os10t0569500-01	antisense	genic	0	containing	intronic	Conserved hypothetical protein.
OS_LNC1905	Os10g0569500	Os10t0569500-01	antisense	intergenic	2583	divergent	upstream	Conserved hypothetical protein.
OS_LNC1906	Os10g0569500	Os10t0569500-01	sense	genic	0	containing	exonic	Conserved hypothetical protein.
OS_LNC1912	Os10g0572400	Os10t0572400-01	sense	intergenic	271	same_strand	downstream	Conserved hypothetical protein.
OS_LNC1915	Os10g0578050	Os10t0578050-02	sense	intergenic	4437	same_strand	upstream	Conserved hypothetical protein.
OS_LNC1918	Os11g0107450	Os11t0107450-01	sense	genic	0	containing	exonic	Conserved hypothetical protein.
OS_LNC1921	Os11g0115800	Os11t0115800-01	sense	genic	0	containing	exonic	Conserved hypothetical protein.
OS_LNC1922	Os11g0121300	Os11t0121300-01	sense	genic	0	containing	exonic	Conserved hypothetical protein.
OS_LNC1455	Os08g0135400	Os08t0135400-01	antisense	intergenic	2378	divergent	upstream	Copine domain containing protein.
OS_LNC1923	Os01g0205600	Os01t0205600-01	antisense	intergenic	3003	convergent	downstream	Crotonase, core domain containing protein.
OS_LNC1143	Os06g0231300	Os06t0231300-01	sense	intergenic	6613	same_strand	upstream	CS domain domain containing protein.
OS_LNC1144	Os06g0231300	Os06t0231300-01	antisense	intergenic	5019	divergent	upstream	CS domain domain containing protein.
OS_LNC0940	Os05g0116000	Os05t0116000-02	sense	intergenic	5553	same_strand	upstream	Cupin, RmlC-type domain containing protein.
OS_LNC0940	Os05g0116000	Os05t0116000-01	sense	intergenic	5402	same_strand	upstream	Cupin, RmlC-type domain containing protein.
OS_LNC1724	Os01g0810200	Os01t0810200-01	sense	intergenic	7270	same_strand	downstream	Cupin, RmlC-type domain containing protein.
OS_LNC0063	Os01g0222900	Os01t0222900-01	sense	intergenic	2691	same_strand	downstream	Curculin-like lectin domain containing protein.
OS_LNC1094	Os06g0106100	Os06t0106100-02	sense	intergenic	123	same_strand	upstream	Cwf15/Cwc15 cell cycle control protein family protein.
OS_LNC1094	Os06g0106100	Os06t0106100-01	sense	intergenic	115	same_strand	upstream	Cwf15/Cwc15 cell cycle control protein family protein.
OS_LNC0724	Os03g0737600	Os03t0737600-01	antisense	intergenic	2982	convergent	downstream	Cyclin H-1.
OS_LNC0687	Os03g0617500	Os03t0617500-01	antisense	intergenic	11961	convergent	downstream	Cyclin, C-terminal domain containing protein.
OS_LNC0168	Os12g0129700	Os12t0129700-01	antisense	genic	0	overlapping	intronic	Cyclin-like F-box domain containing protein.
OS_LNC0378	Os02g0288000	Os02t0288000-01	sense	intergenic	7514	same_strand	downstream	Cyclin-like F-box domain containing protein.
OS_LNC0378	Os02g0287900	Os02t0287900-01	sense	intergenic	3678	same_strand	downstream	Cyclin-like F-box domain containing protein.
OS_LNC0379	Os02g0288000	Os02t0288000-01	sense	intergenic	7530	same_strand	downstream	Cyclin-like F-box domain containing protein.
OS_LNC0379	Os02g0287900	Os02t0287900-01	sense	intergenic	3694	same_strand	downstream	Cyclin-like F-box domain containing protein.
OS_LNC0390	Os02g0317500	Os02t0317500-01	antisense	intergenic	5930	divergent	upstream	Cyclin-like F-box domain containing protein.
OS_LNC0485	Os02g0757700	Os02t0757700-01	antisense	intergenic	4582	convergent	downstream	Cyclin-like F-box domain containing protein.
OS_LNC0486	Os02g0757700	Os02t0757700-01	antisense	intergenic	4582	convergent	downstream	Cyclin-like F-box domain containing protein.
OS_LNC0523	Os02g0813166	Os02t0813166-00	sense	intergenic	4608	same_strand	upstream	Cyclin-like F-box domain containing protein.
OS_LNC0524	Os02g0813166	Os02t0813166-00	sense	intergenic	4608	same_strand	upstream	Cyclin-like F-box domain containing protein.
OS_LNC0700	Os03g0668000	Os03t0668000-01	antisense	intergenic	4185	divergent	upstream	Cyclin-like F-box domain containing protein.
OS_LNC0713	Os03g0699600	Os03t0699600-01	antisense	intergenic	340	convergent	downstream	Cyclin-like F-box domain containing protein.
OS_LNC1642	Os09g0261100	Os09t0261100-01	sense	intergenic	4791	same_strand	downstream	Cyclin-like F-box domain containing protein.
OS_LNC1681	Os01g0152950	Os01t0152950-00	antisense	intergenic	2691	convergent	downstream	Cyclin-like F-box domain containing protein.
OS_LNC1888	Os10g0522400	Os10t0522400-01	sense	genic	0	containing	exonic	Cyclin-like F-box domain containing protein.
OS_LNC0923	Os04g0628900	Os04t0628900-00	sense	genic	0	overlapping	exonic	Cyclin-P1-1.
OS_LNC0028	Os01g0111100	Os01t0111100-01	antisense	intergenic	7641	divergent	upstream	Cyclophilin-like domain containing protein.
OS_LNC1363	Os07g0476500	Os07t0476500-01	sense	intergenic	9853	same_strand	upstream	Cyclophilin-like domain containing protein.
OS_LNC1758	Os01g0923300	Os01t0923300-01	antisense	intergenic	1320	divergent	upstream	Cystathionine beta-synthase, core domain containing protein.
OS_LNC1759	Os01g0923300	Os01t0923300-01	antisense	intergenic	1379	divergent	upstream	Cystathionine beta-synthase, core domain containing protein.
OS_LNC0777	Os04g0165700	Os04t0165700-01	sense	intergenic	7498	same_strand	downstream	Cysteine synthase.
OS_LNC1309	Os01g0691500	Os01t0691500-01	antisense	intergenic	9712	convergent	downstream	Cytidylyltransferase domain containing protein.
OS_LNC0718	Os03g0718600	Os03t0718600-00	sense	genic	0	overlapping	exonic	Cytochrome c oxidase assembly protein CtaG/Cox11 family protein.
OS_LNC0871	Os04g0443801	Os04t0443801-02	antisense	intergenic	9479	convergent	downstream	Cytochrome c oxidase biogenesis protein Cmc1-like domain containing protein.
OS_LNC0321	Os02g0162000	Os02t0162000-01	antisense	intergenic	3048	convergent	downstream	Cytochrome c oxidase, subunit VIIa domain containing protein.
OS_LNC0321	Os02g0162000	Os02t0162000-02	antisense	intergenic	2876	convergent	downstream	Cytochrome c oxidase, subunit VIIa domain containing protein.
OS_LNC0677	Os03g0602300	Os03t0602300-01	antisense	genic	0	nested	exonic	Cytochrome P450 85A1.
OS_LNC0090	Os01g0227700	Os01t0227700-01	antisense	intergenic	1444	divergent	upstream	Cytochrome P450 family protein.
OS_LNC0090	Os01g0227500	Os01t0227500-01	antisense	intergenic	28	convergent	downstream	Cytochrome P450 family protein.
OS_LNC0337	Os02g0186800	Os02t0186800-00	sense	intergenic	8203	same_strand	upstream	Cytochrome P450 family protein.
OS_LNC0360	Os02g0221900	Os02t0221900-01	sense	intergenic	9645	same_strand	upstream	Cytochrome P450 family protein.
OS_LNC1252	Os06g0641800	Os06t0641800-00	sense	intergenic	212	same_strand	upstream	Cytochrome P450 family protein.
OS_LNC1583	Os08g0507100	Os08t0507100-00	antisense	intergenic	9799	divergent	upstream	Cytochrome P450 family protein.
OS_LNC1583	Os08g0507702	Os08t0507702-01	sense	intergenic	1120	same_strand	upstream	Cytochrome P450 family protein.
OS_LNC1584	Os08g0507100	Os08t0507100-00	antisense	intergenic	9881	divergent	upstream	Cytochrome P450 family protein.
OS_LNC1584	Os08g0507702	Os08t0507702-01	sense	intergenic	347	same_strand	upstream	Cytochrome P450 family protein.
OS_LNC1585	Os08g0507100	Os08t0507100-00	antisense	intergenic	9881	divergent	upstream	Cytochrome P450 family protein.
OS_LNC1585	Os08g0507702	Os08t0507702-01	sense	intergenic	5517	same_strand	upstream	Cytochrome P450 family protein.
OS_LNC1586	Os08g0507100	Os08t0507100-00	antisense	intergenic	9881	divergent	upstream	Cytochrome P450 family protein.
OS_LNC1586	Os08g0507702	Os08t0507702-01	sense	intergenic	347	same_strand	upstream	Cytochrome P450 family protein.
OS_LNC1587	Os08g0507100	Os08t0507100-00	antisense	intergenic	9930	divergent	upstream	Cytochrome P450 family protein.
OS_LNC1587	Os08g0507702	Os08t0507702-01	sense	intergenic	38	same_strand	upstream	Cytochrome P450 family protein.
OS_LNC1694	Os09g0457100	Os09t0457100-01	sense	intergenic	8474	same_strand	upstream	Cytochrome P450 family protein.
OS_LNC1708	Os09g0530300	Os09t0530300-01	antisense	intergenic	4783	divergent	upstream	Cytochrome P450 family protein.
OS_LNC1709	Os09g0530300	Os09t0530300-01	antisense	intergenic	4783	divergent	upstream	Cytochrome P450 family protein.
OS_LNC1878	Os10g0491900	Os10t0491900-01	sense	genic	0	overlapping	exonic	D111/G-patch domain containing protein.
OS_LNC0290	Os12g0596300	Os12t0596300-01	sense	intergenic	831	same_strand	upstream	DC1 domain containing protein.
OS_LNC0586	Os03g0219700	Os03t0219700-01	antisense	intergenic	764	convergent	downstream	DEAD-like helicase, N-terminal domain containing protein.
OS_LNC0587	Os03g0219700	Os03t0219700-01	antisense	intergenic	679	convergent	downstream	DEAD-like helicase, N-terminal domain containing protein.
OS_LNC1830	Os01g0184500	Os01t0184500-01	sense	intergenic	1301	same_strand	downstream	DEAD-like helicase, N-terminal domain containing protein.
OS_LNC0940	Os05g0116100	Os05t0116100-01	sense	intergenic	1051	same_strand	upstream	Dehydroascorbate reductase.
OS_LNC0494	Os02g0787800	Os02t0787800-01	sense	genic	0	nested	exonic	Diacylglycerol kinase accessory region domain containing protein.
OS_LNC1463	Os08g0152700	Os08t0152700-01	antisense	intergenic	5519	divergent	upstream	Diacylglycerol kinase, catalytic region domain containing protein.
OS_LNC1848	Os10g0397400	Os10t0397400-01	sense	intergenic	9114	same_strand	downstream	Dim/dwf1 protein, Cell elongation protein DIMINUTO/Dwarf1, Brassinosteroid biosynthesis
OS_LNC0282	Os12g0511500	Os12t0511500-01	sense	genic	0	containing	intronic	Disease resistance protein domain containing protein.
OS_LNC0283	Os12g0511500	Os12t0511500-01	sense	genic	0	containing	intronic	Disease resistance protein domain containing protein.
OS_LNC1258	Os06g0667900	Os06t0667900-00	sense	intergenic	7581	same_strand	upstream	Disease resistance protein domain containing protein.
OS_LNC1332	Os07g0273900	Os07t0273900-01	sense	intergenic	189	same_strand	downstream	Disease resistance protein domain containing protein.
OS_LNC1704	Os09g0520100	Os09t0520100-02	antisense	intergenic	5052	convergent	downstream	DNA polymerase delta, subunit 4 family protein.
OS_LNC1704	Os09g0520100	Os09t0520100-01	antisense	intergenic	5027	convergent	downstream	DNA polymerase delta, subunit 4 family protein.
OS_LNC1705	Os09g0520100	Os09t0520100-02	antisense	intergenic	5148	convergent	downstream	DNA polymerase delta, subunit 4 family protein.
OS_LNC1705	Os09g0520100	Os09t0520100-01	antisense	intergenic	5123	convergent	downstream	DNA polymerase delta, subunit 4 family protein.
OS_LNC1114	Os06g0151600	Os06t0151600-01	sense	genic	0	nested	exonic	DNA repair protein RadA family protein.
OS_LNC1465	Os08g0154600	Os08t0154600-01	sense	intergenic	2785	same_strand	downstream	DNA Topoisomerase 1, Modulation of auxin-regulated root development and gravitropism
OS_LNC1466	Os08g0154600	Os08t0154600-01	sense	intergenic	2785	same_strand	downstream	DNA Topoisomerase 1, Modulation of auxin-regulated root development and gravitropism
OS_LNC1405	Os07g0615800	Os07t0615800-00	sense	genic	0	containing	exonic	DNA-directed RNA polymerase, M/15 kDa subunit domain containing protein.
OS_LNC1723	Os01g0805800	Os01t0805800-02	sense	genic	0	nested	exonic	DNA-directed RNA polymerase, RPB5 subunit domain containing protein.
OS_LNC1723	Os01g0805800	Os01t0805800-01	sense	genic	0	nested	exonic	DNA-directed RNA polymerase, RPB5 subunit domain containing protein.
OS_LNC1275	Os06g0719600	Os06t0719600-01	antisense	intergenic	6198	divergent	upstream	Domain of unknown function DUF1618 domain containing protein.
OS_LNC1281	Os06g0720700	Os06t0720700-01	sense	intergenic	2130	same_strand	upstream	Domain of unknown function DUF1618 domain containing protein.
OS_LNC1282	Os06g0720700	Os06t0720700-01	sense	intergenic	2130	same_strand	upstream	Domain of unknown function DUF1618 domain containing protein.
OS_LNC1283	Os06g0720700	Os06t0720700-01	antisense	genic	0	overlapping	exonic	Domain of unknown function DUF1618 domain containing protein.
OS_LNC1694	Os09g0463300	Os09t0463300-01	antisense	genic	0	containing	intronic	Domain of unknown function DUF547 domain containing protein.
OS_LNC1694	Os09g0463300	Os09t0463300-02	antisense	genic	0	containing	intronic	Domain of unknown function DUF547 domain containing protein.
OS_LNC1695	Os09g0463300	Os09t0463300-01	sense	intergenic	3980	same_strand	downstream	Domain of unknown function DUF547 domain containing protein.
OS_LNC1695	Os09g0463300	Os09t0463300-02	sense	intergenic	3962	same_strand	downstream	Domain of unknown function DUF547 domain containing protein.
OS_LNC0627	Os03g0342900	Os03t0342900-04	sense	genic	0	nested	exonic	Dormancyauxin associated family protein.
OS_LNC0627	Os03g0342900	Os03t0342900-02	sense	genic	0	nested	exonic	Dormancyauxin associated family protein.
OS_LNC0387	Os02g0304900	Os02t0304900-01	sense	intergenic	8459	same_strand	upstream	Drought-induced 19 family protein, Drought resistance, Positive regulation of abscisic acid response
OS_LNC0388	Os02g0304900	Os02t0304900-01	sense	intergenic	19599	same_strand	upstream	Drought-induced 19 family protein, Drought resistance, Positive regulation of abscisic acid response
OS_LNC1720	Os09g0572900	Os09t0572900-01	antisense	intergenic	7291	divergent	upstream	Dynamin-related protein 1E, Negative regulation of programmed cell death, Control of cytochrome c release
OS_LNC1721	Os09g0572900	Os09t0572900-01	sense	intergenic	5919	same_strand	upstream	Dynamin-related protein 1E, Negative regulation of programmed cell death, Control of cytochrome c release
OS_LNC1722	Os09g0572900	Os09t0572900-01	sense	intergenic	5919	same_strand	upstream	Dynamin-related protein 1E, Negative regulation of programmed cell death, Control of cytochrome c release
OS_LNC0886	Os04g0534300	Os04t0534300-01	sense	genic	0	nested	exonic	EF hand domain containing protein.
OS_LNC1694	Os09g0458700	Os09t0458700-01	antisense	genic	0	containing	intronic	EF hand domain containing protein.
OS_LNC1694	Os09g0458800	Os09t0458800-00	antisense	genic	0	containing	intronic	EF hand domain containing protein.
OS_LNC1694	Os09g0458900	Os09t0458900-01	antisense	genic	0	containing	intronic	EF hand domain containing protein.
OS_LNC0559	Os03g0178000	Os03t0178000-01	antisense	genic	0	overlapping	exonic	EF-1 alpha.
OS_LNC0559	Os03g0177500	Os03t0177500-01	antisense	genic	0	containing	exonic	EF-1 alpha.
OS_LNC0559	Os03g0177900	Os03t0177900-01	antisense	genic	0	containing	intronic	EF-1 alpha.
OS_LNC0559	Os03g0177400	Os03t0177400-02	antisense	genic	0	overlapping	exonic	EF-1 alpha.
OS_LNC0559	Os03g0177400	Os03t0177400-01	antisense	genic	0	overlapping	exonic	EF-1 alpha.
OS_LNC0559	Os03g0177900	Os03t0177900-02	antisense	genic	0	containing	intronic	EF-1 alpha.
OS_LNC0560	Os03g0177500	Os03t0177500-01	antisense	genic	0	containing	intronic	EF-1 alpha.
OS_LNC0560	Os03g0177900	Os03t0177900-01	antisense	genic	0	containing	exonic	EF-1 alpha.
OS_LNC0560	Os03g0178000	Os03t0178000-01	antisense	genic	0	overlapping	exonic	EF-1 alpha.
OS_LNC0560	Os03g0177400	Os03t0177400-02	antisense	genic	0	overlapping	exonic	EF-1 alpha.
OS_LNC0560	Os03g0177400	Os03t0177400-01	antisense	genic	0	overlapping	exonic	EF-1 alpha.
OS_LNC0560	Os03g0177900	Os03t0177900-02	antisense	genic	0	containing	exonic	EF-1 alpha.
OS_LNC0561	Os03g0178000	Os03t0178000-01	antisense	intergenic	4016	divergent	upstream	EF-1 alpha.
OS_LNC0561	Os03g0177900	Os03t0177900-02	antisense	genic	0	overlapping	exonic	EF-1 alpha.
OS_LNC0561	Os03g0177400	Os03t0177400-02	antisense	genic	0	overlapping	exonic	EF-1 alpha.
OS_LNC0561	Os03g0177400	Os03t0177400-01	antisense	genic	0	overlapping	exonic	EF-1 alpha.
OS_LNC0561	Os03g0177500	Os03t0177500-01	antisense	genic	0	containing	exonic	EF-1 alpha.
OS_LNC0561	Os03g0177900	Os03t0177900-01	antisense	genic	0	overlapping	exonic	EF-1 alpha.
OS_LNC0562	Os03g0177900	Os03t0177900-02	antisense	genic	0	containing	exonic	EF-1 alpha.
OS_LNC0562	Os03g0177400	Os03t0177400-02	antisense	genic	0	overlapping	exonic	EF-1 alpha.
OS_LNC0562	Os03g0177400	Os03t0177400-01	antisense	genic	0	overlapping	exonic	EF-1 alpha.
OS_LNC0562	Os03g0178000	Os03t0178000-01	antisense	genic	0	overlapping	exonic	EF-1 alpha.
OS_LNC0562	Os03g0177500	Os03t0177500-01	antisense	genic	0	containing	intronic	EF-1 alpha.
OS_LNC0562	Os03g0177900	Os03t0177900-01	antisense	genic	0	containing	exonic	EF-1 alpha.
OS_LNC0563	Os03g0177400	Os03t0177400-01	antisense	intergenic	3822	convergent	downstream	EF-1 alpha.
OS_LNC0563	Os03g0177400	Os03t0177400-02	antisense	intergenic	3818	convergent	downstream	EF-1 alpha.
OS_LNC0563	Os03g0177900	Os03t0177900-02	antisense	genic	0	containing	intronic	EF-1 alpha.
OS_LNC0563	Os03g0177500	Os03t0177500-01	antisense	genic	0	overlapping	exonic	EF-1 alpha.
OS_LNC0563	Os03g0177900	Os03t0177900-01	antisense	genic	0	containing	intronic	EF-1 alpha.
OS_LNC0563	Os03g0178000	Os03t0178000-01	antisense	genic	0	overlapping	exonic	EF-1 alpha.
OS_LNC0564	Os03g0177500	Os03t0177500-01	antisense	intergenic	8964	convergent	downstream	EF-1 alpha.
OS_LNC0564	Os03g0177900	Os03t0177900-02	antisense	genic	0	containing	exonic	EF-1 alpha.
OS_LNC0564	Os03g0178000	Os03t0178000-01	antisense	genic	0	overlapping	exonic	EF-1 alpha.
OS_LNC0564	Os03g0177900	Os03t0177900-01	antisense	genic	0	overlapping	exonic	EF-1 alpha.
OS_LNC0565	Os03g0178000	Os03t0178000-01	antisense	genic	0	overlapping	exonic	EF-1 alpha.
OS_LNC0565	Os03g0177500	Os03t0177500-01	antisense	genic	0	containing	exonic	EF-1 alpha.
OS_LNC0565	Os03g0177900	Os03t0177900-01	antisense	genic	0	containing	intronic	EF-1 alpha.
OS_LNC0565	Os03g0177900	Os03t0177900-02	antisense	genic	0	containing	intronic	EF-1 alpha.
OS_LNC0565	Os03g0177400	Os03t0177400-02	antisense	genic	0	overlapping	exonic	EF-1 alpha.
OS_LNC0565	Os03g0177400	Os03t0177400-01	antisense	genic	0	overlapping	exonic	EF-1 alpha.
OS_LNC0566	Os03g0178000	Os03t0178000-01	antisense	intergenic	3609	divergent	upstream	EF-1 alpha.
OS_LNC0566	Os03g0177900	Os03t0177900-02	antisense	genic	0	overlapping	exonic	EF-1 alpha.
OS_LNC0566	Os03g0177900	Os03t0177900-01	antisense	genic	0	overlapping	exonic	EF-1 alpha.
OS_LNC0566	Os03g0177500	Os03t0177500-01	antisense	genic	0	containing	exonic	EF-1 alpha.
OS_LNC0566	Os03g0177400	Os03t0177400-01	antisense	genic	0	overlapping	exonic	EF-1 alpha.
OS_LNC0566	Os03g0177400	Os03t0177400-02	antisense	genic	0	overlapping	exonic	EF-1 alpha.
OS_LNC0567	Os03g0178000	Os03t0178000-01	antisense	intergenic	3609	divergent	upstream	EF-1 alpha.
OS_LNC0567	Os03g0177900	Os03t0177900-02	antisense	genic	0	overlapping	exonic	EF-1 alpha.
OS_LNC0567	Os03g0177400	Os03t0177400-01	antisense	genic	0	overlapping	exonic	EF-1 alpha.
OS_LNC0567	Os03g0177400	Os03t0177400-02	antisense	genic	0	overlapping	exonic	EF-1 alpha.
OS_LNC0567	Os03g0177900	Os03t0177900-01	antisense	genic	0	overlapping	exonic	EF-1 alpha.
OS_LNC0567	Os03g0177500	Os03t0177500-01	antisense	genic	0	containing	intronic	EF-1 alpha.
OS_LNC0568	Os03g0178000	Os03t0178000-01	antisense	genic	0	overlapping	exonic	EF-1 alpha.
OS_LNC0568	Os03g0177900	Os03t0177900-01	antisense	genic	0	containing	exonic	EF-1 alpha.
OS_LNC0568	Os03g0177500	Os03t0177500-01	antisense	genic	0	containing	intronic	EF-1 alpha.
OS_LNC0568	Os03g0177400	Os03t0177400-02	antisense	genic	0	overlapping	exonic	EF-1 alpha.
OS_LNC0568	Os03g0177400	Os03t0177400-01	antisense	genic	0	overlapping	exonic	EF-1 alpha.
OS_LNC0568	Os03g0177900	Os03t0177900-02	antisense	genic	0	containing	exonic	EF-1 alpha.
OS_LNC0569	Os03g0177900	Os03t0177900-02	antisense	intergenic	9839	divergent	upstream	EF-1 alpha.
OS_LNC0569	Os03g0177900	Os03t0177900-01	antisense	intergenic	7736	divergent	upstream	EF-1 alpha.
OS_LNC0569	Os03g0177500	Os03t0177500-01	antisense	genic	0	overlapping	exonic	EF-1 alpha.
OS_LNC0569	Os03g0177400	Os03t0177400-01	antisense	genic	0	overlapping	exonic	EF-1 alpha.
OS_LNC0569	Os03g0177400	Os03t0177400-02	antisense	genic	0	overlapping	exonic	EF-1 alpha.
OS_LNC0570	Os03g0178000	Os03t0178000-01	antisense	genic	0	overlapping	exonic	EF-1 alpha.
OS_LNC0570	Os03g0177400	Os03t0177400-02	antisense	genic	0	overlapping	exonic	EF-1 alpha.
OS_LNC0570	Os03g0177400	Os03t0177400-01	antisense	genic	0	overlapping	exonic	EF-1 alpha.
OS_LNC0570	Os03g0177900	Os03t0177900-02	antisense	genic	0	containing	exonic	EF-1 alpha.
OS_LNC0570	Os03g0177500	Os03t0177500-01	antisense	genic	0	containing	exonic	EF-1 alpha.
OS_LNC0570	Os03g0177900	Os03t0177900-01	antisense	genic	0	containing	exonic	EF-1 alpha.
OS_LNC0473	Os02g0700000	Os02t0700000-01	sense	intergenic	532	same_strand	downstream	EF-HAND 1 domain containing protein.
OS_LNC0474	Os02g0700000	Os02t0700000-01	sense	intergenic	532	same_strand	downstream	EF-HAND 1 domain containing protein.
OS_LNC1004	Os01g0135700	Os01t0135700-01	sense	intergenic	2970	same_strand	downstream	EF-HAND 2 domain containing protein.
OS_LNC0880	Os04g0502900	Os04t0502900-01	antisense	intergenic	3063	convergent	downstream	EF-Hand type domain containing protein.
OS_LNC0880	Os04g0502900	Os04t0502900-02	antisense	intergenic	3057	convergent	downstream	EF-Hand type domain containing protein.
OS_LNC1409	Os07g0631700	Os07t0631700-01	antisense	intergenic	2365	convergent	downstream	EF-Hand type domain containing protein.
OS_LNC1697	Os09g0471600	Os09t0471600-01	antisense	intergenic	4713	divergent	upstream	EGF-like calcium-binding domain containing protein.
OS_LNC0261	Os12g0444500	Os12t0444500-01	sense	genic	0	containing	exonic	EGF-like region, conserved site domain containing protein.
OS_LNC1767	Os01g0172800	Os01t0172800-01	antisense	intergenic	5996	convergent	downstream	Embryo-specific 3 family protein.
OS_LNC0491	Os02g0768200	Os02t0768200-02	sense	intergenic	4558	same_strand	downstream	emp24/gp25L/p24 family protein.
OS_LNC0491	Os02g0768200	Os02t0768200-01	sense	intergenic	4378	same_strand	downstream	emp24/gp25L/p24 family protein.
OS_LNC0599	Os03g0238300	Os03t0238300-01	sense	intergenic	9788	same_strand	downstream	Endonuclease/exonuclease/phosphatase domain containing protein.
OS_LNC0599	Os03g0238300	Os03t0238300-02	sense	intergenic	9788	same_strand	downstream	Endonuclease/exonuclease/phosphatase domain containing protein.
OS_LNC1814	Os10g0203000	Os10t0203000-01	sense	intergenic	17827	same_strand	upstream	Endonuclease/exonuclease/phosphatase domain containing protein.
OS_LNC1075	Os05g0549000	Os05t0549000-02	sense	intergenic	9083	same_strand	downstream	Epsin-like, N-terminal domain containing protein.
OS_LNC1076	Os05g0549000	Os05t0549000-02	sense	intergenic	9532	same_strand	downstream	Epsin-like, N-terminal domain containing protein.
OS_LNC1263	Os06g0694200	Os06t0694200-01	antisense	intergenic	5608	divergent	upstream	Esterase, SGNH hydrolase-type domain containing protein.
OS_LNC1264	Os06g0694200	Os06t0694200-01	antisense	intergenic	6886	divergent	upstream	Esterase, SGNH hydrolase-type domain containing protein.
OS_LNC1265	Os06g0694200	Os06t0694200-01	antisense	intergenic	6889	divergent	upstream	Esterase, SGNH hydrolase-type domain containing protein.
OS_LNC1266	Os06g0694200	Os06t0694200-01	antisense	intergenic	6889	divergent	upstream	Esterase, SGNH hydrolase-type domain containing protein.
OS_LNC1267	Os06g0694200	Os06t0694200-01	antisense	intergenic	6889	divergent	upstream	Esterase, SGNH hydrolase-type domain containing protein.
OS_LNC1268	Os06g0694200	Os06t0694200-01	antisense	intergenic	6892	divergent	upstream	Esterase, SGNH hydrolase-type domain containing protein.
OS_LNC0502	Os02g0796600	Os02t0796600-01	sense	intergenic	9291	same_strand	upstream	Esterase/lipase/thioesterase domain containing protein.
OS_LNC0361	Os01g0116600	Os01t0116600-02	sense	intergenic	9217	same_strand	downstream	Eukaryotic translation elongation factor 1 alpha-like protein, Negative regulation of cell death, Defense response
OS_LNC0361	Os01g0116600	Os01t0116600-01	sense	intergenic	9217	same_strand	downstream	Eukaryotic translation elongation factor 1 alpha-like protein, Negative regulation of cell death, Defense response
OS_LNC1314	Os07g0210100	Os07t0210100-01	sense	intergenic	1712	same_strand	downstream	Exo70 exocyst complex subunit domain containing protein.
OS_LNC1853	Os10g0415200	Os10t0415200-02	sense	intergenic	9070	same_strand	upstream	Exocyst complex subunit Sec15-like family protein.
OS_LNC0906	Os04g0583500	Os04t0583500-02	antisense	intergenic	9855	convergent	downstream	Expansin, Al-inducible expansin, Root cell elongation
OS_LNC0906	Os04g0583500	Os04t0583500-01	antisense	intergenic	9817	convergent	downstream	Expansin, Al-inducible expansin, Root cell elongation
OS_LNC1126	Os06g0188400	Os06t0188400-01	antisense	intergenic	50	convergent	downstream	Extracellular ligand-binding receptor domain containing protein.
OS_LNC1127	Os06g0188400	Os06t0188400-01	antisense	intergenic	50	convergent	downstream	Extracellular ligand-binding receptor domain containing protein.
OS_LNC1128	Os06g0188400	Os06t0188400-01	antisense	intergenic	50	convergent	downstream	Extracellular ligand-binding receptor domain containing protein.
OS_LNC1129	Os06g0188400	Os06t0188400-01	antisense	intergenic	50	convergent	downstream	Extracellular ligand-binding receptor domain containing protein.
OS_LNC1130	Os06g0188400	Os06t0188400-01	antisense	intergenic	50	convergent	downstream	Extracellular ligand-binding receptor domain containing protein.
OS_LNC1131	Os06g0188400	Os06t0188400-01	antisense	intergenic	50	convergent	downstream	Extracellular ligand-binding receptor domain containing protein.
OS_LNC1132	Os06g0188400	Os06t0188400-01	antisense	intergenic	50	convergent	downstream	Extracellular ligand-binding receptor domain containing protein.
OS_LNC1133	Os06g0188400	Os06t0188400-01	antisense	intergenic	50	convergent	downstream	Extracellular ligand-binding receptor domain containing protein.
OS_LNC1134	Os06g0188400	Os06t0188400-01	antisense	intergenic	50	convergent	downstream	Extracellular ligand-binding receptor domain containing protein.
OS_LNC1135	Os06g0188400	Os06t0188400-01	antisense	intergenic	50	convergent	downstream	Extracellular ligand-binding receptor domain containing protein.
OS_LNC1136	Os06g0188400	Os06t0188400-01	antisense	intergenic	50	convergent	downstream	Extracellular ligand-binding receptor domain containing protein.
OS_LNC1137	Os06g0188400	Os06t0188400-01	antisense	intergenic	50	convergent	downstream	Extracellular ligand-binding receptor domain containing protein.
OS_LNC1303	Os07g0187200	Os07t0187200-01	antisense	intergenic	2455	convergent	downstream	FAD linked oxidase, N-terminal domain containing protein.
OS_LNC0754	Os03g0843700	Os03t0843700-01	antisense	intergenic	3747	convergent	downstream	FAR1 domain containing protein.
OS_LNC1580	Os08g0502400	Os08t0502400-01	antisense	intergenic	8206	divergent	upstream	FAS1 domain domain containing protein.
OS_LNC0964	Os05g0172100	Os05t0172100-01	sense	intergenic	1892	same_strand	downstream	F-box associated type 1 domain containing protein.
OS_LNC0534	Os02g0824900	Os02t0824900-01	sense	intergenic	9979	same_strand	downstream	F-box domain, cyclin-like domain containing protein.
OS_LNC1438	Os08g0104600	Os08t0104600-02	sense	intergenic	393	same_strand	downstream	Ferredoxin I, chloroplast precursor.
OS_LNC0734	Os03g0784700	Os03t0784700-02	antisense	intergenic	8307	divergent	upstream	Ferredoxin--NADP reductase, root isozyme, chloroplast precursor.
OS_LNC1289	Os07g0111700	Os07t0111700-03	antisense	intergenic	16220	divergent	upstream	Flavin monooxygenase FMO domain containing protein.
OS_LNC1289	Os07g0111700	Os07t0111700-02	antisense	intergenic	15879	divergent	upstream	Flavin monooxygenase FMO domain containing protein.
OS_LNC1289	Os07g0111700	Os07t0111700-01	antisense	intergenic	15855	divergent	upstream	Flavin monooxygenase FMO domain containing protein.
OS_LNC1590	Os08g0517500	Os08t0517500-01	sense	intergenic	7443	same_strand	downstream	FMN-binding split barrel domain containing protein.
OS_LNC0847	Os04g0371000	Os04t0371000-00	sense	intergenic	3191	same_strand	downstream	Four-helical cytokine family protein.
OS_LNC0573	Os03g0193225	Os03t0193225-01	antisense	intergenic	4070	convergent	downstream	Frigida-like family protein.
OS_LNC0750	Os03g0829000	Os03t0829000-02	antisense	intergenic	7878	convergent	downstream	Fumarylacetoacetase, C-terminal-related domain containing protein.
OS_LNC0750	Os03g0829000	Os03t0829000-03	antisense	intergenic	7781	convergent	downstream	Fumarylacetoacetase, C-terminal-related domain containing protein.
OS_LNC0750	Os03g0829000	Os03t0829000-01	antisense	intergenic	7387	convergent	downstream	Fumarylacetoacetase, C-terminal-related domain containing protein.
OS_LNC0699	Os03g0665000	Os03t0665000-00	antisense	intergenic	9503	divergent	upstream	GCN5-related N-acetyltransferase domain domain containing protein.
OS_LNC0783	Os04g0185600	Os04t0185600-00	antisense	intergenic	20	convergent	downstream	General substrate transporter domain containing protein.
OS_LNC1494	Os08g0231400	Os08t0231400-01	sense	intergenic	6056	same_strand	downstream	Germin-like protein 8-12, Disease resistance
OS_LNC1495	Os08g0231400	Os08t0231400-01	sense	intergenic	6153	same_strand	downstream	Germin-like protein 8-12, Disease resistance
OS_LNC1423	Os07g0664600	Os07t0664600-02	antisense	intergenic	8031	convergent	downstream	Glucose/ribitol dehydrogenase family protein.
OS_LNC0733	Os03g0776000	Os03t0776000-01	antisense	intergenic	1591	convergent	downstream	Glucose-6-phosphate isomerase, cytosolic A.
OS_LNC1372	Os07g0523400	Os07t0523400-01	antisense	genic	0	containing	intronic	Glucose-6-phosphate/phosphate-translocator precursor.
OS_LNC1373	Os07g0523400	Os07t0523400-01	antisense	genic	0	containing	intronic	Glucose-6-phosphate/phosphate-translocator precursor.
OS_LNC0494	Os02g0787600	Os02t0787600-01	antisense	intergenic	475	convergent	downstream	Glutamate receptor-related domain containing protein.
OS_LNC0494	Os02g0787600	Os02t0787600-02	antisense	intergenic	473	convergent	downstream	Glutamate receptor-related domain containing protein.
OS_LNC1354	Os07g0462000	Os07t0462000-01	sense	intergenic	5283	same_strand	upstream	Glutamate--cysteine ligase, GCS2 family protein.
OS_LNC0930	Os04g0659100	Os04t0659100-02	antisense	genic	0	overlapping	exonic	Glutamine synthetase shoot isozyme, chloroplast precursor.
OS_LNC0930	Os04g0659100	Os04t0659100-01	antisense	genic	0	nested	exonic	Glutamine synthetase shoot isozyme, chloroplast precursor.
OS_LNC0930	Os04g0659100	Os04t0659100-03	antisense	genic	0	nested	exonic	Glutamine synthetase shoot isozyme, chloroplast precursor.
OS_LNC0491	Os02g0767900	Os02t0767900-01	antisense	intergenic	222	divergent	upstream	Glutaredoxin 2 family protein.
OS_LNC1613	Os08g0565800	Os08t0565800-02	antisense	intergenic	4511	divergent	upstream	Glutaredoxin.
OS_LNC0899	Os04g0556300	Os04t0556300-01	sense	intergenic	9625	same_strand	downstream	Glutathione peroxidase.
OS_LNC0391	Os02g0319300	Os02t0319300-01	antisense	intergenic	1290	convergent	downstream	Glutathione S-transferase, C-terminal-like domain containing protein.
OS_LNC0525	Os02g0814800	Os02t0814800-01	antisense	intergenic	338	convergent	downstream	Glutathione S-transferase, C-terminal-like domain containing protein.
OS_LNC0133	Os11g0679700	Os11t0679700-01	antisense	intergenic	8244	convergent	downstream	Glycerol-3-phosphate acyltransferase, Anther development, Pollen formation
OS_LNC0329	Os02g0170100	Os02t0170100-02	sense	genic	0	containing	exonic	Glycine cleavage H-protein family protein.
OS_LNC0877	Os04g0474300	Os04t0474300-01	antisense	intergenic	5020	divergent	upstream	Glycoside hydrolase, family 1 protein.
OS_LNC1752	Os01g0897600	Os01t0897600-01	sense	intergenic	4768	same_strand	upstream	Glycoside hydrolase, family 1 protein.
OS_LNC1772	Os01g0967100	Os01t0967100-01	antisense	intergenic	9055	convergent	downstream	Glycoside hydrolase, family 15 domain containing protein.
OS_LNC1773	Os01g0967100	Os01t0967100-01	antisense	intergenic	9069	convergent	downstream	Glycoside hydrolase, family 15 domain containing protein.
OS_LNC1774	Os01g0967100	Os01t0967100-01	antisense	intergenic	9069	convergent	downstream	Glycoside hydrolase, family 15 domain containing protein.
OS_LNC1775	Os01g0967100	Os01t0967100-01	antisense	intergenic	9110	convergent	downstream	Glycoside hydrolase, family 15 domain containing protein.
OS_LNC1776	Os01g0967100	Os01t0967100-01	antisense	intergenic	9446	convergent	downstream	Glycoside hydrolase, family 15 domain containing protein.
OS_LNC1777	Os01g0967100	Os01t0967100-01	antisense	intergenic	9446	convergent	downstream	Glycoside hydrolase, family 15 domain containing protein.
OS_LNC1778	Os01g0967100	Os01t0967100-01	antisense	intergenic	9446	convergent	downstream	Glycoside hydrolase, family 15 domain containing protein.
OS_LNC0586	Os03g0219400	Os03t0219400-01	antisense	intergenic	160	divergent	upstream	Glycoside hydrolase, family 20 protein.
OS_LNC0587	Os03g0219400	Os03t0219400-01	antisense	intergenic	160	divergent	upstream	Glycoside hydrolase, family 20 protein.
OS_LNC0967	Os05g0199500	Os05t0199500-02	sense	intergenic	2286	same_strand	upstream	Glycosyl transferase, family 31 protein.
OS_LNC0967	Os05g0199500	Os05t0199500-01	sense	intergenic	2286	same_strand	upstream	Glycosyl transferase, family 31 protein.
OS_LNC0968	Os05g0199500	Os05t0199500-01	sense	intergenic	2286	same_strand	upstream	Glycosyl transferase, family 31 protein.
OS_LNC0968	Os05g0199500	Os05t0199500-02	sense	intergenic	2286	same_strand	upstream	Glycosyl transferase, family 31 protein.
OS_LNC0969	Os05g0199500	Os05t0199500-01	sense	intergenic	2286	same_strand	upstream	Glycosyl transferase, family 31 protein.
OS_LNC0969	Os05g0199500	Os05t0199500-02	sense	intergenic	2286	same_strand	upstream	Glycosyl transferase, family 31 protein.
OS_LNC0970	Os05g0199500	Os05t0199500-01	sense	intergenic	2286	same_strand	upstream	Glycosyl transferase, family 31 protein.
OS_LNC0970	Os05g0199500	Os05t0199500-02	sense	intergenic	2286	same_strand	upstream	Glycosyl transferase, family 31 protein.
OS_LNC1420	Os07g0661100	Os07t0661100-01	antisense	intergenic	6851	divergent	upstream	Glycosyl transferase, family 4 protein.
OS_LNC1081	Os05g0559600	Os05t0559600-01	sense	genic	0	nested	exonic	Glycosyl transferase, family 43 protein.
OS_LNC1573	Os01g0754200	Os01t0754200-04	antisense	intergenic	2890	convergent	downstream	Glycosyl transferase, family 48 protein.
OS_LNC1573	Os01g0754200	Os01t0754200-03	antisense	intergenic	2652	convergent	downstream	Glycosyl transferase, family 48 protein.
OS_LNC1574	Os01g0754200	Os01t0754200-04	antisense	intergenic	2904	convergent	downstream	Glycosyl transferase, family 48 protein.
OS_LNC1574	Os01g0754200	Os01t0754200-03	antisense	intergenic	2666	convergent	downstream	Glycosyl transferase, family 48 protein.
OS_LNC1575	Os01g0754200	Os01t0754200-04	antisense	intergenic	2890	convergent	downstream	Glycosyl transferase, family 48 protein.
OS_LNC1575	Os01g0754200	Os01t0754200-03	antisense	intergenic	2652	convergent	downstream	Glycosyl transferase, family 48 protein.
OS_LNC1576	Os01g0754200	Os01t0754200-04	antisense	intergenic	2908	convergent	downstream	Glycosyl transferase, family 48 protein.
OS_LNC1576	Os01g0754200	Os01t0754200-03	antisense	intergenic	2670	convergent	downstream	Glycosyl transferase, family 48 protein.
OS_LNC0964	Os05g0171900	Os05t0171900-02	antisense	intergenic	6680	convergent	downstream	Glyoxalase/bleomycin resistance protein/dioxygenase domain containing protein.
OS_LNC0964	Os05g0171900	Os05t0171900-01	antisense	intergenic	3814	convergent	downstream	Glyoxalase/bleomycin resistance protein/dioxygenase domain containing protein.
OS_LNC1295	Os07g0160400	Os07t0160400-01	antisense	genic	0	overlapping	exonic	Glyoxalase/bleomycin resistance protein/dioxygenase domain containing protein.
OS_LNC0450	Os02g0602800	Os02t0602800-01	sense	genic	0	overlapping	exonic	Got1-like protein family protein.
OS_LNC0573	Os03g0193000	Os03t0193000-01	sense	intergenic	1400	same_strand	downstream	GRAS transcription factor domain containing protein.
OS_LNC1084	Os05g0586200	Os05t0586200-01	antisense	intergenic	11550	divergent	upstream	Gretchen hagen 3 family protein, Phytochrome, Jasmonate signaling
OS_LNC0868	Os04g0431100	Os04t0431100-02	antisense	intergenic	3732	convergent	downstream	GrpE protein homolog.
OS_LNC0868	Os04g0431100	Os04t0431100-01	antisense	intergenic	3732	convergent	downstream	GrpE protein homolog.
OS_LNC0623	Os01g0375000	Os01t0375000-01	sense	intergenic	6672	same_strand	upstream	GTP1/OBG domain containing protein.
OS_LNC0745	Os03g0816400	Os03t0816400-02	antisense	intergenic	9428	convergent	downstream	GTP-binding protein, HSR1-related domain containing protein.
OS_LNC1908	Os10g0572000	Os10t0572000-00	sense	intergenic	3773	same_strand	upstream	GTP-binding protein, HSR1-related domain containing protein.
OS_LNC1909	Os10g0572000	Os10t0572000-00	sense	intergenic	1239	same_strand	downstream	GTP-binding protein, HSR1-related domain containing protein.
OS_LNC1910	Os10g0572000	Os10t0572000-00	sense	intergenic	2003	same_strand	downstream	GTP-binding protein, HSR1-related domain containing protein.
OS_LNC1911	Os10g0572000	Os10t0572000-00	sense	intergenic	2003	same_strand	downstream	GTP-binding protein, HSR1-related domain containing protein.
OS_LNC1819	Os10g0214400	Os10t0214400-01	sense	genic	0	containing	exonic	GTP-binding signal recognition particle SRP54, G-domain containing protein.
OS_LNC0613	Os03g0320900	Os03t0320900-01	sense	genic	0	overlapping	exonic	Guanylate kinase family protein.
OS_LNC0592	Os03g0224300	Os03t0224300-01	sense	intergenic	267	same_strand	upstream	HAD-superfamily hydrolase subfamily IIB protein.
OS_LNC0526	Os02g0816100	Os02t0816100-02	antisense	intergenic	227	divergent	upstream	HAD-superfamily hydrolase, subfamily IA, variant 2 protein.
OS_LNC0526	Os02g0816100	Os02t0816100-01	antisense	intergenic	184	divergent	upstream	HAD-superfamily hydrolase, subfamily IA, variant 2 protein.
OS_LNC0527	Os02g0816100	Os02t0816100-02	antisense	intergenic	2557	divergent	upstream	HAD-superfamily hydrolase, subfamily IA, variant 2 protein.
OS_LNC0527	Os02g0816100	Os02t0816100-01	antisense	intergenic	2514	divergent	upstream	HAD-superfamily hydrolase, subfamily IA, variant 2 protein.
OS_LNC0528	Os02g0816100	Os02t0816100-02	antisense	intergenic	2558	divergent	upstream	HAD-superfamily hydrolase, subfamily IA, variant 2 protein.
OS_LNC0528	Os02g0816100	Os02t0816100-01	antisense	intergenic	2515	divergent	upstream	HAD-superfamily hydrolase, subfamily IA, variant 2 protein.
OS_LNC0529	Os02g0816100	Os02t0816100-02	antisense	intergenic	2565	divergent	upstream	HAD-superfamily hydrolase, subfamily IA, variant 2 protein.
OS_LNC0529	Os02g0816100	Os02t0816100-01	antisense	intergenic	2522	divergent	upstream	HAD-superfamily hydrolase, subfamily IA, variant 2 protein.
OS_LNC0057	Os11g0434000	Os11t0434000-01	sense	genic	0	nested	exonic	HAD-superfamily phosphatase, subfamily IIIC domain containing protein.
OS_LNC0057	Os11g0434000	Os11t0434000-02	sense	genic	0	nested	exonic	HAD-superfamily phosphatase, subfamily IIIC domain containing protein.
OS_LNC1416	Os01g0720400	Os01t0720400-01	sense	intergenic	2679	same_strand	downstream	HAD-superfamily subfamily IB hydrolase, hypothetical 1 protein.
OS_LNC1613	Os08g0566000	Os08t0566000-01	sense	intergenic	9170	same_strand	downstream	Haem oxygenase-like, multi-helical domain containing protein.
OS_LNC0664	Os03g0565200	Os03t0565200-01	sense	intergenic	8140	same_strand	downstream	Haloacid dehalogenase-like hydrolase domain containing protein.
OS_LNC0177	Os12g0159600	Os12t0159600-01	antisense	intergenic	3389	convergent	downstream	Harpin-induced 1 domain containing protein.
OS_LNC0177	Os12g0159600	Os12t0159600-02	antisense	intergenic	3300	convergent	downstream	Harpin-induced 1 domain containing protein.
OS_LNC0751	Os03g0836300	Os03t0836300-01	antisense	intergenic	6114	convergent	downstream	Harpin-induced 1 domain containing protein.
OS_LNC1155	Os06g0274000	Os06t0274000-01	antisense	intergenic	9527	divergent	upstream	Heat shock factor binding protein, Regulation of heat shock response and seed development
OS_LNC1013	Os05g0334400	Os05t0334400-01	antisense	genic	0	overlapping	intronic	Heat shock protein DnaJ family protein, Chloroplast development and differentiation
OS_LNC0164	Os01g0239100	Os01t0239100-01	antisense	intergenic	4885	divergent	upstream	Heat shock protein DnaJ family protein.
OS_LNC0863	Os01g0556400	Os01t0556400-01	antisense	intergenic	7620	divergent	upstream	Heat shock protein DnaJ family protein.
OS_LNC0101	Os11g0578100	Os11t0578100-00	sense	intergenic	5954	same_strand	upstream	Heat shock protein DnaJ, N-terminal domain containing protein.
OS_LNC1304	Os07g0192300	Os07t0192300-01	antisense	intergenic	1056	divergent	upstream	Heat shock protein DnaJ, N-terminal domain containing protein.
OS_LNC1305	Os07g0192300	Os07t0192300-01	antisense	intergenic	1089	divergent	upstream	Heat shock protein DnaJ, N-terminal domain containing protein.
OS_LNC1306	Os07g0192300	Os07t0192300-01	antisense	intergenic	1314	divergent	upstream	Heat shock protein DnaJ, N-terminal domain containing protein.
OS_LNC1577	Os08g0474600	Os08t0474600-01	sense	genic	0	containing	exonic	Heat shock protein DnaJ, N-terminal domain containing protein.
OS_LNC1694	Os09g0460000	Os09t0460000-01	antisense	genic	0	containing	intronic	Heat shock protein DnaJ, N-terminal domain containing protein.
OS_LNC0737	Os03g0795900	Os03t0795900-01	antisense	intergenic	1	divergent	upstream	Heat stress transcriptioon factor, High-temperature stress tolerance, Tolerance to environmental stresses
OS_LNC0446	Os02g0585200	Os02t0585200-01	sense	intergenic	7764	same_strand	downstream	Heavy metal transport/detoxification protein domain containing protein.
OS_LNC0446	Os02g0584800	Os02t0584800-01	sense	genic	0	containing	exonic	Heavy metal transport/detoxification protein domain containing protein.
OS_LNC0446	Os02g0584700	Os02t0584700-01	sense	genic	0	containing	exonic	Heavy metal transport/detoxification protein domain containing protein.
OS_LNC1729	Os01g0826000	Os01t0826000-00	sense	intergenic	904	same_strand	upstream	Heavy metal transport/detoxification protein domain containing protein.
OS_LNC1761	Os01g0933200	Os01t0933200-00	antisense	genic	0	overlapping	exonic	Heavy metal transport/detoxification protein domain containing protein.
OS_LNC1762	Os01g0933200	Os01t0933200-00	antisense	intergenic	32	divergent	upstream	Heavy metal transport/detoxification protein domain containing protein.
OS_LNC1763	Os01g0933200	Os01t0933200-00	antisense	intergenic	32	divergent	upstream	Heavy metal transport/detoxification protein domain containing protein.
OS_LNC1764	Os01g0933200	Os01t0933200-00	antisense	intergenic	703	divergent	upstream	Heavy metal transport/detoxification protein domain containing protein.
OS_LNC0401	Os02g0433600	Os02t0433600-01	sense	genic	0	nested	exonic	Helix-loop-helix DNA-binding domain containing protein.
OS_LNC0338	Os02g0189900	Os02t0189900-02	sense	intergenic	1633	same_strand	upstream	Hepatocellular carcinoma-associated antigen 59 family protein.
OS_LNC0338	Os02g0189900	Os02t0189900-01	sense	intergenic	773	same_strand	upstream	Hepatocellular carcinoma-associated antigen 59 family protein.
OS_LNC0339	Os02g0189900	Os02t0189900-02	sense	intergenic	1633	same_strand	upstream	Hepatocellular carcinoma-associated antigen 59 family protein.
OS_LNC0339	Os02g0189900	Os02t0189900-01	sense	intergenic	773	same_strand	upstream	Hepatocellular carcinoma-associated antigen 59 family protein.
OS_LNC0340	Os02g0189900	Os02t0189900-02	sense	intergenic	1633	same_strand	upstream	Hepatocellular carcinoma-associated antigen 59 family protein.
OS_LNC0340	Os02g0189900	Os02t0189900-01	sense	intergenic	773	same_strand	upstream	Hepatocellular carcinoma-associated antigen 59 family protein.
OS_LNC0341	Os02g0189900	Os02t0189900-02	sense	intergenic	1633	same_strand	upstream	Hepatocellular carcinoma-associated antigen 59 family protein.
OS_LNC0341	Os02g0189900	Os02t0189900-01	sense	intergenic	773	same_strand	upstream	Hepatocellular carcinoma-associated antigen 59 family protein.
OS_LNC0206	Os12g0233300	Os12t0233300-01	antisense	intergenic	6386	divergent	upstream	Histidine triad protein family protein.
OS_LNC0190	Os12g0182700	Os12t0182700-01	sense	intergenic	525	same_strand	downstream	Histone deacetylase superfamily protein.
OS_LNC0242	Os12g0298600	Os12t0298600-00	antisense	intergenic	15027	divergent	upstream	Histone H4 acetyltransferase, NuA4 complex, Eaf6 domain containing protein.
OS_LNC1734	Os01g0846900	Os01t0846900-01	antisense	intergenic	528	convergent	downstream	Histone-fold domain containing protein.
OS_LNC1699	Os09g0491660	Os09t0491660-01	sense	intergenic	163	same_strand	downstream	Homeodomain-like containing protein.
OS_LNC0734	Os03g0784800	Os03t0784800-02	antisense	intergenic	1522	divergent	upstream	Homo sapiens protein involved in sexual development, complete cds.
OS_LNC0734	Os03g0784800	Os03t0784800-01	antisense	intergenic	1472	divergent	upstream	Homo sapiens protein involved in sexual development, complete cds.
OS_LNC1104	Os06g0142600	Os06t0142600-01	sense	intergenic	2076	same_strand	downstream	Homolog of the Arabidopsis EARLY FLOWERING 3 protein, Photoperiodic flowering, Short-day/long-day promotion
OS_LNC1105	Os06g0142600	Os06t0142600-01	sense	intergenic	454	same_strand	downstream	Homolog of the Arabidopsis EARLY FLOWERING 3 protein, Photoperiodic flowering, Short-day/long-day promotion
OS_LNC1106	Os06g0142600	Os06t0142600-01	sense	intergenic	454	same_strand	downstream	Homolog of the Arabidopsis EARLY FLOWERING 3 protein, Photoperiodic flowering, Short-day/long-day promotion
OS_LNC0777	Os04g0165400	Os04t0165400-01	sense	intergenic	2256	same_strand	upstream	Hrf1 family protein.
OS_LNC1410	Os07g0635900	Os07t0635900-01	sense	intergenic	2224	same_strand	upstream	Hydrophobic protein LTI6A.
OS_LNC1411	Os07g0635900	Os07t0635900-01	sense	genic	0	containing	exonic	Hydrophobic protein LTI6A.
OS_LNC0046	Os11g0308432	Os11t0308432-01	sense	genic	0	containing	intronic	Hypothetical conserved gene.
OS_LNC0047	Os11g0308432	Os11t0308432-01	sense	intergenic	6032	same_strand	downstream	Hypothetical conserved gene.
OS_LNC0070	Os11g0490300	Os11t0490300-00	antisense	intergenic	2600	divergent	upstream	Hypothetical conserved gene.
OS_LNC0092	Os11g0551350	Os11t0551350-01	sense	intergenic	9480	same_strand	downstream	Hypothetical conserved gene.
OS_LNC0093	Os11g0551350	Os11t0551350-01	sense	genic	0	containing	exonic	Hypothetical conserved gene.
OS_LNC0094	Os11g0551350	Os11t0551350-01	sense	genic	0	containing	exonic	Hypothetical conserved gene.
OS_LNC0102	Os11g0582000	Os11t0582000-00	sense	intergenic	1196	same_strand	upstream	Hypothetical conserved gene.
OS_LNC0125	Os11g0645600	Os11t0645600-01	sense	genic	0	containing	exonic	Hypothetical conserved gene.
OS_LNC0132	Os11g0676500	Os11t0676500-00	sense	intergenic	4320	same_strand	upstream	Hypothetical conserved gene.
OS_LNC0134	Os11g0685300	Os11t0685300-01	antisense	intergenic	1665	divergent	upstream	Hypothetical conserved gene.
OS_LNC0190	Os12g0182600	Os12t0182600-01	antisense	intergenic	5683	divergent	upstream	Hypothetical conserved gene.
OS_LNC0192	Os12g0191200	Os12t0191200-01	sense	genic	0	containing	exonic	Hypothetical conserved gene.
OS_LNC0193	Os12g0191200	Os12t0191200-01	sense	genic	0	overlapping	exonic	Hypothetical conserved gene.
OS_LNC0197	Os12g0204200	Os12t0204200-01	sense	genic	0	overlapping	exonic	Hypothetical conserved gene.
OS_LNC0201	Os12g0221700	Os12t0221700-00	antisense	genic	0	containing	intronic	Hypothetical conserved gene.
OS_LNC0206	Os12g0233200	Os12t0233200-00	sense	intergenic	2727	same_strand	downstream	Hypothetical conserved gene.
OS_LNC0221	Os12g0275400	Os12t0275400-01	antisense	genic	0	overlapping	exonic	Hypothetical conserved gene.
OS_LNC0225	Os12g0289800	Os12t0289800-00	sense	intergenic	530	same_strand	downstream	Hypothetical conserved gene.
OS_LNC0257	Os12g0438400	Os12t0438400-02	antisense	intergenic	3980	divergent	upstream	Hypothetical conserved gene.
OS_LNC0257	Os12g0438400	Os12t0438400-01	antisense	intergenic	3834	divergent	upstream	Hypothetical conserved gene.
OS_LNC0258	Os12g0438400	Os12t0438400-02	antisense	intergenic	4524	divergent	upstream	Hypothetical conserved gene.
OS_LNC0258	Os12g0438400	Os12t0438400-01	antisense	intergenic	4378	divergent	upstream	Hypothetical conserved gene.
OS_LNC0272	Os12g0483600	Os12t0483600-00	antisense	intergenic	4833	convergent	downstream	Hypothetical conserved gene.
OS_LNC0272	Os12g0483700	Os12t0483700-02	sense	genic	0	containing	exonic	Hypothetical conserved gene.
OS_LNC0273	Os12g0483600	Os12t0483600-00	antisense	intergenic	5384	convergent	downstream	Hypothetical conserved gene.
OS_LNC0273	Os12g0483700	Os12t0483700-02	sense	genic	0	containing	exonic	Hypothetical conserved gene.
OS_LNC0289	Os12g0595600	Os12t0595600-00	sense	intergenic	1096	same_strand	downstream	Hypothetical conserved gene.
OS_LNC0292	Os01g0115100	Os01t0115100-01	antisense	intergenic	1441	divergent	upstream	Hypothetical conserved gene.
OS_LNC0320	Os02g0156600	Os02t0156600-00	antisense	intergenic	4699	convergent	downstream	Hypothetical conserved gene.
OS_LNC0332	Os02g0174300	Os02t0174300-00	antisense	intergenic	7597	convergent	downstream	Hypothetical conserved gene.
OS_LNC0336	Os02g0182850	Os02t0182850-00	antisense	intergenic	7473	convergent	downstream	Hypothetical conserved gene.
OS_LNC0344	Os02g0204500	Os02t0204500-02	sense	intergenic	3553	same_strand	downstream	Hypothetical conserved gene.
OS_LNC0344	Os02g0204500	Os02t0204500-03	sense	intergenic	996	same_strand	downstream	Hypothetical conserved gene.
OS_LNC0349	Os02g0211900	Os02t0211900-00	antisense	intergenic	2103	convergent	downstream	Hypothetical conserved gene.
OS_LNC0366	Os02g0234450	Os02t0234450-00	antisense	genic	0	overlapping	exonic	Hypothetical conserved gene.
OS_LNC0383	Os01g0298301	Os01t0298301-01	sense	intergenic	7688	same_strand	upstream	Hypothetical conserved gene.
OS_LNC0389	Os01g0299300	Os01t0299300-00	antisense	intergenic	3154	divergent	upstream	Hypothetical conserved gene.
OS_LNC0416	Os02g0462300	Os02t0462300-00	antisense	intergenic	5301	divergent	upstream	Hypothetical conserved gene.
OS_LNC0422	Os02g0477300	Os02t0477300-01	sense	intergenic	2133	same_strand	downstream	Hypothetical conserved gene.
OS_LNC0422	Os02g0477100	Os02t0477100-01	sense	genic	0	containing	exonic	Hypothetical conserved gene.
OS_LNC0423	Os02g0480200	Os02t0480200-01	sense	intergenic	774	same_strand	downstream	Hypothetical conserved gene.
OS_LNC0460	Os01g0324400	Os01t0324400-02	antisense	intergenic	11806	convergent	downstream	Hypothetical conserved gene.
OS_LNC0482	Os02g0743800	Os02t0743800-02	antisense	intergenic	2423	convergent	downstream	Hypothetical conserved gene.
OS_LNC0504	Os02g0798000	Os02t0798000-01	sense	genic	0	containing	exonic	Hypothetical conserved gene.
OS_LNC0519	Os02g0807800	Os02t0807800-01	antisense	intergenic	4960	convergent	downstream	Hypothetical conserved gene.
OS_LNC0520	Os02g0807800	Os02t0807800-01	antisense	intergenic	4960	convergent	downstream	Hypothetical conserved gene.
OS_LNC0521	Os02g0807800	Os02t0807800-01	antisense	intergenic	4960	convergent	downstream	Hypothetical conserved gene.
OS_LNC0522	Os02g0807800	Os02t0807800-01	antisense	intergenic	4960	convergent	downstream	Hypothetical conserved gene.
OS_LNC0535	Os02g0825650	Os02t0825650-01	sense	genic	0	nested	exonic	Hypothetical conserved gene.
OS_LNC0553	Os03g0150700	Os03t0150700-00	sense	genic	0	nested	exonic	Hypothetical conserved gene.
OS_LNC0554	Os03g0150700	Os03t0150700-00	antisense	genic	0	nested	exonic	Hypothetical conserved gene.
OS_LNC0555	Os03g0159900	Os03t0159900-01	antisense	genic	0	overlapping	exonic	Hypothetical conserved gene.
OS_LNC0555	Os03g0159900	Os03t0159900-02	antisense	genic	0	overlapping	exonic	Hypothetical conserved gene.
OS_LNC0599	Os03g0237900	Os03t0237900-01	sense	intergenic	1258	same_strand	upstream	Hypothetical conserved gene.
OS_LNC0607	Os03g0278700	Os03t0278700-01	antisense	intergenic	97	divergent	upstream	Hypothetical conserved gene.
OS_LNC0654	Os03g0431600	Os03t0431600-00	sense	genic	0	containing	exonic	Hypothetical conserved gene.
OS_LNC0656	Os03g0441601	Os03t0441601-01	sense	genic	0	overlapping	exonic	Hypothetical conserved gene.
OS_LNC0665	Os01g0391500	Os01t0391500-01	antisense	intergenic	9452	convergent	downstream	Hypothetical conserved gene.
OS_LNC0673	Os03g0593700	Os03t0593700-00	sense	genic	0	overlapping	exonic	Hypothetical conserved gene.
OS_LNC0675	Os03g0597450	Os03t0597450-01	sense	genic	0	containing	exonic	Hypothetical conserved gene.
OS_LNC0676	Os03g0597450	Os03t0597450-01	sense	genic	0	containing	exonic	Hypothetical conserved gene.
OS_LNC0680	Os03g0604600	Os03t0604600-01	sense	intergenic	620	same_strand	downstream	Hypothetical conserved gene.
OS_LNC0681	Os03g0604600	Os03t0604600-01	antisense	intergenic	6418	divergent	upstream	Hypothetical conserved gene.
OS_LNC0702	Os03g0674900	Os03t0674900-00	antisense	intergenic	2087	convergent	downstream	Hypothetical conserved gene.
OS_LNC0728	Os03g0755625	Os03t0755625-00	sense	genic	0	overlapping	exonic	Hypothetical conserved gene.
OS_LNC0729	Os03g0755625	Os03t0755625-00	sense	genic	0	overlapping	exonic	Hypothetical conserved gene.
OS_LNC0733	Os03g0776100	Os03t0776100-00	sense	intergenic	605	same_strand	upstream	Hypothetical conserved gene.
OS_LNC0737	Os03g0795400	Os03t0795400-00	antisense	intergenic	9410	convergent	downstream	Hypothetical conserved gene.
OS_LNC0792	Os04g0219200	Os04t0219200-01	sense	intergenic	567	same_strand	downstream	Hypothetical conserved gene.
OS_LNC0818	Os01g0544700	Os01t0544700-02	sense	genic	0	nested	exonic	Hypothetical conserved gene.
OS_LNC0818	Os01g0544700	Os01t0544700-01	sense	genic	0	nested	exonic	Hypothetical conserved gene.
OS_LNC0819	Os04g0282000	Os04t0282000-01	antisense	intergenic	3408	convergent	downstream	Hypothetical conserved gene.
OS_LNC0821	Os04g0286366	Os04t0286366-00	sense	intergenic	2341	same_strand	downstream	Hypothetical conserved gene.
OS_LNC0832	Os04g0331650	Os04t0331650-00	sense	genic	0	containing	exonic	Hypothetical conserved gene.
OS_LNC0833	Os04g0331650	Os04t0331650-00	antisense	intergenic	14119	divergent	upstream	Hypothetical conserved gene.
OS_LNC0853	Os04g0387000	Os04t0387000-00	sense	genic	0	containing	exonic	Hypothetical conserved gene.
OS_LNC0883	Os01g0566800	Os01t0566800-00	antisense	intergenic	9584	divergent	upstream	Hypothetical conserved gene.
OS_LNC0893	Os04g0544000	Os04t0544000-00	sense	intergenic	436	same_strand	upstream	Hypothetical conserved gene.
OS_LNC0905	Os04g0578550	Os04t0578550-00	sense	genic	0	containing	exonic	Hypothetical conserved gene.
OS_LNC0918	Os04g0620950	Os04t0620950-01	sense	intergenic	779	same_strand	downstream	Hypothetical conserved gene.
OS_LNC0947	Os05g0128100	Os05t0128100-01	antisense	intergenic	19539	divergent	upstream	Hypothetical conserved gene.
OS_LNC0949	Os05g0137800	Os05t0137800-01	sense	genic	0	nested	exonic	Hypothetical conserved gene.
OS_LNC0950	Os05g0137800	Os05t0137800-01	antisense	intergenic	437	divergent	upstream	Hypothetical conserved gene.
OS_LNC0951	Os05g0141000	Os05t0141000-00	antisense	genic	0	containing	intronic	Hypothetical conserved gene.
OS_LNC0952	Os05g0141000	Os05t0141000-00	antisense	genic	0	overlapping	exonic	Hypothetical conserved gene.
OS_LNC0953	Os05g0141000	Os05t0141000-00	antisense	genic	0	nested	exonic	Hypothetical conserved gene.
OS_LNC0993	Os05g0290300	Os05t0290300-00	sense	intergenic	2204	same_strand	upstream	Hypothetical conserved gene.
OS_LNC0994	Os05g0290300	Os05t0290300-00	sense	intergenic	2268	same_strand	upstream	Hypothetical conserved gene.
OS_LNC0995	Os05g0290300	Os05t0290300-00	sense	intergenic	4453	same_strand	upstream	Hypothetical conserved gene.
OS_LNC1001	Os01g0606133	Os01t0606133-00	antisense	intergenic	2110	convergent	downstream	Hypothetical conserved gene.
OS_LNC1040	Os05g0422600	Os05t0422600-00	antisense	intergenic	9198	divergent	upstream	Hypothetical conserved gene.
OS_LNC1050	Os05g0470650	Os05t0470650-01	sense	genic	0	containing	exonic	Hypothetical conserved gene.
OS_LNC1051	Os05g0470650	Os05t0470650-01	sense	genic	0	containing	exonic	Hypothetical conserved gene.
OS_LNC1052	Os05g0470650	Os05t0470650-01	sense	genic	0	containing	exonic	Hypothetical conserved gene.
OS_LNC1064	Os05g0498333	Os05t0498333-00	sense	intergenic	357	same_strand	upstream	Hypothetical conserved gene.
OS_LNC1066	Os05g0501200	Os05t0501200-00	antisense	intergenic	8073	convergent	downstream	Hypothetical conserved gene.
OS_LNC1071	Os05g0534800	Os05t0534800-01	antisense	genic	0	nested	exonic	Hypothetical conserved gene.
OS_LNC1073	Os05g0536000	Os05t0536000-01	sense	genic	0	overlapping	exonic	Hypothetical conserved gene.
OS_LNC1085	Os05g0587600	Os05t0587600-01	antisense	intergenic	5127	divergent	upstream	Hypothetical conserved gene.
OS_LNC1088	Os05g0592000	Os05t0592000-00	sense	intergenic	2517	same_strand	upstream	Hypothetical conserved gene.
OS_LNC1100	Os06g0127500	Os06t0127500-01	sense	intergenic	508	same_strand	downstream	Hypothetical conserved gene.
OS_LNC1103	Os06g0139200	Os06t0139200-01	sense	genic	0	containing	exonic	Hypothetical conserved gene.
OS_LNC1159	Os06g0295900	Os06t0295900-01	antisense	intergenic	2301	convergent	downstream	Hypothetical conserved gene.
OS_LNC1162	Os06g0303600	Os06t0303600-01	sense	genic	0	containing	exonic	Hypothetical conserved gene.
OS_LNC1163	Os06g0303600	Os06t0303600-01	sense	genic	0	containing	exonic	Hypothetical conserved gene.
OS_LNC1190	Os06g0343000	Os06t0343000-01	antisense	intergenic	4505	convergent	downstream	Hypothetical conserved gene.
OS_LNC1214	Os06g0483701	Os06t0483701-01	sense	genic	0	containing	exonic	Hypothetical conserved gene.
OS_LNC1221	Os06g0492800	Os06t0492800-00	sense	intergenic	7675	same_strand	upstream	Hypothetical conserved gene.
OS_LNC1241	Os06g0588450	Os06t0588450-00	sense	intergenic	13218	same_strand	downstream	Hypothetical conserved gene.
OS_LNC1256	Os06g0661700	Os06t0661700-01	antisense	intergenic	3015	divergent	upstream	Hypothetical conserved gene.
OS_LNC1256	Os06g0661766	Os06t0661766-00	sense	genic	0	nested	exonic	Hypothetical conserved gene.
OS_LNC1260	Os06g0681300	Os06t0681300-01	sense	intergenic	6689	same_strand	upstream	Hypothetical conserved gene.
OS_LNC1260	Os06g0682633	Os06t0682633-01	antisense	genic	0	containing	intronic	Hypothetical conserved gene.
OS_LNC1261	Os06g0681300	Os06t0681300-01	sense	intergenic	6689	same_strand	upstream	Hypothetical conserved gene.
OS_LNC1261	Os06g0682633	Os06t0682633-01	antisense	genic	0	containing	intronic	Hypothetical conserved gene.
OS_LNC1271	Os06g0710001	Os06t0710001-00	sense	genic	0	containing	exonic	Hypothetical conserved gene.
OS_LNC1272	Os06g0710001	Os06t0710001-00	antisense	intergenic	2411	divergent	upstream	Hypothetical conserved gene.
OS_LNC1273	Os06g0713900	Os06t0713900-01	sense	genic	0	containing	exonic	Hypothetical conserved gene.
OS_LNC1278	Os06g0720400	Os06t0720400-01	sense	intergenic	1868	same_strand	upstream	Hypothetical conserved gene.
OS_LNC1279	Os06g0720400	Os06t0720400-01	antisense	intergenic	4589	divergent	upstream	Hypothetical conserved gene.
OS_LNC1280	Os06g0720400	Os06t0720400-01	antisense	intergenic	4633	divergent	upstream	Hypothetical conserved gene.
OS_LNC1284	Os06g0722700	Os06t0722700-01	antisense	intergenic	796	convergent	downstream	Hypothetical conserved gene.
OS_LNC1293	Os07g0158400	Os07t0158400-00	sense	intergenic	4795	same_strand	downstream	Hypothetical conserved gene.
OS_LNC1307	Os01g0689900	Os01t0689900-04	sense	intergenic	9911	same_strand	upstream	Hypothetical conserved gene.
OS_LNC1307	Os01g0689900	Os01t0689900-03	sense	intergenic	8964	same_strand	upstream	Hypothetical conserved gene.
OS_LNC1307	Os01g0689900	Os01t0689900-02	sense	intergenic	1085	same_strand	upstream	Hypothetical conserved gene.
OS_LNC1307	Os01g0689900	Os01t0689900-01	sense	intergenic	1037	same_strand	upstream	Hypothetical conserved gene.
OS_LNC1313	Os07g0205200	Os07t0205200-01	sense	intergenic	1091	same_strand	downstream	Hypothetical conserved gene.
OS_LNC1314	Os07g0210000	Os07t0210000-01	antisense	genic	0	nested	exonic	Hypothetical conserved gene.
OS_LNC1315	Os07g0213500	Os07t0213500-01	sense	genic	0	containing	exonic	Hypothetical conserved gene.
OS_LNC1316	Os07g0223766	Os07t0223766-01	sense	intergenic	6857	same_strand	downstream	Hypothetical conserved gene.
OS_LNC1340	Os07g0299600	Os07t0299600-01	antisense	intergenic	19777	divergent	upstream	Hypothetical conserved gene.
OS_LNC1342	Os07g0417766	Os07t0417766-01	sense	intergenic	4304	same_strand	upstream	Hypothetical conserved gene.
OS_LNC1353	Os07g0458500	Os07t0458500-00	sense	genic	0	overlapping	exonic	Hypothetical conserved gene.
OS_LNC1386	Os07g0562900	Os07t0562900-00	sense	intergenic	4470	same_strand	downstream	Hypothetical conserved gene.
OS_LNC1405	Os07g0615900	Os07t0615900-02	antisense	intergenic	271	divergent	upstream	Hypothetical conserved gene.
OS_LNC1405	Os07g0615900	Os07t0615900-01	antisense	intergenic	239	divergent	upstream	Hypothetical conserved gene.
OS_LNC1439	Os08g0112000	Os08t0112000-00	sense	genic	0	containing	exonic	Hypothetical conserved gene.
OS_LNC1440	Os08g0112000	Os08t0112000-00	sense	genic	0	nested	exonic	Hypothetical conserved gene.
OS_LNC1441	Os08g0113800	Os08t0113800-01	antisense	intergenic	6532	convergent	downstream	Hypothetical conserved gene.
OS_LNC1447	Os08g0129800	Os08t0129800-02	sense	intergenic	512	same_strand	downstream	Hypothetical conserved gene.
OS_LNC1447	Os08g0129800	Os08t0129800-01	sense	intergenic	460	same_strand	downstream	Hypothetical conserved gene.
OS_LNC1448	Os08g0129800	Os08t0129800-02	antisense	intergenic	9559	convergent	downstream	Hypothetical conserved gene.
OS_LNC1448	Os08g0129800	Os08t0129800-01	antisense	intergenic	9507	convergent	downstream	Hypothetical conserved gene.
OS_LNC1471	Os08g0165601	Os08t0165601-00	sense	intergenic	3795	same_strand	downstream	Hypothetical conserved gene.
OS_LNC1487	Os08g0202300	Os08t0202300-02	antisense	intergenic	2863	divergent	upstream	Hypothetical conserved gene.
OS_LNC1487	Os08g0202300	Os08t0202300-01	antisense	intergenic	2862	divergent	upstream	Hypothetical conserved gene.
OS_LNC1501	Os08g0249400	Os08t0249400-01	antisense	intergenic	885	convergent	downstream	Hypothetical conserved gene.
OS_LNC1517	Os08g0292400	Os08t0292400-01	sense	genic	0	containing	exonic	Hypothetical conserved gene.
OS_LNC1607	Os08g0548700	Os08t0548700-01	sense	intergenic	985	same_strand	upstream	Hypothetical conserved gene.
OS_LNC1608	Os08g0548700	Os08t0548700-01	sense	genic	0	containing	exonic	Hypothetical conserved gene.
OS_LNC1616	Os09g0109150	Os09t0109150-00	sense	genic	0	overlapping	exonic	Hypothetical conserved gene.
OS_LNC1628	Os09g0135100	Os09t0135100-00	sense	genic	0	containing	exonic	Hypothetical conserved gene.
OS_LNC1629	Os09g0135100	Os09t0135100-00	sense	genic	0	overlapping	exonic	Hypothetical conserved gene.
OS_LNC1645	Os09g0279100	Os09t0279100-01	antisense	intergenic	8473	convergent	downstream	Hypothetical conserved gene.
OS_LNC1645	Os09g0278700	Os09t0278700-00	sense	intergenic	6647	same_strand	downstream	Hypothetical conserved gene.
OS_LNC1646	Os09g0279100	Os09t0279100-01	antisense	intergenic	9369	convergent	downstream	Hypothetical conserved gene.
OS_LNC1646	Os09g0278700	Os09t0278700-00	sense	intergenic	8608	same_strand	downstream	Hypothetical conserved gene.
OS_LNC1647	Os09g0279100	Os09t0279100-01	antisense	intergenic	9369	convergent	downstream	Hypothetical conserved gene.
OS_LNC1647	Os09g0278700	Os09t0278700-00	sense	intergenic	8608	same_strand	downstream	Hypothetical conserved gene.
OS_LNC1648	Os09g0279100	Os09t0279100-01	antisense	intergenic	9931	convergent	downstream	Hypothetical conserved gene.
OS_LNC1648	Os09g0278700	Os09t0278700-00	sense	intergenic	8608	same_strand	downstream	Hypothetical conserved gene.
OS_LNC1670	Os09g0362800	Os09t0362800-02	sense	intergenic	1909	same_strand	downstream	Hypothetical conserved gene.
OS_LNC1670	Os09g0362800	Os09t0362800-01	sense	intergenic	1828	same_strand	downstream	Hypothetical conserved gene.
OS_LNC1672	Os01g0778100	Os01t0778100-01	sense	intergenic	5140	same_strand	upstream	Hypothetical conserved gene.
OS_LNC1672	Os01g0777800	Os01t0777800-01	antisense	intergenic	1463	divergent	upstream	Hypothetical conserved gene.
OS_LNC1680	Os09g0416500	Os09t0416500-01	sense	genic	0	nested	exonic	Hypothetical conserved gene.
OS_LNC1681	Os01g0152951	Os01t0152951-00	sense	intergenic	4297	same_strand	upstream	Hypothetical conserved gene.
OS_LNC1683	Os09g0429350	Os09t0429350-01	sense	genic	0	overlapping	exonic	Hypothetical conserved gene.
OS_LNC1694	Os09g0460350	Os09t0460350-01	sense	genic	0	containing	intronic	Hypothetical conserved gene.
OS_LNC1719	Os09g0560400	Os09t0560400-01	sense	intergenic	5104	same_strand	downstream	Hypothetical conserved gene.
OS_LNC1720	Os09g0573200	Os09t0573200-02	sense	intergenic	8480	same_strand	upstream	Hypothetical conserved gene.
OS_LNC1721	Os09g0573200	Os09t0573200-03	antisense	intergenic	8504	divergent	upstream	Hypothetical conserved gene.
OS_LNC1721	Os09g0573200	Os09t0573200-02	antisense	intergenic	5327	divergent	upstream	Hypothetical conserved gene.
OS_LNC1722	Os09g0573200	Os09t0573200-03	antisense	intergenic	8504	divergent	upstream	Hypothetical conserved gene.
OS_LNC1722	Os09g0573200	Os09t0573200-02	antisense	intergenic	5327	divergent	upstream	Hypothetical conserved gene.
OS_LNC1725	Os01g0819700	Os01t0819700-01	sense	intergenic	2008	same_strand	upstream	Hypothetical conserved gene.
OS_LNC1726	Os01g0819700	Os01t0819700-01	sense	intergenic	2008	same_strand	upstream	Hypothetical conserved gene.
OS_LNC1746	Os01g0876650	Os01t0876650-00	sense	genic	0	containing	exonic	Hypothetical conserved gene.
OS_LNC1747	Os01g0877450	Os01t0877450-00	sense	intergenic	229	same_strand	upstream	Hypothetical conserved gene.
OS_LNC1753	Os01g0910300	Os01t0910300-01	antisense	genic	0	overlapping	exonic	Hypothetical conserved gene.
OS_LNC1754	Os01g0910300	Os01t0910300-01	sense	genic	0	overlapping	exonic	Hypothetical conserved gene.
OS_LNC1758	Os01g0923400	Os01t0923400-01	antisense	intergenic	6915	divergent	upstream	Hypothetical conserved gene.
OS_LNC1759	Os01g0923400	Os01t0923400-01	antisense	intergenic	6974	divergent	upstream	Hypothetical conserved gene.
OS_LNC1765	Os01g0943000	Os01t0943000-01	antisense	intergenic	3246	convergent	downstream	Hypothetical conserved gene.
OS_LNC1784	Os10g0119100	Os10t0119100-01	antisense	genic	0	containing	intronic	Hypothetical conserved gene.
OS_LNC1785	Os10g0119100	Os10t0119100-01	antisense	genic	0	containing	intronic	Hypothetical conserved gene.
OS_LNC1850	Os10g0406900	Os10t0406900-00	antisense	intergenic	1185	convergent	downstream	Hypothetical conserved gene.
OS_LNC1865	Os10g0458700	Os10t0458700-02	sense	intergenic	6767	same_strand	upstream	Hypothetical conserved gene.
OS_LNC1877	Os10g0491100	Os10t0491100-01	sense	genic	0	containing	exonic	Hypothetical conserved gene.
OS_LNC1898	Os10g0556200	Os10t0556200-01	antisense	intergenic	5910	divergent	upstream	Hypothetical conserved gene.
OS_LNC1925	Os11g0139700	Os11t0139700-01	sense	intergenic	438	same_strand	upstream	Hypothetical conserved gene.
OS_LNC0004	Os01g0210550	Os01t0210550-00	sense	intergenic	7884	same_strand	downstream	Hypothetical gene.
OS_LNC0026	Os11g0235300	Os11t0235300-01	sense	genic	0	containing	intronic	Hypothetical gene.
OS_LNC0048	Os11g0373711	Os11t0373711-01	sense	genic	0	containing	exonic	Hypothetical gene.
OS_LNC0055	Os11g0429433	Os11t0429433-00	antisense	intergenic	6419	convergent	downstream	Hypothetical gene.
OS_LNC0055	Os11g0429200	Os11t0429200-02	sense	genic	0	overlapping	exonic	Hypothetical gene.
OS_LNC0056	Os11g0429200	Os11t0429200-02	antisense	intergenic	4020	convergent	downstream	Hypothetical gene.
OS_LNC0056	Os11g0429433	Os11t0429433-00	sense	genic	0	containing	exonic	Hypothetical gene.
OS_LNC0071	Os01g0225700	Os01t0225700-01	antisense	intergenic	14054	convergent	downstream	Hypothetical gene.
OS_LNC0096	Os11g0559533	Os11t0559533-01	sense	genic	0	containing	exonic	Hypothetical gene.
OS_LNC0142	Os11g0697001	Os11t0697001-01	antisense	genic	0	nested	exonic	Hypothetical gene.
OS_LNC0143	Os11g0697001	Os11t0697001-01	antisense	genic	0	nested	exonic	Hypothetical gene.
OS_LNC0144	Os11g0697001	Os11t0697001-01	antisense	genic	0	nested	exonic	Hypothetical gene.
OS_LNC0145	Os11g0697001	Os11t0697001-01	antisense	genic	0	overlapping	exonic	Hypothetical gene.
OS_LNC0146	Os11g0697001	Os11t0697001-01	antisense	genic	0	overlapping	exonic	Hypothetical gene.
OS_LNC0162	Os12g0115150	Os12t0115150-00	antisense	intergenic	3303	convergent	downstream	Hypothetical gene.
OS_LNC0169	Os12g0132900	Os12t0132900-01	sense	genic	0	containing	exonic	Hypothetical gene.
OS_LNC0196	Os12g0203900	Os12t0203900-01	sense	genic	0	overlapping	exonic	Hypothetical gene.
OS_LNC0197	Os12g0203900	Os12t0203900-01	sense	intergenic	4000	same_strand	upstream	Hypothetical gene.
OS_LNC0201	Os12g0222650	Os12t0222650-01	sense	genic	0	containing	intronic	Hypothetical gene.
OS_LNC0202	Os12g0222650	Os12t0222650-01	antisense	intergenic	20	convergent	downstream	Hypothetical gene.
OS_LNC0308	Os02g0142450	Os02t0142450-01	sense	genic	0	containing	intronic	Hypothetical gene.
OS_LNC0308	Os02g0145000	Os02t0145000-02	antisense	genic	0	containing	intronic	Hypothetical gene.
OS_LNC0309	Os02g0142450	Os02t0142450-01	antisense	genic	0	nested	exonic	Hypothetical gene.
OS_LNC0332	Os02g0174500	Os02t0174500-01	antisense	genic	0	overlapping	exonic	Hypothetical gene.
OS_LNC0348	Os02g0211350	Os02t0211350-01	sense	intergenic	8509	same_strand	upstream	Hypothetical gene.
OS_LNC0355	Os02g0216700	Os02t0216700-01	sense	intergenic	2972	same_strand	downstream	Hypothetical gene.
OS_LNC0356	Os02g0216700	Os02t0216700-01	sense	genic	0	containing	exonic	Hypothetical gene.
OS_LNC0448	Os02g0590700	Os02t0590700-01	sense	intergenic	7027	same_strand	downstream	Hypothetical gene.
OS_LNC0449	Os02g0600066	Os02t0600066-01	antisense	intergenic	6881	convergent	downstream	Hypothetical gene.
OS_LNC0456	Os02g0628100	Os02t0628100-03	sense	genic	0	containing	exonic	Hypothetical gene.
OS_LNC0473	Os02g0699850	Os02t0699850-01	sense	genic	0	containing	exonic	Hypothetical gene.
OS_LNC0474	Os02g0699850	Os02t0699850-01	sense	genic	0	containing	exonic	Hypothetical gene.
OS_LNC0490	Os02g0767150	Os02t0767150-01	antisense	genic	0	nested	exonic	Hypothetical gene.
OS_LNC0517	Os02g0807600	Os02t0807600-01	sense	genic	0	containing	exonic	Hypothetical gene.
OS_LNC0518	Os02g0807600	Os02t0807600-01	sense	genic	0	overlapping	exonic	Hypothetical gene.
OS_LNC0519	Os02g0807600	Os02t0807600-01	sense	intergenic	5752	same_strand	downstream	Hypothetical gene.
OS_LNC0520	Os02g0807600	Os02t0807600-01	sense	intergenic	6251	same_strand	downstream	Hypothetical gene.
OS_LNC0521	Os02g0807600	Os02t0807600-01	sense	intergenic	6302	same_strand	downstream	Hypothetical gene.
OS_LNC0522	Os02g0807600	Os02t0807600-01	sense	intergenic	6217	same_strand	downstream	Hypothetical gene.
OS_LNC0540	Os02g0834100	Os02t0834100-01	sense	genic	0	containing	exonic	Hypothetical gene.
OS_LNC0541	Os02g0834100	Os02t0834100-01	sense	genic	0	containing	exonic	Hypothetical gene.
OS_LNC0549	Os03g0126825	Os03t0126825-01	antisense	intergenic	5467	convergent	downstream	Hypothetical gene.
OS_LNC0559	Os03g0177966	Os03t0177966-01	sense	genic	0	containing	exonic	Hypothetical gene.
OS_LNC0560	Os03g0177966	Os03t0177966-01	sense	genic	0	containing	exonic	Hypothetical gene.
OS_LNC0561	Os03g0177966	Os03t0177966-01	sense	intergenic	3142	same_strand	downstream	Hypothetical gene.
OS_LNC0562	Os03g0177966	Os03t0177966-01	sense	genic	0	containing	exonic	Hypothetical gene.
OS_LNC0563	Os03g0177966	Os03t0177966-01	sense	genic	0	containing	exonic	Hypothetical gene.
OS_LNC0564	Os03g0177966	Os03t0177966-01	sense	genic	0	containing	exonic	Hypothetical gene.
OS_LNC0565	Os03g0177966	Os03t0177966-01	sense	genic	0	containing	intronic	Hypothetical gene.
OS_LNC0566	Os03g0177966	Os03t0177966-01	sense	intergenic	2735	same_strand	downstream	Hypothetical gene.
OS_LNC0567	Os03g0177966	Os03t0177966-01	sense	intergenic	2735	same_strand	downstream	Hypothetical gene.
OS_LNC0568	Os03g0177966	Os03t0177966-01	sense	genic	0	containing	intronic	Hypothetical gene.
OS_LNC0570	Os03g0177966	Os03t0177966-01	sense	genic	0	containing	intronic	Hypothetical gene.
OS_LNC0572	Os03g0190400	Os03t0190400-01	antisense	intergenic	3862	convergent	downstream	Hypothetical gene.
OS_LNC0578	Os03g0197175	Os03t0197175-00	antisense	intergenic	2	convergent	downstream	Hypothetical gene.
OS_LNC0584	Os03g0217801	Os03t0217801-01	sense	intergenic	9029	same_strand	downstream	Hypothetical gene.
OS_LNC0585	Os03g0217801	Os03t0217801-01	sense	intergenic	9407	same_strand	downstream	Hypothetical gene.
OS_LNC0591	Os03g0223301	Os03t0223301-01	sense	intergenic	9068	same_strand	downstream	Hypothetical gene.
OS_LNC0598	Os01g0364000	Os01t0364000-02	sense	intergenic	3219	same_strand	upstream	Hypothetical gene.
OS_LNC0598	Os01g0364000	Os01t0364000-01	sense	intergenic	2695	same_strand	upstream	Hypothetical gene.
OS_LNC0625	Os03g0339150	Os03t0339150-01	antisense	genic	0	nested	exonic	Hypothetical gene.
OS_LNC0626	Os03g0339150	Os03t0339150-01	antisense	genic	0	nested	exonic	Hypothetical gene.
OS_LNC0628	Os03g0345901	Os03t0345901-00	antisense	genic	0	overlapping	exonic	Hypothetical gene.
OS_LNC0653	Os01g0387133	Os01t0387133-00	antisense	intergenic	10816	convergent	downstream	Hypothetical gene.
OS_LNC0669	Os03g0582900	Os03t0582900-01	sense	genic	0	containing	exonic	Hypothetical gene.
OS_LNC0670	Os03g0582900	Os03t0582900-01	sense	intergenic	4127	same_strand	downstream	Hypothetical gene.
OS_LNC0700	Os03g0668033	Os03t0668033-01	sense	intergenic	7658	same_strand	downstream	Hypothetical gene.
OS_LNC0723	Os03g0735400	Os03t0735400-01	sense	genic	0	containing	exonic	Hypothetical gene.
OS_LNC0725	Os01g0513500	Os01t0513500-01	sense	genic	0	containing	exonic	Hypothetical gene.
OS_LNC0815	Os04g0272700	Os04t0272700-05	antisense	intergenic	2110	divergent	upstream	Hypothetical gene.
OS_LNC0815	Os04g0272700	Os04t0272700-01	antisense	genic	0	overlapping	exonic	Hypothetical gene.
OS_LNC0816	Os04g0272700	Os04t0272700-05	antisense	intergenic	2110	divergent	upstream	Hypothetical gene.
OS_LNC0816	Os04g0272700	Os04t0272700-01	antisense	genic	0	overlapping	exonic	Hypothetical gene.
OS_LNC0817	Os04g0272700	Os04t0272700-05	antisense	intergenic	2170	divergent	upstream	Hypothetical gene.
OS_LNC0817	Os04g0272700	Os04t0272700-01	antisense	genic	0	overlapping	exonic	Hypothetical gene.
OS_LNC0839	Os04g0345100	Os04t0345100-01	sense	intergenic	7280	same_strand	upstream	Hypothetical gene.
OS_LNC0860	Os04g0411651	Os04t0411651-00	sense	intergenic	89	same_strand	upstream	Hypothetical gene.
OS_LNC0863	Os01g0556201	Os01t0556201-00	sense	intergenic	8248	same_strand	downstream	Hypothetical gene.
OS_LNC0875	Os01g0130100	Os01t0130100-01	antisense	intergenic	8268	convergent	downstream	Hypothetical gene.
OS_LNC0887	Os04g0539601	Os04t0539601-00	antisense	genic	0	containing	intronic	Hypothetical gene.
OS_LNC0907	Os04g0588500	Os04t0588500-01	antisense	genic	0	nested	exonic	Hypothetical gene.
OS_LNC0908	Os04g0588500	Os04t0588500-01	sense	intergenic	8828	same_strand	upstream	Hypothetical gene.
OS_LNC0917	Os04g0618100	Os04t0618100-01	antisense	genic	0	overlapping	exonic	Hypothetical gene.
OS_LNC0934	Os01g0584250	Os01t0584250-01	antisense	intergenic	1408	convergent	downstream	Hypothetical gene.
OS_LNC0965	Os05g0181650	Os05t0181650-00	sense	intergenic	4924	same_strand	upstream	Hypothetical gene.
OS_LNC0993	Os05g0290400	Os05t0290400-01	antisense	genic	0	nested	exonic	Hypothetical gene.
OS_LNC0994	Os05g0290400	Os05t0290400-01	antisense	genic	0	nested	exonic	Hypothetical gene.
OS_LNC0995	Os05g0290400	Os05t0290400-01	antisense	genic	0	nested	exonic	Hypothetical gene.
OS_LNC0996	Os05g0294800	Os05t0294800-01	sense	genic	0	containing	exonic	Hypothetical gene.
OS_LNC0997	Os05g0294800	Os05t0294800-01	sense	genic	0	containing	exonic	Hypothetical gene.
OS_LNC0998	Os05g0294800	Os05t0294800-01	sense	genic	0	containing	exonic	Hypothetical gene.
OS_LNC0999	Os05g0294800	Os05t0294800-01	sense	genic	0	containing	exonic	Hypothetical gene.
OS_LNC1000	Os05g0294800	Os05t0294800-01	sense	genic	0	containing	exonic	Hypothetical gene.
OS_LNC1073	Os05g0536101	Os05t0536101-01	sense	genic	0	containing	exonic	Hypothetical gene.
OS_LNC1077	Os05g0551801	Os05t0551801-01	sense	genic	0	overlapping	exonic	Hypothetical gene.
OS_LNC1079	Os05g0555450	Os05t0555450-00	antisense	genic	0	overlapping	exonic	Hypothetical gene.
OS_LNC1088	Os05g0591900	Os05t0591900-01	antisense	genic	0	overlapping	exonic	Hypothetical gene.
OS_LNC1088	Os05g0591900	Os05t0591900-06	antisense	genic	0	overlapping	exonic	Hypothetical gene.
OS_LNC1088	Os05g0591900	Os05t0591900-07	antisense	genic	0	overlapping	exonic	Hypothetical gene.
OS_LNC1088	Os05g0591900	Os05t0591900-05	antisense	genic	0	overlapping	exonic	Hypothetical gene.
OS_LNC1088	Os05g0591900	Os05t0591900-03	antisense	genic	0	overlapping	exonic	Hypothetical gene.
OS_LNC1110	Os06g0149450	Os06t0149450-00	sense	intergenic	7382	same_strand	downstream	Hypothetical gene.
OS_LNC1111	Os06g0149450	Os06t0149450-00	sense	intergenic	7357	same_strand	downstream	Hypothetical gene.
OS_LNC1112	Os06g0149450	Os06t0149450-00	sense	intergenic	4283	same_strand	downstream	Hypothetical gene.
OS_LNC1124	Os06g0184733	Os06t0184733-01	antisense	intergenic	8075	convergent	downstream	Hypothetical gene.
OS_LNC1177	Os06g0320801	Os06t0320801-01	antisense	genic	0	nested	exonic	Hypothetical gene.
OS_LNC1178	Os06g0320801	Os06t0320801-01	antisense	genic	0	nested	exonic	Hypothetical gene.
OS_LNC1191	Os06g0350200	Os06t0350200-01	antisense	intergenic	1761	divergent	upstream	Hypothetical gene.
OS_LNC1197	Os06g0365700	Os06t0365700-01	antisense	intergenic	26529	divergent	upstream	Hypothetical gene.
OS_LNC1198	Os06g0365700	Os06t0365700-01	antisense	intergenic	26559	divergent	upstream	Hypothetical gene.
OS_LNC1200	Os06g0473700	Os06t0473700-01	sense	intergenic	8037	same_strand	upstream	Hypothetical gene.
OS_LNC1202	Os06g0477400	Os06t0477400-01	antisense	intergenic	5852	convergent	downstream	Hypothetical gene.
OS_LNC1203	Os06g0477400	Os06t0477400-01	antisense	intergenic	5852	convergent	downstream	Hypothetical gene.
OS_LNC1204	Os06g0477400	Os06t0477400-01	antisense	intergenic	5852	convergent	downstream	Hypothetical gene.
OS_LNC1205	Os06g0477400	Os06t0477400-01	antisense	intergenic	5852	convergent	downstream	Hypothetical gene.
OS_LNC1206	Os06g0477400	Os06t0477400-01	antisense	intergenic	5852	convergent	downstream	Hypothetical gene.
OS_LNC1207	Os06g0477400	Os06t0477400-01	antisense	intergenic	5852	convergent	downstream	Hypothetical gene.
OS_LNC1215	Os06g0487380	Os06t0487380-01	antisense	intergenic	5614	convergent	downstream	Hypothetical gene.
OS_LNC1226	Os01g0661601	Os01t0661601-01	sense	intergenic	1712	same_strand	upstream	Hypothetical gene.
OS_LNC1260	Os06g0682666	Os06t0682666-01	antisense	intergenic	1040	divergent	upstream	Hypothetical gene.
OS_LNC1261	Os06g0682666	Os06t0682666-01	antisense	intergenic	1040	divergent	upstream	Hypothetical gene.
OS_LNC1275	Os06g0720100	Os06t0720100-00	antisense	genic	0	nested	exonic	Hypothetical gene.
OS_LNC1276	Os06g0720100	Os06t0720100-00	antisense	genic	0	nested	exonic	Hypothetical gene.
OS_LNC1277	Os06g0720100	Os06t0720100-00	antisense	genic	0	overlapping	exonic	Hypothetical gene.
OS_LNC1279	Os06g0720100	Os06t0720100-00	sense	intergenic	9140	same_strand	upstream	Hypothetical gene.
OS_LNC1280	Os06g0720100	Os06t0720100-00	sense	intergenic	9140	same_strand	upstream	Hypothetical gene.
OS_LNC1285	Os06g0731750	Os06t0731750-00	antisense	intergenic	8406	convergent	downstream	Hypothetical gene.
OS_LNC1286	Os06g0731750	Os06t0731750-00	antisense	intergenic	8406	convergent	downstream	Hypothetical gene.
OS_LNC1296	Os07g0166850	Os07t0166850-00	antisense	genic	0	containing	exonic	Hypothetical gene.
OS_LNC1297	Os07g0173850	Os07t0173850-00	antisense	intergenic	464	convergent	downstream	Hypothetical gene.
OS_LNC1330	Os07g0267300	Os07t0267300-01	sense	intergenic	729	same_strand	upstream	Hypothetical gene.
OS_LNC1358	Os07g0468900	Os07t0468900-01	sense	genic	0	containing	exonic	Hypothetical gene.
OS_LNC1363	Os07g0477866	Os07t0477866-01	sense	intergenic	9022	same_strand	downstream	Hypothetical gene.
OS_LNC1367	Os01g0144380	Os01t0144380-01	sense	intergenic	4958	same_strand	downstream	Hypothetical gene.
OS_LNC1378	Os07g0537250	Os07t0537250-01	sense	intergenic	5214	same_strand	downstream	Hypothetical gene.
OS_LNC1379	Os07g0537250	Os07t0537250-01	antisense	genic	0	nested	exonic	Hypothetical gene.
OS_LNC1391	Os07g0574400	Os07t0574400-01	sense	genic	0	containing	exonic	Hypothetical gene.
OS_LNC1486	Os08g0188151	Os08t0188151-00	antisense	intergenic	3021	divergent	upstream	Hypothetical gene.
OS_LNC1496	Os08g0232100	Os08t0232100-01	antisense	intergenic	4248	divergent	upstream	Hypothetical gene.
OS_LNC1497	Os08g0232100	Os08t0232100-01	sense	genic	0	overlapping	exonic	Hypothetical gene.
OS_LNC1519	Os08g0299801	Os08t0299801-01	sense	intergenic	9312	same_strand	downstream	Hypothetical gene.
OS_LNC1520	Os08g0299801	Os08t0299801-01	sense	intergenic	9312	same_strand	downstream	Hypothetical gene.
OS_LNC1521	Os08g0299801	Os08t0299801-01	sense	intergenic	9312	same_strand	downstream	Hypothetical gene.
OS_LNC1522	Os08g0300901	Os08t0300901-01	sense	genic	0	overlapping	exonic	Hypothetical gene.
OS_LNC1523	Os08g0300901	Os08t0300901-01	sense	intergenic	6869	same_strand	upstream	Hypothetical gene.
OS_LNC1540	Os08g0352400	Os08t0352400-01	sense	genic	0	containing	exonic	Hypothetical gene.
OS_LNC1541	Os08g0352400	Os08t0352400-01	antisense	intergenic	33373	divergent	upstream	Hypothetical gene.
OS_LNC1597	Os08g0535501	Os08t0535501-00	sense	intergenic	5819	same_strand	downstream	Hypothetical gene.
OS_LNC1598	Os08g0535501	Os08t0535501-00	antisense	intergenic	7109	convergent	downstream	Hypothetical gene.
OS_LNC1599	Os08g0535501	Os08t0535501-00	antisense	intergenic	8494	convergent	downstream	Hypothetical gene.
OS_LNC1607	Os08g0548650	Os08t0548650-00	antisense	genic	0	overlapping	exonic	Hypothetical gene.
OS_LNC1608	Os08g0548650	Os08t0548650-00	antisense	genic	0	overlapping	exonic	Hypothetical gene.
OS_LNC1650	Os01g0771350	Os01t0771350-01	antisense	intergenic	8065	divergent	upstream	Hypothetical gene.
OS_LNC1658	Os09g0337300	Os09t0337300-02	sense	intergenic	23318	same_strand	upstream	Hypothetical gene.
OS_LNC1658	Os09g0337300	Os09t0337300-01	sense	intergenic	23243	same_strand	upstream	Hypothetical gene.
OS_LNC1659	Os09g0337300	Os09t0337300-02	sense	intergenic	23318	same_strand	upstream	Hypothetical gene.
OS_LNC1659	Os09g0337300	Os09t0337300-01	sense	intergenic	23243	same_strand	upstream	Hypothetical gene.
OS_LNC1660	Os09g0337300	Os09t0337300-02	sense	intergenic	23370	same_strand	upstream	Hypothetical gene.
OS_LNC1660	Os09g0337300	Os09t0337300-01	sense	intergenic	23295	same_strand	upstream	Hypothetical gene.
OS_LNC1668	Os01g0777650	Os01t0777650-01	antisense	intergenic	2061	divergent	upstream	Hypothetical gene.
OS_LNC1668	Os01g0777450	Os01t0777450-01	antisense	genic	0	containing	intronic	Hypothetical gene.
OS_LNC1679	Os09g0407050	Os09t0407050-00	sense	intergenic	8559	same_strand	upstream	Hypothetical gene.
OS_LNC1694	Os09g0462301	Os09t0462301-01	sense	genic	0	containing	intronic	Hypothetical gene.
OS_LNC1694	Os09g0459450	Os09t0459450-01	antisense	genic	0	containing	intronic	Hypothetical gene.
OS_LNC1694	Os09g0464033	Os09t0464033-01	antisense	genic	0	containing	intronic	Hypothetical gene.
OS_LNC1694	Os09g0457833	Os09t0457833-01	sense	genic	0	containing	intronic	Hypothetical gene.
OS_LNC1694	Os09g0463232	Os09t0463232-00	sense	genic	0	containing	intronic	Hypothetical gene.
OS_LNC1695	Os09g0463232	Os09t0463232-00	antisense	intergenic	5581	divergent	upstream	Hypothetical gene.
OS_LNC1699	Os09g0491652	Os09t0491652-00	antisense	genic	0	overlapping	exonic	Hypothetical gene.
OS_LNC1700	Os09g0498000	Os09t0498000-01	sense	intergenic	361	same_strand	downstream	Hypothetical gene.
OS_LNC1701	Os09g0502950	Os09t0502950-00	antisense	genic	0	overlapping	exonic	Hypothetical gene.
OS_LNC1706	Os01g0795050	Os01t0795050-01	sense	genic	0	nested	intronic	Hypothetical gene.
OS_LNC1707	Os01g0795050	Os01t0795050-01	sense	intergenic	9041	same_strand	upstream	Hypothetical gene.
OS_LNC1712	Os09g0540000	Os09t0540000-01	sense	genic	0	containing	exonic	Hypothetical gene.
OS_LNC1712	Os09g0539901	Os09t0539901-00	sense	genic	0	containing	exonic	Hypothetical gene.
OS_LNC1723	Os01g0805975	Os01t0805975-01	antisense	intergenic	8208	divergent	upstream	Hypothetical gene.
OS_LNC1724	Os01g0810700	Os01t0810700-01	sense	intergenic	3310	same_strand	upstream	Hypothetical gene.
OS_LNC1731	Os01g0834250	Os01t0834250-01	sense	genic	0	overlapping	exonic	Hypothetical gene.
OS_LNC1739	Os01g0866133	Os01t0866133-00	antisense	genic	0	overlapping	exonic	Hypothetical gene.
OS_LNC1740	Os01g0866133	Os01t0866133-00	sense	genic	0	overlapping	exonic	Hypothetical gene.
OS_LNC1791	Os10g0161100	Os10t0161100-01	sense	intergenic	5108	same_strand	downstream	Hypothetical gene.
OS_LNC1800	Os10g0166300	Os10t0166300-01	antisense	intergenic	34134	convergent	downstream	Hypothetical gene.
OS_LNC1801	Os10g0166300	Os10t0166300-01	antisense	intergenic	34171	convergent	downstream	Hypothetical gene.
OS_LNC1802	Os10g0166300	Os10t0166300-01	antisense	intergenic	34136	convergent	downstream	Hypothetical gene.
OS_LNC1835	Os10g0365050	Os10t0365050-01	sense	intergenic	7487	same_strand	downstream	Hypothetical gene.
OS_LNC1857	Os10g0442532	Os10t0442532-00	antisense	genic	0	overlapping	exonic	Hypothetical gene.
OS_LNC1875	Os10g0488850	Os10t0488850-00	antisense	intergenic	3405	divergent	upstream	Hypothetical gene.
OS_LNC1880	Os01g0109201	Os01t0109201-01	antisense	intergenic	3636	divergent	upstream	Hypothetical gene.
OS_LNC1895	Os10g0541700	Os10t0541700-00	antisense	genic	0	overlapping	exonic	Hypothetical gene.
OS_LNC0059	Os11g0435301	Os11t0435301-00	antisense	genic	0	overlapping	exonic	Hypothetical genes.
OS_LNC0161	Os12g0106801	Os12t0106801-00	sense	intergenic	8273	same_strand	downstream	Hypothetical genes.
OS_LNC0254	Os12g0434801	Os12t0434801-00	antisense	genic	0	overlapping	exonic	Hypothetical genes.
OS_LNC0255	Os12g0434801	Os12t0434801-00	antisense	genic	0	overlapping	exonic	Hypothetical genes.
OS_LNC0256	Os12g0434801	Os12t0434801-00	antisense	genic	0	overlapping	exonic	Hypothetical genes.
OS_LNC0484	Os02g0749250	Os02t0749250-00	antisense	intergenic	9376	convergent	downstream	Hypothetical genes.
OS_LNC0004	Os01g0210750	Os01t0210750-00	sense	genic	0	containing	exonic	Hypothetical protein.
OS_LNC0038	Os11g0257800	Os11t0257800-02	sense	genic	0	containing	exonic	Hypothetical protein.
OS_LNC0095	Os11g0555866	Os11t0555866-00	sense	intergenic	3343	same_strand	upstream	Hypothetical protein.
OS_LNC0113	Os11g0619000	Os11t0619000-01	sense	intergenic	2470	same_strand	downstream	Hypothetical protein.
OS_LNC0134	Os11g0685200	Os11t0685200-01	sense	intergenic	6597	same_strand	downstream	Hypothetical protein.
OS_LNC0147	Os11g0708000	Os11t0708000-03	sense	genic	0	containing	exonic	Hypothetical protein.
OS_LNC0147	Os11g0708000	Os11t0708000-01	sense	genic	0	overlapping	exonic	Hypothetical protein.
OS_LNC0148	Os11g0708000	Os11t0708000-01	sense	genic	0	overlapping	exonic	Hypothetical protein.
OS_LNC0148	Os11g0708000	Os11t0708000-03	sense	genic	0	containing	exonic	Hypothetical protein.
OS_LNC0161	Os12g0106525	Os12t0106525-00	sense	genic	0	containing	exonic	Hypothetical protein.
OS_LNC0164	Os01g0239150	Os01t0239150-00	sense	intergenic	5173	same_strand	downstream	Hypothetical protein.
OS_LNC0201	Os12g0223000	Os12t0223000-01	sense	intergenic	1104	same_strand	downstream	Hypothetical protein.
OS_LNC0202	Os12g0223000	Os12t0223000-01	antisense	intergenic	9321	convergent	downstream	Hypothetical protein.
OS_LNC0203	Os12g0223000	Os12t0223000-01	antisense	intergenic	2087	divergent	upstream	Hypothetical protein.
OS_LNC0205	Os12g0228032	Os12t0228032-00	antisense	genic	0	containing	intronic	Hypothetical protein.
OS_LNC0290	Os12g0596501	Os12t0596501-00	antisense	intergenic	6300	convergent	downstream	Hypothetical protein.
OS_LNC0318	Os01g0115950	Os01t0115950-00	sense	intergenic	2594	same_strand	upstream	Hypothetical protein.
OS_LNC0320	Os02g0156500	Os02t0156500-01	sense	intergenic	1347	same_strand	upstream	Hypothetical protein.
OS_LNC0322	Os02g0163400	Os02t0163400-01	antisense	intergenic	226	convergent	downstream	Hypothetical protein.
OS_LNC0343	Os02g0199666	Os02t0199666-00	sense	intergenic	9588	same_strand	downstream	Hypothetical protein.
OS_LNC0347	Os02g0210600	Os02t0210600-01	sense	intergenic	9222	same_strand	downstream	Hypothetical protein.
OS_LNC0357	Os02g0218500	Os02t0218500-01	sense	intergenic	985	same_strand	upstream	Hypothetical protein.
OS_LNC0358	Os02g0218500	Os02t0218500-01	sense	intergenic	985	same_strand	upstream	Hypothetical protein.
OS_LNC0361	Os01g0116650	Os01t0116650-00	antisense	intergenic	629	divergent	upstream	Hypothetical protein.
OS_LNC0364	Os01g0290800	Os01t0290800-01	sense	genic	0	containing	exonic	Hypothetical protein.
OS_LNC0366	Os02g0234400	Os02t0234400-01	sense	genic	0	containing	exonic	Hypothetical protein.
OS_LNC0385	Os02g0298100	Os02t0298100-01	sense	genic	0	containing	exonic	Hypothetical protein.
OS_LNC0386	Os02g0298100	Os02t0298100-01	sense	genic	0	containing	exonic	Hypothetical protein.
OS_LNC0391	Os02g0319400	Os02t0319400-01	antisense	intergenic	5468	convergent	downstream	Hypothetical protein.
OS_LNC0416	Os02g0462500	Os02t0462500-01	sense	genic	0	overlapping	exonic	Hypothetical protein.
OS_LNC0452	Os02g0609500	Os02t0609500-01	sense	genic	0	containing	exonic	Hypothetical protein.
OS_LNC0464	Os02g0665600	Os02t0665600-01	antisense	intergenic	3229	convergent	downstream	Hypothetical protein.
OS_LNC0465	Os02g0665600	Os02t0665600-01	antisense	intergenic	2500	convergent	downstream	Hypothetical protein.
OS_LNC0473	Os02g0699836	Os02t0699836-00	sense	genic	0	containing	exonic	Hypothetical protein.
OS_LNC0474	Os02g0699836	Os02t0699836-00	sense	genic	0	containing	exonic	Hypothetical protein.
OS_LNC0479	Os02g0731800	Os02t0731800-00	antisense	intergenic	9741	divergent	upstream	Hypothetical protein.
OS_LNC0484	Os02g0749200	Os02t0749200-01	sense	intergenic	9632	same_strand	upstream	Hypothetical protein.
OS_LNC0484	Os02g0749400	Os02t0749400-01	sense	genic	0	containing	exonic	Hypothetical protein.
OS_LNC0491	Os02g0768100	Os02t0768100-01	antisense	intergenic	1235	divergent	upstream	Hypothetical protein.
OS_LNC0494	Os02g0787966	Os02t0787966-00	antisense	genic	0	overlapping	exonic	Hypothetical protein.
OS_LNC0496	Os02g0792000	Os02t0792000-01	sense	intergenic	5673	same_strand	downstream	Hypothetical protein.
OS_LNC0497	Os02g0792000	Os02t0792000-01	sense	intergenic	8134	same_strand	downstream	Hypothetical protein.
OS_LNC0498	Os02g0792000	Os02t0792000-01	sense	intergenic	8143	same_strand	downstream	Hypothetical protein.
OS_LNC0515	Os02g0803225	Os02t0803225-00	antisense	intergenic	4114	convergent	downstream	Hypothetical protein.
OS_LNC0516	Os02g0803225	Os02t0803225-00	antisense	intergenic	4055	convergent	downstream	Hypothetical protein.
OS_LNC0525	Os02g0815300	Os02t0815300-01	antisense	intergenic	7394	divergent	upstream	Hypothetical protein.
OS_LNC0531	Os02g0820100	Os02t0820100-00	antisense	intergenic	3483	convergent	downstream	Hypothetical protein.
OS_LNC0537	Os02g0828800	Os02t0828800-01	sense	genic	0	containing	exonic	Hypothetical protein.
OS_LNC0539	Os02g0831000	Os02t0831000-00	antisense	genic	0	overlapping	exonic	Hypothetical protein.
OS_LNC0586	Os03g0219450	Os03t0219450-00	sense	intergenic	359	same_strand	downstream	Hypothetical protein.
OS_LNC0587	Os03g0219450	Os03t0219450-00	sense	intergenic	359	same_strand	downstream	Hypothetical protein.
OS_LNC0599	Os03g0238000	Os03t0238000-01	antisense	genic	0	overlapping	exonic	Hypothetical protein.
OS_LNC0613	Os03g0321100	Os03t0321100-01	sense	intergenic	4155	same_strand	upstream	Hypothetical protein.
OS_LNC0627	Os03g0342850	Os03t0342850-01	antisense	intergenic	692	convergent	downstream	Hypothetical protein.
OS_LNC0680	Os03g0604700	Os03t0604700-01	antisense	genic	0	overlapping	exonic	Hypothetical protein.
OS_LNC0681	Os03g0604700	Os03t0604700-01	sense	intergenic	8188	same_strand	downstream	Hypothetical protein.
OS_LNC0691	Os03g0645250	Os03t0645250-00	antisense	genic	0	nested	exonic	Hypothetical protein.
OS_LNC0718	Os03g0718650	Os03t0718650-00	antisense	intergenic	760	divergent	upstream	Hypothetical protein.
OS_LNC0730	Os03g0757400	Os03t0757400-01	sense	genic	0	containing	exonic	Hypothetical protein.
OS_LNC0777	Os04g0165801	Os04t0165801-00	antisense	intergenic	9128	divergent	upstream	Hypothetical protein.
OS_LNC0780	Os04g0175000	Os04t0175000-01	sense	intergenic	3436	same_strand	downstream	Hypothetical protein.
OS_LNC0781	Os04g0175000	Os04t0175000-01	sense	genic	0	overlapping	exonic	Hypothetical protein.
OS_LNC0782	Os04g0175000	Os04t0175000-01	sense	intergenic	237	same_strand	upstream	Hypothetical protein.
OS_LNC0825	Os04g0293100	Os04t0293100-01	sense	intergenic	1186	same_strand	downstream	Hypothetical protein.
OS_LNC0851	Os01g0552050	Os01t0552050-00	antisense	intergenic	1044	convergent	downstream	Hypothetical protein.
OS_LNC0852	Os01g0552050	Os01t0552050-00	antisense	intergenic	1044	convergent	downstream	Hypothetical protein.
OS_LNC0860	Os04g0412000	Os04t0412000-01	sense	intergenic	7254	same_strand	upstream	Hypothetical protein.
OS_LNC0861	Os04g0412350	Os04t0412350-01	sense	genic	0	containing	exonic	Hypothetical protein.
OS_LNC0862	Os04g0412350	Os04t0412350-01	sense	genic	0	containing	exonic	Hypothetical protein.
OS_LNC0888	Os04g0540500	Os04t0540500-01	sense	genic	0	nested	exonic	Hypothetical protein.
OS_LNC0911	Os04g0603100	Os04t0603100-01	sense	intergenic	628	same_strand	upstream	Hypothetical protein.
OS_LNC0935	Os04g0692850	Os04t0692850-00	antisense	intergenic	1145	divergent	upstream	Hypothetical protein.
OS_LNC0936	Os04g0692850	Os04t0692850-00	antisense	genic	0	overlapping	exonic	Hypothetical protein.
OS_LNC0955	Os05g0147650	Os05t0147650-00	antisense	genic	0	overlapping	exonic	Hypothetical protein.
OS_LNC0956	Os05g0149251	Os05t0149251-00	sense	intergenic	1416	same_strand	upstream	Hypothetical protein.
OS_LNC0985	Os05g0266900	Os05t0266900-01	antisense	intergenic	4065	convergent	downstream	Hypothetical protein.
OS_LNC0986	Os05g0266900	Os05t0266900-01	antisense	intergenic	4116	convergent	downstream	Hypothetical protein.
OS_LNC1014	Os05g0336000	Os05t0336000-00	antisense	genic	0	overlapping	exonic	Hypothetical protein.
OS_LNC1030	Os05g0406300	Os05t0406300-00	antisense	intergenic	9501	divergent	upstream	Hypothetical protein.
OS_LNC1031	Os05g0406300	Os05t0406300-00	antisense	genic	0	nested	exonic	Hypothetical protein.
OS_LNC1032	Os05g0406300	Os05t0406300-00	antisense	genic	0	nested	exonic	Hypothetical protein.
OS_LNC1041	Os05g0429100	Os05t0429100-02	antisense	intergenic	4879	divergent	upstream	Hypothetical protein.
OS_LNC1043	Os05g0449100	Os05t0449100-01	sense	intergenic	791	same_strand	downstream	Hypothetical protein.
OS_LNC1044	Os05g0449100	Os05t0449100-01	sense	intergenic	791	same_strand	downstream	Hypothetical protein.
OS_LNC1045	Os05g0449100	Os05t0449100-01	sense	intergenic	809	same_strand	downstream	Hypothetical protein.
OS_LNC1046	Os05g0449100	Os05t0449100-01	sense	intergenic	1871	same_strand	downstream	Hypothetical protein.
OS_LNC1065	Os05g0498851	Os05t0498851-00	antisense	genic	0	overlapping	exonic	Hypothetical protein.
OS_LNC1093	Os01g0632700	Os01t0632700-02	antisense	intergenic	4694	divergent	upstream	Hypothetical protein.
OS_LNC1093	Os01g0632700	Os01t0632700-01	antisense	intergenic	4574	divergent	upstream	Hypothetical protein.
OS_LNC1096	Os01g0632700	Os01t0632700-01	sense	genic	0	nested	exonic	Hypothetical protein.
OS_LNC1096	Os01g0632700	Os01t0632700-02	sense	genic	0	containing	exonic	Hypothetical protein.
OS_LNC1097	Os06g0107750	Os06t0107750-00	antisense	intergenic	8181	convergent	downstream	Hypothetical protein.
OS_LNC1107	Os06g0143750	Os06t0143750-00	antisense	intergenic	3453	divergent	upstream	Hypothetical protein.
OS_LNC1108	Os06g0143750	Os06t0143750-00	antisense	intergenic	3453	divergent	upstream	Hypothetical protein.
OS_LNC1109	Os06g0143750	Os06t0143750-00	antisense	intergenic	2804	divergent	upstream	Hypothetical protein.
OS_LNC1110	Os06g0149300	Os06t0149300-01	sense	intergenic	4578	same_strand	downstream	Hypothetical protein.
OS_LNC1111	Os06g0149300	Os06t0149300-01	sense	intergenic	4553	same_strand	downstream	Hypothetical protein.
OS_LNC1112	Os06g0149300	Os06t0149300-01	sense	intergenic	1479	same_strand	downstream	Hypothetical protein.
OS_LNC1119	Os06g0178601	Os06t0178601-00	sense	genic	0	containing	exonic	Hypothetical protein.
OS_LNC1119	Os06g0176801	Os06t0176801-00	sense	genic	0	containing	exonic	Hypothetical protein.
OS_LNC1119	Os06g0178550	Os06t0178550-00	sense	genic	0	containing	intronic	Hypothetical protein.
OS_LNC1120	Os06g0178550	Os06t0178550-00	antisense	intergenic	1484	divergent	upstream	Hypothetical protein.
OS_LNC1120	Os06g0178601	Os06t0178601-00	antisense	genic	0	nested	exonic	Hypothetical protein.
OS_LNC1125	Os06g0187950	Os06t0187950-00	antisense	genic	0	nested	exonic	Hypothetical protein.
OS_LNC1143	Os06g0231350	Os06t0231350-00	sense	intergenic	9052	same_strand	upstream	Hypothetical protein.
OS_LNC1144	Os06g0231350	Os06t0231350-00	antisense	intergenic	7458	divergent	upstream	Hypothetical protein.
OS_LNC1155	Os06g0273400	Os06t0273400-01	sense	intergenic	4529	same_strand	upstream	Hypothetical protein.
OS_LNC1173	Os06g0312950	Os06t0312950-00	antisense	intergenic	3915	convergent	downstream	Hypothetical protein.
OS_LNC1188	Os06g0334600	Os06t0334600-01	antisense	intergenic	9323	divergent	upstream	Hypothetical protein.
OS_LNC1255	Os06g0656400	Os06t0656400-01	sense	genic	0	overlapping	exonic	Hypothetical protein.
OS_LNC1259	Os06g0673700	Os06t0673700-01	sense	intergenic	132	same_strand	downstream	Hypothetical protein.
OS_LNC1303	Os07g0187350	Os07t0187350-00	antisense	genic	0	overlapping	exonic	Hypothetical protein.
OS_LNC1354	Os07g0461950	Os07t0461950-00	antisense	intergenic	9445	convergent	downstream	Hypothetical protein.
OS_LNC1416	Os01g0719800	Os01t0719800-01	sense	intergenic	5869	same_strand	upstream	Hypothetical protein.
OS_LNC1422	Os07g0663000	Os07t0663000-00	antisense	intergenic	4899	divergent	upstream	Hypothetical protein.
OS_LNC1423	Os07g0665100	Os07t0665100-01	sense	genic	0	containing	exonic	Hypothetical protein.
OS_LNC1429	Os07g0680700	Os07t0680700-00	sense	intergenic	4539	same_strand	downstream	Hypothetical protein.
OS_LNC1429	Os07g0680800	Os07t0680800-00	antisense	genic	0	overlapping	exonic	Hypothetical protein.
OS_LNC1430	Os07g0684400	Os07t0684400-01	antisense	genic	0	overlapping	exonic	Hypothetical protein.
OS_LNC1431	Os07g0684400	Os07t0684400-01	antisense	genic	0	overlapping	exonic	Hypothetical protein.
OS_LNC1441	Os08g0113600	Os08t0113600-01	sense	intergenic	334	same_strand	upstream	Hypothetical protein.
OS_LNC1450	Os08g0132700	Os08t0132700-01	sense	genic	0	containing	exonic	Hypothetical protein.
OS_LNC1457	Os01g0728900	Os01t0728900-03	sense	intergenic	9534	same_strand	upstream	Hypothetical protein.
OS_LNC1457	Os01g0728900	Os01t0728900-02	sense	intergenic	9511	same_strand	upstream	Hypothetical protein.
OS_LNC1457	Os01g0728900	Os01t0728900-01	sense	intergenic	9509	same_strand	upstream	Hypothetical protein.
OS_LNC1458	Os01g0728900	Os01t0728900-03	sense	intergenic	9534	same_strand	upstream	Hypothetical protein.
OS_LNC1458	Os01g0728900	Os01t0728900-02	sense	intergenic	9511	same_strand	upstream	Hypothetical protein.
OS_LNC1458	Os01g0728900	Os01t0728900-01	sense	intergenic	9509	same_strand	upstream	Hypothetical protein.
OS_LNC1459	Os01g0728900	Os01t0728900-03	sense	intergenic	9534	same_strand	upstream	Hypothetical protein.
OS_LNC1459	Os01g0728900	Os01t0728900-02	sense	intergenic	9511	same_strand	upstream	Hypothetical protein.
OS_LNC1459	Os01g0728900	Os01t0728900-01	sense	intergenic	9509	same_strand	upstream	Hypothetical protein.
OS_LNC1460	Os01g0728900	Os01t0728900-03	sense	intergenic	9534	same_strand	upstream	Hypothetical protein.
OS_LNC1460	Os01g0728900	Os01t0728900-02	sense	intergenic	9511	same_strand	upstream	Hypothetical protein.
OS_LNC1460	Os01g0728900	Os01t0728900-01	sense	intergenic	9509	same_strand	upstream	Hypothetical protein.
OS_LNC1461	Os01g0728900	Os01t0728900-03	sense	intergenic	9534	same_strand	upstream	Hypothetical protein.
OS_LNC1461	Os01g0728900	Os01t0728900-02	sense	intergenic	9511	same_strand	upstream	Hypothetical protein.
OS_LNC1461	Os01g0728900	Os01t0728900-01	sense	intergenic	9509	same_strand	upstream	Hypothetical protein.
OS_LNC1462	Os01g0728900	Os01t0728900-03	sense	intergenic	9534	same_strand	upstream	Hypothetical protein.
OS_LNC1462	Os01g0728900	Os01t0728900-02	sense	intergenic	9511	same_strand	upstream	Hypothetical protein.
OS_LNC1462	Os01g0728900	Os01t0728900-01	sense	intergenic	9509	same_strand	upstream	Hypothetical protein.
OS_LNC1463	Os08g0152366	Os08t0152366-00	sense	intergenic	936	same_strand	upstream	Hypothetical protein.
OS_LNC1471	Os08g0165800	Os08t0165800-00	sense	genic	0	overlapping	exonic	Hypothetical protein.
OS_LNC1483	Os08g0184300	Os08t0184300-01	sense	genic	0	containing	exonic	Hypothetical protein.
OS_LNC1484	Os08g0184300	Os08t0184300-01	antisense	genic	0	overlapping	intronic	Hypothetical protein.
OS_LNC1494	Os08g0231100	Os08t0231100-01	sense	intergenic	2749	same_strand	downstream	Hypothetical protein.
OS_LNC1495	Os08g0231100	Os08t0231100-01	sense	intergenic	2846	same_strand	downstream	Hypothetical protein.
OS_LNC1499	Os08g0246950	Os08t0246950-00	antisense	intergenic	3159	convergent	downstream	Hypothetical protein.
OS_LNC1561	Os08g0429225	Os08t0429225-00	antisense	genic	0	overlapping	exonic	Hypothetical protein.
OS_LNC1583	Os08g0507701	Os08t0507701-01	antisense	intergenic	786	convergent	downstream	Hypothetical protein.
OS_LNC1584	Os08g0507701	Os08t0507701-01	antisense	intergenic	13	convergent	downstream	Hypothetical protein.
OS_LNC1585	Os08g0507701	Os08t0507701-01	antisense	intergenic	5183	convergent	downstream	Hypothetical protein.
OS_LNC1586	Os08g0507701	Os08t0507701-01	antisense	intergenic	13	convergent	downstream	Hypothetical protein.
OS_LNC1587	Os08g0507701	Os08t0507701-01	antisense	genic	0	overlapping	exonic	Hypothetical protein.
OS_LNC1591	Os08g0520700	Os08t0520700-01	sense	intergenic	159	same_strand	downstream	Hypothetical protein.
OS_LNC1592	Os08g0520700	Os08t0520700-01	sense	intergenic	720	same_strand	downstream	Hypothetical protein.
OS_LNC1600	Os08g0536400	Os08t0536400-01	sense	genic	0	containing	exonic	Hypothetical protein.
OS_LNC1601	Os08g0536400	Os08t0536400-01	sense	genic	0	containing	exonic	Hypothetical protein.
OS_LNC1624	Os09g0130901	Os09t0130901-01	antisense	intergenic	2175	convergent	downstream	Hypothetical protein.
OS_LNC1625	Os09g0130901	Os09t0130901-01	antisense	intergenic	2378	convergent	downstream	Hypothetical protein.
OS_LNC1650	Os01g0771300	Os01t0771300-01	sense	intergenic	2030	same_strand	downstream	Hypothetical protein.
OS_LNC1679	Os09g0406900	Os09t0406900-01	sense	intergenic	805	same_strand	upstream	Hypothetical protein.
OS_LNC1694	Os09g0462000	Os09t0462000-01	sense	genic	0	containing	intronic	Hypothetical protein.
OS_LNC1694	Os09g0457700	Os09t0457700-01	sense	genic	0	containing	intronic	Hypothetical protein.
OS_LNC1694	Os09g0464066	Os09t0464066-00	antisense	genic	0	containing	intronic	Hypothetical protein.
OS_LNC1694	Os09g0458600	Os09t0458600-01	sense	genic	0	containing	intronic	Hypothetical protein.
OS_LNC1696	Os09g0468850	Os09t0468850-00	antisense	intergenic	4125	divergent	upstream	Hypothetical protein.
OS_LNC1700	Os09g0498200	Os09t0498200-01	antisense	intergenic	728	convergent	downstream	Hypothetical protein.
OS_LNC1704	Os09g0520000	Os09t0520000-01	sense	genic	0	containing	exonic	Hypothetical protein.
OS_LNC1705	Os09g0520000	Os09t0520000-01	sense	genic	0	overlapping	exonic	Hypothetical protein.
OS_LNC1708	Os09g0530350	Os09t0530350-00	sense	intergenic	5817	same_strand	downstream	Hypothetical protein.
OS_LNC1709	Os09g0530350	Os09t0530350-00	sense	intergenic	5817	same_strand	downstream	Hypothetical protein.
OS_LNC1732	Os01g0838300	Os01t0838300-01	sense	genic	0	containing	exonic	Hypothetical protein.
OS_LNC1747	Os01g0877600	Os01t0877600-01	sense	genic	0	nested	exonic	Hypothetical protein.
OS_LNC1753	Os01g0910200	Os01t0910200-01	sense	genic	0	containing	exonic	Hypothetical protein.
OS_LNC1754	Os01g0910200	Os01t0910200-01	antisense	intergenic	664	divergent	upstream	Hypothetical protein.
OS_LNC1761	Os01g0933075	Os01t0933075-01	antisense	intergenic	491	divergent	upstream	Hypothetical protein.
OS_LNC1762	Os01g0933075	Os01t0933075-01	antisense	intergenic	4057	divergent	upstream	Hypothetical protein.
OS_LNC1763	Os01g0933075	Os01t0933075-01	antisense	intergenic	4057	divergent	upstream	Hypothetical protein.
OS_LNC1764	Os01g0933075	Os01t0933075-01	antisense	intergenic	4728	divergent	upstream	Hypothetical protein.
OS_LNC1772	Os01g0967600	Os01t0967600-01	antisense	intergenic	997	divergent	upstream	Hypothetical protein.
OS_LNC1773	Os01g0967600	Os01t0967600-01	antisense	intergenic	1148	divergent	upstream	Hypothetical protein.
OS_LNC1774	Os01g0967600	Os01t0967600-01	antisense	intergenic	997	divergent	upstream	Hypothetical protein.
OS_LNC1775	Os01g0967600	Os01t0967600-01	antisense	intergenic	8072	divergent	upstream	Hypothetical protein.
OS_LNC1776	Os01g0967600	Os01t0967600-01	antisense	intergenic	1148	divergent	upstream	Hypothetical protein.
OS_LNC1777	Os01g0967600	Os01t0967600-01	antisense	intergenic	1148	divergent	upstream	Hypothetical protein.
OS_LNC1778	Os01g0967600	Os01t0967600-01	antisense	intergenic	2399	divergent	upstream	Hypothetical protein.
OS_LNC1779	Os01g0967600	Os01t0967600-01	sense	intergenic	2482	same_strand	downstream	Hypothetical protein.
OS_LNC1818	Os10g0207101	Os10t0207101-00	sense	intergenic	9073	same_strand	downstream	Hypothetical protein.
OS_LNC1836	Os10g0368200	Os10t0368200-01	sense	genic	0	containing	intronic	Hypothetical protein.
OS_LNC1889	Os10g0529600	Os10t0529600-01	sense	intergenic	1908	same_strand	upstream	Hypothetical protein.
OS_LNC1899	Os10g0558850	Os10t0558850-00	antisense	intergenic	12	convergent	downstream	Hypothetical protein.
OS_LNC1900	Os10g0558850	Os10t0558850-00	antisense	genic	0	containing	intronic	Hypothetical protein.
OS_LNC1901	Os10g0559300	Os10t0559300-01	antisense	intergenic	3180	divergent	upstream	Hypothetical protein.
OS_LNC1902	Os10g0559300	Os10t0559300-01	antisense	intergenic	3215	divergent	upstream	Hypothetical protein.
OS_LNC1903	Os10g0567200	Os10t0567200-01	antisense	intergenic	1554	divergent	upstream	Hypothetical protein.
OS_LNC1921	Os11g0115375	Os11t0115375-00	antisense	intergenic	2525	divergent	upstream	Hypothetical protein.
OS_LNC1230	Os06g0555500	Os06t0555500-01	antisense	intergenic	6868	convergent	downstream	Initiator tRNA phosphoribosyl transferase family protein.
OS_LNC1231	Os06g0555500	Os06t0555500-01	sense	intergenic	6490	same_strand	downstream	Initiator tRNA phosphoribosyl transferase family protein.
OS_LNC1887	Os10g0521300	Os10t0521300-01	sense	genic	0	overlapping	exonic	Inner membrane protein OXA1-like, mitochondrial precursor.
OS_LNC1113	Os06g0150500	Os06t0150500-01	antisense	intergenic	8774	convergent	downstream	Inorganic pyrophosphatase domain containing protein.
OS_LNC0649	Os03g0425200	Os03t0425200-01	antisense	intergenic	904	convergent	downstream	Inosine/uridine-preferring nucleoside hydrolase domain containing protein.
OS_LNC0649	Os03g0425200	Os03t0425200-02	antisense	intergenic	901	convergent	downstream	Inosine/uridine-preferring nucleoside hydrolase domain containing protein.
OS_LNC0650	Os03g0425200	Os03t0425200-01	antisense	intergenic	905	convergent	downstream	Inosine/uridine-preferring nucleoside hydrolase domain containing protein.
OS_LNC0650	Os03g0425200	Os03t0425200-02	antisense	intergenic	902	convergent	downstream	Inosine/uridine-preferring nucleoside hydrolase domain containing protein.
OS_LNC1030	Os05g0406100	Os05t0406100-03	sense	intergenic	2944	same_strand	upstream	Inosine/uridine-preferring nucleoside hydrolase domain containing protein.
OS_LNC1030	Os05g0406100	Os05t0406100-02	sense	intergenic	704	same_strand	upstream	Inosine/uridine-preferring nucleoside hydrolase domain containing protein.
OS_LNC1030	Os05g0406100	Os05t0406100-01	sense	intergenic	317	same_strand	upstream	Inosine/uridine-preferring nucleoside hydrolase domain containing protein.
OS_LNC1385	Os07g0558200	Os07t0558200-02	antisense	genic	0	containing	intronic	Inositol monophosphatase family protein.
OS_LNC1385	Os07g0558500	Os07t0558500-01	antisense	intergenic	1791	convergent	downstream	Inositol phosphatase-like protein.
OS_LNC1385	Os07g0558500	Os07t0558500-02	antisense	intergenic	1667	convergent	downstream	Inositol phosphatase-like protein.
OS_LNC0431	Os02g0523800	Os02t0523800-01	sense	intergenic	3021	same_strand	downstream	Inositol polyphosphate kinase family protein.
OS_LNC1399	Os07g0588000	Os07t0588000-01	antisense	intergenic	826	convergent	downstream	Interferon-related developmental regulator domain containing protein.
OS_LNC1089	Os05g0594500	Os05t0594500-02	sense	intergenic	4097	same_strand	upstream	Invasin/intimin cell-adhesion domain containing protein.
OS_LNC1089	Os05g0594500	Os05t0594500-01	sense	intergenic	2225	same_strand	upstream	Invasin/intimin cell-adhesion domain containing protein.
OS_LNC1090	Os05g0594500	Os05t0594500-02	sense	intergenic	4279	same_strand	upstream	Invasin/intimin cell-adhesion domain containing protein.
OS_LNC1090	Os05g0594500	Os05t0594500-01	sense	intergenic	2407	same_strand	upstream	Invasin/intimin cell-adhesion domain containing protein.
OS_LNC0332	Os02g0175000	Os02t0175000-01	antisense	intergenic	9692	divergent	upstream	Ion transporter , Na+ transport
OS_LNC1073	Os05g0535900	Os05t0535900-01	sense	intergenic	1274	same_strand	downstream	IQ calmodulin-binding region domain containing protein.
OS_LNC1119	Os06g0176700	Os06t0176700-01	antisense	intergenic	973	convergent	downstream	Isopenicillin N synthase family protein.
OS_LNC1119	Os06g0178500	Os06t0178500-01	antisense	genic	0	containing	intronic	Isopenicillin N synthase family protein.
OS_LNC1120	Os06g0178500	Os06t0178500-01	sense	intergenic	1194	same_strand	downstream	Isopenicillin N synthase family protein.
OS_LNC1055	Os05g0481500	Os05t0481500-01	sense	genic	0	nested	exonic	K Homology domain containing protein.
OS_LNC1055	Os05g0481500	Os05t0481500-02	sense	genic	0	containing	exonic	K Homology domain containing protein.
OS_LNC1748	Os01g0886300	Os01t0886300-01	antisense	intergenic	4179	convergent	downstream	K Homology domain containing protein.
OS_LNC1748	Os01g0886300	Os01t0886300-03	antisense	intergenic	4177	convergent	downstream	K Homology domain containing protein.
OS_LNC1879	Os10g0497500	Os10t0497500-01	sense	intergenic	876	same_strand	downstream	K Homology, type 1, subgroup domain containing protein.
OS_LNC0130	Os11g0657000	Os11t0657000-01	sense	intergenic	7382	same_strand	downstream	Kelch repeat type 2 domain containing protein.
OS_LNC1851	Os10g0409900	Os10t0409900-02	antisense	intergenic	7499	divergent	upstream	Kelch-type beta propeller domain containing protein.
OS_LNC1851	Os10g0409900	Os10t0409900-01	antisense	intergenic	5401	divergent	upstream	Kelch-type beta propeller domain containing protein.
OS_LNC1852	Os10g0409900	Os10t0409900-02	antisense	intergenic	7583	divergent	upstream	Kelch-type beta propeller domain containing protein.
OS_LNC1852	Os10g0409900	Os10t0409900-01	antisense	intergenic	5485	divergent	upstream	Kelch-type beta propeller domain containing protein.
OS_LNC1699	Os09g0491692	Os09t0491692-01	sense	intergenic	6548	same_strand	downstream	Lambda repressor-like, DNA-binding domain containing protein.
OS_LNC0367	Os02g0250600	Os02t0250600-01	antisense	intergenic	247	divergent	upstream	Late embryogenesis abundant protein repeat containing protein.
OS_LNC0368	Os02g0250600	Os02t0250600-01	antisense	intergenic	255	divergent	upstream	Late embryogenesis abundant protein repeat containing protein.
OS_LNC0369	Os02g0250600	Os02t0250600-01	antisense	intergenic	255	divergent	upstream	Late embryogenesis abundant protein repeat containing protein.
OS_LNC0370	Os02g0250600	Os02t0250600-01	antisense	intergenic	267	divergent	upstream	Late embryogenesis abundant protein repeat containing protein.
OS_LNC0371	Os02g0250600	Os02t0250600-01	antisense	intergenic	267	divergent	upstream	Late embryogenesis abundant protein repeat containing protein.
OS_LNC0372	Os02g0250600	Os02t0250600-01	antisense	intergenic	307	divergent	upstream	Late embryogenesis abundant protein repeat containing protein.
OS_LNC0373	Os02g0250600	Os02t0250600-01	antisense	intergenic	6199	divergent	upstream	Late embryogenesis abundant protein repeat containing protein.
OS_LNC1097	Os06g0107700	Os06t0107700-01	sense	intergenic	8161	same_strand	upstream	Leaf-type ferredoxin-NADP+-oxidoreductase, Regulation of electron partitioning in the chloroplast
OS_LNC1287	Os07g0100900	Os07t0100900-01	sense	intergenic	7986	same_strand	upstream	Legume lectin, beta domain containing protein.
OS_LNC1288	Os07g0100900	Os07t0100900-01	sense	intergenic	7986	same_strand	upstream	Legume lectin, beta domain containing protein.
OS_LNC0487	Os02g0759700	Os02t0759700-04	sense	intergenic	5719	same_strand	upstream	Leucine-rich repeat 2 containing protein.
OS_LNC0487	Os02g0759700	Os02t0759700-02	sense	intergenic	4093	same_strand	upstream	Leucine-rich repeat 2 containing protein.
OS_LNC0487	Os02g0759700	Os02t0759700-01	sense	intergenic	3367	same_strand	upstream	Leucine-rich repeat 2 containing protein.
OS_LNC0488	Os02g0759700	Os02t0759700-02	sense	intergenic	9414	same_strand	downstream	Leucine-rich repeat 2 containing protein.
OS_LNC0488	Os02g0759700	Os02t0759700-01	sense	intergenic	9370	same_strand	downstream	Leucine-rich repeat 2 containing protein.
OS_LNC0488	Os02g0759700	Os02t0759700-04	sense	intergenic	8879	same_strand	downstream	Leucine-rich repeat 2 containing protein.
OS_LNC0320	Os02g0156200	Os02t0156200-00	antisense	intergenic	4646	divergent	upstream	Leucine-rich repeat domain containing protein.
OS_LNC0880	Os04g0503500	Os04t0503500-01	sense	intergenic	4101	same_strand	downstream	Leucine-rich repeat, cysteine-containing subtype containing protein.
OS_LNC0201	Os12g0222900	Os12t0222900-01	antisense	genic	0	overlapping	exonic	Leucine-rich repeat, N-terminal domain containing protein.
OS_LNC0201	Os12g0222800	Os12t0222800-00	antisense	genic	0	containing	exonic	Leucine-rich repeat, N-terminal domain containing protein.
OS_LNC0202	Os12g0222900	Os12t0222900-01	sense	intergenic	7351	same_strand	upstream	Leucine-rich repeat, N-terminal domain containing protein.
OS_LNC0202	Os12g0222800	Os12t0222800-00	sense	intergenic	3805	same_strand	upstream	Leucine-rich repeat, N-terminal domain containing protein.
OS_LNC0203	Os12g0222800	Os12t0222800-00	sense	intergenic	6802	same_strand	downstream	Leucine-rich repeat, N-terminal domain containing protein.
OS_LNC0203	Os12g0222900	Os12t0222900-01	sense	intergenic	2958	same_strand	downstream	Leucine-rich repeat, N-terminal domain containing protein.
OS_LNC0320	Os02g0156400	Os02t0156400-01	antisense	intergenic	22	convergent	downstream	Leucine-rich repeat, N-terminal domain containing protein.
OS_LNC0933	Os04g0672600	Os04t0672600-01	antisense	intergenic	6269	divergent	upstream	Leucine-rich repeat, N-terminal domain containing protein.
OS_LNC1749	Os01g0892300	Os01t0892300-01	sense	intergenic	3533	same_strand	upstream	Leucine-rich repeat, plant specific containing protein.
OS_LNC0362	Os02g0230100	Os02t0230100-01	antisense	intergenic	1765	divergent	upstream	Leucine-rich repeat, SDS22 containing protein.
OS_LNC0363	Os02g0230100	Os02t0230100-01	sense	intergenic	3901	same_strand	downstream	Leucine-rich repeat, SDS22 containing protein.
OS_LNC0842	Os04g0349700	Os04t0349700-01	antisense	genic	0	overlapping	exonic	Leucine-rich repeat, typical subtype containing protein.
OS_LNC1067	Os05g0501600	Os05t0501600-01	sense	intergenic	2317	same_strand	downstream	Leucine-rich repeat, typical subtype containing protein.
OS_LNC1909	Os10g0572300	Os10t0572300-02	sense	intergenic	7337	same_strand	upstream	Leucine-rich repeat, typical subtype containing protein.
OS_LNC1909	Os10g0572300	Os10t0572300-01	sense	intergenic	6883	same_strand	upstream	Leucine-rich repeat, typical subtype containing protein.
OS_LNC1910	Os10g0572300	Os10t0572300-02	sense	intergenic	4195	same_strand	upstream	Leucine-rich repeat, typical subtype containing protein.
OS_LNC1910	Os10g0572300	Os10t0572300-01	sense	intergenic	3741	same_strand	upstream	Leucine-rich repeat, typical subtype containing protein.
OS_LNC1911	Os10g0572300	Os10t0572300-02	sense	intergenic	4199	same_strand	upstream	Leucine-rich repeat, typical subtype containing protein.
OS_LNC1911	Os10g0572300	Os10t0572300-01	sense	intergenic	3745	same_strand	upstream	Leucine-rich repeat, typical subtype containing protein.
OS_LNC1912	Os10g0572300	Os10t0572300-02	antisense	intergenic	3627	convergent	downstream	Leucine-rich repeat, typical subtype containing protein.
OS_LNC1912	Os10g0572300	Os10t0572300-01	antisense	intergenic	2264	convergent	downstream	Leucine-rich repeat, typical subtype containing protein.
OS_LNC1701	Os09g0503400	Os09t0503400-01	sense	intergenic	6882	same_strand	upstream	Leucyl-tRNA synthetase, class Ia, archaeal/eukaryotic cytosolic domain containing protein.
OS_LNC0420	Os01g0305200	Os01t0305200-01	sense	genic	0	overlapping	exonic	Lg106-like family protein.
OS_LNC0719	Os01g0102900	Os01t0102900-01	antisense	genic	0	overlapping	exonic	Light-regulated protein, Regulation of light-dependent attachment of LEAF-TYPE FERREDOXIN-NADP+ OXIDOREDUCTASE to the thylakoid membrane
OS_LNC0720	Os01g0102900	Os01t0102900-01	antisense	genic	0	overlapping	exonic	Light-regulated protein, Regulation of light-dependent attachment of LEAF-TYPE FERREDOXIN-NADP+ OXIDOREDUCTASE to the thylakoid membrane
OS_LNC0721	Os01g0102900	Os01t0102900-01	antisense	genic	0	overlapping	exonic	Light-regulated protein, Regulation of light-dependent attachment of LEAF-TYPE FERREDOXIN-NADP+ OXIDOREDUCTASE to the thylakoid membrane
OS_LNC0028	Os01g0111200	Os01t0111200-01	sense	intergenic	1623	same_strand	downstream	Like-Sm ribonucleoprotein-related domain domain containing protein.
OS_LNC0128	Os11g0655800	Os11t0655800-01	sense	intergenic	3933	same_strand	upstream	Lipase, class 3 family protein.
OS_LNC0129	Os11g0655800	Os11t0655800-01	antisense	intergenic	9606	convergent	downstream	Lipase, class 3 family protein.
OS_LNC0063	Os01g0223200	Os01t0223200-01	antisense	intergenic	5471	convergent	downstream	Lipase, GDSL domain containing protein.
OS_LNC0063	Os01g0223000	Os01t0223000-01	antisense	genic	0	nested	exonic	Lipase, GDSL domain containing protein.
OS_LNC1694	Os09g0460500	Os09t0460500-00	antisense	genic	0	containing	intronic	Lipase, GDXG, active site domain containing protein.
OS_LNC1921	Os11g0115400	Os11t0115400-00	sense	intergenic	2040	same_strand	downstream	Lipid transfer protein LPT IV.
OS_LNC1101	Os06g0128200	Os06t0128200-01	sense	intergenic	5804	same_strand	downstream	LMBR1-like conserved region domain containing protein.
OS_LNC0451	Os02g0605600	Os02t0605600-01	antisense	intergenic	6366	divergent	upstream	LUC7 related family protein.
OS_LNC1757	Os01g0922800	Os01t0922800-01	sense	intergenic	7588	same_strand	downstream	MADS-box transcription factor, Short-day flowering promoter
OS_LNC0169	Os12g0132800	Os12t0132800-01	antisense	intergenic	5388	divergent	upstream	Major facilitator superfamily antiporter.
OS_LNC0169	Os12g0133100	Os12t0133100-02	antisense	intergenic	6499	convergent	downstream	Major facilitator superfamily protein.
OS_LNC1781	Os01g0974000	Os01t0974000-02	antisense	intergenic	3709	convergent	downstream	Mammalian cell entry related domain containing protein.
OS_LNC1781	Os01g0974000	Os01t0974000-01	antisense	intergenic	3705	convergent	downstream	Mammalian cell entry related domain containing protein.
OS_LNC0596	Os03g0226400	Os03t0226400-01	antisense	intergenic	1928	divergent	upstream	Manganese transporter, Cation diffusion facilitator family member, Mn tolerance
OS_LNC0597	Os03g0226400	Os03t0226400-01	antisense	intergenic	1928	divergent	upstream	Manganese transporter, Cation diffusion facilitator family member, Mn tolerance
OS_LNC0278	Os12g0498700	Os12t0498700-01	sense	intergenic	952	same_strand	upstream	Mannosyltransferase, PIG-V family protein.
OS_LNC0651	Os03g0426800	Os03t0426800-01	sense	genic	0	nested	exonic	Membrane-anchored ubiquitin-fold protein, HCG-1 domain containing protein.
OS_LNC1332	Os07g0274100	Os07t0274100-02	antisense	intergenic	701	convergent	downstream	Metallophosphoesterase domain containing protein.
OS_LNC1199	Os06g0472000	Os06t0472000-01	antisense	intergenic	18562	convergent	downstream	Methionine sulphoxide reductase B domain containing protein.
OS_LNC0932	Os04g0669800	Os04t0669800-01	antisense	genic	0	overlapping	exonic	Methylthioribose kinase.
OS_LNC0291	Os12g0612500	Os12t0612500-01	antisense	intergenic	3382	divergent	upstream	Methyltransferase small domain containing protein.
OS_LNC1756	Os01g0920300	Os01t0920300-02	antisense	intergenic	5629	divergent	upstream	Methyltransferase small domain containing protein.
OS_LNC1756	Os01g0920300	Os01t0920300-01	antisense	intergenic	4407	divergent	upstream	Methyltransferase small domain containing protein.
OS_LNC1875	Os10g0489100	Os10t0489100-01	sense	intergenic	612	same_strand	upstream	Methyltransferase type 12 domain containing protein.
OS_LNC1188	Os06g0335101	Os06t0335101-01	sense	genic	0	containing	exonic	Micro-fibrillar-associated 1, C-terminal domain containing protein.
OS_LNC1509	Os08g0278900	Os08t0278900-01	sense	intergenic	6566	same_strand	downstream	MIR domain containing protein.
OS_LNC1510	Os08g0278900	Os08t0278900-01	antisense	intergenic	5086	convergent	downstream	MIR domain containing protein.
OS_LNC0734	Os03g0785200	Os03t0785200-01	antisense	intergenic	8721	convergent	downstream	Mitochodrial transcription termination factor-related family protein.
OS_LNC1141	Os06g0224900	Os06t0224900-02	sense	intergenic	3958	same_strand	upstream	Mitochodrial transcription termination factor-related family protein.
OS_LNC1141	Os06g0225200	Os06t0225200-01	antisense	intergenic	3742	divergent	upstream	Mitochodrial transcription termination factor-related family protein.
OS_LNC1141	Os06g0225100	Os06t0225100-01	sense	intergenic	647	same_strand	downstream	Mitochodrial transcription termination factor-related family protein.
OS_LNC1588	Os08g0515800	Os08t0515800-01	sense	intergenic	853	same_strand	downstream	Mitochodrial transcription termination factor-related family protein.
OS_LNC1589	Os08g0515800	Os08t0515800-01	sense	intergenic	1551	same_strand	downstream	Mitochodrial transcription termination factor-related family protein.
OS_LNC0683	Os03g0606200	Os03t0606200-01	sense	genic	0	containing	exonic	Mitochondrial ATP synthase 6 KD subunit.
OS_LNC1338	Os07g0295000	Os07t0295000-01	sense	genic	0	nested	exonic	Mitochondrial carrier protein domain containing protein.
OS_LNC1925	Os11g0139900	Os11t0139900-00	sense	genic	0	overlapping	exonic	Mitochondrial glycoprotein domain containing protein.
OS_LNC1650	Os01g0771100	Os01t0771100-01	sense	intergenic	3150	same_strand	upstream	Mitochondrial glycoprotein family protein.
OS_LNC0848	Os04g0376100	Os04t0376100-01	sense	genic	0	containing	exonic	Mitochondrial import inner membrane translocase, subunit Tim17/22 family protein.
OS_LNC0464	Os02g0665200	Os02t0665200-01	sense	intergenic	8310	same_strand	downstream	Mitochondrial substrate carrier family protein.
OS_LNC0555	Os03g0160100	Os03t0160100-01	sense	intergenic	3753	same_strand	upstream	Mitogen-activated protein kinase kinase kinase, Disease resistance, Defense/stress response
OS_LNC1549	Os08g0390000	Os08t0390000-02	antisense	intergenic	6216	divergent	upstream	Moesin domain containing protein.
OS_LNC1549	Os08g0390000	Os08t0390000-01	antisense	intergenic	6192	divergent	upstream	Moesin domain containing protein.
OS_LNC0590	Os03g0222700	Os03t0222700-01	sense	intergenic	5829	same_strand	downstream	Molecular chaperone, heat shock protein, Hsp40, DnaJ domain containing protein.
OS_LNC1760	Os01g0927400	Os01t0927400-01	sense	intergenic	9993	same_strand	downstream	Molecular chaperone, heat shock protein, Hsp40, DnaJ domain containing protein.
OS_LNC0690	Os01g0499300	Os01t0499300-01	sense	intergenic	7254	same_strand	upstream	Mov34/MPN/PAD-1 family protein.
OS_LNC1226	Os01g0661500	Os01t0661500-01	sense	genic	0	containing	exonic	Mov34/MPN/PAD-1 family protein.
OS_LNC0091	Os01g0228300	Os01t0228300-01	sense	genic	0	containing	exonic	Mpv17/PMP22 family protein.
OS_LNC0121	Os11g0632200	Os11t0632200-01	sense	genic	0	overlapping	exonic	Myb/SANT-like domain domain containing protein.
OS_LNC0199	Os12g0207200	Os12t0207200-01	antisense	intergenic	1865	divergent	upstream	Myb/SANT-like domain domain containing protein.
OS_LNC0200	Os12g0207200	Os12t0207200-01	antisense	intergenic	2031	divergent	upstream	Myb/SANT-like domain domain containing protein.
OS_LNC1782	Os01g0975300	Os01t0975300-02	sense	intergenic	8617	same_strand	downstream	MYB-related transcription factor, Drought and salinity tolerance
OS_LNC1782	Os01g0975300	Os01t0975300-01	sense	intergenic	8608	same_strand	downstream	MYB-related transcription factor, Drought and salinity tolerance
OS_LNC1875	Os10g0488800	Os10t0488800-02	sense	intergenic	6299	same_strand	downstream	Myosin head, motor region domain containing protein.
OS_LNC0366	Os02g0234500	Os02t0234500-03	antisense	intergenic	4857	divergent	upstream	NAD(P)-binding domain containing protein.
OS_LNC0366	Os02g0234500	Os02t0234500-02	antisense	intergenic	3599	divergent	upstream	NAD(P)-binding domain containing protein.
OS_LNC0366	Os02g0234500	Os02t0234500-01	antisense	intergenic	2460	divergent	upstream	NAD(P)-binding domain containing protein.
OS_LNC0475	Os02g0701900	Os02t0701900-01	sense	genic	0	overlapping	exonic	NAD(P)-binding domain containing protein.
OS_LNC0476	Os02g0715200	Os02t0715200-01	sense	intergenic	3665	same_strand	downstream	NAD(P)-binding domain containing protein.
OS_LNC0476	Os02g0715200	Os02t0715200-02	sense	intergenic	2789	same_strand	downstream	NAD(P)-binding domain containing protein.
OS_LNC1033	Os01g0614900	Os01t0614900-02	sense	intergenic	9701	same_strand	downstream	NAD(P)-binding domain containing protein.
OS_LNC1034	Os01g0614900	Os01t0614900-02	sense	intergenic	9701	same_strand	downstream	NAD(P)-binding domain containing protein.
OS_LNC1447	Os08g0129700	Os08t0129700-01	sense	intergenic	5231	same_strand	downstream	NAD(P)-binding domain containing protein.
OS_LNC1447	Os08g0129700	Os08t0129700-02	sense	intergenic	5202	same_strand	downstream	NAD(P)-binding domain containing protein.
OS_LNC1713	Os01g0796400	Os01t0796400-02	antisense	intergenic	114	convergent	downstream	NAD(P)-binding domain containing protein.
OS_LNC1713	Os01g0796400	Os01t0796400-01	antisense	intergenic	114	convergent	downstream	NAD(P)-binding domain containing protein.
OS_LNC1700	Os09g0498500	Os09t0498500-00	antisense	intergenic	5003	convergent	downstream	NAD-binding site containing protein.
OS_LNC0671	Os03g0590700	Os03t0590700-01	antisense	intergenic	14561	divergent	upstream	NADH dehydrogenase [ubiquinone] 1 alpha subcomplex assembly factor 3 domain containing protein.
OS_LNC0672	Os03g0590700	Os03t0590700-01	antisense	intergenic	14708	divergent	upstream	NADH dehydrogenase [ubiquinone] 1 alpha subcomplex assembly factor 3 domain containing protein.
OS_LNC1416	Os01g0720300	Os01t0720300-00	sense	genic	0	nested	exonic	NADH-ubiquinone oxidoreductase 20 kDa subunit, mitochondrial precursor.
OS_LNC1563	Os08g0431500	Os08t0431500-01	sense	intergenic	6510	same_strand	downstream	NADH-ubiquinone oxidoreductase, 21kDa subunit, N-terminal domain containing protein.
OS_LNC1563	Os08g0431500	Os08t0431500-02	sense	intergenic	6455	same_strand	downstream	NADH-ubiquinone oxidoreductase, 21kDa subunit, N-terminal domain containing protein.
OS_LNC0001	Os11g0161100	Os11t0161100-01	antisense	intergenic	7212	divergent	upstream	NB-ARC domain containing protein.
OS_LNC0001	Os11g0161000	Os11t0161000-01	antisense	genic	0	overlapping	exonic	NB-ARC domain containing protein.
OS_LNC0014	Os11g0207400	Os11t0207400-01	sense	intergenic	19328	same_strand	downstream	NB-ARC domain containing protein.
OS_LNC0107	Os11g0590700	Os11t0590700-01	sense	intergenic	3939	same_strand	downstream	NB-ARC domain containing protein.
OS_LNC0257	Os12g0438300	Os12t0438300-01	antisense	intergenic	497	divergent	upstream	NB-ARC domain containing protein.
OS_LNC0258	Os12g0438300	Os12t0438300-01	antisense	intergenic	1041	divergent	upstream	NB-ARC domain containing protein.
OS_LNC0375	Os02g0272900	Os02t0272900-01	sense	intergenic	9059	same_strand	downstream	NB-ARC domain containing protein.
OS_LNC0576	Os01g0359400	Os01t0359400-03	sense	intergenic	8868	same_strand	downstream	NB-ARC domain containing protein.
OS_LNC0577	Os01g0359400	Os01t0359400-03	sense	intergenic	8872	same_strand	downstream	NB-ARC domain containing protein.
OS_LNC1007	Os05g0310600	Os05t0310600-01	antisense	intergenic	3295	divergent	upstream	NC domain containing protein.
OS_LNC1008	Os05g0310600	Os05t0310600-01	antisense	intergenic	3304	divergent	upstream	NC domain containing protein.
OS_LNC1009	Os05g0310600	Os05t0310600-01	antisense	intergenic	3328	divergent	upstream	NC domain containing protein.
OS_LNC1434	Os07g0689600	Os07t0689600-01	sense	intergenic	4050	same_strand	downstream	Nicotianamine synthase 3.
OS_LNC1698	Os09g0481800	Os09t0481800-01	sense	genic	0	containing	exonic	Nitrogen-fixing NifU, C-terminal domain containing protein.
OS_LNC0352	Os02g0214500	Os02t0214500-01	antisense	intergenic	141	convergent	downstream	No apical meristem protein domain containing protein.
OS_LNC0353	Os02g0214500	Os02t0214500-01	antisense	intergenic	207	convergent	downstream	No apical meristem protein domain containing protein.
OS_LNC0354	Os02g0214500	Os02t0214500-01	antisense	intergenic	272	convergent	downstream	No apical meristem protein domain containing protein.
OS_LNC1833	Os10g0359500	Os10t0359500-01	sense	intergenic	1661	same_strand	downstream	No apical meristem protein domain containing protein.
OS_LNC1918	Os11g0107400	Os11t0107400-01	antisense	genic	0	overlapping	exonic	Nodulin-like domain containing protein.
OS_LNC0504	Os02g0797700	Os02t0797700-01	antisense	intergenic	6370	divergent	upstream	Nonaspanin family protein.
OS_LNC1236	Os06g0568000	Os06t0568000-01	sense	intergenic	16967	same_strand	downstream	Nonaspanin family protein.
OS_LNC1783	Os10g0112600	Os10t0112600-01	sense	intergenic	6481	same_strand	upstream	Nonaspanin family protein.
OS_LNC0308	Os02g0145500	Os02t0145500-02	antisense	genic	0	containing	intronic	Non-protein coding transcript.
OS_LNC0313	Os02g0145500	Os02t0145500-02	antisense	intergenic	1112	divergent	upstream	Non-protein coding transcript.
OS_LNC0355	Os02g0216500	Os02t0216500-02	sense	genic	0	nested	exonic	Non-protein coding transcript.
OS_LNC0356	Os02g0216500	Os02t0216500-02	sense	intergenic	705	same_strand	upstream	Non-protein coding transcript.
OS_LNC0909	Os04g0596500	Os04t0596500-02	sense	genic	0	overlapping	exonic	Non-protein coding transcript.
OS_LNC0910	Os04g0596500	Os04t0596500-02	sense	genic	0	nested	exonic	Non-protein coding transcript.
OS_LNC1428	Os07g0676200	Os07t0676200-02	sense	genic	0	nested	exonic	Non-protein coding transcript.
OS_LNC1626	Os09g0134900	Os09t0134900-02	sense	genic	0	containing	exonic	Non-protein coding transcript.
OS_LNC1627	Os09g0134900	Os09t0134900-02	sense	genic	0	containing	exonic	Non-protein coding transcript.
OS_LNC0162	Os12g0115100	Os12t0115100-00	sense	intergenic	3218	same_strand	upstream	Nonspecific lipid-transfer protein 1 precursor.
OS_LNC0243	Os12g0299700	Os12t0299700-01	sense	intergenic	8911	same_strand	downstream	NOP5, N-terminal domain containing protein.
OS_LNC0244	Os12g0299700	Os12t0299700-01	sense	intergenic	13906	same_strand	downstream	NOP5, N-terminal domain containing protein.
OS_LNC0881	Os04g0515400	Os04t0515400-00	sense	genic	0	containing	exonic	NTP pyrophosphohydrolase MazG, putative catalytic core domain containing protein.
OS_LNC0640	Os03g0377500	Os03t0377500-02	sense	intergenic	2440	same_strand	downstream	Nuclear control of ATP synthase 2 domain containing protein.
OS_LNC0640	Os03g0377500	Os03t0377500-01	sense	intergenic	2428	same_strand	downstream	Nuclear control of ATP synthase 2 domain containing protein.
OS_LNC1573	Os01g0754100	Os01t0754100-01	antisense	intergenic	10	convergent	downstream	Nucleic acid-binding, OB-fold domain containing protein.
OS_LNC1574	Os01g0754100	Os01t0754100-01	antisense	intergenic	24	convergent	downstream	Nucleic acid-binding, OB-fold domain containing protein.
OS_LNC1575	Os01g0754100	Os01t0754100-01	antisense	intergenic	10	convergent	downstream	Nucleic acid-binding, OB-fold domain containing protein.
OS_LNC1576	Os01g0754100	Os01t0754100-01	antisense	intergenic	28	convergent	downstream	Nucleic acid-binding, OB-fold domain containing protein.
OS_LNC0918	Os04g0620700	Os04t0620700-01	sense	intergenic	8264	same_strand	downstream	Nucleolin-like protein, Salt stress response
OS_LNC0918	Os04g0620700	Os04t0620700-02	sense	intergenic	8213	same_strand	downstream	Nucleolin-like protein, Salt stress response
OS_LNC1390	Os07g0573600	Os07t0573600-01	sense	genic	0	nested	exonic	Nucleotide excision repair, TFIIH, subunit TTDA domain containing protein.
OS_LNC0391	Os02g0319100	Os02t0319100-01	sense	intergenic	268	same_strand	downstream	Nucleotide-binding, alpha-beta plait domain containing protein.
OS_LNC0398	Os02g0326200	Os02t0326200-00	antisense	intergenic	9436	divergent	upstream	Nucleotide-binding, alpha-beta plait domain containing protein.
OS_LNC0432	Os02g0536400	Os02t0536400-01	sense	intergenic	7804	same_strand	upstream	Nucleotide-binding, alpha-beta plait domain containing protein.
OS_LNC0607	Os03g0278800	Os03t0278800-00	sense	intergenic	9125	same_strand	downstream	Nucleotide-binding, alpha-beta plait domain containing protein.
OS_LNC0741	Os03g0801800	Os03t0801800-01	sense	intergenic	5067	same_strand	downstream	Nucleotide-binding, alpha-beta plait domain containing protein.
OS_LNC0938	Os05g0105900	Os05t0105900-01	sense	intergenic	3546	same_strand	upstream	Nucleotide-binding, alpha-beta plait domain containing protein.
OS_LNC0939	Os05g0105900	Os05t0105900-01	sense	intergenic	3546	same_strand	upstream	Nucleotide-binding, alpha-beta plait domain containing protein.
OS_LNC1033	Os01g0614500	Os01t0614500-01	sense	genic	0	overlapping	exonic	Nucleotide-binding, alpha-beta plait domain containing protein.
OS_LNC1034	Os01g0614500	Os01t0614500-01	sense	genic	0	overlapping	exonic	Nucleotide-binding, alpha-beta plait domain containing protein.
OS_LNC1409	Os07g0631900	Os07t0631900-01	antisense	genic	0	nested	exonic	Nucleotide-binding, alpha-beta plait domain containing protein.
OS_LNC1564	Os08g0436000	Os08t0436000-02	antisense	intergenic	1855	convergent	downstream	Nucleotide-binding, alpha-beta plait domain containing protein.
OS_LNC1564	Os08g0436000	Os08t0436000-01	antisense	intergenic	1849	convergent	downstream	Nucleotide-binding, alpha-beta plait domain containing protein.
OS_LNC1746	Os01g0876500	Os01t0876500-01	antisense	intergenic	2898	convergent	downstream	Nucleotide-binding, alpha-beta plait domain containing protein.
OS_LNC1746	Os01g0876500	Os01t0876500-02	antisense	intergenic	663	convergent	downstream	Nucleotide-binding, alpha-beta plait domain containing protein.
OS_LNC1863	Os10g0457000	Os10t0457000-02	sense	intergenic	2832	same_strand	upstream	Nucleotide-binding, alpha-beta plait domain containing protein.
OS_LNC1863	Os10g0457000	Os10t0457000-01	sense	intergenic	1234	same_strand	upstream	Nucleotide-binding, alpha-beta plait domain containing protein.
OS_LNC1804	Os10g0170000	Os10t0170000-01	sense	intergenic	5696	same_strand	downstream	Nucleotide-sensitive chloride conductance regulator family protein.
OS_LNC1390	Os07g0573700	Os07t0573700-01	sense	intergenic	378	same_strand	downstream	Nucleotide-sugar transporter family protein.
OS_LNC0260	Os12g0441600	Os12t0441600-00	antisense	intergenic	2137	convergent	downstream	O-methyltransferase, family 2 domain containing protein.
OS_LNC1694	Os09g0458400	Os09t0458400-01	antisense	genic	0	containing	intronic	Ortholog of Arabidopsis thaliana cotyledon chloroplast biogenesis factor AtCYO1, Accumulation and/or assembly of photosystem I, Regulation and/or maintenance of photosynthetic electron transport
OS_LNC1694	Os09g0458400	Os09t0458400-02	antisense	genic	0	containing	intronic	Ortholog of Arabidopsis thaliana cotyledon chloroplast biogenesis factor AtCYO1, Accumulation and/or assembly of photosystem I, Regulation and/or maintenance of photosynthetic electron transport
OS_LNC1074	Os01g0625900	Os01t0625900-01	sense	intergenic	7118	same_strand	upstream	Ovate Family Protein, Hormonal homeostasis, Vasculature development
OS_LNC0606	Os03g0274000	Os03t0274000-01	sense	intergenic	2113	same_strand	downstream	Oxysterol-binding protein family protein.
OS_LNC1086	Os05g0588700	Os05t0588700-01	antisense	intergenic	478	divergent	upstream	Paired amphipathic helix domain containing protein.
OS_LNC1890	Os01g0109750	Os01t0109750-01	sense	genic	0	nested	exonic	Paired amphipathic helix domain containing protein.
OS_LNC1919	Os11g0114700	Os11t0114700-04	sense	genic	0	nested	exonic	PAP/25A core domain containing protein.
OS_LNC1920	Os11g0114700	Os11t0114700-04	antisense	intergenic	2590	divergent	upstream	PAP/25A core domain containing protein.
OS_LNC0886	Os04g0534400	Os04t0534400-01	antisense	intergenic	161	convergent	downstream	PapD-like domain containing protein.
OS_LNC1467	Os08g0155100	Os08t0155100-01	antisense	intergenic	822	divergent	upstream	PapD-like domain containing protein.
OS_LNC1123	Os06g0181700	Os06t0181700-01	antisense	intergenic	5747	divergent	upstream	Pathogenesis-related transcriptional factor and ERF domain containing protein.
OS_LNC0697	Os03g0661800	Os03t0661800-01	antisense	intergenic	6481	convergent	downstream	PDZ/DHR/GLGF domain containing protein.
OS_LNC1688	Os09g0436700	Os09t0436700-01	antisense	intergenic	4814	convergent	downstream	PDZ/DHR/GLGF domain containing protein.
OS_LNC1689	Os09g0436700	Os09t0436700-01	antisense	intergenic	4814	convergent	downstream	PDZ/DHR/GLGF domain containing protein.
OS_LNC1850	Os10g0407000	Os10t0407000-01	sense	intergenic	227	same_strand	downstream	Pectin lyase fold/virulence factor domain containing protein.
OS_LNC0064	Os11g0463700	Os11t0463700-01	sense	genic	0	containing	exonic	Penicillin-binding protein, transpeptidase fold domain containing protein.
OS_LNC0041	Os11g0275400	Os11t0275400-01	sense	intergenic	8339	same_strand	upstream	Pentatricopeptide repeat domain containing protein.
OS_LNC0091	Os01g0228400	Os01t0228400-01	antisense	intergenic	2862	divergent	upstream	Pentatricopeptide repeat domain containing protein.
OS_LNC0109	Os11g0607100	Os11t0607100-01	sense	intergenic	789	same_strand	downstream	Pentatricopeptide repeat domain containing protein.
OS_LNC0299	Os02g0119700	Os02t0119700-01	antisense	intergenic	4555	convergent	downstream	Pentatricopeptide repeat domain containing protein.
OS_LNC0389	Os01g0299200	Os01t0299200-00	sense	intergenic	9501	same_strand	downstream	Pentatricopeptide repeat domain containing protein.
OS_LNC0421	Os02g0470000	Os02t0470000-01	antisense	intergenic	5647	divergent	upstream	Pentatricopeptide repeat domain containing protein.
OS_LNC0479	Os02g0730900	Os02t0730900-00	sense	intergenic	9708	same_strand	upstream	Pentatricopeptide repeat domain containing protein.
OS_LNC0538	Os02g0830000	Os02t0830000-01	antisense	intergenic	5560	convergent	downstream	Pentatricopeptide repeat domain containing protein.
OS_LNC0555	Os03g0159700	Os03t0159700-01	sense	intergenic	7150	same_strand	downstream	Pentatricopeptide repeat domain containing protein.
OS_LNC0558	Os03g0169300	Os03t0169300-01	sense	intergenic	854	same_strand	downstream	Pentatricopeptide repeat domain containing protein.
OS_LNC0608	Os03g0283500	Os03t0283500-01	sense	intergenic	325	same_strand	downstream	Pentatricopeptide repeat domain containing protein.
OS_LNC0754	Os03g0844000	Os03t0844000-02	antisense	intergenic	2751	divergent	upstream	Pentatricopeptide repeat domain containing protein.
OS_LNC0792	Os04g0218100	Os04t0218100-02	sense	genic	0	containing	intronic	Pentatricopeptide repeat domain containing protein.
OS_LNC0842	Os04g0349600	Os04t0349600-01	sense	intergenic	5922	same_strand	downstream	Pentatricopeptide repeat domain containing protein.
OS_LNC0865	Os04g0414800	Os04t0414800-00	antisense	intergenic	5761	convergent	downstream	Pentatricopeptide repeat domain containing protein.
OS_LNC0866	Os04g0414800	Os04t0414800-00	antisense	intergenic	8514	convergent	downstream	Pentatricopeptide repeat domain containing protein.
OS_LNC0925	Os04g0643700	Os04t0643700-02	sense	intergenic	4238	same_strand	upstream	Pentatricopeptide repeat domain containing protein.
OS_LNC0926	Os04g0643700	Os04t0643700-02	sense	intergenic	4238	same_strand	upstream	Pentatricopeptide repeat domain containing protein.
OS_LNC0927	Os04g0643700	Os04t0643700-02	sense	intergenic	2842	same_strand	upstream	Pentatricopeptide repeat domain containing protein.
OS_LNC0955	Os05g0147600	Os05t0147600-01	antisense	genic	0	overlapping	exonic	Pentatricopeptide repeat domain containing protein.
OS_LNC0989	Os05g0275000	Os05t0275000-01	sense	intergenic	581	same_strand	upstream	Pentatricopeptide repeat domain containing protein.
OS_LNC1003	Os05g0307200	Os05t0307200-00	antisense	intergenic	8432	convergent	downstream	Pentatricopeptide repeat domain containing protein.
OS_LNC1018	Os05g0355200	Os05t0355200-00	antisense	intergenic	2839	convergent	downstream	Pentatricopeptide repeat domain containing protein.
OS_LNC1019	Os05g0355200	Os05t0355200-00	antisense	intergenic	2839	convergent	downstream	Pentatricopeptide repeat domain containing protein.
OS_LNC1027	Os05g0393900	Os05t0393900-00	sense	intergenic	1569	same_strand	downstream	Pentatricopeptide repeat domain containing protein.
OS_LNC1075	Os05g0548600	Os05t0548600-00	antisense	intergenic	4508	convergent	downstream	Pentatricopeptide repeat domain containing protein.
OS_LNC1076	Os05g0548600	Os05t0548600-00	antisense	intergenic	4508	convergent	downstream	Pentatricopeptide repeat domain containing protein.
OS_LNC1263	Os06g0694600	Os06t0694600-00	antisense	intergenic	5971	convergent	downstream	Pentatricopeptide repeat domain containing protein.
OS_LNC1263	Os06g0694300	Os06t0694300-00	sense	intergenic	1195	same_strand	downstream	Pentatricopeptide repeat domain containing protein.
OS_LNC1264	Os06g0694600	Os06t0694600-00	antisense	intergenic	2652	convergent	downstream	Pentatricopeptide repeat domain containing protein.
OS_LNC1264	Os06g0694300	Os06t0694300-00	sense	intergenic	2473	same_strand	downstream	Pentatricopeptide repeat domain containing protein.
OS_LNC1265	Os06g0694600	Os06t0694600-00	antisense	intergenic	2652	convergent	downstream	Pentatricopeptide repeat domain containing protein.
OS_LNC1265	Os06g0694300	Os06t0694300-00	sense	intergenic	2476	same_strand	downstream	Pentatricopeptide repeat domain containing protein.
OS_LNC1266	Os06g0694600	Os06t0694600-00	antisense	intergenic	2486	convergent	downstream	Pentatricopeptide repeat domain containing protein.
OS_LNC1266	Os06g0694300	Os06t0694300-00	sense	intergenic	2476	same_strand	downstream	Pentatricopeptide repeat domain containing protein.
OS_LNC1267	Os06g0694600	Os06t0694600-00	antisense	intergenic	2486	convergent	downstream	Pentatricopeptide repeat domain containing protein.
OS_LNC1267	Os06g0694300	Os06t0694300-00	sense	intergenic	2476	same_strand	downstream	Pentatricopeptide repeat domain containing protein.
OS_LNC1268	Os06g0694600	Os06t0694600-00	antisense	intergenic	2827	convergent	downstream	Pentatricopeptide repeat domain containing protein.
OS_LNC1268	Os06g0694300	Os06t0694300-00	sense	intergenic	2479	same_strand	downstream	Pentatricopeptide repeat domain containing protein.
OS_LNC1287	Os07g0101200	Os07t0101200-01	antisense	intergenic	5192	divergent	upstream	Pentatricopeptide repeat domain containing protein.
OS_LNC1288	Os07g0101200	Os07t0101200-01	antisense	intergenic	5192	divergent	upstream	Pentatricopeptide repeat domain containing protein.
OS_LNC1315	Os07g0213300	Os07t0213300-02	sense	intergenic	6954	same_strand	upstream	Pentatricopeptide repeat domain containing protein.
OS_LNC1326	Os07g0260000	Os07t0260000-00	sense	intergenic	1808	same_strand	downstream	Pentatricopeptide repeat domain containing protein.
OS_LNC1421	Os07g0661900	Os07t0661900-01	sense	intergenic	4766	same_strand	downstream	Pentatricopeptide repeat domain containing protein.
OS_LNC1425	Os07g0671200	Os07t0671200-00	antisense	genic	0	overlapping	exonic	Pentatricopeptide repeat domain containing protein.
OS_LNC1426	Os07g0671200	Os07t0671200-00	antisense	intergenic	12	convergent	downstream	Pentatricopeptide repeat domain containing protein.
OS_LNC1507	Os01g0737900	Os01t0737900-01	antisense	intergenic	5767	convergent	downstream	Pentatricopeptide repeat domain containing protein.
OS_LNC1533	Os08g0340900	Os08t0340900-01	sense	intergenic	3841	same_strand	downstream	Pentatricopeptide repeat domain containing protein.
OS_LNC1551	Os08g0402600	Os08t0402600-01	antisense	intergenic	4025	divergent	upstream	Pentatricopeptide repeat domain containing protein.
OS_LNC1725	Os01g0819800	Os01t0819800-01	sense	intergenic	4818	same_strand	upstream	Pentatricopeptide repeat domain containing protein.
OS_LNC1726	Os01g0819800	Os01t0819800-01	sense	intergenic	4818	same_strand	upstream	Pentatricopeptide repeat domain containing protein.
OS_LNC1752	Os01g0897500	Os01t0897500-01	sense	intergenic	1911	same_strand	upstream	Pentatricopeptide repeat domain containing protein.
OS_LNC1893	Os10g0540100	Os10t0540100-01	sense	intergenic	3933	same_strand	upstream	Pentatricopeptide repeat domain containing protein.
OS_LNC1899	Os10g0558600	Os10t0558600-00	sense	intergenic	4634	same_strand	downstream	Pentatricopeptide repeat domain containing protein.
OS_LNC1900	Os10g0558600	Os10t0558600-00	sense	intergenic	4634	same_strand	downstream	Pentatricopeptide repeat domain containing protein.
OS_LNC1331	Os01g0696800	Os01t0696800-01	antisense	intergenic	2139	divergent	upstream	Peptidase A1 domain containing protein.
OS_LNC1387	Os07g0568500	Os07t0568500-01	sense	intergenic	3751	same_strand	downstream	Peptidase aspartic, active site domain containing protein.
OS_LNC1387	Os07g0568500	Os07t0568500-02	sense	intergenic	3674	same_strand	downstream	Peptidase aspartic, active site domain containing protein.
OS_LNC1668	Os01g0777200	Os01t0777200-01	antisense	intergenic	8415	convergent	downstream	Peptidase aspartic, catalytic domain containing protein.
OS_LNC0830	Os04g0312100	Os04t0312100-01	sense	intergenic	24326	same_strand	downstream	Peptidase C12, ubiquitin carboxyl-terminal hydrolase 1 domain containing protein.
OS_LNC1057	Os05g0488000	Os05t0488000-01	antisense	intergenic	2204	divergent	upstream	Peptidase C1A, papain family protein.
OS_LNC1058	Os05g0488000	Os05t0488000-01	antisense	intergenic	2204	divergent	upstream	Peptidase C1A, papain family protein.
OS_LNC0151	Os12g0103580	Os12t0103580-00	antisense	genic	0	overlapping	exonic	Peptidase C48, SUMO/Sentrin/Ubl1 domain containing protein.
OS_LNC0152	Os12g0103580	Os12t0103580-00	antisense	genic	0	overlapping	exonic	Peptidase C48, SUMO/Sentrin/Ubl1 domain containing protein.
OS_LNC0153	Os12g0103580	Os12t0103580-00	antisense	genic	0	overlapping	exonic	Peptidase C48, SUMO/Sentrin/Ubl1 domain containing protein.
OS_LNC0154	Os12g0103580	Os12t0103580-00	antisense	genic	0	overlapping	exonic	Peptidase C48, SUMO/Sentrin/Ubl1 domain containing protein.
OS_LNC0155	Os12g0103580	Os12t0103580-00	antisense	genic	0	overlapping	exonic	Peptidase C48, SUMO/Sentrin/Ubl1 domain containing protein.
OS_LNC0156	Os12g0103580	Os12t0103580-00	antisense	genic	0	overlapping	exonic	Peptidase C48, SUMO/Sentrin/Ubl1 domain containing protein.
OS_LNC0157	Os12g0103580	Os12t0103580-00	antisense	genic	0	overlapping	exonic	Peptidase C48, SUMO/Sentrin/Ubl1 domain containing protein.
OS_LNC0158	Os12g0103580	Os12t0103580-00	antisense	genic	0	overlapping	exonic	Peptidase C48, SUMO/Sentrin/Ubl1 domain containing protein.
OS_LNC0159	Os12g0103580	Os12t0103580-00	antisense	genic	0	overlapping	exonic	Peptidase C48, SUMO/Sentrin/Ubl1 domain containing protein.
OS_LNC1330	Os07g0267400	Os07t0267400-02	antisense	intergenic	5779	convergent	downstream	Peptidase C48, SUMO/Sentrin/Ubl1 domain containing protein.
OS_LNC0357	Os02g0218200	Os02t0218200-02	sense	intergenic	1572	same_strand	downstream	Peptidase M1, membrane alanine aminopeptidase family protein.
OS_LNC0357	Os02g0218200	Os02t0218200-01	sense	intergenic	1572	same_strand	downstream	Peptidase M1, membrane alanine aminopeptidase family protein.
OS_LNC0358	Os02g0218200	Os02t0218200-02	sense	intergenic	1572	same_strand	downstream	Peptidase M1, membrane alanine aminopeptidase family protein.
OS_LNC0358	Os02g0218200	Os02t0218200-01	sense	intergenic	1572	same_strand	downstream	Peptidase M1, membrane alanine aminopeptidase family protein.
OS_LNC1145	Os06g0239100	Os06t0239100-01	sense	intergenic	3775	same_strand	downstream	Peptidase M10A and M12B, matrixin and adamalysin family protein.
OS_LNC0299	Os02g0119300	Os02t0119300-01	sense	intergenic	7943	same_strand	downstream	Peptidase M14, carboxypeptidase A family protein.
OS_LNC1612	Os08g0560500	Os08t0560500-01	sense	genic	0	nested	exonic	Peptidase S10, serine carboxypeptidase family protein.
OS_LNC1088	Os05g0592100	Os05t0592100-01	antisense	intergenic	3903	convergent	downstream	Peptidase S14, ClpP family protein.
OS_LNC1537	Os01g0743600	Os01t0743600-02	antisense	intergenic	1629	divergent	upstream	Peptidase S16, lon N-terminal domain containing protein.
OS_LNC0777	Os04g0165600	Os04t0165600-01	antisense	intergenic	2783	divergent	upstream	Peptidase S26A, signal peptidase I family protein.
OS_LNC1605	Os08g0546700	Os08t0546700-01	antisense	intergenic	1169	convergent	downstream	Peptidase S54, rhomboid domain containing protein.
[truncated: 5,425 more rows]
