# Supplementary material for: Transcriptional Landscape of Pathogen-responsive Lncrnas Reveals OS_LNC1812-Induced Disease Resistance by Abscisic Acid Pathway in Rice
Source: Research Square preprint supplement (doi:10.21203/rs.3.rs-244393/v1), 2021-03-01
Supplement: Supplementary file 15 [file b311f72dd609adf733fcb517.xlsx]

## Sheet: as.gtf
chr1	Undefined	as_event	2922	3354	.	+	.	transcript_id "MSTRG.1.1,MSTRG.1.2"; gene_id "chr1:2922-10848W"; flanks "2922[,3354-"; structure "1^,2^"; splice_chain "3255^,3268^"; sources "Undefined,Undefined"; NMorMRNA "null"; degree "4"; dimension "2_2";
chr1	Undefined	as_event	9210	10187	.	+	.	transcript_id "Os01t0100100-01,MSTRG.1.1/MSTRG.1.2"; gene_id "chr1:2922-10848W"; flanks "9210-,10187^"; structure "1^3-,2^4-"; splice_chain "9615^10102-,9617^10104-"; sources "Undefined,Undefined"; NMorMRNA "null"; degree "4"; dimension "2_2";
chr1	Undefined	as_event	17558	18501	.	+	.	transcript_id "MSTRG.6.2,MSTRG.6.1/Os01t0100500-01"; gene_id "chr1:16399-20332W"; flanks "17558-,18501-"; structure "1^,2^"; splice_chain "18120^,18258^"; sources "Undefined,Undefined"; NMorMRNA "null"; degree "4"; dimension "2_2";
chr1	Undefined	as_event	23281	23847	.	+	.	transcript_id "Os01t0100600-01,MSTRG.7.2"; gene_id "chr1:22841-28644W"; flanks "23281^,23847^"; structure "1-,2-"; splice_chain "23572-,23615-"; sources "Undefined,Undefined"; NMorMRNA "null"; degree "4"; dimension "2_2";
chr1	Undefined	as_event	22841	23847	.	+	.	transcript_id "MSTRG.7.1,Os01t0100600-01,MSTRG.7.2"; gene_id "chr1:22841-28644W"; flanks "22841[,23847^"; structure "0,1^2-,1^3-"; splice_chain ",23281^23572-,23281^23615-"; sources "Undefined,Undefined,Undefined"; NMorMRNA "null"; degree "9"; dimension "3_3";
chr1	Undefined	as_event	30146	30735	.	+	.	transcript_id "MSTRG.9.1/Os01t0100800-01,MSTRG.9.2"; gene_id "chr1:29788-34547W"; flanks "30146-,30735-"; structure "1^,2^"; splice_chain "30228^,30231^"; sources "Undefined,Undefined"; NMorMRNA "null"; degree "4"; dimension "2_2";
chr1	Undefined	as_event	30228	30885	.	+	.	transcript_id "MSTRG.9.4,MSTRG.9.1/Os01t0100800-01"; gene_id "chr1:29788-34547W"; flanks "30228^,30885-"; structure "0,1-2^"; splice_chain ",30735-30806^"; sources "Undefined,Undefined"; NMorMRNA "null"; degree "4"; dimension "2_2";
chr1	Undefined	as_event	30146	30885	.	+	.	transcript_id "MSTRG.9.4,MSTRG.9.1/Os01t0100800-01,MSTRG.9.2"; gene_id "chr1:29788-34547W"; flanks "30146-,30885-"; structure "1^,1^3-4^,2^3-4^"; splice_chain "30228^,30228^30735-30806^,30231^30735-30806^"; sources "Undefined,Undefined,Undefined"; NMorMRNA "null"; degree "9"; dimension "3_3";
chr1	Undefined	as_event	31258	31505	.	+	.	transcript_id "MSTRG.9.1/MSTRG.9.2/MSTRG.9.4/Os01t0100800-01,MSTRG.9.5"; gene_id "chr1:29788-34547W"; flanks "31258-,31505-"; structure "1^,2^"; splice_chain "31325^,31331^"; sources "Undefined,Undefined"; NMorMRNA "null"; degree "4"; dimension "2_2";
chr1	Undefined	as_event	32466	32616	.	+	.	transcript_id "MSTRG.9.1/MSTRG.9.2/MSTRG.9.4/MSTRG.9.5/Os01t0100800-01,MSTRG.9.6"; gene_id "chr1:29788-34547W"; flanks "32466^,32616^"; structure "1-,2-"; splice_chain "32542-,32549-"; sources "Undefined,Undefined"; NMorMRNA "null"; degree "4"; dimension "2_2";
chr1	Undefined	as_event	32828	33330	.	+	.	transcript_id "MSTRG.9.5,Os01t0100800-01,MSTRG.9.1/MSTRG.9.2/MSTRG.9.4"; gene_id "chr1:29788-34547W"; flanks "32828-,33330^"; structure "0,1^3-,2^4-"; splice_chain ",32905^33274-,32908^33277-"; sources "Undefined,Undefined,Undefined"; NMorMRNA "null"; degree "9"; dimension "3_3";
chr1	Undefined	as_event	32828	33471	.	+	.	transcript_id "MSTRG.9.6,Os01t0100800-01,MSTRG.9.1/MSTRG.9.2/MSTRG.9.4,MSTRG.9.5"; gene_id "chr1:29788-34547W"; flanks "32828-,33471^"; structure "0,1^3-5^6-,2^4-5^6-,5^6-"; splice_chain ",32905^33274-33330^33400-,32908^33277-33330^33400-,33330^33400-"; sources "Undefined,Undefined,Undefined,Undefined"; NMorMRNA "null"; degree "16"; dimension "4_4";
chr1	Undefined	as_event	62112	62385	.	+	.	transcript_id "Os01t0101200-02,MSTRG.15.2"; gene_id "chr1:62060-65537W"; flanks "62112[,62385-"; structure "1^,2^"; splice_chain "62295^,62299^"; sources "Undefined,Undefined"; NMorMRNA "null"; degree "4"; dimension "2_2";
chr1	Undefined	as_event	62996	63576	.	+	.	transcript_id "MSTRG.15.2,Os01t0101200-01"; gene_id "chr1:62060-65537W"; flanks "62996-,63576]"; structure "0,1^2-"; splice_chain ",63114^63248-"; sources "Undefined,Undefined"; NMorMRNA "null"; degree "4"; dimension "2_2";
chr1	Undefined	as_event	77871	78109	.	+	.	transcript_id "MSTRG.17.6,MSTRG.17.5"; gene_id "chr1:72816-84346W"; flanks "77871-,78109-"; structure "1^,2^"; splice_chain "77901^,77978^"; sources "Undefined,Undefined"; NMorMRNA "null"; degree "4"; dimension "2_2";
chr1	Undefined	as_event	77406	78109	.	+	.	transcript_id "MSTRG.17.2,MSTRG.17.6,MSTRG.17.5"; gene_id "chr1:72816-84346W"; flanks "77406^,78109-"; structure "0,1-2^,1-3^"; splice_chain ",77871-77901^,77871-77978^"; sources "Undefined,Undefined,Undefined"; NMorMRNA "null"; degree "9"; dimension "3_3";
chr1	Undefined	as_event	77871	78191	.	+	.	transcript_id "MSTRG.17.4,MSTRG.17.6,MSTRG.17.5"; gene_id "chr1:72816-84346W"; flanks "77871-,78191^"; structure "0,1^3-,2^3-"; splice_chain ",77901^78109-,77978^78109-"; sources "Undefined,Undefined,Undefined"; NMorMRNA "null"; degree "9"; dimension "3_3";
chr1	Undefined	as_event	77406	78191	.	+	.	transcript_id "MSTRG.17.4,MSTRG.17.6,MSTRG.17.5,MSTRG.17.2"; gene_id "chr1:72816-84346W"; flanks "77406^,78191^"; structure "1-,1-2^4-,1-3^4-,4-"; splice_chain "77871-,77871-77901^78109-,77871-77978^78109-,78109-"; sources "Undefined,Undefined,Undefined,Undefined"; NMorMRNA "null"; degree "16"; dimension "4_4";
chr1	Undefined	as_event	134698	134912	.	+	.	transcript_id "Os01t0102300-01,MSTRG.21.1"; gene_id "chr1:134300-135439W"; flanks "134698-,134912-"; structure "1^,2^"; splice_chain "134824^,134830^"; sources "Undefined,Undefined"; NMorMRNA "null"; degree "4"; dimension "2_2";
chr1	Undefined	as_event	141959	143680	.	+	.	transcript_id "MSTRG.23.1,Os01t0102500-01"; gene_id "chr1:141959-147847W"; flanks "141959[,143680^"; structure "0,1^2-3^4-"; splice_chain ",142631^143191-143431^143563-"; sources "Undefined,Undefined"; NMorMRNA "null"; degree "4"; dimension "2_2";
chr1	Undefined	as_event	146028	146339	.	+	.	transcript_id "MSTRG.23.3,MSTRG.23.1/Os01t0102600-01"; gene_id "chr1:141959-147847W"; flanks "146028-,146339^"; structure "0,1^2-"; splice_chain ",146082^146179-"; sources "Undefined,Undefined"; NMorMRNA "null"; degree "4"; dimension "2_2";
chr1	Undefined	as_event	148313	149548	.	+	.	transcript_id "MSTRG.24.3,MSTRG.24.1/Os01t0102700-01"; gene_id "chr1:147918-150600W"; flanks "148313^,149548^"; structure "1-,2-"; splice_chain "149101-,149450-"; sources "Undefined,Undefined"; NMorMRNA "null"; degree "4"; dimension "2_2";
chr1	Undefined	as_event	149856	150152	.	+	.	transcript_id "MSTRG.24.1/MSTRG.24.3,Os01t0102700-01"; gene_id "chr1:147918-150600W"; flanks "149856-,150152-"; structure "1^3-4^,2^"; splice_chain "149927^150056-150061^,149931^"; sources "Undefined,Undefined"; NMorMRNA "null"; degree "4"; dimension "2_2";
chr1	Undefined	as_event	164107	169399	.	+	.	transcript_id "MSTRG.26.1,MSTRG.26.3"; gene_id "chr1:162844-170255W"; flanks "164107^,169399^"; structure "1-,2-"; splice_chain "168625-,168628-"; sources "Undefined,Undefined"; NMorMRNA "null"; degree "4"; dimension "2_2";
chr1	Undefined	as_event	168625	169523	.	+	.	transcript_id "MSTRG.26.2,MSTRG.26.1"; gene_id "chr1:162844-170255W"; flanks "168625-,169523-"; structure "1^,2^"; splice_chain "168921^,169399^"; sources "Undefined,Undefined"; NMorMRNA "null"; degree "4"; dimension "2_2";
chr1	Undefined	as_event	164107	169523	.	+	.	transcript_id "MSTRG.26.2,MSTRG.26.1,MSTRG.26.3"; gene_id "chr1:162844-170255W"; flanks "164107^,169523-"; structure "1-3^,1-4^,2-4^"; splice_chain "168625-168921^,168625-169399^,168628-169399^"; sources "Undefined,Undefined,Undefined"; NMorMRNA "null"; degree "9"; dimension "3_3";
chr1	Undefined	as_event	169527	169860	.	+	.	transcript_id "MSTRG.26.9,MSTRG.26.10,MSTRG.26.8"; gene_id "chr1:162844-170255W"; flanks "169527-,169860^"; structure "0,1^4-,2^3-"; splice_chain ",169602^169774-,169665^169751-"; sources "Undefined,Undefined,Undefined"; NMorMRNA "null"; degree "9"; dimension "3_3";
chr1	Undefined	as_event	169523	170093	.	+	.	transcript_id "MSTRG.26.2,MSTRG.26.6"; gene_id "chr1:162844-170255W"; flanks "169523-,170093]"; structure "1^4-,2^3-"; splice_chain "169602^169774-,169665^169751-"; sources "Undefined,Undefined"; NMorMRNA "null"; degree "4"; dimension "2_2";
chr1	Undefined	as_event	169885	170236	.	+	.	transcript_id "MSTRG.26.4,MSTRG.26.1/MSTRG.26.8"; gene_id "chr1:162844-170255W"; flanks "169885-,170236]"; structure "0,1^2-"; splice_chain ",169906^170090-"; sources "Undefined,Undefined"; NMorMRNA "null"; degree "4"; dimension "2_2";
chr1	Undefined	as_event	169860	170236	.	+	.	transcript_id "MSTRG.26.8,MSTRG.26.3/MSTRG.26.7"; gene_id "chr1:162844-170255W"; flanks "169860^,170236]"; structure "1-2^3-,4-"; splice_chain "169885-169906^170090-,170192-"; sources "Undefined,Undefined"; NMorMRNA "null"; degree "4"; dimension "2_2";
chr1	Undefined	as_event	169523	170236	.	+	.	transcript_id "MSTRG.26.4,MSTRG.26.1,MSTRG.26.3"; gene_id "chr1:162844-170255W"; flanks "169523-,170236]"; structure "1^5-,1^5-6^7-,2^3-4^8-"; splice_chain "169631^169885-,169631^169885-169906^170090-,169665^169751-169860^170192-"; sources "Undefined,Undefined,Undefined"; NMorMRNA "null"; degree "9"; dimension "3_3";
chr1	Undefined	as_event	197915	198034	.	+	.	transcript_id "MSTRG.37.4,MSTRG.37.2"; gene_id "chr1:197249-200803W"; flanks "197915-,198034-"; structure "1^,2^"; splice_chain "197947^,197954^"; sources "Undefined,Undefined"; NMorMRNA "null"; degree "4"; dimension "2_2";
chr1	Undefined	as_event	197838	198034	.	+	.	transcript_id "Os01t0103800-01,MSTRG.37.4,MSTRG.37.2"; gene_id "chr1:197249-200803W"; flanks "197838^,198034-"; structure "0,1-2^,1-3^"; splice_chain ",197915-197947^,197915-197954^"; sources "Undefined,Undefined,Undefined"; NMorMRNA "null"; degree "9"; dimension "3_3";
chr1	Undefined	as_event	197915	198225	.	+	.	transcript_id "MSTRG.37.1,MSTRG.37.4,MSTRG.37.2"; gene_id "chr1:197249-200803W"; flanks "197915-,198225^"; structure "0,1^3-,2^3-"; splice_chain ",197947^198034-,197954^198034-"; sources "Undefined,Undefined,Undefined"; NMorMRNA "null"; degree "9"; dimension "3_3";
chr1	Undefined	as_event	197838	198225	.	+	.	transcript_id "MSTRG.37.1,MSTRG.37.4,MSTRG.37.2,Os01t0103800-01"; gene_id "chr1:197249-200803W"; flanks "197838^,198225^"; structure "1-,1-2^4-,1-3^4-,4-"; splice_chain "197915-,197915-197947^198034-,197915-197954^198034-,198034-"; sources "Undefined,Undefined,Undefined,Undefined"; NMorMRNA "null"; degree "16"; dimension "4_4";
chr1	Undefined	as_event	209794	210244	.	+	.	transcript_id "MSTRG.40.3,Os01t0104100-02"; gene_id "chr1:209771-214173W"; flanks "209794[,210244-"; structure "1^,2^"; splice_chain "209892^,209896^"; sources "Undefined,Undefined"; NMorMRNA "null"; degree "4"; dimension "2_2";
chr1	Undefined	as_event	209794	210563	.	+	.	transcript_id "MSTRG.40.2,MSTRG.40.3,Os01t0104100-02"; gene_id "chr1:209771-214173W"; flanks "209794[,210563^"; structure "0,1^3-,2^3-"; splice_chain ",209892^210244-,209896^210244-"; sources "Undefined,Undefined,Undefined"; NMorMRNA "null"; degree "9"; dimension "3_3";
chr1	Undefined	as_event	261941	262681	.	+	.	transcript_id "MSTRG.47.3/MSTRG.47.4/Os01t0104800-01,MSTRG.47.1"; gene_id "chr1:261530-268819W"; flanks "261941^,262681^"; structure "1-,2-"; splice_chain "262582-,262611-"; sources "Undefined,Undefined"; NMorMRNA "null"; degree "4"; dimension "2_2";
chr1	Undefined	as_event	265506	265740	.	+	.	transcript_id "MSTRG.47.1/MSTRG.47.3/Os01t0104800-01/Os01t0104800-02,MSTRG.47.4"; gene_id "chr1:261530-268819W"; flanks "265506-,265740-"; structure "1^,2^"; splice_chain "265649^,265661^"; sources "Undefined,Undefined"; NMorMRNA "null"; degree "4"; dimension "2_2";
chr1	Undefined	as_event	265506	265817	.	+	.	transcript_id "MSTRG.47.6,MSTRG.47.1/MSTRG.47.3/Os01t0104800-01/Os01t0104800-02,MSTRG.47.4"; gene_id "chr1:261530-268819W"; flanks "265506-,265817^"; structure "0,1^3-,2^3-"; splice_chain ",265649^265740-,265661^265740-"; sources "Undefined,Undefined,Undefined"; NMorMRNA "null"; degree "9"; dimension "3_3";
chr1	Undefined	as_event	265909	266138	.	+	.	transcript_id "MSTRG.47.6/Os01t0104800-01/Os01t0104800-02,MSTRG.47.4"; gene_id "chr1:261530-268819W"; flanks "265909-,266138-"; structure "1^,2^"; splice_chain "266045^,266055^"; sources "Undefined,Undefined"; NMorMRNA "null"; degree "4"; dimension "2_2";
chr1	Undefined	as_event	266045	266246	.	+	.	transcript_id "MSTRG.47.6/Os01t0104800-01/Os01t0104800-02,MSTRG.47.1/MSTRG.47.3"; gene_id "chr1:261530-268819W"; flanks "266045^,266246^"; structure "1-,2-"; splice_chain "266138-,266141-"; sources "Undefined,Undefined"; NMorMRNA "null"; degree "4"; dimension "2_2";
chr1	Undefined	as_event	265909	266246	.	+	.	transcript_id "MSTRG.47.6/Os01t0104800-01/Os01t0104800-02,MSTRG.47.1/MSTRG.47.3,MSTRG.47.4"; gene_id "chr1:261530-268819W"; flanks "265909-,266246^"; structure "1^3-,1^4-,2^3-"; splice_chain "266045^266138-,266045^266141-,266055^266138-"; sources "Undefined,Undefined,Undefined"; NMorMRNA "null"; degree "9"; dimension "3_3";
chr1	Undefined	as_event	289572	289830	.	+	.	transcript_id "MSTRG.53.4/MSTRG.53.6,MSTRG.53.1/MSTRG.53.2/Os01t0105400-01,MSTRG.53.7"; gene_id "chr1:288372-293367W"; flanks "289572^,289830^"; structure "1-,2-,3-"; splice_chain "289637-,289661-,289666-"; sources "Undefined,Undefined,Undefined"; NMorMRNA "null"; degree "9"; dimension "3_3";
chr1	Undefined	as_event	289830	290512	.	+	.	transcript_id "MSTRG.53.1/MSTRG.53.2/MSTRG.53.4/MSTRG.53.6/MSTRG.53.7,Os01t0105400-01"; gene_id "chr1:288372-293367W"; flanks "289830^,290512^"; structure "1-,2-"; splice_chain "290354-,290395-"; sources "Undefined,Undefined"; NMorMRNA "null"; degree "4"; dimension "2_2";
chr1	Undefined	as_event	289637	290512	.	+	.	transcript_id "MSTRG.53.3,MSTRG.53.4/MSTRG.53.6"; gene_id "chr1:288372-293367W"; flanks "289637-,290512^"; structure "0,1^2-"; splice_chain ",289830^290354-"; sources "Undefined,Undefined"; NMorMRNA "null"; degree "4"; dimension "2_2";
chr1	Undefined	as_event	289572	290512	.	+	.	transcript_id "MSTRG.53.3,MSTRG.53.4/MSTRG.53.6,MSTRG.53.1/MSTRG.53.2,Os01t0105400-01,MSTRG.53.7"; gene_id "chr1:288372-293367W"; flanks "289572^,290512^"; structure "1-,1-4^5-,2-4^5-,2-4^6-,3-4^5-"; splice_chain "289637-,289637-289830^290354-,289661-289830^290354-,289661-289830^290395-,289666-289830^290354-"; sources "Undefined,Undefined,Undefined,Undefined,Undefined"; NMorMRNA "null"; degree "2…
chr1	Undefined	as_event	291779	291948	.	+	.	transcript_id "MSTRG.53.1/MSTRG.53.6,MSTRG.53.2/MSTRG.53.3/MSTRG.53.4/Os01t0105400-01"; gene_id "chr1:288372-293367W"; flanks "291779^,291948^"; structure "1-,2-"; splice_chain "291856-,291859-"; sources "Undefined,Undefined"; NMorMRNA "null"; degree "4"; dimension "2_2";
chr1	Undefined	as_event	337577	338070	.	+	.	transcript_id "Os01t0106700-00,MSTRG.63.1/MSTRG.63.3"; gene_id "chr1:335067-371198W"; flanks "337577-,338070^"; structure "1^4-,2^3-"; splice_chain "337734^337972-,337772^337914-"; sources "Undefined,Undefined"; NMorMRNA "null"; degree "4"; dimension "2_2";
chr1	Undefined	as_event	339444	340262	.	+	.	transcript_id "Os01t0106700-00,MSTRG.63.1/MSTRG.63.3"; gene_id "chr1:335067-371198W"; flanks "339444^,340262-"; structure "0,1-2^"; splice_chain ",340060-340116^"; sources "Undefined,Undefined"; NMorMRNA "null"; degree "4"; dimension "2_2";
chr1	Undefined	as_event	340337	340969	.	+	.	transcript_id "Os01t0106700-00,MSTRG.63.1/MSTRG.63.3"; gene_id "chr1:335067-371198W"; flanks "340337^,340969-"; structure "0,1-2^"; splice_chain ",340519-340602^"; sources "Undefined,Undefined"; NMorMRNA "null"; degree "4"; dimension "2_2";
chr1	Undefined	as_event	341010	343370	.	+	.	transcript_id "Os01t0106700-00,MSTRG.63.1/MSTRG.63.3"; gene_id "chr1:335067-371198W"; flanks "341010^,343370-"; structure "0,1-2^3-4^"; splice_chain ",341128-341198^342516-342564^"; sources "Undefined,Undefined"; NMorMRNA "null"; degree "4"; dimension "2_2";
chr1	Undefined	as_event	343441	344393	.	+	.	transcript_id "Os01t0106700-00,MSTRG.63.1/MSTRG.63.3"; gene_id "chr1:335067-371198W"; flanks "343441^,344393-"; structure "0,1-2^"; splice_chain ",344149-344286^"; sources "Undefined,Undefined"; NMorMRNA "null"; degree "4"; dimension "2_2";
chr1	Undefined	as_event	344393	345166	.	+	.	transcript_id "MSTRG.63.1/Os01t0106700-00,MSTRG.63.3"; gene_id "chr1:335067-371198W"; flanks "344393-,345166-"; structure "1^,2^"; splice_chain "344473^,344537^"; sources "Undefined,Undefined"; NMorMRNA "null"; degree "4"; dimension "2_2";
chr1	Undefined	as_event	346342	347729	.	+	.	transcript_id "Os01t0106700-00,MSTRG.63.1/MSTRG.63.3"; gene_id "chr1:335067-371198W"; flanks "346342^,347729-"; structure "0,1-2^"; splice_chain ",346458-346622^"; sources "Undefined,Undefined"; NMorMRNA "null"; degree "4"; dimension "2_2";
chr1	Undefined	as_event	352974	354065	.	+	.	transcript_id "Os01t0106700-00,MSTRG.63.1/MSTRG.63.3"; gene_id "chr1:335067-371198W"; flanks "352974-,354065-"; structure "1^,2^3-4^5-6^"; splice_chain "353063^,353101^353585-353726^353806-353946^"; sources "Undefined,Undefined"; NMorMRNA "null"; degree "4"; dimension "2_2";
chr1	Undefined	as_event	354163	354758	.	+	.	transcript_id "Os01t0106700-00,MSTRG.63.1/MSTRG.63.3"; gene_id "chr1:335067-371198W"; flanks "354163^,354758-"; structure "0,1-2^3-4^"; splice_chain ",354239-354285^354454-354652^"; sources "Undefined,Undefined"; NMorMRNA "null"; degree "4"; dimension "2_2";
chr1	Undefined	as_event	355905	356863	.	+	.	transcript_id "MSTRG.63.1/MSTRG.63.3,Os01t0106700-00"; gene_id "chr1:335067-371198W"; flanks "355905^,356863^"; structure "1-2^3-4^5-,6-"; splice_chain "356306-356414^356521-356644^356732-,356829-"; sources "Undefined,Undefined"; NMorMRNA "null"; degree "4"; dimension "2_2";
chr1	Undefined	as_event	367383	368308	.	+	.	transcript_id "Os01t0106700-00,MSTRG.63.1/MSTRG.63.3"; gene_id "chr1:335067-371198W"; flanks "367383^,368308-"; structure "0,1-2^"; splice_chain ",368067-368156^"; sources "Undefined,Undefined"; NMorMRNA "null"; degree "4"; dimension "2_2";
chr1	Undefined	as_event	422539	422972	.	+	.	transcript_id "MSTRG.76.4,MSTRG.76.1/MSTRG.76.2/MSTRG.76.3/MSTRG.76.5/MSTRG.76.6/Os01t0108000-01"; gene_id "chr1:422539-431786W"; flanks "422539[,422972^"; structure "0,1^2-"; splice_chain ",422748^422910-"; sources "Undefined,Undefined"; NMorMRNA "null"; degree "4"; dimension "2_2";
chr1	Undefined	as_event	423524	423930	.	+	.	transcript_id "MSTRG.76.2,MSTRG.76.1/MSTRG.76.3/MSTRG.76.4/MSTRG.76.5/MSTRG.76.6/Os01t0108000-01"; gene_id "chr1:422539-431786W"; flanks "423524-,423930^"; structure "0,1^2-3^4-"; splice_chain ",423620^423697-423774^423871-"; sources "Undefined,Undefined"; NMorMRNA "null"; degree "4"; dimension "2_2";
chr1	Undefined	as_event	425186	425568	.	+	.	transcript_id "MSTRG.76.5,MSTRG.76.1/MSTRG.76.2/MSTRG.76.3/MSTRG.76.4/MSTRG.76.6/Os01t0108000-01"; gene_id "chr1:422539-431786W"; flanks "425186^,425568-"; structure "1-3^,2-4^"; splice_chain "425350-425487^,425380-425496^"; sources "Undefined,Undefined"; NMorMRNA "null"; degree "4"; dimension "2_2";
chr1	Undefined	as_event	425755	426785	.	+	.	transcript_id "MSTRG.76.3/MSTRG.76.4/MSTRG.76.5/MSTRG.76.6,MSTRG.76.1/MSTRG.76.2/Os01t0108000-01"; gene_id "chr1:422539-431786W"; flanks "425755^,426785^"; structure "1-,2-"; splice_chain "426502-,426514-"; sources "Undefined,Undefined"; NMorMRNA "null"; degree "4"; dimension "2_2";
chr1	Undefined	as_event	428693	428912	.	+	.	transcript_id "MSTRG.76.1/MSTRG.76.3,MSTRG.76.2/MSTRG.76.4/MSTRG.76.5/MSTRG.76.6/Os01t0108000-01"; gene_id "chr1:422539-431786W"; flanks "428693^,428912^"; structure "1-,2-"; splice_chain "428790-,428793-"; sources "Undefined,Undefined"; NMorMRNA "null"; degree "4"; dimension "2_2";
chr1	Undefined	as_event	438063	438774	.	+	.	transcript_id "MSTRG.78.1/MSTRG.78.4/MSTRG.78.5,MSTRG.78.2/MSTRG.78.3/MSTRG.78.6"; gene_id "chr1:437643-450152W"; flanks "438063^,438774^"; structure "1-,2-"; splice_chain "438679-,438698-"; sources "Undefined,Undefined"; NMorMRNA "null"; degree "4"; dimension "2_2";
chr1	Undefined	as_event	441733	442805	.	+	.	transcript_id "MSTRG.78.1/MSTRG.78.2/MSTRG.78.4/MSTRG.78.6/MSTRG.78.7/Os01t0108200-01,MSTRG.78.3/MSTRG.78.5"; gene_id "chr1:437643-450152W"; flanks "441733^,442805^"; structure "1-,2-"; splice_chain "442605-,442610-"; sources "Undefined,Undefined"; NMorMRNA "null"; degree "4"; dimension "2_2";
chr1	Undefined	as_event	442915	443058	.	+	.	transcript_id "MSTRG.78.1/MSTRG.78.2/MSTRG.78.3/MSTRG.78.4/MSTRG.78.5/MSTRG.78.7/Os01t0108200-01,MSTRG.78.6"; gene_id "chr1:437643-450152W"; flanks "442915-,443058-"; structure "1^,2^"; splice_chain "442985^,442989^"; sources "Undefined,Undefined"; NMorMRNA "null"; degree "4"; dimension "2_2";
chr1	Undefined	as_event	445166	445759	.	+	.	transcript_id "MSTRG.78.1/MSTRG.78.2/MSTRG.78.3/MSTRG.78.4/MSTRG.78.5/Os01t0108200-01,MSTRG.78.6/MSTRG.78.7"; gene_id "chr1:437643-450152W"; flanks "445166-,445759^"; structure "0,1^2-"; splice_chain ",445492^445669-"; sources "Undefined,Undefined"; NMorMRNA "null"; degree "4"; dimension "2_2";
chr1	Undefined	as_event	445869	446249	.	+	.	transcript_id "MSTRG.78.1/MSTRG.78.2/MSTRG.78.3/MSTRG.78.5/MSTRG.78.6/MSTRG.78.7/Os01t0108200-01,MSTRG.78.4"; gene_id "chr1:437643-450152W"; flanks "445869-,446249^"; structure "0,1^2-"; splice_chain ",446006^446189-"; sources "Undefined,Undefined"; NMorMRNA "null"; degree "4"; dimension "2_2";
chr1	Undefined	as_event	455907	457104	.	+	.	transcript_id "MSTRG.79.1/MSTRG.79.2/MSTRG.79.3,Os01t0108400-00"; gene_id "chr1:455492-461371W"; flanks "455907^,457104^"; structure "1-,2-"; splice_chain "456676-,456682-"; sources "Undefined,Undefined"; NMorMRNA "null"; degree "4"; dimension "2_2";
chr1	Undefined	as_event	457351	461371	.	+	.	transcript_id "MSTRG.79.2,MSTRG.79.3"; gene_id "chr1:455492-461371W"; flanks "457351^,461371]"; structure "1-,2-"; splice_chain "457536-,457539-"; sources "Undefined,Undefined"; NMorMRNA "null"; degree "4"; dimension "2_2";
chr1	Undefined	as_event	457278	461371	.	+	.	transcript_id "MSTRG.79.1,MSTRG.79.2,MSTRG.79.3"; gene_id "chr1:455492-461371W"; flanks "457278-,461371]"; structure "0,1^2-,1^3-"; splice_chain ",457351^457536-,457351^457539-"; sources "Undefined,Undefined,Undefined"; NMorMRNA "null"; degree "9"; dimension "3_3";
chr1	Undefined	as_event	500444	500598	.	+	.	transcript_id "MSTRG.85.1,Os01t0109300-01"; gene_id "chr1:498668-506233W"; flanks "500444-,500598^"; structure "0,1^2-"; splice_chain ",500481^500576-"; sources "Undefined,Undefined"; NMorMRNA "null"; degree "4"; dimension "2_2";
chr1	Undefined	as_event	500481	502156	.	+	.	transcript_id "MSTRG.85.2,Os01t0109300-01"; gene_id "chr1:498668-506233W"; flanks "500481^,502156-"; structure "0,1-2^"; splice_chain ",500576-500598^"; sources "Undefined,Undefined"; NMorMRNA "null"; degree "4"; dimension "2_2";
chr1	Undefined	as_event	500444	502156	.	+	.	transcript_id "MSTRG.85.2,Os01t0109300-01,MSTRG.85.1"; gene_id "chr1:498668-506233W"; flanks "500444-,502156-"; structure "1^,1^2-3^,3^"; splice_chain "500481^,500481^500576-500598^,500598^"; sources "Undefined,Undefined,Undefined"; NMorMRNA "null"; degree "9"; dimension "3_3";
chr1	Undefined	as_event	549478	549892	.	+	.	transcript_id "MSTRG.97.1,Os01t0110400-01"; gene_id "chr1:549157-552574W"; flanks "549478-,549892^"; structure "0,1^2-"; splice_chain ",549651^549787-"; sources "Undefined,Undefined"; NMorMRNA "null"; degree "4"; dimension "2_2";
chr1	Undefined	as_event	590240	591902	.	+	.	transcript_id "MSTRG.105.1,Os01t0111200-01"; gene_id "chr1:588917-593714W"; flanks "590240-,591902^"; structure "0,1^2-"; splice_chain ",591178^591837-"; sources "Undefined,Undefined"; NMorMRNA "null"; degree "4"; dimension "2_2";
chr1	Undefined	as_event	598335	598764	.	+	.	transcript_id "MSTRG.107.7,MSTRG.107.6"; gene_id "chr1:598290-601467W"; flanks "598335[,598764-"; structure "1^,2^"; splice_chain "598479^,598651^"; sources "Undefined,Undefined"; NMorMRNA "null"; degree "4"; dimension "2_2";
chr1	Undefined	as_event	598479	598940	.	+	.	transcript_id "MSTRG.107.3/Os01t0111400-01,MSTRG.107.5,MSTRG.107.2/MSTRG.107.7/Os01t0111400-02"; gene_id "chr1:598290-601467W"; flanks "598479^,598940^"; structure "1-,2-,3-"; splice_chain "598707-,598759-,598764-"; sources "Undefined,Undefined,Undefined"; NMorMRNA "null"; degree "9"; dimension "3_3";
chr1	Undefined	as_event	599229	600211	.	+	.	transcript_id "MSTRG.107.2/MSTRG.107.6/Os01t0111400-01,MSTRG.107.3/MSTRG.107.5/MSTRG.107.7"; gene_id "chr1:598290-601467W"; flanks "599229-,600211^"; structure "0,1^2-"; splice_chain ",599571^599729-"; sources "Undefined,Undefined"; NMorMRNA "null"; degree "4"; dimension "2_2";
chr1	Undefined	as_event	747107	748945	.	+	.	transcript_id "MSTRG.140.2,Os01t0113800-01"; gene_id "chr1:745452-748948W"; flanks "747107-,748945]"; structure "0,1^2-"; splice_chain ",747130^747500-"; sources "Undefined,Undefined"; NMorMRNA "null"; degree "4"; dimension "2_2";
chr1	Undefined	as_event	770332	772123	.	+	.	transcript_id "MSTRG.146.5,MSTRG.146.4"; gene_id "chr1:769858-869370W"; flanks "770332[,772123^"; structure "1^2-,3^4-"; splice_chain "770587^770720-,771213^772020-"; sources "Undefined,Undefined"; NMorMRNA "null"; degree "4"; dimension "2_2";
chr1	Undefined	as_event	771213	772340	.	+	.	transcript_id "MSTRG.146.2/MSTRG.146.3,MSTRG.146.1/MSTRG.146.4"; gene_id "chr1:769858-869370W"; flanks "771213^,772340-"; structure "0,1-2^"; splice_chain ",772020-772123^"; sources "Undefined,Undefined"; NMorMRNA "null"; degree "4"; dimension "2_2";
chr1	Undefined	as_event	770332	772340	.	+	.	transcript_id "MSTRG.146.5,MSTRG.146.2/MSTRG.146.3,MSTRG.146.4"; gene_id "chr1:769858-869370W"; flanks "770332[,772340-"; structure "1^2-5^,3^,3^4-5^"; splice_chain "770587^770720-772123^,771213^,771213^772020-772123^"; sources "Undefined,Undefined,Undefined"; NMorMRNA "null"; degree "9"; dimension "3_3";
chr1	Undefined	as_event	771213	772363	.	+	.	transcript_id "MSTRG.146.1/MSTRG.146.4,MSTRG.146.7,MSTRG.146.2/MSTRG.146.3"; gene_id "chr1:769858-869370W"; flanks "771213^,772363^"; structure "1-3^4-,2-,4-"; splice_chain "772020-772123^772340-,772029-,772340-"; sources "Undefined,Undefined,Undefined"; NMorMRNA "null"; degree "9"; dimension "3_3";
chr1	Undefined	as_event	770332	772363	.	+	.	transcript_id "Os01t0114300-01,MSTRG.146.5,MSTRG.146.4,MSTRG.146.2/MSTRG.146.3"; gene_id "chr1:769858-869370W"; flanks "770332[,772363^"; structure "0,1^2-5^6-,3^4-5^6-,3^6-"; splice_chain ",770587^770720-772123^772340-,771213^772020-772123^772340-,771213^772340-"; sources "Undefined,Undefined,Undefined,Undefined"; NMorMRNA "null"; degree "16"; dimension "4_4";
chr1	Undefined	as_event	809557	810705	.	+	.	transcript_id "MSTRG.159.4,MSTRG.159.3"; gene_id "chr1:769858-869370W"; flanks "809557^,810705-"; structure "0,1-2^"; splice_chain ",810227-810288^"; sources "Undefined,Undefined"; NMorMRNA "null"; degree "4"; dimension "2_2";
chr1	Undefined	as_event	845964	847399	.	+	.	transcript_id "MSTRG.163.1,Os01t0115600-01"; gene_id "chr1:769858-869370W"; flanks "845964-,847399]"; structure "0,1^2-"; splice_chain ",845987^846202-"; sources "Undefined,Undefined"; NMorMRNA "null"; degree "4"; dimension "2_2";
chr1	Undefined	as_event	844311	847399	.	+	.	transcript_id "MSTRG.163.2,MSTRG.163.1,Os01t0115600-01"; gene_id "chr1:769858-869370W"; flanks "844311^,847399]"; structure "1-,2-,2-3^4-"; splice_chain "844446-,845964-,845964-845987^846202-"; sources "Undefined,Undefined,Undefined"; NMorMRNA "null"; degree "9"; dimension "3_3";
chr1	Undefined	as_event	848700	855027	.	+	.	transcript_id "MSTRG.164.3,MSTRG.164.1"; gene_id "chr1:769858-869370W"; flanks "848700^,855027]"; structure "1-,2-"; splice_chain "854166-,854363-"; sources "Undefined,Undefined"; NMorMRNA "null"; degree "4"; dimension "2_2";
chr1	Undefined	as_event	867883	869355	.	+	.	transcript_id "MSTRG.146.11,MSTRG.146.10"; gene_id "chr1:769858-869370W"; flanks "867883^,869355]"; structure "1-,2-"; splice_chain "868006-,868018-"; sources "Undefined,Undefined"; NMorMRNA "null"; degree "4"; dimension "2_2";
chr1	Undefined	as_event	925158	933072	.	+	.	transcript_id "MSTRG.177.1,MSTRG.177.2"; gene_id "chr1:924188-990834W"; flanks "925158^,933072]"; structure "1-,2-"; splice_chain "932673-,932677-"; sources "Undefined,Undefined"; NMorMRNA "null"; degree "4"; dimension "2_2";
chr1	Undefined	as_event	1009009	1010959	.	+	.	transcript_id "MSTRG.193.2,MSTRG.193.1"; gene_id "chr1:1007434-1012400W"; flanks "1009009-,1010959^"; structure "0,1^2-"; splice_chain ",1010748^1010843-"; sources "Undefined,Undefined"; NMorMRNA "null"; degree "4"; dimension "2_2";
chr1	Undefined	as_event	1011089	1011585	.	+	.	transcript_id "MSTRG.193.1,MSTRG.193.2/Os01t0117900-01/Os01t0117900-02/Os01t0117900-03"; gene_id "chr1:1007434-1012400W"; flanks "1011089-,1011585^"; structure "0,1^2-"; splice_chain ",1011317^1011427-"; sources "Undefined,Undefined"; NMorMRNA "null"; degree "4"; dimension "2_2";
chr1	Undefined	as_event	1025497	1025850	.	+	.	transcript_id "Os01t0118100-01,MSTRG.199.1"; gene_id "chr1:1024186-1030112W"; flanks "1025497^,1025850^"; structure "1-,2-"; splice_chain "1025578-,1025585-"; sources "Undefined,Undefined"; NMorMRNA "null"; degree "4"; dimension "2_2";
chr1	Undefined	as_event	1050308	1050498	.	+	.	transcript_id "Os01t0118300-01,MSTRG.200.3"; gene_id "chr1:1046604-1053166W"; flanks "1050308-,1050498-"; structure "1^,2^"; splice_chain "1050371^,1050387^"; sources "Undefined,Undefined"; NMorMRNA "null"; degree "4"; dimension "2_2";
chr1	Undefined	as_event	1050387	1050624	.	+	.	transcript_id "MSTRG.200.3,Os01t0118300-02"; gene_id "chr1:1046604-1053166W"; flanks "1050387^,1050624^"; structure "1-,2-"; splice_chain "1050498-,1050508-"; sources "Undefined,Undefined"; NMorMRNA "null"; degree "4"; dimension "2_2";
chr1	Undefined	as_event	1050308	1050624	.	+	.	transcript_id "Os01t0118300-01,MSTRG.200.3,Os01t0118300-02"; gene_id "chr1:1046604-1053166W"; flanks "1050308-,1050624^"; structure "1^3-,2^3-,2^4-"; splice_chain "1050371^1050498-,1050387^1050498-,1050387^1050508-"; sources "Undefined,Undefined,Undefined"; NMorMRNA "null"; degree "9"; dimension "3_3";
chr1	Undefined	as_event	1183466	1183817	.	+	.	transcript_id "Os01t0121100-02,Os01t0121100-01"; gene_id "chr1:1183466-1186699W"; flanks "1183466[,1183817^"; structure "0,1^2-"; splice_chain ",1183545^1183751-"; sources "Undefined,Undefined"; NMorMRNA "null"; degree "4"; dimension "2_2";
chr1	Undefined	as_event	1183466	1184024	.	+	.	transcript_id "Os01t0121100-01,Os01t0121100-02,MSTRG.227.1"; gene_id "chr1:1183466-1186699W"; flanks "1183466[,1184024-"; structure "1^2-3^,3^,4^"; splice_chain "1183545^1183751-1183817^,1183817^,1183947^"; sources "Undefined,Undefined,Undefined"; NMorMRNA "null"; degree "9"; dimension "3_3";
chr1	Undefined	as_event	1338265	1338518	.	+	.	transcript_id "MSTRG.247.1,MSTRG.247.2"; gene_id "chr1:1338265-1338518W"; flanks "1338265[,1338518]"; structure "1^3-,2^4-"; splice_chain "1338363^1338411-,1338379^1338425-"; sources "Undefined,Undefined"; NMorMRNA "null"; degree "4"; dimension "2_2";
chr1	Undefined	as_event	1421711	1423289	.	+	.	transcript_id "MSTRG.263.2,MSTRG.263.3"; gene_id "chr1:1421693-1428051W"; flanks "1421711[,1423289-"; structure "1^,2^"; splice_chain "1421897^,1422041^"; sources "Undefined,Undefined"; NMorMRNA "null"; degree "4"; dimension "2_2";
chr1	Undefined	as_event	1425712	1425990	.	+	.	transcript_id "Os01t0125900-01,MSTRG.263.4"; gene_id "chr1:1421693-1428051W"; flanks "1425712^,1425990^"; structure "1-,2-"; splice_chain "1425788-,1425812-"; sources "Undefined,Undefined"; NMorMRNA "null"; degree "4"; dimension "2_2";
chr1	Undefined	as_event	1425568	1425990	.	+	.	transcript_id "MSTRG.263.2/MSTRG.263.3,Os01t0125900-01,MSTRG.263.4"; gene_id "chr1:1421693-1428051W"; flanks "1425568-,1425990^"; structure "0,1^2-,1^3-"; splice_chain ",1425712^1425788-,1425712^1425812-"; sources "Undefined,Undefined,Undefined"; NMorMRNA "null"; degree "9"; dimension "3_3";
chr1	Undefined	as_event	1508678	1508931	.	+	.	transcript_id "Os01t0127400-00,MSTRG.273.1/MSTRG.273.4"; gene_id "chr1:1508204-1510986W"; flanks "1508678^,1508931^"; structure "1-,2-"; splice_chain "1508803-,1508807-"; sources "Undefined,Undefined"; NMorMRNA "null"; degree "4"; dimension "2_2";
chr1	Undefined	as_event	1508807	1509076	.	+	.	transcript_id "MSTRG.273.1,MSTRG.273.2"; gene_id "chr1:1508204-1510986W"; flanks "1508807-,1509076-"; structure "1^,2^"; splice_chain "1508931^,1508968^"; sources "Undefined,Undefined"; NMorMRNA "null"; degree "4"; dimension "2_2";
chr1	Undefined	as_event	1508678	1509076	.	+	.	transcript_id "Os01t0127400-00,MSTRG.273.1,MSTRG.273.2"; gene_id "chr1:1508204-1510986W"; flanks "1508678^,1509076-"; structure "1-3^,2-3^,2-4^"; splice_chain "1508803-1508931^,1508807-1508931^,1508807-1508968^"; sources "Undefined,Undefined,Undefined"; NMorMRNA "null"; degree "9"; dimension "3_3";
chr1	Undefined	as_event	1508931	1509252	.	+	.	transcript_id "MSTRG.273.1/Os01t0127400-00,MSTRG.273.4"; gene_id "chr1:1508204-1510986W"; flanks "1508931^,1509252^"; structure "1-,2-"; splice_chain "1509076-,1509082-"; sources "Undefined,Undefined"; NMorMRNA "null"; degree "4"; dimension "2_2";
chr1	Undefined	as_event	1508807	1509252	.	+	.	transcript_id "MSTRG.273.1,MSTRG.273.4,MSTRG.273.2"; gene_id "chr1:1508204-1510986W"; flanks "1508807-,1509252^"; structure "1^3-,1^4-,2^3-"; splice_chain "1508931^1509076-,1508931^1509082-,1508968^1509076-"; sources "Undefined,Undefined,Undefined"; NMorMRNA "null"; degree "9"; dimension "3_3";
chr1	Undefined	as_event	1508678	1509252	.	+	.	transcript_id "Os01t0127400-00,MSTRG.273.1,MSTRG.273.4,MSTRG.273.2"; gene_id "chr1:1508204-1510986W"; flanks "1508678^,1509252^"; structure "1-3^5-,2-3^5-,2-3^6-,2-4^5-"; splice_chain "1508803-1508931^1509076-,1508807-1508931^1509076-,1508807-1508931^1509082-,1508807-1508968^1509076-"; sources "Undefined,Undefined,Undefined,Undefined"; NMorMRNA "null"; degree "16"; dimension "4_4";
chr1	Undefined	as_event	1519376	1520699	.	+	.	transcript_id "MSTRG.276.1/MSTRG.276.2,MSTRG.276.4"; gene_id "chr1:1518135-1521601W"; flanks "1519376^,1520699^"; structure "1-,2-"; splice_chain "1520462-,1520466-"; sources "Undefined,Undefined"; NMorMRNA "null"; degree "4"; dimension "2_2";
chr1	Undefined	as_event	1520699	1520946	.	+	.	transcript_id "MSTRG.276.1/MSTRG.276.4,MSTRG.276.2"; gene_id "chr1:1518135-1521601W"; flanks "1520699^,1520946^"; structure "1-,2-"; splice_chain "1520796-,1520813-"; sources "Undefined,Undefined"; NMorMRNA "null"; degree "4"; dimension "2_2";
chr1	Undefined	as_event	1518247	1520946	.	+	.	transcript_id "Os01t0127700-01,MSTRG.276.2"; gene_id "chr1:1518135-1521601W"; flanks "1518247[,1520946^"; structure "0,1^2-3^4-5^6-"; splice_chain ",1518612^1519166-1519376^1520462-1520699^1520813-"; sources "Undefined,Undefined"; NMorMRNA "null"; degree "4"; dimension "2_2";
chr1	Undefined	as_event	1538434	1539601	.	+	.	transcript_id "MSTRG.278.2,Os01t0127900-01"; gene_id "chr1:1534135-1539601W"; flanks "1538434-,1539601]"; structure "0,1^2-"; splice_chain ",1538700^1538947-"; sources "Undefined,Undefined"; NMorMRNA "null"; degree "4"; dimension "2_2";
chr1	Undefined	as_event	1600968	1601726	.	+	.	transcript_id "Os01t0128800-01,MSTRG.286.1"; gene_id "chr1:1598995-1605729W"; flanks "1600968-,1601726^"; structure "0,1^2-"; splice_chain ",1601093^1601583-"; sources "Undefined,Undefined"; NMorMRNA "null"; degree "4"; dimension "2_2";
chr1	Undefined	as_event	1608763	1617311	.	+	.	transcript_id "MSTRG.287.1,MSTRG.287.2"; gene_id "chr1:1608763-1617311W"; flanks "1608763[,1617311]"; structure "1^3-,2^4-"; splice_chain "1609043^1616331-,1609066^1616354-"; sources "Undefined,Undefined"; NMorMRNA "null"; degree "4"; dimension "2_2";
chr1	Undefined	as_event	1846610	1847188	.	+	.	transcript_id "MSTRG.326.2,Os01t0133400-01"; gene_id "chr1:1844263-1849102W"; flanks "1846610-,1847188^"; structure "0,1^2-"; splice_chain ",1846722^1847095-"; sources "Undefined,Undefined"; NMorMRNA "null"; degree "4"; dimension "2_2";
chr1	Undefined	as_event	1846404	1847188	.	+	.	transcript_id "MSTRG.326.3,MSTRG.326.2,Os01t0133400-01"; gene_id "chr1:1844263-1849102W"; flanks "1846404-,1847188^"; structure "0,1^2-,1^2-3^4-"; splice_chain ",1846503^1846610-,1846503^1846610-1846722^1847095-"; sources "Undefined,Undefined,Undefined"; NMorMRNA "null"; degree "9"; dimension "3_3";
chr1	Undefined	as_event	1851328	1851956	.	+	.	transcript_id "MSTRG.327.4,MSTRG.327.3/Os01t0133500-01/Os01t0133500-02"; gene_id "chr1:1849887-1856275W"; flanks "1851328^,1851956-"; structure "0,1-2^"; splice_chain ",1851690-1851765^"; sources "Undefined,Undefined"; NMorMRNA "null"; degree "4"; dimension "2_2";
chr1	Undefined	as_event	1853920	1854320	.	+	.	transcript_id "MSTRG.327.3/MSTRG.327.4/MSTRG.327.5,Os01t0133500-01/Os01t0133500-02"; gene_id "chr1:1849887-1856275W"; flanks "1853920-,1854320^"; structure "0,1^2-"; splice_chain ",1853965^1854211-"; sources "Undefined,Undefined"; NMorMRNA "null"; degree "4"; dimension "2_2";
chr1	Undefined	as_event	1903398	1904143	.	+	.	transcript_id "MSTRG.333.3,MSTRG.333.2"; gene_id "chr1:1902741-1905241W"; flanks "1903398[,1904143^"; structure "0,1^2-"; splice_chain ",1903887^1903983-"; sources "Undefined,Undefined"; NMorMRNA "null"; degree "4"; dimension "2_2";
chr1	Undefined	as_event	1904234	1905241	.	+	.	transcript_id "MSTRG.333.2,MSTRG.333.3"; gene_id "chr1:1902741-1905241W"; flanks "1904234-,1905241]"; structure "0,1^2-"; splice_chain ",1904531^1904619-"; sources "Undefined,Undefined"; NMorMRNA "null"; degree "4"; dimension "2_2";
chr1	Undefined	as_event	2023879	2036416	.	+	.	transcript_id "MSTRG.361.1,MSTRG.361.2"; gene_id "chr1:2023879-2038198W"; flanks "2023879[,2036416^"; structure "0,1^2-3^4-"; splice_chain ",2024802^2024894-2031849^2031940-"; sources "Undefined,Undefined"; NMorMRNA "null"; degree "4"; dimension "2_2";
chr1	Undefined	as_event	2049561	2050896	.	+	.	transcript_id "Os01t0138300-02,Os01t0138300-01"; gene_id "chr1:2048717-2052514W"; flanks "2049561^,2050896^"; structure "1-,2-"; splice_chain "2050861-,2050865-"; sources "Undefined,Undefined"; NMorMRNA "null"; degree "4"; dimension "2_2";
chr1	Undefined	as_event	2060962	2061388	.	+	.	transcript_id "Os01t0138500-01,MSTRG.370.2"; gene_id "chr1:2059309-2062436W"; flanks "2060962-,2061388^"; structure "1^3-,2^4-"; splice_chain "2061206^2061301-,2061208^2061303-"; sources "Undefined,Undefined"; NMorMRNA "null"; degree "4"; dimension "2_2";
chr1	Undefined	as_event	2133873	2134398	.	+	.	transcript_id "Os01t0140400-01,Os01t0140400-02"; gene_id "chr1:2131013-2137293W"; flanks "2133873-,2134398^"; structure "0,1^2-"; splice_chain ",2133944^2134330-"; sources "Undefined,Undefined"; NMorMRNA "null"; degree "4"; dimension "2_2";
chr1	Undefined	as_event	2245763	2246011	.	+	.	transcript_id "MSTRG.394.11,MSTRG.394.12"; gene_id "chr1:2245732-2250435W"; flanks "2245763[,2246011-"; structure "1^,2^"; splice_chain "2245910^,2245916^"; sources "Undefined,Undefined"; NMorMRNA "null"; degree "4"; dimension "2_2";
chr1	Undefined	as_event	2245753	2246011	.	+	.	transcript_id "MSTRG.394.4,MSTRG.394.5/MSTRG.394.7/MSTRG.394.8"; gene_id "chr1:2245732-2250435W"; flanks "2245753[,2246011-"; structure "1^,2^"; splice_chain "2245910^,2245916^"; sources "Undefined,Undefined"; NMorMRNA "null"; degree "4"; dimension "2_2";
chr1	Undefined	as_event	2245763	2246061	.	+	.	transcript_id "MSTRG.394.13,MSTRG.394.11,MSTRG.394.12"; gene_id "chr1:2245732-2250435W"; flanks "2245763[,2246061^"; structure "0,1^3-,2^3-"; splice_chain ",2245910^2246011-,2245916^2246011-"; sources "Undefined,Undefined,Undefined"; NMorMRNA "null"; degree "9"; dimension "3_3";
chr1	Undefined	as_event	2245757	2246061	.	+	.	transcript_id "MSTRG.394.10,MSTRG.394.9"; gene_id "chr1:2245732-2250435W"; flanks "2245757[,2246061^"; structure "0,1^2-"; splice_chain ",2245910^2246011-"; sources "Undefined,Undefined"; NMorMRNA "null"; degree "4"; dimension "2_2";
chr1	Undefined	as_event	2245753	2246061	.	+	.	transcript_id "MSTRG.394.6,MSTRG.394.4,MSTRG.394.5/MSTRG.394.8"; gene_id "chr1:2245732-2250435W"; flanks "2245753[,2246061^"; structure "0,1^3-,2^3-"; splice_chain ",2245910^2246011-,2245916^2246011-"; sources "Undefined,Undefined,Undefined"; NMorMRNA "null"; degree "9"; dimension "3_3";
chr1	Undefined	as_event	2246061	2246322	.	+	.	transcript_id "MSTRG.394.12,MSTRG.394.1/MSTRG.394.10/MSTRG.394.11/MSTRG.394.13/MSTRG.394.2/MSTRG.394.4/MSTRG.394.5/MSTRG.394.6/MSTRG.394.8/MSTRG.394.9/Os01t0141600-01"; gene_id "chr1:2245732-2250435W"; flanks "2246061^,2246322^"; structure "1-,2-"; splice_chain "2246136-,2246174-"; sources "Undefined,Undefined"; NMorMRNA "null"; degree "4"; dimension "2_2";
chr1	Undefined	as_event	2246011	2246322	.	+	.	transcript_id "MSTRG.394.7,MSTRG.394.12,MSTRG.394.1/MSTRG.394.11/MSTRG.394.2/MSTRG.394.4/MSTRG.394.5/MSTRG.394.8/MSTRG.394.9/Os01t0141600-01"; gene_id "chr1:2245732-2250435W"; flanks "2246011-,2246322^"; structure "0,1^2-,1^3-"; splice_chain ",2246061^2246136-,2246061^2246174-"; sources "Undefined,Undefined,Undefined"; NMorMRNA "null"; degree "9"; dimension "3_3";
chr1	Undefined	as_event	2245753	2246322	.	+	.	transcript_id "MSTRG.394.4,MSTRG.394.7,MSTRG.394.5/MSTRG.394.8,MSTRG.394.6"; gene_id "chr1:2245732-2250435W"; flanks "2245753[,2246322^"; structure "1^3-4^5-,2^3-,2^3-4^5-,4^5-"; splice_chain "2245910^2246011-2246061^2246174-,2245916^2246011-,2245916^2246011-2246061^2246174-,2246061^2246174-"; sources "Undefined,Undefined,Undefined,Undefined"; NMorMRNA "null"; degree "16"; dimension "4_4";
chr1	Undefined	as_event	2246970	2247385	.	+	.	transcript_id "MSTRG.394.7,MSTRG.394.1/MSTRG.394.10/MSTRG.394.2/MSTRG.394.4/MSTRG.394.5/MSTRG.394.8/MSTRG.394.9/Os01t0141600-01"; gene_id "chr1:2245732-2250435W"; flanks "2246970^,2247385^"; structure "1-,2-"; splice_chain "2247317-,2247327-"; sources "Undefined,Undefined"; NMorMRNA "null"; degree "4"; dimension "2_2";
chr1	Undefined	as_event	2247327	2247809	.	+	.	transcript_id "MSTRG.394.6,MSTRG.394.1/MSTRG.394.10/MSTRG.394.8/Os01t0141600-01"; gene_id "chr1:2245732-2250435W"; flanks "2247327-,2247809^"; structure "0,1^2-"; splice_chain ",2247385^2247763-"; sources "Undefined,Undefined"; NMorMRNA "null"; degree "4"; dimension "2_2";
chr1	Undefined	as_event	2247317	2247809	.	+	.	transcript_id "MSTRG.394.13,MSTRG.394.7"; gene_id "chr1:2245732-2250435W"; flanks "2247317-,2247809^"; structure "0,1^2-"; splice_chain ",2247385^2247763-"; sources "Undefined,Undefined"; NMorMRNA "null"; degree "4"; dimension "2_2";
chr1	Undefined	as_event	2246970	2247809	.	+	.	transcript_id "MSTRG.394.13,MSTRG.394.7,MSTRG.394.6,MSTRG.394.1/MSTRG.394.10/MSTRG.394.8/Os01t0141600-01"; gene_id "chr1:2245732-2250435W"; flanks "2246970^,2247809^"; structure "1-,1-3^4-,2-,2-3^4-"; splice_chain "2247317-,2247317-2247385^2247763-,2247327-,2247327-2247385^2247763-"; sources "Undefined,Undefined,Undefined,Undefined"; NMorMRNA "null"; degree "16"; dimension "4_4";
chr1	Undefined	as_event	2247763	2247952	.	+	.	transcript_id "MSTRG.394.1/Os01t0141600-01,MSTRG.394.2/MSTRG.394.4"; gene_id "chr1:2245732-2250435W"; flanks "2247763-,2247952-"; structure "1^,2^"; splice_chain "2247809^,2247862^"; sources "Undefined,Undefined"; NMorMRNA "null"; degree "4"; dimension "2_2";
chr1	Undefined	as_event	2247385	2247952	.	+	.	transcript_id "MSTRG.394.5/MSTRG.394.9,MSTRG.394.1/Os01t0141600-01,MSTRG.394.2/MSTRG.394.4"; gene_id "chr1:2245732-2250435W"; flanks "2247385^,2247952-"; structure "0,1-2^,1-3^"; splice_chain ",2247763-2247809^,2247763-2247862^"; sources "Undefined,Undefined,Undefined"; NMorMRNA "null"; degree "9"; dimension "3_3";
chr1	Undefined	as_event	2247809	2248030	.	+	.	transcript_id "MSTRG.394.10/MSTRG.394.13/MSTRG.394.6/MSTRG.394.7/MSTRG.394.8,MSTRG.394.1/Os01t0141600-01"; gene_id "chr1:2245732-2250435W"; flanks "2247809^,2248030^"; structure "1-,2-"; splice_chain "2247897-,2247952-"; sources "Undefined,Undefined"; NMorMRNA "null"; degree "4"; dimension "2_2";
chr1	Undefined	as_event	2247763	2248030	.	+	.	transcript_id "MSTRG.394.10/MSTRG.394.7/MSTRG.394.8,MSTRG.394.1/Os01t0141600-01,MSTRG.394.2/MSTRG.394.4"; gene_id "chr1:2245732-2250435W"; flanks "2247763-,2248030^"; structure "1^3-,1^4-,2^4-"; splice_chain "2247809^2247897-,2247809^2247952-,2247862^2247952-"; sources "Undefined,Undefined,Undefined"; NMorMRNA "null"; degree "9"; dimension "3_3";
chr1	Undefined	as_event	2247385	2248030	.	+	.	transcript_id "MSTRG.394.10/MSTRG.394.7/MSTRG.394.8,MSTRG.394.1/Os01t0141600-01,MSTRG.394.2/MSTRG.394.4,MSTRG.394.5/MSTRG.394.9"; gene_id "chr1:2245732-2250435W"; flanks "2247385^,2248030^"; structure "1-2^4-,1-2^5-,1-3^5-,5-"; splice_chain "2247763-2247809^2247897-,2247763-2247809^2247952-,2247763-2247862^2247952-,2247952-"; sources "Undefined,Undefined,Undefined,Undefined"; NMorMRNA "null"; deg…
chr1	Undefined	as_event	2247327	2248030	.	+	.	transcript_id "MSTRG.394.11,MSTRG.394.10/MSTRG.394.8,MSTRG.394.1/Os01t0141600-01,MSTRG.394.2/MSTRG.394.4,MSTRG.394.5/MSTRG.394.9,MSTRG.394.6"; gene_id "chr1:2245732-2250435W"; flanks "2247327-,2248030^"; structure "0,1^2-3^5-,1^2-3^6-,1^2-4^6-,1^6-,3^5-"; splice_chain ",2247385^2247763-2247809^2247897-,2247385^2247763-2247809^2247952-,2247385^2247763-2247862^2247952-,2247385^2247952-,2247809^2247…
chr1	Undefined	as_event	2247317	2248030	.	+	.	transcript_id "MSTRG.394.12,MSTRG.394.7,MSTRG.394.13"; gene_id "chr1:2245732-2250435W"; flanks "2247317-,2248030^"; structure "0,1^2-3^4-,3^4-"; splice_chain ",2247385^2247763-2247809^2247897-,2247809^2247897-"; sources "Undefined,Undefined,Undefined"; NMorMRNA "null"; degree "9"; dimension "3_3";
chr1	Undefined	as_event	2246970	2248030	.	+	.	transcript_id "MSTRG.394.12,MSTRG.394.7,MSTRG.394.13,MSTRG.394.11,MSTRG.394.10/MSTRG.394.8,MSTRG.394.1/Os01t0141600-01,MSTRG.394.2/MSTRG.394.4,MSTRG.394.5/MSTRG.394.9,MSTRG.394.6"; gene_id "chr1:2245732-2250435W"; flanks "2246970^,2248030^"; structure "1-,1-3^4-5^7-,1-5^7-,2-,2-3^4-5^7-,2-3^4-5^8-,2-3^4-6^8-,2-3^8-,2-5^7-"; splice_chain "2247317-,2247317-2247385^2247763-2247809^2247897-,2247317-2…
chr1	Undefined	as_event	2248881	2249128	.	+	.	transcript_id "MSTRG.394.1/MSTRG.394.12/MSTRG.394.2/MSTRG.394.4/MSTRG.394.5/MSTRG.394.7/MSTRG.394.8/MSTRG.394.9,MSTRG.394.11/MSTRG.394.6/Os01t0141600-01"; gene_id "chr1:2245732-2250435W"; flanks "2248881-,2249128-"; structure "1^,2^"; splice_chain "2248994^,2248999^"; sources "Undefined,Undefined"; NMorMRNA "null"; degree "4"; dimension "2_2";
chr1	Undefined	as_event	2248881	2249188	.	+	.	transcript_id "MSTRG.394.10/MSTRG.394.13,MSTRG.394.1/MSTRG.394.12/MSTRG.394.2/MSTRG.394.4/MSTRG.394.5/MSTRG.394.7/MSTRG.394.8/MSTRG.394.9,MSTRG.394.11/MSTRG.394.6/Os01t0141600-01"; gene_id "chr1:2245732-2250435W"; flanks "2248881-,2249188^"; structure "0,1^3-,2^3-"; splice_chain ",2248994^2249128-,2248999^2249128-"; sources "Undefined,Undefined,Undefined"; NMorMRNA "null"; degree "9"; dimension "…
chr1	Undefined	as_event	2387698	2387892	.	+	.	transcript_id "MSTRG.418.2,Os01t0144200-01"; gene_id "chr1:2386373-2388599W"; flanks "2387698-,2387892^"; structure "0,1^2-"; splice_chain ",2387752^2387830-"; sources "Undefined,Undefined"; NMorMRNA "null"; degree "4"; dimension "2_2";
chr1	Undefined	as_event	2403684	2404337	.	+	.	transcript_id "MSTRG.423.1/Os01t0144600-01,MSTRG.423.2/MSTRG.423.3"; gene_id "chr1:2403203-2408051W"; flanks "2403684^,2404337^"; structure "1-,2-"; splice_chain "2404256-,2404261-"; sources "Undefined,Undefined"; NMorMRNA "null"; degree "4"; dimension "2_2";
chr1	Undefined	as_event	2404337	2406694	.	+	.	transcript_id "MSTRG.423.3,MSTRG.423.1"; gene_id "chr1:2403203-2408051W"; flanks "2404337^,2406694^"; structure "1-,2-3^4-"; splice_chain "2404409-,2404417-2404502^2405435-"; sources "Undefined,Undefined"; NMorMRNA "null"; degree "4"; dimension "2_2";
chr1	Undefined	as_event	2715009	2715908	.	+	.	transcript_id "Os01t0150100-01,MSTRG.460.1/MSTRG.460.2"; gene_id "chr1:2713066-2721203W"; flanks "2715009-,2715908^"; structure "0,1^2-3^4-"; splice_chain ",2715148^2715690-2715745^2715832-"; sources "Undefined,Undefined"; NMorMRNA "null"; degree "4"; dimension "2_2";
chr1	Undefined	as_event	2716052	2716345	.	+	.	transcript_id "MSTRG.460.2,MSTRG.460.1/Os01t0150100-01"; gene_id "chr1:2713066-2721203W"; flanks "2716052^,2716345^"; structure "1-,2-"; splice_chain "2716213-,2716221-"; sources "Undefined,Undefined"; NMorMRNA "null"; degree "4"; dimension "2_2";
chr1	Undefined	as_event	2772681	2773088	.	+	.	transcript_id "Os01t0151200-02,MSTRG.475.2/Os01t0151200-01"; gene_id "chr1:2770142-2774609W"; flanks "2772681-,2773088^"; structure "1^4-5^6-,2^3-"; splice_chain "2772742^2773049-2773054^2773062-,2772784^2772939-"; sources "Undefined,Undefined"; NMorMRNA "null"; degree "4"; dimension "2_2";
chr1	Undefined	as_event	2773286	2773580	.	+	.	transcript_id "MSTRG.475.2,Os01t0151200-01/Os01t0151200-02/Os01t0151200-03"; gene_id "chr1:2770142-2774609W"; flanks "2773286^,2773580^"; structure "1-,2-"; splice_chain "2773435-,2773438-"; sources "Undefined,Undefined"; NMorMRNA "null"; degree "4"; dimension "2_2";
chr1	Undefined	as_event	2793969	2794172	.	+	.	transcript_id "MSTRG.478.1,Os01t0151600-01"; gene_id "chr1:2791418-2795857W"; flanks "2793969-,2794172^"; structure "0,1^2-"; splice_chain ",2794025^2794118-"; sources "Undefined,Undefined"; NMorMRNA "null"; degree "4"; dimension "2_2";
chr1	Undefined	as_event	2876390	2877030	.	+	.	transcript_id "MSTRG.504.3,MSTRG.504.1"; gene_id "chr1:2873607-2882523W"; flanks "2876390^,2877030^"; structure "1-,2-"; splice_chain "2876955-,2876959-"; sources "Undefined,Undefined"; NMorMRNA "null"; degree "4"; dimension "2_2";
chr1	Undefined	as_event	2876279	2877030	.	+	.	transcript_id "MSTRG.504.2,MSTRG.504.3,MSTRG.504.1"; gene_id "chr1:2873607-2882523W"; flanks "2876279-,2877030^"; structure "0,1^2-,1^3-"; splice_chain ",2876390^2876955-,2876390^2876959-"; sources "Undefined,Undefined,Undefined"; NMorMRNA "null"; degree "9"; dimension "3_3";
chr1	Undefined	as_event	2877030	2877696	.	+	.	transcript_id "MSTRG.504.1,MSTRG.504.2/MSTRG.504.3"; gene_id "chr1:2873607-2882523W"; flanks "2877030^,2877696^"; structure "1-,2-"; splice_chain "2877605-,2877609-"; sources "Undefined,Undefined"; NMorMRNA "null"; degree "4"; dimension "2_2";
chr1	Undefined	as_event	2982542	2982851	.	+	.	transcript_id "MSTRG.516.1,Os01t0155500-01"; gene_id "chr1:2982542-2986323W"; flanks "2982542[,2982851^"; structure "0,1^2-"; splice_chain ",2982649^2982803-"; sources "Undefined,Undefined"; NMorMRNA "null"; degree "4"; dimension "2_2";
chr1	Undefined	as_event	3049355	3049738	.	+	.	transcript_id "MSTRG.524.2/Os01t0158000-01/Os01t0158000-02,MSTRG.524.4"; gene_id "chr1:3047432-3052194W"; flanks "3049355^,3049738^"; structure "1-,2-"; splice_chain "3049554-,3049559-"; sources "Undefined,Undefined"; NMorMRNA "null"; degree "4"; dimension "2_2";
chr1	Undefined	as_event	3050433	3051279	.	+	.	transcript_id "MSTRG.524.2,MSTRG.524.4/Os01t0158000-01/Os01t0158000-02"; gene_id "chr1:3047432-3052194W"; flanks "3050433-,3051279^"; structure "0,1^2-3^4-"; splice_chain ",3050583^3051015-3051096^3051221-"; sources "Undefined,Undefined"; NMorMRNA "null"; degree "4"; dimension "2_2";
chr1	Undefined	as_event	3054481	3055028	.	+	.	transcript_id "MSTRG.526.2,Os01t0158200-01"; gene_id "chr1:3054481-3057243W"; flanks "3054481[,3055028-"; structure "1^,2^"; splice_chain "3054904^,3054939^"; sources "Undefined,Undefined"; NMorMRNA "null"; degree "4"; dimension "2_2";
chr1	Undefined	as_event	3054481	3055123	.	+	.	transcript_id "MSTRG.526.1,MSTRG.526.2,Os01t0158200-01"; gene_id "chr1:3054481-3057243W"; flanks "3054481[,3055123^"; structure "0,1^3-,2^3-"; splice_chain ",3054904^3055028-,3054939^3055028-"; sources "Undefined,Undefined,Undefined"; NMorMRNA "null"; degree "9"; dimension "3_3";
chr1	Undefined	as_event	3062542	3062695	.	+	.	transcript_id "MSTRG.528.1/Os01t0158500-01,MSTRG.528.3"; gene_id "chr1:3060840-3066208W"; flanks "3062542^,3062695^"; structure "1-,2-"; splice_chain "3062615-,3062655-"; sources "Undefined,Undefined"; NMorMRNA "null"; degree "4"; dimension "2_2";
chr1	Undefined	as_event	3063219	3063492	.	+	.	transcript_id "MSTRG.528.1/MSTRG.528.3,Os01t0158500-01"; gene_id "chr1:3060840-3066208W"; flanks "3063219-,3063492^"; structure "1^3-,2^4-"; splice_chain "3063302^3063388-,3063306^3063392-"; sources "Undefined,Undefined"; NMorMRNA "null"; degree "4"; dimension "2_2";
chr1	Undefined	as_event	3129235	3130649	.	+	.	transcript_id "Os01t0159800-01,MSTRG.539.1"; gene_id "chr1:3129056-3130722W"; flanks "3129235-,3130649]"; structure "0,1^2-"; splice_chain ",3129573^3129967-"; sources "Undefined,Undefined"; NMorMRNA "null"; degree "4"; dimension "2_2";
chr1	Undefined	as_event	3327024	3327190	.	+	.	transcript_id "MSTRG.573.1,MSTRG.573.3/MSTRG.573.4"; gene_id "chr1:3324235-3328571W"; flanks "3327024^,3327190^"; structure "1-,2-"; splice_chain "3327141-,3327147-"; sources "Undefined,Undefined"; NMorMRNA "null"; degree "4"; dimension "2_2";
chr1	Undefined	as_event	3327306	3328319	.	+	.	transcript_id "MSTRG.573.3,MSTRG.573.4"; gene_id "chr1:3324235-3328571W"; flanks "3327306-,3328319]"; structure "0,1^2-"; splice_chain ",3327345^3327723-"; sources "Undefined,Undefined"; NMorMRNA "null"; degree "4"; dimension "2_2";
chr1	Undefined	as_event	3337911	3338423	.	+	.	transcript_id "Os01t0164700-01,MSTRG.577.2"; gene_id "chr1:3336250-3343221W"; flanks "3337911-,3338423^"; structure "0,1^2-"; splice_chain ",3337989^3338342-"; sources "Undefined,Undefined"; NMorMRNA "null"; degree "4"; dimension "2_2";
chr1	Undefined	as_event	3338423	3338976	.	+	.	transcript_id "MSTRG.577.2/MSTRG.577.4/Os01t0164700-01,MSTRG.577.3"; gene_id "chr1:3336250-3343221W"; flanks "3338423^,3338976^"; structure "1-,2-"; splice_chain "3338820-,3338830-"; sources "Undefined,Undefined"; NMorMRNA "null"; degree "4"; dimension "2_2";
chr1	Undefined	as_event	3338976	3339600	.	+	.	transcript_id "MSTRG.577.4,MSTRG.577.2/MSTRG.577.3/Os01t0164700-01"; gene_id "chr1:3336250-3343221W"; flanks "3338976^,3339600^"; structure "1-,2-"; splice_chain "3339490-,3339510-"; sources "Undefined,Undefined"; NMorMRNA "null"; degree "4"; dimension "2_2";
chr1	Undefined	as_event	3339745	3340257	.	+	.	transcript_id "Os01t0164700-01,MSTRG.577.2/MSTRG.577.3/MSTRG.577.4"; gene_id "chr1:3336250-3343221W"; flanks "3339745-,3340257^"; structure "0,1^2-"; splice_chain ",3339828^3340211-"; sources "Undefined,Undefined"; NMorMRNA "null"; degree "4"; dimension "2_2";
chr1	Undefined	as_event	3398787	3399095	.	+	.	transcript_id "MSTRG.587.2,Os01t0166100-01"; gene_id "chr1:3397441-3400487W"; flanks "3398787^,3399095^"; structure "1-,2-"; splice_chain "3398900-,3398908-"; sources "Undefined,Undefined"; NMorMRNA "null"; degree "4"; dimension "2_2";
chr1	Undefined	as_event	3405565	3406447	.	+	.	transcript_id "Os01t0166400-01,Os01t0166400-02"; gene_id "chr1:3405466-3408694W"; flanks "3405565^,3406447^"; structure "1-,2-3^4-"; splice_chain "3405756-,3405813-3406069^3406363-"; sources "Undefined,Undefined"; NMorMRNA "null"; degree "4"; dimension "2_2";
chr1	Undefined	as_event	3406626	3407136	.	+	.	transcript_id "Os01t0166400-01,Os01t0166400-02"; gene_id "chr1:3405466-3408694W"; flanks "3406626-,3407136^"; structure "0,1^2-"; splice_chain ",3406680^3406998-"; sources "Undefined,Undefined"; NMorMRNA "null"; degree "4"; dimension "2_2";
chr1	Undefined	as_event	3513846	3514435	.	+	.	transcript_id "Os01t0168600-01,MSTRG.610.1"; gene_id "chr1:3511827-3515900W"; flanks "3513846-,3514435^"; structure "0,1^2-"; splice_chain ",3514135^3514231-"; sources "Undefined,Undefined"; NMorMRNA "null"; degree "4"; dimension "2_2";
chr1	Undefined	as_event	3610431	3610905	.	+	.	transcript_id "MSTRG.625.3,MSTRG.625.1"; gene_id "chr1:3609619-3615657W"; flanks "3610431^,3610905-"; structure "0,1-2^"; splice_chain ",3610518-3610581^"; sources "Undefined,Undefined"; NMorMRNA "null"; degree "4"; dimension "2_2";
chr1	Undefined	as_event	3610431	3610908	.	+	.	transcript_id "MSTRG.625.2,MSTRG.625.4"; gene_id "chr1:3609619-3615657W"; flanks "3610431^,3610908-"; structure "0,1-2^"; splice_chain ",3610518-3610581^"; sources "Undefined,Undefined"; NMorMRNA "null"; degree "4"; dimension "2_2";
chr1	Undefined	as_event	3610581	3610965	.	+	.	transcript_id "MSTRG.625.1,MSTRG.625.4"; gene_id "chr1:3609619-3615657W"; flanks "3610581^,3610965^"; structure "1-,2-"; splice_chain "3610905-,3610908-"; sources "Undefined,Undefined"; NMorMRNA "null"; degree "4"; dimension "2_2";
chr1	Undefined	as_event	3610431	3610965	.	+	.	transcript_id "MSTRG.625.1,MSTRG.625.4,MSTRG.625.3,MSTRG.625.2"; gene_id "chr1:3609619-3615657W"; flanks "3610431^,3610965^"; structure "1-2^3-,1-2^4-,3-,4-"; splice_chain "3610518-3610581^3610905-,3610518-3610581^3610908-,3610905-,3610908-"; sources "Undefined,Undefined,Undefined,Undefined"; NMorMRNA "null"; degree "16"; dimension "4_4";
chr1	Undefined	as_event	3647958	3649086	.	+	.	transcript_id "MSTRG.628.1/MSTRG.628.7/Os01t0170600-02,MSTRG.628.4/MSTRG.628.5,MSTRG.628.6"; gene_id "chr1:3645508-3650691W"; flanks "3647958-,3649086^"; structure "0,1^2-,3^4-"; splice_chain ",3648103^3648697-,3648870^3648987-"; sources "Undefined,Undefined,Undefined"; NMorMRNA "null"; degree "9"; dimension "3_3";
chr1	Undefined	as_event	3649086	3649448	.	+	.	transcript_id "Os01t0170600-02,MSTRG.628.1/MSTRG.628.4/MSTRG.628.6,MSTRG.628.5/MSTRG.628.7"; gene_id "chr1:3645508-3650691W"; flanks "3649086^,3649448^"; structure "1-,2-,3-"; splice_chain "3649166-,3649255-,3649262-"; sources "Undefined,Undefined,Undefined"; NMorMRNA "null"; degree "9"; dimension "3_3";
chr1	Undefined	as_event	3711212	3711779	.	+	.	transcript_id "Os01t0172100-01,MSTRG.634.1"; gene_id "chr1:3711212-3713653W"; flanks "3711212[,3711779^"; structure "0,1^2-"; splice_chain ",3711281^3711383-"; sources "Undefined,Undefined"; NMorMRNA "null"; degree "4"; dimension "2_2";
chr1	Undefined	as_event	3953295	3953984	.	+	.	transcript_id "MSTRG.683.1,Os01t0176700-01"; gene_id "chr1:3952690-3955575W"; flanks "3953295-,3953984^"; structure "0,1^2-"; splice_chain ",3953618^3953703-"; sources "Undefined,Undefined"; NMorMRNA "null"; degree "4"; dimension "2_2";
chr1	Undefined	as_event	3977830	3978871	.	+	.	transcript_id "Os01t0177100-02,Os01t0177100-01"; gene_id "chr1:3975173-3984909W"; flanks "3977830^,3978871^"; structure "1-,2-"; splice_chain "3978518-,3978524-"; sources "Undefined,Undefined"; NMorMRNA "null"; degree "4"; dimension "2_2";
chr1	Undefined	as_event	3988190	3989116	.	+	.	transcript_id "MSTRG.689.1/MSTRG.689.2/MSTRG.689.4,Os01t0177200-01"; gene_id "chr1:3986647-4003665W"; flanks "3988190^,3989116^"; structure "1-,2-"; splice_chain "3989017-,3989022-"; sources "Undefined,Undefined"; NMorMRNA "null"; degree "4"; dimension "2_2";
chr1	Undefined	as_event	3991567	3991699	.	+	.	transcript_id "MSTRG.689.2/Os01t0177200-01,MSTRG.689.1"; gene_id "chr1:3986647-4003665W"; flanks "3991567^,3991699^"; structure "1-,2-"; splice_chain "3991642-,3991647-"; sources "Undefined,Undefined"; NMorMRNA "null"; degree "4"; dimension "2_2";
chr1	Undefined	as_event	3991642	3991892	.	+	.	transcript_id "MSTRG.689.4,MSTRG.689.2/Os01t0177200-01"; gene_id "chr1:3986647-4003665W"; flanks "3991642-,3991892^"; structure "0,1^2-"; splice_chain ",3991699^3991770-"; sources "Undefined,Undefined"; NMorMRNA "null"; degree "4"; dimension "2_2";
chr1	Undefined	as_event	3991567	3991892	.	+	.	transcript_id "MSTRG.689.4,MSTRG.689.2/Os01t0177200-01,MSTRG.689.1"; gene_id "chr1:3986647-4003665W"; flanks "3991567^,3991892^"; structure "1-,1-3^4-,2-3^4-"; splice_chain "3991642-,3991642-3991699^3991770-,3991647-3991699^3991770-"; sources "Undefined,Undefined,Undefined"; NMorMRNA "null"; degree "9"; dimension "3_3";
chr1	Undefined	as_event	4059878	4060644	.	+	.	transcript_id "MSTRG.695.3/MSTRG.695.4/MSTRG.695.6,MSTRG.695.7"; gene_id "chr1:4059510-4063188W"; flanks "4059878^,4060644^"; structure "1-,2-"; splice_chain "4059978-,4060485-"; sources "Undefined,Undefined"; NMorMRNA "null"; degree "4"; dimension "2_2";
chr1	Undefined	as_event	4059510	4060644	.	+	.	transcript_id "MSTRG.695.5,MSTRG.695.3/MSTRG.695.4/MSTRG.695.6,MSTRG.695.7"; gene_id "chr1:4059510-4063188W"; flanks "4059510[,4060644^"; structure "0,1^2-,1^3-"; splice_chain ",4059878^4059978-,4059878^4060485-"; sources "Undefined,Undefined,Undefined"; NMorMRNA "null"; degree "9"; dimension "3_3";
chr1	Undefined	as_event	4059878	4060652	.	+	.	transcript_id "MSTRG.695.2,MSTRG.695.1,Os01t0178100-01"; gene_id "chr1:4059510-4063188W"; flanks "4059878^,4060652^"; structure "1-,2-,3-"; splice_chain "4059978-,4060027-,4060485-"; sources "Undefined,Undefined,Undefined"; NMorMRNA "null"; degree "9"; dimension "3_3";
chr1	Undefined	as_event	4060485	4061306	.	+	.	transcript_id "MSTRG.695.7,Os01t0178100-01"; gene_id "chr1:4059510-4063188W"; flanks "4060485-,4061306-"; structure "1^,2^"; splice_chain "4060644^,4060652^"; sources "Undefined,Undefined"; NMorMRNA "null"; degree "4"; dimension "2_2";
chr1	Undefined	as_event	4059978	4061306	.	+	.	transcript_id "MSTRG.695.3/MSTRG.695.4/MSTRG.695.6,MSTRG.695.2"; gene_id "chr1:4059510-4063188W"; flanks "4059978-,4061306-"; structure "1^,2^"; splice_chain "4060644^,4060652^"; sources "Undefined,Undefined"; NMorMRNA "null"; degree "4"; dimension "2_2";
chr1	Undefined	as_event	4059878	4061306	.	+	.	transcript_id "MSTRG.695.3/MSTRG.695.4/MSTRG.695.6,MSTRG.695.2,MSTRG.695.1,MSTRG.695.7,Os01t0178100-01"; gene_id "chr1:4059510-4063188W"; flanks "4059878^,4061306-"; structure "1-4^,1-5^,2-5^,3-4^,3-5^"; splice_chain "4059978-4060644^,4059978-4060652^,4060027-4060652^,4060485-4060644^,4060485-4060652^"; sources "Undefined,Undefined,Undefined,Undefined,Undefined"; NMorMRNA "null"; degree "25"; dim…
chr1	Undefined	as_event	4059510	4061306	.	+	.	transcript_id "MSTRG.695.3/MSTRG.695.4/MSTRG.695.6,MSTRG.695.2,MSTRG.695.1,MSTRG.695.7,Os01t0178100-01,MSTRG.695.5"; gene_id "chr1:4059510-4063188W"; flanks "4059510[,4061306-"; structure "1^2-5^,1^2-6^,1^3-6^,1^4-5^,1^4-6^,5^"; splice_chain "4059878^4059978-4060644^,4059878^4059978-4060652^,4059878^4060027-4060652^,4059878^4060485-4060644^,4059878^4060485-4060652^,4060644^"; sources "Undefined,U…
chr1	Undefined	as_event	4061552	4062275	.	+	.	transcript_id "MSTRG.695.5/MSTRG.695.6,MSTRG.695.1/MSTRG.695.2/MSTRG.695.3/Os01t0178100-01"; gene_id "chr1:4059510-4063188W"; flanks "4061552^,4062275^"; structure "1-,2-"; splice_chain "4062126-,4062129-"; sources "Undefined,Undefined"; NMorMRNA "null"; degree "4"; dimension "2_2";
chr1	Undefined	as_event	4062126	4062626	.	+	.	transcript_id "MSTRG.695.4/MSTRG.695.7,MSTRG.695.5/MSTRG.695.6"; gene_id "chr1:4059510-4063188W"; flanks "4062126-,4062626^"; structure "0,1^2-"; splice_chain ",4062275^4062355-"; sources "Undefined,Undefined"; NMorMRNA "null"; degree "4"; dimension "2_2";
chr1	Undefined	as_event	4061552	4062626	.	+	.	transcript_id "MSTRG.695.4/MSTRG.695.7,MSTRG.695.5/MSTRG.695.6,MSTRG.695.1/MSTRG.695.2/MSTRG.695.3/Os01t0178100-01"; gene_id "chr1:4059510-4063188W"; flanks "4061552^,4062626^"; structure "1-,1-3^4-,2-3^4-"; splice_chain "4062126-,4062126-4062275^4062355-,4062129-4062275^4062355-"; sources "Undefined,Undefined,Undefined"; NMorMRNA "null"; degree "9"; dimension "3_3";
chr1	Undefined	as_event	4063722	4064447	.	+	.	transcript_id "MSTRG.696.1/MSTRG.696.3,MSTRG.696.2"; gene_id "chr1:4063722-4066349W"; flanks "4063722[,4064447^"; structure "0,1^2-"; splice_chain ",4064234^4064334-"; sources "Undefined,Undefined"; NMorMRNA "null"; degree "4"; dimension "2_2";
chr1	Undefined	as_event	4064447	4065195	.	+	.	transcript_id "MSTRG.696.3/MSTRG.696.4,Os01t0178200-00"; gene_id "chr1:4063722-4066349W"; flanks "4064447^,4065195-"; structure "0,1-2^"; splice_chain ",4064614-4064707^"; sources "Undefined,Undefined"; NMorMRNA "null"; degree "4"; dimension "2_2";
chr1	Undefined	as_event	4064447	4065440	.	+	.	transcript_id "Os01t0178200-00,MSTRG.696.3/MSTRG.696.4,MSTRG.696.1/MSTRG.696.2"; gene_id "chr1:4063722-4066349W"; flanks "4064447^,4065440^"; structure "1-2^3-,3-,4-"; splice_chain "4064614-4064707^4065195-,4065195-,4065218-"; sources "Undefined,Undefined,Undefined"; NMorMRNA "null"; degree "9"; dimension "3_3";
chr1	Undefined	as_event	4120609	4120860	.	+	.	transcript_id "MSTRG.707.1,MSTRG.707.2/Os01t0179200-01"; gene_id "chr1:4118041-4122507W"; flanks "4120609^,4120860^"; structure "1-,2-"; splice_chain "4120668-,4120691-"; sources "Undefined,Undefined"; NMorMRNA "null"; degree "4"; dimension "2_2";
chr1	Undefined	as_event	4130987	4132152	.	+	.	transcript_id "Os01t0179400-01,MSTRG.709.1"; gene_id "chr1:4126993-4140749W"; flanks "4130987-,4132152^"; structure "1^3-5^7-,2^4-6^8-"; splice_chain "4131123^4131219-4131284^4131924-,4131127^4131223-4131285^4131925-"; sources "Undefined,Undefined"; NMorMRNA "null"; degree "4"; dimension "2_2";
chr1	Undefined	as_event	4132250	4133157	.	+	.	transcript_id "Os01t0179400-01,MSTRG.709.1"; gene_id "chr1:4126993-4140749W"; flanks "4132250-,4133157^"; structure "1^3-,2^4-"; splice_chain "4132331^4132998-,4132333^4133000-"; sources "Undefined,Undefined"; NMorMRNA "null"; degree "4"; dimension "2_2";
chr1	Undefined	as_event	4139260	4139558	.	+	.	transcript_id "MSTRG.709.1/Os01t0179400-01,MSTRG.709.3"; gene_id "chr1:4126993-4140749W"; flanks "4139260^,4139558^"; structure "1-,2-"; splice_chain "4139367-,4139372-"; sources "Undefined,Undefined"; NMorMRNA "null"; degree "4"; dimension "2_2";
chr1	Undefined	as_event	4257829	4258243	.	+	.	transcript_id "MSTRG.729.2,Os01t0180800-01"; gene_id "chr1:4253845-4259581W"; flanks "4257829-,4258243^"; structure "0,1^2-"; splice_chain ",4258023^4258097-"; sources "Undefined,Undefined"; NMorMRNA "null"; degree "4"; dimension "2_2";
chr1	Undefined	as_event	4327336	4328688	.	+	.	transcript_id "Os01t0182500-00,MSTRG.745.3,MSTRG.745.1"; gene_id "chr1:4326675-4328688W"; flanks "4327336^,4328688]"; structure "1-,2-,3-"; splice_chain "4327876-,4327898-,4328021-"; sources "Undefined,Undefined,Undefined"; NMorMRNA "null"; degree "9"; dimension "3_3";
chr1	Undefined	as_event	4380144	4380711	.	+	.	transcript_id "MSTRG.751.3,MSTRG.751.1"; gene_id "chr1:4374232-4393420W"; flanks "4380144^,4380711^"; structure "1-,2-"; splice_chain "4380238-,4380241-"; sources "Undefined,Undefined"; NMorMRNA "null"; degree "4"; dimension "2_2";
chr1	Undefined	as_event	4395762	4396057	.	+	.	transcript_id "MSTRG.752.1/Os01t0183000-01,MSTRG.752.2"; gene_id "chr1:4393750-4397438W"; flanks "4395762^,4396057^"; structure "1-,2-"; splice_chain "4395862-,4395865-"; sources "Undefined,Undefined"; NMorMRNA "null"; degree "4"; dimension "2_2";
chr1	Undefined	as_event	4434129	4435913	.	+	.	transcript_id "Os01t0183800-01,MSTRG.760.2"; gene_id "chr1:4434129-4437827W"; flanks "4434129[,4435913-"; structure "1^,2^"; splice_chain "4434386^,4434390^"; sources "Undefined,Undefined"; NMorMRNA "null"; degree "4"; dimension "2_2";
chr1	Undefined	as_event	4434129	4436047	.	+	.	transcript_id "MSTRG.760.1,Os01t0183800-01,MSTRG.760.2"; gene_id "chr1:4434129-4437827W"; flanks "4434129[,4436047^"; structure "0,1^3-,2^3-"; splice_chain ",4434386^4435913-,4434390^4435913-"; sources "Undefined,Undefined,Undefined"; NMorMRNA "null"; degree "9"; dimension "3_3";
chr1	Undefined	as_event	4444750	4445150	.	+	.	transcript_id "MSTRG.761.2,MSTRG.761.3/Os01t0184000-02"; gene_id "chr1:4444670-4448384W"; flanks "4444750[,4445150^"; structure "0,1^2-"; splice_chain ",4444949^4445053-"; sources "Undefined,Undefined"; NMorMRNA "null"; degree "4"; dimension "2_2";
chr1	Undefined	as_event	4445871	4446051	.	+	.	transcript_id "Os01t0184000-01/Os01t0184000-02,MSTRG.761.3"; gene_id "chr1:4444670-4448384W"; flanks "4445871-,4446051^"; structure "0,1^2-"; splice_chain ",4445904^4445985-"; sources "Undefined,Undefined"; NMorMRNA "null"; degree "4"; dimension "2_2";
chr1	Undefined	as_event	4445780	4446051	.	+	.	transcript_id "Os01t0184000-01/Os01t0184000-02,MSTRG.761.3,MSTRG.761.2/MSTRG.761.5"; gene_id "chr1:4444670-4448384W"; flanks "4445780^,4446051^"; structure "1-,1-2^4-,3-"; splice_chain "4445871-,4445871-4445904^4445985-,4445933-"; sources "Undefined,Undefined,Undefined"; NMorMRNA "null"; degree "9"; dimension "3_3";
chr1	Undefined	as_event	4678454	4678707	.	+	.	transcript_id "MSTRG.797.2,Os01t0187400-01"; gene_id "chr1:4673407-4684765W"; flanks "4678454-,4678707^"; structure "0,1^2-"; splice_chain ",4678509^4678608-"; sources "Undefined,Undefined"; NMorMRNA "null"; degree "4"; dimension "2_2";
chr1	Undefined	as_event	4689881	4690233	.	+	.	transcript_id "Os01t0187500-01,MSTRG.798.1"; gene_id "chr1:4688171-4693114W"; flanks "4689881-,4690233-"; structure "1^,2^"; splice_chain "4690129^,4690134^"; sources "Undefined,Undefined"; NMorMRNA "null"; degree "4"; dimension "2_2";
chr1	Undefined	as_event	4726977	4728584	.	+	.	transcript_id "MSTRG.801.1/Os01t0188100-01,MSTRG.801.3,MSTRG.801.2"; gene_id "chr1:4726734-4731242W"; flanks "4726977^,4728584^"; structure "1-,2-,3-"; splice_chain "4728389-,4728405-,4728473-"; sources "Undefined,Undefined,Undefined"; NMorMRNA "null"; degree "9"; dimension "3_3";
chr1	Undefined	as_event	4729662	4729880	.	+	.	transcript_id "MSTRG.801.1,Os01t0188100-01"; gene_id "chr1:4726734-4731242W"; flanks "4729662-,4729880-"; structure "1^,2^"; splice_chain "4729783^,4729798^"; sources "Undefined,Undefined"; NMorMRNA "null"; degree "4"; dimension "2_2";
chr1	Undefined	as_event	4729662	4729980	.	+	.	transcript_id "MSTRG.801.2/MSTRG.801.3,MSTRG.801.1,Os01t0188100-01"; gene_id "chr1:4726734-4731242W"; flanks "4729662-,4729980^"; structure "0,1^3-,2^3-"; splice_chain ",4729783^4729880-,4729798^4729880-"; sources "Undefined,Undefined,Undefined"; NMorMRNA "null"; degree "9"; dimension "3_3";
chr1	Undefined	as_event	4789906	4790833	.	+	.	transcript_id "MSTRG.810.4/MSTRG.810.5/Os01t0189700-03,MSTRG.810.3"; gene_id "chr1:4789656-4795441W"; flanks "4789906-,4790833-"; structure "1^,2^"; splice_chain "4790009^,4790013^"; sources "Undefined,Undefined"; NMorMRNA "null"; degree "4"; dimension "2_2";
chr1	Undefined	as_event	4789906	4790982	.	+	.	transcript_id "Os01t0189700-02,MSTRG.810.4/Os01t0189700-03,Os01t0189700-01,MSTRG.810.3"; gene_id "chr1:4789656-4795441W"; flanks "4789906-,4790982^"; structure "0,1^5-,2^4-,3^5-"; splice_chain ",4790009^4790833-,4790010^4790830-,4790013^4790833-"; sources "Undefined,Undefined,Undefined,Undefined"; NMorMRNA "null"; degree "16"; dimension "4_4";
chr1	Undefined	as_event	4790833	4791359	.	+	.	transcript_id "MSTRG.810.5,Os01t0189700-03"; gene_id "chr1:4789656-4795441W"; flanks "4790833-,4791359]"; structure "0,1^2-"; splice_chain ",4790982^4791060-"; sources "Undefined,Undefined"; NMorMRNA "null"; degree "4"; dimension "2_2";
chr1	Undefined	as_event	4791837	4792459	.	+	.	transcript_id "MSTRG.810.13/MSTRG.810.8/Os01t0189700-04,MSTRG.810.10/MSTRG.810.11/MSTRG.810.12/MSTRG.810.7/MSTRG.810.9"; gene_id "chr1:4789656-4795441W"; flanks "4791837[,4792459^"; structure "0,1^2-"; splice_chain ",4792236^4792331-"; sources "Undefined,Undefined"; NMorMRNA "null"; degree "4"; dimension "2_2";
chr1	Undefined	as_event	4791060	4792459	.	+	.	transcript_id "Os01t0189700-02,MSTRG.810.3/MSTRG.810.4,Os01t0189700-01"; gene_id "chr1:4789656-4795441W"; flanks "4791060-,4792459^"; structure "0,1^2-3^6-,4^5-"; splice_chain ",4791476^4791650-4791689^4792331-,4792234^4792329-"; sources "Undefined,Undefined,Undefined"; NMorMRNA "null"; degree "9"; dimension "3_3";
chr1	Undefined	as_event	4793134	4794550	.	+	.	transcript_id "MSTRG.810.10/MSTRG.810.13/MSTRG.810.4/Os01t0189700-02,MSTRG.810.3/MSTRG.810.7/Os01t0189700-01"; gene_id "chr1:4789656-4795441W"; flanks "4793134^,4794550-"; structure "0,1-2^"; splice_chain ",4794156-4794254^"; sources "Undefined,Undefined"; NMorMRNA "null"; degree "4"; dimension "2_2";
chr1	Undefined	as_event	4793134	4794569	.	+	.	transcript_id "MSTRG.810.11/MSTRG.810.8,MSTRG.810.12/MSTRG.810.9/Os01t0189700-04"; gene_id "chr1:4789656-4795441W"; flanks "4793134^,4794569-"; structure "0,1-2^"; splice_chain ",4794156-4794254^"; sources "Undefined,Undefined"; NMorMRNA "null"; degree "4"; dimension "2_2";
chr1	Undefined	as_event	4794254	4794686	.	+	.	transcript_id "MSTRG.810.3/MSTRG.810.7/Os01t0189700-01,MSTRG.810.12/MSTRG.810.9/Os01t0189700-04"; gene_id "chr1:4789656-4795441W"; flanks "4794254^,4794686^"; structure "1-,2-"; splice_chain "4794550-,4794569-"; sources "Undefined,Undefined"; NMorMRNA "null"; degree "4"; dimension "2_2";
chr1	Undefined	as_event	4793134	4794686	.	+	.	transcript_id "MSTRG.810.3/MSTRG.810.7/Os01t0189700-01,MSTRG.810.12/MSTRG.810.9/Os01t0189700-04,MSTRG.810.10/MSTRG.810.13/MSTRG.810.4/Os01t0189700-02,MSTRG.810.11/MSTRG.810.8"; gene_id "chr1:4789656-4795441W"; flanks "4793134^,4794686^"; structure "1-2^3-,1-2^4-,3-,4-"; splice_chain "4794156-4794254^4794550-,4794156-4794254^4794569-,4794550-,4794569-"; sources "Undefined,Undefined,Undefined,Undef…
chr1	Undefined	as_event	4794686	4794935	.	+	.	transcript_id "MSTRG.810.10/MSTRG.810.11/Os01t0189700-02,MSTRG.810.13"; gene_id "chr1:4789656-4795441W"; flanks "4794686^,4794935]"; structure "1-,2-"; splice_chain "4794763-,4794769-"; sources "Undefined,Undefined"; NMorMRNA "null"; degree "4"; dimension "2_2";
chr1	Undefined	as_event	4794686	4795439	.	+	.	transcript_id "MSTRG.810.9,MSTRG.810.3"; gene_id "chr1:4789656-4795441W"; flanks "4794686^,4795439]"; structure "1-,2-"; splice_chain "4794763-,4794769-"; sources "Undefined,Undefined"; NMorMRNA "null"; degree "4"; dimension "2_2";
chr1	Undefined	as_event	4905609	4906483	.	+	.	transcript_id "MSTRG.829.1,Os01t0191700-01"; gene_id "chr1:4905609-4909339W"; flanks "4905609[,4906483^"; structure "0,1^2-"; splice_chain ",4905996^4906437-"; sources "Undefined,Undefined"; NMorMRNA "null"; degree "4"; dimension "2_2";
chr1	Undefined	as_event	5030913	5031614	.	+	.	transcript_id "MSTRG.854.1/Os01t0193900-01,MSTRG.854.2"; gene_id "chr1:5028309-5038482W"; flanks "5030913^,5031614^"; structure "1-,2-"; splice_chain "5031443-,5031446-"; sources "Undefined,Undefined"; NMorMRNA "null"; degree "4"; dimension "2_2";
chr1	Undefined	as_event	5100262	5100748	.	+	.	transcript_id "MSTRG.868.1,Os01t0195000-01"; gene_id "chr1:5099555-5102080W"; flanks "5100262-,5100748-"; structure "1^,2^"; splice_chain "5100611^,5100661^"; sources "Undefined,Undefined"; NMorMRNA "null"; degree "4"; dimension "2_2";
chr1	Undefined	as_event	5168374	5168716	.	+	.	transcript_id "MSTRG.881.1,MSTRG.881.2"; gene_id "chr1:5163200-5169520W"; flanks "5168374-,5168716-"; structure "1^,2^"; splice_chain "5168507^,5168556^"; sources "Undefined,Undefined"; NMorMRNA "null"; degree "4"; dimension "2_2";
chr1	Undefined	as_event	5257029	5260073	.	+	.	transcript_id "MSTRG.892.1,MSTRG.892.2"; gene_id "chr1:5256098-5261187W"; flanks "5257029^,5260073^"; structure "1-,2-"; splice_chain "5258405-,5260021-"; sources "Undefined,Undefined"; NMorMRNA "null"; degree "4"; dimension "2_2";
chr1	Undefined	as_event	5409161	5409417	.	+	.	transcript_id "MSTRG.913.3/MSTRG.913.4/MSTRG.913.5/MSTRG.913.7/MSTRG.913.8,MSTRG.913.1/MSTRG.913.2/MSTRG.913.9/Os01t0199900-01"; gene_id "chr1:5405591-5420800W"; flanks "5409161^,5409417^"; structure "1-,2-"; splice_chain "5409256-,5409270-"; sources "Undefined,Undefined"; NMorMRNA "null"; degree "4"; dimension "2_2";
chr1	Undefined	as_event	5410109	5410825	.	+	.	transcript_id "MSTRG.913.1/MSTRG.913.3/MSTRG.913.4/MSTRG.913.9/Os01t0199900-01,MSTRG.913.2/MSTRG.913.5/MSTRG.913.8,MSTRG.913.7"; gene_id "chr1:5405591-5420800W"; flanks "5410109^,5410825^"; structure "1-,2-,3-"; splice_chain "5410722-,5410728-,5410785-"; sources "Undefined,Undefined,Undefined"; NMorMRNA "null"; degree "9"; dimension "3_3";
chr1	Undefined	as_event	5410927	5411534	.	+	.	transcript_id "Os01t0199900-01,MSTRG.913.1/MSTRG.913.2/MSTRG.913.3/MSTRG.913.4/MSTRG.913.5/MSTRG.913.7/MSTRG.913.8/MSTRG.913.9"; gene_id "chr1:5405591-5420800W"; flanks "5410927-,5411534^"; structure "1^3-,2^4-"; splice_chain "5411041^5411437-,5411044^5411440-"; sources "Undefined,Undefined"; NMorMRNA "null"; degree "4"; dimension "2_2";
chr1	Undefined	as_event	5418194	5418572	.	+	.	transcript_id "MSTRG.913.11,MSTRG.913.13"; gene_id "chr1:5405591-5420800W"; flanks "5418194-,5418572^"; structure "0,1^2-"; splice_chain ",5418281^5418493-"; sources "Undefined,Undefined"; NMorMRNA "null"; degree "4"; dimension "2_2";
chr1	Undefined	as_event	5498215	5498649	.	+	.	transcript_id "MSTRG.932.2/Os01t0201000-01,MSTRG.932.1"; gene_id "chr1:5498215-5499834W"; flanks "5498215[,5498649-"; structure "1^,2^"; splice_chain "5498340^,5498369^"; sources "Undefined,Undefined"; NMorMRNA "null"; degree "4"; dimension "2_2";
chr1	Undefined	as_event	5508410	5509494	.	+	.	transcript_id "MSTRG.934.1,Os01t0201100-01"; gene_id "chr1:5506894-5509494W"; flanks "5508410-,5509494]"; structure "0,1^2-"; splice_chain ",5508485^5508580-"; sources "Undefined,Undefined"; NMorMRNA "null"; degree "4"; dimension "2_2";
chr1	Undefined	as_event	5652896	5653130	.	+	.	transcript_id "Os01t0202700-00,MSTRG.956.2"; gene_id "chr1:5642738-5656597W"; flanks "5652896-,5653130-"; structure "1^,2^"; splice_chain "5652945^,5652957^"; sources "Undefined,Undefined"; NMorMRNA "null"; degree "4"; dimension "2_2";
chr1	Undefined	as_event	5762656	5762822	.	+	.	transcript_id "MSTRG.975.3,MSTRG.975.4/Os01t0205100-01"; gene_id "chr1:5760486-5764602W"; flanks "5762656^,5762822^"; structure "1-,2-"; splice_chain "5762756-,5762780-"; sources "Undefined,Undefined"; NMorMRNA "null"; degree "4"; dimension "2_2";
chr1	Undefined	as_event	5762600	5762822	.	+	.	transcript_id "MSTRG.975.1,MSTRG.975.3,MSTRG.975.4/Os01t0205100-01"; gene_id "chr1:5760486-5764602W"; flanks "5762600-,5762822^"; structure "0,1^2-,1^3-"; splice_chain ",5762656^5762756-,5762656^5762780-"; sources "Undefined,Undefined,Undefined"; NMorMRNA "null"; degree "9"; dimension "3_3";
chr1	Undefined	as_event	5762780	5763046	.	+	.	transcript_id "MSTRG.975.5,Os01t0205100-01"; gene_id "chr1:5760486-5764602W"; flanks "5762780-,5763046^"; structure "0,1^2-"; splice_chain ",5762822^5762969-"; sources "Undefined,Undefined"; NMorMRNA "null"; degree "4"; dimension "2_2";
chr1	Undefined	as_event	5762656	5763046	.	+	.	transcript_id "MSTRG.975.3,MSTRG.975.5,Os01t0205100-01"; gene_id "chr1:5760486-5764602W"; flanks "5762656^,5763046^"; structure "1-3^4-,2-,2-3^4-"; splice_chain "5762756-5762822^5762969-,5762780-,5762780-5762822^5762969-"; sources "Undefined,Undefined,Undefined"; NMorMRNA "null"; degree "9"; dimension "3_3";
chr1	Undefined	as_event	5762600	5763046	.	+	.	transcript_id "MSTRG.975.3,MSTRG.975.5,Os01t0205100-01,MSTRG.975.1"; gene_id "chr1:5760486-5764602W"; flanks "5762600-,5763046^"; structure "1^2-4^5-,1^3-,1^3-4^5-,4^5-"; splice_chain "5762656^5762756-5762822^5762969-,5762656^5762780-,5762656^5762780-5762822^5762969-,5762822^5762969-"; sources "Undefined,Undefined,Undefined,Undefined"; NMorMRNA "null"; degree "16"; dimension "4_4";
chr1	Undefined	as_event	5762969	5763633	.	+	.	transcript_id "MSTRG.975.4,MSTRG.975.1/MSTRG.975.3/Os01t0205100-01"; gene_id "chr1:5760486-5764602W"; flanks "5762969-,5763633^"; structure "0,1^2-"; splice_chain ",5763046^5763312-"; sources "Undefined,Undefined"; NMorMRNA "null"; degree "4"; dimension "2_2";
chr1	Undefined	as_event	5762780	5763633	.	+	.	transcript_id "MSTRG.975.4,Os01t0205100-01,MSTRG.975.5"; gene_id "chr1:5760486-5764602W"; flanks "5762780-,5763633^"; structure "1^2-,1^2-3^4-,3^4-"; splice_chain "5762822^5762969-,5762822^5762969-5763046^5763312-,5763046^5763312-"; sources "Undefined,Undefined,Undefined"; NMorMRNA "null"; degree "9"; dimension "3_3";
chr1	Undefined	as_event	5762656	5763633	.	+	.	transcript_id "MSTRG.975.3,MSTRG.975.4,Os01t0205100-01,MSTRG.975.5"; gene_id "chr1:5760486-5764602W"; flanks "5762656^,5763633^"; structure "1-3^4-5^6-,2-3^4-,2-3^4-5^6-,2-5^6-"; splice_chain "5762756-5762822^5762969-5763046^5763312-,5762780-5762822^5762969-,5762780-5762822^5762969-5763046^5763312-,5762780-5763046^5763312-"; sources "Undefined,Undefined,Undefined,Undefined"; NMorMRNA "null"; degr…
chr1	Undefined	as_event	5762600	5763633	.	+	.	transcript_id "MSTRG.975.3,MSTRG.975.4,Os01t0205100-01,MSTRG.975.5,MSTRG.975.1"; gene_id "chr1:5760486-5764602W"; flanks "5762600-,5763633^"; structure "1^2-4^5-6^7-,1^3-4^5-,1^3-4^5-6^7-,1^3-6^7-,4^5-6^7-"; splice_chain "5762656^5762756-5762822^5762969-5763046^5763312-,5762656^5762780-5762822^5762969-,5762656^5762780-5762822^5762969-5763046^5763312-,5762656^5762780-5763046^5763312-,5762822^57629…
chr1	Undefined	as_event	5900703	5901234	.	+	.	transcript_id "MSTRG.1007.4,MSTRG.1007.2/Os01t0208700-01"; gene_id "chr1:5899561-5909560W"; flanks "5900703^,5901234^"; structure "1-,2-3^4-"; splice_chain "5900778-,5900810-5901032^5901131-"; sources "Undefined,Undefined"; NMorMRNA "null"; degree "4"; dimension "2_2";
chr1	Undefined	as_event	5900810	5906914	.	+	.	transcript_id "Os01t0208700-01,MSTRG.1007.3"; gene_id "chr1:5899561-5909560W"; flanks "5900810-,5906914-"; structure "1^2-3^4-5^,6^"; splice_chain "5901032^5901131-5901234^5901531-5901621^,5905450^"; sources "Undefined,Undefined"; NMorMRNA "null"; degree "4"; dimension "2_2";
chr1	Undefined	as_event	5901531	5907068	.	+	.	transcript_id "MSTRG.1007.2/MSTRG.1007.4,Os01t0208700-01"; gene_id "chr1:5899561-5909560W"; flanks "5901531-,5907068^"; structure "0,1^2-"; splice_chain ",5901621^5906914-"; sources "Undefined,Undefined"; NMorMRNA "null"; degree "4"; dimension "2_2";
chr1	Undefined	as_event	5900810	5907068	.	+	.	transcript_id "MSTRG.1007.2,Os01t0208700-01,MSTRG.1007.3"; gene_id "chr1:5899561-5909560W"; flanks "5900810-,5907068^"; structure "1^2-3^4-,1^2-3^4-5^7-,6^7-"; splice_chain "5901032^5901131-5901234^5901531-,5901032^5901131-5901234^5901531-5901621^5906914-,5905450^5906914-"; sources "Undefined,Undefined,Undefined"; NMorMRNA "null"; degree "9"; dimension "3_3";
chr1	Undefined	as_event	5900703	5907068	.	+	.	transcript_id "MSTRG.1007.4,MSTRG.1007.2,Os01t0208700-01,MSTRG.1007.3"; gene_id "chr1:5899561-5909560W"; flanks "5900703^,5907068^"; structure "1-5^6-,2-3^4-5^6-,2-3^4-5^6-7^9-,2-8^9-"; splice_chain "5900778-5901234^5901531-,5900810-5901032^5901131-5901234^5901531-,5900810-5901032^5901131-5901234^5901531-5901621^5906914-,5900810-5905450^5906914-"; sources "Undefined,Undefined,Undefined,Undefined"…
chr1	Undefined	as_event	5932414	5933129	.	+	.	transcript_id "Os01t0209200-01,MSTRG.1012.1"; gene_id "chr1:5921547-5934251W"; flanks "5932414-,5933129^"; structure "1^3-,2^4-"; splice_chain "5932499^5933018-,5932501^5933020-"; sources "Undefined,Undefined"; NMorMRNA "null"; degree "4"; dimension "2_2";
chr1	Undefined	as_event	6114086	6114991	.	+	.	transcript_id "MSTRG.1039.2/MSTRG.1039.3/MSTRG.1039.4/MSTRG.1039.5/MSTRG.1039.7/MSTRG.1039.8/Os01t0212100-01,Os01t0212100-02"; gene_id "chr1:6112811-6132696W"; flanks "6114086^,6114991^"; structure "1-,2-"; splice_chain "6114902-,6114906-"; sources "Undefined,Undefined"; NMorMRNA "null"; degree "4"; dimension "2_2";
chr1	Undefined	as_event	6114991	6115250	.	+	.	transcript_id "MSTRG.1039.2/MSTRG.1039.4/MSTRG.1039.5/MSTRG.1039.8/Os01t0212100-01/Os01t0212100-02,MSTRG.1039.3/MSTRG.1039.7"; gene_id "chr1:6112811-6132696W"; flanks "6114991^,6115250^"; structure "1-,2-"; splice_chain "6115171-,6115199-"; sources "Undefined,Undefined"; NMorMRNA "null"; degree "4"; dimension "2_2";
chr1	Undefined	as_event	6115691	6116500	.	+	.	transcript_id "MSTRG.1039.2/MSTRG.1039.3/Os01t0212100-01/Os01t0212100-02,MSTRG.1039.4/MSTRG.1039.5/MSTRG.1039.7/MSTRG.1039.8"; gene_id "chr1:6112811-6132696W"; flanks "6115691-,6116500-"; structure "1^,2^"; splice_chain "6115776^,6115792^"; sources "Undefined,Undefined"; NMorMRNA "null"; degree "4"; dimension "2_2";
chr1	Undefined	as_event	6118199	6118551	.	+	.	transcript_id "MSTRG.1039.2/MSTRG.1039.3/MSTRG.1039.7/MSTRG.1039.8/Os01t0212100-02,MSTRG.1039.4/MSTRG.1039.5/Os01t0212100-01"; gene_id "chr1:6112811-6132696W"; flanks "6118199-,6118551^"; structure "0,1^2-"; splice_chain ",6118252^6118451-"; sources "Undefined,Undefined"; NMorMRNA "null"; degree "4"; dimension "2_2";
chr1	Undefined	as_event	6122149	6122412	.	+	.	transcript_id "MSTRG.1039.5/MSTRG.1039.8,MSTRG.1039.2/MSTRG.1039.3/MSTRG.1039.4/MSTRG.1039.7/Os01t0212100-01/Os01t0212100-02"; gene_id "chr1:6112811-6132696W"; flanks "6122149-,6122412^"; structure "1^3-,2^4-"; splice_chain "6122237^6122339-,6122238^6122341-"; sources "Undefined,Undefined"; NMorMRNA "null"; degree "4"; dimension "2_2";
chr1	Undefined	as_event	6122898	6123111	.	+	.	transcript_id "MSTRG.1039.2/MSTRG.1039.3/MSTRG.1039.4/MSTRG.1039.5/MSTRG.1039.7/Os01t0212100-01/Os01t0212100-02,MSTRG.1039.8"; gene_id "chr1:6112811-6132696W"; flanks "6122898^,6123111^"; structure "1-,2-"; splice_chain "6123025-,6123028-"; sources "Undefined,Undefined"; NMorMRNA "null"; degree "4"; dimension "2_2";
chr1	Undefined	as_event	6124882	6125509	.	+	.	transcript_id "MSTRG.1039.3/MSTRG.1039.5/MSTRG.1039.8,MSTRG.1039.2/MSTRG.1039.4/MSTRG.1039.7/Os01t0212100-01"; gene_id "chr1:6112811-6132696W"; flanks "6124882-,6125509]"; structure "0,1^2-"; splice_chain ",6125039^6125123-"; sources "Undefined,Undefined"; NMorMRNA "null"; degree "4"; dimension "2_2";
chr1	Undefined	as_event	6248928	6249129	.	+	.	transcript_id "MSTRG.1063.1/Os01t0214300-01,MSTRG.1063.2"; gene_id "chr1:6246570-6253447W"; flanks "6248928^,6249129^"; structure "1-,2-"; splice_chain "6249045-,6249054-"; sources "Undefined,Undefined"; NMorMRNA "null"; degree "4"; dimension "2_2";
chr1	Undefined	as_event	6254252	6254613	.	+	.	transcript_id "MSTRG.1064.1/MSTRG.1064.2/MSTRG.1064.4/Os01t0214400-01,MSTRG.1064.3"; gene_id "chr1:6253793-6257177W"; flanks "6254252^,6254613^"; structure "1-,2-"; splice_chain "6254372-,6254381-"; sources "Undefined,Undefined"; NMorMRNA "null"; degree "4"; dimension "2_2";
chr1	Undefined	as_event	6254849	6255167	.	+	.	transcript_id "MSTRG.1064.2/MSTRG.1064.4,MSTRG.1064.1/MSTRG.1064.3"; gene_id "chr1:6253793-6257177W"; flanks "6254849^,6255167^"; structure "1-,2-"; splice_chain "6254973-,6254984-"; sources "Undefined,Undefined"; NMorMRNA "null"; degree "4"; dimension "2_2";
chr1	Undefined	as_event	6254753	6255167	.	+	.	transcript_id "Os01t0214400-01,MSTRG.1064.2/MSTRG.1064.4,MSTRG.1064.1/MSTRG.1064.3"; gene_id "chr1:6253793-6257177W"; flanks "6254753-,6255167^"; structure "0,1^2-,1^3-"; splice_chain ",6254849^6254973-,6254849^6254984-"; sources "Undefined,Undefined,Undefined"; NMorMRNA "null"; degree "9"; dimension "3_3";
chr1	Undefined	as_event	6255167	6255322	.	+	.	transcript_id "MSTRG.1064.1/MSTRG.1064.2/MSTRG.1064.3/Os01t0214400-01,MSTRG.1064.4"; gene_id "chr1:6253793-6257177W"; flanks "6255167^,6255322^"; structure "1-,2-"; splice_chain "6255241-,6255252-"; sources "Undefined,Undefined"; NMorMRNA "null"; degree "4"; dimension "2_2";
chr1	Undefined	as_event	6268198	6268442	.	+	.	transcript_id "Os01t0214600-01,MSTRG.1066.2"; gene_id "chr1:6267440-6270800W"; flanks "6268198-,6268442-"; structure "1^,2^"; splice_chain "6268295^,6268346^"; sources "Undefined,Undefined"; NMorMRNA "null"; degree "4"; dimension "2_2";
chr1	Undefined	as_event	6279329	6279843	.	+	.	transcript_id "Os01t0214800-03,Os01t0214800-01,MSTRG.1069.1"; gene_id "chr1:6278330-6283660W"; flanks "6279329-,6279843^"; structure "1^6-,2^4-,3^5-"; splice_chain "6279363^6279591-,6279475^6279568-,6279477^6279570-"; sources "Undefined,Undefined,Undefined"; NMorMRNA "null"; degree "9"; dimension "3_3";
chr1	Undefined	as_event	6418959	6419418	.	+	.	transcript_id "Os01t0217500-01,MSTRG.1085.1"; gene_id "chr1:6412745-6419926W"; flanks "6418959-,6419418^"; structure "1^3-,2^4-"; splice_chain "6419173^6419277-,6419174^6419278-"; sources "Undefined,Undefined"; NMorMRNA "null"; degree "4"; dimension "2_2";
chr1	Undefined	as_event	6434385	6434849	.	+	.	transcript_id "MSTRG.1086.3,Os01t0217800-01"; gene_id "chr1:6432336-6436094W"; flanks "6434385^,6434849^"; structure "1-,2-"; splice_chain "6434477-,6434646-"; sources "Undefined,Undefined"; NMorMRNA "null"; degree "4"; dimension "2_2";
chr1	Undefined	as_event	6434305	6434849	.	+	.	transcript_id "MSTRG.1086.1/MSTRG.1086.4,MSTRG.1086.3,Os01t0217800-01"; gene_id "chr1:6432336-6436094W"; flanks "6434305-,6434849^"; structure "0,1^2-,1^3-"; splice_chain ",6434385^6434477-,6434385^6434646-"; sources "Undefined,Undefined,Undefined"; NMorMRNA "null"; degree "9"; dimension "3_3";
chr1	Undefined	as_event	6450221	6450456	.	+	.	transcript_id "MSTRG.1088.2,MSTRG.1088.1/MSTRG.1088.4/Os01t0218032-01"; gene_id "chr1:6444246-6456068W"; flanks "6450221-,6450456^"; structure "0,1^2-"; splice_chain ",6450312^6450388-"; sources "Undefined,Undefined"; NMorMRNA "null"; degree "4"; dimension "2_2";
chr1	Undefined	as_event	6450662	6451873	.	+	.	transcript_id "MSTRG.1088.2/MSTRG.1088.4,Os01t0218032-01"; gene_id "chr1:6444246-6456068W"; flanks "6450662-,6451873^"; structure "0,1^2-"; splice_chain ",6450744^6451427-"; sources "Undefined,Undefined"; NMorMRNA "null"; degree "4"; dimension "2_2";
chr1	Undefined	as_event	6450544	6451873	.	+	.	transcript_id "MSTRG.1088.1,MSTRG.1088.2/MSTRG.1088.4,Os01t0218032-01"; gene_id "chr1:6444246-6456068W"; flanks "6450544-,6451873^"; structure "0,1^2-,1^2-3^4-"; splice_chain ",6450580^6450662-,6450580^6450662-6450744^6451427-"; sources "Undefined,Undefined,Undefined"; NMorMRNA "null"; degree "9"; dimension "3_3";
chr1	Undefined	as_event	6452794	6454299	.	+	.	transcript_id "MSTRG.1088.2,MSTRG.1088.1/MSTRG.1088.4/Os01t0218032-01"; gene_id "chr1:6444246-6456068W"; flanks "6452794-,6454299^"; structure "0,1^2-"; splice_chain ",6452908^6454261-"; sources "Undefined,Undefined"; NMorMRNA "null"; degree "4"; dimension "2_2";
chr1	Undefined	as_event	6526601	6526912	.	+	.	transcript_id "Os01t0219100-01,MSTRG.1099.2"; gene_id "chr1:6525486-6528178W"; flanks "6526601^,6526912^"; structure "1-,2-"; splice_chain "6526795-,6526800-"; sources "Undefined,Undefined"; NMorMRNA "null"; degree "4"; dimension "2_2";
chr1	Undefined	as_event	6653148	6655290	.	+	.	transcript_id "Os01t0221500-01,MSTRG.1122.1"; gene_id "chr1:6653148-6655290W"; flanks "6653148[,6655290]"; structure "0,1^2-"; splice_chain ",6653576^6654666-"; sources "Undefined,Undefined"; NMorMRNA "null"; degree "4"; dimension "2_2";
chr1	Undefined	as_event	6663727	6664118	.	+	.	transcript_id "MSTRG.1125.3,MSTRG.1125.1/MSTRG.1125.2/Os01t0221700-00"; gene_id "chr1:6663533-6667623W"; flanks "6663727-,6664118-"; structure "1^,2^"; splice_chain "6663985^,6663996^"; sources "Undefined,Undefined"; NMorMRNA "null"; degree "4"; dimension "2_2";
chr1	Undefined	as_event	6664171	6664784	.	+	.	transcript_id "MSTRG.1125.2/MSTRG.1125.3,MSTRG.1125.1/Os01t0221700-00"; gene_id "chr1:6663533-6667623W"; flanks "6664171^,6664784^"; structure "1-,2-"; splice_chain "6664705-,6664723-"; sources "Undefined,Undefined"; NMorMRNA "null"; degree "4"; dimension "2_2";
chr1	Undefined	as_event	6837447	6837775	.	+	.	transcript_id "MSTRG.1155.1/MSTRG.1155.4,MSTRG.1155.2"; gene_id "chr1:6836923-6841237W"; flanks "6837447^,6837775^"; structure "1-,2-"; splice_chain "6837650-,6837667-"; sources "Undefined,Undefined"; NMorMRNA "null"; degree "4"; dimension "2_2";
chr1	Undefined	as_event	6837406	6837775	.	+	.	transcript_id "MSTRG.1155.3,MSTRG.1155.1,MSTRG.1155.2"; gene_id "chr1:6836923-6841237W"; flanks "6837406-,6837775^"; structure "0,1^2-,1^3-"; splice_chain ",6837447^6837650-,6837447^6837667-"; sources "Undefined,Undefined,Undefined"; NMorMRNA "null"; degree "9"; dimension "3_3";
chr1	Undefined	as_event	6838899	6839619	.	+	.	transcript_id "MSTRG.1155.3/MSTRG.1155.4/Os01t0224400-01,MSTRG.1155.1/MSTRG.1155.2"; gene_id "chr1:6836923-6841237W"; flanks "6838899^,6839619-"; structure "0,1-2^"; splice_chain ",6839308-6839407^"; sources "Undefined,Undefined"; NMorMRNA "null"; degree "4"; dimension "2_2";
chr1	Undefined	as_event	6839825	6840239	.	+	.	transcript_id "Os01t0224400-01,MSTRG.1155.1/MSTRG.1155.2/MSTRG.1155.3/MSTRG.1155.4"; gene_id "chr1:6836923-6841237W"; flanks "6839825-,6840239^"; structure "1^3-,2^4-"; splice_chain "6839972^6840179-,6839974^6840181-"; sources "Undefined,Undefined"; NMorMRNA "null"; degree "4"; dimension "2_2";
chr1	Undefined	as_event	6889444	6891523	.	+	.	transcript_id "Os01t0225100-01,MSTRG.1162.2"; gene_id "chr1:6889015-6896387W"; flanks "6889444[,6891523^"; structure "0,1^2-"; splice_chain ",6890227^6891498-"; sources "Undefined,Undefined"; NMorMRNA "null"; degree "4"; dimension "2_2";
chr1	Undefined	as_event	6890227	6892679	.	+	.	transcript_id "MSTRG.1162.1,MSTRG.1162.2"; gene_id "chr1:6889015-6896387W"; flanks "6890227^,6892679-"; structure "0,1-2^"; splice_chain ",6891498-6891523^"; sources "Undefined,Undefined"; NMorMRNA "null"; degree "4"; dimension "2_2";
chr1	Undefined	as_event	6895103	6896387	.	+	.	transcript_id "MSTRG.1162.1,MSTRG.1162.2/Os01t0225100-01"; gene_id "chr1:6889015-6896387W"; flanks "6895103-,6896387]"; structure "0,1^2-3^4-5^6-"; splice_chain ",6895170^6895238-6895344^6895475-6895542^6895885-"; sources "Undefined,Undefined"; NMorMRNA "null"; degree "4"; dimension "2_2";
chr1	Undefined	as_event	6898774	6899133	.	+	.	transcript_id "Os01t0225200-01,MSTRG.1163.1"; gene_id "chr1:6897503-6904263W"; flanks "6898774^,6899133^"; structure "1-,2-"; splice_chain "6898860-,6898877-"; sources "Undefined,Undefined"; NMorMRNA "null"; degree "4"; dimension "2_2";
chr1	Undefined	as_event	6898774	6899492	.	+	.	transcript_id "MSTRG.1163.3,MSTRG.1163.2"; gene_id "chr1:6897503-6904263W"; flanks "6898774^,6899492^"; structure "1-,2-"; splice_chain "6898860-,6898877-"; sources "Undefined,Undefined"; NMorMRNA "null"; degree "4"; dimension "2_2";
chr1	Undefined	as_event	6898877	6899596	.	+	.	transcript_id "MSTRG.1163.1,MSTRG.1163.2"; gene_id "chr1:6897503-6904263W"; flanks "6898877-,6899596-"; structure "1^,2^"; splice_chain "6899133^,6899492^"; sources "Undefined,Undefined"; NMorMRNA "null"; degree "4"; dimension "2_2";
chr1	Undefined	as_event	6898860	6899596	.	+	.	transcript_id "Os01t0225200-01,MSTRG.1163.3"; gene_id "chr1:6897503-6904263W"; flanks "6898860-,6899596-"; structure "1^,2^"; splice_chain "6899133^,6899492^"; sources "Undefined,Undefined"; NMorMRNA "null"; degree "4"; dimension "2_2";
chr1	Undefined	as_event	6898774	6899596	.	+	.	transcript_id "Os01t0225200-01,MSTRG.1163.3,MSTRG.1163.1,MSTRG.1163.2"; gene_id "chr1:6897503-6904263W"; flanks "6898774^,6899596-"; structure "1-3^,1-4^,2-3^,2-4^"; splice_chain "6898860-6899133^,6898860-6899492^,6898877-6899133^,6898877-6899492^"; sources "Undefined,Undefined,Undefined,Undefined"; NMorMRNA "null"; degree "16"; dimension "4_4";
chr1	Undefined	as_event	6900122	6901374	.	+	.	transcript_id "Os01t0225200-01,MSTRG.1163.1/MSTRG.1163.2/MSTRG.1163.3/MSTRG.1163.5"; gene_id "chr1:6897503-6904263W"; flanks "6900122-,6901374^"; structure "0,1^2-"; splice_chain ",6900247^6901195-"; sources "Undefined,Undefined"; NMorMRNA "null"; degree "4"; dimension "2_2";
chr1	Undefined	as_event	6906022	6906885	.	+	.	transcript_id "MSTRG.1164.3,MSTRG.1164.1/MSTRG.1164.2"; gene_id "chr1:6904423-6909594W"; flanks "6906022^,6906885-"; structure "0,1-2^"; splice_chain ",6906601-6906680^"; sources "Undefined,Undefined"; NMorMRNA "null"; degree "4"; dimension "2_2";
chr1	Undefined	as_event	6907979	6908717	.	+	.	transcript_id "MSTRG.1164.1/MSTRG.1164.3/MSTRG.1164.4/Os01t0225300-01,MSTRG.1164.2"; gene_id "chr1:6904423-6909594W"; flanks "6907979^,6908717^"; structure "1-,2-"; splice_chain "6908469-,6908490-"; sources "Undefined,Undefined"; NMorMRNA "null"; degree "4"; dimension "2_2";
chr1	Undefined	as_event	6979765	6980053	.	+	.	transcript_id "MSTRG.1176.3,MSTRG.1176.7/Os01t0226500-01,MSTRG.1176.1/MSTRG.1176.4/MSTRG.1176.6"; gene_id "chr1:6979573-6985778W"; flanks "6979765^,6980053^"; structure "1-,2-,3-"; splice_chain "6979840-,6979855-,6979860-"; sources "Undefined,Undefined,Undefined"; NMorMRNA "null"; degree "9"; dimension "3_3";
chr1	Undefined	as_event	6979665	6980053	.	+	.	transcript_id "MSTRG.1176.8,MSTRG.1176.7"; gene_id "chr1:6979573-6985778W"; flanks "6979665[,6980053^"; structure "1^3-,2^4-"; splice_chain "6979731^6979821-,6979765^6979855-"; sources "Undefined,Undefined"; NMorMRNA "null"; degree "4"; dimension "2_2";
chr1	Undefined	as_event	6979573	6980053	.	+	.	transcript_id "MSTRG.1176.2,MSTRG.1176.1"; gene_id "chr1:6979573-6985778W"; flanks "6979573[,6980053^"; structure "0,1^2-"; splice_chain ",6979765^6979860-"; sources "Undefined,Undefined"; NMorMRNA "null"; degree "4"; dimension "2_2";
chr1	Undefined	as_event	6980838	6981473	.	+	.	transcript_id "Os01t0226500-02,Os01t0226500-01"; gene_id "chr1:6979573-6985778W"; flanks "6980838-,6981473^"; structure "0,1^2-"; splice_chain ",6980903^6981403-"; sources "Undefined,Undefined"; NMorMRNA "null"; degree "4"; dimension "2_2";
chr1	Undefined	as_event	6981403	6982718	.	+	.	transcript_id "Os01t0226500-01,MSTRG.1176.1/MSTRG.1176.2/MSTRG.1176.3/MSTRG.1176.4/MSTRG.1176.6/MSTRG.1176.7/MSTRG.1176.8"; gene_id "chr1:6979573-6985778W"; flanks "6981403-,6982718^"; structure "1^3-,2^4-"; splice_chain "6981473^6982331-,6981475^6982333-"; sources "Undefined,Undefined"; NMorMRNA "null"; degree "4"; dimension "2_2";
chr1	Undefined	as_event	6980838	6982718	.	+	.	transcript_id "Os01t0226500-01,MSTRG.1176.1/MSTRG.1176.2/MSTRG.1176.3/MSTRG.1176.4/MSTRG.1176.6/MSTRG.1176.7/MSTRG.1176.8,Os01t0226500-02"; gene_id "chr1:6979573-6985778W"; flanks "6980838-,6982718^"; structure "1^2-3^5-,1^2-4^6-,3^5-"; splice_chain "6980903^6981403-6981473^6982331-,6980903^6981403-6981475^6982333-,6981473^6982331-"; sources "Undefined,Undefined,Undefined"; NMorMRNA "null"; degre…
chr1	Undefined	as_event	6983661	6985395	.	+	.	transcript_id "MSTRG.1176.4/MSTRG.1176.7,MSTRG.1176.6"; gene_id "chr1:6979573-6985778W"; flanks "6983661-,6985395-"; structure "1^,2^"; splice_chain "6983816^,6984453^"; sources "Undefined,Undefined"; NMorMRNA "null"; degree "4"; dimension "2_2";
chr1	Undefined	as_event	6983816	6985756	.	+	.	transcript_id "MSTRG.1176.4/MSTRG.1176.7,MSTRG.1176.3"; gene_id "chr1:6979573-6985778W"; flanks "6983816^,6985756]"; structure "1-,2-"; splice_chain "6985395-,6985398-"; sources "Undefined,Undefined"; NMorMRNA "null"; degree "4"; dimension "2_2";
chr1	Undefined	as_event	6983661	6985756	.	+	.	transcript_id "MSTRG.1176.2,MSTRG.1176.4/MSTRG.1176.7,MSTRG.1176.3"; gene_id "chr1:6979573-6985778W"; flanks "6983661-,6985756]"; structure "0,1^2-,1^3-"; splice_chain ",6983816^6985395-,6983816^6985398-"; sources "Undefined,Undefined,Undefined"; NMorMRNA "null"; degree "9"; dimension "3_3";
chr1	Undefined	as_event	6983661	6985778	.	+	.	transcript_id "MSTRG.1176.1,MSTRG.1176.6"; gene_id "chr1:6979573-6985778W"; flanks "6983661-,6985778]"; structure "1^4-,2^3-"; splice_chain "6983816^6985398-,6984453^6985395-"; sources "Undefined,Undefined"; NMorMRNA "null"; degree "4"; dimension "2_2";
chr1	Undefined	as_event	6991138	6992970	.	+	.	transcript_id "Os01t0226600-01,Os01t0226600-02"; gene_id "chr1:6987901-6994006W"; flanks "6991138-,6992970-"; structure "1^2-4^,3^"; splice_chain "6991968^6992092-6992871^,6992862^"; sources "Undefined,Undefined"; NMorMRNA "null"; degree "4"; dimension "2_2";
chr1	Undefined	as_event	7026398	7026708	.	+	.	transcript_id "MSTRG.1180.2,Os01t0227100-01/Os01t0227100-02"; gene_id "chr1:7024297-7030591W"; flanks "7026398^,7026708^"; structure "1-,2-"; splice_chain "7026509-,7026513-"; sources "Undefined,Undefined"; NMorMRNA "null"; degree "4"; dimension "2_2";
chr1	Undefined	as_event	7038795	7039962	.	+	.	transcript_id "MSTRG.1181.3,Os01t0227200-01"; gene_id "chr1:7038103-7042925W"; flanks "7038795^,7039962^"; structure "1-,2-"; splice_chain "7039425-,7039447-"; sources "Undefined,Undefined"; NMorMRNA "null"; degree "4"; dimension "2_2";
chr1	Undefined	as_event	7038103	7039962	.	+	.	transcript_id "MSTRG.1181.1,Os01t0227200-01"; gene_id "chr1:7038103-7042925W"; flanks "7038103[,7039962^"; structure "0,1^2-"; splice_chain ",7038795^7039447-"; sources "Undefined,Undefined"; NMorMRNA "null"; degree "4"; dimension "2_2";
chr1	Undefined	as_event	7044309	7044560	.	+	.	transcript_id "MSTRG.1183.1,Os01t0227300-01"; gene_id "chr1:7044012-7047544W"; flanks "7044309-,7044560^"; structure "0,1^2-"; splice_chain ",7044335^7044461-"; sources "Undefined,Undefined"; NMorMRNA "null"; degree "4"; dimension "2_2";
chr1	Undefined	as_event	7054110	7056373	.	+	.	transcript_id "MSTRG.1186.1,Os01t0227500-01"; gene_id "chr1:7051985-7056373W"; flanks "7054110^,7056373]"; structure "1-,2-"; splice_chain "7055409-,7055497-"; sources "Undefined,Undefined"; NMorMRNA "null"; degree "4"; dimension "2_2";
chr1	Undefined	as_event	7053100	7056373	.	+	.	transcript_id "MSTRG.1186.2,Os01t0227500-01"; gene_id "chr1:7051985-7056373W"; flanks "7053100[,7056373]"; structure "0,1^2-"; splice_chain ",7054110^7055497-"; sources "Undefined,Undefined"; NMorMRNA "null"; degree "4"; dimension "2_2";
chr1	Undefined	as_event	7092288	7092801	.	+	.	transcript_id "MSTRG.1194.2,MSTRG.1194.1"; gene_id "chr1:7092034-7095315W"; flanks "7092288^,7092801^"; structure "1-,2-"; splice_chain "7092679-,7092687-"; sources "Undefined,Undefined"; NMorMRNA "null"; degree "4"; dimension "2_2";
chr1	Undefined	as_event	7092288	7092938	.	+	.	transcript_id "Os01t0228400-01,MSTRG.1194.2,MSTRG.1194.1"; gene_id "chr1:7092034-7095315W"; flanks "7092288^,7092938-"; structure "0,1-3^,2-3^"; splice_chain ",7092679-7092801^,7092687-7092801^"; sources "Undefined,Undefined,Undefined"; NMorMRNA "null"; degree "9"; dimension "3_3";
chr1	Undefined	as_event	7135684	7136162	.	+	.	transcript_id "Os01t0229200-01/Os01t0229200-02/Os01t0229200-03,MSTRG.1205.3"; gene_id "chr1:7129236-7137327W"; flanks "7135684-,7136162^"; structure "0,1^2-"; splice_chain ",7135840^7135988-"; sources "Undefined,Undefined"; NMorMRNA "null"; degree "4"; dimension "2_2";
chr1	Undefined	as_event	7174028	7175425	.	+	.	transcript_id "MSTRG.1212.1/MSTRG.1212.2/Os01t0229500-01,MSTRG.1212.4"; gene_id "chr1:7173618-7177355W"; flanks "7174028-,7175425-"; structure "1^,2^"; splice_chain "7174168^,7174172^"; sources "Undefined,Undefined"; NMorMRNA "null"; degree "4"; dimension "2_2";
chr1	Undefined	as_event	7175425	7177355	.	+	.	transcript_id "MSTRG.1212.1,MSTRG.1212.2"; gene_id "chr1:7173618-7177355W"; flanks "7175425-,7177355]"; structure "1^2-,3^4-"; splice_chain "7176319^7176448-,7176588^7176696-"; sources "Undefined,Undefined"; NMorMRNA "null"; degree "4"; dimension "2_2";
chr1	Undefined	as_event	7197389	7199064	.	+	.	transcript_id "MSTRG.1217.2/Os01t0229900-01,MSTRG.1217.3/MSTRG.1217.5/Os01t0229900-02"; gene_id "chr1:7197022-7214364W"; flanks "7197389^,7199064-"; structure "0,1-2^"; splice_chain ",7198331-7198362^"; sources "Undefined,Undefined"; NMorMRNA "null"; degree "4"; dimension "2_2";
chr1	Undefined	as_event	7200850	7203555	.	+	.	transcript_id "MSTRG.1217.6/MSTRG.1217.8,MSTRG.1217.2/MSTRG.1217.3/MSTRG.1217.5/MSTRG.1217.7/Os01t0229900-01/Os01t0229900-02"; gene_id "chr1:7197022-7214364W"; flanks "7200850^,7203555-"; structure "0,1-2^"; splice_chain ",7201505-7201643^"; sources "Undefined,Undefined"; NMorMRNA "null"; degree "4"; dimension "2_2";
chr1	Undefined	as_event	7203758	7204432	.	+	.	transcript_id "MSTRG.1217.3/MSTRG.1217.5/MSTRG.1217.6/Os01t0229900-02,MSTRG.1217.2/MSTRG.1217.7/MSTRG.1217.8"; gene_id "chr1:7197022-7214364W"; flanks "7203758-,7204432-"; structure "1^,2^"; splice_chain "7204105^,7204343^"; sources "Undefined,Undefined"; NMorMRNA "null"; degree "4"; dimension "2_2";
chr1	Undefined	as_event	7204573	7205680	.	+	.	transcript_id "MSTRG.1217.5,MSTRG.1217.2"; gene_id "chr1:7197022-7214364W"; flanks "7204573^,7205680]"; structure "1-,2-"; splice_chain "7205135-,7205179-"; sources "Undefined,Undefined"; NMorMRNA "null"; degree "4"; dimension "2_2";
chr1	Undefined	as_event	7203758	7205680	.	+	.	transcript_id "Os01t0229900-01,MSTRG.1217.5,MSTRG.1217.2"; gene_id "chr1:7197022-7214364W"; flanks "7203758-,7205680]"; structure "0,1^3-4^5-,2^3-4^6-"; splice_chain ",7204105^7204432-7204573^7205135-,7204343^7204432-7204573^7205179-"; sources "Undefined,Undefined,Undefined"; NMorMRNA "null"; degree "9"; dimension "3_3";
chr1	Undefined	as_event	7204573	7205752	.	+	.	transcript_id "MSTRG.1217.7,MSTRG.1217.8"; gene_id "chr1:7197022-7214364W"; flanks "7204573^,7205752]"; structure "1-,2-"; splice_chain "7205135-,7205179-"; sources "Undefined,Undefined"; NMorMRNA "null"; degree "4"; dimension "2_2";
chr1	Undefined	as_event	7266500	7267238	.	+	.	transcript_id "Os01t0231500-02,MSTRG.1229.1/MSTRG.1229.10/MSTRG.1229.11/MSTRG.1229.12/MSTRG.1229.13/MSTRG.1229.14/MSTRG.1229.16/MSTRG.1229.3/MSTRG.1229.4/MSTRG.1229.5/MSTRG.1229.6/MSTRG.1229.7/MSTRG.1229.8/MSTRG.1229.9/Os01t0231500-01"; gene_id "chr1:7265286-7273208W"; flanks "7266500-,7267238^"; structure "0,1^2-"; splice_chain ",7266648^7267143-"; sources "Undefined,Undefined"; NMorMRNA "null";…
chr1	Undefined	as_event	7269016	7269796	.	+	.	transcript_id "Os01t0231500-02,MSTRG.1229.1/MSTRG.1229.10/MSTRG.1229.11/MSTRG.1229.12/MSTRG.1229.13/MSTRG.1229.14/MSTRG.1229.16/MSTRG.1229.3/MSTRG.1229.4/MSTRG.1229.5/MSTRG.1229.6/MSTRG.1229.7/MSTRG.1229.8/MSTRG.1229.9/Os01t0231500-01"; gene_id "chr1:7265286-7273208W"; flanks "7269016-,7269796^"; structure "0,1^2-"; splice_chain ",7269080^7269739-"; sources "Undefined,Undefined"; NMorMRNA "null";…
chr1	Undefined	as_event	7271079	7271373	.	+	.	transcript_id "MSTRG.1229.9,MSTRG.1229.1/MSTRG.1229.13/MSTRG.1229.16/MSTRG.1229.3/MSTRG.1229.6"; gene_id "chr1:7265286-7273208W"; flanks "7271079^,7271373^"; structure "1-,2-"; splice_chain "7271296-,7271302-"; sources "Undefined,Undefined"; NMorMRNA "null"; degree "4"; dimension "2_2";
chr1	Undefined	as_event	7270910	7271373	.	+	.	transcript_id "MSTRG.1229.4,MSTRG.1229.9,MSTRG.1229.1/MSTRG.1229.13/MSTRG.1229.16/MSTRG.1229.3/MSTRG.1229.6"; gene_id "chr1:7265286-7273208W"; flanks "7270910-,7271373^"; structure "0,1^2-,1^3-"; splice_chain ",7271079^7271296-,7271079^7271302-"; sources "Undefined,Undefined,Undefined"; NMorMRNA "null"; degree "9"; dimension "3_3";
chr1	Undefined	as_event	7271079	7271377	.	+	.	transcript_id "MSTRG.1229.5,MSTRG.1229.10/MSTRG.1229.12/MSTRG.1229.14"; gene_id "chr1:7265286-7273208W"; flanks "7271079^,7271377^"; structure "1-,2-"; splice_chain "7271296-,7271302-"; sources "Undefined,Undefined"; NMorMRNA "null"; degree "4"; dimension "2_2";
chr1	Undefined	as_event	7270910	7271377	.	+	.	transcript_id "MSTRG.1229.7,MSTRG.1229.5,MSTRG.1229.10/MSTRG.1229.12/MSTRG.1229.14"; gene_id "chr1:7265286-7273208W"; flanks "7270910-,7271377^"; structure "0,1^2-,1^3-"; splice_chain ",7271079^7271296-,7271079^7271302-"; sources "Undefined,Undefined,Undefined"; NMorMRNA "null"; degree "9"; dimension "3_3";
chr1	Undefined	as_event	7271302	7271468	.	+	.	transcript_id "MSTRG.1229.1/MSTRG.1229.16/MSTRG.1229.3/MSTRG.1229.6,MSTRG.1229.10/MSTRG.1229.12/MSTRG.1229.14"; gene_id "chr1:7265286-7273208W"; flanks "7271302-,7271468-"; structure "1^,2^"; splice_chain "7271373^,7271377^"; sources "Undefined,Undefined"; NMorMRNA "null"; degree "4"; dimension "2_2";
chr1	Undefined	as_event	7271296	7271468	.	+	.	transcript_id "MSTRG.1229.9,MSTRG.1229.5"; gene_id "chr1:7265286-7273208W"; flanks "7271296-,7271468-"; structure "1^,2^"; splice_chain "7271373^,7271377^"; sources "Undefined,Undefined"; NMorMRNA "null"; degree "4"; dimension "2_2";
chr1	Undefined	as_event	7271079	7271468	.	+	.	transcript_id "MSTRG.1229.9,MSTRG.1229.5,MSTRG.1229.1/MSTRG.1229.16/MSTRG.1229.3/MSTRG.1229.6,MSTRG.1229.10/MSTRG.1229.12/MSTRG.1229.14"; gene_id "chr1:7265286-7273208W"; flanks "7271079^,7271468-"; structure "1-3^,1-4^,2-3^,2-4^"; splice_chain "7271296-7271373^,7271296-7271377^,7271302-7271373^,7271302-7271377^"; sources "Undefined,Undefined,Undefined,Undefined"; NMorMRNA "null"; degree "16"; di…
chr1	Undefined	as_event	7270910	7271468	.	+	.	transcript_id "MSTRG.1229.9,MSTRG.1229.5,MSTRG.1229.1/MSTRG.1229.16/MSTRG.1229.3/MSTRG.1229.6,MSTRG.1229.10/MSTRG.1229.12/MSTRG.1229.14,MSTRG.1229.4,MSTRG.1229.7"; gene_id "chr1:7265286-7273208W"; flanks "7270910-,7271468-"; structure "1^2-4^,1^2-5^,1^3-4^,1^3-5^,4^,5^"; splice_chain "7271079^7271296-7271373^,7271079^7271296-7271377^,7271079^7271302-7271373^,7271079^7271302-7271377^,7271373^,7271…
chr1	Undefined	as_event	7271296	7271620	.	+	.	transcript_id "MSTRG.1229.8,MSTRG.1229.5"; gene_id "chr1:7265286-7273208W"; flanks "7271296-,7271620^"; structure "0,1^2-"; splice_chain ",7271377^7271468-"; sources "Undefined,Undefined"; NMorMRNA "null"; degree "4"; dimension "2_2";
chr1	Undefined	as_event	7271079	7271620	.	+	.	transcript_id "MSTRG.1229.8,MSTRG.1229.5,MSTRG.1229.16/MSTRG.1229.6,MSTRG.1229.10/MSTRG.1229.12"; gene_id "chr1:7265286-7273208W"; flanks "7271079^,7271620^"; structure "1-,1-4^5-,2-3^5-,2-4^5-"; splice_chain "7271296-,7271296-7271377^7271468-,7271302-7271373^7271468-,7271302-7271377^7271468-"; sources "Undefined,Undefined,Undefined,Undefined"; NMorMRNA "null"; degree "16"; dimension "4_4";
chr1	Undefined	as_event	7270910	7271620	.	+	.	transcript_id "Os01t0231500-02,MSTRG.1229.8,MSTRG.1229.5,MSTRG.1229.16/MSTRG.1229.6,MSTRG.1229.10/MSTRG.1229.12,MSTRG.1229.4,MSTRG.1229.7"; gene_id "chr1:7265286-7273208W"; flanks "7270910-,7271620^"; structure "0,1^2-,1^2-5^6-,1^3-4^6-,1^3-5^6-,4^6-,5^6-"; splice_chain ",7271079^7271296-,7271079^7271296-7271377^7271468-,7271079^7271302-7271373^7271468-,7271079^7271302-7271377^7271468-,7271373^72…
chr1	Undefined	as_event	7271373	7271652	.	+	.	transcript_id "MSTRG.1229.13,MSTRG.1229.1/MSTRG.1229.3/MSTRG.1229.9"; gene_id "chr1:7265286-7273208W"; flanks "7271373^,7271652^"; structure "1-,2-"; splice_chain "7271448-,7271468-"; sources "Undefined,Undefined"; NMorMRNA "null"; degree "4"; dimension "2_2";
chr1	Undefined	as_event	7271302	7271652	.	+	.	transcript_id "MSTRG.1229.13,MSTRG.1229.1/MSTRG.1229.3,MSTRG.1229.14"; gene_id "chr1:7265286-7273208W"; flanks "7271302-,7271652^"; structure "1^3-,1^4-,2^4-"; splice_chain "7271373^7271448-,7271373^7271468-,7271377^7271468-"; sources "Undefined,Undefined,Undefined"; NMorMRNA "null"; degree "9"; dimension "3_3";
chr1	Undefined	as_event	7271296	7271652	.	+	.	transcript_id "MSTRG.1229.11,MSTRG.1229.9"; gene_id "chr1:7265286-7273208W"; flanks "7271296-,7271652^"; structure "0,1^2-"; splice_chain ",7271373^7271468-"; sources "Undefined,Undefined"; NMorMRNA "null"; degree "4"; dimension "2_2";
chr1	Undefined	as_event	7271079	7271652	.	+	.	transcript_id "MSTRG.1229.11,MSTRG.1229.9,MSTRG.1229.13,MSTRG.1229.1/MSTRG.1229.3,MSTRG.1229.14"; gene_id "chr1:7265286-7273208W"; flanks "7271079^,7271652^"; structure "1-,1-3^6-,2-3^5-,2-3^6-,2-4^6-"; splice_chain "7271296-,7271296-7271373^7271468-,7271302-7271373^7271448-,7271302-7271373^7271468-,7271302-7271377^7271468-"; sources "Undefined,Undefined,Undefined,Undefined,Undefined"; NMorMRNA "…
chr1	Undefined	as_event	7271468	7272337	.	+	.	transcript_id "MSTRG.1229.10/MSTRG.1229.4/MSTRG.1229.6/MSTRG.1229.7,MSTRG.1229.3"; gene_id "chr1:7265286-7273208W"; flanks "7271468-,7272337-"; structure "1^,2^"; splice_chain "7271620^,7271652^"; sources "Undefined,Undefined"; NMorMRNA "null"; degree "4"; dimension "2_2";
chr1	Undefined	as_event	7271373	7272337	.	+	.	transcript_id "MSTRG.1229.13,MSTRG.1229.4/MSTRG.1229.6,MSTRG.1229.3"; gene_id "chr1:7265286-7273208W"; flanks "7271373^,7272337-"; structure "1-4^,2-3^,2-4^"; splice_chain "7271448-7271652^,7271468-7271620^,7271468-7271652^"; sources "Undefined,Undefined,Undefined"; NMorMRNA "null"; degree "9"; dimension "3_3";
chr1	Undefined	as_event	7271302	7272337	.	+	.	transcript_id "MSTRG.1229.13,MSTRG.1229.6,MSTRG.1229.3,MSTRG.1229.10"; gene_id "chr1:7265286-7273208W"; flanks "7271302-,7272337-"; structure "1^3-6^,1^4-5^,1^4-6^,2^4-5^"; splice_chain "7271373^7271448-7271652^,7271373^7271468-7271620^,7271373^7271468-7271652^,7271377^7271468-7271620^"; sources "Undefined,Undefined,Undefined,Undefined"; NMorMRNA "null"; degree "16"; dimension "4_4";
chr1	Undefined	as_event	7271296	7272337	.	+	.	transcript_id "MSTRG.1229.8,MSTRG.1229.11"; gene_id "chr1:7265286-7273208W"; flanks "7271296-,7272337-"; structure "1^,2^"; splice_chain "7271620^,7271652^"; sources "Undefined,Undefined"; NMorMRNA "null"; degree "4"; dimension "2_2";
chr1	Undefined	as_event	7271079	7272337	.	+	.	transcript_id "MSTRG.1229.8,MSTRG.1229.11,MSTRG.1229.13,MSTRG.1229.6,MSTRG.1229.3,MSTRG.1229.10"; gene_id "chr1:7265286-7273208W"; flanks "7271079^,7272337-"; structure "1-7^,1-8^,2-3^5-8^,2-3^6-7^,2-3^6-8^,2-4^6-7^"; splice_chain "7271296-7271620^,7271296-7271652^,7271302-7271373^7271448-7271652^,7271302-7271373^7271468-7271620^,7271302-7271373^7271468-7271652^,7271302-7271377^7271468-7271620^";…
chr1	Undefined	as_event	7270910	7272337	.	+	.	transcript_id "MSTRG.1229.8,MSTRG.1229.11,MSTRG.1229.13,MSTRG.1229.6,MSTRG.1229.3,MSTRG.1229.10,MSTRG.1229.4,MSTRG.1229.7,Os01t0231500-02"; gene_id "chr1:7265286-7273208W"; flanks "7270910-,7272337-"; structure "1^2-8^,1^2-9^,1^3-4^6-9^,1^3-4^7-8^,1^3-4^7-9^,1^3-5^7-8^,4^7-8^,5^7-8^,8^"; splice_chain "7271079^7271296-7271620^,7271079^7271296-7271652^,7271079^7271302-7271373^7271448-7271652^,72710…
chr1	Undefined	as_event	7271468	7272357	.	+	.	transcript_id "MSTRG.1229.12/MSTRG.1229.16/MSTRG.1229.5,MSTRG.1229.1/MSTRG.1229.14/MSTRG.1229.9"; gene_id "chr1:7265286-7273208W"; flanks "7271468-,7272357-"; structure "1^,2^"; splice_chain "7271620^,7271652^"; sources "Undefined,Undefined"; NMorMRNA "null"; degree "4"; dimension "2_2";
chr1	Undefined	as_event	7271652	7272468	.	+	.	transcript_id "MSTRG.1229.11/MSTRG.1229.3,MSTRG.1229.1/MSTRG.1229.14/MSTRG.1229.9"; gene_id "chr1:7265286-7273208W"; flanks "7271652^,7272468^"; structure "1-,2-"; splice_chain "7272337-,7272357-"; sources "Undefined,Undefined"; NMorMRNA "null"; degree "4"; dimension "2_2";
chr1	Undefined	as_event	7271620	7272468	.	+	.	transcript_id "MSTRG.1229.10/MSTRG.1229.4/MSTRG.1229.6/MSTRG.1229.7/MSTRG.1229.8,MSTRG.1229.12/MSTRG.1229.16/MSTRG.1229.5"; gene_id "chr1:7265286-7273208W"; flanks "7271620^,7272468^"; structure "1-,2-"; splice_chain "7272337-,7272357-"; sources "Undefined,Undefined"; NMorMRNA "null"; degree "4"; dimension "2_2";
chr1	Undefined	as_event	7271468	7272468	.	+	.	transcript_id "MSTRG.1229.10/MSTRG.1229.4/MSTRG.1229.6/MSTRG.1229.7,MSTRG.1229.12/MSTRG.1229.16/MSTRG.1229.5,MSTRG.1229.3,MSTRG.1229.1/MSTRG.1229.14/MSTRG.1229.9"; gene_id "chr1:7265286-7273208W"; flanks "7271468-,7272468^"; structure "1^3-,1^4-,2^3-,2^4-"; splice_chain "7271620^7272337-,7271620^7272357-,7271652^7272337-,7271652^7272357-"; sources "Undefined,Undefined,Undefined,Undefined"; NMorMR…
chr1	Undefined	as_event	7271296	7272468	.	+	.	transcript_id "MSTRG.1229.9,MSTRG.1229.5,MSTRG.1229.8,MSTRG.1229.11"; gene_id "chr1:7265286-7273208W"; flanks "7271296-,7272468^"; structure "1^3-5^7-,2^3-4^7-,4^6-,5^6-"; splice_chain "7271373^7271468-7271652^7272357-,7271377^7271468-7271620^7272357-,7271620^7272337-,7271652^7272337-"; sources "Undefined,Undefined,Undefined,Undefined"; NMorMRNA "null"; degree "16"; dimension "4_4";
chr1	Undefined	as_event	7271079	7272468	.	+	.	transcript_id "MSTRG.1229.9,MSTRG.1229.5,MSTRG.1229.8,MSTRG.1229.11,MSTRG.1229.6,MSTRG.1229.16,MSTRG.1229.3,MSTRG.1229.1,MSTRG.1229.10,MSTRG.1229.12,MSTRG.1229.14"; gene_id "chr1:7265286-7273208W"; flanks "7271079^,7272468^"; structure "1-3^5-7^9-,1-4^5-6^9-,1-6^8-,1-7^8-,2-3^5-6^8-,2-3^5-6^9-,2-3^5-7^8-,2-3^5-7^9-,2-4^5-6^8-,2-4^5-6^9-,2-4^5-7^9-"; splice_chain "7271296-7271373^7271468-7271652^7…
chr1	Undefined	as_event	7270910	7272468	.	+	.	transcript_id "MSTRG.1229.9,MSTRG.1229.5,MSTRG.1229.8,MSTRG.1229.11,MSTRG.1229.6,MSTRG.1229.16,MSTRG.1229.3,MSTRG.1229.1,MSTRG.1229.10,MSTRG.1229.12,MSTRG.1229.14,MSTRG.1229.4,MSTRG.1229.7"; gene_id "chr1:7265286-7273208W"; flanks "7270910-,7272468^"; structure "1^2-4^6-8^10-,1^2-5^6-7^10-,1^2-7^9-,1^2-8^9-,1^3-4^6-7^9-,1^3-4^6-7^10-,1^3-4^6-8^9-,1^3-4^6-8^10-,1^3-5^6-7^9-,1^3-5^6-7^10-,1^3-5^6-8…
chr1	Undefined	as_event	7272337	7273208	.	+	.	transcript_id "Os01t0231500-02,MSTRG.1229.10/MSTRG.1229.11/MSTRG.1229.3/MSTRG.1229.4/MSTRG.1229.6/MSTRG.1229.7/MSTRG.1229.8,MSTRG.1229.13"; gene_id "chr1:7265286-7273208W"; flanks "7272337-,7273208]"; structure "0,1^2-,3^4-"; splice_chain ",7272468^7272623-,7272719^7272835-"; sources "Undefined,Undefined,Undefined"; NMorMRNA "null"; degree "9"; dimension "3_3";
chr1	Undefined	as_event	7271652	7273208	.	+	.	transcript_id "MSTRG.1229.11/MSTRG.1229.3,MSTRG.1229.13,MSTRG.1229.1/MSTRG.1229.14/MSTRG.1229.9"; gene_id "chr1:7265286-7273208W"; flanks "7271652^,7273208]"; structure "1-3^4-,1-5^6-,2-3^4-"; splice_chain "7272337-7272468^7272623-,7272337-7272719^7272835-,7272357-7272468^7272623-"; sources "Undefined,Undefined,Undefined"; NMorMRNA "null"; degree "9"; dimension "3_3";
chr1	Undefined	as_event	7271620	7273208	.	+	.	transcript_id "Os01t0231500-02,MSTRG.1229.10/MSTRG.1229.4/MSTRG.1229.6/MSTRG.1229.7/MSTRG.1229.8,MSTRG.1229.12/MSTRG.1229.16/MSTRG.1229.5"; gene_id "chr1:7265286-7273208W"; flanks "7271620^,7273208]"; structure "1-,1-3^4-,2-3^4-"; splice_chain "7272337-,7272337-7272468^7272623-,7272357-7272468^7272623-"; sources "Undefined,Undefined,Undefined"; NMorMRNA "null"; degree "9"; dimension "3_3";
chr1	Undefined	as_event	7271373	7273208	.	+	.	transcript_id "MSTRG.1229.13,MSTRG.1229.4/MSTRG.1229.6,MSTRG.1229.16,MSTRG.1229.3,MSTRG.1229.1/MSTRG.1229.9"; gene_id "chr1:7265286-7273208W"; flanks "7271373^,7273208]"; structure "1-4^5-9^10-,2-3^5-7^8-,2-3^6-7^8-,2-4^5-7^8-,2-4^6-7^8-"; splice_chain "7271448-7271652^7272337-7272719^7272835-,7271468-7271620^7272337-7272468^7272623-,7271468-7271620^7272357-7272468^7272623-,7271468-7271652^727233…
chr1	Undefined	as_event	7271302	7273208	.	+	.	transcript_id "MSTRG.1229.13,MSTRG.1229.6,MSTRG.1229.16,MSTRG.1229.3,MSTRG.1229.1,MSTRG.1229.10,MSTRG.1229.12,MSTRG.1229.14"; gene_id "chr1:7265286-7273208W"; flanks "7271302-,7273208]"; structure "1^3-6^7-11^12-,1^4-5^7-9^10-,1^4-5^8-9^10-,1^4-6^7-9^10-,1^4-6^8-9^10-,2^4-5^7-9^10-,2^4-5^8-9^10-,2^4-6^8-9^10-"; splice_chain "7271373^7271448-7271652^7272337-7272719^7272835-,7271373^7271468-7271620…
chr1	Undefined	as_event	7271079	7273208	.	+	.	transcript_id "MSTRG.1229.9,MSTRG.1229.5,MSTRG.1229.8,MSTRG.1229.11,MSTRG.1229.13,MSTRG.1229.6,MSTRG.1229.16,MSTRG.1229.3,MSTRG.1229.1,MSTRG.1229.10,MSTRG.1229.12,MSTRG.1229.14"; gene_id "chr1:7265286-7273208W"; flanks "7271079^,7273208]"; structure "1-3^6-8^10-11^12-,1-4^6-7^10-11^12-,1-7^9-11^12-,1-8^9-11^12-,2-3^5-8^9-13^14-,2-3^6-7^9-11^12-,2-3^6-7^10-11^12-,2-3^6-8^9-11^12-,2-3^6-8^10-11^12-…
chr1	Undefined	as_event	7270910	7273208	.	+	.	transcript_id "MSTRG.1229.9,MSTRG.1229.5,MSTRG.1229.8,MSTRG.1229.11,MSTRG.1229.13,MSTRG.1229.6,MSTRG.1229.16,MSTRG.1229.3,MSTRG.1229.1,MSTRG.1229.10,MSTRG.1229.12,MSTRG.1229.14,MSTRG.1229.4,MSTRG.1229.7,Os01t0231500-02"; gene_id "chr1:7265286-7273208W"; flanks "7270910-,7273208]"; structure "1^2-4^7-9^11-12^13-,1^2-5^7-8^11-12^13-,1^2-8^10-12^13-,1^2-9^10-12^13-,1^3-4^6-9^10-14^15-,1^3-4^7-8^10-1…
chr1	Undefined	as_event	7287974	7288252	.	+	.	transcript_id "MSTRG.1234.3/MSTRG.1234.5,MSTRG.1234.4/Os01t0231900-01"; gene_id "chr1:7287974-7294209W"; flanks "7287974[,7288252^"; structure "0,1^2-"; splice_chain ",7288033^7288195-"; sources "Undefined,Undefined"; NMorMRNA "null"; degree "4"; dimension "2_2";
chr1	Undefined	as_event	7288252	7289003	.	+	.	transcript_id "MSTRG.1234.3/MSTRG.1234.5/MSTRG.1234.8/Os01t0231900-01,MSTRG.1234.4"; gene_id "chr1:7287974-7294209W"; flanks "7288252^,7289003^"; structure "1-,2-"; splice_chain "7288862-,7288905-"; sources "Undefined,Undefined"; NMorMRNA "null"; degree "4"; dimension "2_2";
chr1	Undefined	as_event	7288195	7289003	.	+	.	transcript_id "MSTRG.1234.1/MSTRG.1234.2/MSTRG.1234.6,Os01t0231900-01,MSTRG.1234.4"; gene_id "chr1:7287974-7294209W"; flanks "7288195-,7289003^"; structure "0,1^2-,1^3-"; splice_chain ",7288252^7288862-,7288252^7288905-"; sources "Undefined,Undefined,Undefined"; NMorMRNA "null"; degree "9"; dimension "3_3";
chr1	Undefined	as_event	7287974	7289003	.	+	.	transcript_id "MSTRG.1234.1/MSTRG.1234.2/MSTRG.1234.6,Os01t0231900-01,MSTRG.1234.4,MSTRG.1234.3/MSTRG.1234.5"; gene_id "chr1:7287974-7294209W"; flanks "7287974[,7289003^"; structure "1^2-,1^2-3^4-,1^2-3^5-,3^4-"; splice_chain "7288033^7288195-,7288033^7288195-7288252^7288862-,7288033^7288195-7288252^7288905-,7288252^7288862-"; sources "Undefined,Undefined,Undefined,Undefined"; NMorMRNA "null"; de…
chr1	Undefined	as_event	7289003	7289426	.	+	.	transcript_id "MSTRG.1234.5/MSTRG.1234.8,MSTRG.1234.1/MSTRG.1234.2/MSTRG.1234.3/MSTRG.1234.4/Os01t0231900-01,MSTRG.1234.6"; gene_id "chr1:7287974-7294209W"; flanks "7289003^,7289426^"; structure "1-,2-,3-"; splice_chain "7289170-,7289215-,7289236-"; sources "Undefined,Undefined,Undefined"; NMorMRNA "null"; degree "9"; dimension "3_3";
chr1	Undefined	as_event	7291329	7292249	.	+	.	transcript_id "MSTRG.1234.1/MSTRG.1234.4/MSTRG.1234.5/MSTRG.1234.6,MSTRG.1234.2/MSTRG.1234.3/MSTRG.1234.8/Os01t0231900-01"; gene_id "chr1:7287974-7294209W"; flanks "7291329-,7292249^"; structure "0,1^2-"; splice_chain ",7291602^7292137-"; sources "Undefined,Undefined"; NMorMRNA "null"; degree "4"; dimension "2_2";
chr1	Undefined	as_event	7292330	7292703	.	+	.	transcript_id "MSTRG.1234.6,MSTRG.1234.1/MSTRG.1234.2/MSTRG.1234.3/MSTRG.1234.4/MSTRG.1234.5/MSTRG.1234.8/Os01t0231900-01"; gene_id "chr1:7287974-7294209W"; flanks "7292330-,7292703^"; structure "0,1^2-"; splice_chain ",7292395^7292613-"; sources "Undefined,Undefined"; NMorMRNA "null"; degree "4"; dimension "2_2";
chr1	Undefined	as_event	7293699	7294209	.	+	.	transcript_id "MSTRG.1234.1/MSTRG.1234.2/MSTRG.1234.3/MSTRG.1234.4/MSTRG.1234.5/MSTRG.1234.6/MSTRG.1234.8/Os01t0231900-01,MSTRG.1234.9"; gene_id "chr1:7287974-7294209W"; flanks "7293699-,7294209]"; structure "0,1^2-"; splice_chain ",7293884^7294067-"; sources "Undefined,Undefined"; NMorMRNA "null"; degree "4"; dimension "2_2";
chr1	Undefined	as_event	7297781	7298619	.	+	.	transcript_id "MSTRG.1235.1,Os01t0232000-00"; gene_id "chr1:7297781-7298619W"; flanks "7297781[,7298619]"; structure "0,1^2-"; splice_chain ",7297907^7297991-"; sources "Undefined,Undefined"; NMorMRNA "null"; degree "4"; dimension "2_2";
chr1	Undefined	as_event	7326572	7326982	.	+	.	transcript_id "MSTRG.1239.3,MSTRG.1239.1/Os01t0232300-01"; gene_id "chr1:7325060-7332216W"; flanks "7326572-,7326982^"; structure "0,1^2-"; splice_chain ",7326661^7326938-"; sources "Undefined,Undefined"; NMorMRNA "null"; degree "4"; dimension "2_2";
chr1	Undefined	as_event	7327790	7328541	.	+	.	transcript_id "MSTRG.1239.3,MSTRG.1239.1"; gene_id "chr1:7325060-7332216W"; flanks "7327790^,7328541^"; structure "1-,2-"; splice_chain "7327914-,7328276-"; sources "Undefined,Undefined"; NMorMRNA "null"; degree "4"; dimension "2_2";
chr1	Undefined	as_event	7327401	7329430	.	+	.	transcript_id "Os01t0232300-01,MSTRG.1239.3,MSTRG.1239.1"; gene_id "chr1:7325060-7332216W"; flanks "7327401-,7329430^"; structure "0,1^2-4^5-,1^3-4^5-"; splice_chain ",7327790^7327914-7328541^7329292-,7327790^7328276-7328541^7329292-"; sources "Undefined,Undefined,Undefined"; NMorMRNA "null"; degree "9"; dimension "3_3";
chr1	Undefined	as_event	7340923	7342230	.	+	.	transcript_id "Os01t0232500-01,MSTRG.1242.2"; gene_id "chr1:7340717-7345302W"; flanks "7340923-,7342230-"; structure "1^,2^"; splice_chain "7341040^,7341085^"; sources "Undefined,Undefined"; NMorMRNA "null"; degree "4"; dimension "2_2";
chr1	Undefined	as_event	7348585	7349082	.	+	.	transcript_id "MSTRG.1244.3,MSTRG.1244.2/Os01t0232700-01"; gene_id "chr1:7348585-7352104W"; flanks "7348585[,7349082^"; structure "0,1^2-"; splice_chain ",7348886^7349030-"; sources "Undefined,Undefined"; NMorMRNA "null"; degree "4"; dimension "2_2";
chr1	Undefined	as_event	7348585	7349247	.	+	.	transcript_id "MSTRG.1244.1,MSTRG.1244.2/Os01t0232700-01,MSTRG.1244.3"; gene_id "chr1:7348585-7352104W"; flanks "7348585[,7349247^"; structure "0,1^2-3^4-,3^4-"; splice_chain ",7348886^7349030-7349082^7349175-,7349082^7349175-"; sources "Undefined,Undefined,Undefined"; NMorMRNA "null"; degree "9"; dimension "3_3";
chr1	Undefined	as_event	7350679	7350865	.	+	.	transcript_id "MSTRG.1244.1/MSTRG.1244.3/Os01t0232700-01/Os01t0232700-02,MSTRG.1244.2"; gene_id "chr1:7348585-7352104W"; flanks "7350679^,7350865^"; structure "1-,2-"; splice_chain "7350755-,7350760-"; sources "Undefined,Undefined"; NMorMRNA "null"; degree "4"; dimension "2_2";
chr1	Undefined	as_event	7420760	7421224	.	+	.	transcript_id "Os01t0234100-01,MSTRG.1256.2"; gene_id "chr1:7417303-7422586W"; flanks "7420760-,7421224^"; structure "1^3-,2^4-"; splice_chain "7420964^7421132-,7420966^7421134-"; sources "Undefined,Undefined"; NMorMRNA "null"; degree "4"; dimension "2_2";
chr1	Undefined	as_event	7458221	7459061	.	+	.	transcript_id "Os01t0235100-01,MSTRG.1267.2"; gene_id "chr1:7457835-7459834W"; flanks "7458221^,7459061^"; structure "1-,2-"; splice_chain "7458826-,7458835-"; sources "Undefined,Undefined"; NMorMRNA "null"; degree "4"; dimension "2_2";
chr1	Undefined	as_event	7506860	7507723	.	+	.	transcript_id "MSTRG.1279.1/MSTRG.1279.2,MSTRG.1279.3"; gene_id "chr1:7506282-7511672W"; flanks "7506860-,7507723^"; structure "0,1^2-"; splice_chain ",7507550^7507654-"; sources "Undefined,Undefined"; NMorMRNA "null"; degree "4"; dimension "2_2";
chr1	Undefined	as_event	7683044	7683358	.	+	.	transcript_id "Os01t0238900-01,MSTRG.1309.1"; gene_id "chr1:7679009-7685849W"; flanks "7683044-,7683358^"; structure "0,1^2-"; splice_chain ",7683097^7683273-"; sources "Undefined,Undefined"; NMorMRNA "null"; degree "4"; dimension "2_2";
chr1	Undefined	as_event	7893655	7894231	.	+	.	transcript_id "Os01t0243100-01,MSTRG.1344.2"; gene_id "chr1:7891541-7894877W"; flanks "7893655^,7894231-"; structure "0,1-2^"; splice_chain ",7893748-7893837^"; sources "Undefined,Undefined"; NMorMRNA "null"; degree "4"; dimension "2_2";
chr1	Undefined	as_event	8130258	8130932	.	+	.	transcript_id "Os01t0247600-01,MSTRG.1379.1"; gene_id "chr1:8130258-8131321W"; flanks "8130258[,8130932]"; structure "0,1^2-"; splice_chain ",8130617^8130700-"; sources "Undefined,Undefined"; NMorMRNA "null"; degree "4"; dimension "2_2";
chr1	Undefined	as_event	8171633	8171960	.	+	.	transcript_id "Os01t0248400-01,MSTRG.1386.2"; gene_id "chr1:8170309-8175907W"; flanks "8171633-,8171960-"; structure "1^,2^"; splice_chain "8171742^,8171750^"; sources "Undefined,Undefined"; NMorMRNA "null"; degree "4"; dimension "2_2";
chr1	Undefined	as_event	8171633	8171997	.	+	.	transcript_id "MSTRG.1386.3,Os01t0248400-01,MSTRG.1386.2"; gene_id "chr1:8170309-8175907W"; flanks "8171633-,8171997^"; structure "0,1^3-,2^3-"; splice_chain ",8171742^8171960-,8171750^8171960-"; sources "Undefined,Undefined,Undefined"; NMorMRNA "null"; degree "9"; dimension "3_3";
chr1	Undefined	as_event	8278879	8279001	.	+	.	transcript_id "MSTRG.1403.1/MSTRG.1403.2/Os01t0250900-01,MSTRG.1403.4"; gene_id "chr1:8275434-8283975W"; flanks "8278879^,8279001^"; structure "1-,2-"; splice_chain "8278954-,8278965-"; sources "Undefined,Undefined"; NMorMRNA "null"; degree "4"; dimension "2_2";
chr1	Undefined	as_event	8279001	8279170	.	+	.	transcript_id "MSTRG.1403.2/MSTRG.1403.4,MSTRG.1403.1/Os01t0250900-01"; gene_id "chr1:8275434-8283975W"; flanks "8279001^,8279170^"; structure "1-,2-"; splice_chain "8279078-,8279093-"; sources "Undefined,Undefined"; NMorMRNA "null"; degree "4"; dimension "2_2";
chr1	Undefined	as_event	8280574	8281537	.	+	.	transcript_id "MSTRG.1403.4,MSTRG.1403.1/MSTRG.1403.2/Os01t0250900-01"; gene_id "chr1:8275434-8283975W"; flanks "8280574-,8281537^"; structure "0,1^2-"; splice_chain ",8280737^8281403-"; sources "Undefined,Undefined"; NMorMRNA "null"; degree "4"; dimension "2_2";
chr1	Undefined	as_event	8281896	8282864	.	+	.	transcript_id "MSTRG.1403.1/MSTRG.1403.2,Os01t0250900-01"; gene_id "chr1:8275434-8283975W"; flanks "8281896^,8282864-"; structure "0,1-2^"; splice_chain ",8282000-8282046^"; sources "Undefined,Undefined"; NMorMRNA "null"; degree "4"; dimension "2_2";
chr1	Undefined	as_event	8281766	8282926	.	+	.	transcript_id "MSTRG.1403.4,Os01t0250900-01,MSTRG.1403.1/MSTRG.1403.2"; gene_id "chr1:8275434-8283975W"; flanks "8281766-,8282926^"; structure "0,1^2-3^4-,1^4-"; splice_chain ",8281896^8282000-8282046^8282864-,8281896^8282864-"; sources "Undefined,Undefined,Undefined"; NMorMRNA "null"; degree "9"; dimension "3_3";
chr1	Undefined	as_event	8285551	8286032	.	+	.	transcript_id "MSTRG.1404.1,MSTRG.1404.2"; gene_id "chr1:8284160-8289122W"; flanks "8285551-,8286032-"; structure "1^,2^"; splice_chain "8285782^,8285896^"; sources "Undefined,Undefined"; NMorMRNA "null"; degree "4"; dimension "2_2";
chr1	Undefined	as_event	8285551	8286389	.	+	.	transcript_id "Os01t0251000-01,MSTRG.1404.1,MSTRG.1404.2"; gene_id "chr1:8284160-8289122W"; flanks "8285551-,8286389^"; structure "1^4-,2^5-,3^5-"; splice_chain "8285780^8286030-,8285782^8286032-,8285896^8286032-"; sources "Undefined,Undefined,Undefined"; NMorMRNA "null"; degree "9"; dimension "3_3";
chr1	Undefined	as_event	8299978	8300262	.	+	.	transcript_id "MSTRG.1407.2,MSTRG.1407.1/Os01t0251200-01"; gene_id "chr1:8297600-8302534W"; flanks "8299978-,8300262-"; structure "1^,2^"; splice_chain "8300098^,8300186^"; sources "Undefined,Undefined"; NMorMRNA "null"; degree "4"; dimension "2_2";
chr1	Undefined	as_event	8344898	8345324	.	+	.	transcript_id "MSTRG.1419.1,Os01t0252600-00"; gene_id "chr1:8344471-8346041W"; flanks "8344898-,8345324^"; structure "0,1^2-"; splice_chain ",8345037^8345136-"; sources "Undefined,Undefined"; NMorMRNA "null"; degree "4"; dimension "2_2";
chr1	Undefined	as_event	8540755	8541132	.	+	.	transcript_id "MSTRG.1450.2,Os01t0256400-01"; gene_id "chr1:8540583-8544587W"; flanks "8540755[,8541132-"; structure "1^,2^"; splice_chain "8541019^,8541024^"; sources "Undefined,Undefined"; NMorMRNA "null"; degree "4"; dimension "2_2";
chr1	Undefined	as_event	8683337	8684222	.	+	.	transcript_id "MSTRG.1470.2/MSTRG.1470.3,Os01t0259200-02"; gene_id "chr1:8683011-8687579W"; flanks "8683337^,8684222^"; structure "1-,2-"; splice_chain "8683945-,8684014-"; sources "Undefined,Undefined"; NMorMRNA "null"; degree "4"; dimension "2_2";
chr1	Undefined	as_event	8684222	8684657	.	+	.	transcript_id "MSTRG.1470.2/Os01t0259200-01/Os01t0259200-02,MSTRG.1470.3"; gene_id "chr1:8683011-8687579W"; flanks "8684222^,8684657^"; structure "1-,2-"; splice_chain "8684468-,8684478-"; sources "Undefined,Undefined"; NMorMRNA "null"; degree "4"; dimension "2_2";
chr1	Undefined	as_event	8717860	8718844	.	+	.	transcript_id "MSTRG.1476.3,MSTRG.1476.1"; gene_id "chr1:8716107-8721520W"; flanks "8717860^,8718844^"; structure "1-,2-"; splice_chain "8717976-,8718739-"; sources "Undefined,Undefined"; NMorMRNA "null"; degree "4"; dimension "2_2";
chr1	Undefined	as_event	8773106	8773672	.	+	.	transcript_id "MSTRG.1489.1,MSTRG.1489.3"; gene_id "chr1:8767828-8773672W"; flanks "8773106-,8773672]"; structure "1^4-,2^3-"; splice_chain "8773527^8773573-,8773534^8773557-"; sources "Undefined,Undefined"; NMorMRNA "null"; degree "4"; dimension "2_2";
chr1	Undefined	as_event	8786918	8788720	.	+	.	transcript_id "MSTRG.1491.1/Os01t0261100-01,MSTRG.1491.2"; gene_id "chr1:8786109-8792412W"; flanks "8786918^,8788720^"; structure "1-,2-"; splice_chain "8788286-,8788290-"; sources "Undefined,Undefined"; NMorMRNA "null"; degree "4"; dimension "2_2";
chr1	Undefined	as_event	8788720	8790561	.	+	.	transcript_id "Os01t0261100-01,MSTRG.1491.1/MSTRG.1491.2"; gene_id "chr1:8786109-8792412W"; flanks "8788720^,8790561^"; structure "1-,2-"; splice_chain "8790527-,8790530-"; sources "Undefined,Undefined"; NMorMRNA "null"; degree "4"; dimension "2_2";
chr1	Undefined	as_event	8811338	8811589	.	+	.	transcript_id "MSTRG.1494.2,MSTRG.1494.5"; gene_id "chr1:8809389-8813014W"; flanks "8811338-,8811589^"; structure "1^4-,2^3-"; splice_chain "8811377^8811455-,8811380^8811453-"; sources "Undefined,Undefined"; NMorMRNA "null"; degree "4"; dimension "2_2";
chr1	Undefined	as_event	8811338	8811901	.	+	.	transcript_id "MSTRG.1494.2,MSTRG.1494.5,MSTRG.1494.3"; gene_id "chr1:8809389-8813014W"; flanks "8811338-,8811901-"; structure "1^5-6^,2^4-6^,3^"; splice_chain "8811377^8811455-8811589^,8811380^8811453-8811589^,8811396^"; sources "Undefined,Undefined,Undefined"; NMorMRNA "null"; degree "9"; dimension "3_3";
chr1	Undefined	as_event	8811380	8812038	.	+	.	transcript_id "MSTRG.1494.5,MSTRG.1494.4"; gene_id "chr1:8809389-8813014W"; flanks "8811380^,8812038^"; structure "1-2^4-,3-"; splice_chain "8811453-8811589^8811901-,8811899-"; sources "Undefined,Undefined"; NMorMRNA "null"; degree "4"; dimension "2_2";
chr1	Undefined	as_event	8811338	8812038	.	+	.	transcript_id "Os01t0261500-02,MSTRG.1494.2,MSTRG.1494.5,MSTRG.1494.4,MSTRG.1494.3"; gene_id "chr1:8809389-8813014W"; flanks "8811338-,8812038^"; structure "0,1^5-6^8-,2^4-6^8-,2^7-,3^8-"; splice_chain ",8811377^8811455-8811589^8811901-,8811380^8811453-8811589^8811901-,8811380^8811899-,8811396^8811901-"; sources "Undefined,Undefined,Undefined,Undefined,Undefined"; NMorMRNA "null"; degree "25"; di…
chr1	Undefined	as_event	8810477	8812038	.	+	.	transcript_id "Os01t0261500-01,MSTRG.1494.2,MSTRG.1494.5,MSTRG.1494.4,MSTRG.1494.3"; gene_id "chr1:8809389-8813014W"; flanks "8810477-,8812038^"; structure "0,1^2-3^7-8^10-,1^2-4^6-8^10-,1^2-4^9-,1^2-5^10-"; splice_chain ",8810555^8811338-8811377^8811455-8811589^8811901-,8810555^8811338-8811380^8811453-8811589^8811901-,8810555^8811338-8811380^8811899-,8810555^8811338-8811396^8811901-"; sources "U…
chr1	Undefined	as_event	8892615	8893249	.	+	.	transcript_id "Os01t0262700-02,MSTRG.1502.3/MSTRG.1502.4"; gene_id "chr1:8892598-8900134W"; flanks "8892615[,8893249^"; structure "0,1^2-"; splice_chain ",8892925^8893184-"; sources "Undefined,Undefined"; NMorMRNA "null"; degree "4"; dimension "2_2";
chr1	Undefined	as_event	8892598	8893249	.	+	.	transcript_id "Os01t0262700-01,MSTRG.1502.1"; gene_id "chr1:8892598-8900134W"; flanks "8892598[,8893249^"; structure "0,1^2-"; splice_chain ",8892746^8893184-"; sources "Undefined,Undefined"; NMorMRNA "null"; degree "4"; dimension "2_2";
chr1	Undefined	as_event	8892746	8894137	.	+	.	transcript_id "MSTRG.1502.6,MSTRG.1502.1"; gene_id "chr1:8892598-8900134W"; flanks "8892746^,8894137-"; structure "0,1-2^3-4^5-6^"; splice_chain ",8893184-8893249^8893772-8893875^8893973-8894011^"; sources "Undefined,Undefined"; NMorMRNA "null"; degree "4"; dimension "2_2";
chr1	Undefined	as_event	8895748	8895959	.	+	.	transcript_id "Os01t0262700-02,MSTRG.1502.1/MSTRG.1502.3/MSTRG.1502.4/MSTRG.1502.6/MSTRG.1502.7/MSTRG.1502.8/Os01t0262700-01"; gene_id "chr1:8892598-8900134W"; flanks "8895748-,8895959^"; structure "0,1^2-"; splice_chain ",8895813^8895917-"; sources "Undefined,Undefined"; NMorMRNA "null"; degree "4"; dimension "2_2";
chr1	Undefined	as_event	8898421	8899051	.	+	.	transcript_id "MSTRG.1502.7,MSTRG.1502.1/MSTRG.1502.4"; gene_id "chr1:8892598-8900134W"; flanks "8898421-,8899051^"; structure "0,1^2-"; splice_chain ",8898513^8898985-"; sources "Undefined,Undefined"; NMorMRNA "null"; degree "4"; dimension "2_2";
chr1	Undefined	as_event	8898513	8899309	.	+	.	transcript_id "MSTRG.1502.3/MSTRG.1502.6/MSTRG.1502.8/Os01t0262700-02,MSTRG.1502.1/MSTRG.1502.4"; gene_id "chr1:8892598-8900134W"; flanks "8898513^,8899309-"; structure "0,1-2^"; splice_chain ",8898985-8899051^"; sources "Undefined,Undefined"; NMorMRNA "null"; degree "4"; dimension "2_2";
chr1	Undefined	as_event	8898421	8899309	.	+	.	transcript_id "MSTRG.1502.3/MSTRG.1502.6/MSTRG.1502.8/Os01t0262700-02,MSTRG.1502.1/MSTRG.1502.4,MSTRG.1502.7"; gene_id "chr1:8892598-8900134W"; flanks "8898421-,8899309-"; structure "1^,1^2-3^,3^"; splice_chain "8898513^,8898513^8898985-8899051^,8899051^"; sources "Undefined,Undefined,Undefined"; NMorMRNA "null"; degree "9"; dimension "3_3";
chr1	Undefined	as_event	8925408	8927343	.	+	.	transcript_id "MSTRG.1507.2,Os01t0263500-01"; gene_id "chr1:8925072-8929646W"; flanks "8925408^,8927343^"; structure "1-,2-"; splice_chain "8927178-,8927182-"; sources "Undefined,Undefined"; NMorMRNA "null"; degree "4"; dimension "2_2";
chr1	Undefined	as_event	8935384	8936399	.	+	.	transcript_id "MSTRG.1509.2/Os01t0263600-02,Os01t0263600-01"; gene_id "chr1:8931299-8948832W"; flanks "8935384-,8936399-"; structure "1^,2^"; splice_chain "8935591^,8935653^"; sources "Undefined,Undefined"; NMorMRNA "null"; degree "4"; dimension "2_2";
chr1	Undefined	as_event	8988911	8989480	.	+	.	transcript_id "Os01t0264500-01,MSTRG.1520.1"; gene_id "chr1:8988911-8992577W"; flanks "8988911[,8989480-"; structure "1^,2^"; splice_chain "8989077^,8989254^"; sources "Undefined,Undefined"; NMorMRNA "null"; degree "4"; dimension "2_2";
chr1	Undefined	as_event	9016166	9016581	.	+	.	transcript_id "MSTRG.1522.1,MSTRG.1522.2"; gene_id "chr1:9012952-9016581W"; flanks "9016166^,9016581]"; structure "1-,2-"; splice_chain "9016274-,9016279-"; sources "Undefined,Undefined"; NMorMRNA "null"; degree "4"; dimension "2_2";
chr1	Undefined	as_event	9076998	9078475	.	+	.	transcript_id "MSTRG.1530.2,Os01t0266000-01"; gene_id "chr1:9074613-9083797W"; flanks "9076998^,9078475-"; structure "0,1-2^"; splice_chain ",9077088-9077241^"; sources "Undefined,Undefined"; NMorMRNA "null"; degree "4"; dimension "2_2";
chr1	Undefined	as_event	9081570	9082006	.	+	.	transcript_id "MSTRG.1530.2/Os01t0266000-01,MSTRG.1530.3"; gene_id "chr1:9074613-9083797W"; flanks "9081570^,9082006^"; structure "1-,2-"; splice_chain "9081866-,9081872-"; sources "Undefined,Undefined"; NMorMRNA "null"; degree "4"; dimension "2_2";
chr1	Undefined	as_event	9096103	9096340	.	+	.	transcript_id "MSTRG.1532.3/Os01t0266200-01,MSTRG.1532.1/MSTRG.1532.2"; gene_id "chr1:9094821-9102786W"; flanks "9096103^,9096340^"; structure "1-,2-"; splice_chain "9096181-,9096212-"; sources "Undefined,Undefined"; NMorMRNA "null"; degree "4"; dimension "2_2";
chr1	Undefined	as_event	9096625	9096875	.	+	.	transcript_id "MSTRG.1532.1/MSTRG.1532.2/MSTRG.1532.3/Os01t0266200-01,MSTRG.1532.5"; gene_id "chr1:9094821-9102786W"; flanks "9096625^,9096875^"; structure "1-,2-"; splice_chain "9096726-,9096736-"; sources "Undefined,Undefined"; NMorMRNA "null"; degree "4"; dimension "2_2";
chr1	Undefined	as_event	9096875	9097004	.	+	.	transcript_id "MSTRG.1532.1/MSTRG.1532.3/MSTRG.1532.5/Os01t0266200-01,MSTRG.1532.2"; gene_id "chr1:9094821-9102786W"; flanks "9096875^,9097004^"; structure "1-,2-"; splice_chain "9096951-,9096975-"; sources "Undefined,Undefined"; NMorMRNA "null"; degree "4"; dimension "2_2";
chr1	Undefined	as_event	9159753	9160411	.	+	.	transcript_id "MSTRG.1543.1/MSTRG.1543.2,MSTRG.1543.3/MSTRG.1543.4/MSTRG.1543.5"; gene_id "chr1:9159753-9165677W"; flanks "9159753[,9160411-"; structure "1^,2^"; splice_chain "9160271^,9160311^"; sources "Undefined,Undefined"; NMorMRNA "null"; degree "4"; dimension "2_2";
chr1	Undefined	as_event	9161186	9163722	.	+	.	transcript_id "MSTRG.1543.1/MSTRG.1543.5,MSTRG.1543.2/MSTRG.1543.3"; gene_id "chr1:9159753-9165677W"; flanks "9161186^,9163722^"; structure "1-,2-"; splice_chain "9161834-,9162037-"; sources "Undefined,Undefined"; NMorMRNA "null"; degree "4"; dimension "2_2";
chr1	Undefined	as_event	9159753	9163722	.	+	.	transcript_id "Os01t0267100-01,MSTRG.1543.1,MSTRG.1543.2,MSTRG.1543.5,MSTRG.1543.3"; gene_id "chr1:9159753-9165677W"; flanks "9159753[,9163722^"; structure "0,1^3-4^5-,1^3-4^6-,2^3-4^5-,2^3-4^6-"; splice_chain ",9160271^9160411-9161186^9161834-,9160271^9160411-9161186^9162037-,9160311^9160411-9161186^9161834-,9160311^9160411-9161186^9162037-"; sources "Undefined,Undefined,Undefined,Undefined,Unde…
chr1	Undefined	as_event	9161834	9163920	.	+	.	transcript_id "MSTRG.1543.4,MSTRG.1543.1/MSTRG.1543.5"; gene_id "chr1:9159753-9165677W"; flanks "9161834-,9163920^"; structure "0,1^2-"; splice_chain ",9163722^9163837-"; sources "Undefined,Undefined"; NMorMRNA "null"; degree "4"; dimension "2_2";
chr1	Undefined	as_event	9161186	9163920	.	+	.	transcript_id "MSTRG.1543.4,MSTRG.1543.1/MSTRG.1543.5,MSTRG.1543.2/MSTRG.1543.3"; gene_id "chr1:9159753-9165677W"; flanks "9161186^,9163920^"; structure "1-,1-3^4-,2-3^4-"; splice_chain "9161834-,9161834-9163722^9163837-,9162037-9163722^9163837-"; sources "Undefined,Undefined,Undefined"; NMorMRNA "null"; degree "9"; dimension "3_3";
chr1	Undefined	as_event	9159753	9163920	.	+	.	transcript_id "MSTRG.1543.1,MSTRG.1543.2,MSTRG.1543.4,MSTRG.1543.5,MSTRG.1543.3,Os01t0267100-01"; gene_id "chr1:9159753-9165677W"; flanks "9159753[,9163920^"; structure "1^3-4^5-7^8-,1^3-4^6-7^8-,2^3-4^5-,2^3-4^5-7^8-,2^3-4^6-7^8-,7^8-"; splice_chain "9160271^9160411-9161186^9161834-9163722^9163837-,9160271^9160411-9161186^9162037-9163722^9163837-,9160311^9160411-9161186^9161834-,9160311^9160411-…
chr1	Undefined	as_event	9231687	9232001	.	+	.	transcript_id "Os01t0268300-01/Os01t0268300-02,MSTRG.1557.2"; gene_id "chr1:9225213-9237025W"; flanks "9231687^,9232001^"; structure "1-,2-"; splice_chain "9231903-,9231910-"; sources "Undefined,Undefined"; NMorMRNA "null"; degree "4"; dimension "2_2";
chr1	Undefined	as_event	9265825	9266380	.	+	.	transcript_id "MSTRG.1561.1,MSTRG.1561.3/Os01t0268900-01"; gene_id "chr1:9264978-9268375W"; flanks "9265825-,9266380^"; structure "0,1^2-"; splice_chain ",9265877^9266249-"; sources "Undefined,Undefined"; NMorMRNA "null"; degree "4"; dimension "2_2";
chr1	Undefined	as_event	9373229	9373642	.	+	.	transcript_id "MSTRG.1577.3,MSTRG.1577.4"; gene_id "chr1:9370627-9374954W"; flanks "9373229-,9373642^"; structure "0,1^2-"; splice_chain ",9373309^9373427-"; sources "Undefined,Undefined"; NMorMRNA "null"; degree "4"; dimension "2_2";
chr1	Undefined	as_event	9373309	9373885	.	+	.	transcript_id "MSTRG.1577.1,MSTRG.1577.4"; gene_id "chr1:9370627-9374954W"; flanks "9373309^,9373885-"; structure "0,1-2^"; splice_chain ",9373427-9373642^"; sources "Undefined,Undefined"; NMorMRNA "null"; degree "4"; dimension "2_2";
chr1	Undefined	as_event	9373229	9373885	.	+	.	transcript_id "MSTRG.1577.1,MSTRG.1577.4,MSTRG.1577.3"; gene_id "chr1:9370627-9374954W"; flanks "9373229-,9373885-"; structure "1^,1^2-3^,3^"; splice_chain "9373309^,9373309^9373427-9373642^,9373642^"; sources "Undefined,Undefined,Undefined"; NMorMRNA "null"; degree "9"; dimension "3_3";
chr1	Undefined	as_event	9426632	9426822	.	+	.	transcript_id "MSTRG.1585.2,Os01t0272600-01"; gene_id "chr1:9424556-9429189W"; flanks "9426632^,9426822^"; structure "1-,2-"; splice_chain "9426738-,9426751-"; sources "Undefined,Undefined"; NMorMRNA "null"; degree "4"; dimension "2_2";
chr1	Undefined	as_event	9468688	9469747	.	+	.	transcript_id "MSTRG.1595.1/MSTRG.1595.2,MSTRG.1595.4,MSTRG.1595.3"; gene_id "chr1:9464917-9475491W"; flanks "9468688-,9469747-"; structure "1^,2^,3^"; splice_chain "9468817^,9468825^,9468837^"; sources "Undefined,Undefined,Undefined"; NMorMRNA "null"; degree "9"; dimension "3_3";
chr1	Undefined	as_event	9469747	9470017	.	+	.	transcript_id "MSTRG.1595.2,MSTRG.1595.1/MSTRG.1595.3/MSTRG.1595.4"; gene_id "chr1:9464917-9475491W"; flanks "9469747-,9470017-"; structure "1^,2^"; splice_chain "9469899^,9469912^"; sources "Undefined,Undefined"; NMorMRNA "null"; degree "4"; dimension "2_2";
chr1	Undefined	as_event	9472855	9474664	.	+	.	transcript_id "MSTRG.1595.1/MSTRG.1595.2/MSTRG.1595.3/MSTRG.1595.4,Os01t0273500-01"; gene_id "chr1:9464917-9475491W"; flanks "9472855^,9474664^"; structure "1-,2-"; splice_chain "9474394-,9474395-"; sources "Undefined,Undefined"; NMorMRNA "null"; degree "4"; dimension "2_2";
chr1	Undefined	as_event	9625243	9625553	.	+	.	transcript_id "MSTRG.1614.1,Os01t0275300-01"; gene_id "chr1:9625243-9625988W"; flanks "9625243[,9625553-"; structure "1^,2^"; splice_chain "9625418^,9625469^"; sources "Undefined,Undefined"; NMorMRNA "null"; degree "4"; dimension "2_2";
chr1	Undefined	as_event	9648327	9651246	.	+	.	transcript_id "Os01t0275800-01,MSTRG.1620.4"; gene_id "chr1:9644128-9653689W"; flanks "9648327^,9651246^"; structure "1-,2-"; splice_chain "9651072-,9651196-"; sources "Undefined,Undefined"; NMorMRNA "null"; degree "4"; dimension "2_2";
chr1	Undefined	as_event	9644647	9651246	.	+	.	transcript_id "Os01t0275800-01,MSTRG.1620.1"; gene_id "chr1:9644128-9653689W"; flanks "9644647^,9651246^"; structure "1-2^3-,4-"; splice_chain "9648203-9648327^9651072-,9651196-"; sources "Undefined,Undefined"; NMorMRNA "null"; degree "4"; dimension "2_2";
chr1	Undefined	as_event	9874383	9875057	.	+	.	transcript_id "MSTRG.1661.3,MSTRG.1661.4"; gene_id "chr1:9874379-9877252W"; flanks "9874383[,9875057^"; structure "0,1^2-"; splice_chain ",9874893^9874993-"; sources "Undefined,Undefined"; NMorMRNA "null"; degree "4"; dimension "2_2";
chr1	Undefined	as_event	9875577	9875778	.	+	.	transcript_id "MSTRG.1661.1/Os01t0279100-01,MSTRG.1661.3/MSTRG.1661.4"; gene_id "chr1:9874379-9877252W"; flanks "9875577^,9875778^"; structure "1-,2-"; splice_chain "9875680-,9875732-"; sources "Undefined,Undefined"; NMorMRNA "null"; degree "4"; dimension "2_2";
chr1	Undefined	as_event	9929298	9930404	.	+	.	transcript_id "MSTRG.1669.2/Os01t0279900-01,MSTRG.1669.1"; gene_id "chr1:9928851-9936137W"; flanks "9929298^,9930404-"; structure "0,1-2^"; splice_chain ",9929738-9929854^"; sources "Undefined,Undefined"; NMorMRNA "null"; degree "4"; dimension "2_2";
chr1	Undefined	as_event	9930404	9931914	.	+	.	transcript_id "Os01t0279900-01,MSTRG.1669.1/MSTRG.1669.2"; gene_id "chr1:9928851-9936137W"; flanks "9930404-,9931914^"; structure "1^3-,2^4-"; splice_chain "9930562^9931839-,9930563^9931840-"; sources "Undefined,Undefined"; NMorMRNA "null"; degree "4"; dimension "2_2";
chr1	Undefined	as_event	9931995	9934119	.	+	.	transcript_id "MSTRG.1669.4,MSTRG.1669.1/MSTRG.1669.2/Os01t0279900-01"; gene_id "chr1:9928851-9936137W"; flanks "9931995-,9934119^"; structure "0,1^2-"; splice_chain ",9932054^9934042-"; sources "Undefined,Undefined"; NMorMRNA "null"; degree "4"; dimension "2_2";
chr1	Undefined	as_event	9934119	9934252	.	+	.	transcript_id "MSTRG.1669.1/MSTRG.1669.2/Os01t0279900-01,MSTRG.1669.4"; gene_id "chr1:9928851-9936137W"; flanks "9934119^,9934252^"; structure "1-,2-"; splice_chain "9934201-,9934218-"; sources "Undefined,Undefined"; NMorMRNA "null"; degree "4"; dimension "2_2";
chr1	Undefined	as_event	10194933	10195531	.	+	.	transcript_id "MSTRG.1698.1,Os01t0284700-01"; gene_id "chr1:10192969-10196785W"; flanks "10194933-,10195531-"; structure "1^,2^"; splice_chain "10194987^,10195256^"; sources "Undefined,Undefined"; NMorMRNA "null"; degree "4"; dimension "2_2";
chr1	Undefined	as_event	10265240	10265513	.	+	.	transcript_id "MSTRG.1707.1,Os01t0286000-01"; gene_id "chr1:10261618-10267953W"; flanks "10265240^,10265513^"; structure "1-,2-"; splice_chain "10265321-,10265331-"; sources "Undefined,Undefined"; NMorMRNA "null"; degree "4"; dimension "2_2";
chr1	Undefined	as_event	10292606	10292772	.	+	.	transcript_id "MSTRG.1714.3,Os01t0286600-01"; gene_id "chr1:10291889-10295449W"; flanks "10292606^,10292772^"; structure "1-,2-"; splice_chain "10292681-,10292688-"; sources "Undefined,Undefined"; NMorMRNA "null"; degree "4"; dimension "2_2";
chr1	Undefined	as_event	10292421	10292772	.	+	.	transcript_id "MSTRG.1714.1,MSTRG.1714.3,Os01t0286600-01"; gene_id "chr1:10291889-10295449W"; flanks "10292421-,10292772^"; structure "0,1^2-,1^3-"; splice_chain ",10292606^10292681-,10292606^10292688-"; sources "Undefined,Undefined,Undefined"; NMorMRNA "null"; degree "9"; dimension "3_3";
chr1	Undefined	as_event	10292688	10292994	.	+	.	transcript_id "MSTRG.1714.4,Os01t0286600-01"; gene_id "chr1:10291889-10295449W"; flanks "10292688-,10292994^"; structure "0,1^2-"; splice_chain ",10292772^10292847-"; sources "Undefined,Undefined"; NMorMRNA "null"; degree "4"; dimension "2_2";
chr1	Undefined	as_event	10292606	10292994	.	+	.	transcript_id "MSTRG.1714.3,MSTRG.1714.4,Os01t0286600-01"; gene_id "chr1:10291889-10295449W"; flanks "10292606^,10292994^"; structure "1-3^4-,2-,2-3^4-"; splice_chain "10292681-10292772^10292847-,10292688-,10292688-10292772^10292847-"; sources "Undefined,Undefined,Undefined"; NMorMRNA "null"; degree "9"; dimension "3_3";
chr1	Undefined	as_event	10292421	10292994	.	+	.	transcript_id "MSTRG.1714.3,MSTRG.1714.4,Os01t0286600-01,MSTRG.1714.1"; gene_id "chr1:10291889-10295449W"; flanks "10292421-,10292994^"; structure "1^2-4^5-,1^3-,1^3-4^5-,4^5-"; splice_chain "10292606^10292681-10292772^10292847-,10292606^10292688-,10292606^10292688-10292772^10292847-,10292772^10292847-"; sources "Undefined,Undefined,Undefined,Undefined"; NMorMRNA "null"; degree "16"; dimension "4…
chr1	Undefined	as_event	10471033	10471377	.	+	.	transcript_id "MSTRG.1738.1/MSTRG.1738.2,MSTRG.1738.3"; gene_id "chr1:10470456-10479092W"; flanks "10471033^,10471377^"; structure "1-,2-"; splice_chain "10471171-,10471174-"; sources "Undefined,Undefined"; NMorMRNA "null"; degree "4"; dimension "2_2";
chr1	Undefined	as_event	10471377	10473393	.	+	.	transcript_id "MSTRG.1738.2,MSTRG.1738.1/MSTRG.1738.3"; gene_id "chr1:10470456-10479092W"; flanks "10471377^,10473393-"; structure "0,1-2^"; splice_chain ",10472686-10473021^"; sources "Undefined,Undefined"; NMorMRNA "null"; degree "4"; dimension "2_2";
chr1	Undefined	as_event	10515227	10515460	.	+	.	transcript_id "MSTRG.1746.1/MSTRG.1746.2/MSTRG.1746.3,MSTRG.1746.5/Os01t0290650-00"; gene_id "chr1:10513764-10518597W"; flanks "10515227^,10515460^"; structure "1-,2-"; splice_chain "10515323-,10515388-"; sources "Undefined,Undefined"; NMorMRNA "null"; degree "4"; dimension "2_2";
chr1	Undefined	as_event	10515460	10515789	.	+	.	transcript_id "MSTRG.1746.1/MSTRG.1746.2/Os01t0290650-00,MSTRG.1746.3/MSTRG.1746.5"; gene_id "chr1:10513764-10518597W"; flanks "10515460^,10515789^"; structure "1-,2-"; splice_chain "10515695-,10515705-"; sources "Undefined,Undefined"; NMorMRNA "null"; degree "4"; dimension "2_2";
chr1	Undefined	as_event	10625861	10626269	.	+	.	transcript_id "MSTRG.1757.2,Os01t0292200-02"; gene_id "chr1:10622951-10627532W"; flanks "10625861[,10626269^"; structure "0,1^2-"; splice_chain ",10625970^10626063-"; sources "Undefined,Undefined"; NMorMRNA "null"; degree "4"; dimension "2_2";
chr1	Undefined	as_event	10643674	10644047	.	+	.	transcript_id "Os01t0292700-01,MSTRG.1761.5"; gene_id "chr1:10643183-10645284W"; flanks "10643674^,10644047^"; structure "1-,2-"; splice_chain "10643817-,10643820-"; sources "Undefined,Undefined"; NMorMRNA "null"; degree "4"; dimension "2_2";
chr1	Undefined	as_event	10643564	10644047	.	+	.	transcript_id "MSTRG.1761.1/MSTRG.1761.4,Os01t0292700-01,MSTRG.1761.5"; gene_id "chr1:10643183-10645284W"; flanks "10643564-,10644047^"; structure "0,1^2-,1^3-"; splice_chain ",10643674^10643817-,10643674^10643820-"; sources "Undefined,Undefined,Undefined"; NMorMRNA "null"; degree "9"; dimension "3_3";
chr1	Undefined	as_event	10643487	10644047	.	+	.	transcript_id "MSTRG.1761.1/MSTRG.1761.4,Os01t0292700-01,MSTRG.1761.5,MSTRG.1761.2/MSTRG.1761.3"; gene_id "chr1:10643183-10645284W"; flanks "10643487^,10644047^"; structure "1-,1-3^4-,1-3^5-,2-"; splice_chain "10643564-,10643564-10643674^10643817-,10643564-10643674^10643820-,10643567-"; sources "Undefined,Undefined,Undefined,Undefined"; NMorMRNA "null"; degree "16"; dimension "4_4";
chr1	Undefined	as_event	10644470	10645163	.	+	.	transcript_id "MSTRG.1761.5,MSTRG.1761.4"; gene_id "chr1:10643183-10645284W"; flanks "10644470-,10645163]"; structure "0,1^2-"; splice_chain ",10644723^10644801-"; sources "Undefined,Undefined"; NMorMRNA "null"; degree "4"; dimension "2_2";
chr1	Undefined	as_event	10650640	10651656	.	+	.	transcript_id "MSTRG.1763.1/MSTRG.1763.2,MSTRG.1763.3,Os01t0292900-01"; gene_id "chr1:10649484-10656781W"; flanks "10650640^,10651656^"; structure "1-,2-,3-"; splice_chain "10651010-,10651083-,10651095-"; sources "Undefined,Undefined,Undefined"; NMorMRNA "null"; degree "9"; dimension "3_3";
chr1	Undefined	as_event	10653454	10653612	.	+	.	transcript_id "MSTRG.1763.1/MSTRG.1763.3/Os01t0292900-01/Os01t0292900-02,MSTRG.1763.2/MSTRG.1763.6"; gene_id "chr1:10649484-10656781W"; flanks "10653454^,10653612^"; structure "1-,2-"; splice_chain "10653545-,10653548-"; sources "Undefined,Undefined"; NMorMRNA "null"; degree "4"; dimension "2_2";
chr1	Undefined	as_event	10653242	10653612	.	+	.	transcript_id "MSTRG.1763.7,MSTRG.1763.1/MSTRG.1763.3/Os01t0292900-01/Os01t0292900-02,MSTRG.1763.2/MSTRG.1763.6"; gene_id "chr1:10649484-10656781W"; flanks "10653242-,10653612^"; structure "0,1^2-,1^3-"; splice_chain ",10653454^10653545-,10653454^10653548-"; sources "Undefined,Undefined,Undefined"; NMorMRNA "null"; degree "9"; dimension "3_3";
chr1	Undefined	as_event	10654337	10654576	.	+	.	transcript_id "MSTRG.1763.1/MSTRG.1763.2/MSTRG.1763.3/MSTRG.1763.7/Os01t0292900-01/Os01t0292900-02,MSTRG.1763.6"; gene_id "chr1:10649484-10656781W"; flanks "10654337-,10654576-"; structure "1^,2^"; splice_chain "10654454^,10654474^"; sources "Undefined,Undefined"; NMorMRNA "null"; degree "4"; dimension "2_2";
chr1	Undefined	as_event	10654576	10654932	.	+	.	transcript_id "MSTRG.1763.7,MSTRG.1763.1/MSTRG.1763.2/MSTRG.1763.3/MSTRG.1763.6/Os01t0292900-01/Os01t0292900-02"; gene_id "chr1:10649484-10656781W"; flanks "10654576-,10654932^"; structure "0,1^2-"; splice_chain ",10654717^10654791-"; sources "Undefined,Undefined"; NMorMRNA "null"; degree "4"; dimension "2_2";
chr1	Undefined	as_event	10655625	10656659	.	+	.	transcript_id "MSTRG.1763.7,MSTRG.1763.6/Os01t0292900-01"; gene_id "chr1:10649484-10656781W"; flanks "10655625^,10656659]"; structure "1-,2-"; splice_chain "10655729-,10655988-"; sources "Undefined,Undefined"; NMorMRNA "null"; degree "4"; dimension "2_2";
chr1	Undefined	as_event	10654932	10656781	.	+	.	transcript_id "MSTRG.1763.8,MSTRG.1763.1/MSTRG.1763.2"; gene_id "chr1:10649484-10656781W"; flanks "10654932^,10656781]"; structure "1-,2-3^4-"; splice_chain "10654987-,10655008-10655625^10655988-"; sources "Undefined,Undefined"; NMorMRNA "null"; degree "4"; dimension "2_2";
chr1	Undefined	as_event	10824646	10825051	.	+	.	transcript_id "Os01t0296100-02/Os01t0296100-03,Os01t0296100-01"; gene_id "chr1:10822587-10827151W"; flanks "10824646-,10825051^"; structure "0,1^2-"; splice_chain ",10824705^10824779-"; sources "Undefined,Undefined"; NMorMRNA "null"; degree "4"; dimension "2_2";
chr1	Undefined	as_event	10824779	10825227	.	+	.	transcript_id "MSTRG.1776.4,Os01t0296100-01"; gene_id "chr1:10822587-10827151W"; flanks "10824779-,10825227^"; structure "0,1^2-"; splice_chain ",10825051^10825153-"; sources "Undefined,Undefined"; NMorMRNA "null"; degree "4"; dimension "2_2";
chr1	Undefined	as_event	10825975	10826166	.	+	.	transcript_id "MSTRG.1776.4/Os01t0296100-01/Os01t0296100-02,Os01t0296100-03"; gene_id "chr1:10822587-10827151W"; flanks "10825975^,10826166^"; structure "1-,2-"; splice_chain "10826083-,10826117-"; sources "Undefined,Undefined"; NMorMRNA "null"; degree "4"; dimension "2_2";
chr1	Undefined	as_event	10891810	10893684	.	+	.	transcript_id "MSTRG.1783.1,Os01t0297200-01"; gene_id "chr1:10891810-10893684W"; flanks "10891810[,10893684]"; structure "0,1^2-"; splice_chain ",10892529^10892604-"; sources "Undefined,Undefined"; NMorMRNA "null"; degree "4"; dimension "2_2";
chr1	Undefined	as_event	10977311	10977545	.	+	.	transcript_id "Os01t0299400-01,MSTRG.1802.3"; gene_id "chr1:10976500-10980305W"; flanks "10977311^,10977545^"; structure "1-,2-"; splice_chain "10977394-,10977399-"; sources "Undefined,Undefined"; NMorMRNA "null"; degree "4"; dimension "2_2";
chr1	Undefined	as_event	11118778	11119272	.	+	.	transcript_id "Os01t0302000-00,MSTRG.1818.2"; gene_id "chr1:11118689-11119272W"; flanks "11118778^,11119272]"; structure "1-,2-"; splice_chain "11118903-,11118913-"; sources "Undefined,Undefined"; NMorMRNA "null"; degree "4"; dimension "2_2";
chr1	Undefined	as_event	11130706	11131039	.	+	.	transcript_id "MSTRG.1820.3/MSTRG.1820.5,MSTRG.1820.1/Os01t0302100-01"; gene_id "chr1:11129474-11131931W"; flanks "11130706^,11131039^"; structure "1-,2-"; splice_chain "11130943-,11130948-"; sources "Undefined,Undefined"; NMorMRNA "null"; degree "4"; dimension "2_2";
chr1	Undefined	as_event	11130706	11131178	.	+	.	transcript_id "MSTRG.1820.2,MSTRG.1820.3/MSTRG.1820.5,MSTRG.1820.1/Os01t0302100-01"; gene_id "chr1:11129474-11131931W"; flanks "11130706^,11131178-"; structure "0,1-3^,2-3^"; splice_chain ",11130943-11131039^,11130948-11131039^"; sources "Undefined,Undefined,Undefined"; NMorMRNA "null"; degree "9"; dimension "3_3";
chr1	Undefined	as_event	11131178	11131345	.	+	.	transcript_id "Os01t0302100-01,MSTRG.1820.1/MSTRG.1820.2/MSTRG.1820.3/MSTRG.1820.5"; gene_id "chr1:11129474-11131931W"; flanks "11131178-,11131345-"; structure "1^,2^"; splice_chain "11131235^,11131265^"; sources "Undefined,Undefined"; NMorMRNA "null"; degree "4"; dimension "2_2";
chr1	Undefined	as_event	11319711	11320061	.	+	.	transcript_id "MSTRG.1843.1,Os01t0305200-01"; gene_id "chr1:11316565-11320566W"; flanks "11319711-,11320061]"; structure "0,1^2-"; splice_chain ",11319814^11319928-"; sources "Undefined,Undefined"; NMorMRNA "null"; degree "4"; dimension "2_2";
chr1	Undefined	as_event	11412154	11412938	.	+	.	transcript_id "MSTRG.1851.1,Os01t0306800-01"; gene_id "chr1:11412154-11421047W"; flanks "11412154[,11412938^"; structure "0,1^2-"; splice_chain ",11412411^11412832-"; sources "Undefined,Undefined"; NMorMRNA "null"; degree "4"; dimension "2_2";
chr1	Undefined	as_event	11417605	11419685	.	+	.	transcript_id "Os01t0306800-02,MSTRG.1851.1/Os01t0306800-01"; gene_id "chr1:11412154-11421047W"; flanks "11417605-,11419685^"; structure "1^4-,2^3-"; splice_chain "11417751^11419597-,11417846^11419498-"; sources "Undefined,Undefined"; NMorMRNA "null"; degree "4"; dimension "2_2";
chr1	Undefined	as_event	11618787	11619804	.	+	.	transcript_id "MSTRG.1886.2/Os01t0309900-01,MSTRG.1886.3"; gene_id "chr1:11618335-11622522W"; flanks "11618787^,11619804^"; structure "1-,2-"; splice_chain "11619607-,11619730-"; sources "Undefined,Undefined"; NMorMRNA "null"; degree "4"; dimension "2_2";
chr1	Undefined	as_event	11620614	11620905	.	+	.	transcript_id "MSTRG.1886.2/MSTRG.1886.3,Os01t0309900-01"; gene_id "chr1:11618335-11622522W"; flanks "11620614-,11620905^"; structure "0,1^2-"; splice_chain ",11620716^11620787-"; sources "Undefined,Undefined"; NMorMRNA "null"; degree "4"; dimension "2_2";
chr1	Undefined	as_event	11663074	11663923	.	+	.	transcript_id "MSTRG.1891.2/MSTRG.1891.3,MSTRG.1891.4/MSTRG.1891.5/MSTRG.1891.6/MSTRG.1891.7/Os01t0310500-02"; gene_id "chr1:11655138-11666398W"; flanks "11663074^,11663923^"; structure "1-,2-"; splice_chain "11663540-,11663795-"; sources "Undefined,Undefined"; NMorMRNA "null"; degree "4"; dimension "2_2";
chr1	Undefined	as_event	11664356	11664583	.	+	.	transcript_id "MSTRG.1891.2/MSTRG.1891.4/MSTRG.1891.5,MSTRG.1891.3/MSTRG.1891.6"; gene_id "chr1:11655138-11666398W"; flanks "11664356^,11664583^"; structure "1-,2-"; splice_chain "11664433-,11664443-"; sources "Undefined,Undefined"; NMorMRNA "null"; degree "4"; dimension "2_2";
chr1	Undefined	as_event	11664433	11665568	.	+	.	transcript_id "MSTRG.1891.2/MSTRG.1891.5,MSTRG.1891.7"; gene_id "chr1:11655138-11666398W"; flanks "11664433-,11665568-"; structure "1^,2^"; splice_chain "11664583^,11665177^"; sources "Undefined,Undefined"; NMorMRNA "null"; degree "4"; dimension "2_2";
chr1	Undefined	as_event	11664356	11665568	.	+	.	transcript_id "MSTRG.1891.2/MSTRG.1891.5,MSTRG.1891.7,MSTRG.1891.3/MSTRG.1891.6"; gene_id "chr1:11655138-11666398W"; flanks "11664356^,11665568-"; structure "1-3^,1-4^,2-3^"; splice_chain "11664433-11664583^,11664433-11665177^,11664443-11664583^"; sources "Undefined,Undefined,Undefined"; NMorMRNA "null"; degree "9"; dimension "3_3";
chr1	Undefined	as_event	11664583	11665732	.	+	.	transcript_id "MSTRG.1891.4,MSTRG.1891.2/MSTRG.1891.3/MSTRG.1891.5/MSTRG.1891.6"; gene_id "chr1:11655138-11666398W"; flanks "11664583^,11665732^"; structure "1-,2-"; splice_chain "11665097-,11665568-"; sources "Undefined,Undefined"; NMorMRNA "null"; degree "4"; dimension "2_2";
chr1	Undefined	as_event	11664443	11665732	.	+	.	transcript_id "Os01t0310500-02,MSTRG.1891.3/MSTRG.1891.6"; gene_id "chr1:11655138-11666398W"; flanks "11664443-,11665732^"; structure "0,1^2-"; splice_chain ",11664583^11665568-"; sources "Undefined,Undefined"; NMorMRNA "null"; degree "4"; dimension "2_2";
chr1	Undefined	as_event	11664433	11665732	.	+	.	transcript_id "Os01t0310500-01,MSTRG.1891.4,MSTRG.1891.2/MSTRG.1891.5,MSTRG.1891.7"; gene_id "chr1:11655138-11666398W"; flanks "11664433-,11665732^"; structure "0,1^2-,1^4-,3^4-"; splice_chain ",11664583^11665097-,11664583^11665568-,11665177^11665568-"; sources "Undefined,Undefined,Undefined,Undefined"; NMorMRNA "null"; degree "16"; dimension "4_4";
chr1	Undefined	as_event	11664356	11665732	.	+	.	transcript_id "Os01t0310500-01,MSTRG.1891.4,MSTRG.1891.2/MSTRG.1891.5,MSTRG.1891.7,Os01t0310500-02,MSTRG.1891.3/MSTRG.1891.6"; gene_id "chr1:11655138-11666398W"; flanks "11664356^,11665732^"; structure "1-,1-3^4-,1-3^6-,1-5^6-,2-,2-3^6-"; splice_chain "11664433-,11664433-11664583^11665097-,11664433-11664583^11665568-,11664433-11665177^11665568-,11664443-,11664443-11664583^11665568-"; sources "Und…
chr1	Undefined	as_event	11677483	11679033	.	+	.	transcript_id "MSTRG.1896.1/MSTRG.1896.3/Os01t0310800-01,MSTRG.1896.2"; gene_id "chr1:11677483-11685582W"; flanks "11677483[,11679033^"; structure "0,1^2-"; splice_chain ",11678339^11678825-"; sources "Undefined,Undefined"; NMorMRNA "null"; degree "4"; dimension "2_2";
chr1	Undefined	as_event	11680828	11681217	.	+	.	transcript_id "MSTRG.1896.3,MSTRG.1896.1/MSTRG.1896.2"; gene_id "chr1:11677483-11685582W"; flanks "11680828-,11681217-"; structure "1^,2^"; splice_chain "11681010^,11681104^"; sources "Undefined,Undefined"; NMorMRNA "null"; degree "4"; dimension "2_2";
chr1	Undefined	as_event	11680828	11681349	.	+	.	transcript_id "Os01t0310800-01,MSTRG.1896.1/MSTRG.1896.2"; gene_id "chr1:11677483-11685582W"; flanks "11680828-,11681349^"; structure "0,1^2-"; splice_chain ",11681104^11681217-"; sources "Undefined,Undefined"; NMorMRNA "null"; degree "4"; dimension "2_2";
chr1	Undefined	as_event	11680828	11681874	.	+	.	transcript_id "MSTRG.1896.3,Os01t0310800-01"; gene_id "chr1:11677483-11685582W"; flanks "11680828-,11681874]"; structure "1^2-,3^4-"; splice_chain "11681010^11681217-,11681349^11681432-"; sources "Undefined,Undefined"; NMorMRNA "null"; degree "4"; dimension "2_2";
chr1	Undefined	as_event	11694221	11695290	.	+	.	transcript_id "MSTRG.1900.2,Os01t0311500-01"; gene_id "chr1:11693812-11699838W"; flanks "11694221^,11695290-"; structure "0,1-2^"; splice_chain ",11695113-11695151^"; sources "Undefined,Undefined"; NMorMRNA "null"; degree "4"; dimension "2_2";
chr1	Undefined	as_event	11958855	11960309	.	+	.	transcript_id "MSTRG.1928.4,MSTRG.1928.3"; gene_id "chr1:11958825-11964676W"; flanks "11958855[,11960309-"; structure "1^,2^"; splice_chain "11958933^,11959128^"; sources "Undefined,Undefined"; NMorMRNA "null"; degree "4"; dimension "2_2";
chr1	Undefined	as_event	11961977	11962420	.	+	.	transcript_id "MSTRG.1928.2/MSTRG.1928.3/MSTRG.1928.4/Os01t0316600-01,MSTRG.1928.1/MSTRG.1928.5"; gene_id "chr1:11958825-11964676W"; flanks "11961977-,11962420-"; structure "1^,2^"; splice_chain "11962034^,11962257^"; sources "Undefined,Undefined"; NMorMRNA "null"; degree "4"; dimension "2_2";
chr1	Undefined	as_event	11963176	11963616	.	+	.	transcript_id "MSTRG.1928.1/MSTRG.1928.2/MSTRG.1928.5,MSTRG.1928.3"; gene_id "chr1:11958825-11964676W"; flanks "11963176^,11963616^"; structure "1-,2-"; splice_chain "11963441-,11963462-"; sources "Undefined,Undefined"; NMorMRNA "null"; degree "4"; dimension "2_2";
chr1	Undefined	as_event	11963176	11964025	.	+	.	transcript_id "MSTRG.1928.4,MSTRG.1928.1/MSTRG.1928.2/MSTRG.1928.5,MSTRG.1928.3"; gene_id "chr1:11958825-11964676W"; flanks "11963176^,11964025-"; structure "0,1-3^,2-3^"; splice_chain ",11963441-11963616^,11963462-11963616^"; sources "Undefined,Undefined,Undefined"; NMorMRNA "null"; degree "9"; dimension "3_3";
chr1	Undefined	as_event	11963030	11964058	.	+	.	transcript_id "Os01t0316600-01,MSTRG.1928.1/MSTRG.1928.2/MSTRG.1928.5,MSTRG.1928.3,MSTRG.1928.4"; gene_id "chr1:11958825-11964676W"; flanks "11963030-,11964058^"; structure "0,1^2-4^5-,1^3-4^5-,1^5-"; splice_chain ",11963176^11963441-11963616^11964025-,11963176^11963462-11963616^11964025-,11963176^11964025-"; sources "Undefined,Undefined,Undefined,Undefined"; NMorMRNA "null"; degree "16"; dimensi…
chr1	Undefined	as_event	11972778	11974551	.	+	.	transcript_id "MSTRG.1929.4,MSTRG.1929.3"; gene_id "chr1:11970710-11981953W"; flanks "11972778[,11974551-"; structure "1^,2^"; splice_chain "11974442^,11974464^"; sources "Undefined,Undefined"; NMorMRNA "null"; degree "4"; dimension "2_2";
chr1	Undefined	as_event	11978100	11978273	.	+	.	transcript_id "MSTRG.1929.5,MSTRG.1929.1/MSTRG.1929.3/MSTRG.1929.4/MSTRG.1929.7"; gene_id "chr1:11970710-11981953W"; flanks "11978100^,11978273^"; structure "1-,2-"; splice_chain "11978192-,11978211-"; sources "Undefined,Undefined"; NMorMRNA "null"; degree "4"; dimension "2_2";
chr1	Undefined	as_event	11978211	11980083	.	+	.	transcript_id "Os01t0316900-01,MSTRG.1929.1/MSTRG.1929.3/MSTRG.1929.4/MSTRG.1929.7"; gene_id "chr1:11970710-11981953W"; flanks "11978211-,11980083^"; structure "0,1^2-"; splice_chain ",11978273^11979593-"; sources "Undefined,Undefined"; NMorMRNA "null"; degree "4"; dimension "2_2";
chr1	Undefined	as_event	11978100	11980083	.	+	.	transcript_id "MSTRG.1929.5,Os01t0316900-01,MSTRG.1929.1/MSTRG.1929.3/MSTRG.1929.4/MSTRG.1929.7"; gene_id "chr1:11970710-11981953W"; flanks "11978100^,11980083^"; structure "1-3^4-,2-,2-3^4-"; splice_chain "11978192-11978273^11979593-,11978211-,11978211-11978273^11979593-"; sources "Undefined,Undefined,Undefined"; NMorMRNA "null"; degree "9"; dimension "3_3";
chr1	Undefined	as_event	12265165	12265344	.	+	.	transcript_id "Os01t0321800-01,MSTRG.1958.1"; gene_id "chr1:12264911-12269038W"; flanks "12265165-,12265344-"; structure "1^,2^"; splice_chain "12265239^,12265243^"; sources "Undefined,Undefined"; NMorMRNA "null"; degree "4"; dimension "2_2";
chr1	Undefined	as_event	12301627	12302600	.	+	.	transcript_id "MSTRG.1964.2,MSTRG.1964.3"; gene_id "chr1:12301586-12302600W"; flanks "12301627^,12302600]"; structure "1-,2-"; splice_chain "12302319-,12302324-"; sources "Undefined,Undefined"; NMorMRNA "null"; degree "4"; dimension "2_2";
chr1	Undefined	as_event	12345213	12346595	.	+	.	transcript_id "MSTRG.1971.2/MSTRG.1971.3/Os01t0323300-00,MSTRG.1971.4"; gene_id "chr1:12344403-12365491W"; flanks "12345213^,12346595-"; structure "0,1-2^"; splice_chain ",12345989-12346101^"; sources "Undefined,Undefined"; NMorMRNA "null"; degree "4"; dimension "2_2";
chr1	Undefined	as_event	12346722	12347595	.	+	.	transcript_id "MSTRG.1971.3,MSTRG.1971.2/MSTRG.1971.4/MSTRG.1971.6/Os01t0323300-00"; gene_id "chr1:12344403-12365491W"; flanks "12346722^,12347595^"; structure "1-,2-"; splice_chain "12347347-,12347370-"; sources "Undefined,Undefined"; NMorMRNA "null"; degree "4"; dimension "2_2";
chr1	Undefined	as_event	12349759	12350154	.	+	.	transcript_id "MSTRG.1971.2/MSTRG.1971.3/MSTRG.1971.6,MSTRG.1971.4/Os01t0323300-00"; gene_id "chr1:12344403-12365491W"; flanks "12349759-,12350154^"; structure "0,1^2-"; splice_chain ",12349886^12350001-"; sources "Undefined,Undefined"; NMorMRNA "null"; degree "4"; dimension "2_2";
chr1	Undefined	as_event	12394092	12395271	.	+	.	transcript_id "MSTRG.1978.2,MSTRG.1978.1"; gene_id "chr1:12393363-12397511W"; flanks "12394092^,12395271-"; structure "0,1-2^"; splice_chain ",12394217-12395174^"; sources "Undefined,Undefined"; NMorMRNA "null"; degree "4"; dimension "2_2";
chr1	Undefined	as_event	12651737	12653111	.	+	.	transcript_id "MSTRG.2009.1,Os01t0328600-01"; gene_id "chr1:12650573-12654287W"; flanks "12651737-,12653111-"; structure "1^,2^"; splice_chain "12651836^,12652584^"; sources "Undefined,Undefined"; NMorMRNA "null"; degree "4"; dimension "2_2";
chr1	Undefined	as_event	13267280	13268354	.	+	.	transcript_id "MSTRG.2074.1,MSTRG.2074.4/Os01t0337700-02"; gene_id "chr1:13264930-13268354W"; flanks "13267280-,13268354]"; structure "0,1^2-"; splice_chain ",13267387^13267927-"; sources "Undefined,Undefined"; NMorMRNA "null"; degree "4"; dimension "2_2";
chr1	Undefined	as_event	13296843	13297084	.	+	.	transcript_id "MSTRG.2081.2,Os01t0338200-01"; gene_id "chr1:13296370-13305252W"; flanks "13296843-,13297084^"; structure "0,1^2-"; splice_chain ",13296907^13296991-"; sources "Undefined,Undefined"; NMorMRNA "null"; degree "4"; dimension "2_2";
chr1	Undefined	as_event	13302500	13304099	.	+	.	transcript_id "MSTRG.2081.3,MSTRG.2081.2/Os01t0338200-01"; gene_id "chr1:13296370-13305252W"; flanks "13302500-,13304099^"; structure "0,1^2-"; splice_chain ",13302562^13304047-"; sources "Undefined,Undefined"; NMorMRNA "null"; degree "4"; dimension "2_2";
chr1	Undefined	as_event	13453014	13454196	.	+	.	transcript_id "MSTRG.2105.4,MSTRG.2105.5/MSTRG.2105.6"; gene_id "chr1:13452991-13458122W"; flanks "13453014[,13454196^"; structure "0,1^2-3^4-"; splice_chain ",13453850^13453922-13454035^13454146-"; sources "Undefined,Undefined"; NMorMRNA "null"; degree "4"; dimension "2_2";
chr1	Undefined	as_event	13454912	13455247	.	+	.	transcript_id "MSTRG.2105.3,MSTRG.2105.1/MSTRG.2105.2/MSTRG.2105.4/MSTRG.2105.5/MSTRG.2105.7/MSTRG.2105.8"; gene_id "chr1:13452991-13458122W"; flanks "13454912-,13455247-"; structure "1^,2^"; splice_chain "13455152^,13455156^"; sources "Undefined,Undefined"; NMorMRNA "null"; degree "4"; dimension "2_2";
chr1	Undefined	as_event	13455156	13455314	.	+	.	transcript_id "MSTRG.2105.2/MSTRG.2105.7,MSTRG.2105.6"; gene_id "chr1:13452991-13458122W"; flanks "13455156^,13455314^"; structure "1-,2-"; splice_chain "13455247-,13455259-"; sources "Undefined,Undefined"; NMorMRNA "null"; degree "4"; dimension "2_2";
chr1	Undefined	as_event	13454912	13455314	.	+	.	transcript_id "MSTRG.2105.3,MSTRG.2105.2/MSTRG.2105.7,MSTRG.2105.6"; gene_id "chr1:13452991-13458122W"; flanks "13454912-,13455314^"; structure "1^3-,2^3-,2^4-"; splice_chain "13455152^13455247-,13455156^13455247-,13455156^13455259-"; sources "Undefined,Undefined,Undefined"; NMorMRNA "null"; degree "9"; dimension "3_3";
chr1	Undefined	as_event	13455247	13455718	.	+	.	transcript_id "MSTRG.2105.2/MSTRG.2105.3/MSTRG.2105.7,MSTRG.2105.4/MSTRG.2105.8"; gene_id "chr1:13452991-13458122W"; flanks "13455247-,13455718-"; structure "1^,2^"; splice_chain "13455314^,13455540^"; sources "Undefined,Undefined"; NMorMRNA "null"; degree "4"; dimension "2_2";
chr1	Undefined	as_event	13455156	13455718	.	+	.	transcript_id "MSTRG.2105.2/MSTRG.2105.7,MSTRG.2105.4/MSTRG.2105.8,MSTRG.2105.6"; gene_id "chr1:13452991-13458122W"; flanks "13455156^,13455718-"; structure "1-3^,1-4^,2-3^"; splice_chain "13455247-13455314^,13455247-13455540^,13455259-13455314^"; sources "Undefined,Undefined,Undefined"; NMorMRNA "null"; degree "9"; dimension "3_3";
chr1	Undefined	as_event	13454912	13455718	.	+	.	transcript_id "MSTRG.2105.3,MSTRG.2105.2/MSTRG.2105.7,MSTRG.2105.4/MSTRG.2105.8,MSTRG.2105.6"; gene_id "chr1:13452991-13458122W"; flanks "13454912-,13455718-"; structure "1^3-5^,2^3-5^,2^3-6^,2^4-5^"; splice_chain "13455152^13455247-13455314^,13455156^13455247-13455314^,13455156^13455247-13455540^,13455156^13455259-13455314^"; sources "Undefined,Undefined,Undefined,Undefined"; NMorMRNA "null"; de…
chr1	Undefined	as_event	13455247	13455842	.	+	.	transcript_id "MSTRG.2105.5,MSTRG.2105.2,MSTRG.2105.4"; gene_id "chr1:13452991-13458122W"; flanks "13455247-,13455842^"; structure "0,1^3-,2^3-"; splice_chain ",13455314^13455718-,13455540^13455718-"; sources "Undefined,Undefined,Undefined"; NMorMRNA "null"; degree "9"; dimension "3_3";
chr1	Undefined	as_event	13455718	13456007	.	+	.	transcript_id "MSTRG.2105.8,MSTRG.2105.2/MSTRG.2105.4"; gene_id "chr1:13452991-13458122W"; flanks "13455718-,13456007^"; structure "0,1^2-"; splice_chain ",13455842^13455960-"; sources "Undefined,Undefined"; NMorMRNA "null"; degree "4"; dimension "2_2";
chr1	Undefined	as_event	13455247	13456007	.	+	.	transcript_id "MSTRG.2105.1,MSTRG.2105.2,MSTRG.2105.8,MSTRG.2105.4,MSTRG.2105.5"; gene_id "chr1:13452991-13458122W"; flanks "13455247-,13456007^"; structure "0,1^3-4^5-,2^3-,2^3-4^5-,4^5-"; splice_chain ",13455314^13455718-13455842^13455960-,13455540^13455718-,13455540^13455718-13455842^13455960-,13455842^13455960-"; sources "Undefined,Undefined,Undefined,Undefined,Undefined"; NMorMRNA "null"; de…
chr1	Undefined	as_event	13455156	13458117	.	+	.	transcript_id "MSTRG.2105.5,MSTRG.2105.6"; gene_id "chr1:13452991-13458122W"; flanks "13455156^,13458117]"; structure "1-5^6-7^8-,2-3^4-"; splice_chain "13455247-13455842^13455960-13456007^13457720-,13455259-13455314^13455718-"; sources "Undefined,Undefined"; NMorMRNA "null"; degree "4"; dimension "2_2";
chr1	Undefined	as_event	13563049	13563476	.	+	.	transcript_id "Os01t0343200-01,MSTRG.2115.1/MSTRG.2115.3"; gene_id "chr1:13560766-13566871W"; flanks "13563049-,13563476^"; structure "1^3-,2^4-"; splice_chain "13563177^13563288-,13563180^13563291-"; sources "Undefined,Undefined"; NMorMRNA "null"; degree "4"; dimension "2_2";
chr1	Undefined	as_event	13565681	13565906	.	+	.	transcript_id "MSTRG.2115.3,MSTRG.2115.1/Os01t0343200-01"; gene_id "chr1:13560766-13566871W"; flanks "13565681-,13565906-"; structure "1^,2^"; splice_chain "13565786^,13565808^"; sources "Undefined,Undefined"; NMorMRNA "null"; degree "4"; dimension "2_2";
chr1	Undefined	as_event	13565906	13566871	.	+	.	transcript_id "MSTRG.2115.3,MSTRG.2115.1/Os01t0343200-02"; gene_id "chr1:13560766-13566871W"; flanks "13565906-,13566871]"; structure "0,1^2-"; splice_chain ",13566342^13566433-"; sources "Undefined,Undefined"; NMorMRNA "null"; degree "4"; dimension "2_2";
chr1	Undefined	as_event	13570702	13571075	.	+	.	transcript_id "MSTRG.2117.1,Os01t0343300-01"; gene_id "chr1:13570702-13573633W"; flanks "13570702[,13571075^"; structure "0,1^2-"; splice_chain ",13570846^13570977-"; sources "Undefined,Undefined"; NMorMRNA "null"; degree "4"; dimension "2_2";
chr1	Undefined	as_event	13570702	13573633	.	+	.	transcript_id "MSTRG.2117.2,MSTRG.2117.1"; gene_id "chr1:13570702-13573633W"; flanks "13570702[,13573633]"; structure "1^2-,3^4-"; splice_chain "13570846^13570977-,13571075^13572381-"; sources "Undefined,Undefined"; NMorMRNA "null"; degree "4"; dimension "2_2";
chr1	Undefined	as_event	13889766	13890249	.	+	.	transcript_id "MSTRG.2151.2,Os01t0348600-01"; gene_id "chr1:13887272-13893184W"; flanks "13889766-,13890249^"; structure "0,1^2-"; splice_chain ",13890068^13890163-"; sources "Undefined,Undefined"; NMorMRNA "null"; degree "4"; dimension "2_2";
chr1	Undefined	as_event	13935483	13937700	.	+	.	transcript_id "MSTRG.2161.1,MSTRG.2161.2"; gene_id "chr1:13934496-13938321W"; flanks "13935483^,13937700-"; structure "0,1-2^"; splice_chain ",13935669-13935822^"; sources "Undefined,Undefined"; NMorMRNA "null"; degree "4"; dimension "2_2";
chr1	Undefined	as_event	14039915	14040590	.	+	.	transcript_id "MSTRG.2168.1,Os01t0351100-00"; gene_id "chr1:14034615-14041180W"; flanks "14039915^,14040590^"; structure "1-,2-"; splice_chain "14040436-,14040485-"; sources "Undefined,Undefined"; NMorMRNA "null"; degree "4"; dimension "2_2";
chr1	Undefined	as_event	14059603	14064199	.	+	.	transcript_id "MSTRG.2170.1,Os01t0351300-01"; gene_id "chr1:14059603-14064199W"; flanks "14059603[,14064199]"; structure "0,1^2-"; splice_chain ",14062094^14063653-"; sources "Undefined,Undefined"; NMorMRNA "null"; degree "4"; dimension "2_2";
chr1	Undefined	as_event	14102762	14103582	.	+	.	transcript_id "Os01t0352100-01,MSTRG.2179.2"; gene_id "chr1:14101994-14108083W"; flanks "14102762^,14103582^"; structure "1-,2-"; splice_chain "14103258-,14103273-"; sources "Undefined,Undefined"; NMorMRNA "null"; degree "4"; dimension "2_2";
chr1	Undefined	as_event	14197997	14198586	.	+	.	transcript_id "MSTRG.2197.1,MSTRG.2197.2"; gene_id "chr1:14196940-14199552W"; flanks "14197997^,14198586^"; structure "1-,2-"; splice_chain "14198208-,14198427-"; sources "Undefined,Undefined"; NMorMRNA "null"; degree "4"; dimension "2_2";
chr1	Undefined	as_event	14198427	14199047	.	+	.	transcript_id "MSTRG.2197.4,MSTRG.2197.2"; gene_id "chr1:14196940-14199552W"; flanks "14198427-,14199047-"; structure "1^,2^"; splice_chain "14198580^,14198586^"; sources "Undefined,Undefined"; NMorMRNA "null"; degree "4"; dimension "2_2";
chr1	Undefined	as_event	14197997	14199047	.	+	.	transcript_id "MSTRG.2197.1,MSTRG.2197.4,MSTRG.2197.2"; gene_id "chr1:14196940-14199552W"; flanks "14197997^,14199047-"; structure "1-4^,2-3^,2-4^"; splice_chain "14198208-14198586^,14198427-14198580^,14198427-14198586^"; sources "Undefined,Undefined,Undefined"; NMorMRNA "null"; degree "9"; dimension "3_3";
chr1	Undefined	as_event	14196940	14199047	.	+	.	transcript_id "MSTRG.2197.1,MSTRG.2197.2,MSTRG.2197.3"; gene_id "chr1:14196940-14199552W"; flanks "14196940[,14199047-"; structure "1^2-5^,1^3-5^,4^"; splice_chain "14197997^14198208-14198586^,14197997^14198427-14198586^,14198580^"; sources "Undefined,Undefined,Undefined"; NMorMRNA "null"; degree "9"; dimension "3_3";
chr1	Undefined	as_event	14306483	14308769	.	+	.	transcript_id "MSTRG.2211.1,MSTRG.2211.2"; gene_id "chr1:14305716-14316509W"; flanks "14306483-,14308769-"; structure "1^,2^"; splice_chain "14308452^,14308456^"; sources "Undefined,Undefined"; NMorMRNA "null"; degree "4"; dimension "2_2";
chr1	Undefined	as_event	14311754	14312208	.	+	.	transcript_id "MSTRG.2211.1/MSTRG.2211.2/Os01t0355600-01,MSTRG.2211.3"; gene_id "chr1:14305716-14316509W"; flanks "14311754^,14312208^"; structure "1-,2-"; splice_chain "14312011-,14312015-"; sources "Undefined,Undefined"; NMorMRNA "null"; degree "4"; dimension "2_2";
chr1	Undefined	as_event	14315460	14316509	.	+	.	transcript_id "MSTRG.2211.1/MSTRG.2211.2/MSTRG.2211.3/Os01t0355600-01,MSTRG.2211.5"; gene_id "chr1:14305716-14316509W"; flanks "14315460^,14316509]"; structure "1-,2-"; splice_chain "14316061-,14316155-"; sources "Undefined,Undefined"; NMorMRNA "null"; degree "4"; dimension "2_2";
chr1	Undefined	as_event	14471704	14471971	.	+	.	transcript_id "MSTRG.2231.4,MSTRG.2231.7/MSTRG.2231.8"; gene_id "chr1:14471243-14476738W"; flanks "14471704-,14471971-"; structure "1^,2^"; splice_chain "14471883^,14471887^"; sources "Undefined,Undefined"; NMorMRNA "null"; degree "4"; dimension "2_2";
chr1	Undefined	as_event	14471971	14474597	.	+	.	transcript_id "MSTRG.2231.4/MSTRG.2231.8,MSTRG.2231.7"; gene_id "chr1:14471243-14476738W"; flanks "14471971-,14474597^"; structure "0,1^2-"; splice_chain ",14473626^14473796-"; sources "Undefined,Undefined"; NMorMRNA "null"; degree "4"; dimension "2_2";
chr1	Undefined	as_event	14471704	14474597	.	+	.	transcript_id "MSTRG.2231.1/MSTRG.2231.2/MSTRG.2231.6/MSTRG.2231.9/Os01t0357800-01,MSTRG.2231.4,MSTRG.2231.8,MSTRG.2231.7"; gene_id "chr1:14471243-14476738W"; flanks "14471704-,14474597^"; structure "0,1^3-,2^3-,2^3-4^5-"; splice_chain ",14471883^14471971-,14471887^14471971-,14471887^14471971-14473626^14473796-"; sources "Undefined,Undefined,Undefined,Undefined"; NMorMRNA "null"; degree "16"; dim…
chr1	Undefined	as_event	14471348	14474597	.	+	.	transcript_id "MSTRG.2231.1/MSTRG.2231.2/MSTRG.2231.6/MSTRG.2231.9/Os01t0357800-01,MSTRG.2231.4,MSTRG.2231.8,MSTRG.2231.7,MSTRG.2231.5"; gene_id "chr1:14471243-14476738W"; flanks "14471348^,14474597^"; structure "1-,1-3^5-,1-4^5-,1-4^5-6^7-,2-"; splice_chain "14471704-,14471704-14471883^14471971-,14471704-14471887^14471971-,14471704-14471887^14471971-14473626^14473796-,14471712-"; sources "Undefi…
chr1	Undefined	as_event	14475161	14475727	.	+	.	transcript_id "Os01t0357800-01,MSTRG.2231.2/MSTRG.2231.5/MSTRG.2231.6/MSTRG.2231.7/MSTRG.2231.9"; gene_id "chr1:14471243-14476738W"; flanks "14475161^,14475727^"; structure "1-,2-"; splice_chain "14475333-,14475591-"; sources "Undefined,Undefined"; NMorMRNA "null"; degree "4"; dimension "2_2";
chr1	Undefined	as_event	14474993	14475727	.	+	.	transcript_id "MSTRG.2231.1/MSTRG.2231.4/MSTRG.2231.8,Os01t0357800-01,MSTRG.2231.2/MSTRG.2231.5/MSTRG.2231.6/MSTRG.2231.7/MSTRG.2231.9"; gene_id "chr1:14471243-14476738W"; flanks "14474993-,14475727^"; structure "0,1^2-,1^3-"; splice_chain ",14475161^14475333-,14475161^14475591-"; sources "Undefined,Undefined,Undefined"; NMorMRNA "null"; degree "9"; dimension "3_3";
chr1	Undefined	as_event	14476292	14476738	.	+	.	transcript_id "MSTRG.2231.6,MSTRG.2231.1/MSTRG.2231.5/MSTRG.2231.8/MSTRG.2231.9/Os01t0357800-01"; gene_id "chr1:14471243-14476738W"; flanks "14476292^,14476738]"; structure "1-,2-"; splice_chain "14476378-,14476391-"; sources "Undefined,Undefined"; NMorMRNA "null"; degree "4"; dimension "2_2";
chr1	Undefined	as_event	14476080	14476738	.	+	.	transcript_id "MSTRG.2231.2/MSTRG.2231.4/MSTRG.2231.7,MSTRG.2231.6,MSTRG.2231.1/MSTRG.2231.5/MSTRG.2231.8/MSTRG.2231.9/Os01t0357800-01"; gene_id "chr1:14471243-14476738W"; flanks "14476080-,14476738]"; structure "0,1^2-,1^3-"; splice_chain ",14476292^14476378-,14476292^14476391-"; sources "Undefined,Undefined,Undefined"; NMorMRNA "null"; degree "9"; dimension "3_3";
chr1	Undefined	as_event	14799828	14800197	.	+	.	transcript_id "MSTRG.2275.18/Os01t0363500-03,MSTRG.2275.4/Os01t0363500-01/Os01t0363500-04"; gene_id "chr1:14798822-14803608W"; flanks "14799828^,14800197^"; structure "1-,2-"; splice_chain "14799902-,14799921-"; sources "Undefined,Undefined"; NMorMRNA "null"; degree "4"; dimension "2_2";
chr1	Undefined	as_event	14798988	14800197	.	+	.	transcript_id "MSTRG.2275.16,MSTRG.2275.14/MSTRG.2275.17,MSTRG.2275.18"; gene_id "chr1:14798822-14803608W"; flanks "14798988[,14800197^"; structure "0,1^3-,2^4-"; splice_chain ",14799346^14799829-,14799828^14799902-"; sources "Undefined,Undefined,Undefined"; NMorMRNA "null"; degree "9"; dimension "3_3";
chr1	Undefined	as_event	14798871	14800197	.	+	.	transcript_id "MSTRG.2275.6,MSTRG.2275.4/Os01t0363500-04"; gene_id "chr1:14798822-14803608W"; flanks "14798871[,14800197^"; structure "0,1^2-"; splice_chain ",14799828^14799921-"; sources "Undefined,Undefined"; NMorMRNA "null"; degree "4"; dimension "2_2";
chr1	Undefined	as_event	14799921	14800350	.	+	.	transcript_id "MSTRG.2275.11/MSTRG.2275.8,Os01t0363500-01/Os01t0363500-04"; gene_id "chr1:14798822-14803608W"; flanks "14799921-,14800350-"; structure "1^,2^"; splice_chain "14800146^,14800197^"; sources "Undefined,Undefined"; NMorMRNA "null"; degree "4"; dimension "2_2";
chr1	Undefined	as_event	14799829	14800350	.	+	.	transcript_id "MSTRG.2275.15,MSTRG.2275.17/Os01t0363500-02"; gene_id "chr1:14798822-14803608W"; flanks "14799829-,14800350-"; structure "1^,2^"; splice_chain "14800146^,14800197^"; sources "Undefined,Undefined"; NMorMRNA "null"; degree "4"; dimension "2_2";
chr1	Undefined	as_event	14799828	14800350	.	+	.	transcript_id "Os01t0363500-03,MSTRG.2275.11/MSTRG.2275.8,Os01t0363500-01/Os01t0363500-04"; gene_id "chr1:14798822-14803608W"; flanks "14799828^,14800350-"; structure "1-4^,2-3^,2-4^"; splice_chain "14799902-14800197^,14799921-14800146^,14799921-14800197^"; sources "Undefined,Undefined,Undefined"; NMorMRNA "null"; degree "9"; dimension "3_3";
chr1	Undefined	as_event	14799346	14800350	.	+	.	transcript_id "MSTRG.2275.19/Os01t0363500-05,MSTRG.2275.15,MSTRG.2275.17/Os01t0363500-02"; gene_id "chr1:14798822-14803608W"; flanks "14799346^,14800350-"; structure "0,1-2^,1-3^"; splice_chain ",14799829-14800146^,14799829-14800197^"; sources "Undefined,Undefined,Undefined"; NMorMRNA "null"; degree "9"; dimension "3_3";
chr1	Undefined	as_event	14798988	14800350	.	+	.	transcript_id "MSTRG.2275.19/Os01t0363500-05,MSTRG.2275.15,MSTRG.2275.17,MSTRG.2275.16"; gene_id "chr1:14798822-14803608W"; flanks "14798988[,14800350-"; structure "1^,1^2-3^,1^2-4^,4^"; splice_chain "14799346^,14799346^14799829-14800146^,14799346^14799829-14800197^,14800197^"; sources "Undefined,Undefined,Undefined,Undefined"; NMorMRNA "null"; degree "16"; dimension "4_4";
chr1	Undefined	as_event	14798871	14800350	.	+	.	transcript_id "MSTRG.2275.8,Os01t0363500-04,MSTRG.2275.6"; gene_id "chr1:14798822-14803608W"; flanks "14798871[,14800350-"; structure "1^2-3^,1^2-4^,4^"; splice_chain "14799828^14799921-14800146^,14799828^14799921-14800197^,14800197^"; sources "Undefined,Undefined,Undefined"; NMorMRNA "null"; degree "9"; dimension "3_3";
chr1	Undefined	as_event	14799921	14800415	.	+	.	transcript_id "MSTRG.2275.13,MSTRG.2275.8,Os01t0363500-01"; gene_id "chr1:14798822-14803608W"; flanks "14799921-,14800415^"; structure "0,1^3-,2^3-"; splice_chain ",14800146^14800350-,14800197^14800350-"; sources "Undefined,Undefined,Undefined"; NMorMRNA "null"; degree "9"; dimension "3_3";
chr1	Undefined	as_event	14798988	14800415	.	+	.	transcript_id "MSTRG.2275.15,MSTRG.2275.19,MSTRG.2275.13"; gene_id "chr1:14798822-14803608W"; flanks "14798988[,14800415^"; structure "1^3-5^6-,1^6-,2^4-"; splice_chain "14799346^14799829-14800146^14800350-,14799346^14800350-,14799828^14799921-"; sources "Undefined,Undefined,Undefined"; NMorMRNA "null"; degree "9"; dimension "3_3";
chr1	Undefined	as_event	14798871	14800415	.	+	.	transcript_id "MSTRG.2275.5,MSTRG.2275.8,MSTRG.2275.6"; gene_id "chr1:14798822-14803608W"; flanks "14798871[,14800415^"; structure "0,1^2-3^5-,4^5-"; splice_chain ",14799828^14799921-14800146^14800350-,14800197^14800350-"; sources "Undefined,Undefined,Undefined"; NMorMRNA "null"; degree "9"; dimension "3_3";
chr1	Undefined	as_event	14799921	14800458	.	+	.	transcript_id "MSTRG.2275.12,MSTRG.2275.4"; gene_id "chr1:14798822-14803608W"; flanks "14799921-,14800458-"; structure "1^,2^"; splice_chain "14800146^,14800197^"; sources "Undefined,Undefined"; NMorMRNA "null"; degree "4"; dimension "2_2";
chr1	Undefined	as_event	14799828	14800458	.	+	.	transcript_id "MSTRG.2275.18,MSTRG.2275.12,MSTRG.2275.4"; gene_id "chr1:14798822-14803608W"; flanks "14799828^,14800458-"; structure "1-4^,2-3^,2-4^"; splice_chain "14799902-14800197^,14799921-14800146^,14799921-14800197^"; sources "Undefined,Undefined,Undefined"; NMorMRNA "null"; degree "9"; dimension "3_3";
chr1	Undefined	as_event	14799346	14800458	.	+	.	transcript_id "MSTRG.2275.7,MSTRG.2275.14"; gene_id "chr1:14798822-14803608W"; flanks "14799346^,14800458-"; structure "0,1-2^"; splice_chain ",14799829-14800197^"; sources "Undefined,Undefined"; NMorMRNA "null"; degree "4"; dimension "2_2";
chr1	Undefined	as_event	14798871	14800458	.	+	.	transcript_id "MSTRG.2275.7,MSTRG.2275.4"; gene_id "chr1:14798822-14803608W"; flanks "14798871[,14800458-"; structure "1^,2^3-4^"; splice_chain "14799346^,14799828^14799921-14800197^"; sources "Undefined,Undefined"; NMorMRNA "null"; degree "4"; dimension "2_2";
chr1	Undefined	as_event	14800350	14800555	.	+	.	transcript_id "MSTRG.2275.11/MSTRG.2275.16/MSTRG.2275.17/Os01t0363500-03/Os01t0363500-04/Os01t0363500-05,Os01t0363500-02"; gene_id "chr1:14798822-14803608W"; flanks "14800350-,14800555^"; structure "0,1^2-"; splice_chain ",14800415^14800506-"; sources "Undefined,Undefined"; NMorMRNA "null"; degree "4"; dimension "2_2";
chr1	Undefined	as_event	14800197	14800555	.	+	.	transcript_id "MSTRG.2275.16/MSTRG.2275.17/Os01t0363500-03/Os01t0363500-04,Os01t0363500-02,MSTRG.2275.14/MSTRG.2275.18/MSTRG.2275.4"; gene_id "chr1:14798822-14803608W"; flanks "14800197^,14800555^"; structure "1-,1-2^4-,3-"; splice_chain "14800350-,14800350-14800415^14800506-,14800458-"; sources "Undefined,Undefined,Undefined"; NMorMRNA "null"; degree "9"; dimension "3_3";
chr1	Undefined	as_event	14800146	14800555	.	+	.	transcript_id "MSTRG.2275.11,MSTRG.2275.12"; gene_id "chr1:14798822-14803608W"; flanks "14800146^,14800555^"; structure "1-,2-"; splice_chain "14800350-,14800458-"; sources "Undefined,Undefined"; NMorMRNA "null"; degree "4"; dimension "2_2";
chr1	Undefined	as_event	14799921	14800555	.	+	.	transcript_id "MSTRG.2275.11,MSTRG.2275.12,Os01t0363500-04,MSTRG.2275.4"; gene_id "chr1:14798822-14803608W"; flanks "14799921-,14800555^"; structure "1^3-,1^4-,2^3-,2^4-"; splice_chain "14800146^14800350-,14800146^14800458-,14800197^14800350-,14800197^14800458-"; sources "Undefined,Undefined,Undefined,Undefined"; NMorMRNA "null"; degree "16"; dimension "4_4";
chr1	Undefined	as_event	14799902	14800555	.	+	.	transcript_id "MSTRG.2275.9,Os01t0363500-03,MSTRG.2275.18"; gene_id "chr1:14798822-14803608W"; flanks "14799902-,14800555^"; structure "0,1^2-,1^3-"; splice_chain ",14800197^14800350-,14800197^14800458-"; sources "Undefined,Undefined,Undefined"; NMorMRNA "null"; degree "9"; dimension "3_3";
chr1	Undefined	as_event	14799828	14800555	.	+	.	transcript_id "MSTRG.2275.9,Os01t0363500-03,MSTRG.2275.18,MSTRG.2275.11,MSTRG.2275.12,Os01t0363500-04,MSTRG.2275.4"; gene_id "chr1:14798822-14803608W"; flanks "14799828^,14800555^"; structure "1-,1-4^5-,1-4^6-,2-3^5-,2-3^6-,2-4^5-,2-4^6-"; splice_chain "14799902-,14799902-14800197^14800350-,14799902-14800197^14800458-,14799921-14800146^14800350-,14799921-14800146^14800458-,14799921-14800197^14800…
chr1	Undefined	as_event	14799346	14800555	.	+	.	transcript_id "MSTRG.2275.17,Os01t0363500-02,MSTRG.2275.14,Os01t0363500-05,MSTRG.2275.7"; gene_id "chr1:14798822-14803608W"; flanks "14799346^,14800555^"; structure "1-2^3-,1-2^3-4^6-,1-2^5-,3-,5-"; splice_chain "14799829-14800197^14800350-,14799829-14800197^14800350-14800415^14800506-,14799829-14800197^14800458-,14800350-,14800458-"; sources "Undefined,Undefined,Undefined,Undefined,Undefined"; N…
chr1	Undefined	as_event	14798988	14800555	.	+	.	transcript_id "MSTRG.2275.17,MSTRG.2275.14,Os01t0363500-05,MSTRG.2275.18,MSTRG.2275.16"; gene_id "chr1:14798822-14803608W"; flanks "14798988[,14800555^"; structure "1^3-5^6-,1^3-5^7-,1^6-,2^4-5^7-,5^6-"; splice_chain "14799346^14799829-14800197^14800350-,14799346^14799829-14800197^14800458-,14799346^14800350-,14799828^14799902-14800197^14800458-,14800197^14800350-"; sources "Undefined,Undefined,U…
chr1	Undefined	as_event	14798871	14800555	.	+	.	transcript_id "MSTRG.2275.7,MSTRG.2275.9,Os01t0363500-04,MSTRG.2275.4"; gene_id "chr1:14798822-14803608W"; flanks "14798871[,14800555^"; structure "1^7-,2^3-,2^4-5^6-,2^4-5^7-"; splice_chain "14799346^14800458-,14799828^14799902-,14799828^14799921-14800197^14800350-,14799828^14799921-14800197^14800458-"; sources "Undefined,Undefined,Undefined,Undefined"; NMorMRNA "null"; degree "16"; dimension "4…
chr1	Undefined	as_event	14800415	14800812	.	+	.	transcript_id "MSTRG.2275.13/MSTRG.2275.15/MSTRG.2275.19/MSTRG.2275.5/MSTRG.2275.6/MSTRG.2275.8/Os01t0363500-01,Os01t0363500-02"; gene_id "chr1:14798822-14803608W"; flanks "14800415^,14800812-"; structure "0,1-2^"; splice_chain ",14800506-14800555^"; sources "Undefined,Undefined"; NMorMRNA "null"; degree "4"; dimension "2_2";
chr1	Undefined	as_event	14800350	14800812	.	+	.	transcript_id "MSTRG.2275.15/MSTRG.2275.19/MSTRG.2275.6/MSTRG.2275.8/Os01t0363500-01,Os01t0363500-02,MSTRG.2275.11/MSTRG.2275.16/MSTRG.2275.17/Os01t0363500-03/Os01t0363500-04/Os01t0363500-05"; gene_id "chr1:14798822-14803608W"; flanks "14800350-,14800812-"; structure "1^,1^2-3^,3^"; splice_chain "14800415^,14800415^14800506-14800555^,14800555^"; sources "Undefined,Undefined,Undefined"; NMorMRNA "…
chr1	Undefined	as_event	14800197	14800812	.	+	.	transcript_id "MSTRG.2275.6/Os01t0363500-01,Os01t0363500-02,MSTRG.2275.16/MSTRG.2275.17/Os01t0363500-03/Os01t0363500-04,MSTRG.2275.14/MSTRG.2275.18/MSTRG.2275.4"; gene_id "chr1:14798822-14803608W"; flanks "14800197^,14800812-"; structure "1-2^,1-2^4-5^,1-5^,3-5^"; splice_chain "14800350-14800415^,14800350-14800415^14800506-14800555^,14800350-14800555^,14800458-14800555^"; sources "Undefined,Undef…
chr1	Undefined	as_event	14800146	14800812	.	+	.	transcript_id "MSTRG.2275.15/MSTRG.2275.8,MSTRG.2275.11,MSTRG.2275.12"; gene_id "chr1:14798822-14803608W"; flanks "14800146^,14800812-"; structure "1-2^,1-4^,3-4^"; splice_chain "14800350-14800415^,14800350-14800555^,14800458-14800555^"; sources "Undefined,Undefined,Undefined"; NMorMRNA "null"; degree "9"; dimension "3_3";
chr1	Undefined	as_event	14799921	14800812	.	+	.	transcript_id "MSTRG.2275.8,MSTRG.2275.11,MSTRG.2275.12,Os01t0363500-01,Os01t0363500-04,MSTRG.2275.4,MSTRG.2275.13"; gene_id "chr1:14798822-14803608W"; flanks "14799921-,14800812-"; structure "1^3-4^,1^3-6^,1^5-6^,2^3-4^,2^3-6^,2^5-6^,4^"; splice_chain "14800146^14800350-14800415^,14800146^14800350-14800555^,14800146^14800458-14800555^,14800197^14800350-14800415^,14800197^14800350-14800555^,14800…
chr1	Undefined	as_event	14799829	14800812	.	+	.	transcript_id "MSTRG.2275.15,Os01t0363500-02,MSTRG.2275.17,MSTRG.2275.14"; gene_id "chr1:14798822-14803608W"; flanks "14799829-,14800812-"; structure "1^3-4^,2^3-4^6-7^,2^3-7^,2^5-7^"; splice_chain "14800146^14800350-14800415^,14800197^14800350-14800415^14800506-14800555^,14800197^14800350-14800555^,14800197^14800458-14800555^"; sources "Undefined,Undefined,Undefined,Undefined"; NMorMRNA "null"; …
chr1	Undefined	as_event	14799828	14800812	.	+	.	transcript_id "Os01t0363500-03,MSTRG.2275.18,MSTRG.2275.9,MSTRG.2275.8,MSTRG.2275.11,MSTRG.2275.12,Os01t0363500-01,Os01t0363500-04,MSTRG.2275.4,MSTRG.2275.13"; gene_id "chr1:14798822-14803608W"; flanks "14799828^,14800812-"; structure "1-4^5-8^,1-4^7-8^,1-8^,2-3^5-6^,2-3^5-8^,2-3^7-8^,2-4^5-6^,2-4^5-8^,2-4^7-8^,2-6^"; splice_chain "14799902-14800197^14800350-14800555^,14799902-14800197^14800458-1…
chr1	Undefined	as_event	14799346	14800812	.	+	.	transcript_id "MSTRG.2275.15,Os01t0363500-02,MSTRG.2275.17,MSTRG.2275.14,MSTRG.2275.19,Os01t0363500-05,MSTRG.2275.7"; gene_id "chr1:14798822-14803608W"; flanks "14799346^,14800812-"; structure "1-2^4-5^,1-3^4-5^7-8^,1-3^4-8^,1-3^6-8^,4-5^,4-8^,6-8^"; splice_chain "14799829-14800146^14800350-14800415^,14799829-14800197^14800350-14800415^14800506-14800555^,14799829-14800197^14800350-14800555^,14799…
chr1	Undefined	as_event	14798988	14800812	.	+	.	transcript_id "MSTRG.2275.15,MSTRG.2275.17,MSTRG.2275.14,MSTRG.2275.19,Os01t0363500-05,MSTRG.2275.18,MSTRG.2275.13,MSTRG.2275.16"; gene_id "chr1:14798822-14803608W"; flanks "14798988[,14800812-"; structure "1^3-6^8-9^,1^3-7^8-11^,1^3-7^10-11^,1^8-9^,1^8-11^,2^4-7^10-11^,2^5-9^,7^8-11^"; splice_chain "14799346^14799829-14800146^14800350-14800415^,14799346^14799829-14800197^14800350-14800555^,14799…
chr1	Undefined	as_event	14798871	14800812	.	+	.	transcript_id "MSTRG.2275.7,MSTRG.2275.9,MSTRG.2275.8,Os01t0363500-04,MSTRG.2275.4,MSTRG.2275.6,MSTRG.2275.5"; gene_id "chr1:14798822-14803608W"; flanks "14798871[,14800812-"; structure "1^9-10^,2^3-10^,2^4-5^7-8^,2^4-6^7-10^,2^4-6^9-10^,6^7-8^,8^"; splice_chain "14799346^14800458-14800555^,14799828^14799902-14800555^,14799828^14799921-14800146^14800350-14800415^,14799828^14799921-14800197^148003…
chr1	Undefined	as_event	14800812	14801923	.	+	.	transcript_id "MSTRG.2275.16/MSTRG.2275.17/MSTRG.2275.5,MSTRG.2275.13/MSTRG.2275.15/Os01t0363500-05"; gene_id "chr1:14798822-14803608W"; flanks "14800812-,14801923]"; structure "0,1^2-"; splice_chain ",14801006^14801534-"; sources "Undefined,Undefined"; NMorMRNA "null"; degree "4"; dimension "2_2";
chr1	Undefined	as_event	14800812	14801946	.	+	.	transcript_id "MSTRG.2275.11/MSTRG.2275.4,MSTRG.2275.7/Os01t0363500-01"; gene_id "chr1:14798822-14803608W"; flanks "14800812-,14801946]"; structure "0,1^2-"; splice_chain ",14801006^14801534-"; sources "Undefined,Undefined"; NMorMRNA "null"; degree "4"; dimension "2_2";
chr1	Undefined	as_event	14810070	14810780	.	+	.	transcript_id "MSTRG.2277.3/Os01t0363900-01,MSTRG.2277.2"; gene_id "chr1:14809676-14822149W"; flanks "14810070^,14810780-"; structure "0,1-2^"; splice_chain ",14810406-14810513^"; sources "Undefined,Undefined"; NMorMRNA "null"; degree "4"; dimension "2_2";
chr1	Undefined	as_event	14813632	14813990	.	+	.	transcript_id "MSTRG.2277.2/MSTRG.2277.5/Os01t0363900-01,MSTRG.2277.4"; gene_id "chr1:14809676-14822149W"; flanks "14813632^,14813990^"; structure "1-,2-"; splice_chain "14813715-,14813765-"; sources "Undefined,Undefined"; NMorMRNA "null"; degree "4"; dimension "2_2";
chr1	Undefined	as_event	14813570	14813990	.	+	.	transcript_id "MSTRG.2277.3,MSTRG.2277.2/MSTRG.2277.5/Os01t0363900-01,MSTRG.2277.4"; gene_id "chr1:14809676-14822149W"; flanks "14813570-,14813990^"; structure "0,1^2-,1^3-"; splice_chain ",14813632^14813715-,14813632^14813765-"; sources "Undefined,Undefined,Undefined"; NMorMRNA "null"; degree "9"; dimension "3_3";
chr1	Undefined	as_event	14821110	14821703	.	+	.	transcript_id "MSTRG.2277.2/MSTRG.2277.4/Os01t0363900-01,MSTRG.2277.3/MSTRG.2277.5"; gene_id "chr1:14809676-14822149W"; flanks "14821110-,14821703-"; structure "1^,2^"; splice_chain "14821293^,14821321^"; sources "Undefined,Undefined"; NMorMRNA "null"; degree "4"; dimension "2_2";
chr1	Undefined	as_event	14889567	14893755	.	+	.	transcript_id "MSTRG.2289.2,MSTRG.2289.1"; gene_id "chr1:14889324-14899309W"; flanks "14889567^,14893755^"; structure "1-,2-"; splice_chain "14892827-,14892832-"; sources "Undefined,Undefined"; NMorMRNA "null"; degree "4"; dimension "2_2";
chr1	Undefined	as_event	14955728	14957275	.	+	.	transcript_id "MSTRG.2300.3,MSTRG.2300.1/MSTRG.2300.2/MSTRG.2300.4"; gene_id "chr1:14955728-14959437W"; flanks "14955728[,14957275-"; structure "1^,2^"; splice_chain "14956003^,14956020^"; sources "Undefined,Undefined"; NMorMRNA "null"; degree "4"; dimension "2_2";
chr1	Undefined	as_event	14957275	14957473	.	+	.	transcript_id "MSTRG.2300.4,MSTRG.2300.1/MSTRG.2300.2"; gene_id "chr1:14955728-14959437W"; flanks "14957275-,14957473-"; structure "1^,2^"; splice_chain "14957328^,14957356^"; sources "Undefined,Undefined"; NMorMRNA "null"; degree "4"; dimension "2_2";
chr1	Undefined	as_event	14957275	14957530	.	+	.	transcript_id "MSTRG.2300.3,MSTRG.2300.4,MSTRG.2300.2"; gene_id "chr1:14955728-14959437W"; flanks "14957275-,14957530^"; structure "0,1^3-,2^3-"; splice_chain ",14957328^14957473-,14957356^14957473-"; sources "Undefined,Undefined,Undefined"; NMorMRNA "null"; degree "9"; dimension "3_3";
chr1	Undefined	as_event	14955728	14959343	.	+	.	transcript_id "Os01t0366100-01,MSTRG.2300.3,MSTRG.2300.4"; gene_id "chr1:14955728-14959437W"; flanks "14955728[,14959343]"; structure "0,1^3-6^7-,2^3-4^5-6^7-"; splice_chain ",14956003^14957275-14957530^14957791-,14956020^14957275-14957328^14957473-14957530^14957791-"; sources "Undefined,Undefined,Undefined"; NMorMRNA "null"; degree "9"; dimension "3_3";
chr1	Undefined	as_event	14957473	14959437	.	+	.	transcript_id "MSTRG.2300.1,MSTRG.2300.2"; gene_id "chr1:14955728-14959437W"; flanks "14957473-,14959437]"; structure "0,1^2-3^4-"; splice_chain ",14957530^14957791-14957836^14959102-"; sources "Undefined,Undefined"; NMorMRNA "null"; degree "4"; dimension "2_2";
chr1	Undefined	as_event	14964576	14965661	.	+	.	transcript_id "MSTRG.2303.2,MSTRG.2303.3"; gene_id "chr1:14964573-14968307W"; flanks "14964576[,14965661^"; structure "0,1^2-"; splice_chain ",14965455^14965560-"; sources "Undefined,Undefined"; NMorMRNA "null"; degree "4"; dimension "2_2";
chr1	Undefined	as_event	14965961	14966565	.	+	.	transcript_id "MSTRG.2303.2/Os01t0366300-01,MSTRG.2303.3"; gene_id "chr1:14964573-14968307W"; flanks "14965961^,14966565-"; structure "0,1-2^"; splice_chain ",14966381-14966486^"; sources "Undefined,Undefined"; NMorMRNA "null"; degree "4"; dimension "2_2";
chr1	Undefined	as_event	15059930	15060340	.	+	.	transcript_id "Os01t0367700-01,MSTRG.2314.2"; gene_id "chr1:15059450-15067522W"; flanks "15059930^,15060340^"; structure "1-,2-"; splice_chain "15060056-,15060060-"; sources "Undefined,Undefined"; NMorMRNA "null"; degree "4"; dimension "2_2";
chr1	Undefined	as_event	15066109	15067522	.	+	.	transcript_id "MSTRG.2314.2/Os01t0367700-01,MSTRG.2314.3"; gene_id "chr1:15059450-15067522W"; flanks "15066109^,15067522]"; structure "1-,2-"; splice_chain "15066893-,15066896-"; sources "Undefined,Undefined"; NMorMRNA "null"; degree "4"; dimension "2_2";
chr1	Undefined	as_event	15163079	15164670	.	+	.	transcript_id "Os01t0369600-01,MSTRG.2327.1,MSTRG.2327.3"; gene_id "chr1:15160442-15165714W"; flanks "15163079-,15164670^"; structure "0,1^3-,2^4-"; splice_chain ",15163112^15163184-,15163130^15164601-"; sources "Undefined,Undefined,Undefined"; NMorMRNA "null"; degree "9"; dimension "3_3";
chr1	Undefined	as_event	15165276	15165714	.	+	.	transcript_id "MSTRG.2327.3,MSTRG.2327.1/Os01t0369600-01"; gene_id "chr1:15160442-15165714W"; flanks "15165276-,15165714]"; structure "0,1^2-"; splice_chain ",15165314^15165518-"; sources "Undefined,Undefined"; NMorMRNA "null"; degree "4"; dimension "2_2";
chr1	Undefined	as_event	15542384	15543519	.	+	.	transcript_id "MSTRG.2384.3,MSTRG.2384.4"; gene_id "chr1:15541500-15544188W"; flanks "15542384^,15543519-"; structure "0,1-2^"; splice_chain ",15542992-15543090^"; sources "Undefined,Undefined"; NMorMRNA "null"; degree "4"; dimension "2_2";
chr1	Undefined	as_event	15747817	15752080	.	+	.	transcript_id "MSTRG.2403.1,MSTRG.2403.2"; gene_id "chr1:15747817-15752440W"; flanks "15747817[,15752080-"; structure "1^3-4^,2^"; splice_chain "15747926^15749749-15750256^,15748435^"; sources "Undefined,Undefined"; NMorMRNA "null"; degree "4"; dimension "2_2";
chr1	Undefined	as_event	15777671	15780024	.	+	.	transcript_id "MSTRG.2406.5,MSTRG.2406.2,Os01t0379400-01"; gene_id "chr1:15777377-15781070W"; flanks "15777671^,15780024]"; structure "1-,2-,3-"; splice_chain "15778564-,15778655-,15778676-"; sources "Undefined,Undefined,Undefined"; NMorMRNA "null"; degree "9"; dimension "3_3";
chr1	Undefined	as_event	15777377	15780024	.	+	.	transcript_id "MSTRG.2406.1,MSTRG.2406.2,Os01t0379400-01"; gene_id "chr1:15777377-15781070W"; flanks "15777377[,15780024]"; structure "0,1^2-,1^3-"; splice_chain ",15777671^15778655-,15777671^15778676-"; sources "Undefined,Undefined,Undefined"; NMorMRNA "null"; degree "9"; dimension "3_3";
chr1	Undefined	as_event	15777671	15780175	.	+	.	transcript_id "MSTRG.2406.3,MSTRG.2406.6"; gene_id "chr1:15777377-15781070W"; flanks "15777671^,15780175^"; structure "1-,2-"; splice_chain "15778676-,15778683-"; sources "Undefined,Undefined"; NMorMRNA "null"; degree "4"; dimension "2_2";
chr1	Undefined	as_event	15778676	15780653	.	+	.	transcript_id "MSTRG.2406.3,Os01t0379400-03"; gene_id "chr1:15777377-15781070W"; flanks "15778676-,15780653-"; structure "1^,2^"; splice_chain "15780175^,15780180^"; sources "Undefined,Undefined"; NMorMRNA "null"; degree "4"; dimension "2_2";
chr1	Undefined	as_event	15777671	15780653	.	+	.	transcript_id "MSTRG.2406.3,Os01t0379400-03,MSTRG.2406.6"; gene_id "chr1:15777377-15781070W"; flanks "15777671^,15780653-"; structure "1-3^,1-4^,2-3^"; splice_chain "15778676-15780175^,15778676-15780180^,15778683-15780175^"; sources "Undefined,Undefined,Undefined"; NMorMRNA "null"; degree "9"; dimension "3_3";
chr1	Undefined	as_event	15975356	15976112	.	+	.	transcript_id "MSTRG.2423.2/MSTRG.2423.3,Os01t0382700-02"; gene_id "chr1:15975326-15980519W"; flanks "15975356[,15976112^"; structure "0,1^2-"; splice_chain ",15975596^15975894-"; sources "Undefined,Undefined"; NMorMRNA "null"; degree "4"; dimension "2_2";
chr1	Undefined	as_event	15975596	15976551	.	+	.	transcript_id "MSTRG.2423.9,Os01t0382700-02"; gene_id "chr1:15975326-15980519W"; flanks "15975596^,15976551-"; structure "0,1-2^"; splice_chain ",15975894-15976112^"; sources "Undefined,Undefined"; NMorMRNA "null"; degree "4"; dimension "2_2";
chr1	Undefined	as_event	15975596	15976559	.	+	.	transcript_id "MSTRG.2423.4/MSTRG.2423.7,Os01t0382700-01"; gene_id "chr1:15975326-15980519W"; flanks "15975596^,15976559-"; structure "0,1-2^"; splice_chain ",15975894-15976112^"; sources "Undefined,Undefined"; NMorMRNA "null"; degree "4"; dimension "2_2";
chr1	Undefined	as_event	15975356	15976559	.	+	.	transcript_id "MSTRG.2423.4/MSTRG.2423.7,MSTRG.2423.2"; gene_id "chr1:15975326-15980519W"; flanks "15975356[,15976559-"; structure "1^,2^"; splice_chain "15975596^,15976112^"; sources "Undefined,Undefined"; NMorMRNA "null"; degree "4"; dimension "2_2";
chr1	Undefined	as_event	15976112	15976645	.	+	.	transcript_id "MSTRG.2423.10/MSTRG.2423.11/MSTRG.2423.3/Os01t0382700-02,MSTRG.2423.2/Os01t0382700-01"; gene_id "chr1:15975326-15980519W"; flanks "15976112^,15976645^"; structure "1-,2-"; splice_chain "15976551-,15976559-"; sources "Undefined,Undefined"; NMorMRNA "null"; degree "4"; dimension "2_2";
chr1	Undefined	as_event	15975894	15976645	.	+	.	transcript_id "MSTRG.2423.5/MSTRG.2423.6,Os01t0382700-02,Os01t0382700-01"; gene_id "chr1:15975326-15980519W"; flanks "15975894-,15976645^"; structure "0,1^2-,1^3-"; splice_chain ",15976112^15976551-,15976112^15976559-"; sources "Undefined,Undefined,Undefined"; NMorMRNA "null"; degree "9"; dimension "3_3";
chr1	Undefined	as_event	15975596	15976645	.	+	.	transcript_id "MSTRG.2423.5/MSTRG.2423.6,Os01t0382700-02,Os01t0382700-01,MSTRG.2423.9,MSTRG.2423.4/MSTRG.2423.7"; gene_id "chr1:15975326-15980519W"; flanks "15975596^,15976645^"; structure "1-,1-2^3-,1-2^4-,3-,4-"; splice_chain "15975894-,15975894-15976112^15976551-,15975894-15976112^15976559-,15976551-,15976559-"; sources "Undefined,Undefined,Undefined,Undefined,Undefined"; NMorMRNA "null"; degr…
chr1	Undefined	as_event	15975356	15976645	.	+	.	transcript_id "MSTRG.2423.5/MSTRG.2423.6,Os01t0382700-02,MSTRG.2423.4/MSTRG.2423.7,MSTRG.2423.3,MSTRG.2423.2"; gene_id "chr1:15975326-15980519W"; flanks "15975356[,15976645^"; structure "1^2-,1^2-3^4-,1^5-,3^4-,3^5-"; splice_chain "15975596^15975894-,15975596^15975894-15976112^15976551-,15975596^15976559-,15976112^15976551-,15976112^15976559-"; sources "Undefined,Undefined,Undefined,Undefined,Und…
chr1	Undefined	as_event	15978609	15980049	.	+	.	transcript_id "MSTRG.2423.3/MSTRG.2423.5,MSTRG.2423.11/MSTRG.2423.2/MSTRG.2423.6/MSTRG.2423.7/MSTRG.2423.9/Os01t0382700-01/Os01t0382700-02"; gene_id "chr1:15975326-15980519W"; flanks "15978609^,15980049^"; structure "1-,2-"; splice_chain "15979927-,15979954-"; sources "Undefined,Undefined"; NMorMRNA "null"; degree "4"; dimension "2_2";
chr1	Undefined	as_event	15977593	15980049	.	+	.	transcript_id "MSTRG.2423.4,MSTRG.2423.3/MSTRG.2423.5,MSTRG.2423.11/MSTRG.2423.2/MSTRG.2423.6/MSTRG.2423.7/MSTRG.2423.9/Os01t0382700-01/Os01t0382700-02"; gene_id "chr1:15975326-15980519W"; flanks "15977593-,15980049^"; structure "0,1^2-3^4-,1^2-3^5-"; splice_chain ",15977739^15978583-15978609^15979927-,15977739^15978583-15978609^15979954-"; sources "Undefined,Undefined,Undefined"; NMorMRNA "null"…
chr1	Undefined	as_event	15979954	15980513	.	+	.	transcript_id "MSTRG.2423.10,MSTRG.2423.11/MSTRG.2423.2/MSTRG.2423.6/MSTRG.2423.7/MSTRG.2423.9/Os01t0382700-01"; gene_id "chr1:15975326-15980519W"; flanks "15979954-,15980513]"; structure "0,1^2-"; splice_chain ",15980049^15980159-"; sources "Undefined,Undefined"; NMorMRNA "null"; degree "4"; dimension "2_2";
chr1	Undefined	as_event	15978609	15980513	.	+	.	transcript_id "MSTRG.2423.3/MSTRG.2423.5,MSTRG.2423.10,MSTRG.2423.11/MSTRG.2423.2/MSTRG.2423.6/MSTRG.2423.7/MSTRG.2423.9/Os01t0382700-01"; gene_id "chr1:15975326-15980519W"; flanks "15978609^,15980513]"; structure "1-3^4-,2-,2-3^4-"; splice_chain "15979927-15980049^15980159-,15979954-,15979954-15980049^15980159-"; sources "Undefined,Undefined,Undefined"; NMorMRNA "null"; degree "9"; dimension "3_…
chr1	Undefined	as_event	15977593	15980513	.	+	.	transcript_id "MSTRG.2423.3/MSTRG.2423.5,MSTRG.2423.10,MSTRG.2423.11/MSTRG.2423.2/MSTRG.2423.6/MSTRG.2423.7/MSTRG.2423.9/Os01t0382700-01,MSTRG.2423.4"; gene_id "chr1:15975326-15980519W"; flanks "15977593-,15980513]"; structure "1^2-3^4-6^7-,1^2-3^5-,1^2-3^5-6^7-,6^7-"; splice_chain "15977739^15978583-15978609^15979927-15980049^15980159-,15977739^15978583-15978609^15979954-,15977739^15978583-15978…
chr1	Undefined	as_event	15993356	15994473	.	+	.	transcript_id "MSTRG.2424.3,MSTRG.2424.1/Os01t0382900-01,MSTRG.2424.2"; gene_id "chr1:15992279-15997270W"; flanks "15993356^,15994473^"; structure "1-,2-,3-"; splice_chain "15994252-,15994344-,15994349-"; sources "Undefined,Undefined,Undefined"; NMorMRNA "null"; degree "9"; dimension "3_3";
chr1	Undefined	as_event	16046692	16047213	.	+	.	transcript_id "MSTRG.2433.1/MSTRG.2433.3/MSTRG.2433.4/MSTRG.2433.5/MSTRG.2433.7,MSTRG.2433.2/Os01t0383700-01"; gene_id "chr1:16046692-16056268W"; flanks "16046692[,16047213-"; structure "1^,2^"; splice_chain "16046929^,16046935^"; sources "Undefined,Undefined"; NMorMRNA "null"; degree "4"; dimension "2_2";
chr1	Undefined	as_event	16047213	16048106	.	+	.	transcript_id "MSTRG.2433.1/MSTRG.2433.10/MSTRG.2433.11/MSTRG.2433.12/MSTRG.2433.13/MSTRG.2433.16/MSTRG.2433.17/MSTRG.2433.18/MSTRG.2433.19/MSTRG.2433.2/MSTRG.2433.20/MSTRG.2433.21/MSTRG.2433.22/MSTRG.2433.23/MSTRG.2433.25/MSTRG.2433.26/MSTRG.2433.27/MSTRG.2433.28/MSTRG.2433.3/MSTRG.2433.4/MSTRG.2433.5/MSTRG.2433.9/Os01t0383700-01,MSTRG.2433.7"; gene_id "chr1:16046692-16056268W"; flanks "16047213…
chr1	Undefined	as_event	16046935	16048106	.	+	.	transcript_id "MSTRG.2433.24/MSTRG.2433.6,MSTRG.2433.10/MSTRG.2433.11/MSTRG.2433.12/MSTRG.2433.16/MSTRG.2433.17/MSTRG.2433.18/MSTRG.2433.19/MSTRG.2433.2/MSTRG.2433.20/MSTRG.2433.21/MSTRG.2433.22/MSTRG.2433.25/MSTRG.2433.26/MSTRG.2433.27/MSTRG.2433.28/MSTRG.2433.9/Os01t0383700-01"; gene_id "chr1:16046692-16056268W"; flanks "16046935^,16048106-"; structure "0,1-2^"; splice_chain ",16047213-16047332…
chr1	Undefined	as_event	16046929	16048106	.	+	.	transcript_id "MSTRG.2433.14/MSTRG.2433.15,MSTRG.2433.1/MSTRG.2433.13/MSTRG.2433.23/MSTRG.2433.3/MSTRG.2433.4/MSTRG.2433.5,MSTRG.2433.7"; gene_id "chr1:16046692-16056268W"; flanks "16046929^,16048106-"; structure "0,1-2^,1-3^"; splice_chain ",16047213-16047332^,16047213-16047539^"; sources "Undefined,Undefined,Undefined"; NMorMRNA "null"; degree "9"; dimension "3_3";
chr1	Undefined	as_event	16046701	16048106	.	+	.	transcript_id "MSTRG.2433.23,MSTRG.2433.24"; gene_id "chr1:16046692-16056268W"; flanks "16046701[,16048106-"; structure "1^3-4^,2^"; splice_chain "16046929^16047213-16047332^,16046935^"; sources "Undefined,Undefined"; NMorMRNA "null"; degree "4"; dimension "2_2";
chr1	Undefined	as_event	16046692	16048106	.	+	.	transcript_id "MSTRG.2433.1/MSTRG.2433.3/MSTRG.2433.4/MSTRG.2433.5,MSTRG.2433.7,MSTRG.2433.6,MSTRG.2433.2/Os01t0383700-01"; gene_id "chr1:16046692-16056268W"; flanks "16046692[,16048106-"; structure "1^3-4^,1^3-5^,2^,2^3-4^"; splice_chain "16046929^16047213-16047332^,16046929^16047213-16047539^,16046935^,16046935^16047213-16047332^"; sources "Undefined,Undefined,Undefined,Undefined"; NMorMRNA "nu…
chr1	Undefined	as_event	16048340	16048483	.	+	.	transcript_id "MSTRG.2433.21,MSTRG.2433.15/MSTRG.2433.18/MSTRG.2433.7/MSTRG.2433.9"; gene_id "chr1:16046692-16056268W"; flanks "16048340^,16048483^"; structure "1-,2-"; splice_chain "16048398-,16048426-"; sources "Undefined,Undefined"; NMorMRNA "null"; degree "4"; dimension "2_2";
chr1	Undefined	as_event	16048106	16048483	.	+	.	transcript_id "MSTRG.2433.1/MSTRG.2433.10/MSTRG.2433.11/MSTRG.2433.13/MSTRG.2433.14/MSTRG.2433.16/MSTRG.2433.17/MSTRG.2433.19/MSTRG.2433.2/MSTRG.2433.20/MSTRG.2433.22/MSTRG.2433.23/MSTRG.2433.25/MSTRG.2433.26/MSTRG.2433.27/MSTRG.2433.28/MSTRG.2433.3/MSTRG.2433.4/MSTRG.2433.5/MSTRG.2433.6,MSTRG.2433.21,MSTRG.2433.15/MSTRG.2433.18/MSTRG.2433.7/MSTRG.2433.9"; gene_id "chr1:16046692-16056268W"; flank…
chr1	Undefined	as_event	16048106	16048616	.	+	.	transcript_id "MSTRG.2433.15/MSTRG.2433.18/MSTRG.2433.7/MSTRG.2433.9,MSTRG.2433.12/MSTRG.2433.24/Os01t0383700-01,MSTRG.2433.1/MSTRG.2433.10/MSTRG.2433.11/MSTRG.2433.13/MSTRG.2433.14/MSTRG.2433.16/MSTRG.2433.17/MSTRG.2433.19/MSTRG.2433.2/MSTRG.2433.20/MSTRG.2433.22/MSTRG.2433.23/MSTRG.2433.28/MSTRG.2433.3/MSTRG.2433.4/MSTRG.2433.5/MSTRG.2433.6"; gene_id "chr1:16046692-16056268W"; flanks "16048106-…
chr1	Undefined	as_event	16048483	16048735	.	+	.	transcript_id "MSTRG.2433.1/MSTRG.2433.10/MSTRG.2433.11/MSTRG.2433.13/MSTRG.2433.14/MSTRG.2433.15/MSTRG.2433.16/MSTRG.2433.17/MSTRG.2433.18/MSTRG.2433.19/MSTRG.2433.2/MSTRG.2433.20/MSTRG.2433.22/MSTRG.2433.23/MSTRG.2433.28/MSTRG.2433.3/MSTRG.2433.4/MSTRG.2433.5/MSTRG.2433.6/MSTRG.2433.7/MSTRG.2433.9,MSTRG.2433.21/MSTRG.2433.25/MSTRG.2433.26/MSTRG.2433.27"; gene_id "chr1:16046692-16056268W"; flank…
chr1	Undefined	as_event	16048106	16048735	.	+	.	transcript_id "MSTRG.2433.21,MSTRG.2433.15/MSTRG.2433.18/MSTRG.2433.7/MSTRG.2433.9,MSTRG.2433.12/MSTRG.2433.24/Os01t0383700-01,MSTRG.2433.1/MSTRG.2433.10/MSTRG.2433.11/MSTRG.2433.13/MSTRG.2433.14/MSTRG.2433.16/MSTRG.2433.17/MSTRG.2433.19/MSTRG.2433.2/MSTRG.2433.20/MSTRG.2433.22/MSTRG.2433.23/MSTRG.2433.28/MSTRG.2433.3/MSTRG.2433.4/MSTRG.2433.5/MSTRG.2433.6,MSTRG.2433.25/MSTRG.2433.26/MSTRG.2433.2…
chr1	Undefined	as_event	16050781	16051865	.	+	.	transcript_id "MSTRG.2433.1/MSTRG.2433.10/MSTRG.2433.11/MSTRG.2433.13/MSTRG.2433.15/MSTRG.2433.18/MSTRG.2433.2/MSTRG.2433.21/MSTRG.2433.4/Os01t0383700-01,MSTRG.2433.16/MSTRG.2433.17/MSTRG.2433.19/MSTRG.2433.20/MSTRG.2433.22/MSTRG.2433.23/MSTRG.2433.24/MSTRG.2433.26/MSTRG.2433.28/MSTRG.2433.3/MSTRG.2433.5/MSTRG.2433.7"; gene_id "chr1:16046692-16056268W"; flanks "16050781-,16051865-"; structure "1^…
chr1	Undefined	as_event	16050954	16051942	.	+	.	transcript_id "MSTRG.2433.1/MSTRG.2433.10/MSTRG.2433.11/MSTRG.2433.13/MSTRG.2433.18/MSTRG.2433.2/MSTRG.2433.4/Os01t0383700-01,MSTRG.2433.12/MSTRG.2433.25/MSTRG.2433.27/MSTRG.2433.9"; gene_id "chr1:16046692-16056268W"; flanks "16050954^,16051942^"; structure "1-,2-"; splice_chain "16051865-,16051881-"; sources "Undefined,Undefined"; NMorMRNA "null"; degree "4"; dimension "2_2";
chr1	Undefined	as_event	16050781	16051942	.	+	.	transcript_id "MSTRG.2433.14/MSTRG.2433.6,MSTRG.2433.1/MSTRG.2433.10/MSTRG.2433.11/MSTRG.2433.13/MSTRG.2433.18/MSTRG.2433.2/MSTRG.2433.4/Os01t0383700-01,MSTRG.2433.12/MSTRG.2433.25/MSTRG.2433.27/MSTRG.2433.9,MSTRG.2433.16/MSTRG.2433.17/MSTRG.2433.19/MSTRG.2433.20/MSTRG.2433.22/MSTRG.2433.23/MSTRG.2433.26/MSTRG.2433.28/MSTRG.2433.3/MSTRG.2433.5/MSTRG.2433.7"; gene_id "chr1:16046692-16056268W"; fla…
chr1	Undefined	as_event	16052359	16052933	.	+	.	transcript_id "MSTRG.2433.12/MSTRG.2433.25/MSTRG.2433.27,MSTRG.2433.1/MSTRG.2433.10/MSTRG.2433.11/MSTRG.2433.13/MSTRG.2433.14/MSTRG.2433.18/MSTRG.2433.2/MSTRG.2433.20/MSTRG.2433.22/MSTRG.2433.23/MSTRG.2433.26/MSTRG.2433.28"; gene_id "chr1:16046692-16056268W"; flanks "16052359-,16052933^"; structure "0,1^2-"; splice_chain ",16052531^16052778-"; sources "Undefined,Undefined"; NMorMRNA "null"; degre…
chr1	Undefined	as_event	16051865	16052933	.	+	.	transcript_id "MSTRG.2433.15/MSTRG.2433.21/MSTRG.2433.24,MSTRG.2433.1/MSTRG.2433.10/MSTRG.2433.11/MSTRG.2433.13/MSTRG.2433.18/MSTRG.2433.2/MSTRG.2433.20/MSTRG.2433.22/MSTRG.2433.23/MSTRG.2433.26/MSTRG.2433.28"; gene_id "chr1:16046692-16056268W"; flanks "16051865-,16052933^"; structure "0,1^2-3^4-"; splice_chain ",16051942^16052359-16052531^16052778-"; sources "Undefined,Undefined"; NMorMRNA "null…
chr1	Undefined	as_event	16050954	16052933	.	+	.	transcript_id "MSTRG.2433.15/MSTRG.2433.21,MSTRG.2433.1/MSTRG.2433.10/MSTRG.2433.11/MSTRG.2433.13/MSTRG.2433.18/MSTRG.2433.2,MSTRG.2433.12/MSTRG.2433.25/MSTRG.2433.27"; gene_id "chr1:16046692-16056268W"; flanks "16050954^,16052933^"; structure "1-,1-3^4-5^6-,2-3^4-"; splice_chain "16051865-,16051865-16051942^16052359-16052531^16052778-,16051881-16051942^16052359-"; sources "Undefined,Undefined,Un…
chr1	Undefined	as_event	16050781	16052933	.	+	.	transcript_id "MSTRG.2433.15/MSTRG.2433.21,MSTRG.2433.1/MSTRG.2433.10/MSTRG.2433.11/MSTRG.2433.13/MSTRG.2433.18/MSTRG.2433.2,MSTRG.2433.12/MSTRG.2433.25/MSTRG.2433.27,MSTRG.2433.24,MSTRG.2433.20/MSTRG.2433.22/MSTRG.2433.23/MSTRG.2433.26/MSTRG.2433.28,MSTRG.2433.14"; gene_id "chr1:16046692-16056268W"; flanks "16050781-,16052933^"; structure "1^3-,1^3-5^6-7^8-,1^4-5^6-,2^3-,2^3-5^6-7^8-,5^6-7^8-"; …
chr1	Undefined	as_event	16052778	16054698	.	+	.	transcript_id "MSTRG.2433.19/MSTRG.2433.4/MSTRG.2433.5,MSTRG.2433.22/MSTRG.2433.26"; gene_id "chr1:16046692-16056268W"; flanks "16052778-,16054698^"; structure "0,1^2-"; splice_chain ",16052933^16054513-"; sources "Undefined,Undefined"; NMorMRNA "null"; degree "4"; dimension "2_2";
chr1	Undefined	as_event	16052933	16054836	.	+	.	transcript_id "MSTRG.2433.1/MSTRG.2433.18/MSTRG.2433.2/MSTRG.2433.24/MSTRG.2433.27/MSTRG.2433.28,MSTRG.2433.22/MSTRG.2433.26"; gene_id "chr1:16046692-16056268W"; flanks "16052933^,16054836-"; structure "0,1-2^"; splice_chain ",16054513-16054698^"; sources "Undefined,Undefined"; NMorMRNA "null"; degree "4"; dimension "2_2";
chr1	Undefined	as_event	16052778	16054836	.	+	.	transcript_id "MSTRG.2433.1/MSTRG.2433.18/MSTRG.2433.2/MSTRG.2433.28,MSTRG.2433.22/MSTRG.2433.26,MSTRG.2433.19/MSTRG.2433.4/MSTRG.2433.5"; gene_id "chr1:16046692-16056268W"; flanks "16052778-,16054836-"; structure "1^,1^2-3^,3^"; splice_chain "16052933^,16052933^16054513-16054698^,16054698^"; sources "Undefined,Undefined,Undefined"; NMorMRNA "null"; degree "9"; dimension "3_3";
chr1	Undefined	as_event	16052359	16054836	.	+	.	transcript_id "MSTRG.2433.1/MSTRG.2433.18/MSTRG.2433.2/MSTRG.2433.28,MSTRG.2433.22/MSTRG.2433.26,MSTRG.2433.19/MSTRG.2433.4/MSTRG.2433.5,MSTRG.2433.27"; gene_id "chr1:16046692-16056268W"; flanks "16052359-,16054836-"; structure "1^2-3^,1^2-3^4-5^,1^2-5^,3^"; splice_chain "16052531^16052778-16052933^,16052531^16052778-16052933^16054513-16054698^,16052531^16052778-16054698^,16052933^"; sources "Und…
chr1	Undefined	as_event	16051865	16054836	.	+	.	transcript_id "MSTRG.2433.1/MSTRG.2433.18/MSTRG.2433.2/MSTRG.2433.28,MSTRG.2433.22/MSTRG.2433.26,MSTRG.2433.19/MSTRG.2433.4/MSTRG.2433.5,MSTRG.2433.24"; gene_id "chr1:16046692-16056268W"; flanks "16051865-,16054836-"; structure "1^2-3^4-5^,1^2-3^4-5^6-7^,1^2-3^4-7^,5^"; splice_chain "16051942^16052359-16052531^16052778-16052933^,16051942^16052359-16052531^16052778-16052933^16054513-16054698^,1605…
chr1	Undefined	as_event	16050781	16054836	.	+	.	transcript_id "MSTRG.2433.1/MSTRG.2433.18/MSTRG.2433.2,MSTRG.2433.4,MSTRG.2433.27,MSTRG.2433.28,MSTRG.2433.22/MSTRG.2433.26,MSTRG.2433.19/MSTRG.2433.5,MSTRG.2433.24"; gene_id "chr1:16046692-16056268W"; flanks "16050781-,16054836-"; structure "1^3-5^6-7^8-9^,1^3-5^6-7^8-11^,1^4-5^6-9^,2^3-5^6-7^8-9^,2^3-5^6-7^8-9^10-11^,2^3-5^6-7^8-11^,2^3-9^"; splice_chain "16050954^16051865-16051942^16052359-160…
chr1	Undefined	as_event	16052778	16054896	.	+	.	transcript_id "MSTRG.2433.16/MSTRG.2433.3/Os01t0383700-01,MSTRG.2433.22/MSTRG.2433.26,MSTRG.2433.1/MSTRG.2433.2/MSTRG.2433.28,MSTRG.2433.19/MSTRG.2433.4/MSTRG.2433.5"; gene_id "chr1:16046692-16056268W"; flanks "16052778-,16054896^"; structure "0,1^2-3^4-,1^4-,3^4-"; splice_chain ",16052933^16054513-16054698^16054836-,16052933^16054836-,16054698^16054836-"; sources "Undefined,Undefined,Undefined,U…
chr1	Undefined	as_event	16052933	16055684	.	+	.	transcript_id "MSTRG.2433.10/MSTRG.2433.13,MSTRG.2433.22/MSTRG.2433.26,MSTRG.2433.1/MSTRG.2433.2/MSTRG.2433.28"; gene_id "chr1:16046692-16056268W"; flanks "16052933^,16055684-"; structure "0,1-2^3-4^,3-4^"; splice_chain ",16054513-16054698^16054836-16054896^,16054836-16054896^"; sources "Undefined,Undefined,Undefined"; NMorMRNA "null"; degree "9"; dimension "3_3";
chr1	Undefined	as_event	16052778	16055684	.	+	.	transcript_id "MSTRG.2433.10/MSTRG.2433.13,MSTRG.2433.22/MSTRG.2433.26,MSTRG.2433.1/MSTRG.2433.2/MSTRG.2433.28,MSTRG.2433.19/MSTRG.2433.4/MSTRG.2433.5,MSTRG.2433.16/MSTRG.2433.3/Os01t0383700-01"; gene_id "chr1:16046692-16056268W"; flanks "16052778-,16055684-"; structure "1^,1^2-3^4-5^,1^4-5^,3^4-5^,5^"; splice_chain "16052933^,16052933^16054513-16054698^16054836-16054896^,16052933^16054836-160548…
chr1	Undefined	as_event	16054836	16056268	.	+	.	transcript_id "MSTRG.2433.18/MSTRG.2433.24/MSTRG.2433.27,MSTRG.2433.1/MSTRG.2433.19/MSTRG.2433.2/MSTRG.2433.22/MSTRG.2433.26/MSTRG.2433.28/MSTRG.2433.4/MSTRG.2433.5"; gene_id "chr1:16046692-16056268W"; flanks "16054836-,16056268]"; structure "0,1^2-"; splice_chain ",16054896^16055684-"; sources "Undefined,Undefined"; NMorMRNA "null"; degree "4"; dimension "2_2";
chr1	Undefined	as_event	16054513	16056268	.	+	.	transcript_id "MSTRG.2433.11/MSTRG.2433.12/MSTRG.2433.15/MSTRG.2433.20/MSTRG.2433.21/MSTRG.2433.23,MSTRG.2433.22/MSTRG.2433.26"; gene_id "chr1:16046692-16056268W"; flanks "16054513-,16056268]"; structure "0,1^2-3^4-"; splice_chain ",16054698^16054836-16054896^16055684-"; sources "Undefined,Undefined"; NMorMRNA "null"; degree "4"; dimension "2_2";
chr1	Undefined	as_event	16052933	16056268	.	+	.	transcript_id "MSTRG.2433.14/MSTRG.2433.25,MSTRG.2433.11/MSTRG.2433.12/MSTRG.2433.15/MSTRG.2433.20/MSTRG.2433.21/MSTRG.2433.23,MSTRG.2433.22/MSTRG.2433.26,MSTRG.2433.18/MSTRG.2433.24/MSTRG.2433.27,MSTRG.2433.1/MSTRG.2433.2/MSTRG.2433.28,MSTRG.2433.10/MSTRG.2433.13"; gene_id "chr1:16046692-16056268W"; flanks "16052933^,16056268]"; structure "1-,2-,2-3^4-5^6-,4-,4-5^6-,6-"; splice_chain "16053631-,…
chr1	Undefined	as_event	16052778	16056268	.	+	.	transcript_id "MSTRG.2433.17/MSTRG.2433.9,MSTRG.2433.14,MSTRG.2433.11/MSTRG.2433.20/MSTRG.2433.23,MSTRG.2433.22/MSTRG.2433.26,MSTRG.2433.18,MSTRG.2433.1/MSTRG.2433.2/MSTRG.2433.28,MSTRG.2433.10/MSTRG.2433.13,MSTRG.2433.19/MSTRG.2433.4/MSTRG.2433.5,MSTRG.2433.16/MSTRG.2433.3/Os01t0383700-01"; gene_id "chr1:16046692-16056268W"; flanks "16052778-,16056268]"; structure "0,1^2-,1^3-,1^3-4^5-6^7-,1^5-,…
chr1	Undefined	as_event	16052359	16056268	.	+	.	transcript_id "MSTRG.2433.6/MSTRG.2433.7,MSTRG.2433.17/MSTRG.2433.9,MSTRG.2433.14,MSTRG.2433.11/MSTRG.2433.20/MSTRG.2433.23,MSTRG.2433.22/MSTRG.2433.26,MSTRG.2433.18,MSTRG.2433.1/MSTRG.2433.2/MSTRG.2433.28,MSTRG.2433.10/MSTRG.2433.13,MSTRG.2433.19/MSTRG.2433.4/MSTRG.2433.5,MSTRG.2433.16/MSTRG.2433.3/Os01t0383700-01,MSTRG.2433.25,MSTRG.2433.12,MSTRG.2433.27"; gene_id "chr1:16046692-16056268W"; fla…
chr1	Undefined	as_event	16051865	16056268	.	+	.	transcript_id "MSTRG.2433.7,MSTRG.2433.17,MSTRG.2433.11/MSTRG.2433.20/MSTRG.2433.23,MSTRG.2433.22/MSTRG.2433.26,MSTRG.2433.18,MSTRG.2433.1/MSTRG.2433.2/MSTRG.2433.28,MSTRG.2433.10/MSTRG.2433.13,MSTRG.2433.19/MSTRG.2433.4/MSTRG.2433.5,MSTRG.2433.16/MSTRG.2433.3/Os01t0383700-01,MSTRG.2433.15/MSTRG.2433.21,MSTRG.2433.24"; gene_id "chr1:16046692-16056268W"; flanks "16051865-,16056268]"; structure "1^…
chr1	Undefined	as_event	16050954	16056268	.	+	.	transcript_id "MSTRG.2433.11,MSTRG.2433.18,MSTRG.2433.1/MSTRG.2433.2,MSTRG.2433.10/MSTRG.2433.13,MSTRG.2433.4,Os01t0383700-01,MSTRG.2433.15/MSTRG.2433.21,MSTRG.2433.9,MSTRG.2433.25,MSTRG.2433.12,MSTRG.2433.27"; gene_id "chr1:16046692-16056268W"; flanks "16050954^,16056268]"; structure "1-3^4-5^6-7^9-,1-3^4-5^6-7^11-,1-3^4-5^6-7^11-12^13-,1-3^4-5^6-7^13-,1-3^4-5^6-10^11-12^13-,1-3^4-5^6-12^13-,1-7…
chr1	Undefined	as_event	16050781	16056268	.	+	.	transcript_id "MSTRG.2433.11,MSTRG.2433.18,MSTRG.2433.1/MSTRG.2433.2,MSTRG.2433.10/MSTRG.2433.13,MSTRG.2433.4,Os01t0383700-01,MSTRG.2433.15/MSTRG.2433.21,MSTRG.2433.9,MSTRG.2433.25,MSTRG.2433.12,MSTRG.2433.27,MSTRG.2433.7,MSTRG.2433.17,MSTRG.2433.20/MSTRG.2433.23,MSTRG.2433.22/MSTRG.2433.26,MSTRG.2433.28,MSTRG.2433.19/MSTRG.2433.5,MSTRG.2433.16/MSTRG.2433.3,MSTRG.2433.24,MSTRG.2433.6,MSTRG.2433.1…
chr1	Undefined	as_event	16204314	16204605	.	+	.	transcript_id "MSTRG.2445.4,MSTRG.2445.2"; gene_id "chr1:16202477-16205281W"; flanks "16204314^,16204605-"; structure "0,1-2^"; splice_chain ",16204405-16204472^"; sources "Undefined,Undefined"; NMorMRNA "null"; degree "4"; dimension "2_2";
chr1	Undefined	as_event	16204184	16204605	.	+	.	transcript_id "MSTRG.2445.4,MSTRG.2445.2,MSTRG.2445.3"; gene_id "chr1:16202477-16205281W"; flanks "16204184-,16204605-"; structure "1^,1^3-4^,2^"; splice_chain "16204314^,16204314^16204405-16204472^,16204404^"; sources "Undefined,Undefined,Undefined"; NMorMRNA "null"; degree "9"; dimension "3_3";
chr1	Undefined	as_event	16204184	16205281	.	+	.	transcript_id "MSTRG.2445.1,MSTRG.2445.2,MSTRG.2445.3"; gene_id "chr1:16202477-16205281W"; flanks "16204184-,16205281]"; structure "0,1^3-4^5-,2^5-"; splice_chain ",16204314^16204405-16204472^16204605-,16204404^16204605-"; sources "Undefined,Undefined,Undefined"; NMorMRNA "null"; degree "9"; dimension "3_3";
chr1	Undefined	as_event	16232158	16233063	.	+	.	transcript_id "MSTRG.2448.2/MSTRG.2448.3,MSTRG.2448.1/MSTRG.2448.4/MSTRG.2448.5/MSTRG.2448.6/MSTRG.2448.7/Os01t0386700-01"; gene_id "chr1:16232158-16234453W"; flanks "16232158[,16233063^"; structure "0,1^2-"; splice_chain ",16232583^16232984-"; sources "Undefined,Undefined"; NMorMRNA "null"; degree "4"; dimension "2_2";
chr1	Undefined	as_event	16233530	16233920	.	+	.	transcript_id "MSTRG.2448.5/Os01t0386700-01,MSTRG.2448.2"; gene_id "chr1:16232158-16234453W"; flanks "16233530-,16233920^"; structure "0,1^2-"; splice_chain ",16233693^16233789-"; sources "Undefined,Undefined"; NMorMRNA "null"; degree "4"; dimension "2_2";
chr1	Undefined	as_event	16233063	16233920	.	+	.	transcript_id "MSTRG.2448.7,MSTRG.2448.5/Os01t0386700-01,MSTRG.2448.2"; gene_id "chr1:16232158-16234453W"; flanks "16233063^,16233920^"; structure "1-,2-,2-3^4-"; splice_chain "16233521-,16233530-,16233530-16233693^16233789-"; sources "Undefined,Undefined,Undefined"; NMorMRNA "null"; degree "9"; dimension "3_3";
chr1	Undefined	as_event	16233789	16234117	.	+	.	transcript_id "MSTRG.2448.4,MSTRG.2448.2"; gene_id "chr1:16232158-16234453W"; flanks "16233789-,16234117^"; structure "0,1^2-"; splice_chain ",16233920^16234057-"; sources "Undefined,Undefined"; NMorMRNA "null"; degree "4"; dimension "2_2";
chr1	Undefined	as_event	16233530	16234117	.	+	.	transcript_id "MSTRG.2448.1,MSTRG.2448.4,MSTRG.2448.2,MSTRG.2448.5"; gene_id "chr1:16232158-16234453W"; flanks "16233530-,16234117^"; structure "0,1^2-,1^2-3^4-,3^4-"; splice_chain ",16233693^16233789-,16233693^16233789-16233920^16234057-,16233920^16234057-"; sources "Undefined,Undefined,Undefined,Undefined"; NMorMRNA "null"; degree "16"; dimension "4_4";
chr1	Undefined	as_event	16233063	16234117	.	+	.	transcript_id "MSTRG.2448.7,MSTRG.2448.1,MSTRG.2448.4,MSTRG.2448.2,MSTRG.2448.5"; gene_id "chr1:16232158-16234453W"; flanks "16233063^,16234117^"; structure "1-5^6-,2-,2-3^4-,2-3^4-5^6-,2-5^6-"; splice_chain "16233521-16233920^16234057-,16233530-,16233530-16233693^16233789-,16233530-16233693^16233789-16233920^16234057-,16233530-16233920^16234057-"; sources "Undefined,Undefined,Undefined,Undefined…
chr1	Undefined	as_event	16233530	16234212	.	+	.	transcript_id "MSTRG.2448.2,MSTRG.2448.4,MSTRG.2448.5,MSTRG.2448.1,MSTRG.2448.6"; gene_id "chr1:16232158-16234453W"; flanks "16233530-,16234212-"; structure "1^2-3^4-5^,1^2-5^,3^4-5^,5^,6^"; splice_chain "16233693^16233789-16233920^16234057-16234117^,16233693^16233789-16234117^,16233920^16234057-16234117^,16234117^,16234132^"; sources "Undefined,Undefined,Undefined,Undefined,Undefined"; NMorMRNA …
chr1	Undefined	as_event	16233063	16234212	.	+	.	transcript_id "MSTRG.2448.7,MSTRG.2448.2,MSTRG.2448.4,MSTRG.2448.5,MSTRG.2448.1,MSTRG.2448.6"; gene_id "chr1:16232158-16234453W"; flanks "16233063^,16234212-"; structure "1-5^6-7^,2-3^4-5^6-7^,2-3^4-7^,2-5^6-7^,2-7^,2-8^"; splice_chain "16233521-16233920^16234057-16234117^,16233530-16233693^16233789-16233920^16234057-16234117^,16233530-16233693^16233789-16234117^,16233530-16233920^16234057-162341…
chr1	Undefined	as_event	16234057	16234453	.	+	.	transcript_id "Os01t0386700-01,MSTRG.2448.2/MSTRG.2448.5/MSTRG.2448.7"; gene_id "chr1:16232158-16234453W"; flanks "16234057-,16234453]"; structure "0,1^2-"; splice_chain ",16234117^16234212-"; sources "Undefined,Undefined"; NMorMRNA "null"; degree "4"; dimension "2_2";
chr1	Undefined	as_event	16233789	16234453	.	+	.	transcript_id "MSTRG.2448.3,MSTRG.2448.2,MSTRG.2448.4"; gene_id "chr1:16232158-16234453W"; flanks "16233789-,16234453]"; structure "0,1^2-3^4-,3^4-"; splice_chain ",16233920^16234057-16234117^16234212-,16234117^16234212-"; sources "Undefined,Undefined,Undefined"; NMorMRNA "null"; degree "9"; dimension "3_3";
chr1	Undefined	as_event	16233530	16234453	.	+	.	transcript_id "MSTRG.2448.3,MSTRG.2448.2,MSTRG.2448.4,Os01t0386700-01,MSTRG.2448.5,MSTRG.2448.1,MSTRG.2448.6"; gene_id "chr1:16232158-16234453W"; flanks "16233530-,16234453]"; structure "1^2-,1^2-3^4-5^7-,1^2-5^7-,3^4-,3^4-5^7-,5^7-,6^7-"; splice_chain "16233693^16233789-,16233693^16233789-16233920^16234057-16234117^16234212-,16233693^16233789-16234117^16234212-,16233920^16234057-,16233920^162340…
chr1	Undefined	as_event	16233063	16234453	.	+	.	transcript_id "MSTRG.2448.7,MSTRG.2448.3,MSTRG.2448.2,MSTRG.2448.4,Os01t0386700-01,MSTRG.2448.5,MSTRG.2448.1,MSTRG.2448.6"; gene_id "chr1:16232158-16234453W"; flanks "16233063^,16234453]"; structure "1-5^6-7^9-,2-3^4-,2-3^4-5^6-7^9-,2-3^4-7^9-,2-5^6-,2-5^6-7^9-,2-7^9-,2-8^9-"; splice_chain "16233521-16233920^16234057-16234117^16234212-,16233530-16233693^16233789-,16233530-16233693^16233789-162339…
chr1	Undefined	as_event	16375260	16375520	.	+	.	transcript_id "MSTRG.2462.2/MSTRG.2462.4,MSTRG.2462.1/MSTRG.2462.3"; gene_id "chr1:16364860-16389884W"; flanks "16375260^,16375520^"; structure "1-,2-"; splice_chain "16375330-,16375343-"; sources "Undefined,Undefined"; NMorMRNA "null"; degree "4"; dimension "2_2";
chr1	Undefined	as_event	16376908	16378238	.	+	.	transcript_id "MSTRG.2462.2,MSTRG.2462.1/MSTRG.2462.3/MSTRG.2462.4"; gene_id "chr1:16364860-16389884W"; flanks "16376908-,16378238-"; structure "1^,2^"; splice_chain "16377065^,16377081^"; sources "Undefined,Undefined"; NMorMRNA "null"; degree "4"; dimension "2_2";
chr1	Undefined	as_event	16385505	16386247	.	+	.	transcript_id "MSTRG.2462.2,MSTRG.2462.1/MSTRG.2462.4"; gene_id "chr1:16364860-16389884W"; flanks "16385505-,16386247^"; structure "0,1^2-"; splice_chain ",16386020^16386106-"; sources "Undefined,Undefined"; NMorMRNA "null"; degree "4"; dimension "2_2";
chr1	Undefined	as_event	16385505	16387574	.	+	.	transcript_id "MSTRG.2462.3,MSTRG.2462.1/MSTRG.2462.4,MSTRG.2462.2"; gene_id "chr1:16364860-16389884W"; flanks "16385505-,16387574^"; structure "0,1^2-3^4-,3^4-"; splice_chain ",16386020^16386106-16386247^16387430-,16386247^16387430-"; sources "Undefined,Undefined,Undefined"; NMorMRNA "null"; degree "9"; dimension "3_3";
chr1	Undefined	as_event	16480404	16481817	.	+	.	transcript_id "MSTRG.2469.3/MSTRG.2469.4/MSTRG.2469.5,Os01t0390400-03"; gene_id "chr1:16480398-16494334W"; flanks "16480404[,16481817^"; structure "0,1^2-"; splice_chain ",16481231^16481719-"; sources "Undefined,Undefined"; NMorMRNA "null"; degree "4"; dimension "2_2";
chr1	Undefined	as_event	16481817	16483250	.	+	.	transcript_id "MSTRG.2469.3/MSTRG.2469.5/Os01t0390400-01,MSTRG.2469.4/Os01t0390400-02/Os01t0390400-03"; gene_id "chr1:16480398-16494334W"; flanks "16481817^,16483250-"; structure "0,1-2^"; splice_chain ",16482753-16482805^"; sources "Undefined,Undefined"; NMorMRNA "null"; degree "4"; dimension "2_2";
chr1	Undefined	as_event	16490741	16491776	.	+	.	transcript_id "MSTRG.2469.3,MSTRG.2469.4/MSTRG.2469.5/Os01t0390400-01/Os01t0390400-03"; gene_id "chr1:16480398-16494334W"; flanks "16490741-,16491776^"; structure "0,1^2-"; splice_chain ",16490814^16491634-"; sources "Undefined,Undefined"; NMorMRNA "null"; degree "4"; dimension "2_2";
chr1	Undefined	as_event	16498448	16502244	.	+	.	transcript_id "MSTRG.2470.3,MSTRG.2470.2/MSTRG.2470.4"; gene_id "chr1:16495359-16503342W"; flanks "16498448^,16502244-"; structure "0,1-2^"; splice_chain ",16498549-16498635^"; sources "Undefined,Undefined"; NMorMRNA "null"; degree "4"; dimension "2_2";
chr1	Undefined	as_event	16498635	16503329	.	+	.	transcript_id "MSTRG.2470.4,Os01t0390600-01"; gene_id "chr1:16495359-16503342W"; flanks "16498635^,16503329]"; structure "1-,2-"; splice_chain "16502244-,16502929-"; sources "Undefined,Undefined"; NMorMRNA "null"; degree "4"; dimension "2_2";
chr1	Undefined	as_event	16498448	16503329	.	+	.	transcript_id "MSTRG.2470.4,Os01t0390600-01,MSTRG.2470.3"; gene_id "chr1:16495359-16503342W"; flanks "16498448^,16503329]"; structure "1-2^3-,1-2^4-,3-"; splice_chain "16498549-16498635^16502244-,16498549-16498635^16502929-,16502244-"; sources "Undefined,Undefined,Undefined"; NMorMRNA "null"; degree "9"; dimension "3_3";
chr1	Undefined	as_event	16590549	16590979	.	+	.	transcript_id "MSTRG.2476.2/MSTRG.2476.3,Os01t0391500-01"; gene_id "chr1:16588798-16597542W"; flanks "16590549^,16590979-"; structure "0,1-2^"; splice_chain ",16590872-16590902^"; sources "Undefined,Undefined"; NMorMRNA "null"; degree "4"; dimension "2_2";
chr1	Undefined	as_event	16591985	16592842	.	+	.	transcript_id "MSTRG.2476.2/Os01t0391500-01,MSTRG.2476.3"; gene_id "chr1:16588798-16597542W"; flanks "16591985-,16592842-"; structure "1^,2^"; splice_chain "16592055^,16592087^"; sources "Undefined,Undefined"; NMorMRNA "null"; degree "4"; dimension "2_2";
chr1	Undefined	as_event	16592934	16595244	.	+	.	transcript_id "MSTRG.2476.2/MSTRG.2476.3,Os01t0391500-01"; gene_id "chr1:16588798-16597542W"; flanks "16592934^,16595244-"; structure "0,1-2^"; splice_chain ",16594563-16594630^"; sources "Undefined,Undefined"; NMorMRNA "null"; degree "4"; dimension "2_2";
chr1	Undefined	as_event	16707422	16707839	.	+	.	transcript_id "MSTRG.2482.7,MSTRG.2482.10/MSTRG.2482.9"; gene_id "chr1:16693939-16709603W"; flanks "16707422-,16707839^"; structure "0,1^2-"; splice_chain ",16707519^16707708-"; sources "Undefined,Undefined"; NMorMRNA "null"; degree "4"; dimension "2_2";
chr1	Undefined	as_event	16707519	16708235	.	+	.	transcript_id "MSTRG.2482.4/MSTRG.2482.8,MSTRG.2482.10/MSTRG.2482.9"; gene_id "chr1:16693939-16709603W"; flanks "16707519^,16708235-"; structure "0,1-2^"; splice_chain ",16707708-16707839^"; sources "Undefined,Undefined"; NMorMRNA "null"; degree "4"; dimension "2_2";
chr1	Undefined	as_event	16707422	16708235	.	+	.	transcript_id "MSTRG.2482.4/MSTRG.2482.8,MSTRG.2482.10/MSTRG.2482.9,MSTRG.2482.7"; gene_id "chr1:16693939-16709603W"; flanks "16707422-,16708235-"; structure "1^,1^2-3^,3^"; splice_chain "16707519^,16707519^16707708-16707839^,16707839^"; sources "Undefined,Undefined,Undefined"; NMorMRNA "null"; degree "9"; dimension "3_3";
chr1	Undefined	as_event	16707708	16708301	.	+	.	transcript_id "MSTRG.2482.1,MSTRG.2482.10/MSTRG.2482.9"; gene_id "chr1:16693939-16709603W"; flanks "16707708-,16708301^"; structure "0,1^2-"; splice_chain ",16707839^16708235-"; sources "Undefined,Undefined"; NMorMRNA "null"; degree "4"; dimension "2_2";
chr1	Undefined	as_event	16707519	16708301	.	+	.	transcript_id "MSTRG.2482.1,MSTRG.2482.10/MSTRG.2482.9,MSTRG.2482.4/MSTRG.2482.8"; gene_id "chr1:16693939-16709603W"; flanks "16707519^,16708301^"; structure "1-,1-2^3-,3-"; splice_chain "16707708-,16707708-16707839^16708235-,16708235-"; sources "Undefined,Undefined,Undefined"; NMorMRNA "null"; degree "9"; dimension "3_3";
chr1	Undefined	as_event	16707422	16708301	.	+	.	transcript_id "MSTRG.2482.1,MSTRG.2482.10/MSTRG.2482.9,MSTRG.2482.4/MSTRG.2482.8,MSTRG.2482.7"; gene_id "chr1:16693939-16709603W"; flanks "16707422-,16708301^"; structure "1^2-,1^2-3^4-,1^4-,3^4-"; splice_chain "16707519^16707708-,16707519^16707708-16707839^16708235-,16707519^16708235-,16707839^16708235-"; sources "Undefined,Undefined,Undefined,Undefined"; NMorMRNA "null"; degree "16"; dimension …
chr1	Undefined	as_event	16707422	16708842	.	+	.	transcript_id "MSTRG.2482.3,MSTRG.2482.10"; gene_id "chr1:16693939-16709603W"; flanks "16707422-,16708842^"; structure "0,1^2-3^4-5^6-"; splice_chain ",16707519^16707708-16707839^16708235-16708301^16708783-"; sources "Undefined,Undefined"; NMorMRNA "null"; degree "4"; dimension "2_2";
chr1	Undefined	as_event	16708301	16709155	.	+	.	transcript_id "MSTRG.2482.1/MSTRG.2482.4/MSTRG.2482.7/MSTRG.2482.8/MSTRG.2482.9,MSTRG.2482.10"; gene_id "chr1:16693939-16709603W"; flanks "16708301^,16709155-"; structure "0,1-2^"; splice_chain ",16708783-16708842^"; sources "Undefined,Undefined"; NMorMRNA "null"; degree "4"; dimension "2_2";
chr1	Undefined	as_event	16707422	16709155	.	+	.	transcript_id "MSTRG.2482.9,MSTRG.2482.10,MSTRG.2482.1,MSTRG.2482.4/MSTRG.2482.8,MSTRG.2482.7,MSTRG.2482.3"; gene_id "chr1:16693939-16709603W"; flanks "16707422-,16709155-"; structure "1^2-3^4-5^,1^2-3^4-5^6-7^,1^2-5^,1^4-5^,3^4-5^,7^"; splice_chain "16707519^16707708-16707839^16708235-16708301^,16707519^16707708-16707839^16708235-16708301^16708783-16708842^,16707519^16707708-16708301^,16707519^1…
chr1	Undefined	as_event	16707708	16709603	.	+	.	transcript_id "Os01t0392800-01,MSTRG.2482.10,MSTRG.2482.9,MSTRG.2482.1"; gene_id "chr1:16693939-16709603W"; flanks "16707708-,16709603]"; structure "0,1^2-3^4-5^6-,1^2-3^6-,3^6-"; splice_chain ",16707839^16708235-16708301^16708783-16708842^16709155-,16707839^16708235-16708301^16709155-,16708301^16709155-"; sources "Undefined,Undefined,Undefined,Undefined"; NMorMRNA "null"; degree "16"; dimension …
chr1	Undefined	as_event	16707519	16709603	.	+	.	transcript_id "Os01t0392800-01,MSTRG.2482.10,MSTRG.2482.9,MSTRG.2482.1,MSTRG.2482.4/MSTRG.2482.8"; gene_id "chr1:16693939-16709603W"; flanks "16707519^,16709603]"; structure "1-,1-2^3-4^5-6^7-,1-2^3-4^7-,1-4^7-,3-4^7-"; splice_chain "16707708-,16707708-16707839^16708235-16708301^16708783-16708842^16709155-,16707708-16707839^16708235-16708301^16709155-,16707708-16708301^16709155-,16708235-16708301…
chr1	Undefined	as_event	16707422	16709603	.	+	.	transcript_id "Os01t0392800-01,MSTRG.2482.10,MSTRG.2482.9,MSTRG.2482.1,MSTRG.2482.4/MSTRG.2482.8,MSTRG.2482.7,MSTRG.2482.3"; gene_id "chr1:16693939-16709603W"; flanks "16707422-,16709603]"; structure "1^2-,1^2-3^4-5^6-7^8-,1^2-3^4-5^8-,1^2-5^8-,1^4-5^8-,3^4-5^8-,7^8-"; splice_chain "16707519^16707708-,16707519^16707708-16707839^16708235-16708301^16708783-16708842^16709155-,16707519^16707708-16707…
chr1	Undefined	as_event	16717302	16717950	.	+	.	transcript_id "MSTRG.2484.1/MSTRG.2484.2,Os01t0393000-02,Os01t0393000-01"; gene_id "chr1:16716670-16719374W"; flanks "16717302^,16717950^"; structure "1-,2-,3-"; splice_chain "16717588-,16717732-,16717750-"; sources "Undefined,Undefined,Undefined"; NMorMRNA "null"; degree "9"; dimension "3_3";
chr1	Undefined	as_event	16717220	16717950	.	+	.	transcript_id "MSTRG.2484.4,MSTRG.2484.1/MSTRG.2484.2,Os01t0393000-02,Os01t0393000-01"; gene_id "chr1:16716670-16719374W"; flanks "16717220-,16717950^"; structure "0,1^2-,1^3-,1^4-"; splice_chain ",16717302^16717588-,16717302^16717732-,16717302^16717750-"; sources "Undefined,Undefined,Undefined,Undefined"; NMorMRNA "null"; degree "16"; dimension "4_4";
chr1	Undefined	as_event	16718037	16718388	.	+	.	transcript_id "MSTRG.2484.2,Os01t0393000-01/Os01t0393000-02"; gene_id "chr1:16716670-16719374W"; flanks "16718037-,16718388^"; structure "0,1^2-"; splice_chain ",16718270^16718349-"; sources "Undefined,Undefined"; NMorMRNA "null"; degree "4"; dimension "2_2";
chr1	Undefined	as_event	16718349	16719360	.	+	.	transcript_id "MSTRG.2484.1/MSTRG.2484.4,Os01t0393000-02"; gene_id "chr1:16716670-16719374W"; flanks "16718349-,16719360]"; structure "0,1^2-"; splice_chain ",16718388^16719069-"; sources "Undefined,Undefined"; NMorMRNA "null"; degree "4"; dimension "2_2";
chr1	Undefined	as_event	16718037	16719360	.	+	.	transcript_id "MSTRG.2484.1/MSTRG.2484.4,Os01t0393000-02,MSTRG.2484.2"; gene_id "chr1:16716670-16719374W"; flanks "16718037-,16719360]"; structure "1^2-,1^2-3^4-,3^4-"; splice_chain "16718270^16718349-,16718270^16718349-16718388^16719069-,16718388^16719069-"; sources "Undefined,Undefined,Undefined"; NMorMRNA "null"; degree "9"; dimension "3_3";
chr1	Undefined	as_event	17013926	17014541	.	+	.	transcript_id "MSTRG.2500.3,MSTRG.2500.1/MSTRG.2500.2/Os01t0495900-01"; gene_id "chr1:17012671-17016236W"; flanks "17013926-,17014541^"; structure "0,1^2-"; splice_chain ",17014053^17014316-"; sources "Undefined,Undefined"; NMorMRNA "null"; degree "4"; dimension "2_2";
chr1	Undefined	as_event	17014316	17015052	.	+	.	transcript_id "MSTRG.2500.4,Os01t0495900-01"; gene_id "chr1:17012671-17016236W"; flanks "17014316-,17015052^"; structure "0,1^2-"; splice_chain ",17014541^17014925-"; sources "Undefined,Undefined"; NMorMRNA "null"; degree "4"; dimension "2_2";
chr1	Undefined	as_event	17013926	17015052	.	+	.	transcript_id "MSTRG.2500.4,Os01t0495900-01,MSTRG.2500.3"; gene_id "chr1:17012671-17016236W"; flanks "17013926-,17015052^"; structure "1^2-,1^2-3^4-,3^4-"; splice_chain "17014053^17014316-,17014053^17014316-17014541^17014925-,17014541^17014925-"; sources "Undefined,Undefined,Undefined"; NMorMRNA "null"; degree "9"; dimension "3_3";
chr1	Undefined	as_event	17014541	17015125	.	+	.	transcript_id "MSTRG.2500.1,MSTRG.2500.3/Os01t0495900-01"; gene_id "chr1:17012671-17016236W"; flanks "17014541^,17015125-"; structure "0,1-2^"; splice_chain ",17014925-17015052^"; sources "Undefined,Undefined"; NMorMRNA "null"; degree "4"; dimension "2_2";
chr1	Undefined	as_event	17014316	17015125	.	+	.	transcript_id "MSTRG.2500.1,Os01t0495900-01,MSTRG.2500.4"; gene_id "chr1:17012671-17016236W"; flanks "17014316-,17015125-"; structure "1^,1^2-3^,3^"; splice_chain "17014541^,17014541^17014925-17015052^,17015052^"; sources "Undefined,Undefined,Undefined"; NMorMRNA "null"; degree "9"; dimension "3_3";
chr1	Undefined	as_event	17013926	17015125	.	+	.	transcript_id "MSTRG.2500.1,Os01t0495900-01,MSTRG.2500.4,MSTRG.2500.3"; gene_id "chr1:17012671-17016236W"; flanks "17013926-,17015125-"; structure "1^2-3^,1^2-3^4-5^,1^2-5^,3^4-5^"; splice_chain "17014053^17014316-17014541^,17014053^17014316-17014541^17014925-17015052^,17014053^17014316-17015052^,17014541^17014925-17015052^"; sources "Undefined,Undefined,Undefined,Undefined"; NMorMRNA "null"; deg…
chr1	Undefined	as_event	17014541	17016236	.	+	.	transcript_id "MSTRG.2500.3/Os01t0495900-01,MSTRG.2500.1,MSTRG.2500.2"; gene_id "chr1:17012671-17016236W"; flanks "17014541^,17016236]"; structure "1-2^3-,3-,4-"; splice_chain "17014925-17015052^17015125-,17015125-,17015132-"; sources "Undefined,Undefined,Undefined"; NMorMRNA "null"; degree "9"; dimension "3_3";
chr1	Undefined	as_event	17014316	17016236	.	+	.	transcript_id "Os01t0495900-01,MSTRG.2500.1,MSTRG.2500.2,MSTRG.2500.4"; gene_id "chr1:17012671-17016236W"; flanks "17014316-,17016236]"; structure "1^2-3^4-,1^4-,1^5-,3^4-"; splice_chain "17014541^17014925-17015052^17015125-,17014541^17015125-,17014541^17015132-,17015052^17015125-"; sources "Undefined,Undefined,Undefined,Undefined"; NMorMRNA "null"; degree "16"; dimension "4_4";
chr1	Undefined	as_event	17013926	17016236	.	+	.	transcript_id "Os01t0495900-01,MSTRG.2500.1,MSTRG.2500.2,MSTRG.2500.4,MSTRG.2500.3"; gene_id "chr1:17012671-17016236W"; flanks "17013926-,17016236]"; structure "1^2-3^4-5^6-,1^2-3^6-,1^2-3^7-,1^2-5^6-,3^4-5^6-"; splice_chain "17014053^17014316-17014541^17014925-17015052^17015125-,17014053^17014316-17014541^17015125-,17014053^17014316-17014541^17015132-,17014053^17014316-17015052^17015125-,1701454…
chr1	Undefined	as_event	17584153	17585304	.	+	.	transcript_id "MSTRG.2560.1/MSTRG.2560.2/Os01t0505700-01,MSTRG.2560.3"; gene_id "chr1:17583102-17586287W"; flanks "17584153^,17585304^"; structure "1-,2-"; splice_chain "17585069-,17585073-"; sources "Undefined,Undefined"; NMorMRNA "null"; degree "4"; dimension "2_2";
chr1	Undefined	as_event	17711935	17713352	.	+	.	transcript_id "MSTRG.2570.2,Os01t0507500-01"; gene_id "chr1:17708828-17713352W"; flanks "17711935^,17713352]"; structure "1-,2-"; splice_chain "17712583-,17712589-"; sources "Undefined,Undefined"; NMorMRNA "null"; degree "4"; dimension "2_2";
chr1	Undefined	as_event	17751395	17752009	.	+	.	transcript_id "MSTRG.2574.1,Os01t0507900-01"; gene_id "chr1:17746363-17752009W"; flanks "17751395-,17752009]"; structure "0,1^2-"; splice_chain ",17751674^17751776-"; sources "Undefined,Undefined"; NMorMRNA "null"; degree "4"; dimension "2_2";
chr1	Undefined	as_event	17904834	17905736	.	+	.	transcript_id "MSTRG.2590.4,MSTRG.2590.1/MSTRG.2590.2/MSTRG.2590.3/Os01t0510100-01"; gene_id "chr1:17904834-17910037W"; flanks "17904834[,17905736^"; structure "0,1^2-"; splice_chain ",17905149^17905649-"; sources "Undefined,Undefined"; NMorMRNA "null"; degree "4"; dimension "2_2";
chr1	Undefined	as_event	17905736	17906223	.	+	.	transcript_id "MSTRG.2590.3/MSTRG.2590.4/Os01t0510100-01,MSTRG.2590.1/MSTRG.2590.2"; gene_id "chr1:17904834-17910037W"; flanks "17905736^,17906223^"; structure "1-,2-"; splice_chain "17906086-,17906089-"; sources "Undefined,Undefined"; NMorMRNA "null"; degree "4"; dimension "2_2";
chr1	Undefined	as_event	17907368	17909576	.	+	.	transcript_id "MSTRG.2590.3,MSTRG.2590.1/MSTRG.2590.4/Os01t0510100-01"; gene_id "chr1:17904834-17910037W"; flanks "17907368-,17909576^"; structure "0,1^2-"; splice_chain ",17907588^17909531-"; sources "Undefined,Undefined"; NMorMRNA "null"; degree "4"; dimension "2_2";
chr1	Undefined	as_event	17907249	17909576	.	+	.	transcript_id "MSTRG.2590.2,MSTRG.2590.3,MSTRG.2590.1/MSTRG.2590.4/Os01t0510100-01"; gene_id "chr1:17904834-17910037W"; flanks "17907249^,17909576^"; structure "1-,2-,2-3^4-"; splice_chain "17907344-,17907368-,17907368-17907588^17909531-"; sources "Undefined,Undefined,Undefined"; NMorMRNA "null"; degree "9"; dimension "3_3";
chr1	Undefined	as_event	18022167	18023518	.	+	.	transcript_id "Os01t0511700-01,MSTRG.2608.2"; gene_id "chr1:18021953-18026118W"; flanks "18022167[,18023518]"; structure "0,1^2-"; splice_chain ",18022391^18023205-"; sources "Undefined,Undefined"; NMorMRNA "null"; degree "4"; dimension "2_2";
chr1	Undefined	as_event	18041761	18042240	.	+	.	transcript_id "MSTRG.2611.3,Os01t0512100-01"; gene_id "chr1:18041362-18050083W"; flanks "18041761[,18042240^"; structure "0,1^2-"; splice_chain ",18041986^18042096-"; sources "Undefined,Undefined"; NMorMRNA "null"; degree "4"; dimension "2_2";
chr1	Undefined	as_event	18047667	18047850	.	+	.	transcript_id "MSTRG.2611.3,MSTRG.2611.1/Os01t0512100-01"; gene_id "chr1:18041362-18050083W"; flanks "18047667-,18047850-"; structure "1^,2^"; splice_chain "18047768^,18047775^"; sources "Undefined,Undefined"; NMorMRNA "null"; degree "4"; dimension "2_2";
chr1	Undefined	as_event	18047667	18047998	.	+	.	transcript_id "MSTRG.2611.2,MSTRG.2611.3,MSTRG.2611.1/Os01t0512100-01"; gene_id "chr1:18041362-18050083W"; flanks "18047667-,18047998^"; structure "0,1^3-,2^3-"; splice_chain ",18047768^18047850-,18047775^18047850-"; sources "Undefined,Undefined,Undefined"; NMorMRNA "null"; degree "9"; dimension "3_3";
chr1	Undefined	as_event	18125744	18127058	.	+	.	transcript_id "MSTRG.2620.2,MSTRG.2620.3"; gene_id "chr1:18124934-18129001W"; flanks "18125744^,18127058^"; structure "1-,2-"; splice_chain "18126857-,18126875-"; sources "Undefined,Undefined"; NMorMRNA "null"; degree "4"; dimension "2_2";
chr1	Undefined	as_event	18126857	18127216	.	+	.	transcript_id "Os01t0513400-01,MSTRG.2620.2"; gene_id "chr1:18124934-18129001W"; flanks "18126857-,18127216^"; structure "1^3-,2^4-"; splice_chain "18127056^18127129-,18127058^18127131-"; sources "Undefined,Undefined"; NMorMRNA "null"; degree "4"; dimension "2_2";
chr1	Undefined	as_event	18125744	18127216	.	+	.	transcript_id "Os01t0513400-01,MSTRG.2620.2,MSTRG.2620.3"; gene_id "chr1:18124934-18129001W"; flanks "18125744^,18127216^"; structure "1-3^5-,1-4^6-,2-4^6-"; splice_chain "18126857-18127056^18127129-,18126857-18127058^18127131-,18126875-18127058^18127131-"; sources "Undefined,Undefined,Undefined"; NMorMRNA "null"; degree "9"; dimension "3_3";
chr1	Undefined	as_event	18166669	18167586	.	+	.	transcript_id "MSTRG.2627.2/MSTRG.2627.4/MSTRG.2627.5/Os01t0514300-01,MSTRG.2627.3"; gene_id "chr1:18163750-18173607W"; flanks "18166669-,18167586-"; structure "1^,2^"; splice_chain "18166776^,18166878^"; sources "Undefined,Undefined"; NMorMRNA "null"; degree "4"; dimension "2_2";
chr1	Undefined	as_event	18167756	18168369	.	+	.	transcript_id "MSTRG.2627.2/MSTRG.2627.3/Os01t0514300-01,MSTRG.2627.4/MSTRG.2627.5"; gene_id "chr1:18163750-18173607W"; flanks "18167756^,18168369^"; structure "1-,2-"; splice_chain "18167836-,18167843-"; sources "Undefined,Undefined"; NMorMRNA "null"; degree "4"; dimension "2_2";
chr1	Undefined	as_event	18168465	18168615	.	+	.	transcript_id "MSTRG.2627.2/MSTRG.2627.3/MSTRG.2627.5/MSTRG.2627.6,MSTRG.2627.4/Os01t0514300-01"; gene_id "chr1:18163750-18173607W"; flanks "18168465-,18168615-"; structure "1^,2^"; splice_chain "18168534^,18168539^"; sources "Undefined,Undefined"; NMorMRNA "null"; degree "4"; dimension "2_2";
chr1	Undefined	as_event	18168940	18169229	.	+	.	transcript_id "MSTRG.2627.2/MSTRG.2627.3/MSTRG.2627.4/MSTRG.2627.5/Os01t0514300-01,MSTRG.2627.6"; gene_id "chr1:18163750-18173607W"; flanks "18168940^,18169229^"; structure "1-,2-"; splice_chain "18169020-,18169144-"; sources "Undefined,Undefined"; NMorMRNA "null"; degree "4"; dimension "2_2";
chr1	Undefined	as_event	18447510	18448539	.	+	.	transcript_id "MSTRG.2658.2,MSTRG.2658.1"; gene_id "chr1:18446993-18448858W"; flanks "18447510-,18448539-"; structure "1^,2^"; splice_chain "18447668^,18447706^"; sources "Undefined,Undefined"; NMorMRNA "null"; degree "4"; dimension "2_2";
chr1	Undefined	as_event	18447510	18448858	.	+	.	transcript_id "Os01t0519400-01,MSTRG.2658.2,MSTRG.2658.1"; gene_id "chr1:18446993-18448858W"; flanks "18447510-,18448858]"; structure "0,1^3-,2^3-"; splice_chain ",18447668^18448539-,18447706^18448539-"; sources "Undefined,Undefined,Undefined"; NMorMRNA "null"; degree "9"; dimension "3_3";
chr1	Undefined	as_event	18584847	18585611	.	+	.	transcript_id "Os01t0521200-01,MSTRG.2672.3"; gene_id "chr1:18581678-18587837W"; flanks "18584847[,18585611^"; structure "0,1^2-3^4-"; splice_chain ",18585226^18585310-18585417^18585509-"; sources "Undefined,Undefined"; NMorMRNA "null"; degree "4"; dimension "2_2";
chr1	Undefined	as_event	18586249	18586463	.	+	.	transcript_id "MSTRG.2672.1/MSTRG.2672.3,MSTRG.2672.5"; gene_id "chr1:18581678-18587837W"; flanks "18586249-,18586463-"; structure "1^,2^"; splice_chain "18586366^,18586370^"; sources "Undefined,Undefined"; NMorMRNA "null"; degree "4"; dimension "2_2";
chr1	Undefined	as_event	18585729	18586550	.	+	.	transcript_id "Os01t0521200-01,MSTRG.2672.1/MSTRG.2672.3,MSTRG.2672.5"; gene_id "chr1:18581678-18587837W"; flanks "18585729-,18586550^"; structure "0,1^2-3^5-,1^2-4^5-"; splice_chain ",18586086^18586249-18586366^18586463-,18586086^18586249-18586370^18586463-"; sources "Undefined,Undefined,Undefined"; NMorMRNA "null"; degree "9"; dimension "3_3";
chr1	Undefined	as_event	18853971	18854303	.	+	.	transcript_id "MSTRG.2715.1,Os01t0526200-01"; gene_id "chr1:18853609-18857307W"; flanks "18853971-,18854303^"; structure "0,1^2-"; splice_chain ",18854140^18854231-"; sources "Undefined,Undefined"; NMorMRNA "null"; degree "4"; dimension "2_2";
chr1	Undefined	as_event	18924950	18926824	.	+	.	transcript_id "MSTRG.2720.3/Os01t0527400-01,MSTRG.2720.2"; gene_id "chr1:18923609-18939279W"; flanks "18924950-,18926824-"; structure "1^,2^"; splice_chain "18925651^,18925663^"; sources "Undefined,Undefined"; NMorMRNA "null"; degree "4"; dimension "2_2";
chr1	Undefined	as_event	18928041	18928266	.	+	.	transcript_id "Os01t0527400-01,MSTRG.2720.2/MSTRG.2720.3"; gene_id "chr1:18923609-18939279W"; flanks "18928041^,18928266^"; structure "1-,2-"; splice_chain "18928180-,18928211-"; sources "Undefined,Undefined"; NMorMRNA "null"; degree "4"; dimension "2_2";
chr1	Undefined	as_event	18979617	18981748	.	+	.	transcript_id "MSTRG.2725.4,MSTRG.2725.1/MSTRG.2725.3/MSTRG.2725.5"; gene_id "chr1:18977424-18989685W"; flanks "18979617^,18981748-"; structure "0,1-2^"; splice_chain ",18980522-18980588^"; sources "Undefined,Undefined"; NMorMRNA "null"; degree "4"; dimension "2_2";
chr1	Undefined	as_event	18986647	18987771	.	+	.	transcript_id "MSTRG.2725.1,MSTRG.2725.3/MSTRG.2725.4/MSTRG.2725.5"; gene_id "chr1:18977424-18989685W"; flanks "18986647^,18987771^"; structure "1-,2-"; splice_chain "18987588-,18987598-"; sources "Undefined,Undefined"; NMorMRNA "null"; degree "4"; dimension "2_2";
chr1	Undefined	as_event	18988287	18988403	.	+	.	transcript_id "MSTRG.2725.1/MSTRG.2725.5,MSTRG.2725.3/MSTRG.2725.4"; gene_id "chr1:18977424-18989685W"; flanks "18988287^,18988403^"; structure "1-,2-"; splice_chain "18988367-,18988371-"; sources "Undefined,Undefined"; NMorMRNA "null"; degree "4"; dimension "2_2";
chr1	Undefined	as_event	19090041	19090234	.	+	.	transcript_id "MSTRG.2739.1/MSTRG.2739.2/MSTRG.2739.3/Os01t0530400-03,Os01t0530400-01"; gene_id "chr1:19089591-19094316W"; flanks "19090041^,19090234^"; structure "1-,2-"; splice_chain "19090159-,19090164-"; sources "Undefined,Undefined"; NMorMRNA "null"; degree "4"; dimension "2_2";
chr1	Undefined	as_event	19090159	19091309	.	+	.	transcript_id "Os01t0530400-02,MSTRG.2739.1/MSTRG.2739.2/MSTRG.2739.3/Os01t0530400-03"; gene_id "chr1:19089591-19094316W"; flanks "19090159-,19091309^"; structure "0,1^2-"; splice_chain ",19090234^19091133-"; sources "Undefined,Undefined"; NMorMRNA "null"; degree "4"; dimension "2_2";
chr1	Undefined	as_event	19090041	19091309	.	+	.	transcript_id "Os01t0530400-02,MSTRG.2739.1/MSTRG.2739.2/MSTRG.2739.3/Os01t0530400-03,Os01t0530400-01"; gene_id "chr1:19089591-19094316W"; flanks "19090041^,19091309^"; structure "1-,1-3^4-,2-3^4-"; splice_chain "19090159-,19090159-19090234^19091133-,19090164-19090234^19091133-"; sources "Undefined,Undefined,Undefined"; NMorMRNA "null"; degree "9"; dimension "3_3";
chr1	Undefined	as_event	19092205	19092462	.	+	.	transcript_id "Os01t0530400-01,MSTRG.2739.1"; gene_id "chr1:19089591-19094316W"; flanks "19092205-,19092462^"; structure "1^3-,2^4-"; splice_chain "19092279^19092383-,19092283^19092387-"; sources "Undefined,Undefined"; NMorMRNA "null"; degree "4"; dimension "2_2";
chr1	Undefined	as_event	19092205	19092480	.	+	.	transcript_id "Os01t0530400-03,MSTRG.2739.2/MSTRG.2739.3"; gene_id "chr1:19089591-19094316W"; flanks "19092205-,19092480^"; structure "1^3-,2^4-"; splice_chain "19092279^19092383-,19092283^19092387-"; sources "Undefined,Undefined"; NMorMRNA "null"; degree "4"; dimension "2_2";
chr1	Undefined	as_event	19092387	19092587	.	+	.	transcript_id "MSTRG.2739.1,MSTRG.2739.2/MSTRG.2739.3"; gene_id "chr1:19089591-19094316W"; flanks "19092387-,19092587-"; structure "1^,2^"; splice_chain "19092462^,19092480^"; sources "Undefined,Undefined"; NMorMRNA "null"; degree "4"; dimension "2_2";
chr1	Undefined	as_event	19092383	19092587	.	+	.	transcript_id "Os01t0530400-01,Os01t0530400-03"; gene_id "chr1:19089591-19094316W"; flanks "19092383-,19092587-"; structure "1^,2^"; splice_chain "19092462^,19092480^"; sources "Undefined,Undefined"; NMorMRNA "null"; degree "4"; dimension "2_2";
chr1	Undefined	as_event	19092205	19092587	.	+	.	transcript_id "Os01t0530400-01,Os01t0530400-03,MSTRG.2739.1,MSTRG.2739.2/MSTRG.2739.3"; gene_id "chr1:19089591-19094316W"; flanks "19092205-,19092587-"; structure "1^3-5^,1^3-6^,2^4-5^,2^4-6^"; splice_chain "19092279^19092383-19092462^,19092279^19092383-19092480^,19092283^19092387-19092462^,19092283^19092387-19092480^"; sources "Undefined,Undefined,Undefined,Undefined"; NMorMRNA "null"; degree "1…
chr1	Undefined	as_event	19092587	19093530	.	+	.	transcript_id "MSTRG.2739.1/MSTRG.2739.2/Os01t0530400-01/Os01t0530400-03,MSTRG.2739.3"; gene_id "chr1:19089591-19094316W"; flanks "19092587-,19093530-"; structure "1^,2^"; splice_chain "19092627^,19092937^"; sources "Undefined,Undefined"; NMorMRNA "null"; degree "4"; dimension "2_2";
chr1	Undefined	as_event	19253935	19255056	.	+	.	transcript_id "MSTRG.2758.1,Os01t0532800-01"; gene_id "chr1:19252644-19257320W"; flanks "19253935^,19255056^"; structure "1-,2-"; splice_chain "19254914-,19254917-"; sources "Undefined,Undefined"; NMorMRNA "null"; degree "4"; dimension "2_2";
chr1	Undefined	as_event	19466711	19466881	.	+	.	transcript_id "MSTRG.2776.1/MSTRG.2776.2,Os01t0535900-01"; gene_id "chr1:19466268-19469005W"; flanks "19466711^,19466881^"; structure "1-,2-"; splice_chain "19466806-,19466809-"; sources "Undefined,Undefined"; NMorMRNA "null"; degree "4"; dimension "2_2";
chr1	Undefined	as_event	19468000	19469005	.	+	.	transcript_id "MSTRG.2776.1,MSTRG.2776.2"; gene_id "chr1:19466268-19469005W"; flanks "19468000-,19469005]"; structure "0,1^2-"; splice_chain ",19468277^19468413-"; sources "Undefined,Undefined"; NMorMRNA "null"; degree "4"; dimension "2_2";
chr1	Undefined	as_event	19684288	19684529	.	+	.	transcript_id "MSTRG.2792.7,MSTRG.2792.6/Os01t0538000-01"; gene_id "chr1:19681825-19686310W"; flanks "19684288^,19684529^"; structure "1-,2-"; splice_chain "19684415-,19684450-"; sources "Undefined,Undefined"; NMorMRNA "null"; degree "4"; dimension "2_2";
chr1	Undefined	as_event	19684092	19684529	.	+	.	transcript_id "Os01t0538000-02/Os01t0538000-03/Os01t0538000-04,MSTRG.2792.7,MSTRG.2792.6/Os01t0538000-01"; gene_id "chr1:19681825-19686310W"; flanks "19684092-,19684529^"; structure "0,1^2-,1^3-"; splice_chain ",19684288^19684415-,19684288^19684450-"; sources "Undefined,Undefined,Undefined"; NMorMRNA "null"; degree "9"; dimension "3_3";
chr1	Undefined	as_event	19684288	19684600	.	+	.	transcript_id "MSTRG.2792.4,MSTRG.2792.7,MSTRG.2792.6/Os01t0538000-01"; gene_id "chr1:19681825-19686310W"; flanks "19684288^,19684600-"; structure "0,1-3^,2-3^"; splice_chain ",19684415-19684529^,19684450-19684529^"; sources "Undefined,Undefined,Undefined"; NMorMRNA "null"; degree "9"; dimension "3_3";
chr1	Undefined	as_event	19684092	19684600	.	+	.	transcript_id "MSTRG.2792.4,MSTRG.2792.7,MSTRG.2792.6/Os01t0538000-01,Os01t0538000-02/Os01t0538000-03/Os01t0538000-04"; gene_id "chr1:19681825-19686310W"; flanks "19684092-,19684600-"; structure "1^,1^2-4^,1^3-4^,4^"; splice_chain "19684288^,19684288^19684415-19684529^,19684288^19684450-19684529^,19684529^"; sources "Undefined,Undefined,Undefined,Undefined"; NMorMRNA "null"; degree "16"; dimensio…
chr1	Undefined	as_event	19684450	19684887	.	+	.	transcript_id "MSTRG.2792.5,MSTRG.2792.6/Os01t0538000-01"; gene_id "chr1:19681825-19686310W"; flanks "19684450-,19684887^"; structure "0,1^2-"; splice_chain ",19684529^19684600-"; sources "Undefined,Undefined"; NMorMRNA "null"; degree "4"; dimension "2_2";
chr1	Undefined	as_event	19684288	19684887	.	+	.	transcript_id "MSTRG.2792.8,MSTRG.2792.3,MSTRG.2792.5,MSTRG.2792.6/Os01t0538000-01,MSTRG.2792.4"; gene_id "chr1:19681825-19686310W"; flanks "19684288^,19684887^"; structure "1-,2-,3-,3-4^5-,5-"; splice_chain "19684411-,19684415-,19684450-,19684450-19684529^19684600-,19684600-"; sources "Undefined,Undefined,Undefined,Undefined,Undefined"; NMorMRNA "null"; degree "25"; dimension "5_5";
chr1	Undefined	as_event	19684092	19684887	.	+	.	transcript_id "MSTRG.2792.8,MSTRG.2792.3,MSTRG.2792.5,MSTRG.2792.6/Os01t0538000-01,MSTRG.2792.4,Os01t0538000-02/Os01t0538000-03/Os01t0538000-04"; gene_id "chr1:19681825-19686310W"; flanks "19684092-,19684887^"; structure "1^2-,1^3-,1^4-,1^4-5^6-,1^6-,5^6-"; splice_chain "19684288^19684411-,19684288^19684415-,19684288^19684450-,19684288^19684450-19684529^19684600-,19684288^19684600-,19684529^19684…
chr1	Undefined	as_event	19684600	19685893	.	+	.	transcript_id "MSTRG.2792.7,MSTRG.2792.4/MSTRG.2792.6/Os01t0538000-02"; gene_id "chr1:19681825-19686310W"; flanks "19684600-,19685893]"; structure "0,1^2-"; splice_chain ",19684887^19685603-"; sources "Undefined,Undefined"; NMorMRNA "null"; degree "4"; dimension "2_2";
chr1	Undefined	as_event	19684415	19685893	.	+	.	transcript_id "MSTRG.2792.7,MSTRG.2792.3"; gene_id "chr1:19681825-19686310W"; flanks "19684415-,19685893]"; structure "1^2-,3^4-"; splice_chain "19684529^19684600-,19684887^19685603-"; sources "Undefined,Undefined"; NMorMRNA "null"; degree "4"; dimension "2_2";
chr1	Undefined	as_event	19684288	19685893	.	+	.	transcript_id "MSTRG.2792.8,MSTRG.2792.7,MSTRG.2792.3,MSTRG.2792.6,MSTRG.2792.5,MSTRG.2792.4"; gene_id "chr1:19681825-19686310W"; flanks "19684288^,19685893]"; structure "1-6^7-,2-4^5-,2-6^7-,3-4^5-6^7-,3-6^7-,5-6^7-"; splice_chain "19684411-19684887^19685603-,19684415-19684529^19684600-,19684415-19684887^19685603-,19684450-19684529^19684600-19684887^19685603-,19684450-19684887^19685603-,19684600…
chr1	Undefined	as_event	19684092	19685893	.	+	.	transcript_id "MSTRG.2792.8,MSTRG.2792.7,MSTRG.2792.3,MSTRG.2792.6,MSTRG.2792.5,MSTRG.2792.4,Os01t0538000-02"; gene_id "chr1:19681825-19686310W"; flanks "19684092-,19685893]"; structure "1^2-7^8-,1^3-5^6-,1^3-7^8-,1^4-5^6-7^8-,1^4-7^8-,1^6-7^8-,5^6-7^8-"; splice_chain "19684288^19684411-19684887^19685603-,19684288^19684415-19684529^19684600-,19684288^19684415-19684887^19685603-,19684288^19684450-…
chr1	Undefined	as_event	19823699	19824296	.	+	.	transcript_id "MSTRG.2798.4,MSTRG.2798.5"; gene_id "chr1:19823682-19826744W"; flanks "19823699[,19824296^"; structure "0,1^2-"; splice_chain ",19824174^19824257-"; sources "Undefined,Undefined"; NMorMRNA "null"; degree "4"; dimension "2_2";
chr1	Undefined	as_event	19824174	19824815	.	+	.	transcript_id "MSTRG.2798.1,MSTRG.2798.5"; gene_id "chr1:19823682-19826744W"; flanks "19824174^,19824815-"; structure "0,1-2^"; splice_chain ",19824257-19824296^"; sources "Undefined,Undefined"; NMorMRNA "null"; degree "4"; dimension "2_2";
chr1	Undefined	as_event	19824174	19825116	.	+	.	transcript_id "MSTRG.2798.5,MSTRG.2798.2,MSTRG.2798.1"; gene_id "chr1:19823682-19826744W"; flanks "19824174^,19825116^"; structure "1-2^4-,3-,4-"; splice_chain "19824257-19824296^19824815-,19824800-,19824815-"; sources "Undefined,Undefined,Undefined"; NMorMRNA "null"; degree "9"; dimension "3_3";
chr1	Undefined	as_event	19873884	19875513	.	+	.	transcript_id "MSTRG.2804.2,MSTRG.2804.1"; gene_id "chr1:19873884-19885523W"; flanks "19873884[,19875513^"; structure "1^4-,2^3-"; splice_chain "19875291^19875508-,19875297^19875417-"; sources "Undefined,Undefined"; NMorMRNA "null"; degree "4"; dimension "2_2";
chr1	Undefined	as_event	19875297	19875834	.	+	.	transcript_id "MSTRG.2804.12/MSTRG.2804.3/MSTRG.2804.6/MSTRG.2804.9,MSTRG.2804.1/MSTRG.2804.10/MSTRG.2804.4/MSTRG.2804.5/MSTRG.2804.7/MSTRG.2804.8/Os01t0540800-01"; gene_id "chr1:19873884-19885523W"; flanks "19875297^,19875834-"; structure "0,1-2^"; splice_chain ",19875417-19875513^"; sources "Undefined,Undefined"; NMorMRNA "null"; degree "4"; dimension "2_2";
chr1	Undefined	as_event	19873884	19875834	.	+	.	transcript_id "MSTRG.2804.2,MSTRG.2804.3,MSTRG.2804.1"; gene_id "chr1:19873884-19885523W"; flanks "19873884[,19875834-"; structure "1^4-5^,2^,2^3-5^"; splice_chain "19875291^19875508-19875513^,19875297^,19875297^19875417-19875513^"; sources "Undefined,Undefined,Undefined"; NMorMRNA "null"; degree "9"; dimension "3_3";
chr1	Undefined	as_event	19875923	19876121	.	+	.	transcript_id "MSTRG.2804.2,MSTRG.2804.1/MSTRG.2804.10/MSTRG.2804.12/MSTRG.2804.3/MSTRG.2804.4/MSTRG.2804.5/MSTRG.2804.6/MSTRG.2804.7/MSTRG.2804.8/MSTRG.2804.9/Os01t0540800-01"; gene_id "chr1:19873884-19885523W"; flanks "19875923^,19876121^"; structure "1-,2-"; splice_chain "19875996-,19876012-"; sources "Undefined,Undefined"; NMorMRNA "null"; degree "4"; dimension "2_2";
chr1	Undefined	as_event	19876200	19876482	.	+	.	transcript_id "MSTRG.2804.10/MSTRG.2804.12/MSTRG.2804.2/MSTRG.2804.3/MSTRG.2804.4/MSTRG.2804.7/MSTRG.2804.8,MSTRG.2804.1/MSTRG.2804.5/MSTRG.2804.6/MSTRG.2804.9/Os01t0540800-01"; gene_id "chr1:19873884-19885523W"; flanks "19876200-,19876482^"; structure "0,1^2-"; splice_chain ",19876285^19876362-"; sources "Undefined,Undefined"; NMorMRNA "null"; degree "4"; dimension "2_2";
chr1	Undefined	as_event	19878677	19878846	.	+	.	transcript_id "MSTRG.2804.1/MSTRG.2804.3/MSTRG.2804.4/MSTRG.2804.6/MSTRG.2804.7,MSTRG.2804.10/MSTRG.2804.12/MSTRG.2804.2/MSTRG.2804.5/MSTRG.2804.8/MSTRG.2804.9/Os01t0540800-01"; gene_id "chr1:19873884-19885523W"; flanks "19878677^,19878846^"; structure "1-,2-"; splice_chain "19878745-,19878765-"; sources "Undefined,Undefined"; NMorMRNA "null"; degree "4"; dimension "2_2";
chr1	Undefined	as_event	19878846	19879755	.	+	.	transcript_id "MSTRG.2804.12/MSTRG.2804.7/MSTRG.2804.8,MSTRG.2804.1/MSTRG.2804.10/MSTRG.2804.2/MSTRG.2804.3/MSTRG.2804.4/MSTRG.2804.5/MSTRG.2804.6/MSTRG.2804.9/Os01t0540800-01"; gene_id "chr1:19873884-19885523W"; flanks "19878846^,19879755-"; structure "0,1-2^"; splice_chain ",19879231-19879320^"; sources "Undefined,Undefined"; NMorMRNA "null"; degree "4"; dimension "2_2";
chr1	Undefined	as_event	19881350	19882114	.	+	.	transcript_id "MSTRG.2804.12/MSTRG.2804.2/MSTRG.2804.5/MSTRG.2804.6/MSTRG.2804.8,MSTRG.2804.1/MSTRG.2804.10/MSTRG.2804.3/MSTRG.2804.4"; gene_id "chr1:19873884-19885523W"; flanks "19881350-,19882114^"; structure "0,1^2-"; splice_chain ",19881377^19882057-"; sources "Undefined,Undefined"; NMorMRNA "null"; degree "4"; dimension "2_2";
chr1	Undefined	as_event	19879755	19882114	.	+	.	transcript_id "MSTRG.2804.7/MSTRG.2804.9,MSTRG.2804.12/MSTRG.2804.2/MSTRG.2804.5/MSTRG.2804.6/MSTRG.2804.8,MSTRG.2804.1/MSTRG.2804.10/MSTRG.2804.3/MSTRG.2804.4"; gene_id "chr1:19873884-19885523W"; flanks "19879755-,19882114^"; structure "0,1^2-,1^2-3^4-"; splice_chain ",19880468^19881350-,19880468^19881350-19881377^19882057-"; sources "Undefined,Undefined,Undefined"; NMorMRNA "null"; degree "9"; …
chr1	Undefined	as_event	19884611	19884781	.	+	.	transcript_id "MSTRG.2804.1/MSTRG.2804.10/MSTRG.2804.12/MSTRG.2804.2/MSTRG.2804.3/MSTRG.2804.4/MSTRG.2804.5/MSTRG.2804.6/MSTRG.2804.7/MSTRG.2804.8/MSTRG.2804.9,Os01t0541000-01"; gene_id "chr1:19873884-19885523W"; flanks "19884611-,19884781-"; structure "1^,2^"; splice_chain "19884691^,19884700^"; sources "Undefined,Undefined"; NMorMRNA "null"; degree "4"; dimension "2_2";
chr1	Undefined	as_event	19885014	19885523	.	+	.	transcript_id "Os01t0541000-01,MSTRG.2804.1/MSTRG.2804.10/MSTRG.2804.12/MSTRG.2804.2/MSTRG.2804.3/MSTRG.2804.4/MSTRG.2804.5/MSTRG.2804.6/MSTRG.2804.7/MSTRG.2804.8/MSTRG.2804.9"; gene_id "chr1:19873884-19885523W"; flanks "19885014-,19885523]"; structure "0,1^2-"; splice_chain ",19885083^19885183-"; sources "Undefined,Undefined"; NMorMRNA "null"; degree "4"; dimension "2_2";
chr1	Undefined	as_event	20042808	20044529	.	+	.	transcript_id "MSTRG.2822.3,MSTRG.2822.2"; gene_id "chr1:20041617-20044804W"; flanks "20042808^,20044529-"; structure "0,1-2^"; splice_chain ",20043563-20043633^"; sources "Undefined,Undefined"; NMorMRNA "null"; degree "4"; dimension "2_2";
chr1	Undefined	as_event	20124194	20125557	.	+	.	transcript_id "MSTRG.2827.1,MSTRG.2827.2"; gene_id "chr1:20124194-20126883W"; flanks "20124194[,20125557-"; structure "1^,2^"; splice_chain "20124741^,20124916^"; sources "Undefined,Undefined"; NMorMRNA "null"; degree "4"; dimension "2_2";
chr1	Undefined	as_event	20154946	20155386	.	+	.	transcript_id "Os01t0544200-01,Os01t0544200-03"; gene_id "chr1:20153482-20156277W"; flanks "20154946-,20155386^"; structure "0,1^2-"; splice_chain ",20155081^20155207-"; sources "Undefined,Undefined"; NMorMRNA "null"; degree "4"; dimension "2_2";
chr1	Undefined	as_event	20153482	20155386	.	+	.	transcript_id "Os01t0544200-02,Os01t0544200-01"; gene_id "chr1:20153482-20156277W"; flanks "20153482[,20155386^"; structure "0,1^2-"; splice_chain ",20154015^20154946-"; sources "Undefined,Undefined"; NMorMRNA "null"; degree "4"; dimension "2_2";
chr1	Undefined	as_event	20197318	20198302	.	+	.	transcript_id "MSTRG.2838.2,MSTRG.2838.3"; gene_id "chr1:20197279-20199912W"; flanks "20197318[,20198302^"; structure "0,1^2-"; splice_chain ",20197762^20197845-"; sources "Undefined,Undefined"; NMorMRNA "null"; degree "4"; dimension "2_2";
chr1	Undefined	as_event	20197762	20198391	.	+	.	transcript_id "MSTRG.2838.4,MSTRG.2838.3"; gene_id "chr1:20197279-20199912W"; flanks "20197762^,20198391-"; structure "0,1-2^"; splice_chain ",20197845-20198302^"; sources "Undefined,Undefined"; NMorMRNA "null"; degree "4"; dimension "2_2";
chr1	Undefined	as_event	20197318	20198391	.	+	.	transcript_id "MSTRG.2838.4,MSTRG.2838.3,MSTRG.2838.2"; gene_id "chr1:20197279-20199912W"; flanks "20197318[,20198391-"; structure "1^,1^2-3^,3^"; splice_chain "20197762^,20197762^20197845-20198302^,20198302^"; sources "Undefined,Undefined,Undefined"; NMorMRNA "null"; degree "9"; dimension "3_3";
chr1	Undefined	as_event	20197845	20198518	.	+	.	transcript_id "Os01t0544700-01,MSTRG.2838.3"; gene_id "chr1:20197279-20199912W"; flanks "20197845-,20198518^"; structure "0,1^2-"; splice_chain ",20198302^20198391-"; sources "Undefined,Undefined"; NMorMRNA "null"; degree "4"; dimension "2_2";
chr1	Undefined	as_event	20197318	20198518	.	+	.	transcript_id "Os01t0544700-02,MSTRG.2838.3,MSTRG.2838.2"; gene_id "chr1:20197279-20199912W"; flanks "20197318[,20198518^"; structure "0,1^2-3^4-,3^4-"; splice_chain ",20197762^20197845-20198302^20198391-,20198302^20198391-"; sources "Undefined,Undefined,Undefined"; NMorMRNA "null"; degree "9"; dimension "3_3";
chr1	Undefined	as_event	20198391	20199817	.	+	.	transcript_id "MSTRG.2838.4,MSTRG.2838.2/MSTRG.2838.3"; gene_id "chr1:20197279-20199912W"; flanks "20198391-,20199817]"; structure "0,1^2-"; splice_chain ",20198518^20199582-"; sources "Undefined,Undefined"; NMorMRNA "null"; degree "4"; dimension "2_2";
chr1	Undefined	as_event	20197762	20199817	.	+	.	transcript_id "MSTRG.2838.3,Os01t0544700-01,MSTRG.2838.4"; gene_id "chr1:20197279-20199912W"; flanks "20197762^,20199817]"; structure "1-2^3-4^5-,1-4^5-,3-"; splice_chain "20197845-20198302^20198391-20198518^20199582-,20197845-20198518^20199582-,20198391-"; sources "Undefined,Undefined,Undefined"; NMorMRNA "null"; degree "9"; dimension "3_3";
chr1	Undefined	as_event	20332001	20333318	.	+	.	transcript_id "MSTRG.2851.3,MSTRG.2851.4/Os01t0547000-01"; gene_id "chr1:20322698-20334909W"; flanks "20332001-,20333318^"; structure "0,1^2-"; splice_chain ",20332362^20333218-"; sources "Undefined,Undefined"; NMorMRNA "null"; degree "4"; dimension "2_2";
chr1	Undefined	as_event	20332362	20333397	.	+	.	transcript_id "MSTRG.2851.7,MSTRG.2851.4/Os01t0547000-01"; gene_id "chr1:20322698-20334909W"; flanks "20332362^,20333397-"; structure "0,1-2^"; splice_chain ",20333218-20333318^"; sources "Undefined,Undefined"; NMorMRNA "null"; degree "4"; dimension "2_2";
chr1	Undefined	as_event	20332001	20333397	.	+	.	transcript_id "MSTRG.2851.7,MSTRG.2851.4/Os01t0547000-01,MSTRG.2851.3"; gene_id "chr1:20322698-20334909W"; flanks "20332001-,20333397-"; structure "1^,1^2-3^,3^"; splice_chain "20332362^,20332362^20333218-20333318^,20333318^"; sources "Undefined,Undefined,Undefined"; NMorMRNA "null"; degree "9"; dimension "3_3";
chr1	Undefined	as_event	20333218	20333504	.	+	.	transcript_id "MSTRG.2851.6,MSTRG.2851.4/Os01t0547000-01"; gene_id "chr1:20322698-20334909W"; flanks "20333218-,20333504^"; structure "0,1^2-"; splice_chain ",20333318^20333397-"; sources "Undefined,Undefined"; NMorMRNA "null"; degree "4"; dimension "2_2";
chr1	Undefined	as_event	20332362	20333504	.	+	.	transcript_id "MSTRG.2851.6,MSTRG.2851.4/Os01t0547000-01,MSTRG.2851.7"; gene_id "chr1:20322698-20334909W"; flanks "20332362^,20333504^"; structure "1-,1-2^3-,3-"; splice_chain "20333218-,20333218-20333318^20333397-,20333397-"; sources "Undefined,Undefined,Undefined"; NMorMRNA "null"; degree "9"; dimension "3_3";
chr1	Undefined	as_event	20332001	20333504	.	+	.	transcript_id "MSTRG.2851.6,MSTRG.2851.4/Os01t0547000-01,MSTRG.2851.7,MSTRG.2851.3"; gene_id "chr1:20322698-20334909W"; flanks "20332001-,20333504^"; structure "1^2-,1^2-3^4-,1^4-,3^4-"; splice_chain "20332362^20333218-,20332362^20333218-20333318^20333397-,20332362^20333397-,20333318^20333397-"; sources "Undefined,Undefined,Undefined,Undefined"; NMorMRNA "null"; degree "16"; dimension "4_4";
chr1	Undefined	as_event	20523103	20523948	.	+	.	transcript_id "MSTRG.2877.1,MSTRG.2877.4"; gene_id "chr1:20522447-20528163W"; flanks "20523103-,20523948^"; structure "0,1^2-"; splice_chain ",20523171^20523369-"; sources "Undefined,Undefined"; NMorMRNA "null"; degree "4"; dimension "2_2";
chr1	Undefined	as_event	20523171	20524094	.	+	.	transcript_id "MSTRG.2877.3/Os01t0549400-01,MSTRG.2877.4"; gene_id "chr1:20522447-20528163W"; flanks "20523171^,20524094-"; structure "0,1-2^"; splice_chain ",20523369-20523948^"; sources "Undefined,Undefined"; NMorMRNA "null"; degree "4"; dimension "2_2";
chr1	Undefined	as_event	20523103	20524094	.	+	.	transcript_id "MSTRG.2877.3/Os01t0549400-01,MSTRG.2877.4,MSTRG.2877.1"; gene_id "chr1:20522447-20528163W"; flanks "20523103-,20524094-"; structure "1^,1^2-3^,3^"; splice_chain "20523171^,20523171^20523369-20523948^,20523948^"; sources "Undefined,Undefined,Undefined"; NMorMRNA "null"; degree "9"; dimension "3_3";
chr1	Undefined	as_event	20526989	20528130	.	+	.	transcript_id "MSTRG.2877.1/Os01t0549400-02,MSTRG.2877.3/MSTRG.2877.4"; gene_id "chr1:20522447-20528163W"; flanks "20526989^,20528130]"; structure "1-,2-"; splice_chain "20527236-,20527269-"; sources "Undefined,Undefined"; NMorMRNA "null"; degree "4"; dimension "2_2";
chr1	Undefined	as_event	20541370	20543173	.	+	.	transcript_id "MSTRG.2881.4/MSTRG.2881.5,MSTRG.2881.2/MSTRG.2881.3"; gene_id "chr1:20540847-20576241W"; flanks "20541370^,20543173^"; structure "1-,2-"; splice_chain "20542876-,20543001-"; sources "Undefined,Undefined"; NMorMRNA "null"; degree "4"; dimension "2_2";
chr1	Undefined	as_event	20541270	20543173	.	+	.	transcript_id "Os01t0549700-01,MSTRG.2881.4/MSTRG.2881.5,MSTRG.2881.2/MSTRG.2881.3"; gene_id "chr1:20540847-20576241W"; flanks "20541270-,20543173^"; structure "1^4-,2^3-,2^5-"; splice_chain "20541368^20542999-,20541370^20542876-,20541370^20543001-"; sources "Undefined,Undefined,Undefined"; NMorMRNA "null"; degree "9"; dimension "3_3";
chr1	Undefined	as_event	20571480	20573013	.	+	.	transcript_id "MSTRG.2881.9,MSTRG.2881.8"; gene_id "chr1:20540847-20576241W"; flanks "20571480^,20573013^"; structure "1-,2-"; splice_chain "20572718-,20572841-"; sources "Undefined,Undefined"; NMorMRNA "null"; degree "4"; dimension "2_2";
chr1	Undefined	as_event	20571380	20573013	.	+	.	transcript_id "Os01t0550000-01,MSTRG.2881.9,MSTRG.2881.8"; gene_id "chr1:20540847-20576241W"; flanks "20571380-,20573013^"; structure "1^4-,2^3-,2^5-"; splice_chain "20571478^20572839-,20571480^20572718-,20571480^20572841-"; sources "Undefined,Undefined,Undefined"; NMorMRNA "null"; degree "9"; dimension "3_3";
chr1	Undefined	as_event	20700576	20701020	.	+	.	transcript_id "MSTRG.2894.3,MSTRG.2894.2"; gene_id "chr1:20700553-20703105W"; flanks "20700576[,20701020^"; structure "0,1^2-"; splice_chain ",20700798^20700899-"; sources "Undefined,Undefined"; NMorMRNA "null"; degree "4"; dimension "2_2";
chr1	Undefined	as_event	20701020	20703105	.	+	.	transcript_id "MSTRG.2894.3,MSTRG.2894.2"; gene_id "chr1:20700553-20703105W"; flanks "20701020^,20703105]"; structure "1-,2-"; splice_chain "20702530-,20702864-"; sources "Undefined,Undefined"; NMorMRNA "null"; degree "4"; dimension "2_2";
chr1	Undefined	as_event	20739740	20740017	.	+	.	transcript_id "MSTRG.2900.2/MSTRG.2900.3/Os01t0552300-01,MSTRG.2900.1"; gene_id "chr1:20738012-20742903W"; flanks "20739740^,20740017^"; structure "1-,2-"; splice_chain "20739904-,20739907-"; sources "Undefined,Undefined"; NMorMRNA "null"; degree "4"; dimension "2_2";
chr1	Undefined	as_event	20806069	20807044	.	+	.	transcript_id "Os01t0553400-01,MSTRG.2908.1"; gene_id "chr1:20805805-20810175W"; flanks "20806069^,20807044^"; structure "1-,2-"; splice_chain "20806887-,20806896-"; sources "Undefined,Undefined"; NMorMRNA "null"; degree "4"; dimension "2_2";
chr1	Undefined	as_event	20817049	20817269	.	+	.	transcript_id "MSTRG.2910.10/MSTRG.2910.7/MSTRG.2910.8,MSTRG.2910.6/MSTRG.2910.9"; gene_id "chr1:20816985-20820444W"; flanks "20817049[,20817269-"; structure "1^,2^"; splice_chain "20817148^,20817152^"; sources "Undefined,Undefined"; NMorMRNA "null"; degree "4"; dimension "2_2";
chr1	Undefined	as_event	20817001	20817269	.	+	.	transcript_id "MSTRG.2910.2/MSTRG.2910.4,MSTRG.2910.3/MSTRG.2910.5"; gene_id "chr1:20816985-20820444W"; flanks "20817001[,20817269-"; structure "1^,2^"; splice_chain "20817148^,20817152^"; sources "Undefined,Undefined"; NMorMRNA "null"; degree "4"; dimension "2_2";
chr1	Undefined	as_event	20817269	20817927	.	+	.	transcript_id "MSTRG.2910.10/MSTRG.2910.5/MSTRG.2910.7/MSTRG.2910.8,MSTRG.2910.11/MSTRG.2910.2/MSTRG.2910.3/MSTRG.2910.4/MSTRG.2910.6"; gene_id "chr1:20816985-20820444W"; flanks "20817269-,20817927^"; structure "0,1^2-"; splice_chain ",20817640^20817769-"; sources "Undefined,Undefined"; NMorMRNA "null"; degree "4"; dimension "2_2";
chr1	Undefined	as_event	20817927	20819907	.	+	.	transcript_id "MSTRG.2910.11/MSTRG.2910.2/MSTRG.2910.3/MSTRG.2910.5/MSTRG.2910.8,MSTRG.2910.10"; gene_id "chr1:20816985-20820444W"; flanks "20817927^,20819907-"; structure "0,1-2^"; splice_chain ",20818358-20818472^"; sources "Undefined,Undefined"; NMorMRNA "null"; degree "4"; dimension "2_2";
chr1	Undefined	as_event	20817927	20819958	.	+	.	transcript_id "MSTRG.2910.4/MSTRG.2910.6,MSTRG.2910.2/MSTRG.2910.3"; gene_id "chr1:20816985-20820444W"; flanks "20817927^,20819958^"; structure "1-,2-"; splice_chain "20818358-,20819907-"; sources "Undefined,Undefined"; NMorMRNA "null"; degree "4"; dimension "2_2";
chr1	Undefined	as_event	20817927	20819961	.	+	.	transcript_id "MSTRG.2910.7,MSTRG.2910.11"; gene_id "chr1:20816985-20820444W"; flanks "20817927^,20819961^"; structure "1-,2-"; splice_chain "20818358-,20819907-"; sources "Undefined,Undefined"; NMorMRNA "null"; degree "4"; dimension "2_2";
chr1	Undefined	as_event	20817769	20819961	.	+	.	transcript_id "MSTRG.2910.9,MSTRG.2910.11"; gene_id "chr1:20816985-20820444W"; flanks "20817769-,20819961^"; structure "0,1^2-"; splice_chain ",20817927^20819907-"; sources "Undefined,Undefined"; NMorMRNA "null"; degree "4"; dimension "2_2";
chr1	Undefined	as_event	20817269	20819961	.	+	.	transcript_id "MSTRG.2910.9,MSTRG.2910.11,MSTRG.2910.7"; gene_id "chr1:20816985-20820444W"; flanks "20817269-,20819961^"; structure "1^2-,1^2-3^5-,3^4-"; splice_chain "20817640^20817769-,20817640^20817769-20817927^20819907-,20817927^20818358-"; sources "Undefined,Undefined,Undefined"; NMorMRNA "null"; degree "9"; dimension "3_3";
chr1	Undefined	as_event	20817927	20819965	.	+	.	transcript_id "MSTRG.2910.12,MSTRG.2910.5/MSTRG.2910.8"; gene_id "chr1:20816985-20820444W"; flanks "20817927^,20819965^"; structure "1-,2-"; splice_chain "20818358-,20819907-"; sources "Undefined,Undefined"; NMorMRNA "null"; degree "4"; dimension "2_2";
chr1	Undefined	as_event	20817269	20819965	.	+	.	transcript_id "Os01t0553600-01,MSTRG.2910.5/MSTRG.2910.8"; gene_id "chr1:20816985-20820444W"; flanks "20817269-,20819965^"; structure "0,1^2-"; splice_chain ",20817927^20819907-"; sources "Undefined,Undefined"; NMorMRNA "null"; degree "4"; dimension "2_2";
chr1	Undefined	as_event	20819907	20820050	.	+	.	transcript_id "MSTRG.2910.2/MSTRG.2910.3,MSTRG.2910.11,MSTRG.2910.5/MSTRG.2910.8"; gene_id "chr1:20816985-20820444W"; flanks "20819907-,20820050-"; structure "1^,2^,3^"; splice_chain "20819958^,20819961^,20819965^"; sources "Undefined,Undefined,Undefined"; NMorMRNA "null"; degree "9"; dimension "3_3";
chr1	Undefined	as_event	20818358	20820050	.	+	.	transcript_id "MSTRG.2910.4/MSTRG.2910.6,MSTRG.2910.7,MSTRG.2910.12"; gene_id "chr1:20816985-20820444W"; flanks "20818358-,20820050-"; structure "1^,2^,3^"; splice_chain "20819958^,20819961^,20819965^"; sources "Undefined,Undefined,Undefined"; NMorMRNA "null"; degree "9"; dimension "3_3";
chr1	Undefined	as_event	20817927	20820050	.	+	.	transcript_id "MSTRG.2910.4/MSTRG.2910.6,MSTRG.2910.7,MSTRG.2910.12,MSTRG.2910.2/MSTRG.2910.3,MSTRG.2910.11,MSTRG.2910.5/MSTRG.2910.8"; gene_id "chr1:20816985-20820444W"; flanks "20817927^,20820050-"; structure "1-3^,1-4^,1-5^,2-3^,2-4^,2-5^"; splice_chain "20818358-20819958^,20818358-20819961^,20818358-20819965^,20819907-20819958^,20819907-20819961^,20819907-20819965^"; sources "Undefined,Undefi…
chr1	Undefined	as_event	20817769	20820050	.	+	.	transcript_id "MSTRG.2910.4/MSTRG.2910.6,MSTRG.2910.2/MSTRG.2910.3,MSTRG.2910.11,MSTRG.2910.9"; gene_id "chr1:20816985-20820444W"; flanks "20817769-,20820050-"; structure "1^2-4^,1^3-4^,1^3-5^,5^"; splice_chain "20817927^20818358-20819958^,20817927^20819907-20819958^,20817927^20819907-20819961^,20819961^"; sources "Undefined,Undefined,Undefined,Undefined"; NMorMRNA "null"; degree "16"; dimension …
chr1	Undefined	as_event	20817269	20820050	.	+	.	transcript_id "MSTRG.2910.4/MSTRG.2910.6,MSTRG.2910.2/MSTRG.2910.3,MSTRG.2910.11,MSTRG.2910.9,MSTRG.2910.7,MSTRG.2910.5/MSTRG.2910.8,Os01t0553600-01"; gene_id "chr1:20816985-20820444W"; flanks "20817269-,20820050-"; structure "1^2-3^4-6^,1^2-3^5-6^,1^2-3^5-7^,1^2-7^,3^4-7^,3^5-8^,8^"; splice_chain "20817640^20817769-20817927^20818358-20819958^,20817640^20817769-20817927^20819907-20819958^,2081764…
chr1	Undefined	as_event	20819907	20820444	.	+	.	transcript_id "MSTRG.2910.10,MSTRG.2910.2/MSTRG.2910.3,MSTRG.2910.11,MSTRG.2910.5/MSTRG.2910.8"; gene_id "chr1:20816985-20820444W"; flanks "20819907-,20820444]"; structure "0,1^4-,2^4-,3^4-"; splice_chain ",20819958^20820050-,20819961^20820050-,20819965^20820050-"; sources "Undefined,Undefined,Undefined,Undefined"; NMorMRNA "null"; degree "16"; dimension "4_4";
chr1	Undefined	as_event	20818358	20820444	.	+	.	transcript_id "MSTRG.2910.10,MSTRG.2910.4/MSTRG.2910.6,MSTRG.2910.7"; gene_id "chr1:20816985-20820444W"; flanks "20818358-,20820444]"; structure "1^2-,3^5-,4^5-"; splice_chain "20818472^20819907-,20819958^20820050-,20819961^20820050-"; sources "Undefined,Undefined,Undefined"; NMorMRNA "null"; degree "9"; dimension "3_3";
chr1	Undefined	as_event	20817927	20820444	.	+	.	transcript_id "MSTRG.2910.10,MSTRG.2910.4/MSTRG.2910.6,MSTRG.2910.7,MSTRG.2910.2/MSTRG.2910.3,MSTRG.2910.11,MSTRG.2910.5/MSTRG.2910.8"; gene_id "chr1:20816985-20820444W"; flanks "20817927^,20820444]"; structure "1-2^3-,1-4^7-,1-5^7-,3-4^7-,3-5^7-,3-6^7-"; splice_chain "20818358-20818472^20819907-,20818358-20819958^20820050-,20818358-20819961^20820050-,20819907-20819958^20820050-,20819907-20819961…
chr1	Undefined	as_event	20817269	20820444	.	+	.	transcript_id "MSTRG.2910.4/MSTRG.2910.6,MSTRG.2910.2/MSTRG.2910.3,MSTRG.2910.11,MSTRG.2910.9,MSTRG.2910.10,MSTRG.2910.7,MSTRG.2910.5/MSTRG.2910.8,Os01t0553600-01"; gene_id "chr1:20816985-20820444W"; flanks "20817269-,20820444]"; structure "1^2-3^4-7^10-,1^2-3^6-7^10-,1^2-3^6-8^10-,1^2-8^10-,3^4-5^6-,3^4-8^10-,3^6-9^10-,9^10-"; splice_chain "20817640^20817769-20817927^20818358-20819958^20820050-,…
chr1	Undefined	as_event	21072851	21073227	.	+	.	transcript_id "MSTRG.2943.3,MSTRG.2943.2/Os01t0557550-00"; gene_id "chr1:21070996-21074298W"; flanks "21072851-,21073227-"; structure "1^,2^"; splice_chain "21073032^,21073106^"; sources "Undefined,Undefined"; NMorMRNA "null"; degree "4"; dimension "2_2";
chr1	Undefined	as_event	21121350	21121512	.	+	.	transcript_id "MSTRG.2951.3/MSTRG.2951.6,Os01t0558200-01"; gene_id "chr1:21118894-21124700W"; flanks "21121350-,21121512-"; structure "1^,2^"; splice_chain "21121431^,21121436^"; sources "Undefined,Undefined"; NMorMRNA "null"; degree "4"; dimension "2_2";
chr1	Undefined	as_event	21121350	21121571	.	+	.	transcript_id "MSTRG.2951.2/MSTRG.2951.4/MSTRG.2951.5,MSTRG.2951.3/MSTRG.2951.6,Os01t0558200-01"; gene_id "chr1:21118894-21124700W"; flanks "21121350-,21121571^"; structure "0,1^3-,2^3-"; splice_chain ",21121431^21121512-,21121436^21121512-"; sources "Undefined,Undefined,Undefined"; NMorMRNA "null"; degree "9"; dimension "3_3";
chr1	Undefined	as_event	21123317	21123483	.	+	.	transcript_id "MSTRG.2951.2/MSTRG.2951.5/MSTRG.2951.6/Os01t0558200-01,MSTRG.2951.3/MSTRG.2951.4"; gene_id "chr1:21118894-21124700W"; flanks "21123317-,21123483-"; structure "1^,2^"; splice_chain "21123407^,21123411^"; sources "Undefined,Undefined"; NMorMRNA "null"; degree "4"; dimension "2_2";
chr1	Undefined	as_event	21159954	21160318	.	+	.	transcript_id "MSTRG.2958.2/Os01t0558850-00,MSTRG.2958.3"; gene_id "chr1:21158719-21172622W"; flanks "21159954^,21160318^"; structure "1-,2-"; splice_chain "21160181-,21160188-"; sources "Undefined,Undefined"; NMorMRNA "null"; degree "4"; dimension "2_2";
chr1	Undefined	as_event	21161431	21161982	.	+	.	transcript_id "MSTRG.2958.3,MSTRG.2958.2/Os01t0558850-00"; gene_id "chr1:21158719-21172622W"; flanks "21161431^,21161982^"; structure "1-,2-"; splice_chain "21161567-,21161913-"; sources "Undefined,Undefined"; NMorMRNA "null"; degree "4"; dimension "2_2";
chr1	Undefined	as_event	21168465	21170583	.	+	.	transcript_id "MSTRG.2958.7,MSTRG.2958.2/Os01t0559000-01"; gene_id "chr1:21158719-21172622W"; flanks "21168465^,21170583-"; structure "0,1-2^"; splice_chain ",21169561-21169610^"; sources "Undefined,Undefined"; NMorMRNA "null"; degree "4"; dimension "2_2";
chr1	Undefined	as_event	21169561	21170660	.	+	.	transcript_id "Os01t0559000-02,MSTRG.2958.2/Os01t0559000-01"; gene_id "chr1:21158719-21172622W"; flanks "21169561-,21170660^"; structure "0,1^2-"; splice_chain ",21169610^21170583-"; sources "Undefined,Undefined"; NMorMRNA "null"; degree "4"; dimension "2_2";
chr1	Undefined	as_event	21168465	21170660	.	+	.	transcript_id "Os01t0559000-02,MSTRG.2958.2/Os01t0559000-01,MSTRG.2958.7"; gene_id "chr1:21158719-21172622W"; flanks "21168465^,21170660^"; structure "1-,1-2^3-,3-"; splice_chain "21169561-,21169561-21169610^21170583-,21170583-"; sources "Undefined,Undefined,Undefined"; NMorMRNA "null"; degree "9"; dimension "3_3";
chr1	Undefined	as_event	21176382	21176543	.	+	.	transcript_id "MSTRG.2959.1/MSTRG.2959.2/Os01t0559100-02,Os01t0559100-01"; gene_id "chr1:21175768-21179958W"; flanks "21176382-,21176543^"; structure "0,1^2-"; splice_chain ",21176412^21176473-"; sources "Undefined,Undefined"; NMorMRNA "null"; degree "4"; dimension "2_2";
chr1	Undefined	as_event	21176885	21178132	.	+	.	transcript_id "MSTRG.2959.1/Os01t0559100-01/Os01t0559100-02,MSTRG.2959.2"; gene_id "chr1:21175768-21179958W"; flanks "21176885-,21178132-"; structure "1^,2^"; splice_chain "21176990^,21176997^"; sources "Undefined,Undefined"; NMorMRNA "null"; degree "4"; dimension "2_2";
chr1	Undefined	as_event	21178132	21178680	.	+	.	transcript_id "Os01t0559100-01/Os01t0559100-02,MSTRG.2959.1/MSTRG.2959.2"; gene_id "chr1:21175768-21179958W"; flanks "21178132-,21178680^"; structure "1^3-,2^4-"; splice_chain "21178323^21178575-,21178325^21178577-"; sources "Undefined,Undefined"; NMorMRNA "null"; degree "4"; dimension "2_2";
chr1	Undefined	as_event	21179035	21179514	.	+	.	transcript_id "Os01t0559100-02,MSTRG.2959.1/MSTRG.2959.2/Os01t0559100-01"; gene_id "chr1:21175768-21179958W"; flanks "21179035-,21179514^"; structure "0,1^2-"; splice_chain ",21179214^21179298-"; sources "Undefined,Undefined"; NMorMRNA "null"; degree "4"; dimension "2_2";
chr1	Undefined	as_event	21182530	21183078	.	+	.	transcript_id "Os01t0559200-01,MSTRG.2961.1"; gene_id "chr1:21181447-21184010W"; flanks "21182530^,21183078-"; structure "0,1-2^"; splice_chain ",21182758-21182864^"; sources "Undefined,Undefined"; NMorMRNA "null"; degree "4"; dimension "2_2";
chr1	Undefined	as_event	21184950	21185257	.	+	.	transcript_id "MSTRG.2962.2,Os01t0559300-01"; gene_id "chr1:21184950-21187424W"; flanks "21184950[,21185257^"; structure "0,1^2-"; splice_chain ",21185112^21185196-"; sources "Undefined,Undefined"; NMorMRNA "null"; degree "4"; dimension "2_2";
chr1	Undefined	as_event	21185196	21185478	.	+	.	transcript_id "MSTRG.2962.1,Os01t0559300-01"; gene_id "chr1:21184950-21187424W"; flanks "21185196-,21185478^"; structure "0,1^2-"; splice_chain ",21185257^21185395-"; sources "Undefined,Undefined"; NMorMRNA "null"; degree "4"; dimension "2_2";
chr1	Undefined	as_event	21184950	21185478	.	+	.	transcript_id "MSTRG.2962.1,Os01t0559300-01,MSTRG.2962.2"; gene_id "chr1:21184950-21187424W"; flanks "21184950[,21185478^"; structure "1^2-,1^2-3^4-,3^4-"; splice_chain "21185112^21185196-,21185112^21185196-21185257^21185395-,21185257^21185395-"; sources "Undefined,Undefined,Undefined"; NMorMRNA "null"; degree "9"; dimension "3_3";
chr1	Undefined	as_event	21196312	21196710	.	+	.	transcript_id "MSTRG.2964.1/MSTRG.2964.2/MSTRG.2964.4/MSTRG.2964.5/MSTRG.2964.6/Os01t0559500-01,MSTRG.2964.3/MSTRG.2964.7/MSTRG.2964.8"; gene_id "chr1:21195400-21203369W"; flanks "21196312^,21196710^"; structure "1-,2-"; splice_chain "21196408-,21196492-"; sources "Undefined,Undefined"; NMorMRNA "null"; degree "4"; dimension "2_2";
chr1	Undefined	as_event	21201085	21201321	.	+	.	transcript_id "MSTRG.2964.1/MSTRG.2964.3/MSTRG.2964.6,MSTRG.2964.2/MSTRG.2964.4/MSTRG.2964.7/MSTRG.2964.8"; gene_id "chr1:21195400-21203369W"; flanks "21201085^,21201321^"; structure "1-,2-"; splice_chain "21201230-,21201234-"; sources "Undefined,Undefined"; NMorMRNA "null"; degree "4"; dimension "2_2";
chr1	Undefined	as_event	21200976	21201321	.	+	.	transcript_id "MSTRG.2964.1/MSTRG.2964.3/MSTRG.2964.6,MSTRG.2964.2/MSTRG.2964.4/MSTRG.2964.7/MSTRG.2964.8,MSTRG.2964.5"; gene_id "chr1:21195400-21203369W"; flanks "21200976^,21201321^"; structure "1-2^4-,1-2^5-,3-"; splice_chain "21201067-21201085^21201230-,21201067-21201085^21201234-,21201123-"; sources "Undefined,Undefined,Undefined"; NMorMRNA "null"; degree "9"; dimension "3_3";
chr1	Undefined	as_event	21201321	21202664	.	+	.	transcript_id "MSTRG.2964.3/MSTRG.2964.4/MSTRG.2964.5/MSTRG.2964.6/MSTRG.2964.7,MSTRG.2964.1/MSTRG.2964.2"; gene_id "chr1:21195400-21203369W"; flanks "21201321^,21202664-"; structure "0,1-2^"; splice_chain ",21201392-21201573^"; sources "Undefined,Undefined"; NMorMRNA "null"; degree "4"; dimension "2_2";
chr1	Undefined	as_event	21201392	21203369	.	+	.	transcript_id "MSTRG.2964.8,MSTRG.2964.1"; gene_id "chr1:21195400-21203369W"; flanks "21201392-,21203369]"; structure "0,1^2-"; splice_chain ",21201573^21202664-"; sources "Undefined,Undefined"; NMorMRNA "null"; degree "4"; dimension "2_2";
chr1	Undefined	as_event	21201321	21203369	.	+	.	transcript_id "MSTRG.2964.8,MSTRG.2964.1,MSTRG.2964.4"; gene_id "chr1:21195400-21203369W"; flanks "21201321^,21203369]"; structure "1-,1-2^3-,3-"; splice_chain "21201392-,21201392-21201573^21202664-,21202664-"; sources "Undefined,Undefined,Undefined"; NMorMRNA "null"; degree "9"; dimension "3_3";
chr1	Undefined	as_event	21415161	21415515	.	+	.	transcript_id "MSTRG.2992.4/MSTRG.2992.6/Os01t0563000-01/Os01t0563000-02/Os01t0563000-03,MSTRG.2992.1/MSTRG.2992.5"; gene_id "chr1:21413955-21441440W"; flanks "21415161^,21415515^"; structure "1-,2-"; splice_chain "21415237-,21415240-"; sources "Undefined,Undefined"; NMorMRNA "null"; degree "4"; dimension "2_2";
chr1	Undefined	as_event	21426007	21431623	.	+	.	transcript_id "MSTRG.2992.1/MSTRG.2992.4/Os01t0563000-01/Os01t0563000-02/Os01t0563000-04,MSTRG.2992.5"; gene_id "chr1:21413955-21441440W"; flanks "21426007-,21431623-"; structure "1^,2^"; splice_chain "21426198^,21426929^"; sources "Undefined,Undefined"; NMorMRNA "null"; degree "4"; dimension "2_2";
chr1	Undefined	as_event	21431817	21433005	.	+	.	transcript_id "MSTRG.2992.1/MSTRG.2992.4/MSTRG.2992.5/Os01t0563000-04/Os01t0563000-05,Os01t0563000-02"; gene_id "chr1:21413955-21441440W"; flanks "21431817-,21433005-"; structure "1^,2^"; splice_chain "21431995^,21432020^"; sources "Undefined,Undefined"; NMorMRNA "null"; degree "4"; dimension "2_2";
chr1	Undefined	as_event	21426198	21433005	.	+	.	transcript_id "MSTRG.2992.6,MSTRG.2992.1/MSTRG.2992.4/Os01t0563000-04,Os01t0563000-02"; gene_id "chr1:21413955-21441440W"; flanks "21426198^,21433005-"; structure "0,1-2^3-4^,1-2^3-5^"; splice_chain ",21431623-21431712^21431817-21431995^,21431623-21431712^21431817-21432020^"; sources "Undefined,Undefined,Undefined"; NMorMRNA "null"; degree "9"; dimension "3_3";
chr1	Undefined	as_event	21426007	21433005	.	+	.	transcript_id "MSTRG.2992.6,MSTRG.2992.1/MSTRG.2992.4/Os01t0563000-04,Os01t0563000-02,MSTRG.2992.5"; gene_id "chr1:21413955-21441440W"; flanks "21426007-,21433005-"; structure "1^,1^3-4^5-6^,1^3-4^5-7^,2^3-4^5-6^"; splice_chain "21426198^,21426198^21431623-21431712^21431817-21431995^,21426198^21431623-21431712^21431817-21432020^,21426929^21431623-21431712^21431817-21431995^"; sources "Undefined,U…
chr1	Undefined	as_event	21433005	21433322	.	+	.	transcript_id "MSTRG.2992.1/MSTRG.2992.4/MSTRG.2992.5/Os01t0563000-02/Os01t0563000-04/Os01t0563000-05,MSTRG.2992.6"; gene_id "chr1:21413955-21441440W"; flanks "21433005-,21433322^"; structure "0,1^2-"; splice_chain ",21433163^21433230-"; sources "Undefined,Undefined"; NMorMRNA "null"; degree "4"; dimension "2_2";
chr1	Undefined	as_event	21431817	21441440	.	+	.	transcript_id "Os01t0563000-01,MSTRG.2992.5/Os01t0563000-05,Os01t0563000-02"; gene_id "chr1:21413955-21441440W"; flanks "21431817-,21441440]"; structure "1^9-,2^4-5^6-7^8-,3^4-5^6-7^8-"; splice_chain "21431923^21441102-,21431995^21433005-21433322^21438195-21438305^21440964-,21432020^21433005-21433322^21438195-21438305^21440964-"; sources "Undefined,Undefined,Undefined"; NMorMRNA "null"; degree "9…
chr1	Undefined	as_event	21545802	21545982	.	+	.	transcript_id "Os01t0564300-01,MSTRG.3003.1"; gene_id "chr1:21525509-21549819W"; flanks "21545802^,21545982^"; structure "1-,2-"; splice_chain "21545902-,21545917-"; sources "Undefined,Undefined"; NMorMRNA "null"; degree "4"; dimension "2_2";
chr1	Undefined	as_event	21879146	21879500	.	+	.	transcript_id "MSTRG.3046.3,Os01t0570500-03"; gene_id "chr1:21878990-21883943W"; flanks "21879146[,21879500^"; structure "0,1^2-"; splice_chain ",21879341^21879460-"; sources "Undefined,Undefined"; NMorMRNA "null"; degree "4"; dimension "2_2";
chr1	Undefined	as_event	21880753	21881157	.	+	.	transcript_id "Os01t0570500-03,MSTRG.3046.3/Os01t0570500-01/Os01t0570500-02"; gene_id "chr1:21878990-21883943W"; flanks "21880753-,21881157^"; structure "0,1^2-"; splice_chain ",21880823^21881096-"; sources "Undefined,Undefined"; NMorMRNA "null"; degree "4"; dimension "2_2";
chr1	Undefined	as_event	21881298	21881521	.	+	.	transcript_id "MSTRG.3046.5,Os01t0570500-04"; gene_id "chr1:21878990-21883943W"; flanks "21881298[,21881521^"; structure "0,1^2-"; splice_chain ",21881353^21881437-"; sources "Undefined,Undefined"; NMorMRNA "null"; degree "4"; dimension "2_2";
chr1	Undefined	as_event	21881969	21883604	.	+	.	transcript_id "Os01t0570500-03,Os01t0570500-01"; gene_id "chr1:21878990-21883943W"; flanks "21881969-,21883604]"; structure "0,1^2-3^4-"; splice_chain ",21882029^21882895-21883034^21883156-"; sources "Undefined,Undefined"; NMorMRNA "null"; degree "4"; dimension "2_2";
chr1	Undefined	as_event	21956855	21957518	.	+	.	transcript_id "MSTRG.3063.7,MSTRG.3063.2/MSTRG.3063.4/MSTRG.3063.5"; gene_id "chr1:21956101-21963333W"; flanks "21956855-,21957518-"; structure "1^,2^"; splice_chain "21956910^,21957015^"; sources "Undefined,Undefined"; NMorMRNA "null"; degree "4"; dimension "2_2";
chr1	Undefined	as_event	21956855	21957643	.	+	.	transcript_id "MSTRG.3063.1/MSTRG.3063.3/MSTRG.3063.8/Os01t0571700-01,MSTRG.3063.7,MSTRG.3063.2/MSTRG.3063.4/MSTRG.3063.5"; gene_id "chr1:21956101-21963333W"; flanks "21956855-,21957643^"; structure "0,1^3-,2^3-"; splice_chain ",21956910^21957518-,21957015^21957518-"; sources "Undefined,Undefined,Undefined"; NMorMRNA "null"; degree "9"; dimension "3_3";
chr1	Undefined	as_event	21956498	21957643	.	+	.	transcript_id "MSTRG.3063.1/MSTRG.3063.3/MSTRG.3063.8/Os01t0571700-01,MSTRG.3063.7,MSTRG.3063.2/MSTRG.3063.4/MSTRG.3063.5,MSTRG.3063.6"; gene_id "chr1:21956101-21963333W"; flanks "21956498^,21957643^"; structure "1-,1-2^5-,1-4^5-,3-"; splice_chain "21956855-,21956855-21956910^21957518-,21956855-21957015^21957518-,21956987-"; sources "Undefined,Undefined,Undefined,Undefined"; NMorMRNA "null"; degr…
chr1	Undefined	as_event	21958127	21958451	.	+	.	transcript_id "MSTRG.3063.1/MSTRG.3063.2/MSTRG.3063.4/MSTRG.3063.6/MSTRG.3063.7/MSTRG.3063.8/Os01t0571700-01,MSTRG.3063.3/MSTRG.3063.5"; gene_id "chr1:21956101-21963333W"; flanks "21958127-,21958451-"; structure "1^,2^"; splice_chain "21958180^,21958186^"; sources "Undefined,Undefined"; NMorMRNA "null"; degree "4"; dimension "2_2";
chr1	Undefined	as_event	21958451	21958696	.	+	.	transcript_id "MSTRG.3063.5/MSTRG.3063.8,Os01t0571700-01,MSTRG.3063.1/MSTRG.3063.2/MSTRG.3063.3/MSTRG.3063.4/MSTRG.3063.6/MSTRG.3063.7"; gene_id "chr1:21956101-21963333W"; flanks "21958451-,21958696-"; structure "1^,2^,3^"; splice_chain "21958510^,21958538^,21958585^"; sources "Undefined,Undefined,Undefined"; NMorMRNA "null"; degree "9"; dimension "3_3";
chr1	Undefined	as_event	21962417	21962823	.	+	.	transcript_id "MSTRG.3063.4/MSTRG.3063.5,MSTRG.3063.1/MSTRG.3063.10/MSTRG.3063.2/MSTRG.3063.3/MSTRG.3063.6/MSTRG.3063.7/MSTRG.3063.8/Os01t0571700-01"; gene_id "chr1:21956101-21963333W"; flanks "21962417^,21962823^"; structure "1-,2-"; splice_chain "21962659-,21962662-"; sources "Undefined,Undefined"; NMorMRNA "null"; degree "4"; dimension "2_2";
chr1	Undefined	as_event	21962896	21963333	.	+	.	transcript_id "MSTRG.3063.1/MSTRG.3063.2/MSTRG.3063.3/MSTRG.3063.5/MSTRG.3063.6/MSTRG.3063.7/MSTRG.3063.8/Os01t0571700-01,MSTRG.3063.10/MSTRG.3063.4"; gene_id "chr1:21956101-21963333W"; flanks "21962896-,21963333]"; structure "0,1^2-"; splice_chain ",21962977^21963067-"; sources "Undefined,Undefined"; NMorMRNA "null"; degree "4"; dimension "2_2";
chr1	Undefined	as_event	21980412	21980743	.	+	.	transcript_id "Os01t0572100-01,MSTRG.3067.1"; gene_id "chr1:21976583-21981779W"; flanks "21980412-,21980743-"; structure "1^,2^"; splice_chain "21980539^,21980569^"; sources "Undefined,Undefined"; NMorMRNA "null"; degree "4"; dimension "2_2";
chr1	Undefined	as_event	22121756	22122046	.	+	.	transcript_id "Os01t0575000-01/Os01t0575000-02,MSTRG.3095.1"; gene_id "chr1:22120312-22128715W"; flanks "22121756-,22122046^"; structure "1^3-,2^4-"; splice_chain "22121820^22121942-,22121822^22121944-"; sources "Undefined,Undefined"; NMorMRNA "null"; degree "4"; dimension "2_2";
chr1	Undefined	as_event	22375575	22376719	.	+	.	transcript_id "MSTRG.3121.1,Os01t0578500-01"; gene_id "chr1:22375575-22377307W"; flanks "22375575[,22376719^"; structure "0,1^2-"; splice_chain ",22376489^22376576-"; sources "Undefined,Undefined"; NMorMRNA "null"; degree "4"; dimension "2_2";
chr1	Undefined	as_event	22379488	22380545	.	+	.	transcript_id "Os01t0578700-01,MSTRG.3122.2/MSTRG.3122.3/MSTRG.3122.4/Os01t0578700-02/Os01t0578700-03"; gene_id "chr1:22379059-22383178W"; flanks "22379488-,22380545^"; structure "1^3-,2^4-"; splice_chain "22379557^22380448-,22379559^22380450-"; sources "Undefined,Undefined"; NMorMRNA "null"; degree "4"; dimension "2_2";
chr1	Undefined	as_event	22380713	22380909	.	+	.	transcript_id "MSTRG.3122.3/MSTRG.3122.4/Os01t0578700-02/Os01t0578700-03,Os01t0578700-01"; gene_id "chr1:22379059-22383178W"; flanks "22380713^,22380909^"; structure "1-,2-"; splice_chain "22380797-,22380806-"; sources "Undefined,Undefined"; NMorMRNA "null"; degree "4"; dimension "2_2";
chr1	Undefined	as_event	22380909	22381315	.	+	.	transcript_id "Os01t0578700-03,MSTRG.3122.3"; gene_id "chr1:22379059-22383178W"; flanks "22380909^,22381315^"; structure "1-,2-"; splice_chain "22381236-,22381267-"; sources "Undefined,Undefined"; NMorMRNA "null"; degree "4"; dimension "2_2";
chr1	Undefined	as_event	22380797	22381315	.	+	.	transcript_id "MSTRG.3122.2,Os01t0578700-03,MSTRG.3122.3"; gene_id "chr1:22379059-22383178W"; flanks "22380797-,22381315^"; structure "0,1^2-,1^3-"; splice_chain ",22380909^22381236-,22380909^22381267-"; sources "Undefined,Undefined,Undefined"; NMorMRNA "null"; degree "9"; dimension "3_3";
chr1	Undefined	as_event	22380909	22382464	.	+	.	transcript_id "MSTRG.3122.4/Os01t0578700-01/Os01t0578700-02,Os01t0578700-03,MSTRG.3122.3"; gene_id "chr1:22379059-22383178W"; flanks "22380909^,22382464-"; structure "0,1-3^,2-3^"; splice_chain ",22381236-22381315^,22381267-22381315^"; sources "Undefined,Undefined,Undefined"; NMorMRNA "null"; degree "9"; dimension "3_3";
chr1	Undefined	as_event	22380797	22382464	.	+	.	transcript_id "MSTRG.3122.4/Os01t0578700-02,Os01t0578700-03,MSTRG.3122.3,MSTRG.3122.2"; gene_id "chr1:22379059-22383178W"; flanks "22380797-,22382464-"; structure "1^,1^2-4^,1^3-4^,4^"; splice_chain "22380909^,22380909^22381236-22381315^,22380909^22381267-22381315^,22381315^"; sources "Undefined,Undefined,Undefined,Undefined"; NMorMRNA "null"; degree "16"; dimension "4_4";
chr1	Undefined	as_event	22380713	22382464	.	+	.	transcript_id "MSTRG.3122.4/Os01t0578700-02,Os01t0578700-03,MSTRG.3122.3,MSTRG.3122.2,Os01t0578700-01"; gene_id "chr1:22379059-22383178W"; flanks "22380713^,22382464-"; structure "1-3^,1-3^4-6^,1-3^5-6^,1-6^,2-3^"; splice_chain "22380797-22380909^,22380797-22380909^22381236-22381315^,22380797-22380909^22381267-22381315^,22380797-22381315^,22380806-22380909^"; sources "Undefined,Undefined,Undefine…
chr1	Undefined	as_event	22427929	22428305	.	+	.	transcript_id "MSTRG.3132.1/Os01t0579600-01,MSTRG.3132.4"; gene_id "chr1:22427835-22430779W"; flanks "22427929^,22428305^"; structure "1-,2-"; splice_chain "22428029-,22428211-"; sources "Undefined,Undefined"; NMorMRNA "null"; degree "4"; dimension "2_2";
chr1	Undefined	as_event	22428430	22429327	.	+	.	transcript_id "MSTRG.3132.4,MSTRG.3132.1/MSTRG.3132.5/Os01t0579600-01"; gene_id "chr1:22427835-22430779W"; flanks "22428430-,22429327^"; structure "0,1^2-"; splice_chain ",22428512^22429268-"; sources "Undefined,Undefined"; NMorMRNA "null"; degree "4"; dimension "2_2";
chr1	Undefined	as_event	22429500	22429747	.	+	.	transcript_id "MSTRG.3132.4,MSTRG.3132.1/MSTRG.3132.5"; gene_id "chr1:22427835-22430779W"; flanks "22429500-,22429747^"; structure "0,1^2-"; splice_chain ",22429608^22429695-"; sources "Undefined,Undefined"; NMorMRNA "null"; degree "4"; dimension "2_2";
chr1	Undefined	as_event	22429500	22429923	.	+	.	transcript_id "Os01t0579600-01,MSTRG.3132.1/MSTRG.3132.5,MSTRG.3132.4"; gene_id "chr1:22427835-22430779W"; flanks "22429500-,22429923^"; structure "0,1^2-3^4-,3^4-"; splice_chain ",22429608^22429695-22429747^22429843-,22429747^22429843-"; sources "Undefined,Undefined,Undefined"; NMorMRNA "null"; degree "9"; dimension "3_3";
chr1	Undefined	as_event	22469678	22470294	.	+	.	transcript_id "MSTRG.3139.3,Os01t0580200-01"; gene_id "chr1:22466601-22472572W"; flanks "22469678-,22470294^"; structure "0,1^2-"; splice_chain ",22469842^22470125-"; sources "Undefined,Undefined"; NMorMRNA "null"; degree "4"; dimension "2_2";
chr1	Undefined	as_event	22769785	22770238	.	+	.	transcript_id "MSTRG.3183.1/MSTRG.3183.3,Os01t0585600-01/Os01t0585600-02"; gene_id "chr1:22767949-22772615W"; flanks "22769785^,22770238^"; structure "1-,2-"; splice_chain "22770054-,22770060-"; sources "Undefined,Undefined"; NMorMRNA "null"; degree "4"; dimension "2_2";
chr1	Undefined	as_event	22771638	22772569	.	+	.	transcript_id "Os01t0585600-01,MSTRG.3183.3"; gene_id "chr1:22767949-22772615W"; flanks "22771638^,22772569]"; structure "1-,2-"; splice_chain "22771857-,22771861-"; sources "Undefined,Undefined"; NMorMRNA "null"; degree "4"; dimension "2_2";
chr1	Undefined	as_event	22779163	22780108	.	+	.	transcript_id "MSTRG.3185.3,MSTRG.3185.1/MSTRG.3185.2/Os01t0585700-01"; gene_id "chr1:22774845-22782682W"; flanks "22779163^,22780108^"; structure "1-,2-"; splice_chain "22779340-,22780005-"; sources "Undefined,Undefined"; NMorMRNA "null"; degree "4"; dimension "2_2";
chr1	Undefined	as_event	22781546	22782682	.	+	.	transcript_id "MSTRG.3185.2/MSTRG.3185.3,MSTRG.3185.1/Os01t0585700-01"; gene_id "chr1:22774845-22782682W"; flanks "22781546^,22782682]"; structure "1-,2-"; splice_chain "22781628-,22781631-"; sources "Undefined,Undefined"; NMorMRNA "null"; degree "4"; dimension "2_2";
chr1	Undefined	as_event	22948644	22948888	.	+	.	transcript_id "MSTRG.3208.5,MSTRG.3208.1/MSTRG.3208.2/MSTRG.3208.4/Os01t0588800-01"; gene_id "chr1:22948164-22953269W"; flanks "22948644^,22948888^"; structure "1-,2-"; splice_chain "22948740-,22948745-"; sources "Undefined,Undefined"; NMorMRNA "null"; degree "4"; dimension "2_2";
chr1	Undefined	as_event	22949286	22950343	.	+	.	transcript_id "MSTRG.3208.1/MSTRG.3208.4/MSTRG.3208.5,MSTRG.3208.2/Os01t0588800-01"; gene_id "chr1:22948164-22953269W"; flanks "22949286-,22950343-"; structure "1^,2^"; splice_chain "22949468^,22949481^"; sources "Undefined,Undefined"; NMorMRNA "null"; degree "4"; dimension "2_2";
chr1	Undefined	as_event	22950555	22950847	.	+	.	transcript_id "MSTRG.3208.6/Os01t0588800-01,MSTRG.3208.1/MSTRG.3208.4"; gene_id "chr1:22948164-22953269W"; flanks "22950555^,22950847^"; structure "1-,2-"; splice_chain "22950625-,22950650-"; sources "Undefined,Undefined"; NMorMRNA "null"; degree "4"; dimension "2_2";
chr1	Undefined	as_event	22950503	22950847	.	+	.	transcript_id "MSTRG.3208.2/MSTRG.3208.5,Os01t0588800-01,MSTRG.3208.1/MSTRG.3208.4"; gene_id "chr1:22948164-22953269W"; flanks "22950503-,22950847^"; structure "0,1^2-,1^3-"; splice_chain ",22950555^22950625-,22950555^22950650-"; sources "Undefined,Undefined,Undefined"; NMorMRNA "null"; degree "9"; dimension "3_3";
chr1	Undefined	as_event	22951320	22952187	.	+	.	transcript_id "MSTRG.3208.1/MSTRG.3208.2/Os01t0588800-01,MSTRG.3208.4/MSTRG.3208.6"; gene_id "chr1:22948164-22953269W"; flanks "22951320-,22952187]"; structure "0,1^2-"; splice_chain ",22951618^22951836-"; sources "Undefined,Undefined"; NMorMRNA "null"; degree "4"; dimension "2_2";
chr1	Undefined	as_event	22986666	22987381	.	+	.	transcript_id "Os01t0589200-00,MSTRG.3216.1"; gene_id "chr1:22986666-22991939W"; flanks "22986666[,22987381^"; structure "0,1^2-"; splice_chain ",22986930^22987035-"; sources "Undefined,Undefined"; NMorMRNA "null"; degree "4"; dimension "2_2";
chr1	Undefined	as_event	22991003	22991922	.	+	.	transcript_id "MSTRG.3216.5,MSTRG.3216.2/Os01t0589300-01"; gene_id "chr1:22986666-22991939W"; flanks "22991003-,22991922]"; structure "0,1^2-"; splice_chain ",22991335^22991423-"; sources "Undefined,Undefined"; NMorMRNA "null"; degree "4"; dimension "2_2";
chr1	Undefined	as_event	23078348	23078873	.	+	.	transcript_id "Os01t0590700-01/Os01t0590700-02,MSTRG.3234.1"; gene_id "chr1:23072804-23080814W"; flanks "23078348-,23078873^"; structure "1^3-,2^4-"; splice_chain "23078464^23078590-,23078466^23078592-"; sources "Undefined,Undefined"; NMorMRNA "null"; degree "4"; dimension "2_2";
chr1	Undefined	as_event	23091864	23092360	.	+	.	transcript_id "MSTRG.3237.3,MSTRG.3237.6/Os01t0590900-01"; gene_id "chr1:23090754-23095283W"; flanks "23091864-,23092360^"; structure "0,1^2-"; splice_chain ",23091912^23092246-"; sources "Undefined,Undefined"; NMorMRNA "null"; degree "4"; dimension "2_2";
chr1	Undefined	as_event	23091912	23092481	.	+	.	transcript_id "MSTRG.3237.2,MSTRG.3237.6/Os01t0590900-01"; gene_id "chr1:23090754-23095283W"; flanks "23091912^,23092481-"; structure "0,1-2^"; splice_chain ",23092246-23092360^"; sources "Undefined,Undefined"; NMorMRNA "null"; degree "4"; dimension "2_2";
chr1	Undefined	as_event	23091864	23092481	.	+	.	transcript_id "MSTRG.3237.2,MSTRG.3237.6/Os01t0590900-01,MSTRG.3237.3"; gene_id "chr1:23090754-23095283W"; flanks "23091864-,23092481-"; structure "1^,1^2-3^,3^"; splice_chain "23091912^,23091912^23092246-23092360^,23092360^"; sources "Undefined,Undefined,Undefined"; NMorMRNA "null"; degree "9"; dimension "3_3";
chr1	Undefined	as_event	23092246	23092572	.	+	.	transcript_id "MSTRG.3237.7,MSTRG.3237.6/Os01t0590900-01"; gene_id "chr1:23090754-23095283W"; flanks "23092246-,23092572^"; structure "0,1^2-"; splice_chain ",23092360^23092481-"; sources "Undefined,Undefined"; NMorMRNA "null"; degree "4"; dimension "2_2";
chr1	Undefined	as_event	23091912	23092572	.	+	.	transcript_id "MSTRG.3237.7,MSTRG.3237.6/Os01t0590900-01,MSTRG.3237.2"; gene_id "chr1:23090754-23095283W"; flanks "23091912^,23092572^"; structure "1-,1-2^3-,3-"; splice_chain "23092246-,23092246-23092360^23092481-,23092481-"; sources "Undefined,Undefined,Undefined"; NMorMRNA "null"; degree "9"; dimension "3_3";
chr1	Undefined	as_event	23091864	23092572	.	+	.	transcript_id "MSTRG.3237.7,MSTRG.3237.6/Os01t0590900-01,MSTRG.3237.2,MSTRG.3237.3"; gene_id "chr1:23090754-23095283W"; flanks "23091864-,23092572^"; structure "1^2-,1^2-3^4-,1^4-,3^4-"; splice_chain "23091912^23092246-,23091912^23092246-23092360^23092481-,23091912^23092481-,23092360^23092481-"; sources "Undefined,Undefined,Undefined,Undefined"; NMorMRNA "null"; degree "16"; dimension "4_4";
chr1	Undefined	as_event	23092572	23092815	.	+	.	transcript_id "MSTRG.3237.2/MSTRG.3237.3/MSTRG.3237.7/Os01t0590900-01,MSTRG.3237.6"; gene_id "chr1:23090754-23095283W"; flanks "23092572^,23092815^"; structure "1-,2-"; splice_chain "23092668-,23092671-"; sources "Undefined,Undefined"; NMorMRNA "null"; degree "4"; dimension "2_2";
chr1	Undefined	as_event	23092246	23092815	.	+	.	transcript_id "MSTRG.3237.4,Os01t0590900-01,MSTRG.3237.6,MSTRG.3237.7"; gene_id "chr1:23090754-23095283W"; flanks "23092246-,23092815^"; structure "0,1^2-3^4-,1^2-3^5-,3^4-"; splice_chain ",23092360^23092481-23092572^23092668-,23092360^23092481-23092572^23092671-,23092572^23092668-"; sources "Undefined,Undefined,Undefined,Undefined"; NMorMRNA "null"; degree "16"; dimension "4_4";
chr1	Undefined	as_event	23091912	23092815	.	+	.	transcript_id "MSTRG.3237.4,Os01t0590900-01,MSTRG.3237.6,MSTRG.3237.7,MSTRG.3237.2"; gene_id "chr1:23090754-23095283W"; flanks "23091912^,23092815^"; structure "1-,1-2^3-4^5-,1-2^3-4^6-,1-4^5-,3-4^5-"; splice_chain "23092246-,23092246-23092360^23092481-23092572^23092668-,23092246-23092360^23092481-23092572^23092671-,23092246-23092572^23092668-,23092481-23092572^23092668-"; sources "Undefined,Unde…
chr1	Undefined	as_event	23091864	23092815	.	+	.	transcript_id "MSTRG.3237.4,Os01t0590900-01,MSTRG.3237.6,MSTRG.3237.7,MSTRG.3237.2,MSTRG.3237.3"; gene_id "chr1:23090754-23095283W"; flanks "23091864-,23092815^"; structure "1^2-,1^2-3^4-5^6-,1^2-3^4-5^7-,1^2-5^6-,1^4-5^6-,3^4-5^6-"; splice_chain "23091912^23092246-,23091912^23092246-23092360^23092481-23092572^23092668-,23091912^23092246-23092360^23092481-23092572^23092671-,23091912^23092246-2309…
chr1	Undefined	as_event	23092246	23093309	.	+	.	transcript_id "MSTRG.3237.5,Os01t0590900-01"; gene_id "chr1:23090754-23095283W"; flanks "23092246-,23093309^"; structure "0,1^2-3^4-5^6-"; splice_chain ",23092360^23092481-23092572^23092668-23092815^23093245-"; sources "Undefined,Undefined"; NMorMRNA "null"; degree "4"; dimension "2_2";
chr1	Undefined	as_event	23093245	23093481	.	+	.	transcript_id "MSTRG.3237.2/MSTRG.3237.3/MSTRG.3237.4/MSTRG.3237.6/MSTRG.3237.7,Os01t0590900-01"; gene_id "chr1:23090754-23095283W"; flanks "23093245-,23093481^"; structure "0,1^2-"; splice_chain ",23093309^23093384-"; sources "Undefined,Undefined"; NMorMRNA "null"; degree "4"; dimension "2_2";
chr1	Undefined	as_event	23092246	23093481	.	+	.	transcript_id "Os01t0590900-01,MSTRG.3237.6,MSTRG.3237.7,MSTRG.3237.4,MSTRG.3237.5"; gene_id "chr1:23090754-23095283W"; flanks "23092246-,23093481^"; structure "1^2-3^4-6^7-8^9-,1^2-3^5-6^7-,3^4-6^7-,6^7-,8^9-"; splice_chain "23092360^23092481-23092572^23092668-23092815^23093245-23093309^23093384-,23092360^23092481-23092572^23092671-23092815^23093245-,23092572^23092668-23092815^23093245-,23092815…
chr1	Undefined	as_event	23091912	23093481	.	+	.	transcript_id "Os01t0590900-01,MSTRG.3237.6,MSTRG.3237.7,MSTRG.3237.4,MSTRG.3237.5,MSTRG.3237.2"; gene_id "chr1:23090754-23095283W"; flanks "23091912^,23093481^"; structure "1-2^3-4^5-7^8-9^10-,1-2^3-4^6-7^8-,1-4^5-7^8-,1-7^8-,1-9^10-,3-4^5-7^8-"; splice_chain "23092246-23092360^23092481-23092572^23092668-23092815^23093245-23093309^23093384-,23092246-23092360^23092481-23092572^23092671-23092815^2…
chr1	Undefined	as_event	23091864	23093481	.	+	.	transcript_id "Os01t0590900-01,MSTRG.3237.6,MSTRG.3237.7,MSTRG.3237.4,MSTRG.3237.5,MSTRG.3237.2,MSTRG.3237.3"; gene_id "chr1:23090754-23095283W"; flanks "23091864-,23093481^"; structure "1^2-3^4-5^6-8^9-10^11-,1^2-3^4-5^7-8^9-,1^2-5^6-8^9-,1^2-8^9-,1^2-10^11-,1^4-5^6-8^9-,3^4-5^6-8^9-"; splice_chain "23091912^23092246-23092360^23092481-23092572^23092668-23092815^23093245-23093309^23093384-,230919…
chr1	Undefined	as_event	23105378	23105701	.	+	.	transcript_id "Os01t0591000-01/Os01t0591000-02,MSTRG.3238.1"; gene_id "chr1:23097259-23106301W"; flanks "23105378-,23105701^"; structure "1^3-,2^4-"; splice_chain "23105513^23105638-,23105515^23105640-"; sources "Undefined,Undefined"; NMorMRNA "null"; degree "4"; dimension "2_2";
chr1	Undefined	as_event	23117252	23117898	.	+	.	transcript_id "MSTRG.3241.1/MSTRG.3241.2,MSTRG.3241.3/Os01t0591300-01"; gene_id "chr1:23113647-23120516W"; flanks "23117252-,23117898^"; structure "0,1^2-"; splice_chain ",23117394^23117515-"; sources "Undefined,Undefined"; NMorMRNA "null"; degree "4"; dimension "2_2";
chr1	Undefined	as_event	23117515	23118108	.	+	.	transcript_id "MSTRG.3241.5,MSTRG.3241.6/Os01t0591300-01"; gene_id "chr1:23113647-23120516W"; flanks "23117515-,23118108^"; structure "0,1^2-"; splice_chain ",23117898^23118019-"; sources "Undefined,Undefined"; NMorMRNA "null"; degree "4"; dimension "2_2";
chr1	Undefined	as_event	23117252	23118108	.	+	.	transcript_id "MSTRG.3241.5,Os01t0591300-01,MSTRG.3241.1/MSTRG.3241.2"; gene_id "chr1:23113647-23120516W"; flanks "23117252-,23118108^"; structure "1^2-,1^2-3^4-,3^4-"; splice_chain "23117394^23117515-,23117394^23117515-23117898^23118019-,23117898^23118019-"; sources "Undefined,Undefined,Undefined"; NMorMRNA "null"; degree "9"; dimension "3_3";
chr1	Undefined	as_event	23118019	23118372	.	+	.	transcript_id "MSTRG.3241.3,MSTRG.3241.1/MSTRG.3241.2/MSTRG.3241.6/Os01t0591300-01"; gene_id "chr1:23113647-23120516W"; flanks "23118019-,23118372^"; structure "0,1^2-"; splice_chain ",23118108^23118199-"; sources "Undefined,Undefined"; NMorMRNA "null"; degree "4"; dimension "2_2";
chr1	Undefined	as_event	23117515	23118372	.	+	.	transcript_id "MSTRG.3241.3,MSTRG.3241.6/Os01t0591300-01,MSTRG.3241.5"; gene_id "chr1:23113647-23120516W"; flanks "23117515-,23118372^"; structure "1^2-,1^2-3^4-,3^4-"; splice_chain "23117898^23118019-,23117898^23118019-23118108^23118199-,23118108^23118199-"; sources "Undefined,Undefined,Undefined"; NMorMRNA "null"; degree "9"; dimension "3_3";
chr1	Undefined	as_event	23117252	23118372	.	+	.	transcript_id "MSTRG.3241.3,Os01t0591300-01,MSTRG.3241.5,MSTRG.3241.1/MSTRG.3241.2"; gene_id "chr1:23113647-23120516W"; flanks "23117252-,23118372^"; structure "1^2-3^4-,1^2-3^4-5^6-,1^2-5^6-,3^4-5^6-"; splice_chain "23117394^23117515-23117898^23118019-,23117394^23117515-23117898^23118019-23118108^23118199-,23117394^23117515-23118108^23118199-,23117898^23118019-23118108^23118199-"; sources "Undef…
chr1	Undefined	as_event	23118773	23119704	.	+	.	transcript_id "MSTRG.3241.3/MSTRG.3241.6,MSTRG.3241.2/Os01t0591300-01"; gene_id "chr1:23113647-23120516W"; flanks "23118773-,23119704]"; structure "0,1^2-3^4-"; splice_chain ",23118910^23118983-23119044^23119157-"; sources "Undefined,Undefined"; NMorMRNA "null"; degree "4"; dimension "2_2";
chr1	Undefined	as_event	23118497	23119704	.	+	.	transcript_id "MSTRG.3241.5,MSTRG.3241.3/MSTRG.3241.6,MSTRG.3241.2/Os01t0591300-01"; gene_id "chr1:23113647-23120516W"; flanks "23118497-,23119704]"; structure "0,1^2-,1^2-3^4-5^6-"; splice_chain ",23118634^23118773-,23118634^23118773-23118910^23118983-23119044^23119157-"; sources "Undefined,Undefined,Undefined"; NMorMRNA "null"; degree "9"; dimension "3_3";
chr1	Undefined	as_event	23192633	23192934	.	+	.	transcript_id "MSTRG.3246.1,MSTRG.3246.2"; gene_id "chr1:23189824-23214435W"; flanks "23192633^,23192934^"; structure "1-,2-"; splice_chain "23192840-,23192862-"; sources "Undefined,Undefined"; NMorMRNA "null"; degree "4"; dimension "2_2";
chr1	Undefined	as_event	23192840	23193433	.	+	.	transcript_id "MSTRG.3246.1,MSTRG.3246.3"; gene_id "chr1:23189824-23214435W"; flanks "23192840-,23193433-"; structure "1^,2^"; splice_chain "23192934^,23192950^"; sources "Undefined,Undefined"; NMorMRNA "null"; degree "4"; dimension "2_2";
chr1	Undefined	as_event	23192633	23193433	.	+	.	transcript_id "MSTRG.3246.1,MSTRG.3246.3,MSTRG.3246.2"; gene_id "chr1:23189824-23214435W"; flanks "23192633^,23193433-"; structure "1-3^,1-4^,2-3^"; splice_chain "23192840-23192934^,23192840-23192950^,23192862-23192934^"; sources "Undefined,Undefined,Undefined"; NMorMRNA "null"; degree "9"; dimension "3_3";
chr1	Undefined	as_event	23207802	23208336	.	+	.	transcript_id "MSTRG.3246.4,MSTRG.3246.1/MSTRG.3246.2/MSTRG.3246.3/MSTRG.3246.5"; gene_id "chr1:23189824-23214435W"; flanks "23207802-,23208336^"; structure "1^4-,2^3-"; splice_chain "23208067^23208245-,23208146^23208235-"; sources "Undefined,Undefined"; NMorMRNA "null"; degree "4"; dimension "2_2";
chr1	Undefined	as_event	23224373	23224822	.	+	.	transcript_id "MSTRG.3250.6/MSTRG.3250.7,Os01t0593200-01"; gene_id "chr1:23223487-23226605W"; flanks "23224373[,23224822^"; structure "0,1^2-"; splice_chain ",23224406^23224766-"; sources "Undefined,Undefined"; NMorMRNA "null"; degree "4"; dimension "2_2";
chr1	Undefined	as_event	23224766	23225906	.	+	.	transcript_id "MSTRG.3250.4,MSTRG.3250.5/Os01t0593200-01"; gene_id "chr1:23223487-23226605W"; flanks "23224766-,23225906^"; structure "0,1^2-"; splice_chain ",23224822^23225238-"; sources "Undefined,Undefined"; NMorMRNA "null"; degree "4"; dimension "2_2";
chr1	Undefined	as_event	23223487	23225906	.	+	.	transcript_id "MSTRG.3250.1/MSTRG.3250.2,MSTRG.3250.3"; gene_id "chr1:23223487-23226605W"; flanks "23223487[,23225906^"; structure "0,1^2-"; splice_chain ",23224822^23225238-"; sources "Undefined,Undefined"; NMorMRNA "null"; degree "4"; dimension "2_2";
chr1	Undefined	as_event	23224822	23226047	.	+	.	transcript_id "MSTRG.3250.7,MSTRG.3250.3/Os01t0593200-01"; gene_id "chr1:23223487-23226605W"; flanks "23224822^,23226047-"; structure "0,1-2^"; splice_chain ",23225238-23225906^"; sources "Undefined,Undefined"; NMorMRNA "null"; degree "4"; dimension "2_2";
chr1	Undefined	as_event	23224822	23226068	.	+	.	transcript_id "MSTRG.3250.6,MSTRG.3250.5"; gene_id "chr1:23223487-23226605W"; flanks "23224822^,23226068-"; structure "0,1-2^"; splice_chain ",23225238-23225906^"; sources "Undefined,Undefined"; NMorMRNA "null"; degree "4"; dimension "2_2";
chr1	Undefined	as_event	23225906	23226605	.	+	.	transcript_id "MSTRG.3250.1/MSTRG.3250.3/MSTRG.3250.4/Os01t0593200-01,MSTRG.3250.2/MSTRG.3250.5"; gene_id "chr1:23223487-23226605W"; flanks "23225906^,23226605]"; structure "1-,2-"; splice_chain "23226047-,23226068-"; sources "Undefined,Undefined"; NMorMRNA "null"; degree "4"; dimension "2_2";
chr1	Undefined	as_event	23224822	23226605	.	+	.	transcript_id "MSTRG.3250.3/Os01t0593200-01,MSTRG.3250.5,MSTRG.3250.7,MSTRG.3250.6"; gene_id "chr1:23223487-23226605W"; flanks "23224822^,23226605]"; structure "1-2^3-,1-2^4-,3-,4-"; splice_chain "23225238-23225906^23226047-,23225238-23225906^23226068-,23226047-,23226068-"; sources "Undefined,Undefined,Undefined,Undefined"; NMorMRNA "null"; degree "16"; dimension "4_4";
chr1	Undefined	as_event	23316876	23318640	.	+	.	transcript_id "MSTRG.3267.3,MSTRG.3267.1/MSTRG.3267.2/Os01t0595100-01"; gene_id "chr1:23315752-23323888W"; flanks "23316876^,23318640^"; structure "1-,2-"; splice_chain "23318538-,23318541-"; sources "Undefined,Undefined"; NMorMRNA "null"; degree "4"; dimension "2_2";
chr1	Undefined	as_event	23321435	23321642	.	+	.	transcript_id "Os01t0595100-01,MSTRG.3267.1"; gene_id "chr1:23315752-23323888W"; flanks "23321435-,23321642^"; structure "1^3-,2^4-"; splice_chain "23321478^23321571-,23321480^23321573-"; sources "Undefined,Undefined"; NMorMRNA "null"; degree "4"; dimension "2_2";
chr1	Undefined	as_event	23321573	23321725	.	+	.	transcript_id "MSTRG.3267.2/MSTRG.3267.3,MSTRG.3267.1"; gene_id "chr1:23315752-23323888W"; flanks "23321573-,23321725-"; structure "1^,2^"; splice_chain "23321613^,23321642^"; sources "Undefined,Undefined"; NMorMRNA "null"; degree "4"; dimension "2_2";
chr1	Undefined	as_event	23321435	23321725	.	+	.	transcript_id "Os01t0595100-01,MSTRG.3267.2/MSTRG.3267.3,MSTRG.3267.1"; gene_id "chr1:23315752-23323888W"; flanks "23321435-,23321725-"; structure "1^3-6^,2^4-5^,2^4-6^"; splice_chain "23321478^23321571-23321642^,23321480^23321573-23321613^,23321480^23321573-23321642^"; sources "Undefined,Undefined,Undefined"; NMorMRNA "null"; degree "9"; dimension "3_3";
chr1	Undefined	as_event	23333024	23336896	.	+	.	transcript_id "Os01t0595400-01,MSTRG.3270.1"; gene_id "chr1:23333024-23337221W"; flanks "23333024[,23336896-"; structure "1^,2^"; splice_chain "23333583^,23333589^"; sources "Undefined,Undefined"; NMorMRNA "null"; degree "4"; dimension "2_2";
chr1	Undefined	as_event	23440297	23441397	.	+	.	transcript_id "Os01t0597400-00,MSTRG.3282.1"; gene_id "chr1:23438619-23441397W"; flanks "23440297^,23441397]"; structure "1-,2-"; splice_chain "23440855-,23440884-"; sources "Undefined,Undefined"; NMorMRNA "null"; degree "4"; dimension "2_2";
chr1	Undefined	as_event	23577237	23578139	.	+	.	transcript_id "MSTRG.3295.1/MSTRG.3295.2/MSTRG.3295.3/Os01t0600300-02,Os01t0600300-01"; gene_id "chr1:23577237-23580592W"; flanks "23577237[,23578139^"; structure "0,1^2-"; splice_chain ",23577484^23578056-"; sources "Undefined,Undefined"; NMorMRNA "null"; degree "4"; dimension "2_2";
chr1	Undefined	as_event	23578243	23578777	.	+	.	transcript_id "MSTRG.3295.2,MSTRG.3295.3"; gene_id "chr1:23577237-23580592W"; flanks "23578243-,23578777^"; structure "0,1^2-"; splice_chain ",23578295^23578621-"; sources "Undefined,Undefined"; NMorMRNA "null"; degree "4"; dimension "2_2";
chr1	Undefined	as_event	23578295	23579214	.	+	.	transcript_id "Os01t0600300-01/Os01t0600300-02,MSTRG.3295.3"; gene_id "chr1:23577237-23580592W"; flanks "23578295^,23579214-"; structure "0,1-2^"; splice_chain ",23578621-23578777^"; sources "Undefined,Undefined"; NMorMRNA "null"; degree "4"; dimension "2_2";
chr1	Undefined	as_event	23578243	23579214	.	+	.	transcript_id "Os01t0600300-01/Os01t0600300-02,MSTRG.3295.3,MSTRG.3295.2"; gene_id "chr1:23577237-23580592W"; flanks "23578243-,23579214-"; structure "1^,1^2-3^,3^"; splice_chain "23578295^,23578295^23578621-23578777^,23578777^"; sources "Undefined,Undefined,Undefined"; NMorMRNA "null"; degree "9"; dimension "3_3";
chr1	Undefined	as_event	23578243	23579380	.	+	.	transcript_id "MSTRG.3295.1/MSTRG.3295.6,MSTRG.3295.3,Os01t0600300-01/Os01t0600300-02,MSTRG.3295.2"; gene_id "chr1:23577237-23580592W"; flanks "23578243-,23579380^"; structure "0,1^2-3^4-,1^4-,3^4-"; splice_chain ",23578295^23578621-23578777^23579214-,23578295^23579214-,23578777^23579214-"; sources "Undefined,Undefined,Undefined,Undefined"; NMorMRNA "null"; degree "16"; dimension "4_4";
chr1	Undefined	as_event	23579380	23579602	.	+	.	transcript_id "MSTRG.3295.1/MSTRG.3295.2/MSTRG.3295.3/Os01t0600300-01/Os01t0600300-02,MSTRG.3295.6"; gene_id "chr1:23577237-23580592W"; flanks "23579380^,23579602^"; structure "1-,2-"; splice_chain "23579454-,23579462-"; sources "Undefined,Undefined"; NMorMRNA "null"; degree "4"; dimension "2_2";
chr1	Undefined	as_event	23584068	23584745	.	+	.	transcript_id "MSTRG.3296.1,MSTRG.3296.2"; gene_id "chr1:23581501-23585981W"; flanks "23584068-,23584745-"; structure "1^,2^"; splice_chain "23584295^,23584381^"; sources "Undefined,Undefined"; NMorMRNA "null"; degree "4"; dimension "2_2";
chr1	Undefined	as_event	23760580	23761615	.	+	.	transcript_id "MSTRG.3320.2,Os01t0603300-02"; gene_id "chr1:23760347-23762387W"; flanks "23760580[,23761615^"; structure "0,1^2-"; splice_chain ",23760964^23761419-"; sources "Undefined,Undefined"; NMorMRNA "null"; degree "4"; dimension "2_2";
chr1	Undefined	as_event	23882077	23883388	.	+	.	transcript_id "MSTRG.3341.1,MSTRG.3341.2"; gene_id "chr1:23881813-23884741W"; flanks "23882077^,23883388^"; structure "1-,2-"; splice_chain "23883253-,23883263-"; sources "Undefined,Undefined"; NMorMRNA "null"; degree "4"; dimension "2_2";
chr1	Undefined	as_event	23911517	23912053	.	+	.	transcript_id "MSTRG.3350.1,MSTRG.3350.2/Os01t0606900-01"; gene_id "chr1:23911517-23913239W"; flanks "23911517[,23912053^"; structure "0,1^2-"; splice_chain ",23911845^23911966-"; sources "Undefined,Undefined"; NMorMRNA "null"; degree "4"; dimension "2_2";
chr1	Undefined	as_event	23912171	23912432	.	+	.	transcript_id "MSTRG.3350.2,Os01t0606900-01"; gene_id "chr1:23911517-23913239W"; flanks "23912171-,23912432^"; structure "0,1^2-"; splice_chain ",23912253^23912376-"; sources "Undefined,Undefined"; NMorMRNA "null"; degree "4"; dimension "2_2";
chr1	Undefined	as_event	23912376	23913239	.	+	.	transcript_id "MSTRG.3350.1,Os01t0606900-01"; gene_id "chr1:23911517-23913239W"; flanks "23912376-,23913239]"; structure "0,1^2-"; splice_chain ",23912432^23912583-"; sources "Undefined,Undefined"; NMorMRNA "null"; degree "4"; dimension "2_2";
chr1	Undefined	as_event	23912171	23913239	.	+	.	transcript_id "MSTRG.3350.1,Os01t0606900-01,MSTRG.3350.2"; gene_id "chr1:23911517-23913239W"; flanks "23912171-,23913239]"; structure "1^2-,1^2-3^4-,3^4-"; splice_chain "23912253^23912376-,23912253^23912376-23912432^23912583-,23912432^23912583-"; sources "Undefined,Undefined,Undefined"; NMorMRNA "null"; degree "9"; dimension "3_3";
chr1	Undefined	as_event	23930017	23931338	.	+	.	transcript_id "MSTRG.3354.2,Os01t0607200-02"; gene_id "chr1:23923718-23933449W"; flanks "23930017-,23931338^"; structure "0,1^2-"; splice_chain ",23930277^23931320-"; sources "Undefined,Undefined"; NMorMRNA "null"; degree "4"; dimension "2_2";
chr1	Undefined	as_event	24140188	24141452	.	+	.	transcript_id "MSTRG.3382.4,Os01t0610300-01"; gene_id "chr1:24136871-24144292W"; flanks "24140188-,24141452^"; structure "0,1^2-"; splice_chain ",24140633^24141429-"; sources "Undefined,Undefined"; NMorMRNA "null"; degree "4"; dimension "2_2";
chr1	Undefined	as_event	24141429	24141717	.	+	.	transcript_id "MSTRG.3382.5,Os01t0610300-01"; gene_id "chr1:24136871-24144292W"; flanks "24141429-,24141717^"; structure "0,1^2-"; splice_chain ",24141452^24141625-"; sources "Undefined,Undefined"; NMorMRNA "null"; degree "4"; dimension "2_2";
chr1	Undefined	as_event	24140188	24141717	.	+	.	transcript_id "MSTRG.3382.3,MSTRG.3382.5,Os01t0610300-01,MSTRG.3382.4"; gene_id "chr1:24136871-24144292W"; flanks "24140188-,24141717^"; structure "0,1^2-,1^2-3^4-,3^4-"; splice_chain ",24140633^24141429-,24140633^24141429-24141452^24141625-,24141452^24141625-"; sources "Undefined,Undefined,Undefined,Undefined"; NMorMRNA "null"; degree "16"; dimension "4_4";
chr1	Undefined	as_event	24140074	24141717	.	+	.	transcript_id "MSTRG.3382.3,MSTRG.3382.5,Os01t0610300-01,MSTRG.3382.4,MSTRG.3382.1"; gene_id "chr1:24136871-24144292W"; flanks "24140074^,24141717^"; structure "1-,1-3^4-,1-3^4-5^6-,1-5^6-,2-"; splice_chain "24140188-,24140188-24140633^24141429-,24140188-24140633^24141429-24141452^24141625-,24140188-24141452^24141625-,24140212-"; sources "Undefined,Undefined,Undefined,Undefined,Undefined"; NMorMR…
chr1	Undefined	as_event	24143368	24143677	.	+	.	transcript_id "MSTRG.3382.1,MSTRG.3382.3/MSTRG.3382.4/MSTRG.3382.5/Os01t0610300-01"; gene_id "chr1:24136871-24144292W"; flanks "24143368-,24143677^"; structure "0,1^2-"; splice_chain ",24143479^24143561-"; sources "Undefined,Undefined"; NMorMRNA "null"; degree "4"; dimension "2_2";
chr1	Undefined	as_event	24195958	24196166	.	+	.	transcript_id "MSTRG.3395.3,MSTRG.3395.4"; gene_id "chr1:24195503-24196626W"; flanks "24195958-,24196166-"; structure "1^,2^"; splice_chain "24196057^,24196069^"; sources "Undefined,Undefined"; NMorMRNA "null"; degree "4"; dimension "2_2";
chr1	Undefined	as_event	24195872	24196166	.	+	.	transcript_id "MSTRG.3395.1,MSTRG.3395.3,MSTRG.3395.4"; gene_id "chr1:24195503-24196626W"; flanks "24195872^,24196166-"; structure "0,1-2^,1-3^"; splice_chain ",24195958-24196057^,24195958-24196069^"; sources "Undefined,Undefined,Undefined"; NMorMRNA "null"; degree "9"; dimension "3_3";
chr1	Undefined	as_event	24255721	24255975	.	+	.	transcript_id "MSTRG.3403.1,Os01t0612200-01"; gene_id "chr1:24255379-24259940W"; flanks "24255721-,24255975^"; structure "0,1^2-"; splice_chain ",24255800^24255925-"; sources "Undefined,Undefined"; NMorMRNA "null"; degree "4"; dimension "2_2";
chr1	Undefined	as_event	24300355	24300729	.	+	.	transcript_id "MSTRG.3412.3,MSTRG.3412.2/Os01t0612800-01"; gene_id "chr1:24300144-24301310W"; flanks "24300355^,24300729-"; structure "0,1-2^"; splice_chain ",24300463-24300611^"; sources "Undefined,Undefined"; NMorMRNA "null"; degree "4"; dimension "2_2";
chr1	Undefined	as_event	24300729	24301062	.	+	.	transcript_id "MSTRG.3412.2,Os01t0612800-01"; gene_id "chr1:24300144-24301310W"; flanks "24300729-,24301062]"; structure "0,1^2-"; splice_chain ",24300826^24300918-"; sources "Undefined,Undefined"; NMorMRNA "null"; degree "4"; dimension "2_2";
chr1	Undefined	as_event	24312652	24313953	.	+	.	transcript_id "Os01t0612900-01,MSTRG.3413.2"; gene_id "chr1:24311944-24317311W"; flanks "24312652[,24313953-"; structure "1^,2^"; splice_chain "24313106^,24313322^"; sources "Undefined,Undefined"; NMorMRNA "null"; degree "4"; dimension "2_2";
chr1	Undefined	as_event	24315159	24315516	.	+	.	transcript_id "MSTRG.3413.4,MSTRG.3413.1/MSTRG.3413.2/Os01t0612900-01"; gene_id "chr1:24311944-24317311W"; flanks "24315159^,24315516^"; structure "1-,2-"; splice_chain "24315232-,24315240-"; sources "Undefined,Undefined"; NMorMRNA "null"; degree "4"; dimension "2_2";
chr1	Undefined	as_event	24376939	24377187	.	+	.	transcript_id "MSTRG.3425.4,Os01t0614700-01/Os01t0614700-02"; gene_id "chr1:24375877-24379899W"; flanks "24376939-,24377187^"; structure "0,1^2-"; splice_chain ",24377011^24377156-"; sources "Undefined,Undefined"; NMorMRNA "null"; degree "4"; dimension "2_2";
chr1	Undefined	as_event	24377011	24377371	.	+	.	transcript_id "MSTRG.3425.2,MSTRG.3425.5/Os01t0614700-01/Os01t0614700-02"; gene_id "chr1:24375877-24379899W"; flanks "24377011^,24377371-"; structure "0,1-2^"; splice_chain ",24377156-24377187^"; sources "Undefined,Undefined"; NMorMRNA "null"; degree "4"; dimension "2_2";
chr1	Undefined	as_event	24376939	24377371	.	+	.	transcript_id "MSTRG.3425.2,Os01t0614700-01/Os01t0614700-02,MSTRG.3425.4"; gene_id "chr1:24375877-24379899W"; flanks "24376939-,24377371-"; structure "1^,1^2-3^,3^"; splice_chain "24377011^,24377011^24377156-24377187^,24377187^"; sources "Undefined,Undefined,Undefined"; NMorMRNA "null"; degree "9"; dimension "3_3";
chr1	Undefined	as_event	24378016	24379349	.	+	.	transcript_id "MSTRG.3425.2/Os01t0614700-01,Os01t0614700-02"; gene_id "chr1:24375877-24379899W"; flanks "24378016^,24379349-"; structure "0,1-2^"; splice_chain ",24378452-24378614^"; sources "Undefined,Undefined"; NMorMRNA "null"; degree "4"; dimension "2_2";
chr1	Undefined	as_event	24377905	24379897	.	+	.	transcript_id "MSTRG.3425.4,Os01t0614700-02"; gene_id "chr1:24375877-24379899W"; flanks "24377905-,24379897]"; structure "0,1^2-3^4-"; splice_chain ",24378016^24378452-24378614^24379349-"; sources "Undefined,Undefined"; NMorMRNA "null"; degree "4"; dimension "2_2";
chr1	Undefined	as_event	24377905	24379899	.	+	.	transcript_id "MSTRG.3425.5,MSTRG.3425.2/Os01t0614700-01"; gene_id "chr1:24375877-24379899W"; flanks "24377905-,24379899]"; structure "0,1^2-"; splice_chain ",24378016^24379349-"; sources "Undefined,Undefined"; NMorMRNA "null"; degree "4"; dimension "2_2";
chr1	Undefined	as_event	24559329	24559960	.	+	.	transcript_id "MSTRG.3457.1,Os01t0617700-01"; gene_id "chr1:24559329-24568756W"; flanks "24559329[,24559960^"; structure "0,1^2-"; splice_chain ",24559526^24559773-"; sources "Undefined,Undefined"; NMorMRNA "null"; degree "4"; dimension "2_2";
chr1	Undefined	as_event	24574486	24574636	.	+	.	transcript_id "Os01t0617900-01/Os01t0617900-03,Os01t0617900-02"; gene_id "chr1:24572983-24575556W"; flanks "24574486^,24574636^"; structure "1-,2-"; splice_chain "24574577-,24574580-"; sources "Undefined,Undefined"; NMorMRNA "null"; degree "4"; dimension "2_2";
chr1	Undefined	as_event	24586827	24587015	.	+	.	transcript_id "MSTRG.3464.1,MSTRG.3464.3/Os01t0618200-01"; gene_id "chr1:24584355-24589431W"; flanks "24586827-,24587015-"; structure "1^,2^"; splice_chain "24586925^,24586932^"; sources "Undefined,Undefined"; NMorMRNA "null"; degree "4"; dimension "2_2";
chr1	Undefined	as_event	24603208	24603564	.	+	.	transcript_id "MSTRG.3467.2,MSTRG.3467.3/Os01t0618500-01"; gene_id "chr1:24602227-24605484W"; flanks "24603208-,24603564^"; structure "0,1^2-"; splice_chain ",24603263^24603358-"; sources "Undefined,Undefined"; NMorMRNA "null"; degree "4"; dimension "2_2";
chr1	Undefined	as_event	24603646	24604012	.	+	.	transcript_id "MSTRG.3467.2/MSTRG.3467.3,Os01t0618500-01"; gene_id "chr1:24602227-24605484W"; flanks "24603646-,24604012^"; structure "0,1^2-"; splice_chain ",24603852^24603926-"; sources "Undefined,Undefined"; NMorMRNA "null"; degree "4"; dimension "2_2";
chr1	Undefined	as_event	24693485	24693749	.	+	.	transcript_id "Os01t0619800-01,MSTRG.3481.1"; gene_id "chr1:24691392-24696535W"; flanks "24693485-,24693749^"; structure "0,1^2-"; splice_chain ",24693582^24693662-"; sources "Undefined,Undefined"; NMorMRNA "null"; degree "4"; dimension "2_2";
chr1	Undefined	as_event	24810016	24813386	.	+	.	transcript_id "MSTRG.3503.3,Os01t0621900-01"; gene_id "chr1:24808516-24813386W"; flanks "24810016^,24813386]"; structure "1-,2-"; splice_chain "24810795-,24810798-"; sources "Undefined,Undefined"; NMorMRNA "null"; degree "4"; dimension "2_2";
chr1	Undefined	as_event	24833476	24834277	.	+	.	transcript_id "MSTRG.3509.2,MSTRG.3509.3"; gene_id "chr1:24833455-24838546W"; flanks "24833476[,24834277^"; structure "0,1^2-"; splice_chain ",24833741^24833817-"; sources "Undefined,Undefined"; NMorMRNA "null"; degree "4"; dimension "2_2";
chr1	Undefined	as_event	24834543	24836916	.	+	.	transcript_id "MSTRG.3509.2/MSTRG.3509.4,MSTRG.3509.3"; gene_id "chr1:24833455-24838546W"; flanks "24834543-,24836916-"; structure "1^,2^"; splice_chain "24834593^,24834605^"; sources "Undefined,Undefined"; NMorMRNA "null"; degree "4"; dimension "2_2";
chr1	Undefined	as_event	24836916	24838546	.	+	.	transcript_id "MSTRG.3509.2/MSTRG.3509.3,MSTRG.3509.4"; gene_id "chr1:24833455-24838546W"; flanks "24836916-,24838546]"; structure "0,1^2-"; splice_chain ",24838111^24838253-"; sources "Undefined,Undefined"; NMorMRNA "null"; degree "4"; dimension "2_2";
chr1	Undefined	as_event	24834543	24838546	.	+	.	transcript_id "Os01t0622500-01,MSTRG.3509.2,MSTRG.3509.4,MSTRG.3509.3"; gene_id "chr1:24833455-24838546W"; flanks "24834543-,24838546]"; structure "0,1^3-,1^3-4^5-,2^3-"; splice_chain ",24834593^24836916-,24834593^24836916-24838111^24838253-,24834605^24836916-"; sources "Undefined,Undefined,Undefined,Undefined"; NMorMRNA "null"; degree "16"; dimension "4_4";
chr1	Undefined	as_event	24896628	24896925	.	+	.	transcript_id "MSTRG.3523.4,Os01t0623500-01"; gene_id "chr1:24894706-24899506W"; flanks "24896628^,24896925^"; structure "1-,2-"; splice_chain "24896835-,24896867-"; sources "Undefined,Undefined"; NMorMRNA "null"; degree "4"; dimension "2_2";
chr1	Undefined	as_event	24896534	24896925	.	+	.	transcript_id "MSTRG.3523.1,MSTRG.3523.4,Os01t0623500-01"; gene_id "chr1:24894706-24899506W"; flanks "24896534-,24896925^"; structure "0,1^2-,1^3-"; splice_chain ",24896628^24896835-,24896628^24896867-"; sources "Undefined,Undefined,Undefined"; NMorMRNA "null"; degree "9"; dimension "3_3";
chr1	Undefined	as_event	24896628	24897502	.	+	.	transcript_id "MSTRG.3523.4,Os01t0623500-01,MSTRG.3523.3"; gene_id "chr1:24894706-24899506W"; flanks "24896628^,24897502^"; structure "1-3^4-,2-3^4-,5-"; splice_chain "24896835-24896925^24897003-,24896867-24896925^24897003-,24897102-"; sources "Undefined,Undefined,Undefined"; NMorMRNA "null"; degree "9"; dimension "3_3";
chr1	Undefined	as_event	24896534	24897502	.	+	.	transcript_id "MSTRG.3523.4,Os01t0623500-01,MSTRG.3523.3,MSTRG.3523.1"; gene_id "chr1:24894706-24899506W"; flanks "24896534-,24897502^"; structure "1^2-4^5-,1^3-4^5-,1^6-,4^5-"; splice_chain "24896628^24896835-24896925^24897003-,24896628^24896867-24896925^24897003-,24896628^24897102-,24896925^24897003-"; sources "Undefined,Undefined,Undefined,Undefined"; NMorMRNA "null"; degree "16"; dimension "4…
chr1	Undefined	as_event	25070686	25071400	.	+	.	transcript_id "MSTRG.3552.7,MSTRG.3552.5"; gene_id "chr1:25070669-25072878W"; flanks "25070686[,25071400-"; structure "1^,2^"; splice_chain "25071266^,25071292^"; sources "Undefined,Undefined"; NMorMRNA "null"; degree "4"; dimension "2_2";
chr1	Undefined	as_event	25070669	25071400	.	+	.	transcript_id "MSTRG.3552.1,MSTRG.3552.2/MSTRG.3552.3"; gene_id "chr1:25070669-25072878W"; flanks "25070669[,25071400-"; structure "1^,2^"; splice_chain "25071246^,25071292^"; sources "Undefined,Undefined"; NMorMRNA "null"; degree "4"; dimension "2_2";
chr1	Undefined	as_event	25070704	25071644	.	+	.	transcript_id "MSTRG.3552.8,MSTRG.3552.9"; gene_id "chr1:25070669-25072878W"; flanks "25070704[,25071644^"; structure "0,1^2-"; splice_chain ",25071266^25071400-"; sources "Undefined,Undefined"; NMorMRNA "null"; degree "4"; dimension "2_2";
chr1	Undefined	as_event	25070686	25071644	.	+	.	transcript_id "MSTRG.3552.6,MSTRG.3552.7,MSTRG.3552.5"; gene_id "chr1:25070669-25072878W"; flanks "25070686[,25071644^"; structure "0,1^3-,2^3-"; splice_chain ",25071266^25071400-,25071292^25071400-"; sources "Undefined,Undefined,Undefined"; NMorMRNA "null"; degree "9"; dimension "3_3";
chr1	Undefined	as_event	25070669	25071644	.	+	.	transcript_id "MSTRG.3552.4,MSTRG.3552.1,MSTRG.3552.2/MSTRG.3552.3"; gene_id "chr1:25070669-25072878W"; flanks "25070669[,25071644^"; structure "0,1^3-,2^3-"; splice_chain ",25071246^25071400-,25071292^25071400-"; sources "Undefined,Undefined,Undefined"; NMorMRNA "null"; degree "9"; dimension "3_3";
chr1	Undefined	as_event	25071644	25072149	.	+	.	transcript_id "MSTRG.3552.4/MSTRG.3552.7,MSTRG.3552.1/MSTRG.3552.5"; gene_id "chr1:25070669-25072878W"; flanks "25071644^,25072149^"; structure "1-,2-"; splice_chain "25071747-,25071785-"; sources "Undefined,Undefined"; NMorMRNA "null"; degree "4"; dimension "2_2";
chr1	Undefined	as_event	25071785	25072280	.	+	.	transcript_id "MSTRG.3552.1/MSTRG.3552.5,Os01t0627933-00,MSTRG.3552.3/MSTRG.3552.6/MSTRG.3552.9"; gene_id "chr1:25070669-25072878W"; flanks "25071785-,25072280-"; structure "1^,2^,3^"; splice_chain "25072149^,25072173^,25072203^"; sources "Undefined,Undefined,Undefined"; NMorMRNA "null"; degree "9"; dimension "3_3";
chr1	Undefined	as_event	25071644	25072280	.	+	.	transcript_id "MSTRG.3552.4/MSTRG.3552.7,MSTRG.3552.1/MSTRG.3552.5,Os01t0627933-00,MSTRG.3552.3/MSTRG.3552.6/MSTRG.3552.9"; gene_id "chr1:25070669-25072878W"; flanks "25071644^,25072280-"; structure "1-3^,2-3^,2-4^,2-5^"; splice_chain "25071747-25072149^,25071785-25072149^,25071785-25072173^,25071785-25072203^"; sources "Undefined,Undefined,Undefined,Undefined"; NMorMRNA "null"; degree "16"; dime…
chr1	Undefined	as_event	25071644	25072851	.	+	.	transcript_id "MSTRG.3552.8,MSTRG.3552.10"; gene_id "chr1:25070669-25072878W"; flanks "25071644^,25072851]"; structure "1-,2-"; splice_chain "25071747-,25071785-"; sources "Undefined,Undefined"; NMorMRNA "null"; degree "4"; dimension "2_2";
chr1	Undefined	as_event	25071785	25072878	.	+	.	transcript_id "MSTRG.3552.2,MSTRG.3552.1,MSTRG.3552.3"; gene_id "chr1:25070669-25072878W"; flanks "25071785-,25072878]"; structure "0,1^3-,2^3-"; splice_chain ",25072149^25072280-,25072203^25072280-"; sources "Undefined,Undefined,Undefined"; NMorMRNA "null"; degree "9"; dimension "3_3";
chr1	Undefined	as_event	25071644	25072878	.	+	.	transcript_id "MSTRG.3552.4,MSTRG.3552.2,MSTRG.3552.1,MSTRG.3552.3"; gene_id "chr1:25070669-25072878W"; flanks "25071644^,25072878]"; structure "1-3^5-,2-,2-3^5-,2-4^5-"; splice_chain "25071747-25072149^25072280-,25071785-,25071785-25072149^25072280-,25071785-25072203^25072280-"; sources "Undefined,Undefined,Undefined,Undefined"; NMorMRNA "null"; degree "16"; dimension "4_4";
chr1	Undefined	as_event	25116769	25117553	.	+	.	transcript_id "MSTRG.3557.2,Os01t0628700-01"; gene_id "chr1:25114083-25118356W"; flanks "25116769-,25117553^"; structure "0,1^2-"; splice_chain ",25117016^25117163-"; sources "Undefined,Undefined"; NMorMRNA "null"; degree "4"; dimension "2_2";
chr1	Undefined	as_event	25120534	25120901	.	+	.	transcript_id "MSTRG.3558.3,MSTRG.3558.2"; gene_id "chr1:25119455-25121919W"; flanks "25120534-,25120901-"; structure "1^,2^"; splice_chain "25120778^,25120817^"; sources "Undefined,Undefined"; NMorMRNA "null"; degree "4"; dimension "2_2";
chr1	Undefined	as_event	25120887	25121919	.	+	.	transcript_id "MSTRG.3558.1,Os01t0628900-01"; gene_id "chr1:25119455-25121919W"; flanks "25120887-,25121919]"; structure "0,1^2-"; splice_chain ",25121271^25121348-"; sources "Undefined,Undefined"; NMorMRNA "null"; degree "4"; dimension "2_2";
chr1	Undefined	as_event	25120778	25121919	.	+	.	transcript_id "MSTRG.3558.1,Os01t0628900-01,MSTRG.3558.3"; gene_id "chr1:25119455-25121919W"; flanks "25120778^,25121919]"; structure "1-,1-3^4-,2-"; splice_chain "25120887-,25120887-25121271^25121348-,25120901-"; sources "Undefined,Undefined,Undefined"; NMorMRNA "null"; degree "9"; dimension "3_3";
chr1	Undefined	as_event	25120534	25121919	.	+	.	transcript_id "MSTRG.3558.1,Os01t0628900-01,MSTRG.3558.3,MSTRG.3558.2"; gene_id "chr1:25119455-25121919W"; flanks "25120534-,25121919]"; structure "1^3-,1^3-5^6-,1^4-,2^4-"; splice_chain "25120778^25120887-,25120778^25120887-25121271^25121348-,25120778^25120901-,25120817^25120901-"; sources "Undefined,Undefined,Undefined,Undefined"; NMorMRNA "null"; degree "16"; dimension "4_4";
chr1	Undefined	as_event	25133030	25133967	.	+	.	transcript_id "MSTRG.3562.2/Os01t0629400-01,MSTRG.3562.3,MSTRG.3562.4"; gene_id "chr1:25132887-25138118W"; flanks "25133030^,25133967^"; structure "1-,2-,3-"; splice_chain "25133756-,25133851-,25133859-"; sources "Undefined,Undefined,Undefined"; NMorMRNA "null"; degree "9"; dimension "3_3";
chr1	Undefined	as_event	25133967	25135930	.	+	.	transcript_id "MSTRG.3562.2/MSTRG.3562.3/MSTRG.3562.4/Os01t0629400-01,MSTRG.3562.5"; gene_id "chr1:25132887-25138118W"; flanks "25133967^,25135930^"; structure "1-3^4-,2-"; splice_chain "25134813-25134943^25135822-,25134875-"; sources "Undefined,Undefined"; NMorMRNA "null"; degree "4"; dimension "2_2";
chr1	Undefined	as_event	25134875	25136069	.	+	.	transcript_id "MSTRG.3562.6,MSTRG.3562.5"; gene_id "chr1:25132887-25138118W"; flanks "25134875-,25136069-"; structure "1^,2^"; splice_chain "25135902^,25135930^"; sources "Undefined,Undefined"; NMorMRNA "null"; degree "4"; dimension "2_2";
chr1	Undefined	as_event	25133967	25136069	.	+	.	transcript_id "MSTRG.3562.2/MSTRG.3562.3/MSTRG.3562.4/Os01t0629400-01,MSTRG.3562.6,MSTRG.3562.5"; gene_id "chr1:25132887-25138118W"; flanks "25133967^,25136069-"; structure "1-3^4-6^,2-5^,2-6^"; splice_chain "25134813-25134943^25135822-25135930^,25134875-25135902^,25134875-25135930^"; sources "Undefined,Undefined,Undefined"; NMorMRNA "null"; degree "9"; dimension "3_3";
chr1	Undefined	as_event	25136069	25137420	.	+	.	transcript_id "Os01t0629400-01,MSTRG.3562.2/MSTRG.3562.3/MSTRG.3562.4/MSTRG.3562.5"; gene_id "chr1:25132887-25138118W"; flanks "25136069-,25137420^"; structure "0,1^2-"; splice_chain ",25136548^25137083-"; sources "Undefined,Undefined"; NMorMRNA "null"; degree "4"; dimension "2_2";
chr1	Undefined	as_event	25137083	25138116	.	+	.	transcript_id "MSTRG.3562.6,MSTRG.3562.3/MSTRG.3562.4/MSTRG.3562.5"; gene_id "chr1:25132887-25138118W"; flanks "25137083-,25138116]"; structure "0,1^2-"; splice_chain ",25137420^25137699-"; sources "Undefined,Undefined"; NMorMRNA "null"; degree "4"; dimension "2_2";
chr1	Undefined	as_event	25136069	25138116	.	+	.	transcript_id "MSTRG.3562.6,MSTRG.3562.3/MSTRG.3562.4/MSTRG.3562.5,Os01t0629400-01"; gene_id "chr1:25132887-25138118W"; flanks "25136069-,25138116]"; structure "1^2-,1^2-3^4-,3^4-"; splice_chain "25136548^25137083-,25136548^25137083-25137420^25137699-,25137420^25137699-"; sources "Undefined,Undefined,Undefined"; NMorMRNA "null"; degree "9"; dimension "3_3";
chr1	Undefined	as_event	25211540	25212179	.	+	.	transcript_id "MSTRG.3574.2,MSTRG.3574.1"; gene_id "chr1:25203447-25212464W"; flanks "25211540^,25212179-"; structure "0,1-2^"; splice_chain ",25211655-25211751^"; sources "Undefined,Undefined"; NMorMRNA "null"; degree "4"; dimension "2_2";
chr1	Undefined	as_event	25228733	25230793	.	+	.	transcript_id "Os01t0631100-02,MSTRG.3575.1/Os01t0631100-01"; gene_id "chr1:25226524-25233773W"; flanks "25228733-,25230793^"; structure "0,1^2-3^4-"; splice_chain ",25228805^25229398-25229556^25230644-"; sources "Undefined,Undefined"; NMorMRNA "null"; degree "4"; dimension "2_2";
chr1	Undefined	as_event	25319870	25321039	.	+	.	transcript_id "MSTRG.3591.1,MSTRG.3591.2"; gene_id "chr1:25319755-25323545W"; flanks "25319870^,25321039-"; structure "0,1-2^"; splice_chain ",25320805-25320898^"; sources "Undefined,Undefined"; NMorMRNA "null"; degree "4"; dimension "2_2";
chr1	Undefined	as_event	25354262	25355156	.	+	.	transcript_id "Os01t0633100-01,MSTRG.3598.7"; gene_id "chr1:25353805-25362153W"; flanks "25354262^,25355156^"; structure "1-,2-"; splice_chain "25355074-,25355118-"; sources "Undefined,Undefined"; NMorMRNA "null"; degree "4"; dimension "2_2";
chr1	Undefined	as_event	25353834	25355156	.	+	.	transcript_id "MSTRG.3598.6,MSTRG.3598.7"; gene_id "chr1:25353805-25362153W"; flanks "25353834[,25355156^"; structure "0,1^2-"; splice_chain ",25354262^25355118-"; sources "Undefined,Undefined"; NMorMRNA "null"; degree "4"; dimension "2_2";
chr1	Undefined	as_event	25354262	25356465	.	+	.	transcript_id "MSTRG.3598.8,MSTRG.3598.10"; gene_id "chr1:25353805-25362153W"; flanks "25354262^,25356465^"; structure "1-,2-"; splice_chain "25354936-,25356261-"; sources "Undefined,Undefined"; NMorMRNA "null"; degree "4"; dimension "2_2";
chr1	Undefined	as_event	25353824	25356465	.	+	.	transcript_id "MSTRG.3598.2/MSTRG.3598.4,MSTRG.3598.3/MSTRG.3598.5"; gene_id "chr1:25353805-25362153W"; flanks "25353824[,25356465^"; structure "0,1^2-"; splice_chain ",25355156^25356257-"; sources "Undefined,Undefined"; NMorMRNA "null"; degree "4"; dimension "2_2";
chr1	Undefined	as_event	25355156	25357567	.	+	.	transcript_id "MSTRG.3598.6,MSTRG.3598.5"; gene_id "chr1:25353805-25362153W"; flanks "25355156^,25357567-"; structure "0,1-2^"; splice_chain ",25356257-25356465^"; sources "Undefined,Undefined"; NMorMRNA "null"; degree "4"; dimension "2_2";
chr1	Undefined	as_event	25355156	25357573	.	+	.	transcript_id "MSTRG.3598.12/Os01t0633100-01,MSTRG.3598.3"; gene_id "chr1:25353805-25362153W"; flanks "25355156^,25357573-"; structure "0,1-2^"; splice_chain ",25356257-25356465^"; sources "Undefined,Undefined"; NMorMRNA "null"; degree "4"; dimension "2_2";
chr1	Undefined	as_event	25354262	25357573	.	+	.	transcript_id "MSTRG.3598.8,Os01t0633100-01,MSTRG.3598.10"; gene_id "chr1:25353805-25362153W"; flanks "25354262^,25357573-"; structure "1-5^,2-3^,4-5^"; splice_chain "25354936-25356465^,25355074-25355156^,25356261-25356465^"; sources "Undefined,Undefined,Undefined"; NMorMRNA "null"; degree "9"; dimension "3_3";
chr1	Undefined	as_event	25356465	25357803	.	+	.	transcript_id "MSTRG.3598.4/MSTRG.3598.5,MSTRG.3598.10/MSTRG.3598.2/MSTRG.3598.3/MSTRG.3598.8"; gene_id "chr1:25353805-25362153W"; flanks "25356465^,25357803^"; structure "1-,2-"; splice_chain "25357567-,25357573-"; sources "Undefined,Undefined"; NMorMRNA "null"; degree "4"; dimension "2_2";
chr1	Undefined	as_event	25356257	25357803	.	+	.	transcript_id "MSTRG.3598.7,MSTRG.3598.5,MSTRG.3598.3"; gene_id "chr1:25353805-25362153W"; flanks "25356257-,25357803^"; structure "0,1^2-,1^3-"; splice_chain ",25356465^25357567-,25356465^25357573-"; sources "Undefined,Undefined,Undefined"; NMorMRNA "null"; degree "9"; dimension "3_3";
chr1	Undefined	as_event	25355156	25357803	.	+	.	transcript_id "MSTRG.3598.9,MSTRG.3598.11,MSTRG.3598.7,MSTRG.3598.5,MSTRG.3598.3,MSTRG.3598.6,MSTRG.3598.12/Os01t0633100-01"; gene_id "chr1:25353805-25362153W"; flanks "25355156^,25357803^"; structure "1-,2-,3-,3-4^5-,3-4^6-,5-,6-"; splice_chain "25355919-,25356220-,25356257-,25356257-25356465^25357567-,25356257-25356465^25357573-,25357567-,25357573-"; sources "Undefined,Undefined,Undefined,Undef…
chr1	Undefined	as_event	25354262	25357803	.	+	.	transcript_id "MSTRG.3598.8,Os01t0633100-01,MSTRG.3598.7,MSTRG.3598.10"; gene_id "chr1:25353805-25362153W"; flanks "25354262^,25357803^"; structure "1-7^8-,2-4^8-,3-4^5-,6-7^8-"; splice_chain "25354936-25356465^25357573-,25355074-25355156^25357573-,25355118-25355156^25356257-,25356261-25356465^25357573-"; sources "Undefined,Undefined,Undefined,Undefined"; NMorMRNA "null"; degree "16"; dimension "…
chr1	Undefined	as_event	25353885	25357803	.	+	.	transcript_id "MSTRG.3598.13,MSTRG.3598.12"; gene_id "chr1:25353805-25362153W"; flanks "25353885[,25357803^"; structure "1^3-,2^4-"; splice_chain "25354182^25357567-,25355156^25357573-"; sources "Undefined,Undefined"; NMorMRNA "null"; degree "4"; dimension "2_2";
chr1	Undefined	as_event	25353844	25357803	.	+	.	transcript_id "MSTRG.3598.10,MSTRG.3598.11"; gene_id "chr1:25353805-25362153W"; flanks "25353844[,25357803^"; structure "1^4-5^6-,2^3-"; splice_chain "25354262^25356261-25356465^25357573-,25355156^25356220-"; sources "Undefined,Undefined"; NMorMRNA "null"; degree "4"; dimension "2_2";
chr1	Undefined	as_event	25353834	25357803	.	+	.	transcript_id "MSTRG.3598.8,MSTRG.3598.7,MSTRG.3598.6"; gene_id "chr1:25353805-25362153W"; flanks "25353834[,25357803^"; structure "1^2-6^8-,1^3-4^5-,4^7-"; splice_chain "25354262^25354936-25356465^25357573-,25354262^25355118-25355156^25356257-,25355156^25357567-"; sources "Undefined,Undefined,Undefined"; NMorMRNA "null"; degree "9"; dimension "3_3";
chr1	Undefined	as_event	25359386	25359608	.	+	.	transcript_id "MSTRG.3598.14,MSTRG.3598.10/MSTRG.3598.11/MSTRG.3598.12/MSTRG.3598.13/MSTRG.3598.2/MSTRG.3598.3/MSTRG.3598.4/MSTRG.3598.5/MSTRG.3598.6/MSTRG.3598.7/MSTRG.3598.8/MSTRG.3598.9/Os01t0633100-01"; gene_id "chr1:25353805-25362153W"; flanks "25359386-,25359608^"; structure "0,1^2-"; splice_chain ",25359472^25359553-"; sources "Undefined,Undefined"; NMorMRNA "null"; degree "4"; dimension "…
chr1	Undefined	as_event	25359794	25360033	.	+	.	transcript_id "MSTRG.3598.10/MSTRG.3598.11/MSTRG.3598.12/MSTRG.3598.13/MSTRG.3598.2/MSTRG.3598.3/MSTRG.3598.4/MSTRG.3598.5/MSTRG.3598.6/MSTRG.3598.7/MSTRG.3598.8/MSTRG.3598.9/Os01t0633100-01,MSTRG.3598.14"; gene_id "chr1:25353805-25362153W"; flanks "25359794^,25360033^"; structure "1-,2-"; splice_chain "25359921-,25359925-"; sources "Undefined,Undefined"; NMorMRNA "null"; degree "4"; dimension "2…
chr1	Undefined	as_event	25636657	25637600	.	+	.	transcript_id "MSTRG.3643.2,MSTRG.3643.1"; gene_id "chr1:25636657-25640573W"; flanks "25636657[,25637600-"; structure "1^,2^"; splice_chain "25637311^,25637315^"; sources "Undefined,Undefined"; NMorMRNA "null"; degree "4"; dimension "2_2";
chr1	Undefined	as_event	25637311	25637840	.	+	.	transcript_id "MSTRG.3643.2,MSTRG.3643.3"; gene_id "chr1:25636657-25640573W"; flanks "25637311^,25637840^"; structure "1-,2-"; splice_chain "25637600-,25637607-"; sources "Undefined,Undefined"; NMorMRNA "null"; degree "4"; dimension "2_2";
chr1	Undefined	as_event	25639098	25639442	.	+	.	transcript_id "Os01t0639100-01,MSTRG.3643.1/MSTRG.3643.2/MSTRG.3643.3"; gene_id "chr1:25636657-25640573W"; flanks "25639098-,25639442^"; structure "1^3-,2^4-"; splice_chain "25639262^25639353-,25639265^25639356-"; sources "Undefined,Undefined"; NMorMRNA "null"; degree "4"; dimension "2_2";
chr1	Undefined	as_event	25696929	25700780	.	+	.	transcript_id "Os01t0639900-01,MSTRG.3651.3"; gene_id "chr1:25692715-25705077W"; flanks "25696929^,25700780-"; structure "0,1-2^"; splice_chain ",25700122-25700396^"; sources "Undefined,Undefined"; NMorMRNA "null"; degree "4"; dimension "2_2";
chr1	Undefined	as_event	25692814	25700780	.	+	.	transcript_id "MSTRG.3651.2,MSTRG.3651.1"; gene_id "chr1:25692715-25705077W"; flanks "25692814^,25700780-"; structure "0,1-2^"; splice_chain ",25700122-25700396^"; sources "Undefined,Undefined"; NMorMRNA "null"; degree "4"; dimension "2_2";
chr1	Undefined	as_event	25763793	25764074	.	+	.	transcript_id "MSTRG.3658.2,Os01t0641100-01"; gene_id "chr1:25762489-25766525W"; flanks "25763793-,25764074^"; structure "0,1^2-"; splice_chain ",25763903^25763995-"; sources "Undefined,Undefined"; NMorMRNA "null"; degree "4"; dimension "2_2";
chr1	Undefined	as_event	25865289	25865637	.	+	.	transcript_id "Os01t0643300-01,Os01t0643300-02"; gene_id "chr1:25863717-25868266W"; flanks "25865289-,25865637^"; structure "0,1^2-"; splice_chain ",25865344^25865432-"; sources "Undefined,Undefined"; NMorMRNA "null"; degree "4"; dimension "2_2";
chr1	Undefined	as_event	26165213	26165476	.	+	.	transcript_id "MSTRG.3719.2,Os01t0648500-01"; gene_id "chr1:26163786-26166472W"; flanks "26165213-,26165476^"; structure "0,1^2-"; splice_chain ",26165332^26165416-"; sources "Undefined,Undefined"; NMorMRNA "null"; degree "4"; dimension "2_2";
chr1	Undefined	as_event	26185034	26185912	.	+	.	transcript_id "MSTRG.3725.2/Os01t0649000-01,MSTRG.3725.3"; gene_id "chr1:26183883-26190305W"; flanks "26185034^,26185912^"; structure "1-,2-"; splice_chain "26185758-,26185762-"; sources "Undefined,Undefined"; NMorMRNA "null"; degree "4"; dimension "2_2";
chr1	Undefined	as_event	26186432	26187167	.	+	.	transcript_id "MSTRG.3725.2,MSTRG.3725.3/MSTRG.3725.4/Os01t0649000-01"; gene_id "chr1:26183883-26190305W"; flanks "26186432-,26187167^"; structure "0,1^2-"; splice_chain ",26186520^26186645-"; sources "Undefined,Undefined"; NMorMRNA "null"; degree "4"; dimension "2_2";
chr1	Undefined	as_event	26223989	26224698	.	+	.	transcript_id "MSTRG.3732.3,MSTRG.3732.2/Os01t0649900-01"; gene_id "chr1:26222617-26225685W"; flanks "26223989^,26224698-"; structure "0,1-2^"; splice_chain ",26224095-26224371^"; sources "Undefined,Undefined"; NMorMRNA "null"; degree "4"; dimension "2_2";
chr1	Undefined	as_event	26231667	26234815	.	+	.	transcript_id "MSTRG.3734.5,MSTRG.3734.1"; gene_id "chr1:26230738-26274220W"; flanks "26231667-,26234815-"; structure "1^,2^"; splice_chain "26231722^,26232196^"; sources "Undefined,Undefined"; NMorMRNA "null"; degree "4"; dimension "2_2";
chr1	Undefined	as_event	26231351	26234815	.	+	.	transcript_id "MSTRG.3734.3,MSTRG.3734.5"; gene_id "chr1:26230738-26274220W"; flanks "26231351^,26234815-"; structure "0,1-2^"; splice_chain ",26231667-26231722^"; sources "Undefined,Undefined"; NMorMRNA "null"; degree "4"; dimension "2_2";
chr1	Undefined	as_event	26250049	26251267	.	+	.	transcript_id "MSTRG.3734.10,MSTRG.3734.11"; gene_id "chr1:26230738-26274220W"; flanks "26250049^,26251267^"; structure "1-,2-"; splice_chain "26251150-,26251170-"; sources "Undefined,Undefined"; NMorMRNA "null"; degree "4"; dimension "2_2";
chr1	Undefined	as_event	26250049	26264329	.	+	.	transcript_id "MSTRG.3734.14,MSTRG.3734.12"; gene_id "chr1:26230738-26274220W"; flanks "26250049^,26264329-"; structure "0,1-2^"; splice_chain ",26262911-26262967^"; sources "Undefined,Undefined"; NMorMRNA "null"; degree "4"; dimension "2_2";
chr1	Undefined	as_event	26250049	26272133	.	+	.	transcript_id "MSTRG.3734.9,MSTRG.3734.10,MSTRG.3734.11"; gene_id "chr1:26230738-26274220W"; flanks "26250049^,26272133-"; structure "0,1-3^,2-3^"; splice_chain ",26251150-26251267^,26251170-26251267^"; sources "Undefined,Undefined,Undefined"; NMorMRNA "null"; degree "9"; dimension "3_3";
chr1	Undefined	as_event	26250049	26272281	.	+	.	transcript_id "MSTRG.3734.10,Os01t0650200-01,MSTRG.3734.9"; gene_id "chr1:26230738-26274220W"; flanks "26250049^,26272281^"; structure "1-2^6-,3-4^5-,6-"; splice_chain "26251150-26251267^26272133-,26262911-26262965^26272131-,26272133-"; sources "Undefined,Undefined,Undefined"; NMorMRNA "null"; degree "9"; dimension "3_3";
chr1	Undefined	as_event	26272133	26273062	.	+	.	transcript_id "MSTRG.3734.11/MSTRG.3734.17,MSTRG.3734.10/MSTRG.3734.18/MSTRG.3734.7/MSTRG.3734.9"; gene_id "chr1:26230738-26274220W"; flanks "26272133-,26273062^"; structure "0,1^2-"; splice_chain ",26272281^26272786-"; sources "Undefined,Undefined"; NMorMRNA "null"; degree "4"; dimension "2_2";
chr1	Undefined	as_event	26272131	26273062	.	+	.	transcript_id "Os01t0650200-02,Os01t0650200-01"; gene_id "chr1:26230738-26274220W"; flanks "26272131-,26273062^"; structure "0,1^2-"; splice_chain ",26272281^26272786-"; sources "Undefined,Undefined"; NMorMRNA "null"; degree "4"; dimension "2_2";
chr1	Undefined	as_event	26250049	26273062	.	+	.	transcript_id "MSTRG.3734.10,MSTRG.3734.11,Os01t0650200-02,Os01t0650200-01,MSTRG.3734.9"; gene_id "chr1:26230738-26274220W"; flanks "26250049^,26273062^"; structure "1-3^7-8^9-,2-3^7-,4-5^6-,4-5^6-8^9-,7-8^9-"; splice_chain "26251150-26251267^26272133-26272281^26272786-,26251170-26251267^26272133-,26262911-26262965^26272131-,26262911-26262965^26272131-26272281^26272786-,26272133-26272281^26272786…
chr1	Undefined	as_event	26295386	26297293	.	+	.	transcript_id "MSTRG.3738.1,MSTRG.3738.2"; gene_id "chr1:26293223-26298892W"; flanks "26295386^,26297293^"; structure "1-,2-"; splice_chain "26295849-,26296460-"; sources "Undefined,Undefined"; NMorMRNA "null"; degree "4"; dimension "2_2";
chr1	Undefined	as_event	26528552	26529296	.	+	.	transcript_id "MSTRG.3774.1,MSTRG.3774.2"; gene_id "chr1:26527480-26532048W"; flanks "26528552-,26529296-"; structure "1^,2^"; splice_chain "26528759^,26528781^"; sources "Undefined,Undefined"; NMorMRNA "null"; degree "4"; dimension "2_2";
chr1	Undefined	as_event	26613390	26615129	.	+	.	transcript_id "MSTRG.3788.2,Os01t0655500-01"; gene_id "chr1:26611799-26618704W"; flanks "26613390^,26615129-"; structure "0,1-2^"; splice_chain ",26614891-26614997^"; sources "Undefined,Undefined"; NMorMRNA "null"; degree "4"; dimension "2_2";
chr1	Undefined	as_event	26653767	26657300	.	+	.	transcript_id "MSTRG.3795.2,Os01t0656200-01"; gene_id "chr1:26652966-26658299W"; flanks "26653767^,26657300^"; structure "1-,2-"; splice_chain "26657140-,26657195-"; sources "Undefined,Undefined"; NMorMRNA "null"; degree "4"; dimension "2_2";
chr1	Undefined	as_event	26913964	26918586	.	+	.	transcript_id "Os01t0660550-01,MSTRG.3830.1/MSTRG.3830.2"; gene_id "chr1:26913457-26919668W"; flanks "26913964-,26918586-"; structure "1^,2^"; splice_chain "26914084^,26914085^"; sources "Undefined,Undefined"; NMorMRNA "null"; degree "4"; dimension "2_2";
chr1	Undefined	as_event	26918586	26918828	.	+	.	transcript_id "MSTRG.3830.1,MSTRG.3830.2"; gene_id "chr1:26913457-26919668W"; flanks "26918586-,26918828^"; structure "0,1^2-"; splice_chain ",26918679^26918748-"; sources "Undefined,Undefined"; NMorMRNA "null"; degree "4"; dimension "2_2";
chr1	Undefined	as_event	26918679	26918904	.	+	.	transcript_id "Os01t0660550-01,MSTRG.3830.2"; gene_id "chr1:26913457-26919668W"; flanks "26918679^,26918904-"; structure "0,1-2^"; splice_chain ",26918748-26918828^"; sources "Undefined,Undefined"; NMorMRNA "null"; degree "4"; dimension "2_2";
chr1	Undefined	as_event	26918586	26918904	.	+	.	transcript_id "Os01t0660550-01,MSTRG.3830.2,MSTRG.3830.1"; gene_id "chr1:26913457-26919668W"; flanks "26918586-,26918904-"; structure "1^,1^2-3^,3^"; splice_chain "26918679^,26918679^26918748-26918828^,26918828^"; sources "Undefined,Undefined,Undefined"; NMorMRNA "null"; degree "9"; dimension "3_3";
chr1	Undefined	as_event	26971911	26972873	.	+	.	transcript_id "MSTRG.3835.1,Os01t0660900-00"; gene_id "chr1:26971446-26973519W"; flanks "26971911^,26972873-"; structure "0,1-2^"; splice_chain ",26972061-26972142^"; sources "Undefined,Undefined"; NMorMRNA "null"; degree "4"; dimension "2_2";
chr1	Undefined	as_event	27006723	27006901	.	+	.	transcript_id "MSTRG.3836.7,MSTRG.3836.1/MSTRG.3836.4/MSTRG.3836.5/MSTRG.3836.8/Os01t0661400-01"; gene_id "chr1:26975180-27012127W"; flanks "27006723-,27006901-"; structure "1^,2^"; splice_chain "27006809^,27006813^"; sources "Undefined,Undefined"; NMorMRNA "null"; degree "4"; dimension "2_2";
chr1	Undefined	as_event	27007022	27008038	.	+	.	transcript_id "MSTRG.3836.5,Os01t0661400-01"; gene_id "chr1:26975180-27012127W"; flanks "27007022^,27008038]"; structure "1-,2-"; splice_chain "27007580-,27007693-"; sources "Undefined,Undefined"; NMorMRNA "null"; degree "4"; dimension "2_2";
chr1	Undefined	as_event	27006901	27008038	.	+	.	transcript_id "MSTRG.3836.7,MSTRG.3836.5,Os01t0661400-01"; gene_id "chr1:26975180-27012127W"; flanks "27006901-,27008038]"; structure "0,1^2-,1^3-"; splice_chain ",27007022^27007580-,27007022^27007693-"; sources "Undefined,Undefined,Undefined"; NMorMRNA "null"; degree "9"; dimension "3_3";
chr1	Undefined	as_event	27007576	27009524	.	+	.	transcript_id "MSTRG.3836.8,MSTRG.3836.4"; gene_id "chr1:26975180-27012127W"; flanks "27007576-,27009524^"; structure "0,1^2-"; splice_chain ",27008938^27009484-"; sources "Undefined,Undefined"; NMorMRNA "null"; degree "4"; dimension "2_2";
chr1	Undefined	as_event	27006901	27009524	.	+	.	transcript_id "MSTRG.3836.1,MSTRG.3836.8,MSTRG.3836.4"; gene_id "chr1:26975180-27012127W"; flanks "27006901-,27009524^"; structure "0,1^2-,1^2-3^4-"; splice_chain ",27007022^27007576-,27007022^27007576-27008938^27009484-"; sources "Undefined,Undefined,Undefined"; NMorMRNA "null"; degree "9"; dimension "3_3";
chr1	Undefined	as_event	27009524	27009918	.	+	.	transcript_id "MSTRG.3836.10/MSTRG.3836.8/MSTRG.3836.9/Os01t0661500-01,MSTRG.3836.1/MSTRG.3836.4"; gene_id "chr1:26975180-27012127W"; flanks "27009524^,27009918^"; structure "1-,2-"; splice_chain "27009599-,27009612-"; sources "Undefined,Undefined"; NMorMRNA "null"; degree "4"; dimension "2_2";
chr1	Undefined	as_event	27010664	27011508	.	+	.	transcript_id "MSTRG.3836.10,MSTRG.3836.1/MSTRG.3836.4/MSTRG.3836.8/MSTRG.3836.9"; gene_id "chr1:26975180-27012127W"; flanks "27010664-,27011508^"; structure "0,1^2-"; splice_chain ",27010726^27011456-"; sources "Undefined,Undefined"; NMorMRNA "null"; degree "4"; dimension "2_2";
chr1	Undefined	as_event	27095458	27095806	.	+	.	transcript_id "MSTRG.3854.1,Os01t0663500-01"; gene_id "chr1:27095458-27100193W"; flanks "27095458[,27095806^"; structure "0,1^2-"; splice_chain ",27095626^27095745-"; sources "Undefined,Undefined"; NMorMRNA "null"; degree "4"; dimension "2_2";
chr1	Undefined	as_event	27098371	27099188	.	+	.	transcript_id "MSTRG.3854.3,MSTRG.3854.1/MSTRG.3854.4/Os01t0663500-01"; gene_id "chr1:27095458-27100193W"; flanks "27098371-,27099188^"; structure "0,1^2-"; splice_chain ",27098494^27099120-"; sources "Undefined,Undefined"; NMorMRNA "null"; degree "4"; dimension "2_2";
chr1	Undefined	as_event	27116340	27117180	.	+	.	transcript_id "MSTRG.3857.2,MSTRG.3857.1/Os01t0664000-00"; gene_id "chr1:27115631-27121254W"; flanks "27116340^,27117180^"; structure "1-,2-"; splice_chain "27117002-,27117043-"; sources "Undefined,Undefined"; NMorMRNA "null"; degree "4"; dimension "2_2";
chr1	Undefined	as_event	27117625	27118249	.	+	.	transcript_id "MSTRG.3857.1/MSTRG.3857.2,Os01t0664000-00"; gene_id "chr1:27115631-27121254W"; flanks "27117625-,27118249-"; structure "1^,2^"; splice_chain "27117786^,27117793^"; sources "Undefined,Undefined"; NMorMRNA "null"; degree "4"; dimension "2_2";
chr1	Undefined	as_event	27125361	27126712	.	+	.	transcript_id "MSTRG.3858.1,Os01t0664100-01"; gene_id "chr1:27123488-27129471W"; flanks "27125361^,27126712^"; structure "1-,2-"; splice_chain "27126516-,27126524-"; sources "Undefined,Undefined"; NMorMRNA "null"; degree "4"; dimension "2_2";
chr1	Undefined	as_event	27128065	27128624	.	+	.	transcript_id "MSTRG.3858.1,Os01t0664100-01"; gene_id "chr1:27123488-27129471W"; flanks "27128065-,27128624^"; structure "0,1^2-"; splice_chain ",27128134^27128421-"; sources "Undefined,Undefined"; NMorMRNA "null"; degree "4"; dimension "2_2";
chr1	Undefined	as_event	27145215	27146870	.	+	.	transcript_id "Os01t0664500-03,Os01t0664500-01"; gene_id "chr1:27145068-27149003W"; flanks "27145215^,27146870-"; structure "0,1-2^"; splice_chain ",27146541-27146628^"; sources "Undefined,Undefined"; NMorMRNA "null"; degree "4"; dimension "2_2";
chr1	Undefined	as_event	27173809	27176017	.	+	.	transcript_id "Os01t0665200-02,Os01t0665200-01"; gene_id "chr1:27171290-27178298W"; flanks "27173809^,27176017^"; structure "1-,2-3^4-5^6-"; splice_chain "27174394-,27174408-27174535^27174647-27174706^27175868-"; sources "Undefined,Undefined"; NMorMRNA "null"; degree "4"; dimension "2_2";
chr1	Undefined	as_event	27176725	27177172	.	+	.	transcript_id "Os01t0665200-02,Os01t0665200-01/Os01t0665200-03"; gene_id "chr1:27171290-27178298W"; flanks "27176725-,27177172^"; structure "0,1^2-"; splice_chain ",27176826^27177093-"; sources "Undefined,Undefined"; NMorMRNA "null"; degree "4"; dimension "2_2";
chr1	Undefined	as_event	27262229	27262457	.	+	.	transcript_id "MSTRG.3878.1,MSTRG.3878.3"; gene_id "chr1:27257379-27268743W"; flanks "27262229^,27262457^"; structure "1-,2-"; splice_chain "27262344-,27262349-"; sources "Undefined,Undefined"; NMorMRNA "null"; degree "4"; dimension "2_2";
chr1	Undefined	as_event	27261640	27262457	.	+	.	transcript_id "MSTRG.3878.4,MSTRG.3878.1,MSTRG.3878.3"; gene_id "chr1:27257379-27268743W"; flanks "27261640-,27262457^"; structure "0,1^2-3^4-,1^2-3^5-"; splice_chain ",27261732^27262140-27262229^27262344-,27261732^27262140-27262229^27262349-"; sources "Undefined,Undefined,Undefined"; NMorMRNA "null"; degree "9"; dimension "3_3";
chr1	Undefined	as_event	27262344	27263267	.	+	.	transcript_id "Os01t0666800-01,MSTRG.3878.1"; gene_id "chr1:27257379-27268743W"; flanks "27262344-,27263267^"; structure "1^3-,2^4-"; splice_chain "27262454^27263142-,27262457^27263145-"; sources "Undefined,Undefined"; NMorMRNA "null"; degree "4"; dimension "2_2";
chr1	Undefined	as_event	27262229	27263267	.	+	.	transcript_id "Os01t0666800-01,MSTRG.3878.1,MSTRG.3878.3"; gene_id "chr1:27257379-27268743W"; flanks "27262229^,27263267^"; structure "1-3^5-,1-4^6-,2-4^6-"; splice_chain "27262344-27262454^27263142-,27262344-27262457^27263145-,27262349-27262457^27263145-"; sources "Undefined,Undefined,Undefined"; NMorMRNA "null"; degree "9"; dimension "3_3";
chr1	Undefined	as_event	27261640	27263267	.	+	.	transcript_id "Os01t0666800-01,MSTRG.3878.1,MSTRG.3878.3,MSTRG.3878.4"; gene_id "chr1:27257379-27268743W"; flanks "27261640-,27263267^"; structure "1^2-3^4-6^8-,1^2-3^4-7^9-,1^2-3^5-7^9-,7^9-"; splice_chain "27261732^27262140-27262229^27262344-27262454^27263142-,27261732^27262140-27262229^27262344-27262457^27263145-,27261732^27262140-27262229^27262349-27262457^27263145-,27262457^27263145-"; sourc…
chr1	Undefined	as_event	27263523	27263674	.	+	.	transcript_id "MSTRG.3878.1/MSTRG.3878.3/Os01t0666800-01,MSTRG.3878.4"; gene_id "chr1:27257379-27268743W"; flanks "27263523^,27263674^"; structure "1-,2-"; splice_chain "27263620-,27263664-"; sources "Undefined,Undefined"; NMorMRNA "null"; degree "4"; dimension "2_2";
chr1	Undefined	as_event	27264701	27265014	.	+	.	transcript_id "MSTRG.3878.4,MSTRG.3878.1/MSTRG.3878.3/Os01t0666800-01"; gene_id "chr1:27257379-27268743W"; flanks "27264701-,27265014^"; structure "0,1^2-"; splice_chain ",27264830^27264912-"; sources "Undefined,Undefined"; NMorMRNA "null"; degree "4"; dimension "2_2";
chr1	Undefined	as_event	27337323	27337571	.	+	.	transcript_id "MSTRG.3897.1/Os01t0668000-01/Os01t0668000-02,MSTRG.3897.2"; gene_id "chr1:27336243-27339377W"; flanks "27337323^,27337571^"; structure "1-,2-"; splice_chain "27337423-,27337428-"; sources "Undefined,Undefined"; NMorMRNA "null"; degree "4"; dimension "2_2";
chr1	Undefined	as_event	27359415	27361348	.	+	.	transcript_id "MSTRG.3901.1/Os01t0668300-01,MSTRG.3901.2"; gene_id "chr1:27353997-27365040W"; flanks "27359415^,27361348^"; structure "1-,2-"; splice_chain "27360390-,27360398-"; sources "Undefined,Undefined"; NMorMRNA "null"; degree "4"; dimension "2_2";
chr1	Undefined	as_event	27582039	27582983	.	+	.	transcript_id "MSTRG.3932.1,Os01t0672201-00"; gene_id "chr1:27582039-27598806W"; flanks "27582039[,27582983^"; structure "0,1^2-"; splice_chain ",27582346^27582465-"; sources "Undefined,Undefined"; NMorMRNA "null"; degree "4"; dimension "2_2";
chr1	Undefined	as_event	27602040	27603461	.	+	.	transcript_id "Os01t0672400-02,Os01t0672400-01/Os01t0672400-03/Os01t0672400-04"; gene_id "chr1:27601487-27604913W"; flanks "27602040-,27603461^"; structure "0,1^2-"; splice_chain ",27602236^27603384-"; sources "Undefined,Undefined"; NMorMRNA "null"; degree "4"; dimension "2_2";
chr1	Undefined	as_event	27625702	27625967	.	+	.	transcript_id "Os01t0672700-02,MSTRG.3937.3/MSTRG.3937.4"; gene_id "chr1:27624620-27630428W"; flanks "27625702-,27625967^"; structure "1^3-,2^4-"; splice_chain "27625812^27625909-,27625814^27625911-"; sources "Undefined,Undefined"; NMorMRNA "null"; degree "4"; dimension "2_2";
chr1	Undefined	as_event	27626926	27627127	.	+	.	transcript_id "MSTRG.3937.4,MSTRG.3937.3/Os01t0672700-02"; gene_id "chr1:27624620-27630428W"; flanks "27626926-,27627127^"; structure "0,1^2-"; splice_chain ",27626996^27627085-"; sources "Undefined,Undefined"; NMorMRNA "null"; degree "4"; dimension "2_2";
chr1	Undefined	as_event	27627485	27627825	.	+	.	transcript_id "MSTRG.3937.4,MSTRG.3937.3/Os01t0672700-02"; gene_id "chr1:27624620-27630428W"; flanks "27627485^,27627825^"; structure "1-,2-"; splice_chain "27627745-,27627760-"; sources "Undefined,Undefined"; NMorMRNA "null"; degree "4"; dimension "2_2";
chr1	Undefined	as_event	27726930	27727916	.	+	.	transcript_id "Os01t0674700-00,MSTRG.3957.1"; gene_id "chr1:27725579-27731480W"; flanks "27726930^,27727916^"; structure "1-,2-"; splice_chain "27727725-,27727739-"; sources "Undefined,Undefined"; NMorMRNA "null"; degree "4"; dimension "2_2";
chr1	Undefined	as_event	27730568	27731480	.	+	.	transcript_id "MSTRG.3957.1/Os01t0674700-00,MSTRG.3957.3"; gene_id "chr1:27725579-27731480W"; flanks "27730568^,27731480]"; structure "1-,2-"; splice_chain "27731097-,27731103-"; sources "Undefined,Undefined"; NMorMRNA "null"; degree "4"; dimension "2_2";
chr1	Undefined	as_event	27733237	27733463	.	+	.	transcript_id "MSTRG.3958.4,MSTRG.3958.5"; gene_id "chr1:27733073-27739719W"; flanks "27733237[,27733463^"; structure "0,1^2-"; splice_chain ",27733305^27733395-"; sources "Undefined,Undefined"; NMorMRNA "null"; degree "4"; dimension "2_2";
chr1	Undefined	as_event	27733463	27733948	.	+	.	transcript_id "MSTRG.3958.1/MSTRG.3958.3/MSTRG.3958.5/MSTRG.3958.6,MSTRG.3958.2/MSTRG.3958.4"; gene_id "chr1:27733073-27739719W"; flanks "27733463^,27733948^"; structure "1-,2-"; splice_chain "27733685-,27733688-"; sources "Undefined,Undefined"; NMorMRNA "null"; degree "4"; dimension "2_2";
chr1	Undefined	as_event	27736991	27737377	.	+	.	transcript_id "MSTRG.3958.1/MSTRG.3958.2/MSTRG.3958.3/MSTRG.3958.4/MSTRG.3958.6,MSTRG.3958.5"; gene_id "chr1:27733073-27739719W"; flanks "27736991-,27737377^"; structure "0,1^2-"; splice_chain ",27737160^27737282-"; sources "Undefined,Undefined"; NMorMRNA "null"; degree "4"; dimension "2_2";
chr1	Undefined	as_event	27738108	27738372	.	+	.	transcript_id "MSTRG.3958.1/MSTRG.3958.2/MSTRG.3958.3/MSTRG.3958.5/Os01t0674800-01,MSTRG.3958.4/MSTRG.3958.6"; gene_id "chr1:27733073-27739719W"; flanks "27738108^,27738372^"; structure "1-,2-"; splice_chain "27738240-,27738244-"; sources "Undefined,Undefined"; NMorMRNA "null"; degree "4"; dimension "2_2";
chr1	Undefined	as_event	27923877	27924331	.	+	.	transcript_id "Os01t0678600-03,MSTRG.3981.3"; gene_id "chr1:27922318-27924335W"; flanks "27923877[,27924331]"; structure "0,1^2-"; splice_chain ",27924010^27924070-"; sources "Undefined,Undefined"; NMorMRNA "null"; degree "4"; dimension "2_2";
chr1	Undefined	as_event	27940575	27940971	.	+	.	transcript_id "Os01t0679000-01/Os01t0679000-02,MSTRG.3986.1/MSTRG.3986.2"; gene_id "chr1:27938785-27947252W"; flanks "27940575-,27940971^"; structure "1^3-,2^4-"; splice_chain "27940660^27940821-,27940666^27940827-"; sources "Undefined,Undefined"; NMorMRNA "null"; degree "4"; dimension "2_2";
chr1	Undefined	as_event	27940971	27941564	.	+	.	transcript_id "MSTRG.3986.2/MSTRG.3986.5,MSTRG.3986.1/Os01t0679000-01/Os01t0679000-02"; gene_id "chr1:27938785-27947252W"; flanks "27940971^,27941564^"; structure "1-2^4-,3-"; splice_chain "27941276-27941378^27941467-,27941418-"; sources "Undefined,Undefined"; NMorMRNA "null"; degree "4"; dimension "2_2";
chr1	Undefined	as_event	27945992	27947252	.	+	.	transcript_id "MSTRG.3986.1,MSTRG.3986.5"; gene_id "chr1:27938785-27947252W"; flanks "27945992^,27947252]"; structure "1-,2-"; splice_chain "27946647-,27946737-"; sources "Undefined,Undefined"; NMorMRNA "null"; degree "4"; dimension "2_2";
chr1	Undefined	as_event	27985281	27985603	.	+	.	transcript_id "MSTRG.3990.2,Os01t0679900-01/Os01t0679900-02"; gene_id "chr1:27983688-27990347W"; flanks "27985281-,27985603^"; structure "0,1^2-"; splice_chain ",27985425^27985536-"; sources "Undefined,Undefined"; NMorMRNA "null"; degree "4"; dimension "2_2";
chr1	Undefined	as_event	27985536	27986815	.	+	.	transcript_id "MSTRG.3990.3/Os01t0679900-03,Os01t0679900-01/Os01t0679900-02"; gene_id "chr1:27983688-27990347W"; flanks "27985536-,27986815^"; structure "0,1^2-"; splice_chain ",27985603^27986372-"; sources "Undefined,Undefined"; NMorMRNA "null"; degree "4"; dimension "2_2";
chr1	Undefined	as_event	27985281	27986815	.	+	.	transcript_id "MSTRG.3990.3,Os01t0679900-01/Os01t0679900-02,MSTRG.3990.2"; gene_id "chr1:27983688-27990347W"; flanks "27985281-,27986815^"; structure "1^2-,1^2-3^4-,3^4-"; splice_chain "27985425^27985536-,27985425^27985536-27985603^27986372-,27985603^27986372-"; sources "Undefined,Undefined,Undefined"; NMorMRNA "null"; degree "9"; dimension "3_3";
chr1	Undefined	as_event	28128999	28129270	.	+	.	transcript_id "Os01t0682500-01,MSTRG.4019.1"; gene_id "chr1:28126231-28130554W"; flanks "28128999-,28129270^"; structure "1^3-,2^4-"; splice_chain "28129069^28129150-,28129073^28129154-"; sources "Undefined,Undefined"; NMorMRNA "null"; degree "4"; dimension "2_2";
chr1	Undefined	as_event	28163755	28164137	.	+	.	transcript_id "MSTRG.4024.3/Os01t0683400-01,MSTRG.4024.2"; gene_id "chr1:28161732-28166205W"; flanks "28163755^,28164137^"; structure "1-,2-"; splice_chain "28164046-,28164053-"; sources "Undefined,Undefined"; NMorMRNA "null"; degree "4"; dimension "2_2";
chr1	Undefined	as_event	28164927	28165134	.	+	.	transcript_id "MSTRG.4024.3,MSTRG.4024.2/Os01t0683400-01"; gene_id "chr1:28161732-28166205W"; flanks "28164927^,28165134^"; structure "1-,2-"; splice_chain "28165008-,28165025-"; sources "Undefined,Undefined"; NMorMRNA "null"; degree "4"; dimension "2_2";
chr1	Undefined	as_event	28191237	28191359	.	+	.	transcript_id "MSTRG.4033.7,MSTRG.4033.10"; gene_id "chr1:28187891-28193349W"; flanks "28191237^,28191359^"; structure "1-,2-"; splice_chain "28191321-,28191332-"; sources "Undefined,Undefined"; NMorMRNA "null"; degree "4"; dimension "2_2";
chr1	Undefined	as_event	28191127	28191359	.	+	.	transcript_id "MSTRG.4033.11,MSTRG.4033.7,MSTRG.4033.10"; gene_id "chr1:28187891-28193349W"; flanks "28191127-,28191359^"; structure "0,1^2-,1^3-"; splice_chain ",28191237^28191321-,28191237^28191332-"; sources "Undefined,Undefined,Undefined"; NMorMRNA "null"; degree "9"; dimension "3_3";
chr1	Undefined	as_event	28191237	28191557	.	+	.	transcript_id "MSTRG.4033.2/MSTRG.4033.6/Os01t0684200-01,MSTRG.4033.7,MSTRG.4033.10"; gene_id "chr1:28187891-28193349W"; flanks "28191237^,28191557-"; structure "0,1-3^,2-3^"; splice_chain ",28191321-28191359^,28191332-28191359^"; sources "Undefined,Undefined,Undefined"; NMorMRNA "null"; degree "9"; dimension "3_3";
chr1	Undefined	as_event	28191127	28191557	.	+	.	transcript_id "MSTRG.4033.2/MSTRG.4033.6/Os01t0684200-01,MSTRG.4033.7,MSTRG.4033.10,MSTRG.4033.11"; gene_id "chr1:28187891-28193349W"; flanks "28191127-,28191557-"; structure "1^,1^2-4^,1^3-4^,4^"; splice_chain "28191237^,28191237^28191321-28191359^,28191237^28191332-28191359^,28191359^"; sources "Undefined,Undefined,Undefined,Undefined"; NMorMRNA "null"; degree "16"; dimension "4_4";
chr1	Undefined	as_event	28191127	28191647	.	+	.	transcript_id "MSTRG.4033.3/MSTRG.4033.8,Os01t0684200-01,MSTRG.4033.11"; gene_id "chr1:28187891-28193349W"; flanks "28191127-,28191647^"; structure "0,1^3-,2^3-"; splice_chain ",28191237^28191557-,28191359^28191557-"; sources "Undefined,Undefined,Undefined"; NMorMRNA "null"; degree "9"; dimension "3_3";
chr1	Undefined	as_event	28191557	28191956	.	+	.	transcript_id "MSTRG.4033.10/MSTRG.4033.2/MSTRG.4033.6/MSTRG.4033.7,MSTRG.4033.11/Os01t0684200-01"; gene_id "chr1:28187891-28193349W"; flanks "28191557-,28191956^"; structure "0,1^2-"; splice_chain ",28191647^28191888-"; sources "Undefined,Undefined"; NMorMRNA "null"; degree "4"; dimension "2_2";
chr1	Undefined	as_event	28191127	28191956	.	+	.	transcript_id "MSTRG.4033.1/MSTRG.4033.4/MSTRG.4033.5,MSTRG.4033.7,MSTRG.4033.10,MSTRG.4033.2/MSTRG.4033.6,Os01t0684200-01,MSTRG.4033.11,MSTRG.4033.3/MSTRG.4033.8"; gene_id "chr1:28187891-28193349W"; flanks "28191127-,28191956^"; structure "0,1^2-4^5-,1^3-4^5-,1^5-,1^5-6^7-,4^5-6^7-,6^7-"; splice_chain ",28191237^28191321-28191359^28191557-,28191237^28191332-28191359^28191557-,28191237^28191557-,…
chr1	Undefined	as_event	28192369	28192679	.	+	.	transcript_id "MSTRG.4033.11/MSTRG.4033.6,MSTRG.4033.10/MSTRG.4033.5/MSTRG.4033.7/Os01t0684200-01"; gene_id "chr1:28187891-28193349W"; flanks "28192369-,28192679^"; structure "0,1^2-"; splice_chain ",28192458^28192629-"; sources "Undefined,Undefined"; NMorMRNA "null"; degree "4"; dimension "2_2";
chr1	Undefined	as_event	28192629	28193000	.	+	.	transcript_id "MSTRG.4033.4/MSTRG.4033.8,MSTRG.4033.10/MSTRG.4033.5/MSTRG.4033.7/Os01t0684200-01"; gene_id "chr1:28187891-28193349W"; flanks "28192629-,28193000^"; structure "0,1^2-"; splice_chain ",28192679^28192782-"; sources "Undefined,Undefined"; NMorMRNA "null"; degree "4"; dimension "2_2";
chr1	Undefined	as_event	28192369	28193000	.	+	.	transcript_id "MSTRG.4033.1/MSTRG.4033.2/MSTRG.4033.3,MSTRG.4033.4/MSTRG.4033.8,MSTRG.4033.10/MSTRG.4033.5/MSTRG.4033.7/Os01t0684200-01,MSTRG.4033.11/MSTRG.4033.6"; gene_id "chr1:28187891-28193349W"; flanks "28192369-,28193000^"; structure "0,1^2-,1^2-3^4-,3^4-"; splice_chain ",28192458^28192629-,28192458^28192629-28192679^28192782-,28192679^28192782-"; sources "Undefined,Undefined,Undefined,Unde…
chr1	Undefined	as_event	28295105	28295536	.	+	.	transcript_id "MSTRG.4051.3,MSTRG.4051.4"; gene_id "chr1:28295105-28300065W"; flanks "28295105[,28295536-"; structure "1^,2^"; splice_chain "28295438^,28295441^"; sources "Undefined,Undefined"; NMorMRNA "null"; degree "4"; dimension "2_2";
chr1	Undefined	as_event	28295114	28295656	.	+	.	transcript_id "MSTRG.4051.6,MSTRG.4051.5"; gene_id "chr1:28295105-28300065W"; flanks "28295114[,28295656^"; structure "0,1^2-"; splice_chain ",28295441^28295536-"; sources "Undefined,Undefined"; NMorMRNA "null"; degree "4"; dimension "2_2";
chr1	Undefined	as_event	28295105	28295656	.	+	.	transcript_id "MSTRG.4051.1/MSTRG.4051.2,MSTRG.4051.3,MSTRG.4051.4"; gene_id "chr1:28295105-28300065W"; flanks "28295105[,28295656^"; structure "0,1^3-,2^3-"; splice_chain ",28295438^28295536-,28295441^28295536-"; sources "Undefined,Undefined,Undefined"; NMorMRNA "null"; degree "9"; dimension "3_3";
chr1	Undefined	as_event	28295751	28296892	.	+	.	transcript_id "Os01t0686100-01,MSTRG.4051.1/MSTRG.4051.2/MSTRG.4051.3/MSTRG.4051.4/MSTRG.4051.5/MSTRG.4051.6/MSTRG.4051.7"; gene_id "chr1:28295105-28300065W"; flanks "28295751-,28296892^"; structure "1^3-,2^4-"; splice_chain "28295828^28296789-,28295830^28296791-"; sources "Undefined,Undefined"; NMorMRNA "null"; degree "4"; dimension "2_2";
chr1	Undefined	as_event	28296892	28297465	.	+	.	transcript_id "MSTRG.4051.6,MSTRG.4051.1/MSTRG.4051.2/MSTRG.4051.3/MSTRG.4051.4/MSTRG.4051.5/MSTRG.4051.7/Os01t0686100-01/Os01t0686100-02"; gene_id "chr1:28295105-28300065W"; flanks "28296892^,28297465^"; structure "1-,2-"; splice_chain "28297337-,28297372-"; sources "Undefined,Undefined"; NMorMRNA "null"; degree "4"; dimension "2_2";
chr1	Undefined	as_event	28298340	28299017	.	+	.	transcript_id "MSTRG.4051.3/MSTRG.4051.7,MSTRG.4051.2/MSTRG.4051.4/MSTRG.4051.6"; gene_id "chr1:28295105-28300065W"; flanks "28298340-,28299017^"; structure "0,1^2-"; splice_chain ",28298413^28298957-"; sources "Undefined,Undefined"; NMorMRNA "null"; degree "4"; dimension "2_2";
chr1	Undefined	as_event	28298340	28300000	.	+	.	transcript_id "MSTRG.4051.5,MSTRG.4051.6,MSTRG.4051.3/MSTRG.4051.7"; gene_id "chr1:28295105-28300065W"; flanks "28298340-,28300000]"; structure "0,1^2-3^4-,3^4-"; splice_chain ",28298413^28298957-28299017^28299657-,28299017^28299657-"; sources "Undefined,Undefined,Undefined"; NMorMRNA "null"; degree "9"; dimension "3_3";
chr1	Undefined	as_event	28298340	28300065	.	+	.	transcript_id "MSTRG.4051.1,MSTRG.4051.2/MSTRG.4051.4"; gene_id "chr1:28295105-28300065W"; flanks "28298340-,28300065]"; structure "0,1^2-3^4-"; splice_chain ",28298413^28298957-28299017^28299657-"; sources "Undefined,Undefined"; NMorMRNA "null"; degree "4"; dimension "2_2";
chr1	Undefined	as_event	28345840	28347689	.	+	.	transcript_id "MSTRG.4062.1,MSTRG.4062.2/MSTRG.4062.3"; gene_id "chr1:28345840-28351063W"; flanks "28345840[,28347689-"; structure "1^,2^"; splice_chain "28346412^,28347005^"; sources "Undefined,Undefined"; NMorMRNA "null"; degree "4"; dimension "2_2";
chr1	Undefined	as_event	28347689	28349254	.	+	.	transcript_id "MSTRG.4062.1/MSTRG.4062.2/MSTRG.4062.5,MSTRG.4062.3/MSTRG.4062.6"; gene_id "chr1:28345840-28351063W"; flanks "28347689-,28349254^"; structure "0,1^2-"; splice_chain ",28348425^28348514-"; sources "Undefined,Undefined"; NMorMRNA "null"; degree "4"; dimension "2_2";
chr1	Undefined	as_event	28346887	28349254	.	+	.	transcript_id "Os01t0687300-01/Os01t0687300-02,MSTRG.4062.5,MSTRG.4062.6"; gene_id "chr1:28345840-28351063W"; flanks "28346887-,28349254^"; structure "1^3-,2^4-,2^4-5^6-"; splice_chain "28347003^28347687-,28347005^28347689-,28347005^28347689-28348425^28348514-"; sources "Undefined,Undefined,Undefined"; NMorMRNA "null"; degree "9"; dimension "3_3";
chr1	Undefined	as_event	28346412	28349254	.	+	.	transcript_id "Os01t0687300-01/Os01t0687300-02,MSTRG.4062.1"; gene_id "chr1:28345840-28351063W"; flanks "28346412^,28349254^"; structure "1-2^3-,4-"; splice_chain "28346887-28347003^28347687-,28347689-"; sources "Undefined,Undefined"; NMorMRNA "null"; degree "4"; dimension "2_2";
chr1	Undefined	as_event	28367174	28367428	.	+	.	transcript_id "Os01t0687500-01,MSTRG.4065.3"; gene_id "chr1:28364038-28368033W"; flanks "28367174^,28367428^"; structure "1-,2-"; splice_chain "28367231-,28367247-"; sources "Undefined,Undefined"; NMorMRNA "null"; degree "4"; dimension "2_2";
chr1	Undefined	as_event	28367115	28367428	.	+	.	transcript_id "MSTRG.4065.2,Os01t0687500-01,MSTRG.4065.3"; gene_id "chr1:28364038-28368033W"; flanks "28367115-,28367428^"; structure "0,1^2-,1^3-"; splice_chain ",28367174^28367231-,28367174^28367247-"; sources "Undefined,Undefined,Undefined"; NMorMRNA "null"; degree "9"; dimension "3_3";
chr1	Undefined	as_event	28481213	28481557	.	+	.	transcript_id "MSTRG.4084.1,Os01t0689800-01,MSTRG.4084.3"; gene_id "chr1:28479278-28482802W"; flanks "28481213^,28481557^"; structure "1-,2-,3-"; splice_chain "28481301-,28481321-,28481346-"; sources "Undefined,Undefined,Undefined"; NMorMRNA "null"; degree "9"; dimension "3_3";
chr1	Undefined	as_event	28532635	28534387	.	+	.	transcript_id "Os01t0690800-01,MSTRG.4089.1/MSTRG.4089.3"; gene_id "chr1:28522483-28534387W"; flanks "28532635-,28534387]"; structure "0,1^2-"; splice_chain ",28533685^28533966-"; sources "Undefined,Undefined"; NMorMRNA "null"; degree "4"; dimension "2_2";
chr1	Undefined	as_event	28539955	28540384	.	+	.	transcript_id "MSTRG.4095.1,Os01t0691400-00"; gene_id "chr1:28539955-28541560W"; flanks "28539955[,28540384^"; structure "0,1^2-"; splice_chain ",28540093^28540204-"; sources "Undefined,Undefined"; NMorMRNA "null"; degree "4"; dimension "2_2";
chr1	Undefined	as_event	28551823	28552093	.	+	.	transcript_id "Os01t0691600-01,MSTRG.4097.1/Os01t0691600-02"; gene_id "chr1:28545585-28553746W"; flanks "28551823-,28552093^"; structure "0,1^2-"; splice_chain ",28551895^28551980-"; sources "Undefined,Undefined"; NMorMRNA "null"; degree "4"; dimension "2_2";
chr1	Undefined	as_event	28552923	28553244	.	+	.	transcript_id "Os01t0691600-01,MSTRG.4097.1/Os01t0691600-02"; gene_id "chr1:28545585-28553746W"; flanks "28552923-,28553244^"; structure "0,1^2-"; splice_chain ",28553006^28553102-"; sources "Undefined,Undefined"; NMorMRNA "null"; degree "4"; dimension "2_2";
chr1	Undefined	as_event	28580939	28581189	.	+	.	transcript_id "Os01t0692600-01,MSTRG.4106.3,MSTRG.4106.1"; gene_id "chr1:28578167-28582863W"; flanks "28580939^,28581189^"; structure "1-,2-,3-"; splice_chain "28581015-,28581019-,28581058-"; sources "Undefined,Undefined,Undefined"; NMorMRNA "null"; degree "9"; dimension "3_3";
chr1	Undefined	as_event	28605063	28605489	.	+	.	transcript_id "Os01t0693300-01,MSTRG.4109.1"; gene_id "chr1:28605063-28608212W"; flanks "28605063[,28605489-"; structure "1^,2^"; splice_chain "28605286^,28605291^"; sources "Undefined,Undefined"; NMorMRNA "null"; degree "4"; dimension "2_2";
chr1	Undefined	as_event	28732467	28732720	.	+	.	transcript_id "Os01t0694900-01,MSTRG.4124.1"; gene_id "chr1:28728933-28735109W"; flanks "28732467-,28732720^"; structure "1^3-,2^4-"; splice_chain "28732545^28732641-,28732547^28732643-"; sources "Undefined,Undefined"; NMorMRNA "null"; degree "4"; dimension "2_2";
chr1	Undefined	as_event	28741817	28742918	.	+	.	transcript_id "Os01t0695100-01,MSTRG.4125.1"; gene_id "chr1:28739508-28744712W"; flanks "28741817-,28742918^"; structure "0,1^2-3^4-5^6-"; splice_chain ",28741954^28742100-28742237^28742443-28742586^28742808-"; sources "Undefined,Undefined"; NMorMRNA "null"; degree "4"; dimension "2_2";
chr1	Undefined	as_event	28743003	28744712	.	+	.	transcript_id "Os01t0695100-01,MSTRG.4125.1"; gene_id "chr1:28739508-28744712W"; flanks "28743003-,28744712]"; structure "0,1^2-3^4-5^6-7^8-9^10-"; splice_chain ",28743144^28743242-28743522^28743800-28743961^28744056-28744109^28744215-28744289^28744379-"; sources "Undefined,Undefined"; NMorMRNA "null"; degree "4"; dimension "2_2";
chr1	Undefined	as_event	28773552	28774264	.	+	.	transcript_id "MSTRG.4129.5/Os01t0695700-00,MSTRG.4129.2"; gene_id "chr1:28768976-28780102W"; flanks "28773552-,28774264-"; structure "1^,2^"; splice_chain "28773606^,28773706^"; sources "Undefined,Undefined"; NMorMRNA "null"; degree "4"; dimension "2_2";
chr1	Undefined	as_event	28769242	28774264	.	+	.	transcript_id "MSTRG.4129.3/MSTRG.4129.4,MSTRG.4129.5/Os01t0695700-00,MSTRG.4129.2"; gene_id "chr1:28768976-28780102W"; flanks "28769242^,28774264-"; structure "0,1-2^,1-3^"; splice_chain ",28773552-28773606^,28773552-28773706^"; sources "Undefined,Undefined,Undefined"; NMorMRNA "null"; degree "9"; dimension "3_3";
chr1	Undefined	as_event	28775263	28776858	.	+	.	transcript_id "MSTRG.4129.5,MSTRG.4129.4/Os01t0695700-00"; gene_id "chr1:28768976-28780102W"; flanks "28775263^,28776858-"; structure "0,1-2^3-4^"; splice_chain ",28775373-28775611^28776242-28776767^"; sources "Undefined,Undefined"; NMorMRNA "null"; degree "4"; dimension "2_2";
chr1	Undefined	as_event	28776242	28777131	.	+	.	transcript_id "MSTRG.4129.2/MSTRG.4129.3/MSTRG.4129.6,MSTRG.4129.4/Os01t0695700-00"; gene_id "chr1:28768976-28780102W"; flanks "28776242-,28777131^"; structure "0,1^2-"; splice_chain ",28776767^28776858-"; sources "Undefined,Undefined"; NMorMRNA "null"; degree "4"; dimension "2_2";
chr1	Undefined	as_event	28775263	28777131	.	+	.	transcript_id "MSTRG.4129.2/MSTRG.4129.3,MSTRG.4129.4/Os01t0695700-00,MSTRG.4129.5"; gene_id "chr1:28768976-28780102W"; flanks "28775263^,28777131^"; structure "1-2^3-,1-2^3-4^5-,5-"; splice_chain "28775373-28775611^28776242-,28775373-28775611^28776242-28776767^28776858-,28776858-"; sources "Undefined,Undefined,Undefined"; NMorMRNA "null"; degree "9"; dimension "3_3";
chr1	Undefined	as_event	28777238	28778191	.	+	.	transcript_id "MSTRG.4129.2/MSTRG.4129.6,MSTRG.4129.3/MSTRG.4129.4/MSTRG.4129.5/Os01t0695700-00"; gene_id "chr1:28768976-28780102W"; flanks "28777238-,28778191^"; structure "0,1^2-"; splice_chain ",28777877^28777963-"; sources "Undefined,Undefined"; NMorMRNA "null"; degree "4"; dimension "2_2";
chr1	Undefined	as_event	28779037	28779443	.	+	.	transcript_id "MSTRG.4129.2/MSTRG.4129.3/MSTRG.4129.4/MSTRG.4129.5/Os01t0695700-00,MSTRG.4129.6"; gene_id "chr1:28768976-28780102W"; flanks "28779037^,28779443-"; structure "0,1-2^"; splice_chain ",28779268-28779323^"; sources "Undefined,Undefined"; NMorMRNA "null"; degree "4"; dimension "2_2";
chr1	Undefined	as_event	28799961	28800418	.	+	.	transcript_id "MSTRG.4134.1/MSTRG.4134.2/Os01t0696000-02,MSTRG.4134.5/MSTRG.4134.6"; gene_id "chr1:28798880-28803870W"; flanks "28799961-,28800418^"; structure "0,1^2-"; splice_chain ",28800171^28800265-"; sources "Undefined,Undefined"; NMorMRNA "null"; degree "4"; dimension "2_2";
chr1	Undefined	as_event	28799596	28800418	.	+	.	transcript_id "MSTRG.4134.1/MSTRG.4134.2/Os01t0696000-02,MSTRG.4134.5/MSTRG.4134.6,Os01t0696000-01"; gene_id "chr1:28798880-28803870W"; flanks "28799596^,28800418^"; structure "1-,1-3^4-,2-"; splice_chain "28799961-,28799961-28800171^28800265-,28800010-"; sources "Undefined,Undefined,Undefined"; NMorMRNA "null"; degree "9"; dimension "3_3";
chr1	Undefined	as_event	28800658	28802605	.	+	.	transcript_id "MSTRG.4134.2/MSTRG.4134.5,MSTRG.4134.6"; gene_id "chr1:28798880-28803870W"; flanks "28800658^,28802605^"; structure "1-,2-"; splice_chain "28801576-,28802370-"; sources "Undefined,Undefined"; NMorMRNA "null"; degree "4"; dimension "2_2";
chr1	Undefined	as_event	28800658	28803165	.	+	.	transcript_id "MSTRG.4134.1,Os01t0696000-02"; gene_id "chr1:28798880-28803870W"; flanks "28800658^,28803165-"; structure "0,1-2^"; splice_chain ",28801576-28802910^"; sources "Undefined,Undefined"; NMorMRNA "null"; degree "4"; dimension "2_2";
chr1	Undefined	as_event	28801576	28803859	.	+	.	transcript_id "MSTRG.4134.5,Os01t0696000-02"; gene_id "chr1:28798880-28803870W"; flanks "28801576-,28803859]"; structure "1^2-,3^4-"; splice_chain "28802605^28802700-,28802910^28803165-"; sources "Undefined,Undefined"; NMorMRNA "null"; degree "4"; dimension "2_2";
chr1	Undefined	as_event	28800658	28803870	.	+	.	transcript_id "MSTRG.4134.2,MSTRG.4134.1"; gene_id "chr1:28798880-28803870W"; flanks "28800658^,28803870]"; structure "1-2^3-,4-"; splice_chain "28801576-28802605^28802700-,28803165-"; sources "Undefined,Undefined"; NMorMRNA "null"; degree "4"; dimension "2_2";
chr1	Undefined	as_event	28887074	28887318	.	+	.	transcript_id "MSTRG.4147.8,MSTRG.4147.7"; gene_id "chr1:28885419-28890820W"; flanks "28887074^,28887318^"; structure "1-,2-"; splice_chain "28887178-,28887240-"; sources "Undefined,Undefined"; NMorMRNA "null"; degree "4"; dimension "2_2";
chr1	Undefined	as_event	28885481	28887318	.	+	.	transcript_id "MSTRG.4147.9,MSTRG.4147.8,MSTRG.4147.7"; gene_id "chr1:28885419-28890820W"; flanks "28885481[,28887318^"; structure "1^2-,3^4-,3^5-"; splice_chain "28886807^28886932-,28887074^28887178-,28887074^28887240-"; sources "Undefined,Undefined,Undefined"; NMorMRNA "null"; degree "9"; dimension "3_3";
chr1	Undefined	as_event	28887074	28887496	.	+	.	transcript_id "MSTRG.4147.5/Os01t0698100-01,MSTRG.4147.8,MSTRG.4147.7"; gene_id "chr1:28885419-28890820W"; flanks "28887074^,28887496-"; structure "0,1-3^,2-3^"; splice_chain ",28887178-28887318^,28887240-28887318^"; sources "Undefined,Undefined,Undefined"; NMorMRNA "null"; degree "9"; dimension "3_3";
chr1	Undefined	as_event	28886932	28887496	.	+	.	transcript_id "Os01t0698100-01,MSTRG.4147.2/MSTRG.4147.9"; gene_id "chr1:28885419-28890820W"; flanks "28886932-,28887496-"; structure "1^,2^"; splice_chain "28887074^,28887318^"; sources "Undefined,Undefined"; NMorMRNA "null"; degree "4"; dimension "2_2";
chr1	Undefined	as_event	28885481	28887496	.	+	.	transcript_id "MSTRG.4147.9,MSTRG.4147.5,MSTRG.4147.8,MSTRG.4147.7"; gene_id "chr1:28885419-28890820W"; flanks "28885481[,28887496-"; structure "1^2-6^,3^,3^4-6^,3^5-6^"; splice_chain "28886807^28886932-28887318^,28887074^,28887074^28887178-28887318^,28887074^28887240-28887318^"; sources "Undefined,Undefined,Undefined,Undefined"; NMorMRNA "null"; degree "16"; dimension "4_4";
chr1	Undefined	as_event	28887240	28888275	.	+	.	transcript_id "MSTRG.4147.3,MSTRG.4147.7"; gene_id "chr1:28885419-28890820W"; flanks "28887240-,28888275^"; structure "0,1^2-"; splice_chain ",28887318^28887496-"; sources "Undefined,Undefined"; NMorMRNA "null"; degree "4"; dimension "2_2";
chr1	Undefined	as_event	28887178	28888275	.	+	.	transcript_id "MSTRG.4147.6,MSTRG.4147.8"; gene_id "chr1:28885419-28890820W"; flanks "28887178-,28888275^"; structure "0,1^2-"; splice_chain ",28887318^28887496-"; sources "Undefined,Undefined"; NMorMRNA "null"; degree "4"; dimension "2_2";
chr1	Undefined	as_event	28887074	28888275	.	+	.	transcript_id "MSTRG.4147.6,MSTRG.4147.8,MSTRG.4147.3,MSTRG.4147.7,MSTRG.4147.5/Os01t0698100-01"; gene_id "chr1:28885419-28890820W"; flanks "28887074^,28888275^"; structure "1-,1-3^4-,2-,2-3^4-,4-"; splice_chain "28887178-,28887178-28887318^28887496-,28887240-,28887240-28887318^28887496-,28887496-"; sources "Undefined,Undefined,Undefined,Undefined,Undefined"; NMorMRNA "null"; degree "25"; dimensi…
chr1	Undefined	as_event	28886932	28888275	.	+	.	transcript_id "MSTRG.4147.1,MSTRG.4147.3,Os01t0698100-01,MSTRG.4147.2/MSTRG.4147.9"; gene_id "chr1:28885419-28890820W"; flanks "28886932-,28888275^"; structure "0,1^2-,1^4-,3^4-"; splice_chain ",28887074^28887240-,28887074^28887496-,28887318^28887496-"; sources "Undefined,Undefined,Undefined,Undefined"; NMorMRNA "null"; degree "16"; dimension "4_4";
chr1	Undefined	as_event	28885481	28888275	.	+	.	transcript_id "MSTRG.4147.9,MSTRG.4147.6,MSTRG.4147.8,MSTRG.4147.7,MSTRG.4147.5"; gene_id "chr1:28885419-28890820W"; flanks "28885481[,28888275^"; structure "1^2-6^7-,3^4-,3^4-6^7-,3^5-6^7-,3^7-"; splice_chain "28886807^28886932-28887318^28887496-,28887074^28887178-,28887074^28887178-28887318^28887496-,28887074^28887240-28887318^28887496-,28887074^28887496-"; sources "Undefined,Undefined,Undefine…
chr1	Undefined	as_event	29021333	29024272	.	+	.	transcript_id "Os01t0700900-02,Os01t0700900-01"; gene_id "chr1:29020797-29025975W"; flanks "29021333^,29024272-"; structure "0,1-2^"; splice_chain ",29023687-29023806^"; sources "Undefined,Undefined"; NMorMRNA "null"; degree "4"; dimension "2_2";
chr1	Undefined	as_event	29024272	29025253	.	+	.	transcript_id "Os01t0700900-01,Os01t0700900-02"; gene_id "chr1:29020797-29025975W"; flanks "29024272-,29025253^"; structure "1^3-,2^4-"; splice_chain "29025079^29025155-,29025082^29025158-"; sources "Undefined,Undefined"; NMorMRNA "null"; degree "4"; dimension "2_2";
chr1	Undefined	as_event	29110024	29110582	.	+	.	transcript_id "MSTRG.4187.6,MSTRG.4187.7,MSTRG.4187.8"; gene_id "chr1:29109246-29119359W"; flanks "29110024[,29110582^"; structure "0,1^2-,3^4-"; splice_chain ",29110179^29110250-,29110396^29110484-"; sources "Undefined,Undefined,Undefined"; NMorMRNA "null"; degree "9"; dimension "3_3";
chr1	Undefined	as_event	29109966	29110582	.	+	.	transcript_id "MSTRG.4187.5,MSTRG.4187.4"; gene_id "chr1:29109246-29119359W"; flanks "29109966[,29110582^"; structure "0,1^2-"; splice_chain ",29110179^29110250-"; sources "Undefined,Undefined"; NMorMRNA "null"; degree "4"; dimension "2_2";
chr1	Undefined	as_event	29110755	29111417	.	+	.	transcript_id "MSTRG.4187.5/MSTRG.4187.7/MSTRG.4187.9,MSTRG.4187.1/MSTRG.4187.2/MSTRG.4187.4/MSTRG.4187.6/MSTRG.4187.8/Os01t0702400-01"; gene_id "chr1:29109246-29119359W"; flanks "29110755^,29111417^"; structure "1-,2-"; splice_chain "29111226-,29111315-"; sources "Undefined,Undefined"; NMorMRNA "null"; degree "4"; dimension "2_2";
chr1	Undefined	as_event	29111625	29112240	.	+	.	transcript_id "MSTRG.4187.1/MSTRG.4187.2/MSTRG.4187.4/MSTRG.4187.5/MSTRG.4187.6/MSTRG.4187.7/Os01t0702400-01,MSTRG.4187.10/MSTRG.4187.9"; gene_id "chr1:29109246-29119359W"; flanks "29111625^,29112240^"; structure "1-,2-"; splice_chain "29112157-,29112164-"; sources "Undefined,Undefined"; NMorMRNA "null"; degree "4"; dimension "2_2";
chr1	Undefined	as_event	29111541	29112240	.	+	.	transcript_id "MSTRG.4187.8,MSTRG.4187.1/MSTRG.4187.2/MSTRG.4187.4/MSTRG.4187.5/MSTRG.4187.6/MSTRG.4187.7/Os01t0702400-01,MSTRG.4187.10/MSTRG.4187.9"; gene_id "chr1:29109246-29119359W"; flanks "29111541-,29112240^"; structure "0,1^2-,1^3-"; splice_chain ",29111625^29112157-,29111625^29112164-"; sources "Undefined,Undefined,Undefined"; NMorMRNA "null"; degree "9"; dimension "3_3";
chr1	Undefined	as_event	29116832	29116956	.	+	.	transcript_id "MSTRG.4187.1/MSTRG.4187.4/MSTRG.4187.7/MSTRG.4187.8/MSTRG.4187.9/Os01t0702400-01,MSTRG.4187.10/MSTRG.4187.2/MSTRG.4187.5/MSTRG.4187.6"; gene_id "chr1:29109246-29119359W"; flanks "29116832^,29116956^"; structure "1-,2-"; splice_chain "29116903-,29116910-"; sources "Undefined,Undefined"; NMorMRNA "null"; degree "4"; dimension "2_2";
chr1	Undefined	as_event	29117908	29118588	.	+	.	transcript_id "MSTRG.4187.1/MSTRG.4187.10/MSTRG.4187.2/MSTRG.4187.4/MSTRG.4187.5/MSTRG.4187.6/MSTRG.4187.7/MSTRG.4187.8/MSTRG.4187.9,Os01t0702400-01"; gene_id "chr1:29109246-29119359W"; flanks "29117908-,29118588^"; structure "0,1^2-"; splice_chain ",29118173^29118330-"; sources "Undefined,Undefined"; NMorMRNA "null"; degree "4"; dimension "2_2";
chr1	Undefined	as_event	29169602	29169806	.	+	.	transcript_id "Os01t0703600-01,Os01t0703600-02"; gene_id "chr1:29166421-29170361W"; flanks "29169602^,29169806^"; structure "1-,2-"; splice_chain "29169684-,29169698-"; sources "Undefined,Undefined"; NMorMRNA "null"; degree "4"; dimension "2_2";
chr1	Undefined	as_event	29218284	29218886	.	+	.	transcript_id "MSTRG.4209.2/MSTRG.4209.3/MSTRG.4209.6/MSTRG.4209.7,MSTRG.4209.1/Os01t0704700-01"; gene_id "chr1:29216131-29221801W"; flanks "29218284^,29218886^"; structure "1-,2-"; splice_chain "29218670-,29218689-"; sources "Undefined,Undefined"; NMorMRNA "null"; degree "4"; dimension "2_2";
chr1	Undefined	as_event	29218886	29219835	.	+	.	transcript_id "MSTRG.4209.2/Os01t0704700-01,MSTRG.4209.1/MSTRG.4209.3,MSTRG.4209.6,MSTRG.4209.7"; gene_id "chr1:29216131-29221801W"; flanks "29218886^,29219835^"; structure "1-,2-,3-,4-"; splice_chain "29219325-,29219369-,29219676-,29219729-"; sources "Undefined,Undefined,Undefined,Undefined"; NMorMRNA "null"; degree "16"; dimension "4_4";
[truncated: 22,724 more rows]
