# Supplementary material for: Transcriptional Landscape of Pathogen-responsive Lncrnas Reveals OS_LNC1812-Induced Disease Resistance by Abscisic Acid Pathway in Rice
Source: Research Square preprint supplement (doi:10.21203/rs.3.rs-244393/v1), 2021-03-01
Supplement: Supplementary file 16 [file ceb187bec0bf8f05add415a6.xlsx]

## Sheet: Sheet1
ID	Forward primer	Reverse primer
OS_LNC0105	AGCACTTGCTGACTGACACG	AGCTTGGGTCACAATCTCGC
OS_LNC0202	AAGGAGGCATCAAGCACCAT	ATTCCTGTTTGGGCTCGTGA
OS_LNC0322	CGGAACGCCAGTTAGGAGAA	AATCCGCGGCTTCATTTCAC
OS_LNC0544	ATCTTTCAGGTTGGGCTGCT	TCCATGAGTTCTTGTGCCGT
OS_LNC0574	ATGTGCGATGGCTCTACAGT	TGTGAACCCTTGGACAACCC
OS_LNC0654	AGGTCACTGGCCAAATCCAC	ACAAGAACTCGTCTGCACCA
OS_LNC0941	AACTCTGGTACACACACGGC	GTGTTGTGTGCAGCTTCAGT
OS_LNC1561	TGAGCACTGACACGAGAAGC	AAGCCGTTTCTGACGACAAG
OS_LNC1573	GTACTTTCCGTCGGCGTCTT	CAGTTGGACAACCGGAGGTA
OS_LNC1904	ACCGTGGATTCAGTGGTACG	AGAACGAACGCAGCCTAAGT
OS_LNC0494	ATGGCTTCCACCATCTTCGT	CCCCTTAACTGAGGGCTTGC
OS_LNC1144	ACGTTCGTTAGCTCGTTCCA	ACCCAACTTGCTTCACAACG
OS_LNC1812	AAGTGGGACTCTCGAATGGC	TTAACCGGAAGCATGGCACA
Os01t0730700-01	AGCCCATCAAAGGCTCACC	GTAGGTGACGATCACCGTGT
Os01t0867300-01	CCCGTCTCATGTCGTCTCAT	AGACGAGAGCTCCAAACGTG
RBSDV_CP	GATCGTATTGACAGACATACCAGC	ACTGTAGTTGAAGTACTAGTGGCAC
RSV_CP	CTAGTCATCTGCACCTTCTGCCTC	TAATGTAATCAAAACAAGGTACAG
