# Supplementary material for: Transcriptional Landscape of Pathogen-responsive Lncrnas Reveals OS_LNC1812-Induced Disease Resistance by Abscisic Acid Pathway in Rice
Source: Research Square preprint supplement (doi:10.21203/rs.3.rs-244393/v1), 2021-03-01
Supplement: Supplementary file 17 [file eb7f3e41277c7a315872bcb1.xlsx]

## Sheet: summary
Sample name	Raw reads	Clean reads	Clean bases	Valid(%)	Q20(%)	Q30(%)	GC content(%)
CK1	69748006	63191578	6.3G	90.6	100	100	50.83
CK2	70089092	62831734	6.3G	89.65	100	100	49.41
CK3	68953916	62872142	6.3G	91.18	100	100	48.4
RBSDV1	70632096	64677702	6.5G	91.57	100	100	47.5
RBSDV2	67103194	60831668	6.1G	90.65	100	100	45.73
RBSDV3	66896368	61313444	6.1G	91.65	100	100	46.11
RSV1	72906594	65872136	6.6G	90.35	100	100	50.4
RSV2	68497788	59858846	6.0G	87.39	100	100	49.18
RSV3	67824038	61908346	6.2G	91.28	100	100	49.05
